# Supplementary material for: Atroposelective [4+1] annulation for the synthesis of isotopic isoindolinones bearing both central and axial chirality
Source: Royal Society of Chemistry journal article supplement (doi:10.1039/d5sc00594a), 2025-01-01
Supplement: d5sc00594a1.pdf [file d5sc00594a1.pdf]

## Table of contents

|                                                                                                                              |      |
|------------------------------------------------------------------------------------------------------------------------------|------|
| General Information .....                                                                                                    | S2   |
| Synthesis of 2-acetylbenzaldehyde.....                                                                                       | S2   |
| Synthesis of 2-(phenylsulfonyl)-1 <i>H</i> -indol-1-amine .....                                                              | S3   |
| General procedure for synthesis of products <b>4a/5a</b> .....                                                               | S8   |
| Products characterization for chiral isoindolinones.....                                                                     | S8   |
| General procedure for synthesis of products <b>4</b> and <b>5</b> .....                                                      | S19  |
| Isotopic ratio analysis .....                                                                                                | S19  |
| Synthetic applications of <b>3a</b> .....                                                                                    | S24  |
| X-ray structures of ( <i>P</i> , <i>S</i> )- <b>3a</b> , ( <i>M</i> , <i>R</i> )- <b>3a</b> , <b>Int0</b> and <b>8</b> ..... | S28  |
| Racemization experiment .....                                                                                                | S32  |
| Computational methods.....                                                                                                   | S34  |
| Cartesian coordinates for all optimized geometries .....                                                                     | S36  |
| References .....                                                                                                             | S139 |
| NMR spectrums .....                                                                                                          | S140 |
| HPLC data .....                                                                                                              | S204 |

## General Information

Unless otherwise noted, all starting materials were purchased from commercial sources and used without any further purification. Toluene, Chlorobenzene, DCM,  $\text{CHCl}_3$ ,  $\text{CCl}_4$ , THF,  $\text{D}_2\text{O}$ ,  $\text{H}_2^{18}\text{O}$ , EA and PE were obtained from commercial sources. The analytical data for the known compounds were found to match with the literature data. TLC plates were visualized under UV light (254 nm) or by staining with phosphomolybdic acid or  $\text{KMnO}_4$  followed by heating. Abbreviations are reported as follows: DCM = dichloromethane, THF = tetrahydrofuran, EA = ethyl acetate, PE = petroleum ether,  $\text{D}_2\text{O}$  = deuterium oxide,  $\text{H}_2^{18}\text{O}$  = heavy-oxygen water, TLC = thin layer chromatograph, ee = enantiomeric excess, dr = diastereomeric ratio, rt = room temperature.  $^1\text{H}$  NMR,  $^{19}\text{F}$  NMR and  $^{13}\text{C}$  NMR spectra were recorded on Bruker-*AVANCE* 500 spectrometer, and chemical shifts are reported in ppm. Multiplicities are reported using the following abbreviations: s = singlet, d = doublet, t = triplet, q = quartet, p = pentet, m = multiplet. High resolution mass spectra were obtained by using the UHD Accurate-Mass Q-TOF. Enantiomeric excess (ee) and diastereomeric ratio (dr) were determined on a Thermo Fisher UltiMate 3000 Chiral HPLC using AD, OD, IA and IC column. X-ray crystallographic analysis was carried out by Bruker APEX-II CCD. Reflections were merged by SHEXL according to the crystal class for calculation of statistics and refinement.

## Synthesis of 2-acetylbenzaldehyde

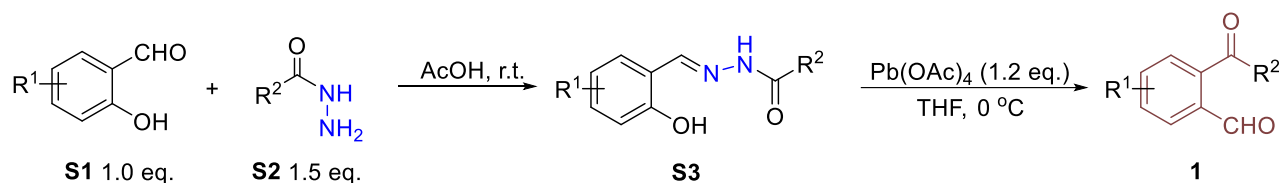

The 2-acetylbenzaldehyde were synthesized according to the literature<sup>[1]</sup> with the modifications.

**Procedure 1:** The salicylaldehyde **S1** (1.0 ml, 10 mmol, 1.0 equiv.) was added to a solution containing the acylhydrazine **S2** (1.11 g, 15 mmol, 1.5 equiv.) in AcOH (30 mL) at room temperature. The reaction mixture was stirred at room temperature for 2 h. Then, the resulting solution was poured into ice water and extracted with  $\text{CH}_2\text{Cl}_2$ . The organic layer was washed with brine, dried over anhydrous  $\text{MgSO}_4$ , and evaporated under reduce pressure to give the title compound **S3**. The product could be used for the next step without further purification.

**Procedure 2:** To a solution containing the **S3** (10 mmol, 1.0 equiv.) in anhydrous THF (30 mL) was added lead tetraacetate (5.4 g, 12 mmol, 1.2 equiv.) at 0 °C. The reaction mixture was stirred at 0 °C and monitored by TLC. After completion (3 h), the resulting reaction was filtered through celite and washed with EA (3 × 20 mL). The filtrate was washed with saturated aqueous solution of  $\text{NaHCO}_3$  and brine. The organic layer was dried over anhydrous  $\text{MgSO}_4$  and evaporated under reduce pressure. The crude product was purified by column chromatography over silica gel (PE: EA= 10:1) to afford the desired product.

The characterizations of unknown products were as following:

### 2-butyrylbenzaldehyde (1c')

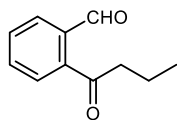

$^1\text{H}$  NMR (500 MHz,  $\text{CDCl}_3$ )  $^1\text{H}$  NMR (500 MHz, Chloroform-*d*)  $\delta$  10.19 (s, 1H), 7.96 – 7.88 (m, 1H), 7.71 – 7.62 (m, 3H), 2.94 (t,  $J = 7.3$  Hz, 2H), 1.82 (q,  $J = 7.4$  Hz, 2H), 1.04 (t,  $J = 7.4$  Hz, 3H).  $^{13}\text{C}$  NMR (126 MHz,  $\text{CDCl}_3$ )  $\delta$  204.02, 192.02, 141.32, 135.88, 133.14, 131.37, 129.93, 127.83, 43.29, 17.69, 13.76. HRMS (APCI)  $m/z$ : calculated for  $[\text{C}_{11}\text{H}_{12}\text{O}_2+\text{Na}]^+$  199.0729, found 199.0732.

### 2-octanoylbenzaldehyde (1d')

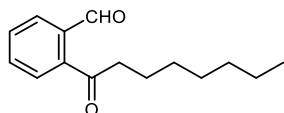

$^1\text{H}$  NMR (500 MHz,  $\text{CDCl}_3$ )  $^1\text{H}$  NMR (500 MHz, Chloroform-*d*)  $\delta$  10.16 (s, 1H), 7.91 – 7.86 (m, 1H), 7.68 – 7.59 (m, 3H), 2.93 (t,  $J = 7.4$  Hz, 2H), 1.76 (p,  $J = 7.4$  Hz, 2H), 1.45 – 1.23 (m, 8H), 0.89 (t,  $J = 6.7$  Hz, 3H).  $^{13}\text{C}$  NMR (126 MHz,  $\text{CDCl}_3$ )  $\delta$  204.12, 191.97, 141.35, 135.89, 133.12, 131.35, 129.90, 127.82, 41.45, 31.68, 29.20, 29.10, 24.27, 22.61, 14.08. HRMS (APCI)  $m/z$ : calculated for  $[\text{C}_{15}\text{H}_{20}\text{O}_2+\text{Na}]^+$  255.1355, found 255.1366.

### Synthesis of 2-(phenylsulfonyl)-1*H*-indol-1-amine

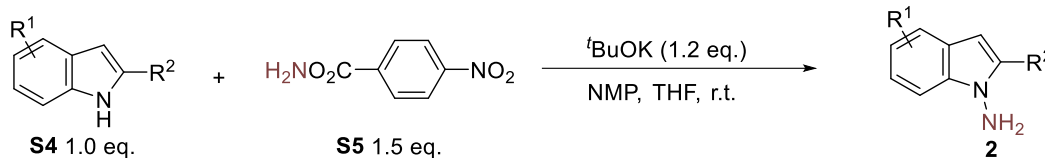

The 2-(phenylsulfonyl)-1*H*-indole were synthesized according to the literature<sup>[2]</sup> with the modifications. The 2-(phenylsulfonyl)-1*H*-indol-1-amine were synthesized according to the literature<sup>[3]</sup> with the modifications.

**Procedure 3:** To a stirred solution of the **S4** (10 mmol, 1.0 eq.) in 50 mL *N*-methylpyrrolidone (NMP) was added 12 mL *t*BuOK (1M in THF) and the reaction mixture was stirred at rt for 0.5 h. Then, a solution of **S5** (15 mmol, 1.5 eq.) was added to the mixture, which was stirred at rt for 2 h. After the completion of the reaction which was indicated by TLC, the reaction mixture was quenched with brine and the aqueous layer was extracted with EtOAc (3×20 mL). The combined organic layers were dried over anhydrous  $\text{Na}_2\text{SO}_4$  and then concentrated under reduced pressure. The crude product was purified by column chromatography over silica gel (PE: EA= 4:1) to afford the desired product.

### 3-methyl-2-(phenylsulfonyl)-1*H*-indol-1-amine (2b)

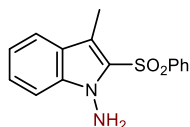

$^1\text{H}$  NMR (500 MHz,  $\text{CDCl}_3$ )  $^1\text{H}$  NMR (500 MHz, Chloroform-*d*)  $\delta$  7.98 – 7.93 (m, 2H), 7.64 (dt,  $J = 8.2, 0.9$  Hz, 1H), 7.62 – 7.55 (m, 1H), 7.55 – 7.48 (m, 3H), 7.41 – 7.33 (m, 1H), 7.16 (ddd,  $J = 8.0, 6.9, 1.0$  Hz, 1H), 4.82 (s, 2H), 2.72 (s, 3H).  $^{13}\text{C}$  NMR (126 MHz,  $\text{CDCl}_3$ )  $\delta$  142.43, 138.63, 133.47, 129.47, 128.73, 126.90, 126.63, 124.05, 120.76, 120.54, 119.56, 110.46, 9.73. HRMS (APCI)  $m/z$ : calculated for  $[\text{C}_{15}\text{H}_{14}\text{N}_2\text{O}_2\text{S}+\text{H}]^+$  287.0848, found 287.0844.

#### 4-methyl-2-(phenylsulfonyl)-1H-indol-1-amine (2c)

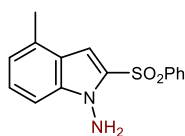

$^1\text{H}$  NMR (500 MHz,  $\text{CDCl}_3$ )  $\delta$  8.04 – 7.98 (m, 2H), 7.64 – 7.57 (m, 1H), 7.53 (dd,  $J$  = 8.5, 7.0 Hz, 2H), 7.42 (s, 1H), 7.38 (d,  $J$  = 8.5 Hz, 1H), 7.20 (dd,  $J$  = 8.6, 1.6 Hz, 1H), 7.17 (s, 1H), 4.77 (s, 2H), 2.43 (s, 3H).  $^{13}\text{C}$  NMR (126 MHz,  $\text{CDCl}_3$ )  $\delta$  138.03, 134.13, 133.60, 130.98, 129.40, 128.18, 127.86, 122.99, 121.84, 110.02, 107.94, 21.40. HRMS (APCI)  $m/z$ : calculated for  $[\text{C}_{15}\text{H}_{14}\text{N}_2\text{O}_2\text{S}+\text{Na}]^+$  309.0668 found 309.0677.

#### 4-methoxy-2-(phenylsulfonyl)-1H-indol-1-amine (2d)

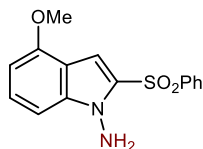

$^1\text{H}$  NMR (500 MHz,  $\text{CDCl}_3$ )  $\delta$  8.01 (dd,  $J$  = 8.4, 1.4 Hz, 2H), 7.63 – 7.57 (m, 1H), 7.53 (dd,  $J$  = 8.4, 7.0 Hz, 2H), 7.35 (s, 1H), 7.29 (d,  $J$  = 7.9 Hz, 1H), 7.08 (d,  $J$  = 8.4 Hz, 1H), 6.52 (d,  $J$  = 7.7 Hz, 1H), 4.81 (s, 2H), 3.94 (d,  $J$  = 1.2 Hz, 3H).  $^{13}\text{C}$  NMR (126 MHz,  $\text{CDCl}_3$ )  $\delta$  154.49, 141.16, 140.89, 133.59, 133.01, 129.39, 127.89, 127.31, 106.26, 103.11, 100.46, 55.48. HRMS (APCI)  $m/z$ : calculated for  $[\text{C}_{15}\text{H}_{14}\text{N}_2\text{O}_3\text{S}+\text{H}]^+$  303.0797, found 303.0792.

#### 4-fluoro-2-(phenylsulfonyl)-1H-indol-1-amine (2e)

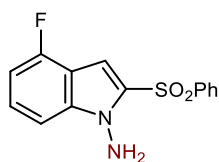

$^1\text{H}$  NMR (500 MHz,  $\text{CDCl}_3$ )  $\delta$  8.06 – 8.01 (m, 2H), 7.67 – 7.61 (m, 1H), 7.56 (dd,  $J$  = 8.5, 7.1 Hz, 2H), 7.31 – 7.24 (m, 3H), 6.82 (ddd,  $J$  = 9.9, 5.1, 3.3 Hz, 1H), 4.86 (s, 2H).  $^{13}\text{C}$  NMR (126 MHz,  $\text{CDCl}_3$ )  $\delta$  156.99 (d,  $J$  = 252.3 Hz), 141.54 (d,  $J$  = 9.5 Hz), 140.53, 134.91, 133.93, 129.51, 128.01, 126.75 (d,  $J$  = 7.9 Hz), 112.64 (d,  $J$  = 23.5 Hz), 106.48 (d,  $J$  = 4.1 Hz), 105.89 (d,  $J$  = 18.6 Hz), 104.28. HRMS (APCI)  $m/z$ : calculated for  $[\text{C}_{14}\text{H}_{11}\text{FN}_2\text{O}_2\text{S}+\text{Na}]^+$  313.0417, found 313.0427.

#### 5-methyl-2-(phenylsulfonyl)-1H-indol-1-amine (2f)

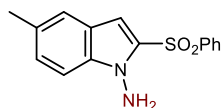

$^1\text{H}$  NMR (500 MHz,  $\text{CDCl}_3$ )  $\delta$  8.03 – 7.98 (m, 2H), 7.63 – 7.56 (m, 1H), 7.52 (dd,  $J$  = 8.4, 6.9 Hz, 2H), 7.41 (s, 1H), 7.38 (d,  $J$  = 8.6 Hz, 1H), 7.20 (dd,  $J$  = 8.7, 1.6 Hz, 1H), 7.16 (s, 1H), 4.77 (s, 2H), 2.42 (s, 3H).  $^{13}\text{C}$  NMR (126 MHz,  $\text{CDCl}_3$ )  $\delta$  141.11, 138.00, 134.12, 133.57, 130.94, 129.36, 128.15, 127.83, 122.96, 121.81, 109.99, 107.90, 21.37. HRMS (APCI)  $m/z$ : calculated for  $[\text{C}_{15}\text{H}_{14}\text{N}_2\text{O}_2\text{S}+\text{H}]^+$  287.0848, found 287.0845.

#### 5-methoxy-2-(phenylsulfonyl)-1H-indol-1-amine (2g)

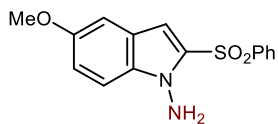

$^1\text{H}$  NMR (500 MHz,  $\text{CDCl}_3$ )  $\delta$  8.04 – 7.95 (m, 2H), 7.65 – 7.58 (m, 1H), 7.54 (dd,  $J = 8.5, 7.1$  Hz, 2H), 7.40 (d,  $J = 9.0$  Hz, 1H), 7.17 (s, 1H), 7.05 (dd,  $J = 9.0, 2.4$  Hz, 1H), 7.02 (d,  $J = 2.3$  Hz, 1H), 4.79 (s, 2H), 3.83 (s, 3H).  $^{13}\text{C}$  NMR (126 MHz,  $\text{CDCl}_3$ )  $\delta$  155.23, 134.95, 134.15, 133.60, 129.41, 127.79, 122.97, 117.97, 111.40, 107.73, 102.37, 55.74. HRMS (APCI)  $m/z$ : calculated for  $[\text{C}_{15}\text{H}_{14}\text{N}_2\text{O}_3\text{S}+\text{H}]^+$  303.0797, found 303.0788.

#### 5-fluoro-2-(phenylsulfonyl)-1H-indol-1-amine (2h)

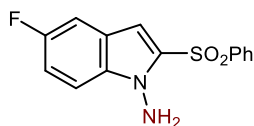

$^1\text{H}$  NMR (500 MHz,  $\text{CDCl}_3$ )  $\delta$  8.04 – 7.99 (m, 2H), 7.63 (t,  $J = 7.4$  Hz, 1H), 7.55 (dd,  $J = 8.5, 6.9$  Hz, 2H), 7.45 (dd,  $J = 9.1, 4.4$  Hz, 1H), 7.30 – 7.24 (m, 1H), 7.16 (s, 1H), 7.13 (td,  $J = 9.1, 2.5$  Hz, 1H), 4.84 (s, 2H).  $^{13}\text{C}$  NMR (126 MHz,  $\text{CDCl}_3$ )  $\delta$  158.46 (d,  $J = 238.1$  Hz), 140.66, 136.14, 135.68, 133.87, 129.50, 127.92, 122.62 (d,  $J = 10.5$  Hz), 115.39 (d,  $J = 27.1$  Hz), 111.69 (d,  $J = 9.4$  Hz), 107.77 (d,  $J = 5.2$  Hz), 106.83 (d,  $J = 23.8$  Hz).  $^{19}\text{F}$  NMR (471 MHz,  $\text{CDCl}_3$ )  $\delta$  -121.69. HRMS (APCI)  $m/z$ : calculated for  $[\text{C}_{14}\text{H}_{11}\text{FN}_2\text{O}_2\text{S}+\text{Na}]^+$  313.0417, found 313.0439.

#### 5-bromo-2-(phenylsulfonyl)-1H-indol-1-amine (2i)

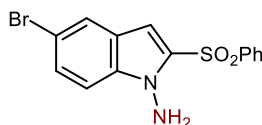

$^1\text{H}$  NMR (500 MHz,  $\text{CDCl}_3$ )  $\delta$  8.04 – 7.96 (m, 2H), 7.78 (d,  $J = 1.8$  Hz, 1H), 7.68 – 7.61 (m, 1H), 7.57 (dd,  $J = 8.6, 7.2$  Hz, 2H), 7.45 (dd,  $J = 8.9, 1.8$  Hz, 1H), 7.40 (d,  $J = 8.8$  Hz, 1H), 7.15 (s, 1H), 4.83 (s, 2H).  $^{13}\text{C}$  NMR (126 MHz,  $\text{CDCl}_3$ )  $\delta$  140.56, 138.09, 135.48, 133.95, 129.55, 129.22, 127.93, 124.88, 124.02, 114.61, 112.11, 107.38. HRMS (APCI)  $m/z$ : calculated for  $[\text{C}_{14}\text{H}_{11}\text{BrN}_2\text{O}_2\text{S}+\text{Na}]^+$  372.9616, found 374.9605.

#### 5-iodo-2-(phenylsulfonyl)-1H-indol-1-amine (2j)

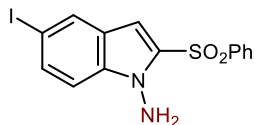

$^1\text{H}$  NMR (500 MHz,  $\text{CDCl}_3$ )  $\delta$  8.04 – 7.91 (m, 3H), 7.67 – 7.62 (m, 1H), 7.61 (dd,  $J = 8.8, 1.6$  Hz, 1H), 7.56 (dd,  $J = 8.5, 7.1$  Hz, 2H), 7.30 (d,  $J = 8.8$  Hz, 1H), 7.14 (d,  $J = 0.8$  Hz, 1H), 4.82 (s, 2H).  $^{13}\text{C}$  NMR (126 MHz,  $\text{CDCl}_3$ )  $\delta$  140.55, 138.51, 135.10, 134.50, 133.95, 131.26, 129.54, 127.91, 124.87, 112.46, 107.12, 84.79. HRMS (APCI)  $m/z$ : calculated for  $[\text{C}_{14}\text{H}_{11}\text{IN}_2\text{O}_2\text{S}+\text{Na}]^+$  420.9478, found 420.9475.

#### 5-phenyl-2-(phenylsulfonyl)-1H-indol-1-amine (2k)

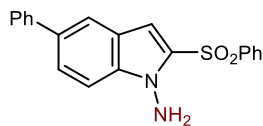

$^1\text{H}$  NMR (500 MHz,  $\text{CDCl}_3$ )  $\delta$  8.04 (dd,  $J = 8.4, 1.3$  Hz, 2H), 7.84 (d,  $J = 1.6$  Hz, 1H), 7.66 – 7.61 (m, 4H), 7.60 – 7.53 (m, 5H), 7.44 (t,  $J = 7.7$  Hz, 2H), 7.37 – 7.31 (m, 1H), 7.30 (s, 1H), 4.84 (s, 2H).  $^{13}\text{C}$  NMR (126 MHz,  $\text{CDCl}_3$ )  $\delta$  141.44, 140.92, 138.97, 135.16, 134.91, 133.74, 129.46, 128.81, 127.89, 127.33, 126.93, 126.22, 123.17, 120.81, 110.69, 108.70. HRMS (APCI)  $m/z$ : calculated for  $[\text{C}_{20}\text{H}_{16}\text{N}_2\text{O}_2\text{S}+\text{H}]^+$  349.1005, found 349.1005.

#### 6-methyl-2-(phenylsulfonyl)-1H-indol-1-amine (2l)

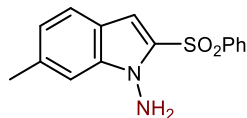

$^1\text{H}$  NMR (500 MHz,  $\text{CDCl}_3$ )  $\delta$  8.04 – 7.98 (m, 2H), 7.60 (td,  $J = 7.2, 1.5$  Hz, 1H), 7.53 (td,  $J = 8.0, 7.6, 1.9$  Hz, 3H), 7.29 (s, 1H), 7.21 (s, 1H), 7.00 (dd,  $J = 8.2, 1.6$  Hz, 1H), 4.76 (s, 2H), 2.47 (s, 3H).  $^{13}\text{C}$  NMR (126 MHz,  $\text{CDCl}_3$ )  $\delta$  141.18, 139.93, 136.67, 133.54, 129.37, 127.79, 123.64, 122.24, 120.69, 109.86, 108.56, 22.10. HRMS (APCI)  $m/z$ : calculated for  $[\text{C}_{15}\text{H}_{14}\text{N}_2\text{O}_2\text{S}+\text{Na}]^+$  309.0668, found 309.0693.

#### 6-methoxy-2-(phenylsulfonyl)-1H-indol-1-amine (2m)

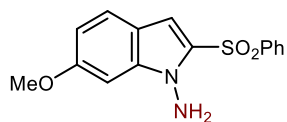

$^1\text{H}$  NMR (500 MHz,  $\text{CDCl}_3$ )  $\delta$  7.99 (dt,  $J = 7.2, 1.3$  Hz, 2H), 7.63 – 7.57 (m, 1H), 7.56 – 7.46 (m, 3H), 7.21 – 7.18 (m, 1H), 6.90 (d,  $J = 2.3$  Hz, 1H), 6.81 (dd,  $J = 8.8, 2.3$  Hz, 1H), 4.78 (s, 2H), 3.85 (s, 3H).  $^{13}\text{C}$  NMR (126 MHz,  $\text{CDCl}_3$ )  $\delta$  159.54, 141.36, 140.84, 133.48, 132.53, 129.42, 127.63, 123.49, 116.94, 113.45, 109.18, 91.85, 55.56. HRMS (APCI)  $m/z$ : calculated for  $[\text{C}_{15}\text{H}_{14}\text{N}_2\text{O}_3\text{S}+\text{Na}]^+$  325.0617, found 325.0627.

#### 2-tosyl-1H-indol-1-amine (2n)

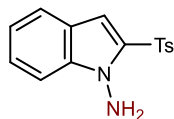

$^1\text{H}$  NMR (500 MHz,  $\text{CDCl}_3$ )  $\delta$  7.89 – 7.84 (m, 2H), 7.62 – 7.56 (m, 1H), 7.38 (dd,  $J = 8.5, 1.1$  Hz, 1H), 7.33 (d,  $J = 8.2$  Hz, 2H), 7.25 (ddd,  $J = 8.3, 6.9, 1.1$  Hz, 1H), 7.08 (d,  $J = 0.9$  Hz, 1H), 7.05 (ddd,  $J = 7.9, 6.8, 1.0$  Hz, 1H), 5.87 (s, 2H), 2.28 (s, 3H).  $^{13}\text{C}$  NMR (126 MHz,  $\text{CDCl}_3$ )  $\delta$  144.63, 139.33, 138.57, 136.36, 130.12, 128.72, 125.48, 122.91, 122.73, 121.39, 111.37, 106.13, 21.54. HRMS (APCI)  $m/z$ : calculated for  $[\text{C}_{15}\text{H}_{14}\text{N}_2\text{O}_2\text{S}+\text{Na}]^+$  309.0668, found 309.0676.

#### 2-((4-fluorophenyl)sulfonyl)-1H-indol-1-amine (2o)

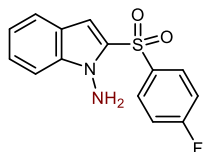

$^1\text{H}$  NMR (500 MHz,  $\text{DMSO-}d_6$ )  $\delta$  8.09 – 8.02 (m, 2H), 7.65 (d,  $J$  = 8.1 Hz, 1H), 7.48 (d,  $J$  = 8.4 Hz, 1H), 7.38 (ddd,  $J$  = 8.3, 6.9, 1.1 Hz, 1H), 7.23 – 7.15 (m, 4H), 4.80 (s, 2H).  $^{13}\text{C}$  NMR (126 MHz,  $\text{DMSO-}d_6$ )  $\delta$  165.68 (d,  $J$  = 257.0 Hz), 139.42, 137.01 (d,  $J$  = 3.2 Hz), 134.43, 130.96 (d,  $J$  = 9.6 Hz), 126.26, 122.77, 122.70, 121.62, 116.63 (d,  $J$  = 22.7 Hz), 110.12, 108.31.  $^{19}\text{F}$  NMR (471 MHz,  $\text{CDCl}_3$ )  $\delta$  -103.25. HRMS (APCI)  $m/z$ : calculated for  $[\text{C}_{14}\text{H}_{11}\text{FN}_2\text{O}_2\text{S}+\text{Na}]^+$  313.0417, found 313.0434.

**(1*R*,2*S*,5*R*)-2-isopropyl-5-methylcyclohexyl 1-amino-1*H*-indole-2-carboxylate (2r)**

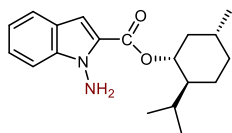

$^1\text{H}$  NMR (500 MHz,  $\text{CDCl}_3$ )  $\delta$  7.62 (t,  $J$  = 7.6 Hz, 2H), 7.34 (dd,  $J$  = 8.6, 6.8 Hz, 1H), 7.17 (s, 1H), 7.12 (t,  $J$  = 7.7 Hz, 1H), 5.35 (d,  $J$  = 2.0 Hz, 2H), 4.94 (td,  $J$  = 10.9, 4.3 Hz, 1H), 2.16 – 2.10 (m, 1H), 1.99 (pd,  $J$  = 6.9, 2.4 Hz, 1H), 1.74 (dt,  $J$  = 14.7, 3.8 Hz, 2H), 1.63 – 1.52 (m, 2H), 1.20 – 1.09 (m, 2H), 0.94 (dd,  $J$  = 7.6, 5.7 Hz, 7H), 0.82 (dd,  $J$  = 6.9, 2.0 Hz, 3H).  $^{13}\text{C}$  NMR (126 MHz,  $\text{CDCl}_3$ )  $\delta$  162.20, 139.30, 126.52, 125.35, 123.03, 122.20, 120.78, 110.80, 107.75, 74.72, 47.27, 41.08, 34.29, 31.53, 26.61, 23.75, 22.07, 20.74, 16.64. HRMS (APCI)  $m/z$ : calculated for  $[\text{C}_{19}\text{H}_{26}\text{N}_2\text{O}_2+\text{H}]^+$  315.2067, found 315.2075.

**2-(trifluoromethyl)-1*H*-benzo[*d*]imidazol-1-amine (2s)**

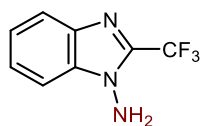

$^1\text{H}$  NMR (500 MHz,  $\text{CDCl}_3$ )  $\delta$  7.84 (d,  $J$  = 8.1 Hz, 1H), 7.55 (d,  $J$  = 8.1 Hz, 1H), 7.50 – 7.44 (m, 1H), 7.42 – 7.35 (m, 1H), 4.94 (s, 2H).  $^{13}\text{C}$  NMR (126 MHz,  $\text{CDCl}_3$ )  $\delta$  140.77, 138.82, 136.01, 125.73, 123.96, 121.73, 118.76 (d,  $J$  = 271.5 Hz), 109.65.  $^{19}\text{F}$  NMR (471 MHz,  $\text{CDCl}_3$ )  $\delta$  -62.91. HRMS (APCI)  $m/z$ : calculated for  $[\text{C}_8\text{H}_6\text{F}_3\text{N}_3+\text{H}]^+$  202.0586, found 202.0579.

**General procedure for synthesis of products 3**

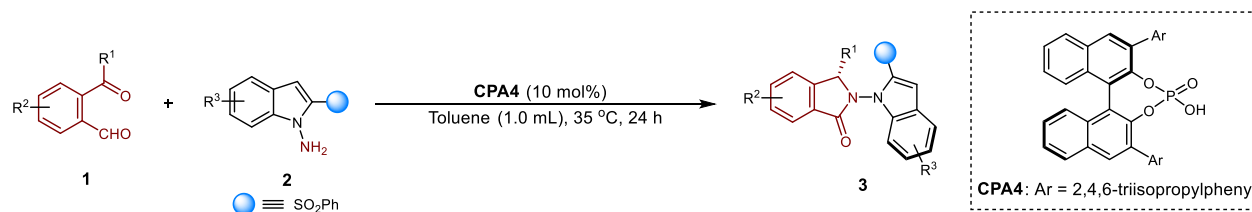

**Procedure 4:** To a 4 mL vial equipped with a stirring bar was added **1** (0.2 mmol, 1.0 eq.), **2** (0.1 mmol, 1.0 eq.) and toluene (1 mL). **CPA4** (0.01 mmol, 0.1 eq.) was then added to the vial and the reaction mixture was stirred at 35 °C for 24 h. After the completion of the reaction which was indicated by TLC, the crude product was purified by column chromatography on silica gel (PE/EA as the eluent) and the desired product was afforded.

## General procedure for synthesis of products 4a/5a

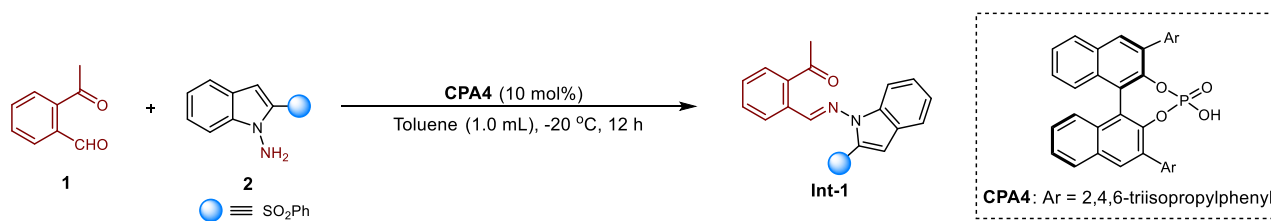

**Procedure 5:** To a test tube equipped with a stirring bar was added **1** (0.2 mmol, 1.0 eq.), **2** (0.1 mmol, 1.0 eq.) and **CPA4** (0.01 mmol, 0.1 eq.). Toluene (1 mL) was then added to the vial and the reaction mixture was stirred at  $-20\text{ }^{\circ}\text{C}$  for 12 h. After the completion of the reaction which was indicated by TLC, the crude product was purified by column chromatography on silica gel (PE/EA as the eluent) and the desired product was afforded.

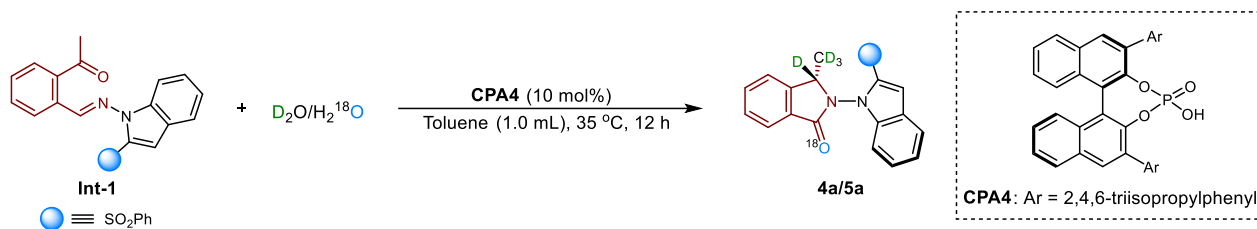

**Procedure 6:** The reaction was proceeded in the glovebox under argon atmosphere. To a 4 mL dry vial equipped with a stirring bar was added **Int-1** (0.01 mmol, 0.1 eq.), **CPA4** (0.01 mmol, 0.1 eq.) and dry toluene (1 mL). The 50  $\mu\text{L}$  of deuterium oxide ( $\text{D}_2\text{O}$ ) or heavy-oxygen water ( $\text{H}_2^{18}\text{O}$ ) was then added to the flask and the reaction mixture was stirred at  $35\text{ }^{\circ}\text{C}$  for 12 h. After the completion of the reaction which was indicated by TLC, the crude product was purified by column chromatography on silica gel (PE/EA as the eluent) and the desired product was afforded.

## Products characterization for chiral isoindolinones

### (*S*)-3-methyl-2-(2-(phenylsulfonyl)-1*H*-indol-1-yl)isoindolin-1-one (**3a**)

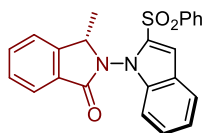

Following the **Procedure 4**, **3a** was obtained as faint yellow solid (36.6 mg, 91% yield).  $^1\text{H}$  NMR (500 MHz,  $\text{CDCl}_3$ )  $\delta$  7.96 (dd,  $J = 7.6, 1.6$  Hz, 2H), 7.85 (d,  $J = 7.6$  Hz, 1H), 7.74 – 7.66 (m, 2H), 7.54 (td,  $J = 7.4, 1.9$  Hz, 2H), 7.50 (d,  $J = 7.5$  Hz, 1H), 7.47 – 7.40 (m, 3H), 7.30 (ddd,  $J = 8.4, 7.0, 1.2$  Hz, 1H), 7.22 (t,  $J = 7.7$  Hz, 1H), 6.94 (d,  $J = 8.3$  Hz, 1H), 5.13 (q,  $J = 6.8$  Hz, 1H), 1.65 (d,  $J = 6.9$  Hz, 3H).  $^{13}\text{C}$  NMR (126 MHz,  $\text{CDCl}_3$ )  $\delta$  166.66, 145.64, 140.83, 138.13, 136.75, 133.59, 133.39, 128.97, 128.74, 128.47, 128.32, 127.00, 124.53, 124.19, 123.49, 122.77, 122.65, 112.33, 110.04, 58.12, 17.41. HPLC (Chiralpak IC column, 80:20 hexanes/isopropanol, 1 mL/min),  $t_r = 35.670$  min (minor), 42.083 min (major); ee = 95%. HRMS (ESI)  $m/z$ : calculated for  $[\text{C}_{23}\text{H}_{18}\text{N}_2\text{O}_3\text{S}+\text{Na}]^+$  425.0930, found 425.0943.

### (*S*)-3-methyl-2-(3-methyl-2-(phenylsulfonyl)-1*H*-indol-1-yl)isoindolin-1-one (**3b**)



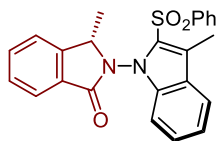

Following the general **Procedure 4**, **3b** was obtained as faint yellow solid (33.3 mg, 80% yield).  $^1\text{H}$  NMR (500 MHz,  $\text{CDCl}_3$ )  $\delta$  8.17 (dd,  $J = 7.4, 1.9$  Hz, 2H), 7.98 (d,  $J = 7.6$  Hz, 1H), 7.68 (dd,  $J = 8.3, 6.6$  Hz, 2H), 7.59 – 7.51 (m, 2H), 7.51 – 7.44 (m, 3H), 7.35 (ddd,  $J = 8.3, 7.0, 1.1$  Hz, 1H), 7.23 (t,  $J = 8.0$  Hz, 1H), 7.04 (d,  $J = 8.3$  Hz, 1H), 5.06 (q,  $J = 6.7$  Hz, 1H), 2.55 (s, 3H), 1.60 (d,  $J = 6.8$  Hz, 3H).  $^{13}\text{C}$  NMR (126 MHz,  $\text{CDCl}_3$ )  $\delta$  166.75, 145.56, 142.14, 137.51, 133.28, 133.05, 130.90, 129.01, 128.94, 128.62, 127.73, 127.44, 125.72, 124.65, 122.47, 122.29, 122.16, 121.22, 110.16, 57.56, 17.00, 10.03. HPLC (Chiralpak IC column, 80:20 hexanes/isopropanol, 1 mL/min),  $t_r = 21.467$  min (minor), 38.017 min (major); ee = 86%. HRMS (ESI)  $m/z$ : calculated for  $[\text{C}_{24}\text{H}_{20}\text{N}_2\text{O}_3\text{S}+\text{H}]^+$  417.1267, found 417.1259.

**(S)-3-methyl-2-(4-methyl-2-(phenylsulfonyl)-1H-indol-1-yl)isoindolin-1-one (3c)**

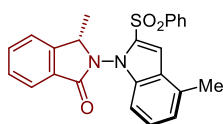

Following the **Procedure 4**, **3c** was obtained as faint yellow solid (27.4 mg, 66% yield).  $^1\text{H}$  NMR (500 MHz,  $\text{CDCl}_3$ )  $\delta$  7.99 – 7.94 (m, 2H), 7.83 (d,  $J = 7.6$  Hz, 1H), 7.68 (td,  $J = 7.6, 1.1$  Hz, 1H), 7.57 – 7.47 (m, 4H), 7.43 (t,  $J = 7.7$  Hz, 2H), 7.19 (dd,  $J = 8.4, 7.2$  Hz, 1H), 7.01 (d,  $J = 7.2$  Hz, 1H), 6.74 (d,  $J = 8.3$  Hz, 1H), 5.13 (q,  $J = 6.8$  Hz, 1H), 2.57 (s, 3H), 1.65 (d,  $J = 6.8$  Hz, 3H).  $^{13}\text{C}$  NMR (126 MHz,  $\text{CDCl}_3$ )  $\delta$  166.75, 145.70, 140.90, 138.09, 136.05, 133.58, 133.44 (d,  $J = 3.9$  Hz), 129.01, 128.75, 128.50, 128.33, 127.28, 124.53, 124.28, 122.89, 122.69, 111.02, 107.54, 58.16, 18.27, 17.46, 1.12. HPLC (Chiralpak IC column, 80:20 hexanes/isopropanol, 1 mL/min),  $t_r = 31.693$  min (minor), 36.210 min (major); ee = 94%. HRMS (ESI)  $m/z$ : calculated for  $[\text{C}_{24}\text{H}_{20}\text{N}_2\text{O}_3\text{S}+\text{H}]^+$  417.1267, found 417.1255.

**(S)-2-(4-methoxy-2-(phenylsulfonyl)-1H-indol-1-yl)-3-methylisoindolin-1-one (3d)**

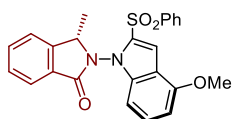

Following the **Procedure 4**, **3d** was obtained as faint yellow solid (32.4 mg, 75% yield).  $^1\text{H}$  NMR (500 MHz,  $\text{CDCl}_3$ )  $\delta$  7.98 – 7.90 (m, 2H), 7.85 (d,  $J = 7.6$  Hz, 1H), 7.67 (td,  $J = 7.6, 1.1$  Hz, 1H), 7.56 (s, 1H), 7.52 (t,  $J = 7.9$  Hz, 2H), 7.48 (d,  $J = 7.6$  Hz, 1H), 7.42 (t,  $J = 7.7$  Hz, 2H), 7.20 (t,  $J = 8.1$  Hz, 1H), 6.56 (d,  $J = 7.9$  Hz, 1H), 6.51 (d,  $J = 8.4$  Hz, 1H), 5.10 (q,  $J = 6.7$  Hz, 1H), 3.92 (s, 3H), 1.63 (d,  $J = 6.8$  Hz, 3H).  $^{13}\text{C}$  NMR (126 MHz,  $\text{CDCl}_3$ )  $\delta$  166.63, 155.07, 145.68, 141.13, 139.55, 135.17, 133.50, 133.39, 128.97, 128.73, 128.54, 128.40, 128.27, 124.53, 122.68, 115.56, 110.17, 102.68, 102.09, 58.07, 55.66, 17.36. HPLC (Chiralpak IC column, 80:20 hexanes/isopropanol, 1 mL/min),  $t_r = 46.300$  min (minor), 53.200 min (major); ee = 94%. HRMS (ESI)  $m/z$ : calculated for  $[\text{C}_{24}\text{H}_{20}\text{N}_2\text{O}_4\text{S}+\text{Na}]^+$  455.1036, found 455.1048.

**(S)-2-(4-fluoro-2-(phenylsulfonyl)-1H-indol-1-yl)-3-methylisoindolin-1-one (3e)**

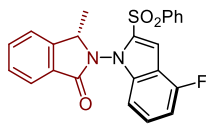

Following the **Procedure 4**, **3e** was obtained as faint yellow solid (26.0 mg, 62% yield).  $^1\text{H}$  NMR (500 MHz,  $\text{CDCl}_3$ )  $\delta$  8.00 – 7.93 (m, 2H), 7.85 (d,  $J = 7.6$  Hz, 1H), 7.73 (t,  $J = 7.5$  Hz, 1H), 7.62 – 7.53 (m, 2H), 7.53 (d,  $J = 8.8$  Hz, 2H), 7.47 (t,  $J = 7.7$  Hz, 2H), 7.23 (dd,  $J = 8.1, 4.9$  Hz, 1H), 6.90 (dd,  $J = 9.7, 7.9$  Hz, 1H), 6.73 (d,  $J = 8.4$  Hz, 1H), 5.14 (q,  $J = 6.8$  Hz, 1H), 1.69 (d,  $J = 6.8$  Hz, 3H).  $^{13}\text{C}$  NMR (126 MHz,  $\text{CDCl}_3$ )  $\delta$  166.62, 157.47 (d,  $J = 253.9$  Hz), 145.60, 140.48, 140.01 (d,  $J = 9.5$  Hz), 137.28, 133.82, 133.56, 129.06, 128.85, 128.45, 128.27, 127.83 (d,  $J = 7.7$  Hz), 124.62, 122.67, 114.07 (d,  $J = 23.6$  Hz), 107.99, 107.51 (d,  $J = 18.6$  Hz), 106.03 (d,  $J = 4.3$  Hz), 58.22, 17.45.  $^{19}\text{F}$  NMR (470 MHz,  $\text{CDCl}_3$ )  $\delta$  -119.16 (dd,  $J = 9.7, 5.0$  Hz). HPLC (Chiralpak IC column, 80:20 hexanes/isopropanol, 1 mL/min),  $t_r = 20.297$  min (minor), 24.937 min (major); ee = 94%. HRMS (ESI)  $m/z$ : calculated for  $[\text{C}_{23}\text{H}_{17}\text{FN}_2\text{O}_3\text{S}+\text{H}]^+$  421.1016, found 421.0999.

**(S)-3-methyl-2-(5-methyl-2-(phenylsulfonyl)-1H-indol-1-yl)isoindolin-1-one (3f)**

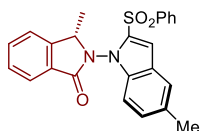

Following the **Procedure 4**, **3f** was obtained as faint yellow solid (31.2 mg, 75% yield).  $^1\text{H}$  NMR (500 MHz,  $\text{CDCl}_3$ )  $\delta$  7.95 (dd,  $J = 7.5, 1.7$  Hz, 2H), 7.84 (d,  $J = 7.6$  Hz, 1H), 7.70 – 7.66 (m, 1H), 7.53 (t,  $J = 7.4$  Hz, 2H), 7.51 – 7.47 (m, 2H), 7.42 (t,  $J = 7.7$  Hz, 2H), 7.37 (s, 1H), 7.12 (dd,  $J = 8.5, 1.6$  Hz, 1H), 6.83 (d,  $J = 8.5$  Hz, 1H), 5.10 (q,  $J = 6.8$  Hz, 1H), 2.40 (s, 3H), 1.62 (d,  $J = 6.8$  Hz, 3H).  $^{13}\text{C}$  NMR (126 MHz,  $\text{CDCl}_3$ )  $\delta$  166.66, 145.67, 141.00, 136.66, 136.60, 133.55, 133.37, 132.41, 128.97, 128.86, 128.74, 128.58, 128.29, 124.53, 124.48, 122.87, 122.67, 112.06, 109.80, 58.08, 21.39, 17.38. HPLC (Chiralpak IC column, 80:20 hexanes/isopropanol, 1 mL/min),  $t_r = 39.520$  min (minor), 51.073 min (major); ee = 95%. HRMS (ESI)  $m/z$ : calculated for  $[\text{C}_{24}\text{H}_{20}\text{N}_2\text{O}_3\text{S}+\text{H}]^+$  417.1267, found 417.1255.

**(S)-2-(5-methoxy-2-(phenylsulfonyl)-1H-indol-1-yl)-3-methylisoindolin-1-one (3g)**

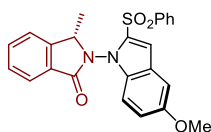

Following the **Procedure 4**, **3g** was obtained as faint yellow solid (39.3 mg, 91% yield).  $^1\text{H}$  NMR (500 MHz,  $\text{CDCl}_3$ )  $\delta$  7.99 – 7.91 (m, 2H), 7.84 (d,  $J = 7.6$  Hz, 1H), 7.67 (t,  $J = 7.5$  Hz, 1H), 7.52 (td,  $J = 7.5, 3.7$  Hz, 2H), 7.48 (d,  $J = 7.7$  Hz, 1H), 7.42 (t,  $J = 7.8$  Hz, 2H), 7.37 (s, 1H), 7.10 (d,  $J = 2.4$  Hz, 1H), 6.95 (dd,  $J = 9.0, 2.4$  Hz, 1H), 6.84 (d,  $J = 9.0$  Hz, 1H), 5.09 (q,  $J = 6.8$  Hz, 1H), 3.79 (s, 3H), 1.63 (d,  $J = 6.8$  Hz, 3H).  $^{13}\text{C}$  NMR (126 MHz,  $\text{CDCl}_3$ )  $\delta$  166.68, 156.14, 145.64, 141.00, 136.87, 133.56, 133.40, 133.36, 128.98, 128.76, 128.50, 128.27, 124.78, 124.51, 122.68, 118.33, 111.94, 111.06, 103.81, 58.22, 55.86, 17.38. HPLC (Chiralpak IC column, 70:30 hexanes/isopropanol, 1 mL/min),  $t_r = 30.660$  min (minor), 45.857 min (major); ee = 94%. HRMS (ESI)  $m/z$ : calculated for  $[\text{C}_{24}\text{H}_{20}\text{N}_2\text{O}_4\text{S}+\text{H}]^+$  433.1216, found 433.1201.

**(S)-2-(5-fluoro-2-(phenylsulfonyl)-1H-indol-1-yl)-3-methylisoindolin-1-one (3h)**

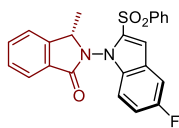

Following the **Procedure 4**, **3h** was obtained as faint yellow solid (27.7 mg, 66% yield).  $^1\text{H}$  NMR (500 MHz,  $\text{CDCl}_3$ )  $\delta$  7.95 (d,  $J = 7.8$  Hz, 2H), 7.83 (d,  $J = 7.6$  Hz, 1H), 7.69 (t,  $J = 7.5$  Hz, 1H), 7.55 (dt,  $J = 10.1, 7.5$  Hz, 2H), 7.50 (d,  $J = 7.6$  Hz, 1H), 7.44 (t,  $J = 7.7$  Hz, 2H), 7.39 (s, 1H), 7.36 (dd,  $J = 8.7, 2.5$  Hz, 1H), 7.04 (td,  $J = 9.0, 2.5$  Hz, 1H), 6.88 (dd,  $J = 9.0, 4.1$  Hz, 1H), 5.10 (q,  $J = 6.8$  Hz, 1H), 1.65 (d,  $J = 6.8$  Hz, 3H).  $^{13}\text{C}$  NMR (126 MHz,  $\text{CDCl}_3$ )  $\delta$  166.76, 165.71 (d,  $J = 256.0$  Hz), 145.65, 138.18, 136.96 (d,  $J = 3.1$  Hz), 136.54, 133.50, 131.28 (d,  $J = 9.7$  Hz), 128.83, 128.37, 127.18, 124.51, 124.16, 123.53, 122.88, 122.70, 116.27 (d,  $J = 22.7$  Hz), 112.47, 110.06, 58.12, 17.40. HPLC (Chiralpak AD column, 80:20 hexanes/isopropanol, 1 mL/min),  $t_r = 40.040$  min (major), 50.857 min (minor); ee = 96%. HRMS (ESI)  $m/z$ : calculated for  $[\text{C}_{23}\text{H}_{17}\text{FN}_2\text{O}_3\text{S}+\text{H}]^+$  421.1016, found 421.0997.

**(S)-2-(5-bromo-2-(phenylsulfonyl)-1H-indol-1-yl)-3-methylisoindolin-1-one (3i)**

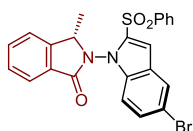

Following the **Procedure 4**, **3i** was obtained as faint yellow solid (38.9.7 mg, 81% yield).  $^1\text{H}$  NMR (500 MHz,  $\text{CDCl}_3$ )  $\delta$  7.96 – 7.91 (m, 2H), 7.84 (d,  $J = 1.8$  Hz, 1H), 7.82 (d,  $J = 7.6$  Hz, 1H), 7.72 – 7.67 (m, 1H), 7.54 (dt,  $J = 9.7, 7.5$  Hz, 2H), 7.50 (d,  $J = 7.5$  Hz, 1H), 7.43 (t,  $J = 7.8$  Hz, 2H), 7.36 (s, 1H), 7.34 (dd,  $J = 8.8, 1.8$  Hz, 1H), 6.81 (d,  $J = 8.8$  Hz, 1H), 5.09 (q,  $J = 6.8$  Hz, 1H), 1.65 (d,  $J = 6.8$  Hz, 3H).  $^{13}\text{C}$  NMR (126 MHz,  $\text{CDCl}_3$ )  $\delta$  166.61, 145.55, 140.43, 138.06, 136.70, 133.88, 133.61, 129.93, 129.08, 128.89, 128.43, 128.21, 125.89, 125.66, 124.58, 122.75, 115.88, 111.59, 111.19, 58.32, 17.45. HPLC (Chiralpak AD column, 70:30 hexanes/isopropanol, 1 mL/min),  $t_r = 35.100$  min (major), 40.730 min (minor); ee = 95%. HRMS (ESI)  $m/z$ : calculated for  $[\text{C}_{23}\text{H}_{17}\text{BrN}_2\text{O}_3\text{S}+\text{H}]^+$  481.02160, found 481.0206.

**(S)-2-(5-iodo-2-(phenylsulfonyl)-1H-indol-1-yl)-3-methylisoindolin-1-one (3j)**

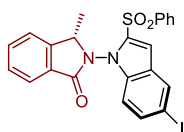

Following the **Procedure 4**, **3j** was obtained as faint yellow solid (32.2 mg, 61% yield).  $^1\text{H}$  NMR (500 MHz,  $\text{CDCl}_3$ )  $\delta$  8.06 (s, 1H), 7.93 (d,  $J = 7.8$  Hz, 2H), 7.82 (d,  $J = 7.7$  Hz, 1H), 7.71 (t,  $J = 7.6$  Hz, 1H), 7.55 (q,  $J = 7.8$  Hz, 2H), 7.54 – 7.48 (m, 2H), 7.44 (t,  $J = 7.7$  Hz, 2H), 7.36 (s, 1H), 6.72 (d,  $J = 8.7$  Hz, 1H), 5.09 (q,  $J = 6.8$  Hz, 1H), 1.66 (d,  $J = 6.8$  Hz, 3H).  $^{13}\text{C}$  NMR (126 MHz,  $\text{CDCl}_3$ )  $\delta$  166.58, 145.55, 140.45 (d,  $J = 2.9$  Hz), 137.69, 137.19, 135.26, 133.85, 133.58, 132.18, 129.07, 128.88, 128.42, 128.23, 126.40, 124.59, 122.72, 111.91, 110.91, 86.12, 58.30, 17.44. HPLC (Chiralpak AD column, 70:30 hexanes/isopropanol, 1 mL/min),  $t_r = 35.940$  min (major), 49.160 min (minor); ee = 92%. HRMS (ESI)  $m/z$ : calculated for  $[\text{C}_{23}\text{H}_{17}\text{IN}_2\text{O}_3\text{S}+\text{H}]^+$  529.0077, found 529.0062.

**(S)-3-methyl-2-(5-phenyl-2-(phenylsulfonyl)-1H-indol-1-yl)isoindolin-1-one (3k)**

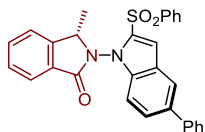

Following the **Procedure 4**, **3k** was obtained as faint yellow solid (33.5 mg, 70% yield).  $^1\text{H}$  NMR (500 MHz,  $\text{CDCl}_3$ )  $\delta$  8.02 (d,  $J = 7.8$  Hz, 2H), 7.96 – 7.92 (m, 1H), 7.90 (d,  $J = 7.6$  Hz, 1H), 7.73 (t,  $J = 7.5$  Hz, 1H), 7.58 (t,  $J = 5.5$  Hz, 4H), 7.55 (t,  $J = 6.0$  Hz, 3H), 7.47 (q,  $J = 7.8$  Hz, 4H), 7.36 (t,  $J = 7.5$  Hz, 1H), 7.04 (d,  $J = 8.7$  Hz, 1H), 5.20 (q,  $J = 6.5$  Hz, 1H), 1.72 (d,  $J = 6.8$  Hz, 3H).  $^{13}\text{C}$  NMR (126 MHz,  $\text{CDCl}_3$ )  $\delta$  166.75, 145.69, 141.13, 140.81, 137.61, 137.39, 136.57, 133.69, 133.50, 129.04, 128.93, 128.81, 128.45, 128.37, 127.45, 127.24, 126.98, 124.72, 124.55, 122.75, 121.78, 112.54, 110.39, 58.31, 17.48. HPLC (Chiralpak OD column, 80:20 hexanes/isopropanol, 1 mL/min),  $t_r = 12.567$  min (minor), 24.573 min (major); ee = 92%. HRMS (ESI)  $m/z$ : calculated for  $[\text{C}_{29}\text{H}_{22}\text{N}_2\text{O}_3\text{S}+\text{H}]^+$  501.1243, found 501.1244.

**(S)-3-methyl-2-(6-methyl-2-(phenylsulfonyl)-1H-indol-1-yl)isoindolin-1-one (3l)**

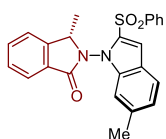

Following the **Procedure 4**, **3l** was obtained as faint yellow solid (25.8 mg, 62% yield).  $^1\text{H}$  NMR (500 MHz,  $\text{CDCl}_3$ )  $\delta$  7.98 – 7.93 (m, 2H), 7.87 (d,  $J = 7.6$  Hz, 1H), 7.71 (td,  $J = 7.5, 1.2$  Hz, 1H), 7.60 (d,  $J = 8.3$  Hz, 1H), 7.58 – 7.55 (m, 1H), 7.52 (dd,  $J = 8.3, 7.1$  Hz, 2H), 7.46 – 7.42 (m, 2H), 7.40 (d,  $J = 0.9$  Hz, 1H), 7.06 (dd,  $J = 8.3, 1.4$  Hz, 1H), 6.72 (s, 1H), 5.13 (q,  $J = 6.8$  Hz, 1H), 2.36 (s, 3H), 1.65 (d,  $J = 6.8$  Hz, 3H).  $^{13}\text{C}$  NMR (126 MHz,  $\text{CDCl}_3$ )  $\delta$  166.60, 145.64, 141.07, 138.64, 137.77, 135.87, 133.45, 133.31, 128.92, 128.70, 128.60, 128.21, 124.80, 124.57, 123.11, 122.64, 122.12, 112.56, 109.65, 57.97, 22.02, 17.33. HPLC (Chiralpak IC column, 80:20 hexanes/isopropanol, 1 mL/min),  $t_r = 37.603$  min (minor), 45.353 min (major); ee = 57%. HRMS (ESI)  $m/z$ : calculated for  $[\text{C}_{24}\text{H}_{20}\text{N}_2\text{O}_3\text{S}+\text{Na}]^+$  439.1086, found 439.1096.

**(S)-2-(6-methoxy-2-(phenylsulfonyl)-1H-indol-1-yl)-3-methylisoindolin-1-one (3m)**

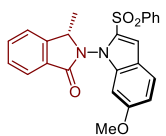

Following the **Procedure 4**, **3m** was obtained as faint yellow solid (27.2 mg, 63% yield).  $^1\text{H}$  NMR (500 MHz,  $\text{CDCl}_3$ )  $\delta$  7.59 (t,  $J = 8.3$  Hz, 2H), 7.53 (dd,  $J = 10.3, 7.5$  Hz, 2H), 7.46 (t,  $J = 7.9$  Hz, 2H), 7.99 – 7.94 (m, 2H), 7.91 (d,  $J = 7.6$  Hz, 1H), 7.72 (td,  $J = 7.6, 1.2$  Hz, 1H), 7.40 (s, 1H), 6.89 (dd,  $J = 8.8, 2.2$  Hz, 1H), 6.33 (d,  $J = 2.2$  Hz, 1H), 5.12 (q,  $J = 6.8$  Hz, 1H), 3.72 (s, 3H), 1.64 (d,  $J = 6.8$  Hz, 3H).  $^{13}\text{C}$  NMR (126 MHz,  $\text{CDCl}_3$ )  $\delta$  166.33, 160.19, 145.60, 139.70, 135.15, 133.33, 133.27, 128.91, 128.71, 128.13, 124.63, 124.39, 122.62, 118.43, 113.50, 113.18, 92.70, 57.54, 55.78, 29.74, 17.21. HPLC (Chiralpak IC column, 80:20 hexanes/isopropanol, 1 mL/min),  $t_r = 50.300$  min (minor), 69.517 min (major); ee = 23%. HRMS (ESI)  $m/z$ : calculated for  $[\text{C}_{24}\text{H}_{20}\text{N}_2\text{O}_4\text{S}+\text{H}]^+$  433.1216, found 433.1202.

**(S)-3-methyl-2-(2-tosyl-1H-indol-1-yl)isoindolin-1-one (3n)**

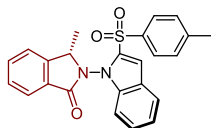

Following the **Procedure 4**, **3n** was obtained as faint yellow solid (30.4 mg, 73% yield).  $^1\text{H}$  NMR (500 MHz,  $\text{CDCl}_3$ )  $\delta$  7.87 (d,  $J = 7.6$  Hz, 1H), 7.84 (d,  $J = 8.0$  Hz, 2H), 7.73 – 7.66 (m, 2H), 7.54 (t,  $J = 7.5$  Hz, 1H), 7.49 (d,  $J = 7.6$  Hz, 1H), 7.41 (s, 1H), 7.28 (t,  $J = 7.7$  Hz, 1H), 7.24 (s, 1H), 7.22 (d,  $J = 8.0$  Hz, 2H), 6.94 (d,  $J = 8.3$  Hz, 1H), 5.12 (q,  $J = 6.8$  Hz, 1H), 2.37 (s, 3H), 1.63 (d,  $J = 6.9$  Hz, 3H).  $^{13}\text{C}$  NMR (126 MHz,  $\text{CDCl}_3$ )  $\delta$  166.57, 145.65, 144.56, 138.10, 138.00, 137.18, 133.33, 129.61, 128.70, 128.60, 128.38, 126.87, 124.49, 124.23, 123.42, 122.71, 122.64, 112.05, 110.05, 58.05, 21.71, 17.34. HPLC (Chiralpak IC column, 80:20 hexanes/isopropanol, 1 mL/min),  $t_r = 47.630$  min (minor), 55.903 min (major); ee = 90%. HRMS (ESI)  $m/z$ : calculated for  $[\text{C}_{24}\text{H}_{20}\text{N}_2\text{O}_3\text{S}+\text{Na}]^+$  439.1086, found 439.1120.

**(S)-2-(2-((4-fluorophenyl)sulfonyl)-1H-indol-1-yl)-3-methylisoindolin-1-one (3o)**

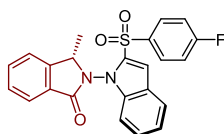

Following the **Procedure 4**, **3o** was obtained as faint yellow solid (29.4 mg, 70% yield).  $^1\text{H}$  NMR (500 MHz,  $\text{CDCl}_3$ )  $\delta$  7.97 (dd,  $J = 8.7, 5.0$  Hz, 2H), 7.86 (d,  $J = 7.6$  Hz, 1H), 7.75 – 7.66 (m, 2H), 7.55 (t,  $J = 7.6$  Hz, 1H), 7.51 (d,  $J = 7.6$  Hz, 1H), 7.46 (s, 1H), 7.30 (t,  $J = 7.7$  Hz, 1H), 7.26 – 7.19 (m, 1H), 7.10 (t,  $J = 8.4$  Hz, 2H), 6.95 (d,  $J = 8.3$  Hz, 1H), 5.13 (q,  $J = 6.8$  Hz, 1H), 1.64 (d,  $J = 6.8$  Hz, 3H).  $^{13}\text{C}$  NMR (126 MHz,  $\text{CDCl}_3$ )  $\delta$  166.76, 165.71 (d,  $J = 256.0$  Hz), 145.65, 138.18, 136.96 (d,  $J = 3.1$  Hz), 136.54, 133.50, 131.28 (d,  $J = 9.7$  Hz), 128.83, 128.37, 127.18, 124.51, 124.16, 123.53, 122.88, 122.70, 116.27 (d,  $J = 22.7$  Hz), 112.47, 110.06, 58.12, 17.40.  $^{19}\text{F}$  NMR (471 MHz,  $\text{CDCl}_3$ )  $\delta$  -103.70. HPLC (Chiralpak IC column, 90:10 hexanes/isopropanol, 1 mL/min),  $t_r = 46.083$  min (minor), 50.427 min (major); ee = 93%. HRMS (ESI)  $m/z$ : calculated for  $[\text{C}_{23}\text{H}_{17}\text{FN}_2\text{O}_3\text{S}+\text{H}]^+$  421.1016, found 421.1000.

**methyl (S)-1-(1-methyl-3-oxoisindolin-2-yl)-1H-indole-2-carboxylate (3p)**

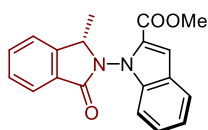

Following the **Procedure 4**, **3p** was obtained as white solid (26.2 mg, 82% yield).  $^1\text{H}$  NMR (500 MHz,  $\text{CDCl}_3$ )  $\delta$  7.95 (d,  $J = 7.6$  Hz, 1H), 7.71 (dd,  $J = 8.3, 0.9$  Hz, 1H), 7.68 (td,  $J = 7.5, 1.1$  Hz, 1H), 7.54 (t,  $J = 7.6$  Hz, 1H), 7.50 (d,  $J = 7.5$  Hz, 1H), 7.45 (s, 1H), 7.36 (dd,  $J = 5.9, 1.2$  Hz, 2H), 7.22 (ddd,  $J = 8.0, 5.8, 2.1$  Hz, 1H), 5.17 (q,  $J = 6.8$  Hz, 1H), 3.77 (s, 3H), 1.57 (d,  $J = 6.8$  Hz, 3H).  $^{13}\text{C}$  NMR (126 MHz,  $\text{CDCl}_3$ )  $\delta$  167.84, 160.93, 145.91, 140.15, 133.03, 129.11, 128.48, 126.66, 126.30, 124.52, 124.09, 122.90, 122.35, 122.10, 111.79, 110.23, 59.85, 51.88, 17.94. HPLC (Chiralpak ID column, 80:20 hexanes/isopropanol, 1 mL/min),  $t_r = 23.823$  min (major), 34.137 min (minor); ee = 94%. HRMS (ESI)  $m/z$ : calculated for  $[\text{C}_{19}\text{H}_{16}\text{N}_2\text{O}_3+\text{Na}]^+$  343.1053, found 343.1087.

**ethyl (S)-1-(1-methyl-3-oxoisindolin-2-yl)-1H-indole-2-carboxylate (3q)**

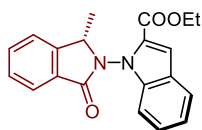

Following the **Procedure 4**, **3q** was obtained as white solid (22.0 mg, 66% yield).  $^1\text{H}$  NMR (500 MHz,  $\text{CDCl}_3$ )  $\delta$  7.94 (d,  $J = 7.6$  Hz, 1H), 7.70 (d,  $J = 8.1$  Hz, 1H), 7.66 (t,  $J = 7.6$  Hz, 1H), 7.52 (t,  $J = 7.6$  Hz, 1H), 7.49 (d,  $J = 9.6$  Hz, 2H), 7.36 – 7.32 (m, 2H), 7.21 (ddd,  $J = 8.1, 5.1, 2.9$  Hz, 1H), 5.15 (q,  $J = 6.8$  Hz, 1H), 4.21 (q,  $J = 7.1$  Hz, 2H), 1.55 (d,  $J = 6.8$  Hz, 3H), 1.17 (t,  $J = 7.1$  Hz, 3H).  $^{13}\text{C}$  NMR (126 MHz,  $\text{CDCl}_3$ )  $\delta$  167.83, 160.48, 145.94, 140.16, 133.07, 129.22, 128.53, 126.88, 126.60, 124.51, 124.16, 122.88, 122.39, 122.09, 111.89, 110.26, 60.88, 59.93, 18.00, 14.07. HPLC (Chiralpak ID column, 80:20 hexanes/isopropanol, 1 mL/min),  $t_r = 24.733$  min (major), 30.817 min (minor); ee = 95%. HRMS (ESI)  $m/z$ : calculated for  $[\text{C}_{20}\text{H}_{18}\text{N}_2\text{O}_3 + \text{Na}]^+$  357.1209, found 357.1237

**(1R,2S,5R)-2-isopropyl-5-methylcyclohexyl 1-((S)-1-methyl-3-oxoisindolin-2-yl)-1H-indole-2-carboxylate (3r)**

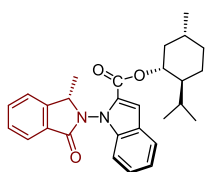

Following the **Procedure 4**, **3r** was obtained as white solid (29.3 mg, 66% yield).  $^1\text{H}$  NMR (500 MHz,  $\text{CDCl}_3$ )  $\delta$  7.95 (d,  $J = 7.6$  Hz, 1H), 7.72 – 7.64 (m, 2H), 7.53 (td,  $J = 7.6, 2.5$  Hz, 1H), 7.49 (dd,  $J = 12.1, 4.5$  Hz, 2H), 7.37 – 7.32 (m, 2H), 7.20 (dt,  $J = 8.0, 3.9$  Hz, 1H), 5.12 (qd,  $J = 6.7, 2.9$  Hz, 1H), 4.80 (tdd,  $J = 11.0, 7.1, 4.4$  Hz, 1H), 1.99 (td,  $J = 12.9, 10.3, 5.8$  Hz, 1H), 1.89 (dtt,  $J = 18.3, 7.0, 3.4$  Hz, 1H), 1.61 (dt,  $J = 13.7, 3.1$  Hz, 2H), 1.55 (dd,  $J = 6.8, 4.8$  Hz, 3H), 1.39 (tdd,  $J = 11.9, 6.5, 3.3$  Hz, 1H), 1.18 (dddd,  $J = 14.1, 11.6, 5.9, 3.0$  Hz, 1H), 1.05 – 0.93 (m, 1H), 0.84 (ddd,  $J = 16.2, 7.2, 4.7$  Hz, 7H), 0.78 – 0.66 (m, 4H).  $^{13}\text{C}$  NMR (126 MHz,  $\text{CDCl}_3$ )  $\delta$  167.61 (d,  $J = 6.0$  Hz), 160.05 (d,  $J = 5.3$  Hz), 145.95 (d,  $J = 7.1$  Hz), 140.13, 133.01 (d,  $J = 1.8$  Hz), 129.33 (d,  $J = 11.2$  Hz), 128.52, 127.33, 126.50 (d,  $J = 5.8$  Hz), 124.59 (d,  $J = 6.0$  Hz), 124.18, 122.80 (d,  $J = 2.7$  Hz), 122.39 (d,  $J = 3.6$  Hz), 122.03, 111.93 (d,  $J = 15.1$  Hz), 110.27 (d,  $J = 3.1$  Hz), 74.77 (d,  $J = 16.6$  Hz), 59.97 (d,  $J = 2.7$  Hz), 47.11, 40.79 (d,  $J = 7.8$  Hz), 34.22, 31.40, 26.31 (d,  $J = 21.3$  Hz), 23.40 (d,  $J = 3.7$  Hz), 22.02 (d,  $J = 6.5$  Hz), 20.85, 18.16, 16.39. HPLC (Chiralpak ID column, 80:20 hexanes/isopropanol, 1 mL/min),  $t_r = 10.377$  min (minor), 12.957 min (major); ee = 97%. HRMS (ESI)  $m/z$ : calculated for  $[\text{C}_{28}\text{H}_{32}\text{N}_2\text{O}_3 + \text{Na}]^+$  467.2305, found 467.2310.

**(S)-3-methyl-2-(2-(trifluoromethyl)-1H-benzo[d]imidazol-1-yl)isoindolin-1-one (3s)**

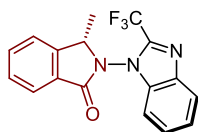

Following the **Procedure 4**, **3s** was obtained as viscous oil (13.9 mg, 42% yield).  $^1\text{H}$  NMR (500 MHz,  $\text{CDCl}_3$ )  $\delta$  7.97 (d,  $J = 7.7$  Hz, 1H), 7.94 (d,  $J = 7.9$  Hz, 1H), 7.76 (t,  $J = 7.6$  Hz, 1H), 7.60 (t,  $J = 7.6$  Hz, 1H), 7.56 (d,  $J = 7.7$  Hz, 1H), 7.40 (dt,  $J = 19.1, 7.5$  Hz, 2H), 7.11 (d,  $J = 8.1$  Hz, 1H), 5.24 (q,  $J = 6.7$  Hz, 1H), 1.58 (d,  $J = 6.4$  Hz, 3H).  $^{13}\text{C}$  NMR (126 MHz,  $\text{CDCl}_3$ )  $\delta$  166.55, 145.36, 141.54 (q,  $J = 40.32$  Hz), 139.30, 134.03, 133.78, 129.20, 127.69, 126.62, 125.01, 124.81, 122.78, 122.53, 118.22 (d,  $J = 272.2$  Hz), 109.63, 58.01, 17.43. HPLC (Chiralpak AD column, 90:10 hexanes/isopropanol,

1 mL/min),  $t_r = 9.007$  min (major), 18.940 min (minor); ee = 82%. HRMS (ESI)  $m/z$ : calculated for  $[C_{17}H_{12}F_3N_3O + Na]^+$  354.0824, found 354.0844.

**(S)-3,4-dimethyl-2-(2-(phenylsulfonyl)-1H-indol-1-yl)isoindolin-1-one (3t)**

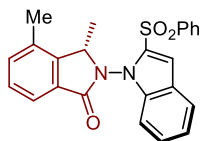

Following the **Procedure 4**, **3t** was obtained as faint yellow solid (30.8 mg, 74% yield).  $^1H$  NMR (500 MHz,  $CDCl_3$ )  $\delta$  7.95 (d,  $J = 7.8$  Hz, 2H), 7.70 (d,  $J = 8.0$  Hz, 1H), 7.65 (s, 1H), 7.53 (t,  $J = 7.5$  Hz, 1H), 7.49 (d,  $J = 7.8$  Hz, 1H), 7.46 – 7.40 (m, 3H), 7.38 (d,  $J = 7.8$  Hz, 1H), 7.27 (t,  $J = 7.7$  Hz, 1H), 7.20 (t,  $J = 7.5$  Hz, 1H), 6.91 (d,  $J = 8.3$  Hz, 1H), 5.08 (q,  $J = 6.9$  Hz, 1H), 2.46 (s, 3H), 1.62 (d,  $J = 6.8$  Hz, 3H).  $^{13}C$  NMR (126 MHz,  $CDCl_3$ )  $\delta$  166.95, 143.02, 140.92, 138.90, 138.16, 136.80, 134.43, 133.58, 128.98, 128.52, 128.34, 126.98, 124.64, 124.20, 123.49, 122.75, 122.47, 112.24, 110.07, 58.11, 21.43, 17.57. HPLC (Chiralpak IC column, 80:20 hexanes/isopropanol, 1 mL/min),  $t_r = 41.520$  min (minor), 52.810 min (major); ee = 94%. HRMS (ESI)  $m/z$ : calculated for  $[C_{24}H_{20}N_2O_3S+H]^+$  433.1216, found 433.1257.

**(S)-4-methoxy-3-methyl-2-(2-(phenylsulfonyl)-1H-indol-1-yl)isoindolin-1-one (3u)**

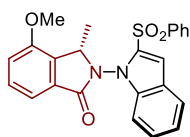

Following the **Procedure 4**, **3u** was obtained as yellow solid (21.6 mg, 50% yield).  $^1H$  NMR (500 MHz,  $CDCl_3$ )  $\delta$  8.06 – 8.01 (m, 2H), 7.72 (d,  $J = 8.0$  Hz, 1H), 7.56 (t,  $J = 7.4$  Hz, 1H), 7.52 – 7.44 (m, 5H), 7.32 (t,  $J = 7.8$  Hz, 1H), 7.23 (t,  $J = 7.6$  Hz, 1H), 7.15 (dd,  $J = 7.2, 1.7$  Hz, 1H), 7.00 (d,  $J = 8.3$  Hz, 1H), 5.16 (q,  $J = 6.7$  Hz, 1H), 3.92 (s, 3H), 1.69 (d,  $J = 6.8$  Hz, 3H).  $^{13}C$  NMR (126 MHz,  $CDCl_3$ )  $\delta$  166.42, 155.14, 141.14, 138.39, 136.74, 133.56, 133.11, 130.38, 130.26, 128.98, 128.35, 127.01, 124.22, 123.40, 122.77, 116.41, 114.70, 112.53, 110.21, 57.19, 55.67, 16.04. HPLC (Chiralpak IC column, 80:20 hexanes/isopropanol, 1 mL/min),  $t_r = 42.467$  min (minor), 61.543 min (major); ee = 88%. HRMS (ESI)  $m/z$ : calculated for  $[C_{24}H_{20}N_2O_4S+Na]^+$  455.1036, found 455.1050.

**(S)-5-fluoro-3-methyl-2-(2-(phenylsulfonyl)-1H-indol-1-yl)isoindolin-1-one (3v)**

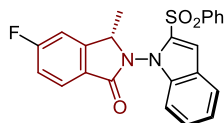

Following the **Procedure 4**, **3v** was obtained as faint yellow solid (25.2 mg, 60% yield).  $^1H$  NMR (500 MHz,  $CDCl_3$ )  $\delta$  7.99 – 7.94 (m, 2H), 7.87 (dd,  $J = 8.4, 5.0$  Hz, 1H), 7.73 (d,  $J = 8.1$  Hz, 1H), 7.56 (t,  $J = 7.4$  Hz, 1H), 7.49 – 7.43 (m, 3H), 7.33 (t,  $J = 7.8$  Hz, 1H), 7.28 – 7.23 (m, 2H), 7.20 (dd,  $J = 8.0, 2.2$  Hz, 1H), 6.95 (d,  $J = 8.4$  Hz, 1H), 5.11 (q,  $J = 6.9$  Hz, 1H), 1.66 (d,  $J = 6.9$  Hz, 3H).  $^{13}C$  NMR (126 MHz,  $CDCl_3$ )  $\delta$  166.26 (d,  $J = 254.4$  Hz), 165.62, 148.15 (d,  $J = 9.8$  Hz), 138.09, 136.73, 133.60, 128.97, 128.29, 127.81, 127.08, 126.99 (d,  $J = 9.7$  Hz), 124.63, 124.24, 123.57, 122.86, 116.74 (d,  $J = 23.5$  Hz), 112.48, 110.17 (d,  $J = 24.2$  Hz), 109.92, 57.82 (d,  $J = 2.6$  Hz), 17.31.  $^{19}F$  NMR (470 MHz,  $CDCl_3$ )  $\delta$  -

103.71 (td,  $J = 8.6, 5.1$  Hz). HPLC (Chiralpak IC column, 80:20 hexanes/isopropanol, 1 mL/min),  $t_r = 39.323$  min (major), 48.370 min (minor); ee = 93%. HRMS (ESI)  $m/z$ : calculated for  $[C_{23}H_{17}FN_2O_3S+H]^+$  421.1016, found 421.0999.

**(S)-6-fluoro-3-methyl-2-(2-(phenylsulfonyl)-1H-indol-1-yl)isoindolin-1-one (3w)**

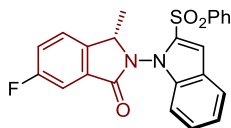

Following the **Procedure 4**, **3w** was obtained as faint yellow solid (35.3 mg, 84% yield).  $^1H$  NMR (500 MHz,  $CDCl_3$ )  $\delta$  7.98 – 7.94 (m, 2H), 7.73 (d,  $J = 8.0$  Hz, 1H), 7.60 – 7.52 (m, 2H), 7.51 – 7.44 (m, 4H), 7.41 (td,  $J = 8.7, 2.5$  Hz, 1H), 7.33 (t,  $J = 7.7$  Hz, 1H), 7.26 – 7.22 (m, 1H), 6.95 (d,  $J = 8.3$  Hz, 1H), 5.11 (q,  $J = 6.8$  Hz, 1H), 1.64 (d,  $J = 6.7$  Hz, 3H).  $^{13}C$  NMR (126 MHz,  $CDCl_3$ )  $\delta$  165.61, 163.00 (d,  $J = 248.9$  Hz), 141.13 (d,  $J = 2.7$  Hz), 140.86, 138.12, 136.65, 133.67, 130.56 (d,  $J = 8.4$  Hz), 129.02, 128.29, 127.13, 124.49 (d,  $J = 8.5$  Hz), 124.23, 123.56, 122.90, 120.98 (d,  $J = 23.5$  Hz), 112.59, 111.27 (d,  $J = 23.6$  Hz), 109.95, 57.88, 17.38.  $^{19}F$  NMR (470 MHz,  $CDCl_3$ )  $\delta$  -111.46. HPLC (Chiralpak IA column, 80:20 hexanes/isopropanol, 1 mL/min),  $t_r = 29.967$  min (major), 37.487 min (minor); ee = 95%. HRMS (ESI)  $m/z$ : calculated for  $[C_{23}H_{17}FN_2O_3S+H]^+$  421.1016, found 421.0995.

**(S)-6-chloro-3-methyl-2-(2-(phenylsulfonyl)-1H-indol-1-yl)isoindolin-1-one (3x)**

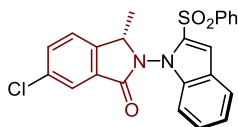

Following the **Procedure 4**, **3x** was obtained as faint yellow solid (30.1 mg, 69% yield).  $^1H$  NMR (500 MHz,  $CDCl_3$ )  $\delta$  7.99 – 7.93 (m, 2H), 7.86 (d,  $J = 2.0$  Hz, 1H), 7.74 (d,  $J = 8.0$  Hz, 1H), 7.67 (dd,  $J = 8.2, 2.0$  Hz, 1H), 7.57 (t,  $J = 7.5$  Hz, 1H), 7.50 – 7.44 (m, 4H), 7.33 (t,  $J = 7.6$  Hz, 1H), 7.24 (d,  $J = 7.7$  Hz, 1H), 6.95 (d,  $J = 8.3$  Hz, 1H), 5.12 (q,  $J = 6.8$  Hz, 1H), 1.64 (d,  $J = 6.8$  Hz, 3H).  $^{13}C$  NMR (126 MHz,  $CDCl_3$ )  $\delta$  165.34, 143.71, 140.84, 138.09, 136.63, 135.16, 133.68, 133.55, 130.29, 129.03, 128.28, 127.15, 124.66, 124.24, 124.09, 123.58, 122.92, 112.62, 109.92, 57.90, 17.26. HPLC (Chiralpak IC column, 80:20 hexanes/isopropanol, 1 mL/min),  $t_r = 30.870$  min (minor), 42.590 min (major); ee = 96%. HRMS (ESI)  $m/z$ : calculated for  $[C_{23}H_{17}ClN_2O_3S+H]^+$  437.0721, found 437.0699.

**(S)-6-bromo-3-methyl-2-(2-(phenylsulfonyl)-1H-indol-1-yl)isoindolin-1-one (3y)**

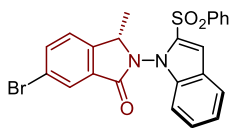

Following the **Procedure 4**, **3y** was obtained as faint yellow solid (19.7 mg, 41% yield).  $^1H$  NMR (500 MHz,  $CDCl_3$ )  $\delta$  8.01 (d,  $J = 1.9$  Hz, 1H), 7.96 (d,  $J = 7.9$  Hz, 2H), 7.82 (dd,  $J = 8.1, 1.9$  Hz, 1H), 7.73 (d,  $J = 8.1$  Hz, 1H), 7.57 (t,  $J = 7.3$  Hz, 1H), 7.49 – 7.44 (m, 3H), 7.40 (d,  $J = 8.1$  Hz, 1H), 7.33 (t,  $J = 7.7$  Hz, 1H), 7.26 – 7.22 (m, 1H), 6.94 (d,  $J = 8.3$  Hz, 1H), 5.09 (q,  $J = 6.8$  Hz, 1H), 1.64 (d,  $J = 6.8$  Hz, 3H).  $^{13}C$  NMR (126 MHz,  $CDCl_3$ )  $\delta$  165.18, 144.19, 140.84, 138.09, 136.65, 136.35, 133.67, 130.55, 129.02, 128.27, 127.67, 127.14, 124.36, 124.25, 123.57, 122.92, 122.88, 112.62, 109.91,



57.95, 17.18. HPLC (Chiralpak IC column, 80:20 hexanes/isopropanol, 1 mL/min),  $t_r$  = 29.000 min (minor), 40.167 min (major); ee = 98%. HRMS (ESI)  $m/z$ : calculated for  $[C_{23}H_{17}BrN_2O_3S+H]^+$  481.0216, found 481.0193.

**(S)-6-iodo-3-methyl-2-(2-(phenylsulfonyl)-1H-indol-1-yl)isoindolin-1-one (3z)**

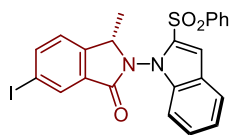

Following the **Procedure 4**, **3z** was obtained as faint yellow solid (17.4 mg, 33% yield).  $^1H$  NMR (500 MHz,  $CDCl_3$ )  $\delta$  8.21 (d,  $J$  = 1.6 Hz, 1H), 8.01 (dd,  $J$  = 8.0, 1.7 Hz, 1H), 7.97 – 7.94 (m, 2H), 7.73 (d,  $J$  = 8.0 Hz, 1H), 7.57 (tt,  $J$  = 7.0, 1.3 Hz, 1H), 7.48 – 7.43 (m, 3H), 7.32 (ddd,  $J$  = 8.3, 7.1, 1.2 Hz, 1H), 7.28 (d,  $J$  = 8.0 Hz, 1H), 7.24 – 7.20 (m, 1H), 6.96 – 6.92 (m, 1H), 5.08 (q,  $J$  = 6.8 Hz, 1H), 1.62 (d,  $J$  = 6.9 Hz, 3H).  $^{13}C$  NMR (126 MHz,  $CDCl_3$ )  $\delta$  165.04, 144.85, 142.10, 140.82, 138.08, 136.59, 133.71, 133.59, 130.60, 129.05, 128.28, 127.17, 124.56, 124.23, 123.59, 122.94, 112.64, 109.94, 93.85, 58.00, 17.15. HPLC (Chiralpak AD column, 70:30 hexanes/isopropanol, 1 mL/min),  $t_r$  = 48.850 min (minor), 57.410 min (major); ee = 92%. HRMS (ESI)  $m/z$ : calculated for  $[C_{23}H_{17}IN_2O_3S+H]^+$  529.0077, found 529.0071.

**(S)-3,6-dimethyl-2-(2-(phenylsulfonyl)-1H-indol-1-yl)isoindolin-1-one (3a')**

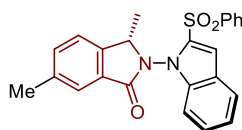

Following the **Procedure 4**, **3a'** was obtained as faint yellow solid (25.4 mg, 61% yield).  $^1H$  NMR (500 MHz,  $CDCl_3$ )  $\delta$  8.02 (dd,  $J$  = 8.3, 1.3 Hz, 2H), 7.73 (dd,  $J$  = 5.9, 2.9 Hz, 1H), 7.71 (d,  $J$  = 8.1 Hz, 1H), 7.57 – 7.51 (m, 1H), 7.48 – 7.42 (m, 5H), 7.31 (ddd,  $J$  = 8.3, 7.1, 1.1 Hz, 1H), 7.21 (d,  $J$  = 7.4 Hz, 1H), 7.00 (d,  $J$  = 8.3 Hz, 1H), 5.12 (q,  $J$  = 6.7 Hz, 1H), 2.43 (s, 3H), 1.65 (d,  $J$  = 6.7 Hz, 3H).  $^{13}C$  NMR (126 MHz,  $CDCl_3$ )  $\delta$  166.47, 143.60, 141.23, 138.39, 136.76, 135.00, 133.60, 133.30, 129.01, 128.92, 128.84, 128.34, 127.07, 124.26, 123.44, 122.84, 122.25, 112.67, 110.25, 57.91, 18.81, 16.31. HPLC (Chiralpak IC column, 80:20 hexanes/isopropanol, 1 mL/min),  $t_r$  = 40.217 min (minor), 50.453 min (major); ee = 94%. HRMS (ESI)  $m/z$ : calculated for  $[C_{24}H_{20}N_2O_3S+Na]^+$  439.1086, found 439.1105.

**(S)-7-chloro-3-methyl-2-(2-(phenylsulfonyl)-1H-indol-1-yl)isoindolin-1-one (3b')**

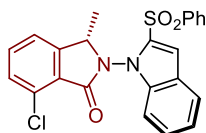

Following the **Procedure 4**, **3b'** was obtained as faint yellow solid (16.1 mg, 37% yield).  $^1H$  NMR (500 MHz,  $CDCl_3$ )  $\delta$  7.95 – 7.90 (m, 2H), 7.72 (d,  $J$  = 8.0 Hz, 1H), 7.58 (dt,  $J$  = 15.9, 7.7 Hz, 2H), 7.46 (t,  $J$  = 4.0 Hz, 2H), 7.43 (t,  $J$  = 7.7 Hz, 2H), 7.39 (d,  $J$  = 7.6 Hz, 1H), 7.30 (t,  $J$  = 7.5 Hz, 1H), 7.22 (t,  $J$  = 7.5 Hz, 1H), 6.93 (d,  $J$  = 8.3 Hz, 1H), 5.10 (q,  $J$  = 6.8 Hz, 1H), 1.67 (d,  $J$  = 6.8 Hz, 3H).  $^{13}C$  NMR (126 MHz,  $CDCl_3$ )  $\delta$  164.03, 147.91, 140.44, 138.13, 137.03, 134.03, 133.71, 132.35, 130.32, 129.02, 128.43, 127.02, 125.00, 124.27, 123.54, 122.79, 121.15, 112.24, 109.97, 57.02, 17.46. HPLC (Chiralpak IC column, 80:20 hexanes/isopropanol, 1 mL/min),  $t_r$  = 43.040 min (major), 55.340 min (minor); ee = 60%. HRMS (ESI)  $m/z$ : calculated for  $[C_{23}H_{17}ClN_2O_3S+H]^+$  437.0721, found 437.0700.

**(S)-2-(2-(phenylsulfonyl)-1H-indol-1-yl)-3-propylisoindolin-1-one (3c')**

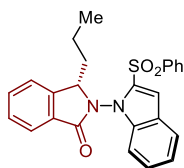

Following the **Procedure 4**, **3c'** was obtained as orange viscous oil (29.2 mg, 68% yield).  $^1\text{H}$  NMR (500 MHz,  $\text{CDCl}_3$ )  $\delta$  8.00 – 7.95 (m, 2H), 7.85 (d,  $J = 7.6$  Hz, 1H), 7.72 (d,  $J = 8.0$  Hz, 1H), 7.67 (d,  $J = 7.5$  Hz, 1H), 7.55 (dd,  $J = 13.2, 5.4$  Hz, 3H), 7.47 – 7.42 (m, 3H), 7.29 (t,  $J = 7.7$  Hz, 1H), 7.21 (t,  $J = 7.6$  Hz, 1H), 6.92 (d,  $J = 8.3$  Hz, 1H), 5.06 (t,  $J = 6.4$  Hz, 1H), 2.20 – 2.09 (m, 1H), 2.04 (ddt,  $J = 13.9, 11.0, 5.5$  Hz, 1H), 1.27 (q,  $J = 6.9, 6.4$  Hz, 2H), 0.88 (t,  $J = 7.2$  Hz, 3H).  $^{13}\text{C}$  NMR (126 MHz,  $\text{CDCl}_3$ )  $\delta$  166.95, 144.95, 140.89, 137.85, 136.65, 133.58, 133.22, 128.96, 128.67, 128.64, 128.34, 126.99, 124.58, 124.11, 123.49, 123.20, 122.67, 112.26, 109.97, 62.13, 34.34, 19.73, 14.04. HPLC (Chiralpak IC column, 80:20 hexanes/isopropanol, 1 mL/min),  $t_r = 27.463$  min (minor), 41.750 min (major); ee = 94%. HRMS (ESI)  $m/z$ : calculated for  $[\text{C}_{25}\text{H}_{22}\text{N}_2\text{O}_3\text{S}+\text{Na}]^+$  453.1243, found 453.1254.

**(S)-3-heptyl-2-(2-(phenylsulfonyl)-1H-indol-1-yl)isoindolin-1-one (3d')**

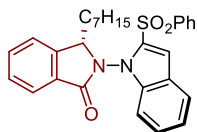

Following the **Procedure 4**, **3d'** was obtained as orange viscous oil (34.5 mg, 71% yield).  $^1\text{H}$  NMR (500 MHz,  $\text{CDCl}_3$ )  $\delta$  8.03 – 7.98 (m, 2H), 7.88 (d,  $J = 7.6$  Hz, 1H), 7.74 (d,  $J = 7.8$  Hz, 1H), 7.71 – 7.66 (m, 1H), 7.57 (dd,  $J = 14.3, 7.5$  Hz, 3H), 7.50 – 7.43 (m, 3H), 7.31 (t,  $J = 7.7$  Hz, 1H), 7.23 (t,  $J = 7.5$  Hz, 1H), 6.95 (d,  $J = 8.3$  Hz, 1H), 5.07 (t,  $J = 6.4$  Hz, 1H), 2.19 (dddd,  $J = 14.5, 10.8, 6.7, 4.4$  Hz, 1H), 2.08 (tt,  $J = 14.6, 5.9$  Hz, 1H), 1.34 – 1.10 (m, 10H), 0.85 (t,  $J = 7.1$  Hz, 3H).  $^{13}\text{C}$  NMR (126 MHz,  $\text{CDCl}_3$ )  $\delta$  166.92, 145.06, 141.01, 137.92, 136.74, 133.59, 133.24, 128.98, 128.70 (d,  $J = 2.9$  Hz), 128.37, 127.83, 127.02, 124.61, 124.17, 123.51, 123.24 (d,  $J = 4.1$  Hz), 122.71, 112.33, 110.05, 62.16, 32.29, 31.71, 29.45, 29.03, 26.35, 22.60, 14.12 (d,  $J = 6.5$  Hz). HPLC (Chiralpak IC column, 80:20 hexanes/isopropanol, 1 mL/min),  $t_r = 21.360$  min (minor), 33.497 min (major); ee = 92%. HRMS (ESI)  $m/z$ : calculated for  $[\text{C}_{29}\text{H}_{30}\text{N}_2\text{O}_3\text{S}+\text{H}]^+$  487.2049, found 487.2046.

**(E)-1-(2-(((2-(phenylsulfonyl)-1H-indol-1-yl)imino)methyl)phenyl)ethan-1-one (Int-1a)**

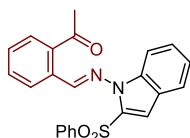

Following the **Procedure 5**, **Int-1a** was obtained as gray solid (31.0 mg, 77% yield).  $^1\text{H}$  NMR (500 MHz,  $\text{CDCl}_3$ )  $\delta$  9.42 (s, 1H), 8.18 (dd,  $J = 7.8, 1.3$  Hz, 1H), 8.11 – 8.04 (m, 3H), 7.88 (dd,  $J = 7.9, 1.3$  Hz, 1H), 7.73 (d,  $J = 8.0$  Hz, 1H), 7.66 (td,  $J = 7.7, 1.3$  Hz, 1H), 7.57 (td,  $J = 7.6, 1.4$  Hz, 1H), 7.54 – 7.46 (m, 3H), 7.43 (dd,  $J = 8.5, 7.1$  Hz, 2H), 7.27 – 7.21 (m, 1H), 2.66 (s, 3H).  $^{13}\text{C}$  NMR (126 MHz,  $\text{CDCl}_3$ )  $\delta$  200.61, 155.33, 141.14, 137.06, 135.05, 133.81, 133.29, 133.23,

132.68, 130.71, 130.07, 128.83, 128.66, 128.33, 127.17, 124.89, 123.31, 122.41, 111.97, 110.68, 28.62. HRMS (ESI)  $m/z$ : calculated for  $[C_{23}H_{18}N_2O_3S+Na]^+$  425.0930, found 425.0942.

### (S)-2-(9H-carbazol-9-yl)-3-methylisoindolin-1-one (7)

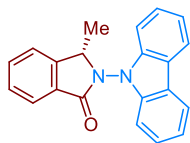

Following the **Procedure 4**, **7** was obtained as red solid (24.0 mg, 77% yield).  $^1H$  NMR (500 MHz,  $CDCl_3$ )  $\delta$  8.11 (dd,  $J = 11.4, 7.7$  Hz, 2H), 8.03 (d,  $J = 7.6$  Hz, 1H), 7.72 (td,  $J = 7.6, 1.2$  Hz, 1H), 7.59 (t,  $J = 7.6$  Hz, 1H), 7.53 (d,  $J = 7.6$  Hz, 1H), 7.41 (dddd,  $J = 12.3, 8.1, 7.1, 1.2$  Hz, 2H), 7.34 (d,  $J = 8.1$  Hz, 1H), 7.32 – 7.27 (m, 2H), 7.13 (d,  $J = 8.1$  Hz, 1H), 5.22 (q,  $J = 6.7$  Hz, 1H), 1.48 (d,  $J = 6.7$  Hz, 3H).  $^{13}C$  NMR (126 MHz,  $CDCl_3$ )  $\delta$  166.46, 145.70, 140.75, 139.22, 133.09, 129.23, 128.78, 126.54, 126.33, 124.76, 122.54, 122.30, 121.86, 120.92, 120.82, 120.77, 120.54, 109.13, 108.44, 57.55, 18.62. HPLC (Chiralpak IC column, 80:20 hexanes/isopropanol, 1 mL/min),  $t_r = 25.680$  min (major), 33.510 min (minor); ee = 7%. HRMS (ESI)  $m/z$ : calculated for  $[C_{21}H_{16}N_2O+Na]^+$  335.1154, found 335.1182.

### General procedure for synthesis of products 4 and 5

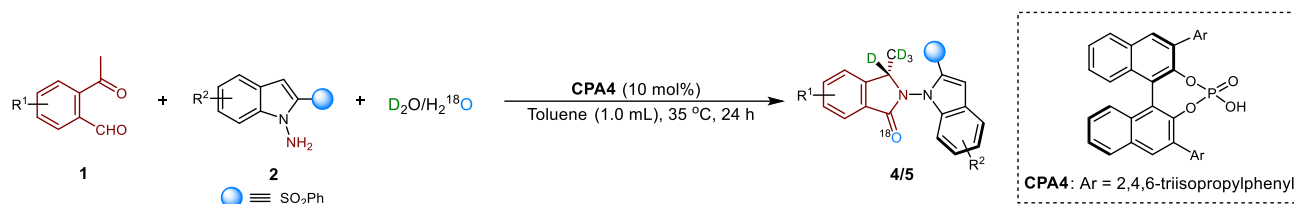

**Procedure 7:** The reaction was proceeded in the glovebox under argon atmosphere. To a 4 mL dry bottle equipped with a stirring bar was added **1** (0.2 mmol, 1.0 eq.), **2** (0.1 mmol, 1.0 eq.), **CPA4** (0.01mmol, 0.1 eq.) and dry toluene (1 mL). The 50  $\mu$ L of deuterium oxide ( $D_2O$ ) or heavy-oxygen water ( $H_2^{18}O$ ) was then added to the flask and the reaction mixture was stirred at 35  $^{\circ}C$  for 24 h. After the completion of the reaction which was indicated by TLC, the crude product was purified by column chromatography on silica gel (PE/EA as the eluent) and the desired product was afforded.

The deuterium incorporation rates of deuterated products were calculated by  $^1H$  NMR. The isotopic ratios of  $^{18}O$  products were obtained by the following formula:

$$isotopic\ ratio = \frac{intensity_{labeled}}{intensity_{total}} = \frac{intensity_{labeled}}{intensity_{labeled} + intensity_{unlabeled}}$$

### Isotopic ratio analysis

#### (S)-3-(methyl- $d_3$ )-2-(2-(phenylsulfonyl)-1H-indol-1-yl)isoindolin-1-one-3- $d$ (4a)

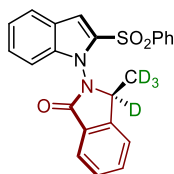

Following the **Procedure 7**, **4a** was obtained as faint yellow solid (26.8 mg, 66% yield).  $^1\text{H}$  NMR (500 MHz,  $\text{CDCl}_3$ )  $\delta$  7.98 (dd,  $J = 7.4, 1.8$  Hz, 2H), 7.87 (d,  $J = 7.6$  Hz, 1H), 7.74 (d,  $J = 7.9$  Hz, 1H), 7.70 (td,  $J = 7.6, 1.1$  Hz, 1H), 7.55 (h,  $J = 4.1$  Hz, 2H), 7.51 (d,  $J = 7.6$  Hz, 1H), 7.49 – 7.43 (m, 3H), 7.34 – 7.27 (m, 1H), 7.24 (d,  $J = 7.6$  Hz, 1H), 6.95 (d,  $J = 8.4$  Hz, 1H), 5.13 (d,  $J = 5.8$  Hz, 0.37H), 1.63 (d,  $J = 7.6$  Hz, 0.28H). HPLC (Chiralpak IC column, 80:20 hexanes/isopropanol, 1 mL/min),  $t_r = 35.663$  min (minor), 41.980 min (major); ee = 95%.

**(S)-3-(methyl- $d_3$ )-2-(3-methyl-2-(phenylsulfonyl)-1H-indol-1-yl)isoindolin-1-one-3- $d$**  (**4b**)

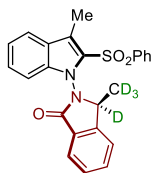

Following the **Procedure 7**, **4b** was obtained as faint yellow solid (33.2 mg, 79% yield).  $^1\text{H}$  NMR (500 MHz,  $\text{CDCl}_3$ )  $\delta$  8.19 (d,  $J = 7.5$  Hz, 2H), 7.99 (d,  $J = 7.6$  Hz, 1H), 7.68 (t,  $J = 7.4$  Hz, 2H), 7.58 – 7.51 (m, 2H), 7.52 – 7.46 (m, 4H), 7.35 (t,  $J = 7.7$  Hz, 1H), 7.24 (q,  $J = 7.5, 7.0$  Hz, 1H), 7.04 (d,  $J = 8.4$  Hz, 1H), 5.06 (d,  $J = 4.4$  Hz, 0.37H), 2.57 (s, 3H), 1.57 (d,  $J = 7.6$  Hz, 0.26H). HPLC (Chiralpak IC column, 80:20 hexanes/isopropanol, 1 mL/min),  $t_r = 21.193$  min (minor), 36.850 min (major); ee = 93%.

**(S)-2-(4-fluoro-2-(phenylsulfonyl)-1H-indol-1-yl)-3-(methyl- $d_3$ )isoindolin-1-one-3- $d$**  (**4c**)

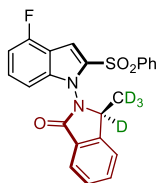

Following the **Procedure 7**, **4c** was obtained as faint yellow solid (38.2 mg, 90% yield).  $^1\text{H}$  NMR (500 MHz,  $\text{CDCl}_3$ )  $\delta$  7.97 (d,  $J = 8.1$  Hz, 2H), 7.86 (d,  $J = 7.8$  Hz, 1H), 7.73 (t,  $J = 7.7$  Hz, 1H), 7.61 – 7.56 (m, 2H), 7.53 (d,  $J = 5.5$  Hz, 2H), 7.47 (t,  $J = 7.8$  Hz, 2H), 7.24 (q,  $J = 9.2, 7.8$  Hz, 1H), 6.90 (t,  $J = 8.9$  Hz, 1H), 6.73 (d,  $J = 8.5$  Hz, 1H), 5.15 (d,  $J = 21.7$  Hz, 0.35H), 1.66 (d,  $J = 7.9$  Hz, 0.34H). HPLC (Chiralpak IC column, 80:20 hexanes/isopropanol, 1 mL/min),  $t_r = 20.023$  min (minor), 24.663 min (major); ee = 94%.

**(S)-2-(5-fluoro-2-(phenylsulfonyl)-1H-indol-1-yl)-3-(methyl- $d_3$ )isoindolin-1-one-3- $d$**  (**4d**)

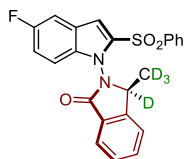

Following the **Procedure 7**, **4d** was obtained as faint yellow solid (34.3 mg, 81% yield).  $^1\text{H}$  NMR (500 MHz,  $\text{CDCl}_3$ )  $\delta$  7.98 – 7.93 (m, 2H), 7.85 (d,  $J = 7.6$  Hz, 1H), 7.73 – 7.68 (m, 1H), 7.57 (td,  $J = 7.5, 1.8$  Hz, 2H), 7.52 (t,  $J = 7.2$  Hz, 1H), 7.48 – 7.43 (m, 2H), 7.40 (s, 1H), 7.38 (dd,  $J = 8.6, 2.5$  Hz, 1H), 7.06 (td,  $J = 8.9, 2.4$  Hz, 1H), 6.89 (dd,  $J = 9.0, 4.1$  Hz, 1H), 5.11 (d,  $J = 5.8$  Hz, 0.32H), 1.64 (d,  $J = 7.6$  Hz, 0.26H). HPLC (Chiralpak AD column, 80:20 hexanes/isopropanol, 1 mL/min),  $t_r = 40.533$  min (major), 51.327 min (minor); ee = 91%.

**(S)-3-(methyl- $d_3$ )-2-(5-methyl-2-(phenylsulfonyl)-1H-indol-1-yl)isoindolin-1-one-3- $d$**  (**4e**)

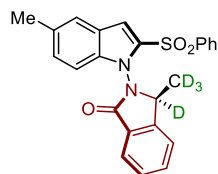

Following the **Procedure 7**, **4e** was obtained as faint yellow solid (33.6 mg, 80% yield).  $^1\text{H}$  NMR (500 MHz,  $\text{CDCl}_3$ )  $\delta$  8.00 – 7.95 (m, 2H), 7.86 (d,  $J = 7.5$  Hz, 1H), 7.69 (td,  $J = 7.5, 1.2$  Hz, 1H), 7.57 – 7.52 (m, 2H), 7.52 – 7.49 (m, 2H), 7.48 – 7.41 (m, 2H), 7.39 (s, 1H), 7.13 (dd,  $J = 8.5, 1.7$  Hz, 1H), 6.85 (d,  $J = 8.5$  Hz, 1H), 5.11 (d,  $J = 6.0$  Hz, 0.33H), 2.42 (s, 3H), 1.61 (d,  $J = 7.6$  Hz, 0.26H). HPLC (Chiralpak IC column, 80:20 hexanes/isopropanol, 1 mL/min),  $t_r = 40.090$  min (minor), 52.667 min (major); ee = 94%.

**(S)-5-fluoro-3-(methyl- $d_3$ )-2-(2-(phenylsulfonyl)-1H-indol-1-yl)isoindolin-1-one-3-d (4f)**

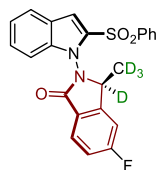

Following the **Procedure 7**, **4f** was obtained as faint yellow solid (26.3 mg, 62% yield).  $^1\text{H}$  NMR (500 MHz,  $\text{CDCl}_3$ )  $\delta$  7.99 – 7.94 (m, 2H), 7.86 (dd,  $J = 8.4, 4.9$  Hz, 1H), 7.74 (d,  $J = 7.9$  Hz, 1H), 7.56 (t,  $J = 7.4$  Hz, 1H), 7.48 – 7.44 (m, 3H), 7.32 (t,  $J = 7.5$  Hz, 1H), 7.25 (dtd,  $J = 7.5, 5.0, 2.4$  Hz, 2H), 7.21 (dd,  $J = 8.1, 2.4$  Hz, 1H), 6.95 (d,  $J = 8.4$  Hz, 1H), 5.11 (d,  $J = 6.0$  Hz, 0.36H), 1.62 (d,  $J = 7.6$  Hz, 0.32H). HPLC (Chiralpak IC column, 80:20 hexanes/isopropanol, 1 mL/min),  $t_r = 38.647$  min (major), 48.400 min (minor); ee = 99%.

**(S)-6-methyl-3-(methyl- $d_3$ )-2-(2-(phenylsulfonyl)-1H-indol-1-yl)isoindolin-1-one-3-d (4g)**

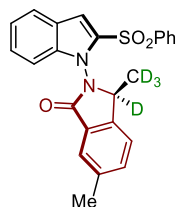

Following the **Procedure 7**, **4g** was obtained as faint yellow solid (24.4 mg, 58% yield).  $^1\text{H}$  NMR (500 MHz,  $\text{CDCl}_3$ )  $\delta$  7.99 – 7.95 (m, 2H), 7.73 (d,  $J = 7.9$  Hz, 1H), 7.67 (s, 1H), 7.58 – 7.54 (m, 1H), 7.52 (dd,  $J = 7.8, 1.7$  Hz, 1H), 7.48 – 7.43 (m, 3H), 7.40 (d,  $J = 7.8$  Hz, 1H), 7.30 (td,  $J = 7.6, 6.9, 1.1$  Hz, 1H), 7.23 (t,  $J = 7.4$  Hz, 1H), 6.93 (d,  $J = 8.4$  Hz, 1H), 5.09 (d,  $J = 5.8$  Hz, 0.33H), 2.49 (s, 3H), 1.61 (d,  $J = 7.6$  Hz, 0.28H). HPLC (Chiralpak IC column, 80:20 hexanes/isopropanol, 1 mL/min),  $t_r = 40.490$  min (minor), 50.473 min (major); ee = 94%.

**(S)-6-bromo-3-(methyl- $d_3$ )-2-(2-(phenylsulfonyl)-1H-indol-1-yl)isoindolin-1-one-3-d (4h)**

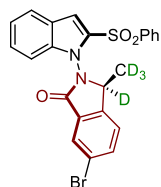

Following the **Procedure 7**, **4h** was obtained as faint yellow solid (32.9 mg, 68% yield).  $^1\text{H}$  NMR (500 MHz,  $\text{CDCl}_3$ )  $\delta$  7.99 (s, 1H), 7.95 (d,  $J = 8.2$  Hz, 2H), 7.75 (dd,  $J = 35.1, 8.7$  Hz, 2H), 7.54 (d,  $J = 7.6$  Hz, 1H), 7.44 (s, 3H), 7.37 (d,  $J = 8.9$  Hz, 1H), 7.29 (d,  $J = 8.4$  Hz, 1H), 7.25 – 7.18 (m, 1H), 6.93 (d,  $J = 8.9$  Hz, 1H), 5.06 (s, 0.3H), 1.56 (s, 0.28H). HPLC (Chiralpak IC column, 80:20 hexanes/isopropanol, 1 mL/min),  $t_r = 30.247$  min (minor), 39.377 min (major); ee = 98%.

**(S)-3-(heptyl-1,1-*d*<sub>2</sub>)-2-(2-(phenylsulfonyl)-1*H*-indol-1-yl)isoindolin-1-one-3-*d*** (**4i**)

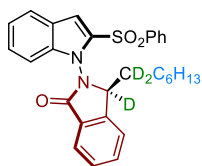

Following the **Procedure 7**, **4i** was obtained as orange viscous oil (20.0 mg, 41% yield). <sup>1</sup>H NMR (500 MHz, CDCl<sub>3</sub>) δ 8.00 (d, *J* = 7.8 Hz, 2H), 7.88 (d, *J* = 7.6 Hz, 1H), 7.74 (d, *J* = 8.1 Hz, 1H), 7.70 (t, *J* = 7.6 Hz, 1H), 7.57 (dd, *J* = 10.9, 7.4 Hz, 3H), 7.47 (d, *J* = 8.8 Hz, 3H), 7.31 (t, *J* = 7.8 Hz, 1H), 7.23 (d, *J* = 7.5 Hz, 1H), 6.95 (d, *J* = 8.3 Hz, 1H), 5.06 (d, *J* = 6.3 Hz, 0.3H), 2.17 (td, *J* = 12.9, 11.7, 5.3 Hz, 0.27H), 2.06 (q, *J* = 6.8, 6.2 Hz, 0.48H), 1.32 – 1.12 (m, 10H), 0.85 (t, *J* = 7.1 Hz, 3H). HPLC (Chiralpak IC column, 80:20 hexanes/isopropanol, 1 mL/min), *tr* = 20.723 min (minor), 33.933 min (major); ee = 93%.

**(S)-3-methyl-2-(2-(phenylsulfonyl)-1*H*-indol-1-yl)isoindolin-1-one-<sup>18</sup>O** (**5a**)

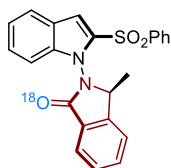

Following the **Procedure 7**, **5a** was obtained as faint yellow solid (35.6 mg, 88% yield). HPLC (Chiralpak IC column, 80:20 hexanes/isopropanol, 1 mL/min), *tr* = 35.810 min (minor), 42.290 min (major); ee = 91%. HRMS (APCI) *m/z*: calculated for [C<sub>23</sub>H<sub>18</sub>N<sub>2</sub>O<sub>2</sub><sup>16</sup>OS+H]<sup>+</sup> 403.1111, found 403.1053, [C<sub>23</sub>H<sub>18</sub>N<sub>2</sub>O<sub>2</sub><sup>18</sup>OS+H]<sup>+</sup> 405.1153, found 405.1148. The ratio of relative peak intensities for the relevant isotopologues was 79:21 (C<sub>23</sub>H<sub>18</sub>N<sub>2</sub>O<sub>2</sub><sup>18</sup>OS:C<sub>23</sub>H<sub>18</sub>N<sub>2</sub>O<sub>2</sub><sup>16</sup>OS).

**(S)-3-methyl-2-(3-methyl-2-(phenylsulfonyl)-1*H*-indol-1-yl)isoindolin-1-one-<sup>18</sup>O** (**5b**)

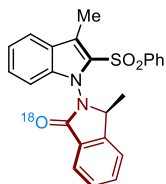

Following the **Procedure 7**, **5b** was obtained as faint yellow solid (34.7 mg, 83% yield). HPLC (Chiralpak IC column, 80:20 hexanes/isopropanol, 1 mL/min), *tr* = 21.303 min (minor), 37.293 min (major); ee = 91%. HRMS (APCI) *m/z*: calculated for [C<sub>24</sub>H<sub>20</sub>N<sub>2</sub>O<sub>2</sub><sup>16</sup>OS+H]<sup>+</sup> 417.1267, found 417.1242, [C<sub>24</sub>H<sub>20</sub>N<sub>2</sub>O<sub>2</sub><sup>18</sup>OS+H]<sup>+</sup> 419.1309, found 419.1294. The ratio of relative peak intensities for the relevant isotopologues was 70:30 (C<sub>24</sub>H<sub>20</sub>N<sub>2</sub>O<sub>2</sub><sup>18</sup>OS:C<sub>24</sub>H<sub>20</sub>N<sub>2</sub>O<sub>2</sub><sup>16</sup>OS).

**(S)-2-(4-fluoro-2-(phenylsulfonyl)-1*H*-indol-1-yl)-3-methylisoindolin-1-one-<sup>18</sup>O** (**5c**)

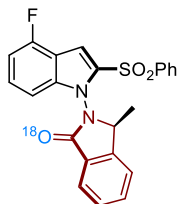

Following the **Procedure 7**, **5c** was obtained as faint yellow solid (30.0 mg, 71% yield). HPLC (Chiralpak IC column, 80:20 hexanes/isopropanol, 1 mL/min), *tr* = 19.983 min (minor), 24.637 min (major); ee = 95%. HRMS (APCI) *m/z*: calculated for [C<sub>23</sub>H<sub>17</sub>FN<sub>2</sub>O<sub>2</sub><sup>16</sup>OS+H]<sup>+</sup> 421.1017, found 421.0993, [C<sub>23</sub>H<sub>17</sub>FN<sub>2</sub>O<sub>2</sub><sup>18</sup>OS+H]<sup>+</sup> 423.1059, found 423.1059. The ratio of relative peak intensities for the relevant isotopologues was 82:18 (C<sub>23</sub>H<sub>17</sub>FN<sub>2</sub>O<sub>2</sub><sup>18</sup>OS: C<sub>23</sub>H<sub>17</sub>FN<sub>2</sub>O<sub>2</sub><sup>16</sup>OS).

**(S)-2-(5-fluoro-2-(phenylsulfonyl)-1H-indol-1-yl)-3-methylisoindolin-1-one-<sup>18</sup>O (5d)**

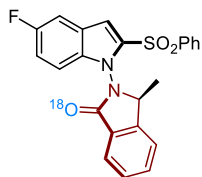

Following the **Procedure 7**, **5d** was obtained as faint yellow solid (27.0 mg, 64% yield). HPLC (Chiralpak AD column, 80:20 hexanes/isopropanol, 1 mL/min),  $t_r = 39.640$  min (major), 50.423 min (minor); ee = 93%. HRMS (APCI)  $m/z$ : calculated for  $[C_{23}H_{17}FN_2O_2^{16}OS+H]^+$  421.1017, found 421.1001,  $[C_{23}H_{17}FN_2O_2^{18}OS+H]^+$  423.1059, found 423.1059. The ratio of relative peak intensities for the relevant isotopologues was 86:14 ( $C_{23}H_{17}FN_2O_2^{18}OS$ :  $C_{23}H_{17}FN_2O_2^{16}OS$ ).

**(S)-3-methyl-2-(5-methyl-2-(phenylsulfonyl)-1H-indol-1-yl)isoindolin-1-one-<sup>18</sup>O (5e)**

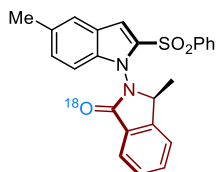

Following the **Procedure 7**, **5e** was obtained as faint yellow solid (28.8 mg, 69% yield). HPLC (Chiralpak IC column, 80:20 hexanes/isopropanol, 1 mL/min),  $t_r = 40.420$  min (minor), 50.493 min (major); ee = 94%. HRMS (APCI)  $m/z$ : calculated for  $[C_{24}H_{20}N_2O_2^{16}OS+H]^+$  417.1267, found 417.1194,  $[C_{24}H_{20}N_2O_2^{18}OS+H]^+$  419.1309, found 419.1283. The ratio of relative peak intensities for the relevant isotopologues was 80:20 ( $C_{24}H_{20}N_2O_2^{18}OS$ :  $C_{24}H_{20}N_2O_2^{16}OS$ ).

**(S)-5-fluoro-3-methyl-2-(2-(phenylsulfonyl)-1H-indol-1-yl)isoindolin-1-one-<sup>18</sup>O (5f)**

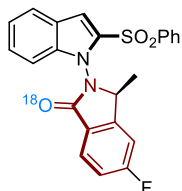

Following the **Procedure 7**, **5f** was obtained as faint yellow solid (32.5 mg, 77% yield). HPLC (Chiralpak IC column, 80:20 hexanes/isopropanol, 1 mL/min),  $t_r = 40.037$  min (major), 49.117 min (minor); ee = 98%. HRMS (APCI)  $m/z$ : calculated for  $[C_{23}H_{17}FN_2O_2^{16}OS+H]^+$  421.1017, found 421.0989,  $[C_{23}H_{17}FN_2O_2^{18}OS+H]^+$  423.1059, found 423.1057. The ratio of relative peak intensities for the relevant isotopologues was 82:18 ( $C_{23}H_{17}FN_2O_2^{18}OS$ :  $C_{23}H_{17}FN_2O_2^{16}OS$ ).

**(S)-3,6-dimethyl-2-(2-(phenylsulfonyl)-1H-indol-1-yl)isoindolin-1-one-<sup>18</sup>O (5g)**

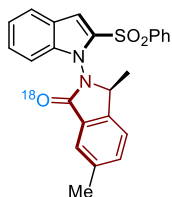

Following the **Procedure 7**, **5g** was obtained as faint yellow solid (32.2 mg, 77% yield). HPLC (Chiralpak IC column, 80:20 hexanes/isopropanol, 1 mL/min),  $t_r = 40.420$  min (minor), 50.493 min (major); ee = 94%. HRMS (APCI)  $m/z$ : calculated for  $[C_{24}H_{20}N_2O_2^{16}OS+H]^+$  417.1267, found 417.1194,  $[C_{24}H_{20}N_2O_2^{18}OS+H]^+$  419.1309, found 419.1303. The ratio of relative peak intensities for the relevant isotopologues was 82:18 ( $C_{24}H_{20}N_2O_2^{18}OS$ :  $C_{24}H_{20}N_2O_2^{16}OS$ ).

**(S)-6-bromo-3-methyl-2-(2-(phenylsulfonyl)-1H-indol-1-yl)isoindolin-1-one-<sup>18</sup>O (5h)**

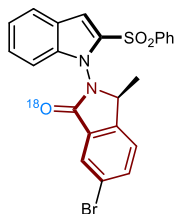

Following the **Procedure 7**, **5h** was obtained as faint yellow solid (31.3 mg, 65% yield). HPLC (Chiralpak IC column, 80:20 hexanes/isopropanol, 1 mL/min),  $t_r$  = 28.633 min (minor), 39.330 min (major); ee = 99%. HRMS (APCI)  $m/z$ : calculated for  $[C_{23}H_{17}BrN_2O_2^{16}OS+H]^+$  481.0216, found 481.0156,  $[C_{23}H_{17}BrN_2O_2^{18}OS+H]^+$  483.0258, found 483.0242. The ratio of relative peak intensities for the relevant isotopologues was 91:9 ( $C_{23}H_{17}BrN_2O_2^{18}OS$ :  $C_{23}H_{17}BrN_2O_2^{16}OS$ ).  
**(S)-3-heptyl-2-(2-(phenylsulfonyl)-1H-indol-1-yl)isoindolin-1-one- $^{18}O$  (5i)**

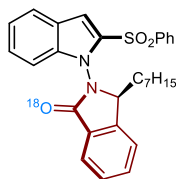

Following the **Procedure 7**, **5i** was obtained as orange viscous oil (30.7 mg, 63% yield). HPLC (Chiralpak IC column, 80:20 hexanes/isopropanol, 1 mL/min),  $t_r$  = 20.920 min (minor), 32.467 min (major); ee = 94%. HRMS (APCI)  $m/z$ : calculated for  $[C_{29}H_{30}N_2O_2^{16}OS+H]^+$  487.2049, found 487.1987,  $[C_{29}H_{30}N_2O_2^{18}OS+H]^+$  489.2092, found 489.2080. The ratio of relative peak intensities for the relevant isotopologues was 83:17 ( $C_{29}H_{30}N_2O_2^{18}OS$ : $C_{29}H_{30}N_2O_2^{16}OS$ ).

### Synthetic applications of **3a**

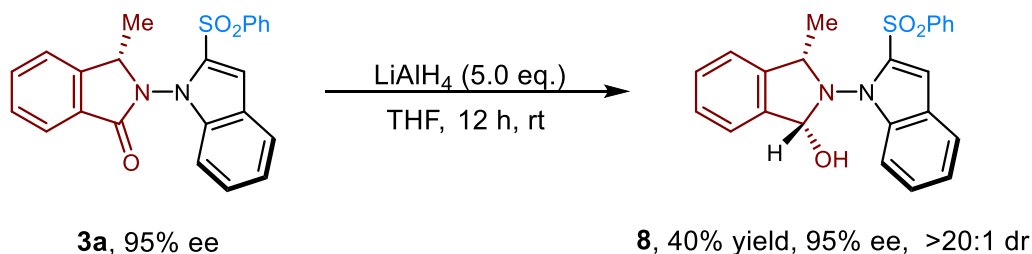

The reaction was proceeded in the glovebox under argon atmosphere. To a solution of **3a** (80.4 mg, 0.2 mmol, 1.0 eq.) in THF (1 mL) was added  $LiAlH_4$  (38.0 mg, 1.0 mmol, 5.0 eq.) slowly. Then the mixture was stirred at room temperature for 12 h. The mixture was quenched with triethylamine and water. Then the mixture was extracted with EA (5 mL x 3). The combined organic layers were dried over anhydrous  $Na_2SO_4$ , filtered and concentrated in vacuo. The residue was purified by column chromatography on silica gel (PE/EA as eluent, a small amount of triethylamine was required to be added to the eluent) and the product **8** (32.3 mg, 40% yield) was given.

### **(1R,3S)-3-methyl-2-(2-(phenylsulfonyl)-1H-indol-1-yl)isoindolin-1-ol (8)**

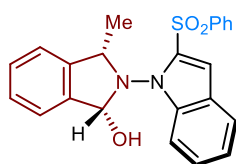



Following the above procedure, compound **8** was obtained as red solid (32.3 mg, 40% yield). <sup>1</sup>H NMR (500 MHz, CDCl<sub>3</sub>) δ 8.08 – 8.03 (m, 2H), 7.74 (dd, *J* = 7.1, 1.8 Hz, 1H), 7.64 – 7.59 (m, 1H), 7.54 – 7.48 (m, 3H), 7.44 – 7.40 (m, 2H), 7.26 (s, 1H), 7.20 (qd, *J* = 7.4, 1.4 Hz, 2H), 7.13 (dd, *J* = 5.0, 3.5 Hz, 1H), 6.94 – 6.90 (m, 1H), 6.37 (s, 1H), 5.00 (q, *J* = 6.5 Hz, 1H), 4.26 (s, 1H), 0.75 (d, *J* = 6.5 Hz, 3H). <sup>13</sup>C NMR (126 MHz, CDCl<sub>3</sub>) δ 140.86, 140.58, 138.25, 137.14, 135.60, 133.92, 129.45, 129.18, 129.03, 128.45, 125.95, 124.52, 124.06, 123.93, 122.07, 121.95, 111.32, 109.50, 92.12, 63.38, 19.83. HPLC (Chiralpak IA column, 85:15 hexanes/isopropanol, 1 mL/min), *tr* = 23.357 min (minor), 39.050 min (major); *ee* = 95%. HRMS (APCI) *m/z*: calculated for [C<sub>23</sub>H<sub>20</sub>N<sub>2</sub>O<sub>3</sub>S+Na]<sup>+</sup> 427.1086, found 427.1092.

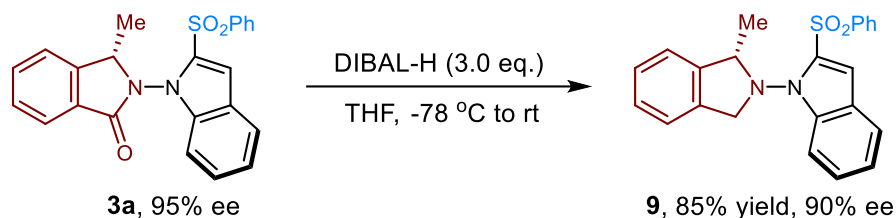

The reaction was proceeded under argon atmosphere. A solution of **3a** (80.4 mg, 0.2 mmol, 1.0 eq.) in THF (1 mL) was cooled at -78 °C. Then [(CH<sub>3</sub>)<sub>2</sub>CHCH<sub>2</sub>]<sub>2</sub>AlH (1 M in THF, 0.6 mL, 0.6 mmol, 3.0 eq.) was added to the mixture, and the mixture stirred at -78 °C for 12 h. After the mixture stirred at room temperature for a while, the mixture was quenched with water. Then the mixture was extracted with EA (5 mL x 3). The combined organic layers were dried over anhydrous Na<sub>2</sub>SO<sub>4</sub>, filtered and concentrated in vacuo. The residue was purified by column chromatography on silica gel (PE/EA as eluent) and the product **9** (66.0 mg, 85% yield) was given.

#### (S)-1-(1-methylisoindolin-2-yl)-2-(phenylsulfonyl)-1H-indole (**9**)

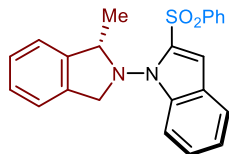

Following the above procedure, compound **9** was obtained as red solid (66.0 mg, 85% yield). <sup>1</sup>H NMR (500 MHz, CDCl<sub>3</sub>) δ 7.97 (dd, *J* = 8.3, 1.4 Hz, 2H), 7.79 – 7.74 (m, 1H), 7.59 – 7.52 (m, 1H), 7.42 (t, *J* = 7.8 Hz, 2H), 7.35 (s, 1H), 7.32 (d, *J* = 7.4 Hz, 1H), 7.28 (t, *J* = 7.3 Hz, 1H), 7.18 (qd, *J* = 7.4, 1.5 Hz, 3H), 7.10 – 7.06 (m, 2H), 5.20 (q, *J* = 6.6 Hz, 1H), 4.41 (d, *J* = 13.1 Hz, 1H), 3.52 – 3.46 (m, 1H), 1.26 (d, *J* = 6.4 Hz, 3H). <sup>13</sup>C NMR (126 MHz, CDCl<sub>3</sub>) δ 141.70, 140.89, 137.66, 136.28, 134.66, 133.19, 129.07, 128.80, 127.76, 127.62, 125.13, 124.95, 124.06, 122.34, 122.30, 121.49, 111.86, 107.75, 64.39, 57.52, 19.40. HPLC (Chiralpak IA column, 85:15 hexanes/isopropanol, 1 mL/min), *tr* = 8.647 min (major), 14.747 min (minor); *ee* = 90%. HRMS (APCI) *m/z*: calculated for [C<sub>23</sub>H<sub>20</sub>N<sub>2</sub>O<sub>2</sub>S+Na]<sup>+</sup> 411.1137, found 411.1130.

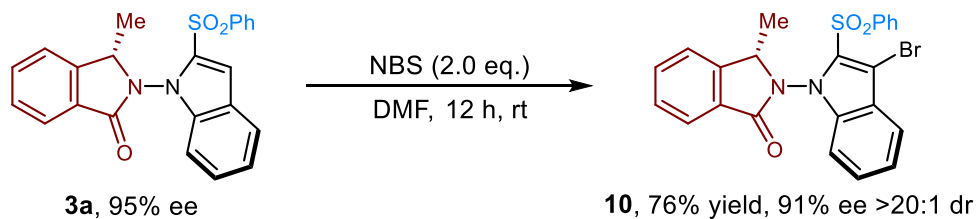

To a solution of **3a** (80.4 mg, 0.2 mmol, 1.0 eq.) in DMF (1 mL) was added *N*-bromosuccinimide (71.2 mg, 0.4 mmol, 2.0 eq.) slowly. Then the mixture was stirred at room temperature for 12 h. The mixture was quenched water.

Then the mixture was extracted with EA (5 mL x 3). The combined organic layers were dried over anhydrous Na<sub>2</sub>SO<sub>4</sub>, filtered and concentrated in vacuo. The residue was purified by column chromatography on silica gel (PE/EA as eluent) and the product **10** (73.0 mg, 76% yield) was given.

**(S)-2-(3-bromo-2-(phenylsulfonyl)-1H-indol-1-yl)-3-methylisoindolin-1-one (10)**

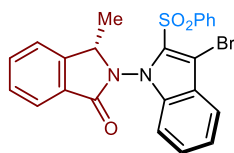

Following the above procedure, compound **10** was obtained as white solid (73.0 mg, 76% yield). <sup>1</sup>H NMR (500 MHz, CDCl<sub>3</sub>) δ 8.30 (dd, *J* = 7.8, 1.7 Hz, 2H), 8.03 (d, *J* = 7.6 Hz, 1H), 7.74 – 7.70 (m, 1H), 7.68 (d, *J* = 8.1 Hz, 1H), 7.59 (t, *J* = 7.5 Hz, 2H), 7.55 – 7.50 (m, 3H), 7.44 – 7.40 (m, 1H), 7.31 (t, *J* = 7.6 Hz, 1H), 7.11 (d, *J* = 8.3 Hz, 1H), 5.11 (q, *J* = 6.8 Hz, 1H), 1.63 (d, *J* = 6.8 Hz, 3H). <sup>13</sup>C NMR (126 MHz, CDCl<sub>3</sub>) δ 166.56, 145.45, 140.88, 137.11, 133.88, 133.29, 132.01, 128.83, 128.79, 128.76, 128.70, 128.35, 125.19, 124.83, 123.51, 122.55, 121.89, 110.28, 101.54, 57.72, 16.86. HPLC (Chiralpak AD column, 80:20 hexanes/isopropanol, 1 mL/min), *t*<sub>r</sub> = 15.870 min (major), 23.587 min (minor); ee = 91%. HRMS (APCI) *m/z*: calculated for [C<sub>23</sub>H<sub>17</sub>BrN<sub>2</sub>O<sub>3</sub>S+Na]<sup>+</sup> 503.0035, found 503.0043.

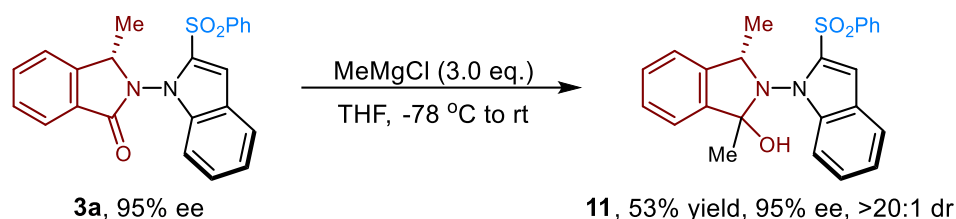

The reaction was proceeded under argon atmosphere. A solution of **3a** (80.4 mg, 0.2 mmol, 1.0 eq.) in THF (1 mL) was cooled at -78 °C. Then MeMgCl (1 M in THF, 0.6 mL, 0.6 mmol, 3.0 eq.) was added to the mixture, and the mixture stirred at -78 °C for 0.5 h. After the mixture stirred at room temperature for 12 h, the mixture was quenched with triethylamine water. Then the mixture was extracted with EA (5 mL x 3). The combined organic layers were dried over anhydrous Na<sub>2</sub>SO<sub>4</sub>, filtered and concentrated in vacuo. The residue was purified by column chromatography on silica gel (PE/EA as eluent, a small amount of triethylamine was required to be added to the eluent) and the product **9** (44.3 mg, 53% yield) was given. The absolute configuration of **11** regarding the quaternary carbon stereocenters was not determined.

**(3S)-1,3-dimethyl-2-(2-(phenylsulfonyl)-1H-indol-1-yl)isoindolin-1-ol (11)**

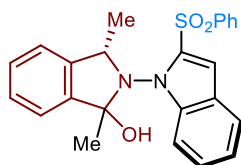

Following the above procedure, compound **11** was obtained as red solid (44.3 mg, 53% yield). <sup>1</sup>H NMR (500 MHz, CDCl<sub>3</sub>) δ 8.06 – 8.01 (m, 2H), 7.75 – 7.71 (m, 1H), 7.60 (t, *J* = 7.4 Hz, 1H), 7.51 (t, *J* = 7.7 Hz, 2H), 7.48 – 7.46 (m, 1H), 7.42 – 7.38 (m, 3H), 7.20 – 7.15 (m, 2H), 7.14 – 7.11 (m, 1H), 6.73 – 6.68 (m, 1H), 5.06 (s, 1H), 4.91 (q, *J* = 6.6

Hz, 1H), 1.57 (s, 3H), 0.58 (d,  $J = 6.6$  Hz, 3H).  $^{13}\text{C}$  NMR (126 MHz,  $\text{CDCl}_3$ )  $\delta$  142.50, 141.32, 140.58, 137.36, 136.83, 133.79, 129.22, 129.17, 128.81, 128.39, 126.13, 124.15, 123.87, 122.69, 121.89, 121.71, 112.35, 109.87, 97.13, 63.93, 24.13, 21.17. HPLC (Chiralpak IAcolumn, 80:20 hexanes/isopropanol, 1 mL/min),  $t_r = 8.953$  min (major), 22.577 min (minor); ee = 95%. HRMS (APCI)  $m/z$ : calculated for  $[\text{C}_{24}\text{H}_{22}\text{N}_2\text{O}_3\text{S}+\text{Na}]^+$  441.1243, found 441.1269.

X-ray structures of (*P, S*)-3a, (*M, R*)-3a, Int0 and 8

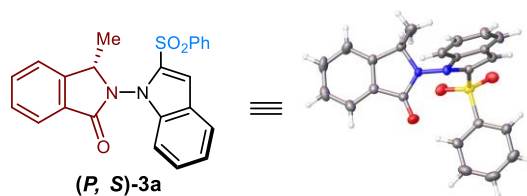

**Table S1. Crystal data and structure refinement for CCDC 2359270**

|                                             |                                                                 |
|---------------------------------------------|-----------------------------------------------------------------|
| Identification code                         | <b>CCDC 2359270</b>                                             |
| Empirical formula                           | C <sub>23</sub> H <sub>18</sub> N <sub>2</sub> O <sub>3</sub> S |
| Formula weight                              | 402.45                                                          |
| Temperature/K                               | 193.00                                                          |
| Crystal system                              | monoclinic                                                      |
| Space group                                 | P21                                                             |
| a/Å                                         | 8.3879(8)                                                       |
| b/Å                                         | 12.8676(13)                                                     |
| c/Å                                         | 9.7824(10)                                                      |
| α/°                                         | 90                                                              |
| β/°                                         | 111.619(3)                                                      |
| γ/°                                         | 90                                                              |
| Volume/Å <sup>3</sup>                       | 981.56(17)                                                      |
| Z                                           | 2                                                               |
| ρ <sub>calc</sub> /cm <sup>3</sup>          | 1.362                                                           |
| μ/mm <sup>-1</sup>                          | 1.693                                                           |
| F(000)                                      | 420.0                                                           |
| Crystal size/mm <sup>3</sup>                | 0.13 × 0.11 × 0.1                                               |
| Radiation                                   | CuKα (λ = 1.54178)                                              |
| 2θ range for data collection/°              | 11.346 to 136.904                                               |
| Index ranges                                | -10 ≤ h ≤ 10, -15 ≤ k ≤ 15, -11 ≤ l ≤ 11                        |
| Reflections collected                       | 16483                                                           |
| Independent reflections                     | 3435 [R <sub>int</sub> = 0.0289, R <sub>sigma</sub> = 0.0343]   |
| Data/restraints/parameters                  | 3435/1/264                                                      |
| Goodness-of-fit on F <sup>2</sup>           | 1.076                                                           |
| Final R indexes [I ≥ 2σ (I)]                | R1 = 0.0246, wR2 = 0.0596                                       |
| Final R indexes [all data]                  | R1 = 0.0247, wR2 = 0.0596                                       |
| Largest diff. peak/hole / e Å <sup>-3</sup> | 0.28/-0.19                                                      |
| Flack parameter                             | 0.090(4)                                                        |

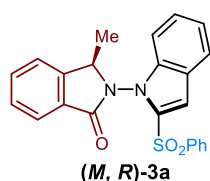

≡

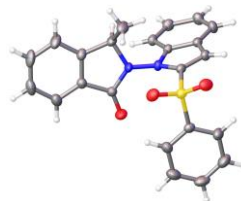

**Table S2. Crystal data and structure refinement for CCDC 2362138**

|                                             |                                                                 |
|---------------------------------------------|-----------------------------------------------------------------|
| Identification code                         | <b>CCDC 2362138</b>                                             |
| Empirical formula                           | C <sub>23</sub> H <sub>18</sub> N <sub>2</sub> O <sub>3</sub> S |
| Formula weight                              | 402.45                                                          |
| Temperature/K                               | 193.00                                                          |
| Crystal system                              | monoclinic                                                      |
| Space group                                 | P21                                                             |
| a/Å                                         | 8.3907(4)                                                       |
| b/Å                                         | 12.8791(6)                                                      |
| c/Å                                         | 9.7624(4)                                                       |
| α/°                                         | 90                                                              |
| β/°                                         | 111.3930(10)                                                    |
| γ/°                                         | 90                                                              |
| Volume/Å <sup>3</sup>                       | 982.28(8)                                                       |
| Z                                           | 2                                                               |
| ρ <sub>calc</sub> /cm <sup>3</sup>          | 1.361                                                           |
| μ/mm <sup>-1</sup>                          | 1.691                                                           |
| F(000)                                      | 420.0                                                           |
| Crystal size/mm <sup>3</sup>                | 0.14 × 0.13 × 0.1                                               |
| Radiation                                   | CuKα (λ = 1.54178)                                              |
| 2θ range for data collection/°              | 9.73 to 136.548                                                 |
| Index ranges                                | -10 ≤ h ≤ 10, -14 ≤ k ≤ 15, -11 ≤ l ≤ 11                        |
| Reflections collected                       | 15494                                                           |
| Independent reflections                     | 3365 [R <sub>int</sub> = 0.0257, R <sub>sigma</sub> = 0.0326]   |
| Data/restraints/parameters                  | 3365/1/263                                                      |
| Goodness-of-fit on F <sup>2</sup>           | 1.098                                                           |
| Final R indexes [I ≥ 2σ (I)]                | R <sub>1</sub> = 0.0266, wR <sub>2</sub> = 0.0666               |
| Final R indexes [all data]                  | R <sub>1</sub> = 0.0267, wR <sub>2</sub> = 0.0667               |
| Largest diff. peak/hole / e Å <sup>-3</sup> | 0.20/-0.40                                                      |
| Flack parameter                             | 0.074(5)                                                        |

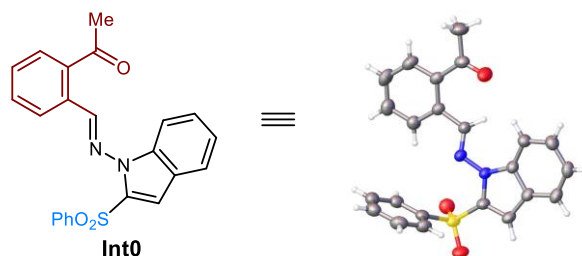

**Table S3. Crystal data and structure refinement for CCDC 2354174**

|                                               |                                                              |
|-----------------------------------------------|--------------------------------------------------------------|
| Identification code                           | <b>CCDC 2354174</b>                                          |
| Empirical formula                             | $C_{23}H_{18}N_2O_3S$                                        |
| Formula weight                                | 402.45                                                       |
| Temperature/K                                 | 223.00                                                       |
| Crystal system                                | monoclinic                                                   |
| Space group                                   | P21/c                                                        |
| $a/\text{\AA}$                                | 11.0123(12)                                                  |
| $b/\text{\AA}$                                | 12.1777(14)                                                  |
| $c/\text{\AA}$                                | 14.8173(17)                                                  |
| $\alpha/^\circ$                               | 90                                                           |
| $\beta/^\circ$                                | 104.644(4)                                                   |
| $\gamma/^\circ$                               | 90                                                           |
| Volume/ $\text{\AA}^3$                        | 1922.5(4)                                                    |
| Z                                             | 4                                                            |
| $\rho_{\text{calc}}/\text{cm}^3$              | 1.390                                                        |
| $\mu/\text{mm}^{-1}$                          | 1.728                                                        |
| F(000)                                        | 840.0                                                        |
| Crystal size/ $\text{mm}^3$                   | $0.13 \times 0.11 \times 0.1$                                |
| Radiation                                     | CuK $\alpha$ ( $\lambda = 1.54178$ )                         |
| $2\theta$ range for data collection/ $^\circ$ | 8.298 to 137.162                                             |
| Index ranges                                  | $-13 \leq h \leq 13, -14 \leq k \leq 14, -17 \leq l \leq 17$ |
| Reflections collected                         | 41027                                                        |
| Independent reflections                       | 3524 [Rint = 0.0334, Rsigma = 0.0201]                        |
| Data/restraints/parameters                    | 3524/0/263                                                   |
| Goodness-of-fit on F2                         | 1.047                                                        |
| Final R indexes [ $I \geq 2\sigma(I)$ ]       | R1 = 0.0313, wR2 = 0.0828                                    |
| Final R indexes [all data]                    | R1 = 0.0327, wR2 = 0.0835                                    |
| Largest diff. peak/hole / $e \text{\AA}^{-3}$ | 0.19/-0.38                                                   |

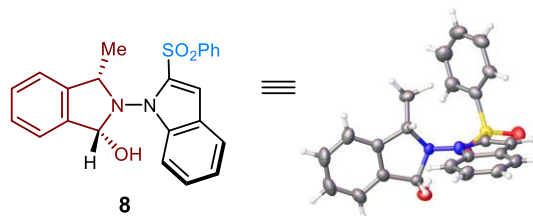

**Table S4. Crystal data and structure refinement for CCDC 2393057**

|                                             |                                                                 |
|---------------------------------------------|-----------------------------------------------------------------|
| Identification code                         | <b>CCDC 2393057</b>                                             |
| Empirical formula                           | C <sub>23</sub> H <sub>20</sub> N <sub>2</sub> O <sub>3</sub> S |
| Formula weight                              | 404.47                                                          |
| Temperature/K                               | 193.15                                                          |
| Crystal system                              | orthorhombic                                                    |
| Space group                                 | P212121                                                         |
| a/Å                                         | 8.84300(10)                                                     |
| b/Å                                         | 12.3300(2)                                                      |
| c/Å                                         | 18.0497(2)                                                      |
| α/°                                         | 90                                                              |
| β/°                                         | 90                                                              |
| γ/°                                         | 90                                                              |
| Volume/Å <sup>3</sup>                       | 1968.03(4)                                                      |
| Z                                           | 4                                                               |
| ρ <sub>calc</sub> /cm <sup>3</sup>          | 1.365                                                           |
| μ/mm <sup>-1</sup>                          | 1.689                                                           |
| F(000)                                      | 848.0                                                           |
| Crystal size/mm <sup>3</sup>                | 0.1 × 0.1 × 0.1                                                 |
| Radiation                                   | CuKα (λ = 1.54184)                                              |
| 2θ range for data collection/°              | 8.686 to 136.434                                                |
| Index ranges                                | -10 ≤ h ≤ 10, -14 ≤ k ≤ 14, -21 ≤ l ≤ 21                        |
| Reflections collected                       | 40924                                                           |
| Independent reflections                     | 3603 [R <sub>int</sub> = 0.0329, R <sub>sigma</sub> = 0.0216]   |
| Data/restraints/parameters                  | 3603/0/272                                                      |
| Goodness-of-fit on F <sup>2</sup>           | 1.075                                                           |
| Final R indexes [I ≥ 2σ (I)]                | R <sub>1</sub> = 0.0251, wR <sub>2</sub> = 0.0668               |
| Final R indexes [all data]                  | R <sub>1</sub> = 0.0255, wR <sub>2</sub> = 0.0672               |
| Largest diff. peak/hole / e Å <sup>-3</sup> | 0.14/-0.38                                                      |
| Flack parameter                             | 0.034(3)                                                        |

## Racemization experiment

Compound **3a** (0.1 mmol) were added to a vial equipped with a magnetic stirring bar. The vial was then charged with toluene (1.0 mL). The vial was sealed, and the mixture was stirred at 70 °C. The ee of the obtained compound **3a** was detected directly. At given interval of time, small samples (5  $\mu$ L) was removed via syringe and subjected into the HPLC to measure the enantiomeric excess.

The enantiomerisation barrier, corresponding to barrier to rotation for **3a** atropisomers, was obtained by kinetic of racemization of an enantiomer. The slope of the first-order kinetic line gives the racemization constant ( $k_{\text{racemization}} = 2 \times k_{\text{enantiomerisation}}$ ). Eyring equation gives the enantiomerisation barrier from enantiomerisation constant ( $k_{\text{enantiomerisation}}$ ),  $R = 8.31451 \text{ J} \cdot \text{K}^{-1} \cdot \text{mol}^{-1}$ ,  $h = 6.62608 \times 10^{-34} \text{ J} \cdot \text{s}$  and  $k_B = 1.38066 \times 10^{-23} \text{ J} \cdot \text{K}^{-1}$  ( $-\ln ee = \ln\{(1+M/P)/(1-M/P)\}$ ).

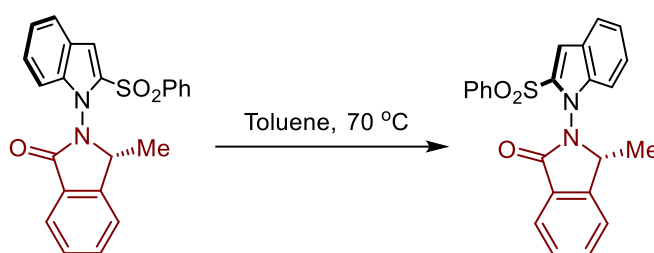

| Time/h | ee (%) | -ln ee   | Time/h | ee (%) | -ln ee   |
|--------|--------|----------|--------|--------|----------|
| 0      | 98.54  | -4.59046 | 24     | 76.26  | -4.33414 |
| 0.5    | 98.30  | -4.58802 | 36     | 60.70  | -4.10594 |
| 1      | 97.38  | -4.57862 | 48     | 57.22  | -4.04690 |
| 2      | 94.76  | -4.55134 | 57     | 51.50  | -3.94158 |
| 4      | 92.60  | -4.52828 | 72.5   | 43.38  | -3.8133  |
| 8      | 88.20  | -4.47960 | 83.5   | 39.96  | -3.68637 |
| 12     | 83.58  | -4.42580 | 98.5   | 35.23  | -3.56189 |

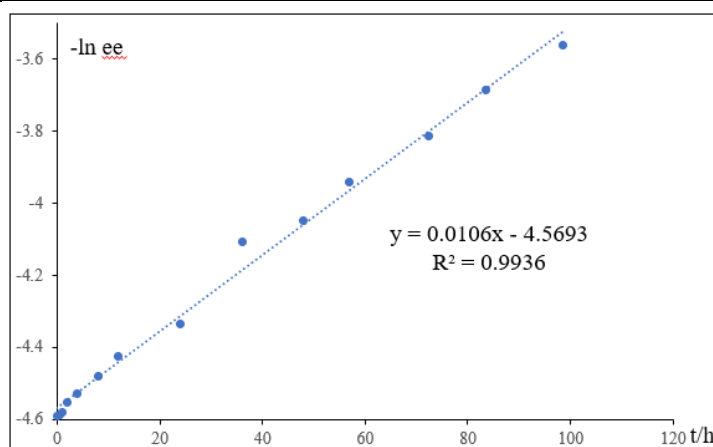

Figure S1. Racemization experiments.



$k_{\text{racemization}} = 0.01060 \text{ h}^{-1}$ ;  $k_{\text{enantiomerization}} = 0.00530 \text{ h}^{-1}$

Half-life time  $t_{1/2}$  (343K) = 65.39 h

$\Delta G^{343\text{K}} = 29.33 \text{ kcal/mol}$

In addition, we calculated the rotational barriers of **ii** and **8** about the N-N axis, as shown in **Figure S2**. The calculated rotational barriers were 30.7 and 30.5 kcal/mol, respectively. This result indicated that the axial chirality was generated in the annulation process.

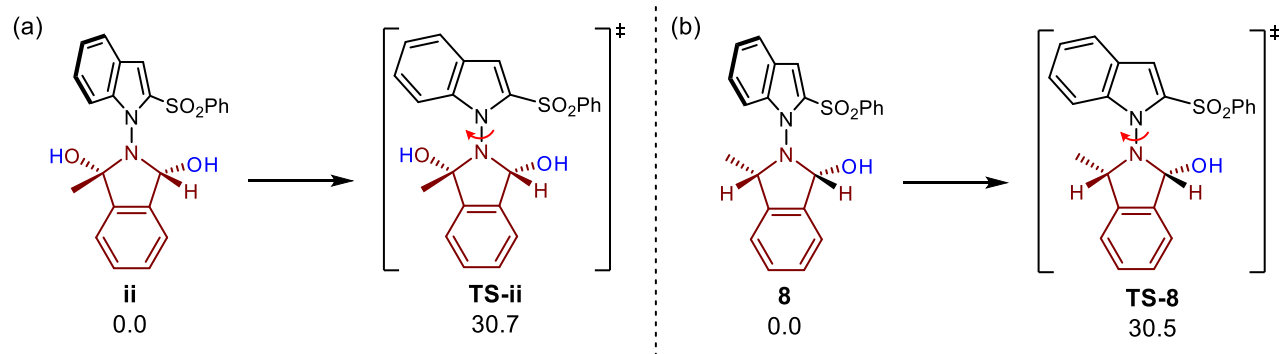

**Figure S2.** The rotational energy barriers of **Int2**<sub>1S-5a-3R</sub>, **8** and **9** (in kcal/mol).

## Computational methods

The Gaussian 16 program was used for all the DFT calculations.<sup>[4]</sup> Geometry optimizations were optimized at the M06-2X<sup>[5]</sup> and def2-SVP<sup>[6]</sup> basis set level of theory. The single-point energies in toluene were calculated using the SMD solvation model at the M06-2X and def2-TZVPP basis set level of theory. Vibrational frequency calculations were performed at the same level to obtain thermal energy correction, and to confirm the stationary point is an energy minimum or a transition state. Intrinsic reaction coordinate (IRC)<sup>[7-8]</sup> calculations were performed to confirm the connection between transition state and its reactant and product.

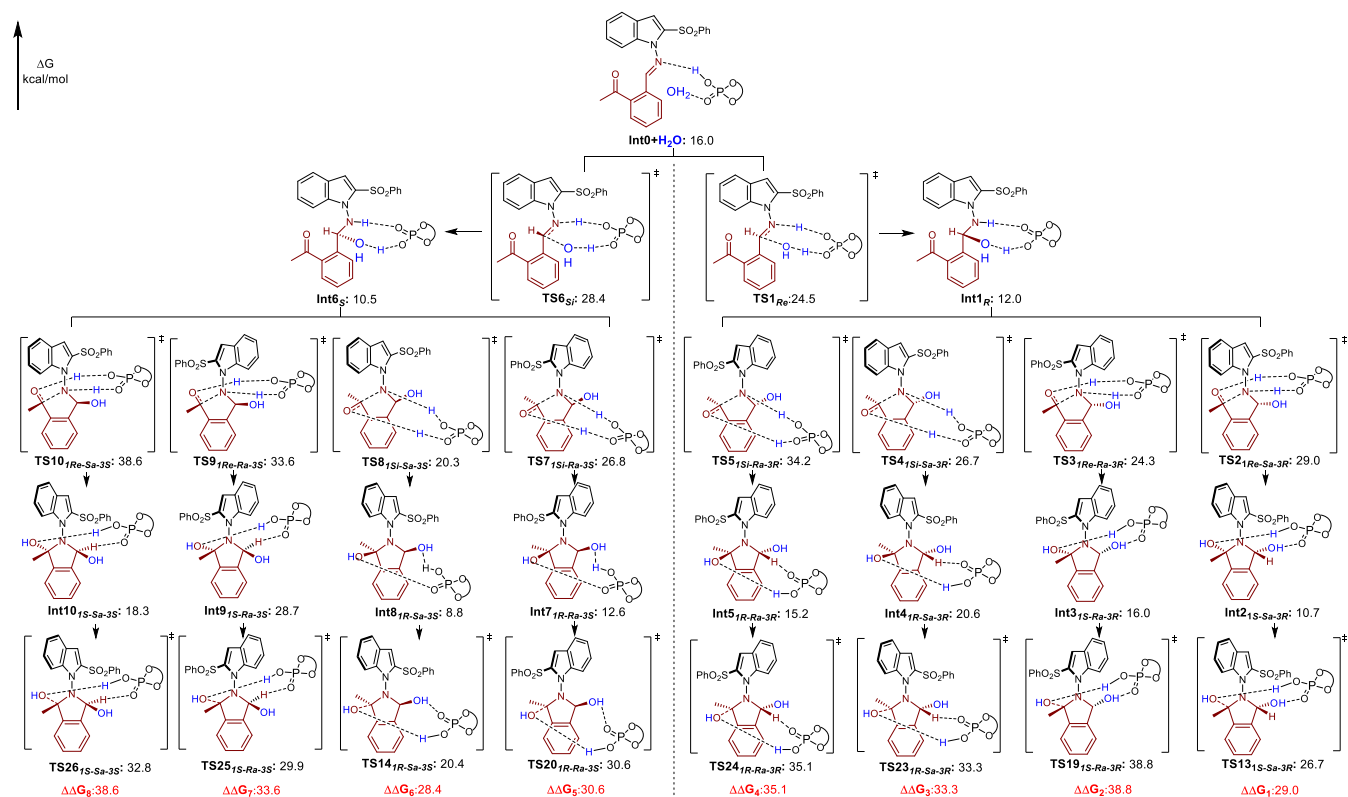

**Figure S3.** Free energy diagrams of chiral phosphoric acid-catalyzed stepwise mechanism in asymmetric annulation and dehydration. The meaning for the corner mark in the structure name: **Re**: the rectus face; **Si**: the sinister face; **Ra**: the potential **R**-configuration for the *N-N* axis; **Sa**: the potential **S**-configuration for the *N-N* axis; **R**: the **R**-configuration for the central chirality; **S**: the **S**-configuration for the central chirality.

**Table S6. Thermal correction of Gibbs free energy (TCG, hartree) and total electronic energies (E, hartree) in toluene solvent for all species involved in the DFT study**

| Compounds                    | TCG      | E            | Compounds                     | TCG      | E            |
|------------------------------|----------|--------------|-------------------------------|----------|--------------|
| <b>H<sub>2</sub>O</b>        | 0.003949 | -76.433213   | <b>TS11</b> <i>IRe-Sa-3Re</i> | 1.235706 | -4279.052964 |
| <b>CPA</b>                   | 0.867742 | -2582.036042 | <b>TS12</b> <i>ISi-Sa-3Si</i> | 1.238793 | -4279.054653 |
| <b>Int0</b>                  | 1.205454 | -4202.630730 | <b>TS13</b> <i>IS-Sa-3R</i>   | 1.239669 | -4279.051586 |
| <b>Int0+H<sub>2</sub>O</b>   | 1.231781 | -4279.060820 | <b>TS14</b> <i>IR-Sa-3S</i>   | 1.237124 | -4279.059093 |
| <b>TS1</b> <i>Re</i>         | 1.233156 | -4279.048592 | <b>TS15</b> <i>P-Re</i>       | 1.206928 | -4202.589283 |
| <b>Int1</b> <i>R</i>         | 1.238581 | -4279.073964 | <b>TS16</b> <i>P-Si</i>       | 1.210572 | -4202.587333 |
| <b>TS2</b> <i>1Re-Sa-3R</i>  | 1.241509 | -4279.049869 | <b>Int11</b> <i>P</i>         | 1.211006 | -4202.618837 |
| <b>TS3</b> <i>1Re-Ra-3R</i>  | 1.242254 | -4279.057850 | <b>(P,R)</b> - <b>3a</b>      | 0.314580 | -1620.620748 |
| <b>TS4</b> <i>1Si-Sa-3R</i>  | 1.240384 | -4279.052382 | <b>(P,S)</b> - <b>3a</b>      | 0.313841 | -1620.621035 |
| <b>TS5</b> <i>1Si-Ra-3R</i>  | 1.239710 | -4279.039820 | <b>TS17</b> <i>1Re-Ra-3Re</i> | 1.239719 | -4279.058216 |
| <b>Int2</b> <i>IS-Sa-3R</i>  | 1.239899 | -4279.077374 | <b>TS18</b> <i>1Si-Ra-3Si</i> | 1.241763 | -4279.047623 |
| <b>Int3</b> <i>IS-Ra-3R</i>  | 1.245549 | -4279.074633 | <b>TS19</b> <i>IS-Ra-3R</i>   | 1.238808 | -4279.031563 |
| <b>Int4</b> <i>IR-Sa-3R</i>  | 1.240917 | -4279.062622 | <b>TS20</b> <i>1R-Ra-3S</i>   | 1.240898 | -4279.046617 |
| <b>Int5</b> <i>IR-Ra-3R</i>  | 1.240375 | -4279.070664 | <b>TS21</b> <i>M-Re</i>       | 1.203059 | -4202.586698 |
| <b>TS6</b> <i>Si</i>         | 1.237785 | -4279.047129 | <b>TS22</b> <i>M-Si</i>       | 1.208337 | -4202.588708 |
| <b>Int6</b> <i>S</i>         | 1.236214 | -4279.074054 | <b>Int12</b> <i>M</i>         | 1.207652 | -4202.612865 |
| <b>TS7</b> <i>1Si-Ra-3S</i>  | 1.241408 | -4279.053245 | <b>(M,R)</b> - <b>3a</b>      | 0.314835 | -1620.623487 |
| <b>TS8</b> <i>1Si-Sa-3S</i>  | 1.237443 | -4279.059684 | <b>(M,S)</b> - <b>3a</b>      | 0.314751 | -1620.626210 |
| <b>TS9</b> <i>1Re-Ra-3S</i>  | 1.242373 | -4279.043349 | <b>TS23</b> <i>1R-Sa-3R</i>   | 1.240180 | -4279.041600 |
| <b>TS10</b> <i>1Re-Sa-3S</i> | 1.240434 | -4279.033492 | <b>TS24</b> <i>1Si-Ra-3R</i>  | 1.239553 | -4279.038123 |
| <b>Int7</b> <i>IR-Ra-3S</i>  | 1.243725 | -4279.078221 | <b>TS25</b> <i>IS-Ra-3S</i>   | 1.240206 | -4279.047135 |
| <b>Int8</b> <i>IR-Sa-3S</i>  | 1.242056 | -4279.082552 | <b>TS26</b> <i>IS-Sa-3S</i>   | 1.240383 | -4279.042596 |
| <b>Int9</b> <i>IS-Ra-3S</i>  | 1.243909 | -4279.052691 |                               |          |              |
| <b>Int10</b> <i>IS-Sa-3S</i> | 1.243293 | -4279.068737 |                               |          |              |

## Cartesian coordinates for all optimized geometries

### H<sub>2</sub>O

|   |            |             |             |
|---|------------|-------------|-------------|
| O | 0.00000000 | 0.00000000  | 0.11916800  |
| H | 0.00000000 | 0.75600100  | -0.47667000 |
| H | 0.00000000 | -0.75600100 | -0.47667000 |

### CPA

|   |             |             |             |
|---|-------------|-------------|-------------|
| C | 1.52903200  | 1.14288900  | 0.17921100  |
| C | 0.68603600  | 2.17113300  | -0.19057200 |
| C | 1.21758500  | 3.20733300  | -1.03261500 |
| C | 2.60852600  | 3.19263800  | -1.34609400 |
| C | 3.42000600  | 2.10791000  | -0.91447700 |
| C | 2.89599000  | 1.05211100  | -0.20945100 |
| H | -0.66292700 | 4.23281600  | -1.40342800 |
| C | 0.40999800  | 4.23534500  | -1.59398900 |
| C | 3.15438000  | 4.23482800  | -2.14469200 |
| H | 4.47372900  | 2.09587100  | -1.19914900 |
| C | 2.35444800  | 5.23184900  | -2.64436500 |
| C | 0.96429600  | 5.21948700  | -2.37686700 |
| H | 4.22359200  | 4.21568700  | -2.36511600 |
| H | 2.78233800  | 6.02346200  | -3.26078300 |
| H | 0.32526600  | 5.99515300  | -2.80098200 |
| C | -0.73863600 | 2.13323400  | 0.24276700  |
| C | -1.36809400 | 3.23647100  | 0.91434700  |
| C | -1.49104700 | 0.99239400  | 0.02576100  |
| C | -0.64864900 | 4.38992200  | 1.33515800  |
| C | -2.76166100 | 3.16565800  | 1.20290100  |
| C | -2.87182200 | 0.88238400  | 0.34685700  |
| C | -1.28923700 | 5.43008900  | 1.96420300  |
| H | 0.42640000  | 4.43884000  | 1.16242100  |
| C | -3.39898800 | 4.26595800  | 1.83935000  |
| C | -3.48758400 | 1.98599100  | 0.88522100  |
| C | -2.68310900 | 5.37736900  | 2.20768600  |
| H | -0.71696600 | 6.30168000  | 2.28475000  |
| H | -4.46974800 | 4.20022100  | 2.04219800  |
| H | -4.55750600 | 1.94975800  | 1.09997500  |
| H | -3.18039500 | 6.21315000  | 2.70156300  |
| O | -0.90127300 | -0.11291400 | -0.56574400 |
| O | 1.04185900  | 0.13358400  | 0.98158000  |
| P | 0.09574700  | -1.00610800 | 0.33199400  |
| O | 0.93950200  | -1.65576900 | -0.85465800 |
| H | 1.68104200  | -2.19724700 | -0.53695600 |
| O | -0.44986700 | -1.89194800 | 1.36075000  |
| C | -3.59937600 | -0.39723300 | 0.08404400  |
| C | -3.98563200 | -0.72245800 | -1.23163500 |
| C | -3.88082700 | -1.27580800 | 1.14982100  |
| C | -4.69527400 | -1.90383900 | -1.45279900 |
| C | -4.59695000 | -2.44576800 | 0.87644600  |
| C | -5.01936100 | -2.77470300 | -0.41072400 |
| H | -4.99998100 | -2.15332700 | -2.47343700 |
| H | -4.82620300 | -3.13315000 | 1.69371500  |
| C | 3.64894800  | -0.20660800 | 0.08169700  |
| C | 4.00477700  | -1.06831700 | -0.98696800 |
| C | 3.92402800  | -0.58265600 | 1.41157200  |
| C | 4.63693600  | -2.27875000 | -0.68942600 |
| C | 4.56652800  | -1.80203400 | 1.65296400  |
| C | 4.92972500  | -2.66513000 | 0.62214900  |
| H | 4.91489800  | -2.94307100 | -1.51132100 |
| H | 4.78770100  | -2.09100300 | 2.68379800  |
| C | -3.64656200 | 0.16593600  | -2.41926200 |
| C | -4.91291200 | 0.68580300  | -3.10647400 |
| C | -2.73131500 | -0.56270200 | -3.40871400 |
| H | -3.09606900 | 1.04200200  | -2.04731400 |
| H | -5.55196500 | 1.23167600  | -2.39748000 |
| H | -4.65395000 | 1.36423300  | -3.93293500 |

|             |             |             |             |
|-------------|-------------|-------------|-------------|
| H           | -5.50517100 | -0.14230500 | -3.52507100 |
| H           | -1.81478500 | -0.90565900 | -2.90914600 |
| H           | -3.23733800 | -1.43885400 | -3.84277900 |
| H           | -2.44868100 | 0.10588100  | -4.23567800 |
| C           | -3.44516500 | -0.97719500 | 2.57827500  |
| C           | -2.94131300 | -2.21856600 | 3.31831100  |
| C           | -4.58159900 | -0.31352400 | 3.36541500  |
| H           | -2.60231500 | -0.27148900 | 2.52592800  |
| H           | -2.16022700 | -2.72292600 | 2.73655400  |
| H           | -2.51218400 | -1.92097900 | 4.28650100  |
| H           | -3.75828300 | -2.92536900 | 3.52948500  |
| H           | -4.91382400 | 0.62275700  | 2.89646900  |
| H           | -5.45036300 | -0.98815400 | 3.42002500  |
| H           | -4.25951200 | -0.08687100 | 4.39278700  |
| C           | -5.79062400 | -4.05409100 | -0.67650100 |
| C           | -5.00166600 | -5.00163800 | -1.58483500 |
| C           | -7.17774200 | -3.76350600 | -1.25612700 |
| H           | -5.92813500 | -4.55463700 | 0.29564400  |
| H           | -4.01384600 | -5.22635400 | -1.15897000 |
| H           | -5.54427300 | -5.94827800 | -1.72627700 |
| H           | -4.84615900 | -4.55142400 | -2.57741800 |
| H           | -7.75284800 | -3.09996800 | -0.59514300 |
| H           | -7.09638200 | -3.27282800 | -2.23828100 |
| H           | -7.74590500 | -4.69562800 | -1.39318600 |
| C           | 3.74244500  | -0.72113000 | -2.44845700 |
| C           | 3.18847400  | -1.89315100 | -3.26461700 |
| C           | 5.02462700  | -0.19255300 | -3.10469300 |
| H           | 2.98583100  | 0.07505900  | -2.47657800 |
| H           | 2.27121400  | -2.29951400 | -2.81846900 |
| H           | 2.94091600  | -1.55035100 | -4.27967800 |
| H           | 3.92225700  | -2.70623100 | -3.36829400 |
| H           | 5.43812500  | 0.66896000  | -2.56288300 |
| H           | 5.79761700  | -0.97680500 | -3.11585700 |
| H           | 4.83203800  | 0.11224300  | -4.14398600 |
| C           | 3.58099600  | 0.30499200  | 2.59787800  |
| C           | 4.85946500  | 0.88190700  | 3.21647800  |
| C           | 2.73858300  | -0.43267900 | 3.64261300  |
| H           | 2.98502900  | 1.15217300  | 2.23268300  |
| H           | 5.43931200  | 1.44753500  | 2.47283100  |
| H           | 4.61409800  | 1.55612900  | 4.05028800  |
| H           | 5.50328800  | 0.07931000  | 3.60814100  |
| H           | 1.83388600  | -0.86097500 | 3.18977600  |
| H           | 3.31001200  | -1.24440700 | 4.11813100  |
| H           | 2.43027500  | 0.26188900  | 4.43776200  |
| C           | 5.61775100  | -3.98609800 | 0.90931300  |
| C           | 7.01403500  | -4.03633200 | 0.28236500  |
| C           | 4.76412500  | -5.17186900 | 0.45036900  |
| H           | 5.73452100  | -4.05644700 | 2.00270900  |
| H           | 7.63366800  | -3.19586300 | 0.62504100  |
| H           | 7.52433900  | -4.97438200 | 0.54598600  |
| H           | 6.95257900  | -3.98524300 | -0.81560200 |
| H           | 3.76993300  | -5.15078800 | 0.91877700  |
| H           | 4.62570200  | -5.15573700 | -0.64179500 |
| H           | 5.24878800  | -6.12398300 | 0.71182700  |
| <b>Int0</b> |             |             |             |
| S           | 5.77245400  | 0.82835200  | 2.05155100  |
| O           | 6.57863700  | -0.21194600 | 2.67787000  |
| O           | 4.49031500  | 1.22518900  | 2.61963800  |
| O           | 1.20306600  | 2.36820400  | -2.78712300 |
| N           | 4.60663600  | 0.82304900  | -0.47660200 |
| N           | 3.83298200  | 1.88839400  | -0.10480300 |
| C           | 6.79038800  | 2.28635400  | 1.90853800  |
| C           | 8.14253200  | 2.17572300  | 2.22229800  |
| H           | 8.54126400  | 1.21001400  | 2.53510400  |
| C           | 8.94273300  | 3.31370000  | 2.13683900  |
| H           | 10.00357600 | 3.25017100  | 2.38219900  |

|   |             |             |             |
|---|-------------|-------------|-------------|
| C | 8.38605700  | 4.53034000  | 1.74206400  |
| H | 9.01676800  | 5.41817700  | 1.67525100  |
| C | 7.02753200  | 4.62061200  | 1.43305000  |
| H | 6.59862700  | 5.57492200  | 1.12510500  |
| C | 6.21245300  | 3.49436100  | 1.51996000  |
| H | 5.15089500  | 3.53293300  | 1.27115200  |
| C | 5.53701700  | 0.28221600  | 0.38340900  |
| C | 6.17031200  | -0.78407700 | -0.19632900 |
| H | 6.92758700  | -1.39539600 | 0.28610600  |
| C | 5.61612300  | -0.90776800 | -1.51098500 |
| C | 4.62965000  | 0.10467900  | -1.65670000 |
| C | 3.91220100  | 0.28491900  | -2.85274800 |
| H | 3.15886000  | 1.06502600  | -2.96605500 |
| C | 4.20221100  | -0.58260100 | -3.89143600 |
| H | 3.66329200  | -0.47341300 | -4.83389600 |
| C | 5.17333200  | -1.60236800 | -3.76720300 |
| H | 5.36380900  | -2.26213600 | -4.61508700 |
| C | 5.88058800  | -1.77126700 | -2.59214200 |
| H | 6.63827900  | -2.55130100 | -2.49858600 |
| C | 2.61006200  | 1.88438500  | -0.46661300 |
| H | 2.14735800  | 1.07473900  | -1.04135200 |
| C | 1.75980600  | 2.99874000  | -0.00403800 |
| C | 2.04401200  | 3.58904600  | 1.23393400  |
| H | 2.86050400  | 3.17263400  | 1.82927400  |
| C | 1.28010600  | 4.65710600  | 1.69721900  |
| H | 1.51664000  | 5.11516400  | 2.65867200  |
| C | 0.20531300  | 5.12708200  | 0.94230600  |
| H | -0.39658900 | 5.96368900  | 1.30311400  |
| C | -0.11928500 | 4.50574300  | -0.26022400 |
| H | -0.98365100 | 4.85043500  | -0.82963900 |
| C | 0.65846100  | 3.45317200  | -0.75217300 |
| C | 0.34444000  | 2.85437200  | -2.08882400 |
| C | -1.09602500 | 2.91189400  | -2.55067400 |
| H | -1.36769200 | 3.93916900  | -2.83934400 |
| H | -1.79525600 | 2.61896500  | -1.75050000 |
| H | -1.19172600 | 2.28463800  | -3.44845100 |
| C | -3.59752900 | -0.18832300 | 0.60572400  |
| C | -3.76247300 | -1.44220900 | 1.15314000  |
| C | -5.09912900 | -1.96495200 | 1.24853100  |
| C | -6.19447800 | -1.11984200 | 0.90723300  |
| C | -5.94816600 | 0.19628400  | 0.42915300  |
| C | -4.67265200 | 0.66478800  | 0.23036000  |
| H | -4.54731900 | -3.97548100 | 1.86628900  |
| C | -5.37561900 | -3.30362600 | 1.64244200  |
| C | -7.52174500 | -1.61450900 | 1.02681200  |
| H | -6.79899100 | 0.84248400  | 0.20514800  |
| C | -7.75780200 | -2.90379900 | 1.43423900  |
| C | -6.66947900 | -3.75899500 | 1.73046000  |
| H | -8.35011300 | -0.94954600 | 0.77435200  |
| H | -8.77967400 | -3.27614000 | 1.51674100  |
| H | -6.85857700 | -4.79149100 | 2.02705400  |
| C | -2.57662300 | -2.22827500 | 1.59088600  |
| C | -2.48885400 | -2.78326600 | 2.91299100  |
| C | -1.52932800 | -2.45666900 | 0.71832100  |
| C | -3.41787100 | -2.46421300 | 3.94220500  |
| C | -1.41599000 | -3.66861900 | 3.21840600  |
| C | -0.46130900 | -3.35954600 | 0.98887500  |
| C | -3.30034500 | -3.01970100 | 5.19357000  |
| H | -4.22372600 | -1.76030800 | 3.73337900  |
| C | -1.33079500 | -4.23945600 | 4.51795900  |
| C | -0.44791900 | -3.96552200 | 2.22299500  |
| C | -2.25295100 | -3.92694100 | 5.48503500  |
| H | -4.01717600 | -2.75387700 | 5.97164900  |
| H | -0.50731000 | -4.92316500 | 4.73283100  |
| H | 0.34173400  | -4.68558300 | 2.45013200  |
| H | -2.17477700 | -4.36433600 | 6.48112300  |

|   |             |             |             |
|---|-------------|-------------|-------------|
| O | -1.54979800 | -1.87134400 | -0.53739900 |
| O | -2.31858000 | 0.31007900  | 0.44029200  |
| P | -1.41880400 | -0.28632300 | -0.75772300 |
| O | -2.29736800 | -0.15776300 | -2.08402700 |
| H | -1.97590900 | 0.56644000  | -2.64137200 |
| O | -0.09864500 | 0.35435300  | -0.80962600 |
| C | 0.54404600  | -3.68760300 | -0.06645200 |
| C | 0.11651500  | -4.36216700 | -1.23200700 |
| C | 1.90456000  | -3.35207900 | 0.10262400  |
| C | 1.05830900  | -4.68015500 | -2.21038800 |
| C | 2.80397900  | -3.67467200 | -0.92098400 |
| C | 2.40504900  | -4.33922200 | -2.07942900 |
| H | 0.72775000  | -5.21868900 | -3.10280900 |
| H | 3.85397100  | -3.38912300 | -0.81942400 |
| C | -4.39380600 | 2.03520900  | -0.29819400 |
| C | -4.66489700 | 2.35807900  | -1.64824600 |
| C | -3.86867600 | 3.01223500  | 0.56918900  |
| C | -4.45402500 | 3.66967700  | -2.07625200 |
| C | -3.66784300 | 4.31275300  | 0.08835000  |
| C | -3.97183400 | 4.66970900  | -1.22437700 |
| H | -4.66749500 | 3.92741500  | -3.11745600 |
| H | -3.26986400 | 5.06160700  | 0.77625400  |
| C | -1.32156800 | -4.81624700 | -1.44770800 |
| C | -1.41037700 | -6.34647300 | -1.41940800 |
| C | -1.91436800 | -4.24936800 | -2.74096500 |
| H | -1.93837200 | -4.44685600 | -0.61739600 |
| H | -1.01425200 | -6.74687500 | -0.47502000 |
| H | -2.45473800 | -6.67627300 | -1.52565700 |
| H | -0.82986900 | -6.79015400 | -2.24271600 |
| H | -1.87216500 | -3.15184900 | -2.74176700 |
| H | -1.37200800 | -4.61944900 | -3.62439700 |
| H | -2.96637100 | -4.55497700 | -2.84418600 |
| C | 2.40898800  | -2.55659700 | 1.30080700  |
| C | 2.39131500  | -1.06799300 | 0.94483900  |
| C | 3.80337200  | -2.97599000 | 1.76965000  |
| H | 1.71936000  | -2.71142800 | 2.14089500  |
| H | 1.37361000  | -0.70718000 | 0.74106900  |
| H | 2.83973500  | -0.45294500 | 1.74087400  |
| H | 2.97579100  | -0.92617000 | 0.02320300  |
| H | 3.85943400  | -4.05551100 | 1.97414600  |
| H | 4.57115300  | -2.72490900 | 1.02309500  |
| H | 4.07179800  | -2.42856600 | 2.68499300  |
| C | 3.41160300  | -4.71780300 | -3.14893000 |
| C | 2.98658500  | -4.23255700 | -4.53640600 |
| C | 3.66323200  | -6.22934900 | -3.14787700 |
| H | 4.35562500  | -4.21250600 | -2.89020100 |
| H | 2.78883900  | -3.15131700 | -4.53175600 |
| H | 3.77369200  | -4.44134300 | -5.27723700 |
| H | 2.07258700  | -4.74518100 | -4.87399500 |
| H | 4.00342200  | -6.57309600 | -2.16090400 |
| H | 2.73962000  | -6.77603700 | -3.39462000 |
| H | 4.42647500  | -6.50035800 | -3.89294600 |
| C | -5.18664100 | 1.32483500  | -2.63826600 |
| C | -4.49913200 | 1.41705200  | -4.00415100 |
| C | -6.70376500 | 1.45073200  | -2.82250900 |
| H | -4.96696200 | 0.32978000  | -2.22557500 |
| H | -3.40494800 | 1.46544100  | -3.91181100 |
| H | -4.75077400 | 0.53913200  | -4.61567300 |
| H | -4.82021000 | 2.30928800  | -4.56228900 |
| H | -7.24306200 | 1.31842300  | -1.87562000 |
| H | -6.95890300 | 2.44666900  | -3.21686900 |
| H | -7.07127600 | 0.69616100  | -3.53365600 |
| C | -3.56670600 | 2.72009300  | 2.03161900  |
| C | -4.55633400 | 3.45740300  | 2.94062200  |
| C | -2.11868600 | 3.05128600  | 2.39611600  |
| H | -3.70824100 | 1.64598100  | 2.20717800  |

|   |             |            |             |
|---|-------------|------------|-------------|
| H | -5.59406500 | 3.17976200 | 2.70511600  |
| H | -4.36387500 | 3.21510500 | 3.99614800  |
| H | -4.46258700 | 4.54793700 | 2.82146600  |
| H | -1.41229200 | 2.56114000 | 1.70971700  |
| H | -1.93602000 | 4.13562800 | 2.35874300  |
| H | -1.89749600 | 2.71424500 | 3.41953000  |
| C | -3.82747100 | 6.08922500 | -1.75428200 |
| C | -3.10258700 | 7.04062500 | -0.80568700 |
| C | -5.20472200 | 6.66250400 | -2.11408900 |
| H | -3.23915400 | 6.02435000 | -2.68741500 |
| H | -2.10299600 | 6.67619300 | -0.52851800 |
| H | -2.98011100 | 8.02451000 | -1.27934500 |
| H | -3.67987800 | 7.18770200 | 0.11983800  |
| H | -5.73424900 | 6.02695000 | -2.83682000 |
| H | -5.82887800 | 6.73617200 | -1.21056500 |
| H | -5.10646500 | 7.66802700 | -2.54861700 |

### Int0+H<sub>2</sub>O

|   |             |             |             |
|---|-------------|-------------|-------------|
| S | 5.14617500  | 0.24916300  | -0.85346200 |
| O | 5.40539600  | -0.27773100 | 0.48764000  |
| O | 4.71185300  | 1.63398400  | -1.01255000 |
| O | 3.52301300  | -3.25368000 | 3.06114400  |
| N | 2.80277300  | -1.18420800 | -1.04323100 |
| N | 2.28464800  | -0.60198300 | 0.10789800  |
| C | 6.60200100  | 0.01861800  | -1.84472400 |
| C | 7.45785200  | -1.03840400 | -1.54343900 |
| H | 7.23270600  | -1.69455200 | -0.70143300 |
| C | 8.59048400  | -1.21899900 | -2.33291900 |
| H | 9.27734800  | -2.03828800 | -2.11813400 |
| C | 8.84717500  | -0.34892700 | -3.39487600 |
| H | 9.73607500  | -0.49577000 | -4.01010100 |
| C | 7.98186200  | 0.70990000  | -3.67300300 |
| H | 8.19539600  | 1.38962200  | -4.49858400 |
| C | 6.84438100  | 0.90476200  | -2.89088900 |
| H | 6.15216300  | 1.72856700  | -3.07150300 |
| C | 3.98442900  | -0.82045500 | -1.65678200 |
| C | 4.04906300  | -1.36512100 | -2.91501900 |
| H | 4.88081000  | -1.27288300 | -3.60815400 |
| C | 2.82743200  | -2.09102900 | -3.10318000 |
| C | 2.06537000  | -1.95165500 | -1.91750100 |
| C | 0.80999800  | -2.55621300 | -1.73954400 |
| H | 0.27602300  | -2.49608600 | -0.78919900 |
| C | 0.32305200  | -3.28240300 | -2.81037200 |
| H | -0.64930000 | -3.76618700 | -2.71256700 |
| C | 1.05649600  | -3.42928300 | -4.01208600 |
| H | 0.62880200  | -4.01771500 | -4.82466600 |
| C | 2.30324200  | -2.85562700 | -4.16549600 |
| H | 2.87273400  | -2.98398900 | -5.08702400 |
| C | 2.78014900  | -1.04975200 | 1.19999300  |
| H | 3.53152300  | -1.84157000 | 1.14714800  |
| C | 2.42488400  | -0.50176900 | 2.51171100  |
| C | 1.55896300  | 0.59214300  | 2.63406100  |
| H | 1.13139700  | 1.05861400  | 1.74501800  |
| C | 1.27538100  | 1.12565000  | 3.88753500  |
| H | 0.58099200  | 1.96107000  | 3.96252100  |
| C | 1.88979100  | 0.60815000  | 5.02548500  |
| H | 1.67221500  | 1.03363000  | 6.00610400  |
| C | 2.78952700  | -0.45030800 | 4.91279000  |
| H | 3.27118100  | -0.85240300 | 5.80579100  |
| C | 3.04204100  | -1.02619900 | 3.66783100  |
| C | 3.92417100  | -2.24304800 | 3.59284400  |
| C | 5.31666700  | -2.12638300 | 4.14951100  |
| H | 5.78758500  | -3.11504600 | 4.18066100  |
| H | 5.32361400  | -1.65665800 | 5.14185400  |
| H | 5.88069300  | -1.46336500 | 3.47321000  |
| C | -2.23090900 | 2.22816300  | -0.19281300 |
| C | -3.41654800 | 1.97714400  | -0.85755800 |



|   |             |             |             |
|---|-------------|-------------|-------------|
| C | -3.78539100 | 2.85667300  | -1.93484900 |
| C | -3.00042300 | 4.02127100  | -2.17635700 |
| C | -1.81985300 | 4.24404100  | -1.41793400 |
| C | -1.38518700 | 3.33857500  | -0.48478300 |
| H | -5.46836800 | 1.68519600  | -2.65728000 |
| C | -4.88747100 | 2.59670300  | -2.79644800 |
| C | -3.37639700 | 4.91369800  | -3.21691200 |
| H | -1.20947500 | 5.12460900  | -1.63228400 |
| C | -4.46412200 | 4.65079000  | -4.01189900 |
| C | -5.21642900 | 3.46971500  | -3.80590500 |
| H | -2.76955100 | 5.80658400  | -3.38034700 |
| H | -4.73989400 | 5.33860300  | -4.81234800 |
| H | -6.06099800 | 3.24539300  | -4.45885500 |
| C | -4.23486600 | 0.79036000  | -0.48383300 |
| C | -5.63787400 | 0.87872000  | -0.18009200 |
| C | -3.63321400 | -0.44908100 | -0.39318500 |
| C | -6.32455400 | 2.12073800  | -0.07818500 |
| C | -6.37285200 | -0.32051400 | 0.05319900  |
| C | -4.33344100 | -1.64782800 | -0.07222300 |
| C | -7.67103700 | 2.16360100  | 0.19387700  |
| H | -5.76716600 | 3.04784700  | -0.21147700 |
| C | -7.76767100 | -0.24348600 | 0.31717700  |
| C | -5.69338300 | -1.56976900 | 0.08582600  |
| C | -8.40767000 | 0.96923300  | 0.37992900  |
| H | -8.17501800 | 3.12781500  | 0.27346600  |
| H | -8.31679400 | -1.17235600 | 0.48416700  |
| H | -6.26370700 | -2.47514900 | 0.30477400  |
| H | -9.47717900 | 1.01675500  | 0.58895100  |
| O | -2.28774100 | -0.57110200 | -0.66829500 |
| O | -1.82496600 | 1.37021200  | 0.81694200  |
| P | -1.16155000 | -0.04147600 | 0.35823900  |
| O | 0.00612100  | 0.31561500  | -0.60966100 |
| H | 0.93777700  | 0.05095200  | -0.25073900 |
| O | -0.83004900 | -0.89828100 | 1.51477700  |
| C | -3.51114600 | -2.87025300 | 0.17373100  |
| C | -3.06626500 | -3.68062200 | -0.89507500 |
| C | -3.06231200 | -3.11560500 | 1.49025900  |
| C | -2.14213400 | -4.69430000 | -0.62652700 |
| C | -2.11346700 | -4.12663100 | 1.68706600  |
| C | -1.61942000 | -4.91043300 | 0.64946100  |
| H | -1.81332500 | -5.33098500 | -1.45248400 |
| H | -1.73135200 | -4.29584900 | 2.69789400  |
| C | -0.08923100 | 3.48705400  | 0.24402800  |
| C | 1.15070800  | 3.16307200  | -0.34741000 |
| C | -0.14149600 | 3.92723600  | 1.58976100  |
| C | 2.30026900  | 3.23375200  | 0.46079900  |
| C | 1.03957800  | 4.04040400  | 2.31931600  |
| C | 2.27337900  | 3.66589000  | 1.78197100  |
| H | 3.24578000  | 2.90832600  | 0.02553300  |
| H | 0.99954000  | 4.39929200  | 3.35318800  |
| C | -3.58365900 | -3.57806100 | -2.32918600 |
| C | -3.37328600 | -2.23377000 | -3.03705400 |
| C | -5.04515900 | -4.02970800 | -2.43372300 |
| H | -2.99009300 | -4.31702800 | -2.89278800 |
| H | -2.36251700 | -1.83779100 | -2.86995400 |
| H | -3.52022600 | -2.36867500 | -4.11937200 |
| H | -4.09733900 | -1.47625200 | -2.70523600 |
| H | -5.18870700 | -5.01780200 | -1.97374200 |
| H | -5.71303100 | -3.31482800 | -1.93237000 |
| H | -5.35172500 | -4.08986900 | -3.48908700 |
| C | -3.60199400 | -2.46119000 | 2.76771400  |
| C | -4.88855700 | -3.18141300 | 3.19748100  |
| C | -3.79989500 | -0.94217500 | 2.84162700  |
| H | -2.84023000 | -2.69241500 | 3.52844700  |
| H | -4.74306300 | -4.27027900 | 3.23676400  |
| H | -5.21016900 | -2.83493700 | 4.19141400  |

|                         |              |             |             |
|-------------------------|--------------|-------------|-------------|
| H                       | -5.70436200  | -2.97250500 | 2.48951200  |
| H                       | -2.90831400  | -0.39957100 | 2.50900900  |
| H                       | -4.67153900  | -0.58913300 | 2.27523700  |
| H                       | -3.97354800  | -0.67304000 | 3.89506200  |
| C                       | -0.59135300  | -5.99254700 | 0.91596100  |
| C                       | 0.55953200   | -5.96885100 | -0.09021200 |
| C                       | -1.26458600  | -7.36865500 | 0.96314700  |
| H                       | -0.16436200  | -5.77793500 | 1.90836400  |
| H                       | 1.04121300   | -4.98232200 | -0.08715400 |
| H                       | 1.30948400   | -6.73003000 | 0.17343500  |
| H                       | 0.21007400   | -6.19258400 | -1.11062200 |
| H                       | -2.06579500  | -7.39591700 | 1.71571600  |
| H                       | -1.71259000  | -7.61104600 | -0.01341300 |
| H                       | -0.53272100  | -8.15413000 | 1.20498800  |
| C                       | 1.44437400   | 2.71715800  | -1.79017800 |
| C                       | 2.39184000   | 3.73201700  | -2.45154700 |
| C                       | 0.30849400   | 2.41960700  | -2.77275700 |
| H                       | 2.01843600   | 1.78065000  | -1.67017000 |
| H                       | 2.65896300   | 3.39115200  | -3.46313700 |
| H                       | 1.89519200   | 4.71123100  | -2.54262200 |
| H                       | 3.32066700   | 3.86585900  | -1.88286700 |
| H                       | -0.46941000  | 1.76984300  | -2.36070900 |
| H                       | -0.16044300  | 3.34150000  | -3.14453100 |
| H                       | 0.74470300   | 1.90397800  | -3.64169500 |
| C                       | -1.45250300  | 4.31346100  | 2.26280100  |
| C                       | -1.49131300  | 5.81849900  | 2.54718500  |
| C                       | -1.70804100  | 3.49782100  | 3.53290000  |
| H                       | -2.27609500  | 4.09433800  | 1.57045900  |
| H                       | -1.35420000  | 6.39696500  | 1.62218400  |
| H                       | -2.45434600  | 6.10495500  | 2.99562000  |
| H                       | -0.69177700  | 6.10781100  | 3.24665400  |
| H                       | -1.68571900  | 2.42052800  | 3.31357400  |
| H                       | -0.95738800  | 3.71886000  | 4.30902000  |
| H                       | -2.69459500  | 3.74159100  | 3.95405600  |
| C                       | 3.53376200   | 3.75872600  | 2.62295400  |
| C                       | 4.14880200   | 5.15784500  | 2.49468700  |
| C                       | 4.56548700   | 2.67978100  | 2.29253700  |
| H                       | 3.22315100   | 3.62162300  | 3.67368600  |
| H                       | 3.42529800   | 5.93866500  | 2.76975100  |
| H                       | 5.03371700   | 5.25911200  | 3.14093100  |
| H                       | 4.45980200   | 5.33753400  | 1.45413000  |
| H                       | 4.13103200   | 1.67059400  | 2.34540600  |
| H                       | 4.97517000   | 2.80238700  | 1.27901800  |
| H                       | 5.40581400   | 2.73018400  | 3.00075400  |
| O                       | 0.98691000   | -3.12461800 | 1.48682400  |
| H                       | 1.56822500   | -3.22466300 | 2.25254200  |
| H                       | 0.31616300   | -2.45993600 | 1.72111200  |
| <b>TS1<sub>Re</sub></b> |              |             |             |
| S                       | -5.42266400  | -0.58012800 | -0.43773000 |
| O                       | -5.45198600  | -0.06188100 | 0.93502300  |
| O                       | -5.03288800  | -1.96010900 | -0.67621800 |
| O                       | -3.44770800  | 2.21182800  | 3.15998200  |
| N                       | -3.03219600  | 0.55017100  | -1.17561400 |
| N                       | -2.41941300  | -0.11043500 | -0.13732900 |
| C                       | -7.01762400  | -0.29307400 | -1.16342300 |
| C                       | -7.79163800  | 0.76568000  | -0.69391200 |
| H                       | -7.41919400  | 1.38977600  | 0.11968900  |
| C                       | -9.03335900  | 0.99051700  | -1.28372200 |
| H                       | -9.65941800  | 1.81267500  | -0.93540800 |
| C                       | -9.47650200  | 0.15996400  | -2.31507500 |
| H                       | -10.45047100 | 0.34023300  | -2.77238600 |
| C                       | -8.68913900  | -0.90208700 | -2.76288700 |
| H                       | -9.04781800  | -1.55052500 | -3.56290300 |
| C                       | -7.44360100  | -1.13864300 | -2.18423200 |
| H                       | -6.80500600  | -1.96431300 | -2.50188500 |
| C                       | -4.39056100  | 0.48625200  | -1.41471200 |

|   |             |             |             |
|---|-------------|-------------|-------------|
| C | -4.72711800 | 1.31995200  | -2.44799300 |
| H | -5.72400700 | 1.46443400  | -2.85506600 |
| C | -3.50519200 | 1.93677700  | -2.88064100 |
| C | -2.46114000 | 1.44218300  | -2.06055300 |
| C | -1.12384300 | 1.83478600  | -2.21211900 |
| H | -0.33485200 | 1.44057800  | -1.57143000 |
| C | -0.86016000 | 2.73814600  | -3.22652100 |
| H | 0.16937800  | 3.05912800  | -3.38653700 |
| C | -1.88155900 | 3.25379200  | -4.05680700 |
| H | -1.62004700 | 3.96537300  | -4.84090800 |
| C | -3.19810800 | 2.86576800  | -3.89383700 |
| H | -3.98591400 | 3.26150300  | -4.53633000 |
| C | -2.62176900 | 0.39104000  | 1.08820800  |
| H | -3.46420600 | 1.07736800  | 1.13756000  |
| C | -2.40119900 | -0.44772600 | 2.28774500  |
| C | -1.61893100 | -1.60464000 | 2.24135100  |
| H | -1.11322300 | -1.90481700 | 1.31858800  |
| C | -1.48402800 | -2.39645900 | 3.37966200  |
| H | -0.85515500 | -3.28376400 | 3.33161000  |
| C | -2.14594300 | -2.05914100 | 4.55716100  |
| H | -2.03810700 | -2.68392800 | 5.44459700  |
| C | -2.95280000 | -0.92478300 | 4.60056700  |
| H | -3.47305200 | -0.66458900 | 5.52353400  |
| C | -3.07194600 | -0.10223400 | 3.47926300  |
| C | -3.88892400 | 1.15739900  | 3.57091600  |
| C | -5.28234900 | 1.04592300  | 4.12044200  |
| H | -5.69265500 | 2.04703800  | 4.29213500  |
| H | -5.32377100 | 0.44234800  | 5.03582300  |
| H | -5.87233700 | 0.52209400  | 3.35023700  |
| C | 3.09462200  | -1.79725700 | -0.17744400 |
| C | 4.16018700  | -1.05217300 | -0.64507800 |
| C | 4.98222800  | -1.62314000 | -1.68030500 |
| C | 4.76962800  | -2.97976900 | -2.06301700 |
| C | 3.66935100  | -3.69854300 | -1.52095200 |
| C | 2.78546200  | -3.10414800 | -0.65755600 |
| H | 6.13006200  | 0.16940100  | -2.12349000 |
| C | 5.98889900  | -0.88417800 | -2.36268200 |
| C | 5.60962400  | -3.56928300 | -3.04658000 |
| H | 3.48598800  | -4.72033100 | -1.86016700 |
| C | 6.59728900  | -2.83935200 | -3.66001700 |
| C | 6.77337100  | -1.47610100 | -3.32387100 |
| H | 5.43840300  | -4.61316700 | -3.31761000 |
| H | 7.23162100  | -3.29951600 | -4.41881800 |
| H | 7.53381800  | -0.88601500 | -3.83729400 |
| C | 4.38714100  | 0.32130900  | -0.11877300 |
| C | 5.67447600  | 0.76127000  | 0.34835200  |
| C | 3.33380800  | 1.21860800  | -0.07448600 |
| C | 6.77152700  | -0.12786300 | 0.52455900  |
| C | 5.86396700  | 2.13572400  | 0.67167300  |
| C | 3.49569300  | 2.58272800  | 0.31457600  |
| C | 7.99332800  | 0.33223800  | 0.95385600  |
| H | 6.63096600  | -1.18979400 | 0.32346700  |
| C | 7.14375000  | 2.58477300  | 1.09767000  |
| C | 4.75683100  | 3.02530000  | 0.62080000  |
| C | 8.19027700  | 1.70651900  | 1.23072400  |
| H | 8.81695100  | -0.37021200 | 1.08922700  |
| H | 7.27158000  | 3.64361400  | 1.33202100  |
| H | 4.90771400  | 4.07217100  | 0.89482000  |
| H | 9.16672400  | 2.05995800  | 1.56469000  |
| O | 2.08451300  | 0.82493200  | -0.48790300 |
| O | 2.29425600  | -1.28493900 | 0.81830700  |
| P | 1.16070900  | -0.17994100 | 0.42315900  |
| O | 0.11192200  | -0.74069300 | -0.49207200 |
| H | -1.50521300 | -0.58507100 | -0.36699900 |
| O | 0.72193700  | 0.47744400  | 1.70715600  |
| C | 2.27184200  | 3.43124800  | 0.41793000  |

|   |             |             |             |
|---|-------------|-------------|-------------|
| C | 1.69772200  | 4.00072400  | -0.74422400 |
| C | 1.64061200  | 3.58129900  | 1.66982200  |
| C | 0.45193300  | 4.62165600  | -0.64183600 |
| C | 0.39560900  | 4.22874300  | 1.70749800  |
| C | -0.23732000 | 4.71377400  | 0.56903600  |
| H | -0.00040900 | 5.03602200  | -1.54757300 |
| H | -0.10533700 | 4.33660300  | 2.67571100  |
| C | 1.49870100  | -3.73391300 | -0.24218100 |
| C | 0.40682500  | -3.77949200 | -1.13662100 |
| C | 1.35754400  | -4.20642000 | 1.07840200  |
| C | -0.81099700 | -4.28434600 | -0.66101500 |
| C | 0.13451100  | -4.74575600 | 1.48149700  |
| C | -0.97574700 | -4.76737600 | 0.63681400  |
| H | -1.66548400 | -4.28962200 | -1.34321700 |
| H | 0.03641800  | -5.14871100 | 2.49478800  |
| C | 2.40157400  | 4.08890200  | -2.09884400 |
| C | 2.85129200  | 2.77639700  | -2.75460900 |
| C | 3.56150400  | 5.09138600  | -2.04615300 |
| H | 1.64779600  | 4.52995600  | -2.77130800 |
| H | 2.09872800  | 1.98203200  | -2.65620600 |
| H | 3.03393600  | 2.95367100  | -3.82551600 |
| H | 3.79092800  | 2.40311200  | -2.32418300 |
| H | 3.23041900  | 6.05920800  | -1.64354800 |
| H | 4.37589600  | 4.71310600  | -1.41199100 |
| H | 3.97026100  | 5.25532800  | -3.05489800 |
| C | 2.22374700  | 3.21925800  | 3.04178600  |
| C | 2.98342900  | 4.43728100  | 3.58914200  |
| C | 3.06815500  | 1.95286700  | 3.22857500  |
| H | 1.33778700  | 3.08122500  | 3.68251800  |
| H | 2.36169400  | 5.34380400  | 3.57233100  |
| H | 3.31009900  | 4.25460400  | 4.62406900  |
| H | 3.88056300  | 4.63139800  | 2.98150900  |
| H | 2.61409600  | 1.08409600  | 2.74052300  |
| H | 4.09853100  | 2.07296900  | 2.87153800  |
| H | 3.12425000  | 1.74017700  | 4.30728800  |
| C | -1.62831200 | 5.31647900  | 0.62977000  |
| C | -2.61576700 | 4.52289700  | -0.23432000 |
| C | -1.61711800 | 6.79624400  | 0.23602600  |
| H | -1.96534500 | 5.24630700  | 1.67777500  |
| H | -2.63849300 | 3.46787400  | 0.07296300  |
| H | -3.63004100 | 4.94131000  | -0.14785900 |
| H | -2.32550400 | 4.55036300  | -1.29771300 |
| H | -0.92518200 | 7.37076800  | 0.86802900  |
| H | -1.29854000 | 6.91743000  | -0.81075300 |
| H | -2.62222500 | 7.23315500  | 0.33341300  |
| C | 0.40981000  | -3.38038000 | -2.61661900 |
| C | 0.71800000  | -4.61036800 | -3.48297400 |
| C | 1.24027300  | -2.17925800 | -3.08657300 |
| H | -0.63941600 | -3.11046100 | -2.81643800 |
| H | 0.58645500  | -4.37023300 | -4.54887300 |
| H | 1.75967400  | -4.93438400 | -3.33914700 |
| H | 0.06220300  | -5.45645100 | -3.23194500 |
| H | 1.15512600  | -1.33387800 | -2.39459900 |
| H | 2.30080900  | -2.42431100 | -3.22600700 |
| H | 0.85285600  | -1.85751900 | -4.06545900 |
| C | 2.50558600  | -4.16100500 | 2.07544000  |
| C | 3.02090000  | -5.57238400 | 2.37472100  |
| C | 2.11649500  | -3.42158400 | 3.35834800  |
| H | 3.33264500  | -3.60085400 | 1.61877900  |
| H | 3.34858100  | -6.07579600 | 1.45365800  |
| H | 3.87171100  | -5.53626400 | 3.07147300  |
| H | 2.23249200  | -6.18930000 | 2.83357500  |
| H | 1.71352700  | -2.42486800 | 3.12676500  |
| H | 1.36361200  | -3.98511800 | 3.93308700  |
| H | 2.99502300  | -3.29604300 | 4.00847800  |
| C | -2.30409700 | -5.32394000 | 1.11647700  |

|   |             |             |             |
|---|-------------|-------------|-------------|
| C | -2.48666700 | -6.76621300 | 0.62979000  |
| C | -3.49423800 | -4.45377200 | 0.70940300  |
| H | -2.25981100 | -5.34445900 | 2.21918100  |
| H | -1.65496200 | -7.40586800 | 0.95781900  |
| H | -3.42697900 | -7.19259600 | 1.01044500  |
| H | -2.51950100 | -6.79381400 | -0.47038100 |
| H | -3.36251300 | -3.40397100 | 1.00688700  |
| H | -3.65155900 | -4.46119100 | -0.37904600 |
| H | -4.41944800 | -4.82620800 | 1.17344800  |
| O | -1.36289900 | 1.78079700  | 1.34537700  |
| H | -1.70233900 | 2.24392300  | 2.13213700  |
| H | -0.45467200 | 1.31178800  | 1.56837800  |

**Int1<sub>R</sub>**

|   |             |             |             |
|---|-------------|-------------|-------------|
| S | 5.54154000  | 0.87687800  | -0.29288000 |
| O | 5.45194800  | 0.25593200  | 1.03190100  |
| O | 5.22899700  | 2.28616500  | -0.46396200 |
| O | 3.23404100  | -2.28899200 | 2.82239900  |
| N | 3.21538800  | -0.16075200 | -1.27114100 |
| N | 2.57013900  | 0.45975900  | -0.21991400 |
| C | 7.18726000  | 0.59056400  | -0.90920500 |
| C | 7.89583500  | -0.51951600 | -0.45621900 |
| H | 7.44202000  | -1.18537200 | 0.27921900  |
| C | 9.17587500  | -0.74131300 | -0.95940500 |
| H | 9.75134700  | -1.60357100 | -0.62064200 |
| C | 9.72195800  | 0.14296800  | -1.89195100 |
| H | 10.72525100 | -0.03497600 | -2.28196500 |
| C | 8.99919500  | 1.25562300  | -2.32500700 |
| H | 9.43715500  | 1.94584800  | -3.04691000 |
| C | 7.71696200  | 1.48919300  | -1.83099100 |
| H | 7.12628700  | 2.35343100  | -2.13846000 |
| C | 4.57909400  | -0.09393500 | -1.42835300 |
| C | 4.98590800  | -0.88650100 | -2.47172700 |
| H | 6.00660700  | -1.02000700 | -2.81867500 |
| C | 3.79292000  | -1.48394400 | -2.99941700 |
| C | 2.70439100  | -1.02238500 | -2.21610200 |
| C | 1.37974400  | -1.42238500 | -2.44794000 |
| H | 0.56407000  | -1.05882900 | -1.82213600 |
| C | 1.17209500  | -2.29841400 | -3.49865100 |
| H | 0.15543900  | -2.62706900 | -3.71886800 |
| C | 2.23913800  | -2.77794900 | -4.29423700 |
| H | 2.02422400  | -3.46797400 | -5.11128900 |
| C | 3.54202300  | -2.38127700 | -4.05640800 |
| H | 4.36305600  | -2.75118400 | -4.67249300 |
| C | 2.51279000  | -0.35866400 | 0.95362300  |
| H | 3.46675900  | -0.89281700 | 0.98966800  |
| C | 2.36327200  | 0.45899700  | 2.21830500  |
| C | 1.65197100  | 1.65959000  | 2.22942500  |
| H | 1.18673500  | 2.03698400  | 1.31373000  |
| C | 1.52350900  | 2.38744200  | 3.41123900  |
| H | 0.95162000  | 3.31538500  | 3.40361400  |
| C | 2.11907300  | 1.93469100  | 4.58673700  |
| H | 2.02046400  | 2.50753800  | 5.50951300  |
| C | 2.84239400  | 0.74586000  | 4.58023500  |
| H | 3.30361600  | 0.39148800  | 5.50318800  |
| C | 2.95152300  | -0.00981400 | 3.40759800  |
| C | 3.67444000  | -1.32556300 | 3.42190400  |
| C | 4.99703500  | -1.39276600 | 4.13386800  |
| H | 5.33748000  | -2.43289600 | 4.18000200  |
| H | 4.95619800  | -0.95324600 | 5.13836300  |
| H | 5.70068200  | -0.79006900 | 3.53685800  |
| C | -3.41490900 | 1.61006500  | -0.07504100 |
| C | -4.40345600 | 0.76157900  | -0.53159300 |
| C | -5.35365700 | 1.29565600  | -1.47342200 |
| C | -5.33577900 | 2.69370800  | -1.75491000 |
| C | -4.29168700 | 3.50721300  | -1.23353000 |
| C | -3.27879900 | 2.96892400  | -0.48214100 |

|   |             |             |             |
|---|-------------|-------------|-------------|
| H | -6.29239500 | -0.59351700 | -1.99861400 |
| C | -6.30111600 | 0.48444200  | -2.15737000 |
| C | -6.30762000 | 3.24047800  | -2.63648700 |
| H | -4.25630100 | 4.56297300  | -1.50814600 |
| C | -7.23461100 | 2.43571300  | -3.25100900 |
| C | -7.21530200 | 1.03959200  | -3.02093300 |
| H | -6.28629400 | 4.31471800  | -2.83098200 |
| H | -7.97052600 | 2.86498400  | -3.93212000 |
| H | -7.92737600 | 0.39579300  | -3.53897600 |
| C | -4.42227800 | -0.66182400 | -0.09045800 |
| C | -5.61347600 | -1.29823500 | 0.40810900  |
| C | -3.26207200 | -1.41424300 | -0.13750700 |
| C | -6.81004300 | -0.57948600 | 0.68326100  |
| C | -5.59617000 | -2.69990700 | 0.66477500  |
| C | -3.20368700 | -2.79546200 | 0.21429500  |
| C | -7.93486500 | -1.22579300 | 1.13733300  |
| H | -6.82616900 | 0.50066000  | 0.54016500  |
| C | -6.78057500 | -3.34304000 | 1.11671000  |
| C | -4.37789700 | -3.42243000 | 0.54249100  |
| C | -7.92943100 | -2.62622500 | 1.34187700  |
| H | -8.83792600 | -0.65165700 | 1.34897300  |
| H | -6.75089500 | -4.41935900 | 1.29793100  |
| H | -4.36776600 | -4.48662300 | 0.79016900  |
| H | -8.83103400 | -3.12813200 | 1.69533100  |
| O | -2.09115700 | -0.84262100 | -0.59225500 |
| O | -2.48898900 | 1.14242900  | 0.84196300  |
| P | -1.27533400 | 0.23471100  | 0.30015500  |
| O | -0.23631600 | 0.88368500  | -0.52726200 |
| H | 1.66590000  | 0.84697900  | -0.51109900 |
| O | -0.78947400 | -0.44604900 | 1.61973700  |
| C | -1.86083900 | -3.44816700 | 0.28953200  |
| C | -1.20416400 | -3.88844800 | -0.88691000 |
| C | -1.21087600 | -3.53296300 | 1.53840700  |
| C | 0.11789600  | -4.32456200 | -0.79619000 |
| C | 0.11761500  | -3.99330800 | 1.56451700  |
| C | 0.81212300  | -4.35866900 | 0.41620900  |
| H | 0.62476500  | -4.64148100 | -1.71186800 |
| H | 0.63140700  | -4.04801000 | 2.53084600  |
| C | -2.00493800 | 3.67603100  | -0.15481300 |
| C | -1.01649800 | 3.83149900  | -1.15375300 |
| C | -1.73951500 | 4.05872600  | 1.17490500  |
| C | 0.22267200  | 4.36121000  | -0.77343400 |
| C | -0.49701000 | 4.61366800  | 1.48852300  |
| C | 0.51244300  | 4.74886900  | 0.53484400  |
| H | 0.99808100  | 4.45342500  | -1.53792700 |
| H | -0.30238100 | 4.94042900  | 2.51464300  |
| C | -1.88323100 | -4.03902600 | -2.24840700 |
| C | -2.49807800 | -2.78450500 | -2.88122500 |
| C | -2.90086600 | -5.18665500 | -2.22401300 |
| H | -1.07317300 | -4.35760700 | -2.92380100 |
| H | -1.83999900 | -1.90971800 | -2.79326400 |
| H | -2.68102300 | -2.97674900 | -3.94945300 |
| H | -3.46644800 | -2.52554000 | -2.43052000 |
| H | -2.44705300 | -6.11022000 | -1.83747700 |
| H | -3.76265100 | -4.93319100 | -1.58997200 |
| H | -3.27803600 | -5.38327300 | -3.23903800 |
| C | -1.82116600 | -3.28292800 | 2.92500400  |
| C | -2.30830700 | -4.62565700 | 3.49170800  |
| C | -2.90310600 | -2.21741300 | 3.14403100  |
| H | -0.96356800 | -2.96730300 | 3.54075000  |
| H | -1.51674900 | -5.38777000 | 3.46737600  |
| H | -2.64720900 | -4.50499700 | 4.53162300  |
| H | -3.15744100 | -5.00194900 | 2.90037200  |
| H | -2.68873800 | -1.28001900 | 2.62069700  |
| H | -3.90197000 | -2.56490700 | 2.85308100  |
| H | -2.94207000 | -1.99315200 | 4.22070700  |

|   |             |             |             |
|---|-------------|-------------|-------------|
| C | 2.26277900  | -4.80403200 | 0.47730100  |
| C | 3.15963300  | -3.97167700 | -0.44573900 |
| C | 2.38549100  | -6.29765000 | 0.15828800  |
| H | 2.60835900  | -4.64371000 | 1.51200500  |
| H | 3.13208100  | -2.90590200 | -0.17731800 |
| H | 4.20292600  | -4.31453200 | -0.37941700 |
| H | 2.84270800  | -4.04834000 | -1.49885000 |
| H | 1.75921200  | -6.90025600 | 0.83127200  |
| H | 2.06460000  | -6.50090000 | -0.87509500 |
| H | 3.42839800  | -6.63274100 | 0.25992800  |
| C | -1.16247200 | 3.49847900  | -2.64277700 |
| C | -1.79076300 | 4.67155400  | -3.40780300 |
| C | -1.82180100 | 2.17245400  | -3.04431000 |
| H | -0.12241000 | 3.42375300  | -2.99619800 |
| H | -1.71800100 | 4.49941200  | -4.49229100 |
| H | -2.85649400 | 4.78072300  | -3.16077600 |
| H | -1.28585000 | 5.61936000  | -3.17214100 |
| H | -1.43095400 | 1.33756200  | -2.45063500 |
| H | -2.91642300 | 2.19130700  | -2.96022700 |
| H | -1.58482400 | 1.97434300  | -4.10072900 |
| C | -2.77438100 | 3.89396300  | 2.27702900  |
| C | -3.35882200 | 5.25358600  | 2.67455000  |
| C | -2.20876800 | 3.15202400  | 3.49076800  |
| H | -3.59987700 | 3.28601300  | 1.88090900  |
| H | -3.81311600 | 5.75618000  | 1.80842100  |
| H | -4.12968600 | 5.13500700  | 3.45071000  |
| H | -2.57304000 | 5.91409900  | 3.07305500  |
| H | -1.74438500 | 2.20179200  | 3.18956600  |
| H | -1.45351300 | 3.75763000  | 4.01607600  |
| H | -3.01018900 | 2.93293200  | 4.21184100  |
| C | 1.86745900  | 5.31948000  | 0.91324400  |
| C | 1.93697400  | 6.80829800  | 0.55317900  |
| C | 3.03588800  | 4.55025700  | 0.29368700  |
| H | 1.95130700  | 5.23570700  | 2.01043500  |
| H | 1.12686500  | 7.37473900  | 1.03452700  |
| H | 2.89938100  | 7.24077500  | 0.86508400  |
| H | 1.84013500  | 6.94035300  | -0.53565600 |
| H | 2.98649800  | 3.47037200  | 0.49138200  |
| H | 3.07207400  | 4.68343900  | -0.79819700 |
| H | 3.99309100  | 4.91511600  | 0.69302800  |
| O | 1.47037700  | -1.34112000 | 0.87759700  |
| H | 1.75719300  | -2.09834400 | 1.42081600  |
| H | 0.12314000  | -0.86650300 | 1.43781300  |

**TS2***1Re-Sa-3R*

|   |             |             |             |
|---|-------------|-------------|-------------|
| S | -2.93152600 | 0.22843000  | 1.93524700  |
| O | -2.22521000 | 1.12897500  | 2.82491500  |
| O | -2.20128900 | -0.53352900 | 0.91506500  |
| O | -1.02230100 | 2.83112500  | 0.70398400  |
| N | -3.97138900 | 1.57047600  | -0.27102500 |
| N | -2.71448800 | 1.57812700  | -0.87440000 |
| C | -3.86869900 | -0.89519100 | 2.94685800  |
| C | -3.62268600 | -0.88245400 | 4.31595600  |
| H | -2.93653000 | -0.14302700 | 4.73057500  |
| C | -4.25705200 | -1.83527300 | 5.11315000  |
| H | -4.07375700 | -1.85008400 | 6.18796900  |
| C | -5.11885200 | -2.76734500 | 4.53612900  |
| H | -5.61053200 | -3.51149000 | 5.16438400  |
| C | -5.36028500 | -2.75520600 | 3.15952200  |
| H | -6.03688200 | -3.48563600 | 2.71335500  |
| C | -4.72729100 | -1.81594500 | 2.35134500  |
| H | -4.88969400 | -1.79525700 | 1.27334300  |
| C | -4.18683000 | 1.09394400  | 1.01432100  |
| C | -5.46164300 | 1.37608900  | 1.41990200  |
| H | -5.90396600 | 1.08802100  | 2.36977100  |
| C | -6.07798100 | 2.08966100  | 0.34731100  |
| C | -5.11435700 | 2.22976600  | -0.68794900 |

|   |             |             |             |
|---|-------------|-------------|-------------|
| C | -5.41732800 | 2.96177800  | -1.85387500 |
| H | -4.69203400 | 3.14311300  | -2.64293400 |
| C | -6.68854400 | 3.49456100  | -1.97029800 |
| H | -6.93675300 | 4.06516300  | -2.86606900 |
| C | -7.66487200 | 3.32787700  | -0.96471700 |
| H | -8.65548600 | 3.76189400  | -1.10219400 |
| C | -7.36631800 | 2.63620000  | 0.19148800  |
| H | -8.10620400 | 2.51751800  | 0.98420500  |
| C | -2.59651600 | 1.29734500  | -2.33643900 |
| H | -3.46501600 | 1.72397100  | -2.84909100 |
| C | -1.29907800 | 2.00320300  | -2.68802500 |
| C | -0.59240700 | 1.71935300  | -3.85155800 |
| H | -1.03223200 | 1.06431000  | -4.60600800 |
| C | 0.70283600  | 2.21457300  | -4.00360900 |
| H | 1.26707500  | 1.98656700  | -4.90909800 |
| C | 1.29911000  | 2.95173800  | -2.97937100 |
| H | 2.32956900  | 3.29907900  | -3.07633300 |
| C | 0.59171400  | 3.22972300  | -1.81013000 |
| H | 1.06008800  | 3.76546000  | -0.98415400 |
| C | -0.71983200 | 2.78205200  | -1.68643800 |
| C | -1.51006300 | 3.07072400  | -0.43594400 |
| C | -2.48392900 | 4.22189700  | -0.50578000 |
| H | -3.21049200 | 4.14460200  | 0.31509700  |
| H | -2.99514100 | 4.27769100  | -1.47381400 |
| H | -1.90044000 | 5.14340500  | -0.36701600 |
| C | 1.61608200  | -2.46827300 | -0.13380900 |
| C | 2.99426700  | -2.39893800 | -0.20080700 |
| C | 3.69817900  | -3.39730100 | -0.96005700 |
| C | 2.97338000  | -4.51055400 | -1.47300400 |
| C | 1.55991700  | -4.54002500 | -1.34156100 |
| C | 0.86760500  | -3.50386300 | -0.76559900 |
| H | 5.65215000  | -2.44481500 | -0.89947300 |
| C | 5.09102200  | -3.31440700 | -1.24095100 |
| C | 3.66522300  | -5.53167000 | -2.18016100 |
| H | 1.00484700  | -5.37345100 | -1.77722300 |
| C | 5.01595900  | -5.43932800 | -2.40599400 |
| C | 5.73007900  | -4.30752700 | -1.94396600 |
| H | 3.09349000  | -6.38266500 | -2.55624300 |
| H | 5.53719400  | -6.22392200 | -2.95617200 |
| H | 6.79694200  | -4.21873500 | -2.15361400 |
| C | 3.70320000  | -1.28072100 | 0.47087200  |
| C | 4.79917900  | -1.51726900 | 1.37088200  |
| C | 3.29380400  | 0.02197000  | 0.24264300  |
| C | 5.16910300  | -2.82028300 | 1.80875100  |
| C | 5.53384600  | -0.40698600 | 1.87271800  |
| C | 3.98395500  | 1.14065800  | 0.79597100  |
| C | 6.23350200  | -3.00420300 | 2.65828600  |
| H | 4.58999900  | -3.67954000 | 1.47150900  |
| C | 6.63977700  | -0.62837100 | 2.73814900  |
| C | 5.10801800  | 0.90698600  | 1.54757200  |
| C | 6.98984800  | -1.89953900 | 3.11924000  |
| H | 6.49308900  | -4.01163000 | 2.98663900  |
| H | 7.19543200  | 0.23722800  | 3.10465700  |
| H | 5.65018800  | 1.75750800  | 1.96876700  |
| H | 7.83614800  | -2.06082900 | 3.78832100  |
| O | 2.22102000  | 0.26093600  | -0.58785600 |
| O | 0.92879800  | -1.51622400 | 0.59484500  |
| P | 0.69159000  | -0.06046800 | -0.09340500 |
| O | 0.36656100  | 0.89554800  | 1.05773300  |
| C | 3.48140600  | 2.53537400  | 0.61608300  |
| C | 3.88414800  | 3.29761700  | -0.50476000 |
| C | 2.66123900  | 3.11210100  | 1.61312100  |
| C | 3.45171900  | 4.62488800  | -0.61465600 |
| C | 2.21192800  | 4.42392600  | 1.40947100  |
| C | 2.59880400  | 5.20506300  | 0.32352900  |
| H | 3.79443800  | 5.20795500  | -1.47226900 |



|   |             |             |             |
|---|-------------|-------------|-------------|
| H | 1.54568200  | 4.86224000  | 2.15921700  |
| C | -0.61796600 | -3.42393600 | -0.84853300 |
| C | -1.23466600 | -3.08942900 | -2.07667600 |
| C | -1.39457400 | -3.68236900 | 0.29569900  |
| C | -2.63069200 | -3.01676800 | -2.10393000 |
| C | -2.78770800 | -3.62765400 | 0.20017700  |
| C | -3.42440700 | -3.27595900 | -0.98692600 |
| H | -3.11169600 | -2.72079000 | -3.04076700 |
| H | -3.38954500 | -3.84915500 | 1.08591600  |
| C | 4.86893600  | 2.82908800  | -1.57845100 |
| C | 4.65627500  | 1.43671400  | -2.18475600 |
| C | 6.31649500  | 2.99327600  | -1.09664900 |
| H | 4.73458400  | 3.54698300  | -2.40470500 |
| H | 3.59296300  | 1.21303300  | -2.34682600 |
| H | 5.17606500  | 1.38561900  | -3.15337000 |
| H | 5.07815300  | 0.64419700  | -1.55141300 |
| H | 6.50220800  | 4.01411300  | -0.73326000 |
| H | 6.53405200  | 2.29057300  | -0.27923600 |
| H | 7.01874800  | 2.78234000  | -1.91743900 |
| C | 2.26178600  | 2.53093700  | 2.98141100  |
| C | 2.97980800  | 3.33988100  | 4.07688900  |
| C | 2.43168000  | 1.04598700  | 3.31879300  |
| H | 1.18174400  | 2.74027600  | 3.05761600  |
| H | 2.79753000  | 4.41964100  | 3.99393400  |
| H | 2.64889300  | 3.00924000  | 5.07246800  |
| H | 4.06741100  | 3.17705200  | 4.01104500  |
| H | 2.02474000  | 0.37605600  | 2.55777800  |
| H | 3.47977400  | 0.78023900  | 3.50995000  |
| H | 1.87277800  | 0.85531300  | 4.24731700  |
| C | 2.04956700  | 6.61701600  | 0.19358900  |
| C | 0.54905200  | 6.57480100  | -0.12184700 |
| C | 2.78903800  | 7.47720200  | -0.82651800 |
| H | 2.16610400  | 7.09042700  | 1.18331100  |
| H | 0.01055200  | 5.95602900  | 0.61139400  |
| H | 0.11520800  | 7.58608000  | -0.11090000 |
| H | 0.38287800  | 6.14126900  | -1.12120500 |
| H | 3.86959700  | 7.50555200  | -0.62622900 |
| H | 2.64029900  | 7.09466600  | -1.84811300 |
| H | 2.40818800  | 8.50812500  | -0.80224300 |
| C | -0.55014700 | -2.84307300 | -3.42922500 |
| C | -0.50880400 | -4.14366100 | -4.24489700 |
| C | 0.81273700  | -2.14128000 | -3.48347100 |
| H | -1.24954300 | -2.17019000 | -3.95343500 |
| H | -0.17446000 | -3.93922700 | -5.27330300 |
| H | 0.19936400  | -4.85861400 | -3.80059500 |
| H | -1.49686100 | -4.62382200 | -4.28800400 |
| H | 0.84162300  | -1.25419600 | -2.83992200 |
| H | 1.64542100  | -2.80441100 | -3.21494400 |
| H | 0.98661200  | -1.81337000 | -4.52043800 |
| C | -0.76013900 | -4.06320200 | 1.62468300  |
| C | -1.01152900 | -5.54243000 | 1.93506500  |
| C | -1.23340500 | -3.16322700 | 2.76856400  |
| H | 0.32634200  | -3.92660000 | 1.53587300  |
| H | -0.62482300 | -6.18600700 | 1.13134900  |
| H | -0.52178600 | -5.83182000 | 2.87704800  |
| H | -2.08987000 | -5.74187100 | 2.03722300  |
| H | -1.05663200 | -2.10711000 | 2.52167500  |
| H | -2.30895700 | -3.30126900 | 2.97002600  |
| H | -0.68976300 | -3.40617200 | 3.69411300  |
| C | -4.93087300 | -3.11705600 | -1.06867600 |
| C | -5.55874600 | -4.05406000 | -2.10336300 |
| C | -5.29654500 | -1.65508400 | -1.35794000 |
| H | -5.34044800 | -3.39557200 | -0.08173900 |
| H | -5.31679700 | -5.10383700 | -1.88587200 |
| H | -6.65346000 | -3.94335200 | -2.11709000 |
| H | -5.18615700 | -3.82319900 | -3.11263800 |

|   |             |             |             |
|---|-------------|-------------|-------------|
| H | -4.78395200 | -0.97052800 | -0.66430900 |
| H | -4.96357700 | -1.36793300 | -2.36630100 |
| H | -6.38292700 | -1.49144000 | -1.28656100 |
| O | -2.59140500 | -0.04802800 | -2.62126800 |
| H | -1.77543600 | -0.42910200 | -2.22975200 |
| H | -0.25775600 | 1.82883700  | 0.86964800  |
| O | -0.22249700 | -0.10452000 | -1.26244500 |
| H | -2.16303100 | 0.82225600  | -0.42880000 |

**TS3<sub>1Re-Ra-3R</sub>**

|   |             |             |             |
|---|-------------|-------------|-------------|
| S | 5.69369800  | -1.36797600 | -1.46209900 |
| O | 5.34735100  | -0.33015200 | -2.44079500 |
| O | 5.45286000  | -2.76817400 | -1.79448600 |
| O | 1.08957900  | -2.34985900 | 1.28240900  |
| N | 3.54587400  | -0.55578200 | 0.19602100  |
| N | 2.43019700  | -0.99319100 | -0.51977900 |
| C | 7.41029100  | -1.18838000 | -1.06152100 |
| C | 7.99701300  | 0.07042900  | -1.17437500 |
| H | 7.39986700  | 0.92088700  | -1.50673700 |
| C | 9.34775700  | 0.19784900  | -0.86238700 |
| H | 9.83355300  | 1.17062000  | -0.94381200 |
| C | 10.07886000 | -0.91973500 | -0.45256500 |
| H | 11.13701100 | -0.81256300 | -0.20983300 |
| C | 9.47277100  | -2.17314300 | -0.35912200 |
| H | 10.05463700 | -3.04185800 | -0.04975200 |
| C | 8.12180700  | -2.31920100 | -0.66998800 |
| H | 7.61953400  | -3.28637700 | -0.62362300 |
| C | 4.88110000  | -0.93886200 | 0.06089200  |
| C | 5.55429200  | -0.70273800 | 1.23288700  |
| H | 6.62303000  | -0.82304900 | 1.38442700  |
| C | 4.60527800  | -0.19457400 | 2.17280200  |
| C | 3.36718700  | -0.10913000 | 1.50284900  |
| C | 2.20861500  | 0.36983200  | 2.13007700  |
| H | 1.25682500  | 0.45657000  | 1.60786000  |
| C | 2.32918600  | 0.74885800  | 3.45337500  |
| H | 1.44692400  | 1.13602600  | 3.96451700  |
| C | 3.55773300  | 0.66063300  | 4.14867800  |
| H | 3.60012600  | 0.96843900  | 5.19425500  |
| C | 4.69959600  | 0.20461700  | 3.52114000  |
| H | 5.65225400  | 0.14736200  | 4.04908400  |
| C | 2.53777500  | -1.24854200 | -1.99315000 |
| H | 3.39556500  | -1.91974700 | -2.14847000 |
| C | 1.26547800  | -2.01724900 | -2.23818000 |
| C | 0.57270100  | -2.02583900 | -3.43741800 |
| H | 0.95828000  | -1.46709500 | -4.29066800 |
| C | -0.63464500 | -2.72487300 | -3.50104900 |
| H | -1.20035200 | -2.74687400 | -4.43365800 |
| C | -1.14525800 | -3.35934300 | -2.36932600 |
| H | -2.10228300 | -3.87679900 | -2.42223200 |
| C | -0.46015100 | -3.31721700 | -1.15214400 |
| H | -0.89128100 | -3.75835500 | -0.25139800 |
| C | 0.76658200  | -2.66752100 | -1.11002600 |
| C | 1.62804400  | -2.55865400 | 0.11771500  |
| C | 2.80911500  | -3.49410400 | 0.20855500  |
| H | 3.44729700  | -3.18665800 | 1.04964800  |
| H | 3.39779200  | -3.54989200 | -0.71530900 |
| H | 2.40442700  | -4.49229300 | 0.43086900  |
| C | -2.02843100 | 2.33905500  | -0.17851400 |
| C | -3.27746200 | 2.20420600  | -0.75356600 |
| C | -3.65011100 | 3.11711000  | -1.79824200 |
| C | -2.79527600 | 4.21899100  | -2.08685000 |
| C | -1.55412100 | 4.34047300  | -1.40547400 |
| C | -1.12388000 | 3.38823000  | -0.51581300 |
| H | -5.47452400 | 2.09535500  | -2.38678800 |
| C | -4.83242900 | 2.95682600  | -2.57253700 |
| C | -3.17296200 | 5.14927500  | -3.09318200 |
| H | -0.90107900 | 5.18267000  | -1.64441300 |

|   |             |             |             |
|---|-------------|-------------|-------------|
| C | -4.33294600 | 4.98116400  | -3.80831900 |
| C | -5.16306300 | 3.86347100  | -3.55131600 |
| H | -2.51062400 | 5.99336700  | -3.29650800 |
| H | -4.60953900 | 5.69672500  | -4.58385500 |
| H | -6.07012400 | 3.71688700  | -4.13940400 |
| C | -4.18027400 | 1.12941800  | -0.26325700 |
| C | -5.51309400 | 1.42084300  | 0.19382300  |
| C | -3.71278300 | -0.16983100 | -0.16518000 |
| C | -6.02472300 | 2.74658800  | 0.28909200  |
| C | -6.35532000 | 0.34888400  | 0.60639600  |
| C | -4.52250300 | -1.23492700 | 0.32963200  |
| C | -7.31011900 | 2.98084800  | 0.71505300  |
| H | -5.38148600 | 3.58667200  | 0.03037400  |
| C | -7.68517600 | 0.62068600  | 1.02945700  |
| C | -5.82814300 | -0.96806800 | 0.65553600  |
| C | -8.15995800 | 1.90736600  | 1.07512400  |
| H | -7.67564000 | 4.00640900  | 0.78410800  |
| H | -8.31596700 | -0.21791300 | 1.33153100  |
| H | -6.46122200 | -1.77662200 | 1.02925100  |
| H | -9.18017800 | 2.10728900  | 1.40538500  |
| O | -2.43974700 | -0.47196300 | -0.59382000 |
| O | -1.64004400 | 1.44120900  | 0.79142700  |
| P | -1.11429300 | -0.01535600 | 0.25388600  |
| O | -0.90849100 | -0.90322300 | 1.45746300  |
| C | -3.93010400 | -2.58606300 | 0.55480500  |
| C | -3.96447400 | -3.56595700 | -0.45990400 |
| C | -3.35418700 | -2.88015600 | 1.81107900  |
| C | -3.38820900 | -4.81874000 | -0.21338700 |
| C | -2.74782600 | -4.13128900 | 1.97738100  |
| C | -2.74827500 | -5.11443400 | 0.98985900  |
| H | -3.43849400 | -5.57402100 | -1.00184700 |
| H | -2.27868300 | -4.35515500 | 2.94120300  |
| C | 0.23388300  | 3.43303900  | 0.10067500  |
| C | 1.39551300  | 3.20771600  | -0.67259400 |
| C | 0.34953300  | 3.70771900  | 1.48005800  |
| C | 2.63454700  | 3.25670000  | -0.01976400 |
| C | 1.61650700  | 3.80517400  | 2.06083300  |
| C | 2.78109100  | 3.57605400  | 1.33074100  |
| H | 3.52763800  | 3.04347100  | -0.61543000 |
| H | 1.68108800  | 4.04886400  | 3.12230000  |
| C | -4.68088600 | -3.40038500 | -1.80106500 |
| C | -4.45195500 | -2.08936200 | -2.56615200 |
| C | -6.18126800 | -3.68620000 | -1.65520400 |
| H | -4.27663100 | -4.20747500 | -2.43501300 |
| H | -3.41718200 | -1.73062800 | -2.47422400 |
| H | -4.67168300 | -2.25149900 | -3.63241700 |
| H | -5.12072100 | -1.29127000 | -2.21580300 |
| H | -6.35694600 | -4.65937100 | -1.17498400 |
| H | -6.66497900 | -2.90833000 | -1.04711500 |
| H | -6.66714800 | -3.69144300 | -2.64276200 |
| C | -3.45530800 | -2.05383400 | 3.10079800  |
| C | -4.60271000 | -2.63900300 | 3.94174900  |
| C | -3.59194000 | -0.52843900 | 3.07988200  |
| H | -2.51220900 | -2.26364800 | 3.62972000  |
| H | -4.48933300 | -3.72137800 | 4.09478500  |
| H | -4.64797100 | -2.14854300 | 4.92565600  |
| H | -5.56581400 | -2.46899300 | 3.43494000  |
| H | -2.84550400 | -0.04416900 | 2.44527500  |
| H | -4.59287400 | -0.19480700 | 2.77681300  |
| H | -3.42880300 | -0.16647400 | 4.10679900  |
| C | -2.02927900 | -6.42871800 | 1.24628500  |
| C | -0.51865000 | -6.26633600 | 1.02797200  |
| C | -2.56833300 | -7.59556400 | 0.42225600  |
| H | -2.18540800 | -6.66621800 | 2.31185000  |
| H | -0.12008900 | -5.42166600 | 1.61039100  |
| H | 0.01945200  | -7.17933500 | 1.32463900  |

|   |             |             |             |
|---|-------------|-------------|-------------|
| H | -0.30624100 | -6.07618800 | -0.03609500 |
| H | -3.65706300 | -7.69945300 | 0.53368000  |
| H | -2.34507800 | -7.46371500 | -0.64744800 |
| H | -2.09692000 | -8.53666300 | 0.73994700  |
| C | 1.49137800  | 2.98604800  | -2.18739700 |
| C | 1.87959300  | 4.30442900  | -2.87421600 |
| C | 0.34941800  | 2.30969900  | -2.95255000 |
| H | 2.34941900  | 2.30529700  | -2.29216500 |
| H | 2.07657200  | 4.13301400  | -3.94333800 |
| H | 1.06238600  | 5.03808000  | -2.79850000 |
| H | 2.77570700  | 4.75292600  | -2.42128700 |
| H | -0.07458600 | 1.47030400  | -2.39042200 |
| H | -0.45302800 | 3.00974900  | -3.21948400 |
| H | 0.76388600  | 1.91027600  | -3.89064000 |
| C | -0.86107400 | 3.94475200  | 2.37262300  |
| C | -0.89872900 | 5.39267600  | 2.87251100  |
| C | -0.90106000 | 2.94987000  | 3.53684800  |
| H | -1.77062600 | 3.78576800  | 1.77970100  |
| H | -0.91169700 | 6.09939200  | 2.03016700  |
| H | -1.79608200 | 5.56732800  | 3.48479300  |
| H | -0.01765500 | 5.62182700  | 3.49166400  |
| H | -0.85882000 | 1.91591700  | 3.16435800  |
| H | -0.06052600 | 3.11609400  | 4.22992500  |
| H | -1.83170100 | 3.06812100  | 4.11188300  |
| C | 4.16876800  | 3.62959200  | 1.95585000  |
| C | 4.16427000  | 4.06799600  | 3.41804500  |
| C | 5.11057900  | 4.53410700  | 1.15184700  |
| H | 4.56798000  | 2.59887100  | 1.91708800  |
| H | 3.54670600  | 3.40924100  | 4.04263800  |
| H | 5.18724600  | 4.04921800  | 3.82133400  |
| H | 3.78048700  | 5.09582500  | 3.51641400  |
| H | 5.19961800  | 4.21645300  | 0.10443600  |
| H | 4.73746100  | 5.56988300  | 1.15731200  |
| H | 6.11858400  | 4.53111600  | 1.59285200  |
| O | 2.63495000  | -0.11367700 | -2.74984400 |
| H | 3.58127800  | 0.08041100  | -2.86709300 |
| H | 0.20143500  | -1.78114500 | 1.31845100  |
| O | 0.05006800  | 0.16702400  | -0.67030100 |
| H | 1.62626700  | -0.30261700 | -0.43130100 |

**TS4***ISI-Sa-3R*

|   |             |             |             |
|---|-------------|-------------|-------------|
| S | 5.64001600  | -0.36198200 | -0.25886600 |
| O | 5.07489400  | 0.15235000  | -1.50200400 |
| O | 5.91526700  | -1.77575600 | -0.05779300 |
| O | 1.05249200  | 2.61242500  | -0.57433200 |
| N | 3.28029600  | 0.51022100  | 1.16747800  |
| N | 2.30689200  | 0.48780200  | 0.17818900  |
| C | 7.19545200  | 0.47982700  | 0.00897900  |
| C | 7.37490100  | 1.76619900  | -0.49437900 |
| H | 6.56981400  | 2.25529400  | -1.04433100 |
| C | 8.60085900  | 2.39668300  | -0.29634400 |
| H | 8.76142400  | 3.40357900  | -0.68318200 |
| C | 9.62491500  | 1.73646600  | 0.38551300  |
| H | 10.58367500 | 2.23471700  | 0.53614700  |
| C | 9.43493600  | 0.43971500  | 0.86337500  |
| H | 10.24390600 | -0.07766800 | 1.38046300  |
| C | 8.21282400  | -0.20294200 | 0.67082800  |
| H | 8.03717800  | -1.22366600 | 1.01303900  |
| C | 4.65782200  | 0.28560700  | 1.10196600  |
| C | 5.22457200  | 0.61862500  | 2.30445200  |
| H | 6.27983300  | 0.53089700  | 2.54689900  |
| C | 4.18611200  | 1.11003000  | 3.15449800  |
| C | 2.98650900  | 1.05073900  | 2.41373100  |
| C | 1.76509800  | 1.51899200  | 2.92545500  |
| H | 0.84062600  | 1.48131600  | 2.34992200  |
| C | 1.78307400  | 2.01904800  | 4.21643100  |
| H | 0.85120600  | 2.38683400  | 4.64772700  |

|   |             |             |             |
|---|-------------|-------------|-------------|
| C | 2.96699000  | 2.06617900  | 4.98530900  |
| H | 2.92911400  | 2.46743000  | 5.99861800  |
| C | 4.16736700  | 1.61961100  | 4.46701000  |
| H | 5.08641500  | 1.66334600  | 5.05287800  |
| C | 2.24209600  | -0.73039900 | -0.72732200 |
| H | 1.26272800  | -1.19558700 | -0.51418600 |
| C | 2.25788200  | -0.16057600 | -2.12121300 |
| C | 2.31721600  | -0.93930400 | -3.27085900 |
| H | 2.40992200  | -2.02271800 | -3.18271000 |
| C | 2.25629800  | -0.31478100 | -4.51464000 |
| H | 2.30121200  | -0.91446900 | -5.42474100 |
| C | 2.13041300  | 1.07356100  | -4.60314800 |
| H | 2.07124700  | 1.55316000  | -5.58097400 |
| C | 2.08292800  | 1.85036500  | -3.44723100 |
| H | 1.98805200  | 2.93645200  | -3.50908300 |
| C | 2.15997900  | 1.22193800  | -2.20552800 |
| C | 2.16128000  | 1.99800100  | -0.91662500 |
| C | 3.39494200  | 2.79428700  | -0.59854200 |
| H | 3.39924300  | 3.08376300  | 0.46244000  |
| H | 3.35199600  | 3.71072000  | -1.20580200 |
| H | 4.29326000  | 2.22716500  | -0.85985700 |
| C | -2.54654400 | -1.97500800 | 0.17102400  |
| C | -3.83108800 | -1.63864600 | 0.56493500  |
| C | -4.52919800 | -2.54332900 | 1.43980900  |
| C | -3.97046300 | -3.82758000 | 1.69837300  |
| C | -2.68898100 | -4.14833600 | 1.17808200  |
| C | -1.93816700 | -3.22376900 | 0.49572900  |
| H | -6.17380300 | -1.20854600 | 1.92766800  |
| C | -5.75573100 | -2.20398800 | 2.07643100  |
| C | -4.67783200 | -4.74822200 | 2.51894700  |
| H | -2.27057700 | -5.13719900 | 1.37432300  |
| C | -5.87382000 | -4.40078100 | 3.09592600  |
| C | -6.40696500 | -3.10671000 | 2.88265800  |
| H | -4.23866300 | -5.73250400 | 2.69497300  |
| H | -6.40526400 | -5.11028400 | 3.73152100  |
| H | -7.34089700 | -2.82006600 | 3.36804900  |
| C | -4.45543400 | -0.37239000 | 0.09156600  |
| C | -5.76664900 | -0.33956900 | -0.50419300 |
| C | -3.76233400 | 0.81779600  | 0.19160500  |
| C | -6.49559600 | -1.51698100 | -0.83135100 |
| C | -6.35914400 | 0.92169900  | -0.80565600 |
| C | -4.30257600 | 2.07761500  | -0.20501500 |
| C | -7.75566200 | -1.44242900 | -1.37585900 |
| H | -6.04003000 | -2.49106400 | -0.65580900 |
| C | -7.67042500 | 0.96645200  | -1.35215500 |
| C | -5.60469000 | 2.11482200  | -0.63009600 |
| C | -8.36110200 | -0.18809900 | -1.62528100 |
| H | -8.29011400 | -2.36030700 | -1.62481500 |
| H | -8.11028600 | 1.94261300  | -1.56658700 |
| H | -6.05479200 | 3.07001300  | -0.91003500 |
| H | -9.36442500 | -0.14238800 | -2.05080800 |
| O | -2.51051900 | 0.82717000  | 0.75340000  |
| O | -1.82825100 | -1.12733500 | -0.63605400 |
| P | -1.20709200 | 0.26284800  | -0.03783100 |
| O | -0.81205400 | 1.08947400  | -1.23222500 |
| C | -3.36157200 | 3.23650200  | -0.22997000 |
| C | -3.04320600 | 3.94458100  | 0.95272100  |
| C | -2.67325500 | 3.50554800  | -1.43160900 |
| C | -1.99168700 | 4.86183700  | 0.92132400  |
| C | -1.62479600 | 4.43629200  | -1.39647400 |
| C | -1.24561700 | 5.09955800  | -0.23537300 |
| H | -1.74436200 | 5.39953200  | 1.84081700  |
| H | -1.06800000 | 4.62872600  | -2.31859500 |
| C | -0.53187100 | -3.53095300 | 0.09607000  |
| C | 0.46918900  | -3.71173000 | 1.07680100  |
| C | -0.21700000 | -3.70625000 | -1.27236500 |

|   |             |             |             |
|---|-------------|-------------|-------------|
| C | 1.74161100  | -4.13133300 | 0.65180200  |
| C | 1.07078900  | -4.10981500 | -1.63712000 |
| C | 2.06559600  | -4.35470700 | -0.68804800 |
| H | 2.50935700  | -4.30669400 | 1.41432800  |
| H | 1.28992900  | -4.26797200 | -2.69657400 |
| C | -3.82847900 | 3.83759800  | 2.25921100  |
| C | -3.85908200 | 2.46228700  | 2.93606200  |
| C | -5.24563800 | 4.40253900  | 2.10570400  |
| H | -3.29862000 | 4.50631400  | 2.95616600  |
| H | -2.86370300 | 2.00082000  | 2.96582200  |
| H | -4.22434200 | 2.57834000  | 3.96772000  |
| H | -4.54083600 | 1.76601500  | 2.42777500  |
| H | -5.22531000 | 5.41182300  | 1.67024800  |
| H | -5.85719200 | 3.75890200  | 1.45756800  |
| H | -5.74235000 | 4.45798200  | 3.08631700  |
| C | -3.01467300 | 2.95985600  | -2.82392000 |
| C | -4.08639600 | 3.85770800  | -3.45989900 |
| C | -3.38340000 | 1.48392900  | -3.02333400 |
| H | -2.08830700 | 3.10766400  | -3.40094000 |
| H | -3.79812200 | 4.91800700  | -3.42242600 |
| H | -4.25091300 | 3.57600200  | -4.51102500 |
| H | -5.04405200 | 3.74814700  | -2.92866900 |
| H | -2.68579000 | 0.81566800  | -2.50737200 |
| H | -4.40912900 | 1.25079600  | -2.71051200 |
| H | -3.31942600 | 1.26351900  | -4.10022200 |
| C | -0.07825600 | 6.06775100  | -0.23456100 |
| C | 0.93017300  | 5.74504900  | 0.87098400  |
| C | -0.56600000 | 7.51658500  | -0.13470100 |
| H | 0.43431800  | 5.94629400  | -1.20333800 |
| H | 1.24661000  | 4.69533700  | 0.80631500  |
| H | 1.81545600  | 6.39398900  | 0.78829700  |
| H | 0.49210100  | 5.91146800  | 1.86707700  |
| H | -1.26027000 | 7.75899800  | -0.95167800 |
| H | -1.09619900 | 7.67906300  | 0.81657200  |
| H | 0.27977600  | 8.21958600  | -0.17544600 |
| C | 0.32088900  | -3.53639600 | 2.59309800  |
| C | 0.05576400  | -4.87931000 | 3.28840700  |
| C | -0.63228400 | -2.45438900 | 3.11139600  |
| H | 1.32820900  | -3.22312400 | 2.91340800  |
| H | 0.14462900  | -4.76057900 | 4.37849400  |
| H | -0.96154500 | -5.23868800 | 3.07768400  |
| H | 0.76756000  | -5.65274500 | 2.96541100  |
| H | -0.55762100 | -1.53213100 | 2.52112700  |
| H | -1.67952100 | -2.78389400 | 3.12018700  |
| H | -0.35756900 | -2.21874600 | 4.15078200  |
| C | -1.25165000 | -3.52672700 | -2.37420500 |
| C | -1.53878000 | -4.86033500 | -3.07263300 |
| C | -0.82638600 | -2.44863700 | -3.37451700 |
| H | -2.19166600 | -3.19411400 | -1.91765200 |
| H | -1.87663400 | -5.61950200 | -2.35228500 |
| H | -2.32298400 | -4.73287900 | -3.83337500 |
| H | -0.64061600 | -5.24855900 | -3.57718300 |
| H | -0.60313200 | -1.49966900 | -2.86516000 |
| H | 0.06596700  | -2.75898300 | -3.94117800 |
| H | -1.63238600 | -2.26429900 | -4.10037600 |
| C | 3.43325900  | -4.89797900 | -1.06810200 |
| C | 4.06612900  | -4.20506300 | -2.27600400 |
| C | 3.33298200  | -6.41217500 | -1.29250500 |
| H | 4.09851800  | -4.72660700 | -0.20510100 |
| H | 4.21107600  | -3.13268400 | -2.08941300 |
| H | 5.05016500  | -4.64881000 | -2.48522200 |
| H | 3.45160000  | -4.33642900 | -3.18106400 |
| H | 2.91434800  | -6.91936800 | -0.41171400 |
| H | 2.67643200  | -6.62860000 | -2.14965300 |
| H | 4.32387200  | -6.84035300 | -1.50398000 |
| O | 3.25892100  | -1.60893900 | -0.47677900 |

|                                |             |             |             |
|--------------------------------|-------------|-------------|-------------|
| H                              | 2.94051300  | -2.32673500 | 0.09053600  |
| H                              | 0.22349900  | 2.09332900  | -0.91418500 |
| O                              | -0.15152600 | 0.00869300  | 1.00535100  |
| H                              | 1.35617800  | 0.46977200  | 0.66048100  |
| <b>TS5<sub>1Si-Ra-3R</sub></b> |             |             |             |
| S                              | -2.94293100 | -0.31099700 | 1.82110400  |
| O                              | -2.30952300 | 0.97702200  | 1.44452200  |
| O                              | -2.16601800 | -1.52964800 | 1.66524000  |
| O                              | -2.05622600 | -2.65864900 | -1.01674700 |
| N                              | -4.47531200 | -0.33319000 | -0.39143500 |
| N                              | -3.32187800 | -0.38894200 | -1.09637200 |
| C                              | -3.44647100 | -0.17231100 | 3.51880900  |
| C                              | -3.78357500 | 1.08072300  | 4.02718300  |
| H                              | -3.72467300 | 1.96187700  | 3.38599300  |
| C                              | -4.18484600 | 1.16846200  | 5.35776000  |
| H                              | -4.45221300 | 2.13709700  | 5.78127200  |
| C                              | -4.23724300 | 0.01838200  | 6.14854500  |
| H                              | -4.55047500 | 0.09415200  | 7.19084200  |
| C                              | -3.88593500 | -1.22486400 | 5.62154300  |
| H                              | -3.92036500 | -2.11571700 | 6.24945900  |
| C                              | -3.48220400 | -1.32982100 | 4.29135400  |
| H                              | -3.18653300 | -2.28327400 | 3.85050900  |
| C                              | -4.48729100 | -0.37866400 | 0.98355900  |
| C                              | -5.76330500 | -0.40286600 | 1.48241100  |
| H                              | -6.05213800 | -0.42431700 | 2.52950000  |
| C                              | -6.61954100 | -0.37935800 | 0.33262800  |
| C                              | -5.78942700 | -0.33415100 | -0.81735800 |
| C                              | -6.32839200 | -0.31209500 | -2.11314700 |
| H                              | -5.68140900 | -0.28019300 | -2.98786400 |
| C                              | -7.70458600 | -0.33080200 | -2.23557200 |
| H                              | -8.15137400 | -0.31294000 | -3.23066800 |
| C                              | -8.54848000 | -0.36810200 | -1.10072800 |
| H                              | -9.62986300 | -0.37765500 | -1.24124600 |
| C                              | -8.02047100 | -0.39211700 | 0.17511000  |
| H                              | -8.67105000 | -0.42140300 | 1.05053400  |
| C                              | -2.83238400 | 0.76292800  | -1.80445400 |
| H                              | -2.30164300 | 1.44789800  | -1.11803000 |
| C                              | -1.90226900 | 0.16787900  | -2.83924200 |
| C                              | -1.11087500 | 0.92108100  | -3.70082700 |
| H                              | -1.07749000 | 2.00692200  | -3.58901000 |
| C                              | -0.34919300 | 0.27479800  | -4.67479700 |
| H                              | 0.28502600  | 0.85994100  | -5.34299600 |
| C                              | -0.38563900 | -1.11597900 | -4.79028800 |
| H                              | 0.21334100  | -1.61574300 | -5.55359900 |
| C                              | -1.17315500 | -1.87071400 | -3.92076600 |
| H                              | -1.19415300 | -2.96072000 | -3.99583200 |
| C                              | -1.93221200 | -1.22249400 | -2.94884800 |
| C                              | -2.74426900 | -1.96416800 | -1.92435200 |
| C                              | -3.94777200 | -2.73629700 | -2.38416000 |
| H                              | -3.60745900 | -3.70944800 | -2.77038400 |
| H                              | -4.49396900 | -2.20730800 | -3.17173900 |
| H                              | -4.61393800 | -2.92277500 | -1.52940800 |
| C                              | 2.63199700  | 1.79332300  | 0.16617700  |
| C                              | 3.83472000  | 1.24310100  | 0.56661000  |
| C                              | 4.70001700  | 2.04380900  | 1.39135800  |
| C                              | 4.36834200  | 3.41013400  | 1.62281600  |
| C                              | 3.15153900  | 3.93473300  | 1.10930000  |
| C                              | 2.25209700  | 3.13855600  | 0.44942500  |
| H                              | 6.11000500  | 0.46408800  | 1.88159200  |
| C                              | 5.86700700  | 1.51848500  | 2.01282800  |
| C                              | 5.23669400  | 4.21558800  | 2.40904900  |
| H                              | 2.90140400  | 4.98104400  | 1.30069600  |
| C                              | 6.37037500  | 3.68592800  | 2.97361100  |
| C                              | 6.67777100  | 2.31745000  | 2.78311200  |
| H                              | 4.97311600  | 5.26340100  | 2.56686200  |
| H                              | 7.02588100  | 4.31102500  | 3.58144000  |

|   |             |             |             |
|---|-------------|-------------|-------------|
| H | 7.56262000  | 1.89054100  | 3.25718300  |
| C | 4.18809200  | -0.14264400 | 0.15547000  |
| C | 5.43951700  | -0.45352400 | -0.48427700 |
| C | 3.28304300  | -1.16954800 | 0.33632800  |
| C | 6.36886500  | 0.54636900  | -0.88634500 |
| C | 5.75959100  | -1.81603400 | -0.75310700 |
| C | 3.54433200  | -2.52327800 | -0.02573100 |
| C | 7.56491400  | 0.20605300  | -1.47184200 |
| H | 6.12032100  | 1.59628900  | -0.73426200 |
| C | 7.01213300  | -2.13752200 | -1.34380500 |
| C | 4.79521900  | -2.82865800 | -0.49669400 |
| C | 7.90166300  | -1.15122700 | -1.69008000 |
| H | 8.25797300  | 0.99110800  | -1.77740300 |
| H | 7.24343900  | -3.18801400 | -1.53174600 |
| H | 5.03877200  | -3.86429900 | -0.74233900 |
| H | 8.85731800  | -1.40795800 | -2.14897900 |
| O | 2.07170400  | -0.91638200 | 0.94070300  |
| O | 1.74263500  | 1.02941000  | -0.57050900 |
| P | 0.88398400  | -0.09668400 | 0.22481300  |
| O | -0.01544800 | -0.83359200 | -0.68296000 |
| C | 2.39557300  | -3.47684400 | 0.01320000  |
| C | 1.97942000  | -4.07798300 | 1.22262000  |
| C | 1.63950600  | -3.64780600 | -1.16830300 |
| C | 0.77079600  | -4.77760600 | 1.23983500  |
| C | 0.44128400  | -4.36774900 | -1.08530400 |
| C | -0.03301900 | -4.90703300 | 0.10631100  |
| H | 0.44516600  | -5.22641100 | 2.18227700  |
| H | -0.16715400 | -4.47825600 | -1.98669800 |
| C | 0.91645100  | 3.60630900  | -0.02566600 |
| C | -0.19991400 | 3.68827300  | 0.83619400  |
| C | 0.77029400  | 3.87238900  | -1.40454000 |
| C | -1.44564800 | 3.96033500  | 0.25492600  |
| C | -0.48815100 | 4.19852900  | -1.91544600 |
| C | -1.62192700 | 4.22795500  | -1.10278000 |
| H | -2.32696800 | 3.96453900  | 0.90378900  |
| H | -0.57891300 | 4.42381900  | -2.98035600 |
| C | 2.79804500  | -4.07887300 | 2.51281900  |
| C | 3.05445900  | -2.71294400 | 3.15946900  |
| C | 4.10522200  | -4.86423500 | 2.35392500  |
| H | 2.18088700  | -4.64192100 | 3.23077600  |
| H | 2.13881700  | -2.10990600 | 3.20899000  |
| H | 3.43176700  | -2.86421400 | 4.18221400  |
| H | 3.81494500  | -2.13409900 | 2.61653200  |
| H | 3.92065700  | -5.85798300 | 1.92124400  |
| H | 4.81148400  | -4.32962800 | 1.70308800  |
| H | 4.59010700  | -4.99792500 | 3.33289700  |
| C | 2.03803000  | -3.18053000 | -2.57356100 |
| C | 3.08789500  | -4.11525800 | -3.19005600 |
| C | 2.42436500  | -1.71185000 | -2.78238200 |
| H | 1.12028600  | -3.32029800 | -3.16562500 |
| H | 2.80079600  | -5.17011200 | -3.07281300 |
| H | 3.19866300  | -3.90304200 | -4.26449200 |
| H | 4.07247400  | -3.97211400 | -2.72350800 |
| H | 1.67008400  | -1.03707500 | -2.35598000 |
| H | 3.41416200  | -1.46107900 | -2.37659600 |
| H | 2.46352600  | -1.51341000 | -3.86512100 |
| C | -1.36641200 | -5.62732200 | 0.15925900  |
| C | -2.27789200 | -5.06041800 | 1.25087800  |
| C | -1.16783500 | -7.13709300 | 0.32676600  |
| H | -1.85891500 | -5.44614400 | -0.80950200 |
| H | -2.40882500 | -3.97722000 | 1.12300500  |
| H | -3.26481600 | -5.54693800 | 1.21238400  |
| H | -1.85631600 | -5.24731100 | 2.25138400  |
| H | -0.54374400 | -7.54913000 | -0.47915100 |
| H | -0.66942200 | -7.35769400 | 1.28371400  |
| H | -2.13507600 | -7.66209000 | 0.32095500  |



|   |             |             |             |
|---|-------------|-------------|-------------|
| C | -0.23321400 | 3.57642200  | 2.36906000  |
| C | -0.61808600 | 4.94715700  | 2.95293000  |
| C | 0.97466300  | 3.05545000  | 3.15458600  |
| H | -1.06664900 | 2.88297800  | 2.57442000  |
| H | -0.72759600 | 4.88076200  | 4.04592100  |
| H | 0.17264200  | 5.68242800  | 2.73583600  |
| H | -1.55648500 | 5.33413200  | 2.53348100  |
| H | 1.40249800  | 2.13728400  | 2.74088000  |
| H | 1.76824400  | 3.81101600  | 3.23051500  |
| H | 0.63901200  | 2.83650600  | 4.17975500  |
| C | 1.96114000  | 3.86101900  | -2.35503900 |
| C | 2.23611700  | 5.27054100  | -2.89021200 |
| C | 1.78315000  | 2.85645400  | -3.49513100 |
| H | 2.85119900  | 3.55273200  | -1.79048700 |
| H | 2.40439300  | 5.97965600  | -2.06677700 |
| H | 3.12626500  | 5.27233800  | -3.53693700 |
| H | 1.38622700  | 5.64047300  | -3.48429300 |
| H | 1.59252400  | 1.84839500  | -3.10028500 |
| H | 0.94140500  | 3.14125700  | -4.14754700 |
| H | 2.68851700  | 2.82257800  | -4.11989400 |
| C | -3.00897300 | 4.57763000  | -1.61892300 |
| C | -3.10879400 | 4.60895300  | -3.14023900 |
| C | -3.47458000 | 5.91432400  | -1.02748400 |
| H | -3.68643200 | 3.78278800  | -1.26568600 |
| H | -2.78480400 | 3.65534400  | -3.57830000 |
| H | -4.15211300 | 4.77732400  | -3.44312200 |
| H | -2.50210700 | 5.42381800  | -3.56598600 |
| H | -3.45998200 | 5.89974200  | 0.07151600  |
| H | -2.81367200 | 6.72954400  | -1.36074200 |
| H | -4.49940000 | 6.14715600  | -1.35289600 |
| O | -3.82564100 | 1.56593200  | -2.40661400 |
| H | -4.08856600 | 1.15716100  | -3.24021900 |
| H | -1.27385800 | -2.13697700 | -0.72295800 |
| O | 0.24722600  | 0.60337600  | 1.46975600  |
| H | -0.72975800 | 0.81255200  | 1.38999400  |

**Int2**<sub>IS-Sa-3R</sub>

|   |             |             |             |
|---|-------------|-------------|-------------|
| S | -3.22628200 | -0.25956200 | 1.71400000  |
| O | -2.26286000 | 0.54517400  | 2.43827600  |
| O | -2.79947700 | -1.19735800 | 0.66281600  |
| O | -1.71799700 | 2.74140100  | 0.65344400  |
| N | -4.27932200 | 1.30875800  | -0.27504500 |
| N | -3.04964700 | 1.45172300  | -0.84997200 |
| C | -4.13921800 | -1.22187100 | 2.89989900  |
| C | -4.11324400 | -0.82151800 | 4.23185200  |
| H | -3.55024300 | 0.06910400  | 4.51459700  |
| C | -4.79927300 | -1.59287800 | 5.17001900  |
| H | -4.79202700 | -1.30141900 | 6.22082300  |
| C | -5.48241800 | -2.73954200 | 4.76556100  |
| H | -6.01308700 | -3.34160900 | 5.50456900  |
| C | -5.48707700 | -3.12955500 | 3.42371900  |
| H | -6.01548400 | -4.03289500 | 3.11675800  |
| C | -4.80875500 | -2.36884100 | 2.47565600  |
| H | -4.78630400 | -2.65613100 | 1.42268400  |
| C | -4.50163400 | 0.71631400  | 0.95418600  |
| C | -5.81740100 | 0.82424300  | 1.31420600  |
| H | -6.27210500 | 0.41656100  | 2.21278700  |
| C | -6.46864100 | 1.52661300  | 0.24369900  |
| C | -5.48409100 | 1.80940000  | -0.73268500 |
| C | -5.78941800 | 2.46207200  | -1.93601200 |
| H | -5.02042100 | 2.66260000  | -2.68242600 |
| C | -7.10692500 | 2.83605000  | -2.13585500 |
| H | -7.38172500 | 3.34364800  | -3.06145900 |
| C | -8.10451500 | 2.57340300  | -1.17042800 |
| H | -9.13034800 | 2.88661800  | -1.36716500 |
| C | -7.79968600 | 1.92353400  | 0.01154900  |
| H | -8.57312000 | 1.71688400  | 0.75270400  |

|   |             |             |             |
|---|-------------|-------------|-------------|
| C | -2.74875400 | 0.74975000  | -2.07675900 |
| H | -3.64939600 | 0.65741400  | -2.70952900 |
| C | -1.65076800 | 1.59972600  | -2.66260500 |
| C | -0.91325800 | 1.37066200  | -3.82039900 |
| H | -1.19010800 | 0.57295500  | -4.51260300 |
| C | 0.22021500  | 2.15157200  | -4.04794800 |
| H | 0.81914800  | 1.98836400  | -4.94499300 |
| C | 0.61795200  | 3.11345200  | -3.11301500 |
| H | 1.52993500  | 3.69142000  | -3.27851100 |
| C | -0.13046000 | 3.33729100  | -1.95682300 |
| H | 0.18957700  | 4.05850200  | -1.20644500 |
| C | -1.28186900 | 2.58777700  | -1.75925800 |
| C | -2.26440200 | 2.70322900  | -0.60865000 |
| C | -3.10597300 | 3.97077400  | -0.73122400 |
| H | -3.90633000 | 3.96220200  | 0.02227800  |
| H | -3.53543300 | 4.08569100  | -1.73325000 |
| H | -2.44861700 | 4.82538600  | -0.52175500 |
| C | 2.19626100  | -2.35684000 | -0.08716300 |
| C | 3.51550000  | -1.97201100 | 0.01399700  |
| C | 4.51614500  | -2.86194600 | -0.51483200 |
| C | 4.12192000  | -4.16324900 | -0.94174500 |
| C | 2.74242100  | -4.51152700 | -0.96723300 |
| C | 1.76999200  | -3.60356200 | -0.63655600 |
| H | 6.19280200  | -1.48943800 | -0.35655100 |
| C | 5.88439600  | -2.49606600 | -0.63921600 |
| C | 5.10921400  | -5.07034700 | -1.41319900 |
| H | 2.45515600  | -5.49966900 | -1.33123300 |
| C | 6.42829300  | -4.69726900 | -1.49488600 |
| C | 6.81382000  | -3.38914800 | -1.11768900 |
| H | 4.79207300  | -6.06681900 | -1.72766000 |
| H | 7.17634700  | -5.39912800 | -1.86590300 |
| H | 7.85676900  | -3.08383300 | -1.21256600 |
| C | 3.85777300  | -0.67683400 | 0.66267000  |
| C | 4.83901800  | -0.61885500 | 1.71469600  |
| C | 3.21789600  | 0.49687400  | 0.29494500  |
| C | 5.39819600  | -1.78365600 | 2.31342100  |
| C | 5.25273800  | 0.65009400  | 2.20836900  |
| C | 3.58006800  | 1.76865900  | 0.82579700  |
| C | 6.34542000  | -1.68423500 | 3.30382100  |
| H | 5.05808600  | -2.76646400 | 1.98942200  |
| C | 6.24859300  | 0.72301500  | 3.22080500  |
| C | 4.61967400  | 1.82194600  | 1.72161900  |
| C | 6.79186000  | -0.41827400 | 3.75428600  |
| H | 6.75128900  | -2.59167000 | 3.75308200  |
| H | 6.55837300  | 1.70816200  | 3.57535900  |
| H | 4.92846800  | 2.79273300  | 2.11660400  |
| H | 7.55019300  | -0.35480900 | 4.53574600  |
| O | 2.23061500  | 0.47509000  | -0.67248100 |
| O | 1.21877600  | -1.52475100 | 0.41174700  |
| P | 0.78656400  | -0.20290100 | -0.41114900 |
| O | -0.20602100 | 0.56354500  | 0.36154800  |
| C | 2.83798800  | 3.02652800  | 0.49845300  |
| C | 3.20791000  | 3.81521500  | -0.62045100 |
| C | 1.85346500  | 3.48837200  | 1.39764400  |
| C | 2.60034900  | 5.06075400  | -0.79290900 |
| C | 1.24904800  | 4.73140000  | 1.14189000  |
| C | 1.61762800  | 5.54266200  | 0.07660500  |
| H | 2.91475100  | 5.67641200  | -1.64120300 |
| H | 0.46934500  | 5.07702400  | 1.82692300  |
| C | 0.31030900  | -3.80206800 | -0.87050500 |
| C | -0.20887000 | -3.78432900 | -2.18314300 |
| C | -0.56520000 | -3.85146400 | 0.23928900  |
| C | -1.60380600 | -3.77684800 | -2.34060400 |
| C | -1.93820500 | -3.86627100 | 0.01833600  |
| C | -2.48473500 | -3.78978900 | -1.26365200 |
| H | -1.99820100 | -3.71328900 | -3.35630100 |

|   |             |             |             |
|---|-------------|-------------|-------------|
| H | -2.60914000 | -3.86336300 | 0.88113500  |
| C | 4.31786800  | 3.46919600  | -1.61445900 |
| C | 4.26939900  | 2.07927000  | -2.25704700 |
| C | 5.70685500  | 3.75155600  | -1.02695700 |
| H | 4.17905300  | 4.18902700  | -2.43766400 |
| H | 3.24916300  | 1.79585400  | -2.54813600 |
| H | 4.90431000  | 2.07806500  | -3.15582200 |
| H | 4.66047000  | 1.30004500  | -1.58814400 |
| H | 5.76530500  | 4.77040600  | -0.61768200 |
| H | 5.94575200  | 3.04127000  | -0.22256900 |
| H | 6.47684500  | 3.64658700  | -1.80629700 |
| C | 1.44698200  | 2.86661100  | 2.74179800  |
| C | 2.19865100  | 3.59568800  | 3.86748400  |
| C | 1.53125200  | 1.35578900  | 2.97702200  |
| H | 0.37988700  | 3.12445700  | 2.84020000  |
| H | 2.08154900  | 4.68635200  | 3.79882300  |
| H | 1.82865100  | 3.26544000  | 4.84954600  |
| H | 3.27433500  | 3.36515600  | 3.81937200  |
| H | 1.05154400  | 0.78394300  | 2.17744200  |
| H | 2.56044700  | 1.00001000  | 3.11957500  |
| H | 0.97757300  | 1.12941000  | 3.90065600  |
| C | 0.99078400  | 6.91032900  | -0.12640500 |
| C | 0.33530800  | 7.05306300  | -1.50288800 |
| C | 2.02282000  | 8.01906700  | 0.10413900  |
| H | 0.20259600  | 7.01723100  | 0.63649900  |
| H | -0.43982000 | 6.29045700  | -1.66341900 |
| H | -0.13139300 | 8.04384800  | -1.60690200 |
| H | 1.07938400  | 6.94961400  | -2.30793200 |
| H | 2.47644200  | 7.93569200  | 1.10171300  |
| H | 2.83169700  | 7.95701500  | -0.64023600 |
| H | 1.55682100  | 9.01171600  | 0.01472700  |
| C | 0.58469100  | -3.78255600 | -3.49581100 |
| C | 0.85514700  | -5.21907400 | -3.96384800 |
| C | 1.85387100  | -2.92680300 | -3.61080500 |
| H | -0.12218600 | -3.35340700 | -4.22343500 |
| H | 1.29013500  | -5.21652100 | -4.97487800 |
| H | 1.56784200  | -5.72299400 | -3.29493000 |
| H | -0.06887700 | -5.81444200 | -3.98349700 |
| H | 1.73940800  | -1.95839800 | -3.10919900 |
| H | 2.74301000  | -3.42717300 | -3.20826600 |
| H | 2.04824000  | -2.73719400 | -4.67751600 |
| C | -0.06263200 | -3.90189400 | 1.67544200  |
| C | -0.25801600 | -5.30950300 | 2.25032800  |
| C | -0.71931600 | -2.84315600 | 2.56744100  |
| H | 1.01734100  | -3.70069100 | 1.67187100  |
| H | 0.25790500  | -6.06323700 | 1.63772000  |
| H | 0.13384000  | -5.36838900 | 3.27692900  |
| H | -1.32719300 | -5.57223000 | 2.27838600  |
| H | -0.62225400 | -1.83886200 | 2.13264500  |
| H | -1.79164500 | -3.05274900 | 2.71488600  |
| H | -0.24577000 | -2.84280300 | 3.56074500  |
| C | -3.99047700 | -3.65095600 | -1.41626400 |
| C | -4.71820300 | -4.90264200 | -0.91397700 |
| C | -4.43442500 | -3.29201900 | -2.83067100 |
| H | -4.26976800 | -2.80475000 | -0.76133500 |
| H | -4.43582000 | -5.14896000 | 0.12021000  |
| H | -5.80937700 | -4.76329500 | -0.95038800 |
| H | -4.46206800 | -5.76897700 | -1.54292600 |
| H | -3.92282500 | -2.38404100 | -3.18041300 |
| H | -4.21511300 | -4.10865900 | -3.53596000 |
| H | -5.51895600 | -3.11325900 | -2.85589900 |
| O | -2.23389500 | -0.56620700 | -1.88372700 |
| H | -2.47098000 | -0.87882700 | -0.97895700 |
| H | -1.14456400 | 1.95614900  | 0.76399200  |
| O | 0.36415800  | -0.64002500 | -1.85080100 |
| H | -0.64888900 | -0.65815300 | -1.94413900 |

**Int3***IS-Ra-3R*

|   |              |             |             |
|---|--------------|-------------|-------------|
| S | -5.65192400  | 0.61458000  | -1.28814400 |
| O | -5.10185400  | -0.68697800 | -1.70050800 |
| O | -5.53358700  | 1.75497600  | -2.19098900 |
| O | -1.35172900  | 2.91426900  | 0.92254400  |
| N | -3.55274800  | 0.88356500  | 0.49232000  |
| N | -2.51225300  | 1.24236700  | -0.34276800 |
| C | -7.36876200  | 0.38888100  | -0.90498400 |
| C | -7.81924500  | -0.88610100 | -0.57137100 |
| H | -7.11614200  | -1.72071600 | -0.55921100 |
| C | -9.16816000  | -1.05093800 | -0.26634100 |
| H | -9.54823000  | -2.03874600 | -0.00362700 |
| C | -10.03149900 | 0.04637100  | -0.30302800 |
| H | -11.08702800 | -0.08906400 | -0.06272900 |
| C | -9.55995200  | 1.31272500  | -0.65214700 |
| H | -10.24396000 | 2.16119100  | -0.68865100 |
| C | -8.21341900  | 1.49391100  | -0.96315000 |
| H | -7.81416900  | 2.46600700  | -1.25597400 |
| C | -4.93053100  | 0.96159600  | 0.29020300  |
| C | -5.59800700  | 0.83786400  | 1.48319600  |
| H | -6.67523500  | 0.76674300  | 1.60677600  |
| C | -4.60249400  | 0.71358600  | 2.50135100  |
| C | -3.34754600  | 0.70352600  | 1.85236600  |
| C | -2.14780500  | 0.51242500  | 2.55519000  |
| H | -1.19275000  | 0.49448000  | 2.03260600  |
| C | -2.24608800  | 0.34912500  | 3.92483200  |
| H | -1.33349300  | 0.19415100  | 4.50241300  |
| C | -3.49109600  | 0.38509900  | 4.59929500  |
| H | -3.51409700  | 0.26372600  | 5.68299200  |
| C | -4.66866700  | 0.56182300  | 3.90175600  |
| H | -5.63263200  | 0.57269100  | 4.41259400  |
| C | -2.48459000  | 0.74600800  | -1.71127500 |
| H | -3.42395800  | 0.89796600  | -2.25888100 |
| C | -1.40456600  | 1.59358600  | -2.31946900 |
| C | -0.69387900  | 1.36756200  | -3.49221900 |
| H | -0.93191200  | 0.51851300  | -4.13490200 |
| C | 0.36670700   | 2.22377200  | -3.78697600 |
| H | 0.95398300   | 2.06728200  | -4.69313900 |
| C | 0.71505100   | 3.25402000  | -2.90635800 |
| H | 1.57885000   | 3.88421500  | -3.12646800 |
| C | -0.00960300  | 3.47068700  | -1.73355000 |
| H | 0.28840600   | 4.23679100  | -1.01908100 |
| C | -1.09410700  | 2.64288700  | -1.47090700 |
| C | -2.00950600  | 2.65572000  | -0.26263900 |
| C | -3.15183700  | 3.65723600  | -0.38102800 |
| H | -3.76448100  | 3.60554500  | 0.53154300  |
| H | -3.78033700  | 3.43870100  | -1.25631500 |
| H | -2.73979500  | 4.67171100  | -0.46523800 |
| C | 2.20491100   | -2.40499600 | 0.05499100  |
| C | 3.52624600   | -2.28229900 | -0.32203500 |
| C | 4.10987900   | -3.36451000 | -1.06979100 |
| C | 3.36549300   | -4.56879100 | -1.23264300 |
| C | 2.02302400   | -4.64098500 | -0.76635300 |
| C | 1.40005800   | -3.55696200 | -0.20359500 |
| H | 5.95778100   | -2.34755000 | -1.58697000 |
| C | 5.39611300   | -3.27831300 | -1.66875700 |
| C | 3.95175800   | -5.66053300 | -1.92853700 |
| H | 1.45777700   | -5.56064400 | -0.93104700 |
| C | 5.20803700   | -5.55648800 | -2.47342600 |
| C | 5.92914800   | -4.34493700 | -2.35322100 |
| H | 3.37282200   | -6.58012300 | -2.03650200 |
| H | 5.64482500   | -6.39805500 | -3.01264000 |
| H | 6.91435300   | -4.25387000 | -2.81253800 |
| C | 4.28887900   | -1.06076100 | 0.06527000  |
| C | 5.55276400   | -1.15728900 | 0.74949700  |
| C | 3.76394800   | 0.20205100  | -0.15371300 |

|   |             |             |             |
|---|-------------|-------------|-------------|
| C | 6.09591200  | -2.39385700 | 1.20057100  |
| C | 6.28577400  | 0.03323500  | 1.02315900  |
| C | 4.43148200  | 1.40268200  | 0.22532400  |
| C | 7.31775400  | -2.44399300 | 1.82765400  |
| H | 5.52736900  | -3.31155700 | 1.05643100  |
| C | 7.55577400  | -0.05173300 | 1.65682700  |
| C | 5.69982800  | 1.29479700  | 0.73851800  |
| C | 8.06905600  | -1.26397700 | 2.04379700  |
| H | 7.70774800  | -3.40362300 | 2.16972800  |
| H | 8.10510900  | 0.87291700  | 1.84528400  |
| H | 6.24541600  | 2.20251200  | 1.00620800  |
| H | 9.04110000  | -1.31945800 | 2.53548700  |
| O | 2.55274700  | 0.34489400  | -0.79908600 |
| O | 1.61071600  | -1.36730700 | 0.74452400  |
| P | 1.15662800  | -0.06984000 | -0.11114800 |
| O | 0.53514600  | 0.93121100  | 0.77777800  |
| C | 3.72220800  | 2.72096000  | 0.19636100  |
| C | 3.72429300  | 3.54909100  | -0.94638900 |
| C | 3.08686000  | 3.15500800  | 1.38538600  |
| C | 3.10495100  | 4.80520500  | -0.87445300 |
| C | 2.44928000  | 4.40009200  | 1.37779800  |
| C | 2.45807700  | 5.25351300  | 0.27563000  |
| H | 3.15271700  | 5.45088400  | -1.75482000 |
| H | 1.95917700  | 4.73731000  | 2.29672600  |
| C | -0.05866300 | -3.49567400 | 0.11298600  |
| C | -1.03621000 | -3.53023400 | -0.90803700 |
| C | -0.45842900 | -3.29105900 | 1.45394500  |
| C | -2.37626700 | -3.33048700 | -0.54277700 |
| C | -1.80389300 | -3.07068800 | 1.75095400  |
| C | -2.78932500 | -3.05923800 | 0.76170800  |
| H | -3.12448500 | -3.35674800 | -1.34193000 |
| H | -2.08000800 | -2.89336100 | 2.79011700  |
| C | 4.46583400  | 3.23640900  | -2.24565600 |
| C | 4.19547200  | 1.87107100  | -2.88507800 |
| C | 5.97299300  | 3.47886500  | -2.09291700 |
| H | 4.10060200  | 3.98951800  | -2.96339000 |
| H | 3.12570700  | 1.62414500  | -2.88570900 |
| H | 4.55425300  | 1.88479300  | -3.92548800 |
| H | 4.73246400  | 1.06170900  | -2.37105700 |
| H | 6.17554000  | 4.48144100  | -1.68967200 |
| H | 6.42049000  | 2.73701600  | -1.41585300 |
| H | 6.47522000  | 3.38865700  | -3.06800500 |
| C | 3.15438900  | 2.48762800  | 2.76684700  |
| C | 4.37467600  | 3.02274900  | 3.53204600  |
| C | 3.08285000  | 0.96426000  | 2.90482300  |
| H | 2.26310700  | 2.87106000  | 3.28816600  |
| H | 4.40650800  | 4.12140200  | 3.52193900  |
| H | 4.34694700  | 2.68364300  | 4.57852100  |
| H | 5.30781800  | 2.64874700  | 3.08512500  |
| H | 2.24788400  | 0.54116600  | 2.33711100  |
| H | 4.01300700  | 0.45803600  | 2.61375800  |
| H | 2.90883000  | 0.72653700  | 3.96564800  |
| C | 1.78824400  | 6.61518600  | 0.38922800  |
| C | 0.26116200  | 6.51712600  | 0.26437400  |
| C | 2.33918500  | 7.64954700  | -0.58933800 |
| H | 2.00784300  | 6.97008700  | 1.41013300  |
| H | -0.14916100 | 5.70186300  | 0.87893100  |
| H | -0.21075300 | 7.46116400  | 0.57480100  |
| H | -0.02761100 | 6.33162600  | -0.78166200 |
| H | 3.43355300  | 7.72994200  | -0.52141400 |
| H | 2.07864400  | 7.39203200  | -1.62746200 |
| H | 1.90626900  | 8.63849200  | -0.38099900 |
| C | -0.83124900 | -3.79227000 | -2.40681700 |
| C | -1.09148600 | -5.27251500 | -2.72028500 |
| C | 0.44877200  | -3.31684500 | -3.10733600 |
| H | -1.64848700 | -3.22456800 | -2.87931800 |

|   |             |             |             |
|---|-------------|-------------|-------------|
| H | -1.07047100 | -5.44263700 | -3.80723300 |
| H | -0.31822300 | -5.90917800 | -2.26461600 |
| H | -2.06695800 | -5.60143500 | -2.33479500 |
| H | 0.80935900  | -2.35731200 | -2.71787700 |
| H | 1.26450500  | -4.04680600 | -3.03646200 |
| H | 0.22663000  | -3.18830200 | -4.17744800 |
| C | 0.52582100  | -3.36790200 | 2.61312200  |
| C | 0.34880300  | -4.69876800 | 3.35431800  |
| C | 0.40448800  | -2.18091000 | 3.57077200  |
| H | 1.54621300  | -3.35877000 | 2.20922600  |
| H | 0.48909400  | -5.55140200 | 2.67409600  |
| H | 1.07721600  | -4.78570100 | 4.17441800  |
| H | -0.66164500 | -4.77306500 | 3.78519100  |
| H | 0.46883100  | -1.22945300 | 3.02331500  |
| H | -0.54839100 | -2.20323200 | 4.12149900  |
| H | 1.21605700  | -2.20871400 | 4.31320100  |
| C | -4.24743000 | -2.73443200 | 1.06536400  |
| C | -4.55165700 | -2.69220900 | 2.56007500  |
| C | -5.20768700 | -3.69143900 | 0.35046900  |
| H | -4.42949300 | -1.72086900 | 0.65918900  |
| H | -3.92634600 | -1.95936700 | 3.08739200  |
| H | -5.60036100 | -2.40186400 | 2.72241600  |
| H | -4.39364300 | -3.68127600 | 3.01984900  |
| H | -5.16731700 | -3.58273800 | -0.74206600 |
| H | -4.97459100 | -4.73718700 | 0.60371400  |
| H | -6.24323500 | -3.49416700 | 0.66735000  |
| O | -2.14786500 | -0.61465000 | -1.77789100 |
| H | -2.93052400 | -1.14781700 | -1.55836600 |
| H | -0.56813000 | 2.33120100  | 0.95720600  |
| O | 0.38055100  | -0.60614300 | -1.35130200 |
| H | -0.62239800 | -0.70215900 | -1.34189100 |

**Int4***IR-Sa-3R*

|   |             |             |             |
|---|-------------|-------------|-------------|
| S | 5.55010200  | -0.44718500 | -0.09139200 |
| O | 5.24982300  | 0.10921100  | -1.40546900 |
| O | 5.70238700  | -1.87914800 | 0.13018800  |
| O | 1.21489400  | 2.73756500  | -0.81352900 |
| N | 3.07860300  | 0.66312900  | 0.92340100  |
| N | 2.26720700  | 0.67978700  | -0.19834800 |
| C | 7.08914200  | 0.29134500  | 0.45092700  |
| C | 7.38526900  | 1.60210500  | 0.08319500  |
| H | 6.67813100  | 2.17424400  | -0.51899100 |
| C | 8.59576600  | 2.15477200  | 0.49259900  |
| H | 8.84480400  | 3.17980600  | 0.21576600  |
| C | 9.49205700  | 1.39518400  | 1.24780300  |
| H | 10.44002000 | 1.83284400  | 1.56414400  |
| C | 9.18743100  | 0.07841200  | 1.59094400  |
| H | 9.89674500  | -0.51513100 | 2.16907800  |
| C | 7.97761000  | -0.48650500 | 1.18750700  |
| H | 7.71392400  | -1.51821500 | 1.42341600  |
| C | 4.40208900  | 0.24724400  | 1.10650100  |
| C | 4.77537100  | 0.47282100  | 2.40557200  |
| H | 5.74834400  | 0.24029400  | 2.83013200  |
| C | 3.67669100  | 1.10588300  | 3.06676500  |
| C | 2.64848200  | 1.24039200  | 2.10892300  |
| C | 1.46703700  | 1.95070700  | 2.38267100  |
| H | 0.72265700  | 2.14275000  | 1.61108500  |
| C | 1.31448100  | 2.44930700  | 3.66456400  |
| H | 0.40840700  | 3.00751200  | 3.90599500  |
| C | 2.30721800  | 2.27460400  | 4.65464600  |
| H | 2.14435800  | 2.68490300  | 5.65192000  |
| C | 3.48932000  | 1.61995600  | 4.36482000  |
| H | 4.27270800  | 1.51344300  | 5.11657900  |
| C | 2.21210800  | -0.58384500 | -1.02710700 |
| H | 1.22969400  | -1.06679400 | -0.87176700 |
| C | 2.30277300  | -0.05597900 | -2.42932000 |
| C | 2.32456000  | -0.79978300 | -3.60322100 |

|   |             |             |             |
|---|-------------|-------------|-------------|
| H | 2.33441900  | -1.89050600 | -3.56431800 |
| C | 2.33755900  | -0.11497300 | -4.81763300 |
| H | 2.36034700  | -0.67331200 | -5.75456400 |
| C | 2.31702200  | 1.28365000  | -4.84607700 |
| H | 2.31722400  | 1.80279300  | -5.80564700 |
| C | 2.30094900  | 2.01901600  | -3.66112800 |
| H | 2.28513200  | 3.11064200  | -3.67807400 |
| C | 2.30981000  | 1.32896500  | -2.45302600 |
| C | 2.31945600  | 1.92946400  | -1.06302600 |
| C | 3.55305300  | 2.77097300  | -0.78559600 |
| H | 3.55437100  | 3.11156400  | 0.26026200  |
| H | 3.50627100  | 3.65463600  | -1.43561200 |
| H | 4.45854700  | 2.19807100  | -1.01070900 |
| C | -2.56733800 | -2.02163300 | 0.09480800  |
| C | -3.82734000 | -1.65659900 | 0.53524400  |
| C | -4.50740500 | -2.55697000 | 1.43165000  |
| C | -3.96291300 | -3.85427400 | 1.65577700  |
| C | -2.69823900 | -4.18862400 | 1.10300500  |
| C | -1.95354700 | -3.26896900 | 0.40830200  |
| H | -6.10081700 | -1.19481100 | 2.01053600  |
| C | -5.69796100 | -2.20065900 | 2.12467900  |
| C | -4.65638800 | -4.77156400 | 2.49175000  |
| H | -2.28148100 | -5.17908400 | 1.29406200  |
| C | -5.82181000 | -4.40849000 | 3.11917100  |
| C | -6.33458600 | -3.10078100 | 2.94546800  |
| H | -4.22920400 | -5.76550500 | 2.63998700  |
| H | -6.34212000 | -5.11560100 | 3.76641300  |
| H | -7.24034900 | -2.80048600 | 3.47391400  |
| C | -4.44149800 | -0.36331900 | 0.12077000  |
| C | -5.78924100 | -0.26891100 | -0.37961600 |
| C | -3.71708000 | 0.80730000  | 0.20778200  |
| C | -6.57005800 | -1.41199500 | -0.70590400 |
| C | -6.36450200 | 1.02074000  | -0.57944900 |
| C | -4.23991700 | 2.10055200  | -0.08357400 |
| C | -7.86188000 | -1.28099800 | -1.15691900 |
| H | -6.12948900 | -2.40355800 | -0.60482400 |
| C | -7.70949100 | 1.12229800  | -1.02832300 |
| C | -5.57001300 | 2.18817600  | -0.40229000 |
| C | -8.44774700 | -0.00147500 | -1.30505700 |
| H | -8.43777400 | -2.17232500 | -1.40943800 |
| H | -8.13718500 | 2.11736400  | -1.16615100 |
| H | -6.01746800 | 3.16567500  | -0.59440600 |
| H | -9.47640200 | 0.08875000  | -1.65635500 |
| O | -2.41221700 | 0.76375000  | 0.65685500  |
| O | -1.85886200 | -1.19774800 | -0.75757000 |
| P | -1.23520300 | 0.21097500  | -0.28407900 |
| O | -0.80499200 | 0.99568000  | -1.46158600 |
| C | -3.24688900 | 3.21637300  | -0.12646000 |
| C | -2.76427900 | 3.80820300  | 1.06328000  |
| C | -2.64213700 | 3.51415200  | -1.36830500 |
| C | -1.63542500 | 4.62969400  | 0.99474400  |
| C | -1.51783800 | 4.34942700  | -1.37012700 |
| C | -0.97323500 | 4.88657600  | -0.20708000 |
| H | -1.26084500 | 5.07266400  | 1.92073000  |
| H | -1.02564700 | 4.56005400  | -2.32453500 |
| C | -0.53867400 | -3.55081700 | 0.01954800  |
| C | 0.45956000  | -3.66210900 | 1.01446900  |
| C | -0.20326500 | -3.73670300 | -1.34082100 |
| C | 1.75575300  | -4.01703100 | 0.60801100  |
| C | 1.10735200  | -4.07960900 | -1.68732900 |
| C | 2.10511400  | -4.24659200 | -0.72531900 |
| H | 2.52928900  | -4.12388600 | 1.37685700  |
| H | 1.34683400  | -4.23897400 | -2.74151600 |
| C | -3.43144600 | 3.66256000  | 2.43059500  |
| C | -3.40304600 | 2.26293100  | 3.05692000  |
| C | -4.85196500 | 4.23852300  | 2.43686000  |

|                                |             |             |             |
|--------------------------------|-------------|-------------|-------------|
| H                              | -2.83290600 | 4.30283400  | 3.09809100  |
| H                              | -2.40460800 | 1.80985100  | 2.99497400  |
| H                              | -3.68847000 | 2.33725100  | 4.11710400  |
| H                              | -4.11785000 | 1.57912500  | 2.57721300  |
| H                              | -4.86771800 | 5.25827100  | 2.02643600  |
| H                              | -5.53528500 | 3.61616400  | 1.84219300  |
| H                              | -5.24304000 | 4.27362300  | 3.46494300  |
| C                              | -3.14861600 | 3.08584100  | -2.75086600 |
| C                              | -4.27117800 | 4.03241400  | -3.19925200 |
| C                              | -3.54810000 | 1.62723300  | -3.01074600 |
| H                              | -2.29193800 | 3.27312900  | -3.41640700 |
| H                              | -3.96787100 | 5.08504800  | -3.10749700 |
| H                              | -4.54208400 | 3.83677500  | -4.24779200 |
| H                              | -5.17305400 | 3.88442300  | -2.58691100 |
| H                              | -2.79137300 | 0.92783300  | -2.63826100 |
| H                              | -4.52636800 | 1.36421100  | -2.58869100 |
| H                              | -3.62091100 | 1.48371200  | -4.09964900 |
| C                              | 0.26257500  | 5.76302400  | -0.28037300 |
| C                              | 1.20624400  | 5.56821400  | 0.90512900  |
| C                              | -0.13803500 | 7.23483200  | -0.43453500 |
| H                              | 0.80502800  | 5.45134700  | -1.18725700 |
| H                              | 1.45723400  | 4.50558900  | 1.02576200  |
| H                              | 2.13763500  | 6.13201200  | 0.74551100  |
| H                              | 0.76185700  | 5.93574400  | 1.84316900  |
| H                              | -0.77715100 | 7.38379700  | -1.31661200 |
| H                              | -0.70153000 | 7.57192000  | 0.44949700  |
| H                              | 0.75138600  | 7.87471000  | -0.53732600 |
| C                              | 0.28454400  | -3.47332900 | 2.52650800  |
| C                              | 0.03450000  | -4.81435100 | 3.23097000  |
| C                              | -0.69736300 | -2.40720900 | 3.02557500  |
| H                              | 1.27960900  | -3.13663800 | 2.85930400  |
| H                              | 0.10869200  | -4.68552800 | 4.32101100  |
| H                              | -0.97318800 | -5.19524000 | 3.01151900  |
| H                              | 0.76481400  | -5.57587600 | 2.92197800  |
| H                              | -0.61800300 | -1.47817100 | 2.44853100  |
| H                              | -1.74106800 | -2.74694900 | 3.00627700  |
| H                              | -0.45270500 | -2.17287800 | 4.07238600  |
| C                              | -1.23528600 | -3.62074000 | -2.45291500 |
| C                              | -1.47893400 | -4.98323400 | -3.11082300 |
| C                              | -0.83385700 | -2.56392300 | -3.48585000 |
| H                              | -2.18748400 | -3.30147900 | -2.01039100 |
| H                              | -1.80495800 | -5.72775100 | -2.37006400 |
| H                              | -2.25577700 | -4.90264900 | -3.88544000 |
| H                              | -0.56284100 | -5.36165500 | -3.58968500 |
| H                              | -0.62646900 | -1.59490200 | -3.00824000 |
| H                              | 0.06283400  | -2.87297000 | -4.04539000 |
| H                              | -1.64359900 | -2.41750400 | -4.21600300 |
| C                              | 3.51508100  | -4.69644900 | -1.07184400 |
| C                              | 4.06044900  | -4.10477200 | -2.37117200 |
| C                              | 3.56344500  | -6.22970200 | -1.09990500 |
| H                              | 4.17217200  | -4.34704800 | -0.25800300 |
| H                              | 4.08545700  | -3.00808400 | -2.32202300 |
| H                              | 5.08835600  | -4.45891900 | -2.53438400 |
| H                              | 3.46530400  | -4.42009200 | -3.24306400 |
| H                              | 3.21382000  | -6.65864100 | -0.14992700 |
| H                              | 2.91742000  | -6.61772900 | -1.90291100 |
| H                              | 4.58890200  | -6.58207100 | -1.28437700 |
| O                              | 3.19384900  | -1.48226800 | -0.69233300 |
| H                              | 2.83676000  | -2.15607300 | -0.09671100 |
| H                              | 0.41093600  | 2.30507100  | -1.16634300 |
| O                              | -0.10916700 | -0.05176600 | 0.77435000  |
| H                              | 0.77851500  | 0.34863300  | 0.46554600  |
| <b>Int5<sub>IR-Ra-3R</sub></b> |             |             |             |
| S                              | 2.80357200  | 0.37397700  | 1.76054500  |
| O                              | 2.25285800  | -0.98013800 | 1.50677000  |
| O                              | 1.95475400  | 1.51960000  | 1.48098200  |



|   |             |             |             |
|---|-------------|-------------|-------------|
| O | 2.46979800  | 2.22641800  | -1.17719600 |
| N | 4.46740100  | 0.08169900  | -0.41159100 |
| N | 3.46328800  | 0.07060200  | -1.32350200 |
| C | 3.28301700  | 0.45027700  | 3.46766700  |
| C | 3.62986700  | -0.72505900 | 4.13079600  |
| H | 3.60161800  | -1.67777000 | 3.59945300  |
| C | 4.00264100  | -0.64165000 | 5.46974500  |
| H | 4.27660900  | -1.54591900 | 6.01409400  |
| C | 4.01945100  | 0.59760200  | 6.11412800  |
| H | 4.31201600  | 0.65589100  | 7.16351500  |
| C | 3.65843500  | 1.76039800  | 5.43249000  |
| H | 3.66477900  | 2.72177300  | 5.94695900  |
| C | 3.27954900  | 1.69456400  | 4.09251600  |
| H | 2.97569800  | 2.58131800  | 3.53311100  |
| C | 4.36019700  | 0.40074900  | 0.93145700  |
| C | 5.59718000  | 0.47285600  | 1.51757500  |
| H | 5.80194800  | 0.66412000  | 2.56710000  |
| C | 6.54664100  | 0.19182800  | 0.48092700  |
| C | 5.81103400  | -0.05763100 | -0.69991600 |
| C | 6.43587200  | -0.38454900 | -1.91151200 |
| H | 5.84634400  | -0.58151700 | -2.80552000 |
| C | 7.81628400  | -0.45705100 | -1.91317700 |
| H | 8.33568000  | -0.71527600 | -2.83709200 |
| C | 8.57240800  | -0.21025800 | -0.74333500 |
| H | 9.65976300  | -0.27903700 | -0.78864300 |
| C | 7.95345200  | 0.11074900  | 0.44928600  |
| H | 8.53692700  | 0.29730700  | 1.35200300  |
| C | 2.75887200  | -1.15224600 | -1.67936300 |
| H | 2.18881500  | -1.55826900 | -0.82867300 |
| C | 1.88058200  | -0.64249200 | -2.79498300 |
| C | 0.97347500  | -1.36606000 | -3.55898400 |
| H | 0.78439200  | -2.41918600 | -3.34199000 |
| C | 0.29133300  | -0.70437400 | -4.58227700 |
| H | -0.43452500 | -1.24942100 | -5.18829900 |
| C | 0.51897400  | 0.65221400  | -4.82891400 |
| H | -0.02440300 | 1.15375200  | -5.63187700 |
| C | 1.42366400  | 1.37429200  | -4.04776600 |
| H | 1.59451200  | 2.43798100  | -4.22870100 |
| C | 2.10095400  | 0.70936300  | -3.03358900 |
| C | 3.06884800  | 1.30423900  | -2.02788500 |
| C | 4.24441900  | 2.03190000  | -2.66495100 |
| H | 3.87061700  | 2.93941100  | -3.15781600 |
| H | 4.75396200  | 1.40280300  | -3.40485600 |
| H | 4.95891300  | 2.33760500  | -1.88671900 |
| C | -2.83279700 | -1.59666600 | 0.24955900  |
| C | -3.95007500 | -0.87078700 | 0.61580500  |
| C | -4.90439700 | -1.50268600 | 1.48801600  |
| C | -4.74978300 | -2.88458300 | 1.80069600  |
| C | -3.61255100 | -3.59169900 | 1.32388900  |
| C | -2.62253200 | -2.95854000 | 0.61914300  |
| H | -6.09343700 | 0.27247400  | 1.88517400  |
| C | -5.98839400 | -0.79511900 | 2.07803000  |
| C | -5.70933000 | -3.52309800 | 2.63279100  |
| H | -3.49664700 | -4.64699300 | 1.58243200  |
| C | -6.76094600 | -2.81900400 | 3.16476100  |
| C | -6.88987400 | -1.43576100 | 2.89417200  |
| H | -5.58220600 | -4.58510900 | 2.85256800  |
| H | -7.48732900 | -3.31732600 | 3.80812500  |
| H | -7.70822000 | -0.87066300 | 3.34242100  |
| C | -4.12147400 | 0.52342400  | 0.12269800  |
| C | -5.32709900 | 0.96015500  | -0.53135100 |
| C | -3.08628500 | 1.43075000  | 0.23672600  |
| C | -6.38589900 | 0.07153800  | -0.86983100 |
| C | -5.46508400 | 2.33468300  | -0.88250700 |
| C | -3.16809400 | 2.78332800  | -0.20467600 |
| C | -7.53167200 | 0.53294600  | -1.47273500 |

|   |             |             |             |
|---|-------------|-------------|-------------|
| H | -6.27843900 | -0.99115100 | -0.65446700 |
| C | -6.66949700 | 2.78464300  | -1.48920100 |
| C | -4.37218400 | 3.22361500  | -0.69057100 |
| C | -7.68635900 | 1.90741500  | -1.77289400 |
| H | -8.32626800 | -0.16935800 | -1.72848700 |
| H | -6.76021100 | 3.84342500  | -1.74045600 |
| H | -4.47869000 | 4.26579100  | -0.99844500 |
| H | -8.60378300 | 2.26170000  | -2.24470000 |
| O | -1.91148800 | 1.05797600  | 0.84832500  |
| O | -1.85975900 | -1.00271300 | -0.53441300 |
| P | -0.84920400 | 0.04162000  | 0.19117600  |
| O | 0.15578500  | 0.57459800  | -0.74597200 |
| C | -1.90194700 | 3.57644500  | -0.22794000 |
| C | -1.39592800 | 4.19534700  | 0.93736700  |
| C | -1.14441000 | 3.57256100  | -1.42128000 |
| C | -0.11257900 | 4.74632000  | 0.89880800  |
| C | 0.13393400  | 4.14299500  | -1.39354800 |
| C | 0.68370700  | 4.70620800  | -0.24609900 |
| H | 0.27661400  | 5.21534600  | 1.80675600  |
| H | 0.74206000  | 4.11222900  | -2.30105500 |
| C | -1.35067800 | -3.61006800 | 0.18475500  |
| C | -0.24877500 | -3.75856600 | 1.05676600  |
| C | -1.23204500 | -3.97114500 | -1.17513100 |
| C | 0.96207600  | -4.19263400 | 0.50049500  |
| C | -0.01501900 | -4.45819900 | -1.65783500 |
| C | 1.10954700  | -4.55617200 | -0.83814600 |
| H | 1.83763500  | -4.25735500 | 1.15444300  |
| H | 0.05207300  | -4.75408100 | -2.70728300 |
| C | -2.18298000 | 4.36937100  | 2.23540700  |
| C | -2.57297300 | 3.08129100  | 2.96925600  |
| C | -3.39793000 | 5.28578400  | 2.04981500  |
| H | -1.49136500 | 4.90171700  | 2.90756400  |
| H | -1.72918900 | 2.38224400  | 3.03426000  |
| H | -2.90277700 | 3.33259100  | 3.98881800  |
| H | -3.40776000 | 2.56148700  | 2.47811400  |
| H | -3.11244200 | 6.22782700  | 1.55999100  |
| H | -4.17181400 | 4.79962300  | 1.43931900  |
| H | -3.84606300 | 5.52573300  | 3.02609700  |
| C | -1.61527800 | 3.06792100  | -2.79069500 |
| C | -2.54726600 | 4.08324000  | -3.46634400 |
| C | -2.18290900 | 1.64843200  | -2.89912100 |
| H | -0.69410700 | 3.05188800  | -3.39310100 |
| H | -2.13079300 | 5.09971900  | -3.41892500 |
| H | -2.69223300 | 3.81684000  | -4.52458500 |
| H | -3.53839300 | 4.09408400  | -2.99187600 |
| H | -1.50928100 | 0.91500600  | -2.43583400 |
| H | -3.18971100 | 1.54781100  | -2.47070200 |
| H | -2.26248000 | 1.38628800  | -3.96601700 |
| C | 2.08389200  | 5.28917600  | -0.26270700 |
| C | 2.95245200  | 4.74388600  | 0.87315400  |
| C | 2.03398800  | 6.82037600  | -0.24013000 |
| H | 2.54477000  | 4.96592100  | -1.20919000 |
| H | 2.98624300  | 3.64725200  | 0.82858600  |
| H | 3.97691000  | 5.13874400  | 0.79175100  |
| H | 2.55686400  | 5.04954900  | 1.85544800  |
| H | 1.44105300  | 7.21192300  | -1.07913100 |
| H | 1.57151900  | 7.17852900  | 0.69313300  |
| H | 3.04694200  | 7.24650100  | -0.30124100 |
| C | -0.20188000 | -3.55786300 | 2.58029200  |
| C | 0.03789500  | -4.92378000 | 3.24726000  |
| C | -1.34787700 | -2.86743200 | 3.32658600  |
| H | 0.70013400  | -2.94403900 | 2.74971000  |
| H | 0.15314500  | -4.80424800 | 4.33502600  |
| H | -0.82553800 | -5.58357100 | 3.06824600  |
| H | 0.93094100  | -5.43078300 | 2.85803800  |
| H | -1.67693900 | -1.93558600 | 2.85703500  |

|                         |              |             |             |
|-------------------------|--------------|-------------|-------------|
| H                       | -2.21595100  | -3.53051600 | 3.44110000  |
| H                       | -0.99145500  | -2.62605300 | 4.33961700  |
| C                       | -2.41234700  | -3.88420000 | -2.13456000 |
| C                       | -2.84569800  | -5.28444500 | -2.58205100 |
| C                       | -2.11856700  | -2.98103800 | -3.33422300 |
| H                       | -3.26169200  | -3.44071100 | -1.59789700 |
| H                       | -3.09716900  | -5.91523700 | -1.71714500 |
| H                       | -3.72789100  | -5.22599000 | -3.23694100 |
| H                       | -2.04168200  | -5.78640400 | -3.14216700 |
| H                       | -1.81361300  | -1.97839000 | -3.00231600 |
| H                       | -1.31478900  | -3.40099400 | -3.96129000 |
| H                       | -3.01357100  | -2.88319600 | -3.96704800 |
| C                       | 2.44808200   | -5.09170800 | -1.31969400 |
| C                       | 2.57519700   | -5.15128200 | -2.83838900 |
| C                       | 2.71572400   | -6.47198100 | -0.70613900 |
| H                       | 3.21547400   | -4.38990200 | -0.95596600 |
| H                       | 2.37101400   | -4.17143000 | -3.29121100 |
| H                       | 3.59676500   | -5.44640400 | -3.11835300 |
| H                       | 1.88622700   | -5.89305900 | -3.27210900 |
| H                       | 2.68002500   | -6.43983300 | 0.39209400  |
| H                       | 1.95675600   | -7.19412300 | -1.04510300 |
| H                       | 3.70574200   | -6.84655900 | -1.00644700 |
| O                       | 3.61894600   | -2.18844400 | -2.07244200 |
| H                       | 3.94095100   | -1.99339400 | -2.96184400 |
| H                       | 1.64249700   | 1.84764300  | -0.81918800 |
| O                       | -0.32279100  | -0.66995600 | 1.48554100  |
| H                       | 0.64578200   | -0.90407000 | 1.45484900  |
| <b>TS6<sub>Si</sub></b> |              |             |             |
| S                       | -5.06759300  | 0.16579000  | -1.21299500 |
| O                       | -4.37142100  | -0.67141000 | -2.17585800 |
| O                       | -4.92104200  | 1.62438300  | -1.27144600 |
| O                       | -2.93700600  | 4.30347400  | 0.53368600  |
| N                       | -3.28614400  | -0.31502500 | 0.78802000  |
| N                       | -2.31762400  | 0.24833600  | -0.00662400 |
| C                       | -6.80001100  | -0.22042200 | -1.24744000 |
| C                       | -7.18648200  | -1.48081500 | -1.69714000 |
| H                       | -6.42864400  | -2.18791300 | -2.03879100 |
| C                       | -8.54414000  | -1.79339300 | -1.70321400 |
| H                       | -8.87413200  | -2.77245400 | -2.05205200 |
| C                       | -9.47909000  | -0.85231400 | -1.26789100 |
| H                       | -10.54083000 | -1.10313100 | -1.27515700 |
| C                       | -9.07029400  | 0.40828600  | -0.82870200 |
| H                       | -9.80916100  | 1.13907600  | -0.49812500 |
| C                       | -7.71608700  | 0.73636300  | -0.81747800 |
| H                       | -7.36230400  | 1.71455600  | -0.48867100 |
| C                       | -4.61651600  | -0.35419000 | 0.42118300  |
| C                       | -5.38777800  | -0.78198500 | 1.46737500  |
| H                       | -6.46521700  | -0.92280900 | 1.45264200  |
| C                       | -4.48512300  | -1.00751500 | 2.56301300  |
| C                       | -3.17821500  | -0.70597800 | 2.10916500  |
| C                       | -2.04344700  | -0.81297600 | 2.92308800  |
| H                       | -1.05028800  | -0.55927700 | 2.54910600  |
| C                       | -2.25818800  | -1.22685200 | 4.22726600  |
| H                       | -1.40234800  | -1.31812700 | 4.89763800  |
| C                       | -3.55283800  | -1.52345700 | 4.71303500  |
| H                       | -3.67112600  | -1.84098300 | 5.74970300  |
| C                       | -4.66454200  | -1.42095300 | 3.89747600  |
| H                       | -5.66123700  | -1.65740300 | 4.27277800  |
| C                       | -2.27222200  | 1.58303600  | -0.05810200 |
| H                       | -3.14266700  | 2.06073600  | 0.38511500  |
| C                       | -1.68541700  | 2.28218200  | -1.23407900 |
| C                       | -0.77089200  | 1.65839900  | -2.08917000 |
| H                       | -0.41108300  | 0.65344300  | -1.86884800 |
| C                       | -0.32745000  | 2.30484000  | -3.24122300 |
| H                       | 0.39191100   | 1.80457000  | -3.89035300 |
| C                       | -0.81705200  | 3.56431000  | -3.57391100 |

|   |             |             |             |
|---|-------------|-------------|-------------|
| H | -0.48055100 | 4.06521200  | -4.48289300 |
| C | -1.75667700 | 4.17677300  | -2.74902700 |
| H | -2.14936400 | 5.15834600  | -3.01810300 |
| C | -2.17973700 | 3.56024000  | -1.56931800 |
| C | -3.13612700 | 4.28403100  | -0.66149900 |
| C | -4.34400700 | 4.92887500  | -1.28350800 |
| H | -4.89691300 | 5.47807800  | -0.51361900 |
| H | -4.96440100 | 4.11958000  | -1.69965100 |
| H | -4.07182200 | 5.60088900  | -2.10827000 |
| C | 2.74864400  | -2.30192200 | -0.01459800 |
| C | 3.93693600  | -1.78947000 | -0.49879900 |
| C | 4.68281000  | -2.59337900 | -1.43336100 |
| C | 4.25875400  | -3.93166900 | -1.68394300 |
| C | 3.01926200  | -4.38908000 | -1.15578300 |
| C | 2.21176000  | -3.56274600 | -0.41770200 |
| H | 6.12093500  | -1.06872000 | -2.00847100 |
| C | 5.81710100  | -2.10669700 | -2.14049500 |
| C | 5.02351000  | -4.75565300 | -2.55349800 |
| H | 2.66791100  | -5.38757600 | -1.42266200 |
| C | 6.13916100  | -4.26826000 | -3.18848900 |
| C | 6.52507300  | -2.92132500 | -2.99232900 |
| H | 4.68952600  | -5.78142400 | -2.72325500 |
| H | 6.71403000  | -4.90746900 | -3.85994300 |
| H | 7.38793900  | -2.52192500 | -3.52717000 |
| C | 4.36626500  | -0.42330100 | -0.08839900 |
| C | 5.69980600  | -0.14493600 | 0.37774700  |
| C | 3.45922000  | 0.62394600  | -0.12597500 |
| C | 6.64738400  | -1.17090100 | 0.65214300  |
| C | 6.09144100  | 1.20646000  | 0.60348300  |
| C | 3.80988000  | 1.96307300  | 0.21710100  |
| C | 7.92090700  | -0.86617200 | 1.06934500  |
| H | 6.34937700  | -2.21269000 | 0.53775700  |
| C | 7.42144400  | 1.49199500  | 1.01643200  |
| C | 5.12282400  | 2.24120300  | 0.49950500  |
| C | 8.32280100  | 0.48070400  | 1.23733800  |
| H | 8.62581100  | -1.67147900 | 1.28064200  |
| H | 7.70436000  | 2.53497800  | 1.17326000  |
| H | 5.41824000  | 3.26713400  | 0.73206900  |
| H | 9.33887400  | 0.70945800  | 1.56157100  |
| O | 2.17327800  | 0.41212800  | -0.55597200 |
| O | 2.02964600  | -1.57843900 | 0.90946400  |
| P | 1.07435500  | -0.37334600 | 0.37491100  |
| O | 0.00275500  | -0.86131300 | -0.55352300 |
| H | -1.50886300 | -0.36002200 | -0.31715300 |
| O | 0.67619400  | 0.44876000  | 1.57225500  |
| C | 2.73427500  | 2.98932700  | 0.36865100  |
| C | 2.23068900  | 3.70659400  | -0.73712900 |
| C | 2.22411500  | 3.23317400  | 1.66589900  |
| C | 1.22810300  | 4.66539400  | -0.52757400 |
| C | 1.22179500  | 4.20052500  | 1.80934900  |
| C | 0.71996600  | 4.94836300  | 0.74092200  |
| H | 0.86940000  | 5.22469000  | -1.39462200 |
| H | 0.83917600  | 4.39522500  | 2.81639100  |
| C | 0.77425500  | -3.83758900 | -0.12403800 |
| C | -0.17899800 | -3.70957800 | -1.16254900 |
| C | 0.35068200  | -4.04413700 | 1.20096000  |
| C | -1.53100900 | -3.80105600 | -0.82305600 |
| C | -1.01592200 | -4.14733200 | 1.48076200  |
| C | -1.97962700 | -4.01638500 | 0.48228300  |
| H | -2.26966700 | -3.65273000 | -1.61600200 |
| H | -1.32355400 | -4.31215400 | 2.51405400  |
| C | 2.82309300  | 3.66551800  | -2.14626300 |
| C | 3.15856400  | 2.30385300  | -2.76316300 |
| C | 4.04781900  | 4.58924500  | -2.20910400 |
| H | 2.04705900  | 4.11454000  | -2.78763400 |
| H | 2.37748500  | 1.55814700  | -2.57171600 |

|              |             |             |             |
|--------------|-------------|-------------|-------------|
| H            | 3.27090700  | 2.42596700  | -3.85160500 |
| H            | 4.10916300  | 1.90347500  | -2.38455400 |
| H            | 3.80321100  | 5.60245700  | -1.85991800 |
| H            | 4.85562600  | 4.19331800  | -1.57523300 |
| H            | 4.42858400  | 4.65600100  | -3.23957400 |
| C            | 2.75278100  | 2.67224000  | 2.99472000  |
| C            | 3.76726200  | 3.66894800  | 3.57829700  |
| C            | 3.31653500  | 1.25063200  | 3.09718400  |
| H            | 1.87083700  | 2.68772200  | 3.65510000  |
| H            | 3.35926400  | 4.68910100  | 3.62016600  |
| H            | 4.05896700  | 3.36637400  | 4.59507700  |
| H            | 4.67847000  | 3.69259700  | 2.96130300  |
| H            | 2.66197300  | 0.51265000  | 2.62404800  |
| H            | 4.32830900  | 1.15992800  | 2.68198200  |
| H            | 3.38578900  | 0.99616300  | 4.16597800  |
| C            | -0.27767500 | 6.06705500  | 1.01852000  |
| C            | -0.77015200 | 6.77820700  | -0.23763500 |
| C            | 0.32826600  | 7.09523200  | 1.98345800  |
| H            | -1.15451600 | 5.61295500  | 1.51057400  |
| H            | -1.18551900 | 6.07553100  | -0.97123400 |
| H            | -1.55171200 | 7.50646000  | 0.02225800  |
| H            | 0.05096600  | 7.32500200  | -0.72752900 |
| H            | 0.63463700  | 6.63805600  | 2.93378000  |
| H            | 1.21726000  | 7.56165000  | 1.53157500  |
| H            | -0.40021700 | 7.88810800  | 2.20849200  |
| C            | 0.10433500  | -3.47323800 | -2.65084400 |
| C            | 0.31881800  | -4.80248800 | -3.38756900 |
| C            | 1.17707600  | -2.45249200 | -3.05606500 |
| H            | -0.84430700 | -3.06222800 | -3.02974100 |
| H            | 0.34619300  | -4.63520100 | -4.47518300 |
| H            | 1.27385800  | -5.26483300 | -3.09901900 |
| H            | -0.48698400 | -5.51697500 | -3.16592000 |
| H            | 1.12886300  | -1.55145100 | -2.43309900 |
| H            | 2.19558400  | -2.85874900 | -3.00942100 |
| H            | 0.99764000  | -2.15970600 | -4.10232000 |
| C            | 1.34093000  | -4.17910800 | 2.34792800  |
| C            | 1.40902900  | -5.63342100 | 2.82696100  |
| C            | 1.02006300  | -3.22786200 | 3.50392600  |
| H            | 2.33813300  | -3.91040100 | 1.97193900  |
| H            | 1.68811400  | -6.30695100 | 2.00372100  |
| H            | 2.15009300  | -5.74460000 | 3.63286700  |
| H            | 0.43229300  | -5.96237800 | 3.21471500  |
| H            | 0.96251200  | -2.18905100 | 3.14801900  |
| H            | 0.06391300  | -3.48789200 | 3.98425700  |
| H            | 1.80446300  | -3.28570900 | 4.27351600  |
| C            | -3.47491600 | -4.06784900 | 0.76510500  |
| C            | -3.80255100 | -4.32201900 | 2.23243000  |
| C            | -4.17746600 | -5.10746000 | -0.11566100 |
| H            | -3.87741100 | -3.07296500 | 0.49519200  |
| H            | -3.32519100 | -3.58599700 | 2.89280900  |
| H            | -4.88881500 | -4.26282300 | 2.39648500  |
| H            | -3.46702900 | -5.32662600 | 2.53647400  |
| H            | -4.01465800 | -4.92178700 | -1.18579800 |
| H            | -3.79913200 | -6.11592600 | 0.11246000  |
| H            | -5.26228800 | -5.09880100 | 0.07000100  |
| O            | -1.17931700 | 2.15674700  | 1.38265700  |
| H            | -0.88004000 | 3.06573800  | 1.21400600  |
| H            | -0.36452600 | 1.53729900  | 1.46018500  |
| <b>Int6s</b> |             |             |             |
| S            | -5.30870000 | 0.27959400  | -1.09598600 |
| O            | -4.79659800 | -0.87124900 | -1.83066400 |
| O            | -5.00542100 | 1.63872200  | -1.53391300 |
| O            | -1.91503000 | 4.57068700  | 0.43856200  |
| N            | -3.48240900 | 0.06130600  | 0.86894700  |
| N            | -2.55929800 | 0.41432300  | -0.08371100 |
| C            | -7.07633300 | 0.11264000  | -0.97104000 |

|   |              |             |             |
|---|--------------|-------------|-------------|
| C | -7.63302900  | -1.16237200 | -1.04065300 |
| H | -6.98431700  | -2.02572600 | -1.19953100 |
| C | -9.01446000  | -1.29117900 | -0.91313500 |
| H | -9.47511500  | -2.27832000 | -0.96546300 |
| C | -9.80698800  | -0.15702900 | -0.72509300 |
| H | -10.88832900 | -0.26399800 | -0.62683000 |
| C | -9.23011200  | 1.11271400  | -0.66853600 |
| H | -9.85822200  | 1.99357800  | -0.53066900 |
| C | -7.84938500  | 1.25671600  | -0.79392300 |
| H | -7.36446100  | 2.23358200  | -0.76619500 |
| C | -4.82863600  | 0.11084700  | 0.60220300  |
| C | -5.56295800  | -0.06720900 | 1.74499400  |
| H | -6.64664500  | -0.10357200 | 1.81561200  |
| C | -4.60272800  | -0.24184500 | 2.80029400  |
| C | -3.31266200  | -0.15441300 | 2.21884200  |
| C | -2.13380700  | -0.32161500 | 2.95809800  |
| H | -1.15529500  | -0.24989500 | 2.48284300  |
| C | -2.27640800  | -0.57592800 | 4.31092700  |
| H | -1.38291800  | -0.71511900 | 4.92143700  |
| C | -3.55127500  | -0.65572100 | 4.91991500  |
| H | -3.61599100  | -0.85469400 | 5.99034900  |
| C | -4.70975700  | -0.49116700 | 4.18291500  |
| H | -5.69004600  | -0.56516300 | 4.65623800  |
| C | -2.20918000  | 1.80025300  | -0.09123500 |
| H | -3.12062900  | 2.34476500  | 0.20282300  |
| C | -1.81035600  | 2.29290500  | -1.47876900 |
| C | -1.58882000  | 1.38484900  | -2.51546100 |
| H | -1.70343200  | 0.32120600  | -2.32254000 |
| C | -1.22858000  | 1.81899900  | -3.78790700 |
| H | -1.04123200  | 1.08316000  | -4.57118400 |
| C | -1.12106800  | 3.18023100  | -4.06271700 |
| H | -0.83842300  | 3.52576800  | -5.05766400 |
| C | -1.41047800  | 4.09881400  | -3.06192700 |
| H | -1.36645000  | 5.16435100  | -3.28910400 |
| C | -1.74801900  | 3.67546300  | -1.76715400 |
| C | -2.10446700  | 4.72009500  | -0.75684500 |
| C | -2.76422400  | 5.98661700  | -1.24794600 |
| H | -3.07369300  | 6.57682000  | -0.37856400 |
| H | -3.63039100  | 5.74015300  | -1.87771600 |
| H | -2.06772800  | 6.58055000  | -1.85525300 |
| C | 2.31099500   | -2.38559000 | -0.13097600 |
| C | 3.60970900   | -2.19672600 | -0.55813100 |
| C | 4.13911100   | -3.12725300 | -1.52054800 |
| C | 3.36590800   | -4.27367700 | -1.86764700 |
| C | 2.04359500   | -4.41434500 | -1.36345800 |
| C | 1.47354800   | -3.45130600 | -0.57045300 |
| H | 5.97265000   | -2.04215900 | -1.95235200 |
| C | 5.39277300   | -2.93970400 | -2.16585200 |
| C | 3.89826700   | -5.22293200 | -2.78204500 |
| H | 1.44677100   | -5.27341700 | -1.67716500 |
| C | 5.12791300   | -5.03115700 | -3.36165100 |
| C | 5.87284500   | -3.86624600 | -3.06069100 |
| H | 3.29743400   | -6.10084400 | -3.02797300 |
| H | 5.52339900   | -5.76257400 | -4.06766000 |
| H | 6.83382100   | -3.69728300 | -3.54847100 |
| C | 4.38496200   | -1.02793900 | -0.05848200 |
| C | 5.71179400   | -1.16098900 | 0.48322400  |
| C | 3.82256900   | 0.23549100  | -0.08237400 |
| C | 6.31384200   | -2.42569100 | 0.73455000  |
| C | 6.45194700   | 0.01290100  | 0.80831200  |
| C | 4.51727400   | 1.41021500  | 0.32641700  |
| C | 7.59238000   | -2.51440000 | 1.23067600  |
| H | 5.74431900   | -3.33374500 | 0.53827900  |
| C | 7.77878900   | -0.11115000 | 1.30363900  |
| C | 5.82997800   | 1.28648700  | 0.70253600  |
| C | 8.34324900   | -1.34601700 | 1.50429900  |

|   |             |             |             |
|---|-------------|-------------|-------------|
| H | 8.02932300  | -3.49540400 | 1.42222300  |
| H | 8.33361400  | 0.79980800  | 1.53715500  |
| H | 6.39322100  | 2.17663500  | 0.99203100  |
| H | 9.35969700  | -1.43045800 | 1.89088600  |
| O | 2.55044400  | 0.42519000  | -0.57780300 |
| O | 1.76596000  | -1.49084800 | 0.77771600  |
| P | 1.20943800  | -0.11491500 | 0.14011700  |
| O | 0.10380300  | -0.22837200 | -0.82979700 |
| H | -1.79428500 | -0.25430200 | -0.20912200 |
| O | 0.89491500  | 0.74565800  | 1.40871400  |
| C | 3.73463800  | 2.67815200  | 0.42591900  |
| C | 3.50331700  | 3.48952200  | -0.70528700 |
| C | 3.12897700  | 2.98932700  | 1.66521000  |
| C | 2.64173300  | 4.58535500  | -0.58205300 |
| C | 2.26451100  | 4.08845800  | 1.71883000  |
| C | 1.99822900  | 4.89721900  | 0.61462700  |
| H | 2.47311400  | 5.20317500  | -1.46562500 |
| H | 1.78292300  | 4.32403700  | 2.67354400  |
| C | 0.03163300  | -3.44321300 | -0.18473200 |
| C | -0.96958800 | -3.11812200 | -1.13083800 |
| C | -0.31647800 | -3.67758800 | 1.16023800  |
| C | -2.29497800 | -3.04834500 | -0.68509800 |
| C | -1.66162800 | -3.64824100 | 1.53845500  |
| C | -2.67144800 | -3.34009400 | 0.62919600  |
| H | -3.07000200 | -2.74810100 | -1.39805500 |
| H | -1.91515300 | -3.86421400 | 2.57717100  |
| C | 4.18356600  | 3.30476600  | -2.06137700 |
| C | 3.89134700  | 1.98943700  | -2.79237200 |
| C | 5.69169800  | 3.57180700  | -1.98880500 |
| H | 3.75781900  | 4.10056800  | -2.69275400 |
| H | 2.82035300  | 1.74847600  | -2.78069400 |
| H | 4.21910100  | 2.08020700  | -3.83896900 |
| H | 4.43695700  | 1.14148400  | -2.35516700 |
| H | 5.90185000  | 4.53200600  | -1.49596100 |
| H | 6.20995800  | 2.77713000  | -1.43434400 |
| H | 6.11914000  | 3.60345600  | -3.00243400 |
| C | 3.41497800  | 2.32072900  | 3.01644300  |
| C | 4.60855800  | 3.02857500  | 3.67561300  |
| C | 3.59369000  | 0.80105700  | 3.12551300  |
| H | 2.52777700  | 2.55752600  | 3.62460900  |
| H | 4.46201300  | 4.11748300  | 3.70975100  |
| H | 4.75438900  | 2.66192000  | 4.70283600  |
| H | 5.53249000  | 2.82791900  | 3.11226600  |
| H | 2.81782100  | 0.24596500  | 2.58859400  |
| H | 4.57756800  | 0.45897300  | 2.78041000  |
| H | 3.51437700  | 0.52724000  | 4.18869900  |
| C | 1.07566200  | 6.09509900  | 0.76886900  |
| C | 0.63554700  | 6.69882700  | -0.56159600 |
| C | 1.73211300  | 7.16856000  | 1.64609700  |
| H | 0.17073000  | 5.73800900  | 1.28814500  |
| H | 0.23946700  | 5.93065000  | -1.24321000 |
| H | -0.14217400 | 7.45857000  | -0.39463700 |
| H | 1.47735800  | 7.19263400  | -1.07164800 |
| H | 2.00655700  | 6.76951500  | 2.63237100  |
| H | 2.65026000  | 7.54130400  | 1.16654400  |
| H | 1.05141600  | 8.01957700  | 1.79779700  |
| C | -0.79646700 | -2.90214900 | -2.63950500 |
| C | -1.08718400 | -4.21798400 | -3.37730200 |
| C | 0.48232000  | -2.26475400 | -3.19631400 |
| H | -1.61624900 | -2.21241100 | -2.89904100 |
| H | -1.09287200 | -4.05534000 | -4.46573500 |
| H | -0.31146000 | -4.96629000 | -3.15324300 |
| H | -2.05843300 | -4.63920600 | -3.08189000 |
| H | 0.81028800  | -1.41021000 | -2.59436600 |
| H | 1.30963300  | -2.98052200 | -3.28304400 |
| H | 0.26819700  | -1.90132300 | -4.21357100 |

|   |             |             |             |
|---|-------------|-------------|-------------|
| C | 0.71991500  | -4.00909000 | 2.22480900  |
| C | 0.58852700  | -5.47006300 | 2.66888900  |
| C | 0.63317800  | -3.05401400 | 3.41879500  |
| H | 1.72081000  | -3.89303500 | 1.78711500  |
| H | 0.69326600  | -6.15255800 | 1.81302400  |
| H | 1.36131100  | -5.72232600 | 3.41045600  |
| H | -0.39516700 | -5.65352700 | 3.12784500  |
| H | 0.74079300  | -2.01068700 | 3.08892400  |
| H | -0.32923100 | -3.15507500 | 3.94399900  |
| H | 1.43387100  | -3.27153200 | 4.14162200  |
| C | -4.14419700 | -3.34019300 | 1.00470900  |
| C | -4.39535100 | -3.58982400 | 2.48849200  |
| C | -4.92070500 | -4.35455900 | 0.15565100  |
| H | -4.53307700 | -2.34121400 | 0.75040100  |
| H | -3.82734400 | -2.89708500 | 3.12528700  |
| H | -5.46277700 | -3.45733900 | 2.71966000  |
| H | -4.11599700 | -4.61972100 | 2.76400400  |
| H | -4.82323500 | -4.14185000 | -0.91813700 |
| H | -4.54641200 | -5.37415200 | 0.33678000  |
| H | -5.99069400 | -4.33280100 | 0.41448000  |
| O | -1.20445900 | 2.08677800  | 0.88583200  |
| H | -1.20350600 | 3.06243900  | 0.98369100  |
| H | 0.07320200  | 1.32708600  | 1.22466700  |

**TS7***ISi-Ra-3S*

|   |             |             |             |
|---|-------------|-------------|-------------|
| S | 2.61097000  | -0.20643700 | 1.79465700  |
| O | 1.47133000  | -0.25544000 | 2.69267200  |
| O | 2.47368700  | 0.24208900  | 0.40917400  |
| O | 2.20227800  | -0.79114000 | -2.28802100 |
| N | 3.01348400  | -2.71353300 | 0.67978400  |
| N | 1.96127800  | -2.55603400 | -0.21519000 |
| C | 3.87662600  | 0.77147300  | 2.57377200  |
| C | 3.63151800  | 1.27747700  | 3.84543200  |
| H | 2.69813200  | 1.02621600  | 4.35133000  |
| C | 4.58834700  | 2.11441500  | 4.42119000  |
| H | 4.41618000  | 2.53109700  | 5.41417000  |
| C | 5.75810600  | 2.42018900  | 3.72640800  |
| H | 6.50154500  | 3.07618900  | 4.18167100  |
| C | 5.98660200  | 1.89586400  | 2.45070900  |
| H | 6.90226600  | 2.14276300  | 1.91170500  |
| C | 5.03663400  | 1.06812800  | 1.86067800  |
| H | 5.17701300  | 0.66113500  | 0.85834200  |
| C | 3.37357800  | -1.81299400 | 1.66903500  |
| C | 4.42140800  | -2.30305200 | 2.39907900  |
| H | 4.92291900  | -1.78767900 | 3.21362400  |
| C | 4.73398600  | -3.58640800 | 1.84904600  |
| C | 3.83926500  | -3.81641800 | 0.77177400  |
| C | 3.89182500  | -5.00491000 | 0.02072900  |
| H | 3.21113000  | -5.19904200 | -0.80589800 |
| C | 4.85453900  | -5.93831200 | 0.36347300  |
| H | 4.91549100  | -6.86638000 | -0.20633200 |
| C | 5.75510900  | -5.72071400 | 1.42842100  |
| H | 6.49676800  | -6.48400500 | 1.66527300  |
| C | 5.70216600  | -4.55625800 | 2.17006100  |
| H | 6.39422800  | -4.38416600 | 2.99553100  |
| C | 0.89061700  | -3.58904300 | -0.14128700 |
| H | 1.37935100  | -4.57028900 | -0.06497100 |
| C | 0.19371000  | -3.44759400 | -1.47804100 |
| C | -1.07457700 | -3.97588800 | -1.70737500 |
| H | -1.59521600 | -4.48467800 | -0.89425500 |
| C | -1.67717200 | -3.80401600 | -2.95073000 |
| H | -2.67449300 | -4.20991000 | -3.12377200 |
| C | -1.02877700 | -3.08754600 | -3.95882300 |
| H | -1.51677200 | -2.93680600 | -4.92262700 |
| C | 0.22120600  | -2.52703300 | -3.71965500 |
| H | 0.71250300  | -1.91724500 | -4.48034400 |
| C | 0.83651200  | -2.72277200 | -2.48035300 |



|   |             |             |             |
|---|-------------|-------------|-------------|
| C | 2.15548200  | -2.05433600 | -2.21029900 |
| C | 3.43724200  | -2.77134900 | -2.52419200 |
| H | 3.70970200  | -2.50531000 | -3.55707900 |
| H | 3.32709100  | -3.85754700 | -2.45554300 |
| H | 4.23946300  | -2.42448100 | -1.85852600 |
| C | -2.86061900 | 0.71700200  | 0.40297900  |
| C | -2.82966400 | 2.01791900  | 0.87904200  |
| C | -3.53824900 | 2.32429700  | 2.09266400  |
| C | -4.39801600 | 1.34089100  | 2.65624200  |
| C | -4.44964900 | 0.05041900  | 2.07141100  |
| C | -3.64471100 | -0.30437800 | 1.01565100  |
| H | -2.70893300 | 4.31324900  | 2.38746300  |
| C | -3.40175400 | 3.56651900  | 2.77438900  |
| C | -5.14210400 | 1.64519300  | 3.82914700  |
| H | -5.10455500 | -0.70374400 | 2.51225700  |
| C | -5.01245200 | 2.86424700  | 4.44580700  |
| C | -4.11789800 | 3.82670300  | 3.91800700  |
| H | -5.80480100 | 0.87962500  | 4.23822300  |
| H | -5.58031600 | 3.08748200  | 5.35004800  |
| H | -3.98954500 | 4.78232500  | 4.42832300  |
| C | -2.05654500 | 3.06160600  | 0.15664800  |
| C | -2.63571700 | 4.33036400  | -0.20082600 |
| C | -0.74599200 | 2.81593100  | -0.20094300 |
| C | -4.02180500 | 4.61524900  | -0.05112300 |
| C | -1.79661800 | 5.34465900  | -0.74556100 |
| C | 0.07241600  | 3.78564300  | -0.85578400 |
| C | -4.53000300 | 5.85021100  | -0.37695000 |
| H | -4.68774600 | 3.83621700  | 0.31918100  |
| C | -2.34752300 | 6.61748200  | -1.05649600 |
| C | -0.44016100 | 5.04267800  | -1.04657700 |
| C | -3.68369900 | 6.87165400  | -0.87028900 |
| H | -5.59767600 | 6.04151600  | -0.26040200 |
| H | -1.68583400 | 7.38438300  | -1.46454500 |
| H | 0.18075700  | 5.81087800  | -1.51299000 |
| H | -4.09817700 | 7.84967200  | -1.11850700 |
| O | -0.16649500 | 1.61825200  | 0.13743500  |
| O | -2.15181500 | 0.39086300  | -0.73684200 |
| P | -0.53194700 | 0.22393900  | -0.61289000 |
| O | 0.01563200  | 0.21105300  | -2.03213200 |
| C | 1.38274000  | 3.33356700  | -1.40557100 |
| C | 2.53419400  | 3.24558000  | -0.59587800 |
| C | 1.40583900  | 2.87274900  | -2.74184400 |
| C | 3.67410600  | 2.63137600  | -1.12087600 |
| C | 2.56834600  | 2.24292700  | -3.19716700 |
| C | 3.69417000  | 2.07468700  | -2.39738400 |
| H | 4.55560900  | 2.55087300  | -0.47971600 |
| H | 2.57827000  | 1.83291500  | -4.21191200 |
| C | -3.65228500 | -1.72699400 | 0.55988800  |
| C | -3.20820700 | -2.74980000 | 1.42728500  |
| C | -4.25771100 | -2.05924800 | -0.67526700 |
| C | -3.44801700 | -4.08079400 | 1.05110400  |
| C | -4.48178700 | -3.40105100 | -0.98787400 |
| C | -4.10808500 | -4.43217900 | -0.12256600 |
| H | -3.11008200 | -4.87542500 | 1.72395700  |
| H | -4.99080200 | -3.64262200 | -1.92596800 |
| C | 2.65547100  | 3.84259700  | 0.80516800  |
| C | 1.60406100  | 3.42777300  | 1.84128100  |
| C | 2.76242100  | 5.37093000  | 0.73070700  |
| H | 3.62178700  | 3.47306500  | 1.18779600  |
| H | 1.40269600  | 2.34914600  | 1.81827100  |
| H | 1.96790800  | 3.69733200  | 2.84520500  |
| H | 0.64882500  | 3.95122800  | 1.69234700  |
| H | 3.56479100  | 5.68101700  | 0.04603200  |
| H | 1.81782400  | 5.80701800  | 0.37295400  |
| H | 2.97130400  | 5.79138500  | 1.72644900  |
| C | 0.30975300  | 3.06860000  | -3.79737200 |

|                                |              |             |             |
|--------------------------------|--------------|-------------|-------------|
| C                              | 0.47252600   | 4.44993800  | -4.44887300 |
| C                              | -1.16406100  | 2.82178200  | -3.45055700 |
| H                              | 0.55447700   | 2.32521100  | -4.57250400 |
| H                              | 1.50479200   | 4.61374100  | -4.78989100 |
| H                              | -0.20173700  | 4.54839800  | -5.31325900 |
| H                              | 0.21901200   | 5.24729800  | -3.73462000 |
| H                              | -1.30549400  | 1.87551900  | -2.91747200 |
| H                              | -1.61026900  | 3.63563500  | -2.86471800 |
| H                              | -1.72866300  | 2.76128400  | -4.39404200 |
| C                              | 4.88347400   | 1.28973000  | -2.91521000 |
| C                              | 5.48868100   | 0.39035100  | -1.83542800 |
| C                              | 5.94205200   | 2.21300300  | -3.52596300 |
| H                              | 4.49584300   | 0.63517900  | -3.71313900 |
| H                              | 4.68982900   | -0.13942900 | -1.29259100 |
| H                              | 6.17942300   | -0.34386400 | -2.27710900 |
| H                              | 6.07105400   | 0.98486000  | -1.11285000 |
| H                              | 5.51770800   | 2.81580400  | -4.34120100 |
| H                              | 6.32783600   | 2.90639800  | -2.76234400 |
| H                              | 6.79017500   | 1.63558800  | -3.92493000 |
| C                              | -2.51906700  | -2.59484000 | 2.79168500  |
| C                              | -3.50526000  | -2.87855800 | 3.93473600  |
| C                              | -1.71392800  | -1.32752300 | 3.10055400  |
| H                              | -1.78916900  | -3.42123100 | 2.79685100  |
| H                              | -2.96490300  | -2.93708500 | 4.89128300  |
| H                              | -4.24558900  | -2.06926500 | 4.02215100  |
| H                              | -4.04786900  | -3.82292500 | 3.78485800  |
| H                              | -1.09815300  | -0.98582700 | 2.25982200  |
| H                              | -2.35195700  | -0.49291800 | 3.42048900  |
| H                              | -1.02622600  | -1.54825800 | 3.93038200  |
| C                              | -4.73958300  | -0.99926200 | -1.65619000 |
| C                              | -6.25245300  | -1.08997700 | -1.87972400 |
| C                              | -3.96970900  | -1.08180200 | -2.97699600 |
| H                              | -4.53840200  | -0.01041800 | -1.22605800 |
| H                              | -6.79736200  | -1.01189300 | -0.92771600 |
| H                              | -6.59163300  | -0.27756300 | -2.53940300 |
| H                              | -6.53333000  | -2.04343200 | -2.35288300 |
| H                              | -2.88823100  | -0.98895400 | -2.80423800 |
| H                              | -4.16061300  | -2.04136100 | -3.48529800 |
| H                              | -4.28325500  | -0.27362100 | -3.65498400 |
| C                              | -4.46140700  | -5.88149400 | -0.40807000 |
| C                              | -4.01625600  | -6.35243600 | -1.79355800 |
| C                              | -5.96600300  | -6.10420700 | -0.21697300 |
| H                              | -3.93249800  | -6.49327100 | 0.34101300  |
| H                              | -2.93134300  | -6.23902700 | -1.93081500 |
| H                              | -4.26774400  | -7.41351600 | -1.93800300 |
| H                              | -4.52495900  | -5.78483100 | -2.58877500 |
| H                              | -6.28446800  | -5.79989400 | 0.78978700  |
| H                              | -6.53835500  | -5.50825500 | -0.94477500 |
| H                              | -6.22826700  | -7.16305000 | -0.36150800 |
| O                              | 0.07453100   | -3.47671100 | 0.95777800  |
| H                              | -0.38872400  | -2.61640400 | 0.88647500  |
| H                              | 1.18068700   | -0.27391400 | -2.18074200 |
| O                              | -0.16400800  | -0.92269200 | 0.27235600  |
| H                              | 1.47579100   | -1.66316000 | -0.00399500 |
| <b>TS8<sub>ISI-Sa-3S</sub></b> |              |             |             |
| S                              | -5.95421100  | 1.00691600  | 0.32260500  |
| O                              | -5.75942800  | 1.22453300  | -1.10881100 |
| O                              | -5.70451300  | 2.10508000  | 1.24572500  |
| O                              | -1.53482300  | -1.41711100 | -1.97722700 |
| N                              | -3.59837500  | -0.44242500 | 0.81414000  |
| N                              | -2.72805200  | 0.18993700  | -0.07105600 |
| C                              | -7.61091500  | 0.41956000  | 0.57744900  |
| C                              | -8.22860800  | -0.31854000 | -0.42921000 |
| H                              | -7.69563900  | -0.52092600 | -1.35948600 |
| C                              | -9.52861100  | -0.77072200 | -0.21542800 |
| H                              | -10.03574100 | -1.35071900 | -0.98717100 |

|   |              |             |             |
|---|--------------|-------------|-------------|
| C | -10.18297800 | -0.47386400 | 0.98197000  |
| H | -11.20185400 | -0.82935800 | 1.14251400  |
| C | -9.55022000  | 0.28011000  | 1.97149900  |
| H | -10.07330400 | 0.51667500  | 2.89865500  |
| C | -8.24887200  | 0.73801000  | 1.77324600  |
| H | -7.72475800  | 1.33794800  | 2.51882300  |
| C | -4.98304900  | -0.39226800 | 0.84914300  |
| C | -5.47139400  | -1.45045600 | 1.57819600  |
| H | -6.51446100  | -1.62301900 | 1.82622000  |
| C | -4.34441900  | -2.22952100 | 1.98694200  |
| C | -3.19201000  | -1.57699100 | 1.49156000  |
| C | -1.89550000  | -2.07751900 | 1.70088900  |
| H | -1.00436500  | -1.57985000 | 1.31680200  |
| C | -1.78860800  | -3.23813900 | 2.44546200  |
| H | -0.79474700  | -3.64378300 | 2.63823900  |
| C | -2.92591500  | -3.90579800 | 2.95610700  |
| H | -2.79097500  | -4.81956200 | 3.53655300  |
| C | -4.19897900  | -3.41610200 | 2.73268600  |
| H | -5.07685400  | -3.93064300 | 3.12571100  |
| C | -2.69684100  | 1.66767900  | -0.14895800 |
| H | -3.72013200  | 2.05645800  | -0.12226900 |
| C | -2.08957800  | 1.91900400  | -1.51618600 |
| C | -1.58765400  | 3.17288200  | -1.85909300 |
| H | -1.61887200  | 3.97441200  | -1.11920900 |
| C | -1.02180300  | 3.37453600  | -3.11491600 |
| H | -0.62407300  | 4.35665900  | -3.37440600 |
| C | -0.93654700  | 2.32081000  | -4.02666700 |
| H | -0.47626100  | 2.47765300  | -5.00316900 |
| C | -1.40542000  | 1.05931600  | -3.67507300 |
| H | -1.30091700  | 0.21764500  | -4.36286900 |
| C | -1.99573200  | 0.86243900  | -2.42297300 |
| C | -2.42403600  | -0.52913600 | -2.03847800 |
| C | -3.83327700  | -0.97656200 | -2.28890800 |
| H | -4.08974700  | -1.78536300 | -1.58884300 |
| H | -3.86391900  | -1.38867700 | -3.31017700 |
| H | -4.54425700  | -0.14928100 | -2.20184200 |
| C | 3.09156000   | 1.32020600  | 0.39796100  |
| C | 4.03701800   | 0.42153500  | 0.85804400  |
| C | 4.83700300   | 0.79495000  | 1.99368200  |
| C | 4.75179600   | 2.12735800  | 2.48808500  |
| C | 3.81867600   | 3.02661200  | 1.91026500  |
| C | 2.94183700   | 2.63320100  | 0.92837000  |
| H | 5.74307000   | -1.15417800 | 2.32996300  |
| C | 5.69859500   | -0.11805800 | 2.66451200  |
| C | 5.56635200   | 2.52246700  | 3.58455300  |
| H | 3.76127700   | 4.04782400  | 2.29244400  |
| C | 6.40790500   | 1.62555300  | 4.19329900  |
| C | 6.46005800   | 0.28713300  | 3.73437600  |
| H | 5.49437600   | 3.55180000  | 3.94177000  |
| H | 7.02330800   | 1.93472500  | 5.03915400  |
| H | 7.10610100   | -0.43244500 | 4.23909100  |
| C | 4.19295800   | -0.90866300 | 0.20972500  |
| C | 5.47082700   | -1.39541200 | -0.23637900 |
| C | 3.09071600   | -1.71990500 | 0.03066500  |
| C | 6.63624000   | -0.57981700 | -0.26338100 |
| C | 5.57733400   | -2.74055500 | -0.69378200 |
| C | 3.17142600   | -3.05348200 | -0.46340800 |
| C | 7.84231600   | -1.08536500 | -0.68619400 |
| H | 6.56314800   | 0.46254400  | 0.04664900  |
| C | 6.84166100   | -3.23861200 | -1.11124500 |
| C | 4.41148200   | -3.55040900 | -0.77056100 |
| C | 7.95341300   | -2.43337800 | -1.10342600 |
| H | 8.72079600   | -0.43894100 | -0.70650700 |
| H | 6.90625500   | -4.27428400 | -1.45099300 |
| H | 4.50112600   | -4.57409200 | -1.14260000 |
| H | 8.91787200   | -2.82353800 | -1.43112600 |

|   |             |             |             |
|---|-------------|-------------|-------------|
| O | 1.84807700  | -1.25899900 | 0.40773800  |
| O | 2.28289600  | 0.96602500  | -0.66818100 |
| P | 1.08844500  | -0.09811900 | -0.43381600 |
| O | 0.73218600  | -0.59786000 | -1.83942900 |
| C | 1.90172200  | -3.81718600 | -0.64344000 |
| C | 1.32714500  | -4.49668000 | 0.45601700  |
| C | 1.23482900  | -3.78442200 | -1.88737600 |
| C | 0.07579700  | -5.09938100 | 0.29739100  |
| C | -0.03472000 | -4.37153700 | -1.96609200 |
| C | -0.64072400 | -5.02246900 | -0.89590800 |
| H | -0.35059400 | -5.63565300 | 1.14737000  |
| H | -0.57263200 | -4.31633100 | -2.91827800 |
| C | 1.90493000  | 3.59211300  | 0.44012200  |
| C | 0.86649900  | 4.02336400  | 1.29424200  |
| C | 2.05677300  | 4.17476600  | -0.84032700 |
| C | 0.04502900  | 5.07251300  | 0.85432100  |
| C | 1.22231800  | 5.22913900  | -1.21418000 |
| C | 0.22115500  | 5.71298200  | -0.36872400 |
| H | -0.76233400 | 5.40660500  | 1.51343300  |
| H | 1.37867800  | 5.70052400  | -2.18892300 |
| C | 2.01371100  | -4.71466800 | 1.80578300  |
| C | 2.51728900  | -3.47201400 | 2.55155800  |
| C | 3.12091600  | -5.77068800 | 1.70101800  |
| H | 1.22862800  | -5.15274600 | 2.44381700  |
| H | 1.80518100  | -2.63722600 | 2.49109000  |
| H | 2.66477500  | -3.72454200 | 3.61226500  |
| H | 3.48544900  | -3.12368900 | 2.16594300  |
| H | 2.74677300  | -6.69241400 | 1.23329400  |
| H | 3.96199000  | -5.39548700 | 1.10042200  |
| H | 3.50772200  | -6.02007500 | 2.70085300  |
| C | 1.77113700  | -3.27376900 | -3.23370000 |
| C | 2.14777400  | -4.49315300 | -4.09197000 |
| C | 2.91483300  | -2.25710600 | -3.31369700 |
| H | 0.89956200  | -2.79103500 | -3.70620500 |
| H | 1.31603000  | -5.20476500 | -4.18528800 |
| H | 2.45156200  | -4.17623900 | -5.10097900 |
| H | 2.99557300  | -5.02654900 | -3.63375300 |
| H | 2.77951500  | -1.39991100 | -2.64706300 |
| H | 3.89218800  | -2.71411600 | -3.11258100 |
| H | 2.94499900  | -1.86864600 | -4.34301700 |
| C | -2.04415100 | -5.58122300 | -1.05517200 |
| C | -3.06356600 | -4.43570100 | -1.04030600 |
| C | -2.41044400 | -6.63847100 | -0.01753700 |
| H | -2.08244800 | -6.05265000 | -2.05212000 |
| H | -2.78043600 | -3.65410600 | -1.75843000 |
| H | -4.07279100 | -4.80378300 | -1.28220600 |
| H | -3.09463500 | -3.97276000 | -0.04053700 |
| H | -1.66716200 | -7.44798600 | 0.02231800  |
| H | -2.48944700 | -6.18952500 | 0.98492200  |
| H | -3.38887400 | -7.07996800 | -0.25554800 |
| C | 0.54208600  | 3.51311900  | 2.70453300  |
| C | 1.06763500  | 4.48765800  | 3.76841800  |
| C | 0.90782300  | 2.07461900  | 3.08447600  |
| H | -0.55855900 | 3.56301800  | 2.74600400  |
| H | 0.69233800  | 4.20172500  | 4.76226100  |
| H | 2.16706900  | 4.46538100  | 3.80868300  |
| H | 0.75438800  | 5.52126500  | 3.56419900  |
| H | 0.67480700  | 1.35825500  | 2.28711000  |
| H | 1.96735100  | 1.96450500  | 3.35092600  |
| H | 0.31863500  | 1.79122000  | 3.96944700  |
| C | 3.14750800  | 3.73830400  | -1.80897900 |
| C | 4.12902900  | 4.88040200  | -2.09108600 |
| C | 2.54879600  | 3.17825200  | -3.10193000 |
| H | 3.72425500  | 2.92897300  | -1.34337200 |
| H | 4.57126800  | 5.26001800  | -1.15850300 |
| H | 4.94373100  | 4.53463100  | -2.74450600 |

|   |             |             |             |
|---|-------------|-------------|-------------|
| H | 3.62979700  | 5.72209800  | -2.59506500 |
| H | 1.87101900  | 2.33987700  | -2.88800800 |
| H | 1.98102800  | 3.95237300  | -3.64319300 |
| H | 3.34670200  | 2.81908900  | -3.76922600 |
| C | -0.60305200 | 6.93893600  | -0.72209200 |
| C | -1.19987300 | 6.89379700  | -2.12936200 |
| C | 0.24244900  | 8.20421100  | -0.53293300 |
| H | -1.43806200 | 6.98113000  | -0.00385200 |
| H | -1.85254600 | 6.02026500  | -2.26695800 |
| H | -1.80021900 | 7.79579600  | -2.31791000 |
| H | -0.41130600 | 6.86070500  | -2.89754300 |
| H | 0.64326200  | 8.26181800  | 0.48871900  |
| H | 1.09560800  | 8.20275100  | -1.22917400 |
| H | -0.35475400 | 9.10801800  | -0.72551900 |
| O | -2.01421000 | 2.27606000  | 0.88618500  |
| H | -1.07815100 | 2.01502600  | 0.81409100  |
| H | -0.33106500 | -0.99759600 | -1.93376900 |
| O | -0.03469700 | 0.40243200  | 0.41142100  |
| H | -1.77167500 | -0.06444500 | 0.22213000  |

**TS9<sub>IrRe-Ra-3S</sub>**

|   |             |             |             |
|---|-------------|-------------|-------------|
| S | -5.23118900 | -1.99805900 | 1.68287600  |
| O | -4.42270700 | -1.24441700 | 2.64867300  |
| O | -5.63317500 | -3.36040300 | 1.99501600  |
| O | -0.30303200 | -2.96982600 | -1.43824800 |
| N | -3.08580100 | -1.63649000 | -0.21041200 |
| N | -1.89128400 | -1.98306900 | 0.43687300  |
| C | -6.71538100 | -1.05269500 | 1.40983700  |
| C | -6.66784000 | 0.32954900  | 1.57499000  |
| H | -5.73531700 | 0.80984400  | 1.87673400  |
| C | -7.83500500 | 1.06266500  | 1.37389400  |
| H | -7.82141600 | 2.14624900  | 1.49941800  |
| C | -9.01954300 | 0.40925700  | 1.02689500  |
| H | -9.93075600 | 0.98836300  | 0.87106000  |
| C | -9.05156200 | -0.97978600 | 0.89638500  |
| H | -9.98546900 | -1.48491800 | 0.64737400  |
| C | -7.89192100 | -1.72752300 | 1.09629900  |
| H | -7.88702700 | -2.81637200 | 1.02436300  |
| C | -4.41967700 | -1.93974800 | 0.08700100  |
| C | -5.17244800 | -1.85829300 | -1.05621300 |
| H | -6.25472300 | -1.94514000 | -1.10325500 |
| C | -4.30154100 | -1.49937700 | -2.12895500 |
| C | -3.01964800 | -1.32620700 | -1.57080000 |
| C | -1.94240500 | -0.85550600 | -2.33592300 |
| H | -0.95885400 | -0.67276400 | -1.91342200 |
| C | -2.17608100 | -0.61715800 | -3.67675200 |
| H | -1.35558600 | -0.24272300 | -4.28986700 |
| C | -3.44270800 | -0.83425800 | -4.26422000 |
| H | -3.57646100 | -0.64658800 | -5.33051100 |
| C | -4.51186100 | -1.25824400 | -3.50109200 |
| H | -5.50189300 | -1.39507800 | -3.93906800 |
| C | -1.89471200 | -2.33077600 | 1.88538800  |
| H | -2.12282100 | -1.43085200 | 2.47545200  |
| C | -0.47926100 | -2.81543300 | 2.07241600  |
| C | 0.25473600  | -2.73729500 | 3.24636800  |
| H | -0.18301900 | -2.30144100 | 4.14624200  |
| C | 1.57255300  | -3.19719500 | 3.24215700  |
| H | 2.17080600  | -3.14097700 | 4.15279800  |
| C | 2.14553100  | -3.68469200 | 2.06732700  |
| H | 3.18732500  | -4.00446400 | 2.06249200  |
| C | 1.40904400  | -3.74140400 | 0.88175700  |
| H | 1.87584500  | -4.08011900 | -0.04546200 |
| C | 0.07864000  | -3.33480200 | 0.90742900  |
| C | -0.82522800 | -3.33447300 | -0.29644300 |
| C | -1.79990500 | -4.47020600 | -0.47462600 |
| H | -2.55250100 | -4.17603500 | -1.22163400 |
| H | -2.28170700 | -4.75560100 | 0.46389200  |

|   |             |             |             |
|---|-------------|-------------|-------------|
| H | -1.22970600 | -5.31738800 | -0.88196100 |
| C | 1.01592300  | 2.40286400  | 0.12172400  |
| C | 2.15434200  | 2.76710700  | 0.81653300  |
| C | 2.02682500  | 3.71733600  | 1.88631900  |
| C | 0.77228000  | 4.35966600  | 2.08964900  |
| C | -0.33943200 | 3.99619100  | 1.28344100  |
| C | -0.26391200 | 2.99098500  | 0.35058900  |
| H | 4.05087800  | 3.51472100  | 2.65024900  |
| C | 3.09675400  | 4.02827600  | 2.77059800  |
| C | 0.64169800  | 5.32425900  | 3.12574100  |
| H | -1.29608600 | 4.49815100  | 1.44691600  |
| C | 1.69961500  | 5.62055200  | 3.94917800  |
| C | 2.93593300  | 4.95314800  | 3.77466400  |
| H | -0.32431100 | 5.81525000  | 3.26128500  |
| H | 1.58732900  | 6.35734400  | 4.74571100  |
| H | 3.76727200  | 5.17046000  | 4.44676700  |
| C | 3.46255800  | 2.16664900  | 0.43490700  |
| C | 4.59812300  | 2.98906100  | 0.11152400  |
| C | 3.59095000  | 0.79401500  | 0.32126000  |
| C | 4.52497100  | 4.40872100  | 0.03016300  |
| C | 5.84851600  | 2.36602600  | -0.16742200 |
| C | 4.81269000  | 0.16133500  | -0.05357600 |
| C | 5.63895900  | 5.15939000  | -0.26029300 |
| H | 3.56759500  | 4.90321700  | 0.19121000  |
| C | 6.98678300  | 3.16962800  | -0.44980400 |
| C | 5.92233600  | 0.94888800  | -0.22955800 |
| C | 6.89029900  | 4.53807600  | -0.48835900 |
| H | 5.55506900  | 6.24526400  | -0.32309100 |
| H | 7.93748400  | 2.67161800  | -0.65127600 |
| H | 6.87454000  | 0.48102000  | -0.49015000 |
| H | 7.76772700  | 5.14642400  | -0.71163900 |
| O | 2.52983900  | -0.02163000 | 0.62434000  |
| O | 1.11889100  | 1.43042100  | -0.85033200 |
| P | 1.17268600  | -0.09979300 | -0.27101600 |
| O | 1.31740200  | -1.04901800 | -1.42847100 |
| C | 4.84094300  | -1.30383400 | -0.34761500 |
| C | 5.07337500  | -2.25464400 | 0.67026100  |
| C | 4.65891300  | -1.72345000 | -1.68505600 |
| C | 5.11605900  | -3.61076100 | 0.32732100  |
| C | 4.67709100  | -3.09785400 | -1.95685300 |
| C | 4.90894600  | -4.05915700 | -0.97711400 |
| H | 5.33240600  | -4.33556300 | 1.11771900  |
| H | 4.53177800  | -3.42508800 | -2.99092700 |
| C | -1.47585400 | 2.57927000  | -0.42228300 |
| C | -2.60393300 | 2.01227800  | 0.21785500  |
| C | -1.52988300 | 2.85847900  | -1.80817700 |
| C | -3.74728300 | 1.77652300  | -0.55667700 |
| C | -2.72087400 | 2.65309000  | -2.51165400 |
| C | -3.85938900 | 2.13620300  | -1.89783600 |
| H | -4.61488800 | 1.31619800  | -0.06996500 |
| H | -2.75122600 | 2.91994100  | -3.56951300 |
| C | 5.40978100  | -1.91536300 | 2.12238000  |
| C | 4.50889700  | -0.90301100 | 2.83818800  |
| C | 6.88513200  | -1.51528700 | 2.25437000  |
| H | 5.29420000  | -2.86858800 | 2.66549700  |
| H | 3.44675600  | -1.06763600 | 2.61463500  |
| H | 4.65870100  | -0.99693200 | 3.92472300  |
| H | 4.75916000  | 0.13222100  | 2.56751100  |
| H | 7.54524700  | -2.27364700 | 1.80971400  |
| H | 7.07094600  | -0.55662400 | 1.74837000  |
| H | 7.15658900  | -1.39451500 | 3.31409900  |
| C | 4.59648900  | -0.82540200 | -2.92735800 |
| C | 6.02084500  | -0.58669700 | -3.45155300 |
| C | 3.82358900  | 0.49636800  | -2.89206900 |
| H | 4.08267500  | -1.44625400 | -3.67810100 |
| H | 6.57230200  | -1.53073500 | -3.56685600 |

|   |             |             |             |
|---|-------------|-------------|-------------|
| H | 5.98793100  | -0.07965100 | -4.42763200 |
| H | 6.58457300  | 0.05690600  | -2.75988100 |
| H | 2.81909600  | 0.36742000  | -2.47634600 |
| H | 4.34710500  | 1.28876900  | -2.34046200 |
| H | 3.70816800  | 0.84998100  | -3.92836900 |
| C | 4.91579600  | -5.53566200 | -1.33197500 |
| C | 3.55509000  | -6.17456900 | -1.03361700 |
| C | 6.04130000  | -6.30897900 | -0.64335200 |
| H | 5.08188200  | -5.59791100 | -2.41983100 |
| H | 2.75034800  | -5.66888400 | -1.58724700 |
| H | 3.54985000  | -7.23820000 | -1.31573600 |
| H | 3.32581500  | -6.10756500 | 0.04222000  |
| H | 7.01723600  | -5.83404600 | -0.81667600 |
| H | 5.87976200  | -6.36817300 | 0.44360700  |
| H | 6.08492500  | -7.34023400 | -1.02279500 |
| C | -2.80346300 | 1.66653300  | 1.70219000  |
| C | -3.77293800 | 2.67245000  | 2.34501700  |
| C | -1.61262300 | 1.45797000  | 2.64308600  |
| H | -3.33218400 | 0.69761600  | 1.67082300  |
| H | -4.06774700 | 2.32817600  | 3.34834200  |
| H | -3.28918000 | 3.65552000  | 2.45474200  |
| H | -4.68079900 | 2.82082700  | 1.74122200  |
| H | -0.79596800 | 0.90038700  | 2.17112000  |
| H | -1.21030100 | 2.40627900  | 3.02400700  |
| H | -1.97207100 | 0.89071900  | 3.51758000  |
| C | -0.35563700 | 3.44819100  | -2.57892600 |
| C | -0.69231100 | 4.83822400  | -3.12935300 |
| C | 0.10207400  | 2.50107000  | -3.69236600 |
| H | 0.49079800  | 3.57589400  | -1.89368900 |
| H | -0.99939900 | 5.51813500  | -2.32143200 |
| H | 0.18360000  | 5.27362800  | -3.63292500 |
| H | -1.51181400 | 4.79261200  | -3.86272000 |
| H | 0.36336000  | 1.51661800  | -3.27865100 |
| H | -0.68778000 | 2.36925000  | -4.44919200 |
| H | 0.99022300  | 2.90588100  | -4.20050800 |
| C | -5.20940300 | 2.02030900  | -2.58857800 |
| C | -5.16201900 | 2.30907200  | -4.08535600 |
| C | -6.22779800 | 2.94572600  | -1.90836000 |
| H | -5.55483100 | 0.98237400  | -2.44549300 |
| H | -4.42783400 | 1.67332500  | -4.59795600 |
| H | -6.14767100 | 2.13147500  | -4.53957200 |
| H | -4.89500400 | 3.36102200  | -4.27224900 |
| H | -6.32821800 | 2.71657900  | -0.83784100 |
| H | -5.90941900 | 3.99549800  | -2.00106900 |
| H | -7.21956800 | 2.84279300  | -2.37423800 |
| O | -2.80773400 | -3.35089400 | 2.12118500  |
| H | -3.36111600 | -3.12098600 | 2.87846100  |
| H | 0.43191000  | -2.24695000 | -1.39214000 |
| O | 0.01061500  | -0.29925400 | 0.66191800  |
| H | -1.19244000 | -1.15637600 | 0.38674500  |

**TS10***1Re-Sa-3S*

|   |             |             |             |
|---|-------------|-------------|-------------|
| S | -3.16783200 | -0.27614100 | 1.36957800  |
| O | -2.37286800 | 0.52473400  | 2.28556900  |
| O | -2.53109000 | -0.88674500 | 0.18797100  |
| O | -1.56594400 | 2.89468900  | 0.74315100  |
| N | -4.50268400 | 1.62267000  | -0.07225600 |
| N | -3.37161700 | 1.74994500  | -0.80420500 |
| C | -3.90434900 | -1.59390300 | 2.31081800  |
| C | -3.82206700 | -1.53383300 | 3.69758800  |
| H | -3.32725500 | -0.68296800 | 4.16791900  |
| C | -4.35864900 | -2.58591800 | 4.43951400  |
| H | -4.29999700 | -2.56739200 | 5.52834100  |
| C | -4.96300700 | -3.66138900 | 3.78856400  |
| H | -5.38046800 | -4.48247600 | 4.37325800  |
| C | -5.03506300 | -3.70014500 | 2.39349200  |
| H | -5.50306500 | -4.55035700 | 1.89504500  |

|   |             |             |             |
|---|-------------|-------------|-------------|
| C | -4.49718300 | -2.65915700 | 1.64096900  |
| H | -4.50511500 | -2.66601800 | 0.54933200  |
| C | -4.59964300 | 0.65616600  | 0.90334700  |
| C | -5.81668100 | 0.69932000  | 1.53168500  |
| H | -6.14999000 | 0.06145500  | 2.34559500  |
| C | -6.53628800 | 1.76891500  | 0.90489300  |
| C | -5.69310300 | 2.33000800  | -0.08878400 |
| C | -6.10213200 | 3.41173100  | -0.88553300 |
| H | -5.44718300 | 3.79938100  | -1.66240500 |
| C | -7.36630000 | 3.92277700  | -0.65654900 |
| H | -7.71438400 | 4.76554900  | -1.25585100 |
| C | -8.22340500 | 3.37867700  | 0.32862800  |
| H | -9.21386900 | 3.81246100  | 0.47225000  |
| C | -7.82335800 | 2.30842400  | 1.10437000  |
| H | -8.48402300 | 1.88648000  | 1.86338300  |
| C | -3.36237200 | 1.44162100  | -2.18508500 |
| H | -3.68169500 | 0.39405900  | -2.36059600 |
| C | -1.90941700 | 1.65075600  | -2.54782900 |
| C | -1.25793700 | 1.10924300  | -3.64884700 |
| H | -1.79738000 | 0.46239900  | -4.34570400 |
| C | 0.10182200  | 1.37197500  | -3.84088900 |
| H | 0.62280700  | 0.94323800  | -4.69836900 |
| C | 0.79945300  | 2.14902100  | -2.91901200 |
| H | 1.86740700  | 2.33536700  | -3.04799300 |
| C | 0.14446900  | 2.68571600  | -1.80702000 |
| H | 0.69191200  | 3.26125500  | -1.06510600 |
| C | -1.21373700 | 2.45325200  | -1.63694800 |
| C | -2.02517700 | 3.01192800  | -0.49595900 |
| C | -2.64450400 | 4.36427500  | -0.72474500 |
| H | -3.41908400 | 4.54320900  | 0.03386600  |
| H | -3.07388700 | 4.42340700  | -1.73154400 |
| H | -1.85600100 | 5.12531100  | -0.60777800 |
| C | 2.12651000  | -2.28321700 | 0.14201400  |
| C | 3.45700500  | -1.91722600 | 0.19219600  |
| C | 4.43086100  | -2.76633800 | -0.43940500 |
| C | 4.01025600  | -4.02650600 | -0.95242900 |
| C | 2.62719900  | -4.34267000 | -0.96788700 |
| C | 1.67509300  | -3.45792400 | -0.52177100 |
| H | 6.13123800  | -1.42053800 | -0.25425600 |
| C | 5.79824600  | -2.40102000 | -0.59297800 |
| C | 4.96819100  | -4.90598500 | -1.52762500 |
| H | 2.30400700  | -5.28197100 | -1.42095900 |
| C | 6.28662900  | -4.53910500 | -1.62848300 |
| C | 6.69837900  | -3.26411300 | -1.17046100 |
| H | 4.62687200  | -5.87234700 | -1.90466100 |
| H | 7.01398700  | -5.21659000 | -2.07764200 |
| H | 7.73989700  | -2.95997100 | -1.28290000 |
| C | 3.84130400  | -0.63026500 | 0.82532600  |
| C | 4.87537700  | -0.55628900 | 1.81996600  |
| C | 3.20292700  | 0.53564100  | 0.44224500  |
| C | 5.45754400  | -1.71379700 | 2.40866700  |
| C | 5.32057000  | 0.72137100  | 2.25879400  |
| C | 3.61408600  | 1.82083700  | 0.90022300  |
| C | 6.44979300  | -1.59996300 | 3.35215800  |
| H | 5.09925900  | -2.69942200 | 2.11184700  |
| C | 6.35967200  | 0.80820700  | 3.22552000  |
| C | 4.68631100  | 1.88597400  | 1.75494800  |
| C | 6.91804300  | -0.32648100 | 3.75831500  |
| H | 6.87593300  | -2.49958500 | 3.79826300  |
| H | 6.69349600  | 1.79758600  | 3.54443100  |
| H | 5.02016600  | 2.86478400  | 2.10827500  |
| H | 7.71015700  | -0.25172100 | 4.50447900  |
| O | 2.14466700  | 0.45712600  | -0.46129900 |
| O | 1.18840900  | -1.49194500 | 0.78092200  |
| P | 0.73662800  | -0.07931700 | 0.13401800  |
| O | 0.09546900  | 0.81162300  | 1.11554100  |



|   |             |             |             |
|---|-------------|-------------|-------------|
| C | 2.91592400  | 3.07035200  | 0.47283200  |
| C | 3.31060800  | 3.69705200  | -0.73857400 |
| C | 1.91603000  | 3.64844200  | 1.28363600  |
| C | 2.66611300  | 4.87124900  | -1.12878800 |
| C | 1.26862200  | 4.80175600  | 0.80132600  |
| C | 1.62141900  | 5.42912000  | -0.38611000 |
| H | 2.98270900  | 5.35299500  | -2.05844700 |
| H | 0.44309700  | 5.21386700  | 1.38795300  |
| C | 0.23676300  | -3.70468300 | -0.83116800 |
| C | -0.19991400 | -3.59852000 | -2.17382500 |
| C | -0.65281800 | -4.11830200 | 0.17621000  |
| C | -1.50722700 | -3.99543100 | -2.46006500 |
| C | -1.95085300 | -4.51808300 | -0.17262700 |
| C | -2.38315800 | -4.50408900 | -1.49768500 |
| H | -1.84986600 | -3.93466600 | -3.49856800 |
| H | -2.61871600 | -4.87000900 | 0.61763700  |
| C | 4.48994800  | 3.26708000  | -1.61647600 |
| C | 4.66667900  | 1.77856700  | -1.94431700 |
| C | 5.79878400  | 3.84521400  | -1.06133400 |
| H | 4.30768000  | 3.77025300  | -2.57972900 |
| H | 3.71041600  | 1.27354500  | -2.14002900 |
| H | 5.29211500  | 1.68682700  | -2.84479800 |
| H | 5.18107500  | 1.23781000  | -1.13832500 |
| H | 5.72276800  | 4.93143700  | -0.91173100 |
| H | 6.04544600  | 3.38094800  | -0.09491000 |
| H | 6.63089100  | 3.64521100  | -1.75331800 |
| C | 1.45028600  | 3.22362300  | 2.68654400  |
| C | 1.76730100  | 4.35972200  | 3.67627000  |
| C | 1.92644200  | 1.91750100  | 3.32817000  |
| H | 0.35419000  | 3.14716400  | 2.59519100  |
| H | 1.34181100  | 5.32423700  | 3.37085700  |
| H | 1.37234500  | 4.11275700  | 4.67248300  |
| H | 2.85794400  | 4.48683600  | 3.76640800  |
| H | 1.80792400  | 1.04318200  | 2.68385600  |
| H | 2.97088300  | 1.98008900  | 3.66348200  |
| H | 1.30550300  | 1.74361300  | 4.21925900  |
| C | 0.89885000  | 6.67363200  | -0.86544200 |
| C | 0.34273400  | 6.49971200  | -2.28174000 |
| C | 1.80770900  | 7.90379700  | -0.77929400 |
| H | 0.04885800  | 6.83346100  | -0.18131200 |
| H | -0.28990300 | 5.60335300  | -2.35906600 |
| H | -0.25600700 | 7.37562500  | -2.57272400 |
| H | 1.15745600  | 6.39548900  | -3.01457900 |
| H | 2.17982800  | 8.05058600  | 0.24431300  |
| H | 2.67930000  | 7.78761900  | -1.44202100 |
| H | 1.26742400  | 8.81130100  | -1.08740300 |
| C | 0.62470200  | -3.15847500 | -3.39286200 |
| C | 1.19914100  | -4.37415900 | -4.13604600 |
| C | 1.70402500  | -2.08157100 | -3.23251300 |
| H | -0.13067100 | -2.71830200 | -4.06460100 |
| H | 1.59922700  | -4.06612700 | -5.11373600 |
| H | 2.02584900  | -4.82702600 | -3.56993300 |
| H | 0.43304100  | -5.14525900 | -4.30195600 |
| H | 1.33978400  | -1.21441200 | -2.66998200 |
| H | 2.61938900  | -2.45811600 | -2.75686300 |
| H | 1.98946900  | -1.73226300 | -4.23711900 |
| C | -0.21078200 | -4.21312300 | 1.62842700  |
| C | -0.20410800 | -5.66763100 | 2.10877600  |
| C | -1.06687900 | -3.32996700 | 2.53715500  |
| H | 0.82112500  | -3.84297300 | 1.69375400  |
| H | 0.44165000  | -6.29154900 | 1.47368400  |
| H | 0.16318400  | -5.73099600 | 3.14390100  |
| H | -1.21826800 | -6.09570500 | 2.08448900  |
| H | -1.08774200 | -2.29261800 | 2.17239800  |
| H | -2.10275700 | -3.70179400 | 2.58874200  |
| H | -0.66251100 | -3.32592600 | 3.56065400  |

|   |             |             |             |
|---|-------------|-------------|-------------|
| C | -3.70787500 | -5.08568300 | -1.96990000 |
| C | -4.70067200 | -5.39026700 | -0.85430400 |
| C | -3.44900300 | -6.35591600 | -2.79244500 |
| H | -4.16766200 | -4.33948200 | -2.64056500 |
| H | -4.94151700 | -4.49336900 | -0.27095500 |
| H | -5.63775800 | -5.78016900 | -1.27626400 |
| H | -4.30275100 | -6.15241200 | -0.16622900 |
| H | -2.77544300 | -6.16091900 | -3.63813600 |
| H | -2.97890500 | -7.12421600 | -2.15952800 |
| H | -4.39098100 | -6.76358900 | -3.18855300 |
| O | -4.20852400 | 2.31697800  | -2.92746600 |
| H | -4.13802700 | 2.09058100  | -3.86239900 |
| H | -1.06151600 | 2.05835400  | 0.89381400  |
| O | -0.10751400 | -0.44005400 | -1.14253700 |
| H | -1.05490400 | -0.56046000 | -0.88171200 |

**Int7<sub>IR-Ra-3S</sub>**

|   |             |             |             |
|---|-------------|-------------|-------------|
| S | -2.87173600 | -0.19650400 | 1.78649200  |
| O | -2.21375200 | 0.80599800  | 2.63931000  |
| O | -2.13663400 | -0.82552600 | 0.69885500  |
| O | -2.87276300 | 0.11383000  | -1.91252700 |
| N | -4.20667900 | 1.71404400  | 0.37152000  |
| N | -3.11265900 | 1.95307400  | -0.40722600 |
| C | -3.51443900 | -1.45478100 | 2.85512600  |
| C | -3.71838300 | -1.16795500 | 4.20270600  |
| H | -3.47691600 | -0.17626000 | 4.58758100  |
| C | -4.21557800 | -2.17947000 | 5.02172900  |
| H | -4.38172800 | -1.98620900 | 6.08202500  |
| C | -4.49003100 | -3.44082900 | 4.48803800  |
| H | -4.87606900 | -4.22821700 | 5.13715200  |
| C | -4.26660200 | -3.70726900 | 3.13613400  |
| H | -4.47145800 | -4.69883600 | 2.72961700  |
| C | -3.76956200 | -2.70617700 | 2.30437300  |
| H | -3.55750900 | -2.87435300 | 1.24731100  |
| C | -4.33921300 | 0.61603000  | 1.20416100  |
| C | -5.60351900 | 0.54432900  | 1.71916600  |
| H | -5.96651400 | -0.19303900 | 2.43001800  |
| C | -6.31868900 | 1.66846600  | 1.17939100  |
| C | -5.41800100 | 2.38554200  | 0.35700800  |
| C | -5.77934300 | 3.57775100  | -0.28555000 |
| H | -5.06486500 | 4.12855200  | -0.89735100 |
| C | -7.07447200 | 4.02971700  | -0.09944000 |
| H | -7.38887500 | 4.95746400  | -0.57939100 |
| C | -7.99626800 | 3.32060000  | 0.70236300  |
| H | -9.00773600 | 3.71034400  | 0.82133200  |
| C | -7.63157000 | 2.15036000  | 1.34290900  |
| H | -8.34198800 | 1.61042300  | 1.97051500  |
| C | -2.20198700 | 3.02111500  | -0.07043000 |
| H | -2.75318900 | 3.93891300  | 0.20933700  |
| C | -1.41380200 | 3.15678400  | -1.34415700 |
| C | -0.25934900 | 3.90484400  | -1.55266600 |
| H | 0.16644100  | 4.51835400  | -0.75512200 |
| C | 0.36380900  | 3.81208300  | -2.79665200 |
| H | 1.27307600  | 4.38472700  | -2.98307100 |
| C | -0.14681100 | 2.97309000  | -3.79335900 |
| H | 0.37017500  | 2.90270200  | -4.75183500 |
| C | -1.28066200 | 2.19856900  | -3.55858700 |
| H | -1.64983000 | 1.49586300  | -4.30797500 |
| C | -1.90707200 | 2.30467300  | -2.32228900 |
| C | -3.07435200 | 1.47710600  | -1.82150900 |
| C | -4.36610400 | 1.75187100  | -2.58321800 |
| H | -4.24330100 | 1.36292700  | -3.60246100 |
| H | -4.59155700 | 2.82298300  | -2.63572900 |
| H | -5.20417500 | 1.21760500  | -2.11228900 |
| C | 3.18601500  | 0.07237500  | 0.44895200  |
| C | 3.56123900  | -1.21514100 | 0.78867800  |
| C | 4.47833600  | -1.39054100 | 1.88163300  |

|   |             |             |             |
|---|-------------|-------------|-------------|
| C | 5.10769400  | -0.24460900 | 2.44468500  |
| C | 4.75477100  | 1.04758600  | 1.97356100  |
| C | 3.76191900  | 1.23436600  | 1.04366700  |
| H | 4.26987500  | -3.54749300 | 2.04245700  |
| C | 4.77393500  | -2.66570200 | 2.43847700  |
| C | 6.04641700  | -0.40980900 | 3.49950000  |
| H | 5.25073100  | 1.92017100  | 2.40394500  |
| C | 6.32815400  | -1.65622400 | 4.00118800  |
| C | 5.67204900  | -2.79330400 | 3.47102300  |
| H | 6.52709500  | 0.47933700  | 3.91286100  |
| H | 7.04397500  | -1.77238600 | 4.81604800  |
| H | 5.87650000  | -3.77966600 | 3.88972900  |
| C | 3.03222400  | -2.36863300 | 0.01174200  |
| C | 3.90928400  | -3.34793000 | -0.57490000 |
| C | 1.67536100  | -2.48438400 | -0.22279200 |
| C | 5.32805300  | -3.22960800 | -0.55224000 |
| C | 3.34225900  | -4.47466100 | -1.23819800 |
| C | 1.10219000  | -3.54792500 | -0.97850900 |
| C | 6.12849700  | -4.20028700 | -1.10522300 |
| H | 5.78319400  | -2.34985000 | -0.09897200 |
| C | 4.19644600  | -5.47093600 | -1.78553900 |
| C | 1.93496200  | -4.54743800 | -1.41441500 |
| C | 5.56101400  | -5.34502700 | -1.71462200 |
| H | 7.21270700  | -4.08212300 | -1.08060900 |
| H | 3.74043800  | -6.33127300 | -2.27967900 |
| H | 1.51453900  | -5.38867800 | -1.97022900 |
| H | 6.20828700  | -6.11147000 | -2.14287600 |
| O | 0.81227000  | -1.55850800 | 0.32092100  |
| O | 2.26227100  | 0.26685300  | -0.55601900 |
| P | 0.69344700  | -0.05753900 | -0.25986100 |
| O | -0.11748000 | 0.13917200  | -1.47664800 |
| C | -0.33350100 | -3.46059800 | -1.38140200 |
| C | -1.37148200 | -3.95247800 | -0.55950300 |
| C | -0.63505100 | -2.81537700 | -2.60206800 |
| C | -2.69329600 | -3.75296600 | -0.96448100 |
| C | -1.98140400 | -2.58799000 | -2.91398800 |
| C | -3.02418700 | -3.01936400 | -2.10290600 |
| H | -3.49572900 | -4.17051900 | -0.34920700 |
| H | -2.22124600 | -2.02845300 | -3.82205600 |
| C | 3.34043800  | 2.61035800  | 0.64269800  |
| C | 2.74138400  | 3.48981600  | 1.57136900  |
| C | 3.62489400  | 3.05824200  | -0.67088400 |
| C | 2.46861200  | 4.80188700  | 1.15362100  |
| C | 3.35141600  | 4.38157500  | -1.01916500 |
| C | 2.78080500  | 5.27989000  | -0.11522100 |
| H | 2.00479900  | 5.48635000  | 1.87137800  |
| H | 3.61630800  | 4.72351700  | -2.02381700 |
| C | -1.15864000 | -4.69815100 | 0.75577600  |
| C | -0.47949000 | -3.86310600 | 1.84823500  |
| C | -0.47771600 | -6.06055800 | 0.58633200  |
| H | -2.17781300 | -4.91052400 | 1.12050600  |
| H | -0.87343300 | -2.83762000 | 1.86683700  |
| H | -0.64747100 | -4.33105100 | 2.83074700  |
| H | 0.60768000  | -3.80050300 | 1.69577900  |
| H | -0.97344200 | -6.65858300 | -0.19219200 |
| H | 0.58093000  | -5.94811800 | 0.31604100  |
| H | -0.52054600 | -6.62253400 | 1.53183600  |
| C | 0.35540400  | -2.43825700 | -3.71179800 |
| C | 0.56816000  | -3.65868900 | -4.62055700 |
| C | 1.70618200  | -1.79298900 | -3.38419000 |
| H | -0.18761500 | -1.68747300 | -4.30710400 |
| H | -0.38958800 | -4.08797700 | -4.94734500 |
| H | 1.14885500  | -3.37743900 | -5.51216900 |
| H | 1.12913000  | -4.44212800 | -4.08893200 |
| H | 1.59877200  | -0.93400000 | -2.71398300 |
| H | 2.43294400  | -2.49758200 | -2.95880100 |

|   |             |             |             |
|---|-------------|-------------|-------------|
| H | 2.13826900  | -1.41857800 | -4.32531800 |
| C | -4.46550200 | -2.69531400 | -2.44254900 |
| C | -5.19602500 | -2.08335600 | -1.24430500 |
| C | -5.20265200 | -3.92474600 | -2.98114700 |
| H | -4.43374500 | -1.92940300 | -3.23353600 |
| H | -4.60572700 | -1.24961100 | -0.83850800 |
| H | -6.18697600 | -1.70642600 | -1.54104900 |
| H | -5.35733400 | -2.82983700 | -0.44898100 |
| H | -4.70069000 | -4.33187800 | -3.87037800 |
| H | -5.23392900 | -4.72016300 | -2.21980800 |
| H | -6.23971500 | -3.67406800 | -3.25118000 |
| C | 2.38619400  | 3.22056100  | 3.04109400  |
| C | 3.42322400  | 3.87764800  | 3.96459700  |
| C | 2.09452000  | 1.79406100  | 3.51832400  |
| H | 1.44556600  | 3.77855500  | 3.17953800  |
| H | 3.09866800  | 3.80497700  | 5.01345300  |
| H | 4.39534900  | 3.36874100  | 3.88016400  |
| H | 3.57611600  | 4.93841200  | 3.72071300  |
| H | 1.51065700  | 1.21915300  | 2.79148200  |
| H | 3.00890000  | 1.23350300  | 3.75077700  |
| H | 1.50964800  | 1.85683300  | 4.44850700  |
| C | 4.29395500  | 2.17271200  | -1.71441800 |
| C | 5.68954400  | 2.70045300  | -2.06476500 |
| C | 3.42193100  | 2.01840600  | -2.96339400 |
| H | 4.43157200  | 1.17075200  | -1.29046900 |
| H | 6.32044300  | 2.77503200  | -1.16705100 |
| H | 6.18540000  | 2.02856700  | -2.78109100 |
| H | 5.63536700  | 3.69978500  | -2.52341800 |
| H | 2.41660500  | 1.66272700  | -2.69731400 |
| H | 3.32181600  | 2.97658900  | -3.49908400 |
| H | 3.87536400  | 1.29540600  | -3.65819900 |
| C | 2.58730400  | 6.74753200  | -0.45475300 |
| C | 1.93285600  | 6.98094400  | -1.81673900 |
| C | 3.93037400  | 7.48238800  | -0.36618100 |
| H | 1.92165200  | 7.16953300  | 0.31626200  |
| H | 0.95329900  | 6.48783600  | -1.88808600 |
| H | 1.78603400  | 8.05709400  | -1.99032700 |
| H | 2.56615700  | 6.60289900  | -2.63450400 |
| H | 4.38780200  | 7.35122800  | 0.62445900  |
| H | 4.63277300  | 7.08575100  | -1.11569800 |
| H | 3.80254900  | 8.55924200  | -0.55273800 |
| O | -1.31340400 | 2.72503200  | 0.99132500  |
| H | -1.80059500 | 2.38234000  | 1.76686400  |
| H | -1.97051900 | -0.10678200 | -1.60216800 |
| O | 0.32661700  | 0.75666200  | 1.01683500  |
| H | -0.30262600 | 1.53821700  | 0.88711900  |

**Int8<sub>IR-Sa-3S</sub>**

|   |             |             |             |
|---|-------------|-------------|-------------|
| S | 5.70605500  | 0.57923600  | -0.19035000 |
| O | 5.71892000  | 0.28864400  | 1.23979100  |
| O | 5.38145400  | 1.93560700  | -0.62948500 |
| O | 1.67877500  | -2.45826200 | 1.45819400  |
| N | 3.30620200  | -0.78988200 | -0.61468000 |
| N | 2.71852500  | -0.49265800 | 0.58369300  |
| C | 7.28540200  | 0.14398700  | -0.87893500 |
| C | 7.97708900  | -0.93939100 | -0.34149500 |
| H | 7.54743900  | -1.50124700 | 0.48962800  |
| C | 9.21487000  | -1.27069100 | -0.88619000 |
| H | 9.77651900  | -2.11458000 | -0.48425800 |
| C | 9.73800700  | -0.51888000 | -1.94091500 |
| H | 10.70902900 | -0.78306900 | -2.36230300 |
| C | 9.03419900  | 0.56999500  | -2.45603000 |
| H | 9.45446500  | 1.15702400  | -3.27339500 |
| C | 7.79282500  | 0.91313900  | -1.92201400 |
| H | 7.21714100  | 1.76320400  | -2.29087100 |
| C | 4.61543900  | -0.55037700 | -1.01629300 |
| C | 4.84389200  | -1.10646500 | -2.24868800 |

|   |             |             |             |
|---|-------------|-------------|-------------|
| H | 5.76691900  | -1.03841700 | -2.81838700 |
| C | 3.63041700  | -1.75854700 | -2.63572700 |
| C | 2.69234300  | -1.54605200 | -1.59862700 |
| C | 1.39523300  | -2.08311600 | -1.64539700 |
| H | 0.71282900  | -1.98400100 | -0.80341800 |
| C | 1.05099800  | -2.78989700 | -2.78199100 |
| H | 0.04784900  | -3.21336300 | -2.84890700 |
| C | 1.96574900  | -2.99498600 | -3.84165900 |
| H | 1.64839300  | -3.56404400 | -4.71635800 |
| C | 3.25238500  | -2.49900500 | -3.77453600 |
| H | 3.96548500  | -2.66866100 | -4.58260700 |
| C | 2.63421700  | 0.87279200  | 1.02584200  |
| H | 3.56516900  | 1.43516100  | 0.86114000  |
| C | 2.35271900  | 0.70593800  | 2.49513400  |
| C | 2.04501700  | 1.68871000  | 3.42893600  |
| H | 1.96986000  | 2.73767600  | 3.13414300  |
| C | 1.80457300  | 1.29729800  | 4.74645800  |
| H | 1.56067100  | 2.04912900  | 5.49878900  |
| C | 1.85598700  | -0.05228200 | 5.10904600  |
| H | 1.65460900  | -0.33967600 | 6.14212300  |
| C | 2.14870100  | -1.03315400 | 4.16075300  |
| H | 2.16286700  | -2.09121200 | 4.42932400  |
| C | 2.40833400  | -0.63269700 | 2.85506300  |
| C | 2.68672400  | -1.52101000 | 1.65940500  |
| C | 3.98959000  | -2.29986500 | 1.75641400  |
| H | 4.16745600  | -2.83293600 | 0.80960600  |
| H | 3.88874600  | -3.04936600 | 2.55252800  |
| H | 4.82815800  | -1.62893400 | 1.97160400  |
| C | -2.88193500 | 1.85580500  | -0.24634600 |
| C | -4.04042900 | 1.26153300  | -0.71229600 |
| C | -4.85776500 | 2.01008200  | -1.63066500 |
| C | -4.55114800 | 3.38055700  | -1.86889700 |
| C | -3.37455500 | 3.94406300  | -1.30664700 |
| C | -2.49155700 | 3.18664400  | -0.57874700 |
| H | -6.17360100 | 0.37529800  | -2.19670400 |
| C | -5.95544700 | 1.43480000  | -2.32901400 |
| C | -5.38404700 | 4.14467500  | -2.73110500 |
| H | -3.13452800 | 4.98722900  | -1.52116400 |
| C | -6.45575400 | 3.56816100  | -3.36627100 |
| C | -6.73065500 | 2.19306500  | -3.17358400 |
| H | -5.14020200 | 5.19673000  | -2.89278600 |
| H | -7.08391900 | 4.16026700  | -4.03302800 |
| H | -7.56171100 | 1.72807500  | -3.70556300 |
| C | -4.40137400 | -0.11581600 | -0.27461600 |
| C | -5.70643100 | -0.43760100 | 0.24332600  |
| C | -3.46205100 | -1.12766600 | -0.32109100 |
| C | -6.69213000 | 0.55100200  | 0.51889500  |
| C | -6.02467800 | -1.79896400 | 0.52147000  |
| C | -3.72784500 | -2.47214900 | 0.06839900  |
| C | -7.93542500 | 0.19979300  | 0.98801100  |
| H | -6.45050300 | 1.60209600  | 0.36478400  |
| C | -7.32522100 | -2.13257700 | 0.98861300  |
| C | -5.01558600 | -2.79473300 | 0.41165100  |
| C | -8.26623400 | -1.15817900 | 1.20986400  |
| H | -8.67105400 | 0.97725300  | 1.19866200  |
| H | -7.55274100 | -3.18215000 | 1.18559200  |
| H | -5.25795600 | -3.82477500 | 0.68224100  |
| H | -9.25905800 | -1.42418400 | 1.57491500  |
| O | -2.19640400 | -0.86228300 | -0.80329300 |
| O | -2.06558800 | 1.16848000  | 0.62842900  |
| P | -1.12998800 | -0.03041000 | 0.07026400  |
| O | -0.46203700 | -0.72413000 | 1.18949600  |
| C | -2.56736800 | -3.40202200 | 0.20843700  |
| C | -2.02637300 | -4.08842400 | -0.90319000 |
| C | -1.95220300 | -3.49896900 | 1.47624800  |
| C | -0.85530300 | -4.83063700 | -0.72718200 |

|   |             |             |             |
|---|-------------|-------------|-------------|
| C | -0.77373200 | -4.24972300 | 1.58235300  |
| C | -0.19510200 | -4.90466500 | 0.50083800  |
| H | -0.44232500 | -5.36333200 | -1.58875500 |
| H | -0.27436900 | -4.30435700 | 2.55340900  |
| C | -1.15692900 | 3.71725600  | -0.16653500 |
| C | -0.17533300 | 4.02584000  | -1.13945300 |
| C | -0.88354000 | 3.93226500  | 1.20214000  |
| C | 1.04151700  | 4.56381700  | -0.69633100 |
| C | 0.34454400  | 4.48233100  | 1.58334100  |
| C | 1.32592400  | 4.81340700  | 0.64900900  |
| H | 1.80189000  | 4.80913400  | -1.44546600 |
| H | 0.52124300  | 4.67125100  | 2.64403300  |
| C | -2.68979300 | -4.16337600 | -2.27800600 |
| C | -2.96896700 | -2.83480500 | -2.99056300 |
| C | -3.95417500 | -5.03014500 | -2.23111300 |
| H | -1.96377500 | -4.70255000 | -2.90898600 |
| H | -2.11006400 | -2.15243200 | -2.94267900 |
| H | -3.19629000 | -3.03595000 | -4.04831700 |
| H | -3.83976400 | -2.31493400 | -2.56707000 |
| H | -3.74628800 | -6.00988700 | -1.77813700 |
| H | -4.74219900 | -4.53816900 | -1.64266200 |
| H | -4.34596900 | -5.19232100 | -3.24674200 |
| C | -2.49724800 | -2.96089800 | 2.80620700  |
| C | -3.46703700 | -3.98769500 | 3.40962600  |
| C | -3.10135800 | -1.55428300 | 2.89468600  |
| H | -1.61297400 | -2.93673900 | 3.46218600  |
| H | -3.02034400 | -4.99165100 | 3.43937700  |
| H | -3.74453800 | -3.69768800 | 4.43436500  |
| H | -4.39165800 | -4.04375300 | 2.81583800  |
| H | -2.45421100 | -0.80052300 | 2.43329800  |
| H | -4.10701000 | -1.48548500 | 2.45975500  |
| H | -3.19632800 | -1.29357400 | 3.96007100  |
| C | 1.08350100  | -5.70312000 | 0.66823100  |
| C | 2.17261600  | -5.26433500 | -0.31229700 |
| C | 0.80271200  | -7.20520600 | 0.55466700  |
| H | 1.45150800  | -5.49572500 | 1.68583700  |
| H | 2.38151500  | -4.19376100 | -0.18680400 |
| H | 3.09791100  | -5.83417600 | -0.13573800 |
| H | 1.86838600  | -5.43493900 | -1.35725500 |
| H | 0.04111500  | -7.52489400 | 1.28036700  |
| H | 0.43438200  | -7.45555400 | -0.45253100 |
| H | 1.71915400  | -7.78785000 | 0.73236100  |
| C | -0.28874600 | 3.89069100  | -2.66449400 |
| C | -0.65213300 | 5.24120000  | -3.29886500 |
| C | -1.14408400 | 2.77005800  | -3.26781500 |
| H | 0.74526600  | 3.67431500  | -2.97780400 |
| H | -0.57705900 | 5.17593400  | -4.39449100 |
| H | -1.68572400 | 5.52520300  | -3.05279400 |
| H | 0.01268300  | 6.04529400  | -2.95254700 |
| H | -1.04534300 | 1.82939800  | -2.71398900 |
| H | -2.20747200 | 3.03367100  | -3.32396100 |
| H | -0.80072400 | 2.59317200  | -4.29800900 |
| C | -1.90258300 | 3.64166600  | 2.29379700  |
| C | -2.39169300 | 4.94419200  | 2.93658300  |
| C | -1.34267700 | 2.67457200  | 3.34043400  |
| H | -2.77604700 | 3.16138100  | 1.83622600  |
| H | -2.83128500 | 5.61641000  | 2.18538400  |
| H | -3.15500100 | 4.73235600  | 3.69984800  |
| H | -1.56421200 | 5.47988900  | 3.42696100  |
| H | -0.93021600 | 1.77106000  | 2.86846900  |
| H | -0.54240800 | 3.14729900  | 3.93170600  |
| H | -2.13430100 | 2.36987100  | 4.04106700  |
| C | 2.68299100  | 5.38375400  | 1.03165900  |
| C | 3.77408300  | 4.31096200  | 0.92179300  |
| C | 2.70538900  | 6.02947300  | 2.41461000  |
| H | 2.91083900  | 6.16566000  | 0.28797900  |

|   |             |             |             |
|---|-------------|-------------|-------------|
| H | 3.79550800  | 3.82379300  | -0.06420900 |
| H | 4.77183900  | 4.74126300  | 1.09118600  |
| H | 3.62740200  | 3.53080600  | 1.68735600  |
| H | 1.90643100  | 6.77583800  | 2.52894800  |
| H | 2.58545400  | 5.27523300  | 3.20814600  |
| H | 3.67063100  | 6.52662000  | 2.58450600  |
| O | 1.60890500  | 1.56825800  | 0.32750100  |
| H | 1.79315200  | 2.51881500  | 0.26381500  |
| H | 0.82291900  | -1.98485200 | 1.42598000  |
| O | -0.22619800 | 0.54597300  | -1.06871300 |
| H | 0.60953500  | 0.93404100  | -0.65156900 |

**Int9***IS-Ra-3S*

|   |             |             |             |
|---|-------------|-------------|-------------|
| S | 5.21098400  | -1.98508500 | -1.54020000 |
| O | 4.58502200  | -1.04979100 | -2.49396300 |
| O | 5.33303400  | -3.39367400 | -1.87297300 |
| O | 0.86222000  | -3.04457600 | 1.64652900  |
| N | 3.06824500  | -1.45593400 | 0.31682800  |
| N | 1.87851600  | -1.93583000 | -0.24786300 |
| C | 6.85728400  | -1.36532900 | -1.25224200 |
| C | 7.09896400  | 0.00221100  | -1.36566600 |
| H | 6.28696100  | 0.67514600  | -1.64747400 |
| C | 8.38943500  | 0.46975400  | -1.13198500 |
| H | 8.60228100  | 1.53647000  | -1.21203600 |
| C | 9.40882200  | -0.42784200 | -0.80404800 |
| H | 10.41807600 | -0.05589700 | -0.62180200 |
| C | 9.15050400  | -1.79613300 | -0.72088100 |
| H | 9.95503500  | -2.49207200 | -0.48071200 |
| C | 7.86229900  | -2.27893900 | -0.95118800 |
| H | 7.62629100  | -3.34311000 | -0.90578300 |
| C | 4.41808000  | -1.74418400 | 0.04048900  |
| C | 5.18909100  | -1.46696100 | 1.13947900  |
| H | 6.27362600  | -1.50001200 | 1.18215700  |
| C | 4.32247800  | -1.01189700 | 2.17350400  |
| C | 3.02287800  | -0.98217600 | 1.63352800  |
| C | 1.94284800  | -0.52429500 | 2.40286800  |
| H | 0.92392400  | -0.51404500 | 2.03657500  |
| C | 2.20053500  | -0.11770500 | 3.69782500  |
| H | 1.36774600  | 0.23289700  | 4.30769200  |
| C | 3.49893000  | -0.15355000 | 4.25167700  |
| H | 3.65324700  | 0.16874300  | 5.28258400  |
| C | 4.56536900  | -0.59312400 | 3.49584300  |
| H | 5.57877300  | -0.61573200 | 3.90084100  |
| C | 1.69616400  | -2.01342400 | -1.73304100 |
| H | 1.67015600  | -0.98678000 | -2.13026400 |
| C | 0.37050800  | -2.73438700 | -1.78177000 |
| C | -0.56771900 | -2.77293800 | -2.80508000 |
| H | -0.43685600 | -2.17885800 | -3.71122700 |
| C | -1.69029600 | -3.58491300 | -2.63355300 |
| H | -2.44946200 | -3.63037200 | -3.41661100 |
| C | -1.86220000 | -4.33040900 | -1.46246100 |
| H | -2.75492500 | -4.94478100 | -1.34333600 |
| C | -0.91763300 | -4.27722500 | -0.43714100 |
| H | -1.05706800 | -4.82854200 | 0.49488100  |
| C | 0.20647200  | -3.48202800 | -0.62609500 |
| C | 1.32538000  | -3.22805700 | 0.36158800  |
| C | 2.40140600  | -4.30150700 | 0.40468500  |
| H | 3.13948200  | -4.02973200 | 1.17400800  |
| H | 2.89794400  | -4.39916200 | -0.56932000 |
| H | 1.94099500  | -5.25593900 | 0.69146000  |
| C | -1.12865000 | 2.48010700  | -0.07629300 |
| C | -2.32393700 | 2.76538900  | -0.70561000 |
| C | -2.31511400 | 3.68305800  | -1.81317200 |
| C | -1.11008200 | 4.37636900  | -2.11825600 |
| C | 0.07144500  | 4.07603400  | -1.39093300 |
| C | 0.10873400  | 3.09565300  | -0.42975100 |
| H | -4.36978300 | 3.35553900  | -2.44857500 |

|   |             |             |             |
|---|-------------|-------------|-------------|
| C | -3.45176700 | 3.91129600  | -2.63806400 |
| C | -1.09222400 | 5.31363200  | -3.18696800 |
| H | 0.99622600  | 4.59811000  | -1.64800700 |
| C | -2.21351700 | 5.53311100  | -3.94774200 |
| C | -3.40010100 | 4.81065500  | -3.67626300 |
| H | -0.16143300 | 5.84359000  | -3.39933000 |
| H | -2.18900200 | 6.24882400  | -4.77051500 |
| H | -4.28100500 | 4.96364300  | -4.30115300 |
| C | -3.57706400 | 2.10009800  | -0.25979500 |
| C | -4.75332600 | 2.86205000  | 0.06178600  |
| C | -3.63688500 | 0.72343300  | -0.15214600 |
| C | -4.74477700 | 4.28147000  | 0.16534400  |
| C | -5.97662300 | 2.17595600  | 0.30360000  |
| C | -4.84027300 | 0.02092900  | 0.14262000  |
| C | -5.89593900 | 4.97389900  | 0.45448400  |
| H | -3.80820900 | 4.82039000  | 0.02276900  |
| C | -7.15511600 | 2.92027000  | 0.58427500  |
| C | -5.98804600 | 0.75631500  | 0.30640800  |
| C | -7.12008000 | 4.29040200  | 0.65330000  |
| H | -5.86457500 | 6.06108500  | 0.53796800  |
| H | -8.08567300 | 2.37603800  | 0.75779100  |
| H | -6.92888600 | 0.23600200  | 0.49859300  |
| H | -8.02719200 | 4.85376000  | 0.87575800  |
| O | -2.51068600 | -0.03359400 | -0.41132900 |
| O | -1.13262800 | 1.55321600  | 0.95735200  |
| P | -1.19420600 | -0.00477100 | 0.51675900  |
| O | -1.17062400 | -0.93700300 | 1.66454800  |
| C | -4.84702800 | -1.46095200 | 0.33373700  |
| C | -4.98889400 | -2.33492800 | -0.76451400 |
| C | -4.77238300 | -1.97583400 | 1.64982300  |
| C | -5.05356900 | -3.71336800 | -0.52349200 |
| C | -4.80975600 | -3.36341100 | 1.81896200  |
| C | -4.95471700 | -4.25405800 | 0.75602400  |
| H | -5.19826800 | -4.37415700 | -1.38115800 |
| H | -4.75450000 | -3.76344900 | 2.83658400  |
| C | 1.40771800  | 2.73203500  | 0.21326700  |
| C | 2.44993500  | 2.13107500  | -0.53348200 |
| C | 1.62996700  | 3.09917500  | 1.55889800  |
| C | 3.67907300  | 1.93491600  | 0.10756000  |
| C | 2.90214600  | 2.94031600  | 2.11854400  |
| C | 3.95748200  | 2.38444600  | 1.39795100  |
| H | 4.47502200  | 1.43726200  | -0.45728300 |
| H | 3.06561800  | 3.27849400  | 3.14336300  |
| C | -5.20978400 | -1.90067800 | -2.21419400 |
| C | -4.23814300 | -0.87179100 | -2.80189200 |
| C | -6.66370900 | -1.46496200 | -2.43833300 |
| H | -5.06507300 | -2.82267100 | -2.80052500 |
| H | -3.19919900 | -1.08079400 | -2.51545000 |
| H | -4.31051300 | -0.89927900 | -3.89984500 |
| H | -4.48301100 | 0.15383600  | -2.49160200 |
| H | -7.36786700 | -2.23290500 | -2.08749900 |
| H | -6.87696500 | -0.52976800 | -1.90020300 |
| H | -6.84905700 | -1.28634200 | -3.50839600 |
| C | -4.79982200 | -1.16307900 | 2.95067700  |
| C | -6.25183200 | -0.92206800 | 3.38958000  |
| C | -3.99302700 | 0.13491000  | 3.05123700  |
| H | -4.35774200 | -1.84204700 | 3.69671600  |
| H | -6.83313500 | -1.85512200 | 3.38692800  |
| H | -6.27611800 | -0.49925000 | 4.40520500  |
| H | -6.74926400 | -0.20552400 | 2.71980500  |
| H | -2.96290600 | -0.00692300 | 2.70506400  |
| H | -4.45327500 | 0.97218400  | 2.50963700  |
| H | -3.94472400 | 0.42823700  | 4.11107200  |
| C | -5.00123200 | -5.74812700 | 1.03626300  |
| C | -3.61682400 | -6.27714700 | 1.43084800  |
| C | -5.57775600 | -6.57205600 | -0.11198100 |



|   |             |             |             |
|---|-------------|-------------|-------------|
| H | -5.66374900 | -5.87770300 | 1.90887300  |
| H | -3.18119500 | -5.69386000 | 2.25430400  |
| H | -3.67730600 | -7.32938000 | 1.74600200  |
| H | -2.92733600 | -6.22232200 | 0.57441100  |
| H | -6.56340200 | -6.19962400 | -0.42524600 |
| H | -4.91178500 | -6.55308300 | -0.98909200 |
| H | -5.68652700 | -7.62294100 | 0.19140100  |
| C | 2.47166000  | 1.72237700  | -2.01595400 |
| C | 3.39800100  | 2.66817100  | -2.79886000 |
| C | 1.17740400  | 1.54396700  | -2.81930100 |
| H | 2.97989200  | 0.74283600  | -2.00660300 |
| H | 3.51182200  | 2.31534500  | -3.83455800 |
| H | 2.97355300  | 3.68416300  | -2.82984800 |
| H | 4.39739700  | 2.73726800  | -2.34698100 |
| H | 0.37579100  | 1.06169200  | -2.25077900 |
| H | 0.79691400  | 2.49829600  | -3.20671500 |
| H | 1.40621800  | 0.91658300  | -3.69590200 |
| C | 0.55109800  | 3.75313000  | 2.41262700  |
| C | 0.94868400  | 5.17889900  | 2.80956200  |
| C | 0.21721100  | 2.90288400  | 3.64073200  |
| H | -0.36723500 | 3.83371300  | 1.81691700  |
| H | 1.16639200  | 5.78909900  | 1.92095600  |
| H | 0.13557200  | 5.66281100  | 3.37082900  |
| H | 1.84465300  | 5.18105600  | 3.44879800  |
| H | -0.12554700 | 1.90415600  | 3.33565200  |
| H | 1.09661300  | 2.78734300  | 4.29392800  |
| H | -0.58215700 | 3.37690100  | 4.22985600  |
| C | 5.38963300  | 2.32984000  | 1.91031800  |
| C | 5.54269800  | 2.77602100  | 3.36114300  |
| C | 6.30308100  | 3.17432800  | 1.01045700  |
| H | 5.72133900  | 1.28037300  | 1.83077400  |
| H | 4.89519500  | 2.19915500  | 4.03422000  |
| H | 6.58386900  | 2.64766100  | 3.69105300  |
| H | 5.28912100  | 3.84234200  | 3.46927700  |
| H | 6.25310300  | 2.85092400  | -0.03922500 |
| H | 6.00236900  | 4.23269300  | 1.04823700  |
| H | 7.34990900  | 3.10107900  | 1.34262800  |
| O | 2.61965900  | -2.80172800 | -2.39607500 |
| H | 3.22300700  | -2.22857400 | -2.89157900 |
| H | 0.07206500  | -2.47046800 | 1.65373800  |
| O | -0.02856000 | -0.17314600 | -0.50689300 |
| H | 0.72479500  | -0.81144200 | -0.21935100 |

### Int10<sub>IS-Sa-3S</sub>

|   |             |             |             |
|---|-------------|-------------|-------------|
| S | -3.04883200 | -0.46761000 | 1.58968300  |
| O | -2.33912300 | 0.20291800  | 2.66122500  |
| O | -2.37776000 | -0.80049800 | 0.31987800  |
| O | -2.24424700 | 2.23320200  | 0.63130900  |
| N | -4.72650400 | 1.16246700  | 0.04355100  |
| N | -3.83590300 | 1.42881800  | -0.94162600 |
| C | -3.67491300 | -1.98999600 | 2.27583200  |
| C | -3.62493300 | -2.15008900 | 3.65696800  |
| H | -3.22196400 | -1.34661200 | 4.27484400  |
| C | -4.06759400 | -3.35407000 | 4.20419300  |
| H | -4.03146800 | -3.50440600 | 5.28377200  |
| C | -4.54495800 | -4.36524900 | 3.37114800  |
| H | -4.88912600 | -5.30611700 | 3.80302800  |
| C | -4.58135800 | -4.18599200 | 1.98577000  |
| H | -4.95018200 | -4.98471900 | 1.34129800  |
| C | -4.13869900 | -2.99005600 | 1.42650800  |
| H | -4.13086500 | -2.82925500 | 0.34683800  |
| C | -4.54603300 | 0.39637200  | 1.18471500  |
| C | -5.68381300 | 0.40486600  | 1.94944600  |
| H | -5.82337000 | -0.12322300 | 2.88939300  |
| C | -6.63854200 | 1.21815800  | 1.25391300  |
| C | -6.00691400 | 1.67203900  | 0.07402100  |
| C | -6.64818800 | 2.48415200  | -0.87205500 |

|   |             |             |             |
|---|-------------|-------------|-------------|
| H | -6.12056600 | 2.79400500  | -1.77519700 |
| C | -7.95649400 | 2.84262900  | -0.59982800 |
| H | -8.49603500 | 3.47496400  | -1.30645700 |
| C | -8.61274400 | 2.40765100  | 0.57608400  |
| H | -9.64428300 | 2.71514800  | 0.75185800  |
| C | -7.97249600 | 1.60191000  | 1.49978800  |
| H | -8.48638700 | 1.26839700  | 2.40255300  |
| C | -3.68197800 | 0.50810600  | -2.04308000 |
| H | -3.72526700 | -0.53339100 | -1.67157900 |
| C | -2.30491300 | 0.86953500  | -2.53422600 |
| C | -1.61764600 | 0.34272100  | -3.62308000 |
| H | -2.07642200 | -0.42573800 | -4.24755600 |
| C | -0.33426300 | 0.82081000  | -3.89448200 |
| H | 0.22716100  | 0.41602100  | -4.73820600 |
| C | 0.24432000  | 1.80277100  | -3.08513900 |
| H | 1.25629500  | 2.15714500  | -3.29217100 |
| C | -0.45668800 | 2.33904600  | -2.00398500 |
| H | -0.00297300 | 3.09462500  | -1.36442900 |
| C | -1.74123100 | 1.87151900  | -1.74868900 |
| C | -2.70008600 | 2.34683300  | -0.67354900 |
| C | -3.13951100 | 3.79285700  | -0.86778800 |
| H | -3.90818900 | 4.03225200  | -0.11763000 |
| H | -3.54813300 | 3.94045500  | -1.87636500 |
| H | -2.27844600 | 4.45787800  | -0.71208300 |
| C | 2.58917200  | -1.95171800 | 0.29543700  |
| C | 3.82327800  | -1.33938000 | 0.38456100  |
| C | 4.96886500  | -2.02339800 | -0.15395900 |
| C | 4.81270800  | -3.36240600 | -0.61504500 |
| C | 3.51101800  | -3.92299900 | -0.69547500 |
| C | 2.39190100  | -3.20645000 | -0.34739400 |
| H | 6.38313700  | -0.37908800 | 0.02488800  |
| C | 6.25305000  | -1.42007300 | -0.26856300 |
| C | 5.94526800  | -4.07758100 | -1.09194000 |
| H | 3.38890500  | -4.91751000 | -1.12881600 |
| C | 7.17925700  | -3.48003500 | -1.15213900 |
| C | 7.32593000  | -2.12980400 | -0.75261300 |
| H | 5.80627600  | -5.10690400 | -1.42920400 |
| H | 8.04152700  | -4.03335300 | -1.52640400 |
| H | 8.29905700  | -1.64406100 | -0.83604500 |
| C | 3.92233100  | 0.03528600  | 0.94005100  |
| C | 4.87493000  | 0.37886600  | 1.95918800  |
| C | 3.09013200  | 1.02820200  | 0.45349100  |
| C | 5.64140100  | -0.59945200 | 2.65215300  |
| C | 5.04349700  | 1.74615800  | 2.31466500  |
| C | 3.21787500  | 2.39582100  | 0.82918000  |
| C | 6.54835700  | -0.23011500 | 3.61588100  |
| H | 5.49373600  | -1.65382500 | 2.41853300  |
| C | 6.00091300  | 2.09950300  | 3.30477400  |
| C | 4.21812800  | 2.72838000  | 1.70826300  |
| C | 6.74278700  | 1.13493600  | 3.93928500  |
| H | 7.11874600  | -0.99659200 | 4.14229400  |
| H | 6.12227300  | 3.15432300  | 3.55902900  |
| H | 4.33827700  | 3.77450900  | 2.00072900  |
| H | 7.47021000  | 1.41397700  | 4.70268600  |
| O | 2.10096500  | 0.69147100  | -0.46741900 |
| O | 1.48955800  | -1.33141700 | 0.85838700  |
| P | 0.80238500  | -0.05696700 | 0.14163600  |
| O | -0.01370500 | 0.74216800  | 1.06913500  |
| C | 2.29239100  | 3.43994200  | 0.29445000  |
| C | 2.58148600  | 4.03567900  | -0.96176900 |
| C | 1.17315500  | 3.86015300  | 1.04511200  |
| C | 1.72717900  | 5.02471500  | -1.44947600 |
| C | 0.32725500  | 4.82739200  | 0.46947900  |
| C | 0.58118800  | 5.42641200  | -0.75745300 |
| H | 1.96600900  | 5.48988700  | -2.41004300 |
| H | -0.57449300 | 5.11502500  | 1.01671800  |

|   |             |             |             |
|---|-------------|-------------|-------------|
| C | 1.03908100  | -3.67653400 | -0.76711100 |
| C | 0.71529400  | -3.65693900 | -2.14618300 |
| C | 0.11087800  | -4.15676600 | 0.17367600  |
| C | -0.50627200 | -4.21222700 | -2.53186200 |
| C | -1.10416500 | -4.69690500 | -0.27069500 |
| C | -1.41326000 | -4.76941800 | -1.62796700 |
| H | -0.75950000 | -4.22126700 | -3.59731300 |
| H | -1.80581700 | -5.08612600 | 0.47156000  |
| C | 3.84351100  | 3.78493300  | -1.79269400 |
| C | 4.27687400  | 2.33641000  | -2.05240700 |
| C | 5.01818100  | 4.60350700  | -1.24063700 |
| H | 3.60372000  | 4.20883500  | -2.78078600 |
| H | 3.42293100  | 1.67381600  | -2.25012100 |
| H | 4.93783100  | 2.31632000  | -2.93171100 |
| H | 4.84800700  | 1.91864500  | -1.21209300 |
| H | 4.74987300  | 5.66451800  | -1.13808000 |
| H | 5.32220100  | 4.22771000  | -0.25257100 |
| H | 5.88716800  | 4.52693200  | -1.91170500 |
| C | 0.74838500  | 3.43778600  | 2.46273600  |
| C | 0.76085400  | 4.67617100  | 3.37758700  |
| C | 1.47137000  | 2.31703800  | 3.21532900  |
| H | -0.29723800 | 3.10879700  | 2.34192800  |
| H | 0.14484300  | 5.50021600  | 2.99585000  |
| H | 0.38750200  | 4.40825500  | 4.37664200  |
| H | 1.79084800  | 5.05083900  | 3.49034300  |
| H | 1.58482500  | 1.39854100  | 2.63501900  |
| H | 2.45709600  | 2.63656700  | 3.58185000  |
| H | 0.85879600  | 2.06438600  | 4.09316800  |
| C | -0.34339300 | 6.48633600  | -1.32588600 |
| C | -0.81210200 | 6.13931700  | -2.74166500 |
| C | 0.32242000  | 7.86584200  | -1.28977500 |
| H | -1.23001500 | 6.52387500  | -0.67136500 |
| H | -1.26820800 | 5.13948100  | -2.78052200 |
| H | -1.55197300 | 6.87316900  | -3.09426400 |
| H | 0.03057000  | 6.15107400  | -3.44971300 |
| H | 0.62724500  | 8.13192900  | -0.26794200 |
| H | 1.22219700  | 7.87720400  | -1.92426600 |
| H | -0.36410600 | 8.64075500  | -1.66210800 |
| C | 1.57392400  | -3.11167900 | -3.29642000 |
| C | 2.45014600  | -4.20482400 | -3.92552400 |
| C | 2.39036000  | -1.83462400 | -3.06696600 |
| H | 0.82734100  | -2.84517300 | -4.06209600 |
| H | 2.86137200  | -3.85209100 | -4.88328800 |
| H | 3.30089400  | -4.45642500 | -3.27664200 |
| H | 1.87481500  | -5.12283800 | -4.11385400 |
| H | 1.79409900  | -1.05280500 | -2.58110500 |
| H | 3.30237800  | -2.00547400 | -2.47903300 |
| H | 2.71178100  | -1.44949900 | -4.04728900 |
| C | 0.42000300  | -4.15968300 | 1.66255200  |
| C | 0.57923500  | -5.59100000 | 2.18503100  |
| C | -0.63749400 | -3.39191800 | 2.45712500  |
| H | 1.37951900  | -3.64679700 | 1.81220500  |
| H | 1.36459300  | -6.12835400 | 1.63372100  |
| H | 0.84717200  | -5.58585400 | 3.25206700  |
| H | -0.35908000 | -6.15660300 | 2.07476900  |
| H | -0.76119300 | -2.36956900 | 2.06986600  |
| H | -1.61390700 | -3.90101000 | 2.41195900  |
| H | -0.34807800 | -3.32125100 | 3.51652500  |
| C | -2.63046000 | -5.49282200 | -2.17977900 |
| C | -3.78633000 | -5.62097400 | -1.19465900 |
| C | -2.21429400 | -6.87724700 | -2.69484500 |
| H | -2.98610100 | -4.90729000 | -3.04429800 |
| H | -4.09728800 | -4.63803200 | -0.81659600 |
| H | -4.65274200 | -6.09140500 | -1.68136700 |
| H | -3.50837700 | -6.24977300 | -0.33453300 |
| H | -1.41635400 | -6.79941900 | -3.44633500 |

|   |             |             |             |
|---|-------------|-------------|-------------|
| H | -1.83376200 | -7.49035700 | -1.86346300 |
| H | -3.06899300 | -7.40109100 | -3.14847000 |
| O | -4.62245200 | 0.68530800  | -3.07064100 |
| H | -5.47019300 | 0.34263300  | -2.76341300 |
| H | -1.47484700 | 1.63220300  | 0.72246400  |
| O | 0.07343200  | -0.62600900 | -1.13185400 |
| H | -0.88539200 | -0.72189500 | -0.94251300 |

**TS11***Re-Sa-3Re*

|   |             |             |             |
|---|-------------|-------------|-------------|
| S | -3.61204600 | -0.34554900 | 1.66045200  |
| O | -2.56791900 | 0.40506000  | 2.33116800  |
| O | -3.28021900 | -1.35927300 | 0.64429500  |
| O | -1.48042000 | 2.75061000  | 0.80907700  |
| N | -4.40156600 | 1.34403600  | -0.27733000 |
| N | -3.10523700 | 1.33594200  | -0.68822100 |
| C | -4.59818900 | -1.16164700 | 2.89480100  |
| C | -4.57686600 | -0.65529800 | 4.19119900  |
| H | -3.95308000 | 0.21021300  | 4.41942600  |
| C | -5.34772600 | -1.28969400 | 5.16432100  |
| H | -5.34613500 | -0.91361900 | 6.18795400  |
| C | -6.11131400 | -2.40840700 | 4.82971300  |
| H | -6.71034300 | -2.90286700 | 5.59584700  |
| C | -6.10985400 | -2.90712700 | 3.52503500  |
| H | -6.70176100 | -3.78828700 | 3.27515800  |
| C | -5.34575600 | -2.28349100 | 2.54175900  |
| H | -5.31607500 | -2.65531300 | 1.51616700  |
| C | -4.79334300 | 0.72678700  | 0.88764900  |
| C | -6.12060700 | 0.94663300  | 1.14651300  |
| H | -6.68911900 | 0.55627400  | 1.98609900  |
| C | -6.59601400 | 1.75857500  | 0.06075000  |
| C | -5.50026700 | 1.98464000  | -0.81200300 |
| C | -5.62813500 | 2.71761100  | -2.00196200 |
| H | -4.77719300 | 2.86508900  | -2.66833000 |
| C | -6.87706300 | 3.23658700  | -2.29455200 |
| H | -7.01466800 | 3.81072800  | -3.21187200 |
| C | -7.98029000 | 3.03567800  | -1.43377300 |
| H | -8.94755300 | 3.46222600  | -1.70166200 |
| C | -7.85266500 | 2.30426100  | -0.26703500 |
| H | -8.70941600 | 2.14597300  | 0.38980000  |
| C | -2.77613700 | 0.74682200  | -1.94138800 |
| H | -3.64986400 | 0.67375700  | -2.61413500 |
| C | -1.65374100 | 1.59204200  | -2.49759900 |
| C | -0.97675800 | 1.33303800  | -3.68690500 |
| H | -1.34414200 | 0.56328700  | -4.36876900 |
| C | 0.20441600  | 2.02039000  | -3.96206700 |
| H | 0.74691500  | 1.82009500  | -4.88705900 |
| C | 0.72004200  | 2.92800800  | -3.03357900 |
| H | 1.66812000  | 3.43481700  | -3.22611500 |
| C | 0.03497000  | 3.19162700  | -1.84786800 |
| H | 0.44128500  | 3.88166200  | -1.10928700 |
| C | -1.17390900 | 2.54585600  | -1.60180100 |
| C | -2.02509600 | 2.83501300  | -0.39394500 |
| C | -2.91807700 | 4.04348100  | -0.48772900 |
| H | -3.72890300 | 3.96126100  | 0.25010500  |
| H | -3.33392700 | 4.17307900  | -1.49178500 |
| H | -2.30926100 | 4.92362300  | -0.23030800 |
| C | 2.18710900  | -2.39950500 | 0.01934500  |
| C | 3.51622300  | -2.05033500 | 0.12353700  |
| C | 4.49475600  | -2.96852900 | -0.40031400 |
| C | 4.06658400  | -4.26143700 | -0.82034100 |
| C | 2.67745700  | -4.56441100 | -0.86551500 |
| C | 1.72994000  | -3.62391600 | -0.55192500 |
| H | 6.20943300  | -1.64074500 | -0.25593300 |
| C | 5.87282400  | -2.64127800 | -0.52715500 |
| C | 5.02975600  | -5.20049000 | -1.27918500 |
| H | 2.36180200  | -5.54085900 | -1.23692400 |
| C | 6.35897700  | -4.86537700 | -1.35895300 |

|   |             |             |             |
|---|-------------|-------------|-------------|
| C | 6.77849500  | -3.56411900 | -0.99458200 |
| H | 4.68528400  | -6.18984400 | -1.58739100 |
| H | 7.08864500  | -5.59112400 | -1.72047400 |
| H | 7.82930700  | -3.28753600 | -1.09085200 |
| C | 3.89692500  | -0.75616200 | 0.75232300  |
| C | 4.90021200  | -0.70672200 | 1.78383100  |
| C | 3.29167800  | 0.43106600  | 0.36800300  |
| C | 5.42048000  | -1.87601500 | 2.40775600  |
| C | 5.38013900  | 0.55745200  | 2.22652000  |
| C | 3.72513100  | 1.70214400  | 0.84552800  |
| C | 6.39113300  | -1.78775300 | 3.37622600  |
| H | 5.03074300  | -2.85198700 | 2.12071800  |
| C | 6.39931900  | 0.61795700  | 3.21628000  |
| C | 4.79040600  | 1.73972400  | 1.71127200  |
| C | 6.90191100  | -0.52921300 | 3.77651100  |
| H | 6.76583200  | -2.69759900 | 3.84710400  |
| H | 6.75993600  | 1.59886700  | 3.53246300  |
| H | 5.15393900  | 2.70852900  | 2.06201200  |
| H | 7.67802900  | -0.47500200 | 4.54101700  |
| O | 2.27749600  | 0.42419600  | -0.57188500 |
| O | 1.23235400  | -1.55142000 | 0.53415900  |
| P | 0.82114100  | -0.20567200 | -0.25549000 |
| O | -0.08958800 | 0.58624700  | 0.59424500  |
| C | 3.03201400  | 2.97871600  | 0.48648100  |
| C | 3.39011400  | 3.69261300  | -0.68553400 |
| C | 2.10598700  | 3.52987300  | 1.39749700  |
| C | 2.81973300  | 4.94828000  | -0.90594200 |
| C | 1.53983200  | 4.78116500  | 1.09703900  |
| C | 1.88962400  | 5.51459600  | -0.02939200 |
| H | 3.12018400  | 5.50363100  | -1.79967700 |
| H | 0.80824600  | 5.19861800  | 1.79532000  |
| C | 0.27899100  | -3.77503300 | -0.86241800 |
| C | -0.15534600 | -3.72850700 | -2.20663800 |
| C | -0.66327600 | -3.84116600 | 0.18818400  |
| C | -1.53584300 | -3.74668300 | -2.45343200 |
| C | -2.02071600 | -3.87679800 | -0.12135800 |
| C | -2.48332400 | -3.80740700 | -1.43522600 |
| H | -1.86822600 | -3.67041000 | -3.49070800 |
| H | -2.75023900 | -3.89953700 | 0.69197400  |
| C | 4.45814200  | 3.25918500  | -1.69164400 |
| C | 4.35378900  | 1.84186500  | -2.26421900 |
| C | 5.86972300  | 3.52664900  | -1.15277000 |
| H | 4.31907100  | 3.94199800  | -2.54582600 |
| H | 3.31949300  | 1.57351500  | -2.51699300 |
| H | 4.96515200  | 1.78045900  | -3.17701800 |
| H | 4.74123300  | 1.08457200  | -1.56871600 |
| H | 5.97053100  | 4.56293300  | -0.79944000 |
| H | 6.10532700  | 2.85174900  | -0.31745600 |
| H | 6.61631200  | 3.35553600  | -1.94298700 |
| C | 1.73073700  | 2.99634200  | 2.78781500  |
| C | 2.55652900  | 3.74826300  | 3.84426000  |
| C | 1.76163300  | 1.49642600  | 3.09642500  |
| H | 0.68085600  | 3.30672600  | 2.91450200  |
| H | 2.48296300  | 4.83811000  | 3.72247200  |
| H | 2.21165700  | 3.48550200  | 4.85535300  |
| H | 3.61868500  | 3.46833100  | 3.76906400  |
| H | 1.23794100  | 0.90363400  | 2.34026000  |
| H | 2.78015500  | 1.10735900  | 3.22547300  |
| H | 1.23206200  | 1.33905400  | 4.04807500  |
| C | 1.28641000  | 6.88010700  | -0.30277600 |
| C | 0.49973200  | 6.90226900  | -1.61674700 |
| C | 2.36125600  | 7.97113900  | -0.28958400 |
| H | 0.58139700  | 7.08927000  | 0.51820100  |
| H | -0.30527100 | 6.15364900  | -1.61769800 |
| H | 0.05011200  | 7.89247200  | -1.78316500 |
| H | 1.15775300  | 6.68451100  | -2.47250100 |

|   |             |             |             |
|---|-------------|-------------|-------------|
| H | 2.91424900  | 7.97059400  | 0.66017000  |
| H | 3.08665300  | 7.81420900  | -1.10265300 |
| H | 1.90976900  | 8.96454500  | -0.42932200 |
| C | 0.72197600  | -3.65790700 | -3.46399400 |
| C | 1.07806900  | -5.06156700 | -3.97258300 |
| C | 1.95927100  | -2.74966900 | -3.46355300 |
| H | 0.04754500  | -3.22603900 | -4.22023900 |
| H | 1.54529700  | -4.99845300 | -4.96713100 |
| H | 1.79402800  | -5.55707300 | -3.30155300 |
| H | 0.18488800  | -5.69821700 | -4.04808100 |
| H | 1.75769100  | -1.78981900 | -2.97306600 |
| H | 2.83083200  | -3.21346200 | -2.98505800 |
| H | 2.23932100  | -2.54567200 | -4.50845000 |
| C | -0.25570400 | -3.88744500 | 1.65360000  |
| C | -0.50594300 | -5.28530600 | 2.23038100  |
| C | -0.96086300 | -2.80915400 | 2.48370200  |
| H | 0.82448000  | -3.69799900 | 1.71851400  |
| H | 0.03956900  | -6.05268900 | 1.66187000  |
| H | -0.18235000 | -5.33576800 | 3.28092400  |
| H | -1.57763300 | -5.53565800 | 2.19268200  |
| H | -0.82364400 | -1.80957400 | 2.04823800  |
| H | -2.04375700 | -3.00230600 | 2.55220200  |
| H | -0.56023200 | -2.80033700 | 3.50857200  |
| C | -3.97966000 | -3.77100000 | -1.69133100 |
| C | -4.59045800 | -5.16729400 | -1.52629600 |
| C | -4.35273700 | -3.16599400 | -3.04238500 |
| H | -4.39784600 | -3.11790200 | -0.90552000 |
| H | -4.36525800 | -5.58791800 | -0.53565500 |
| H | -5.68364000 | -5.13627400 | -1.65059000 |
| H | -4.17823700 | -5.85314900 | -2.28239100 |
| H | -3.86732600 | -2.18858000 | -3.17716500 |
| H | -4.04714600 | -3.82179600 | -3.87229000 |
| H | -5.44190100 | -3.03285200 | -3.11364600 |
| O | -2.23954000 | -0.58518300 | -1.80366400 |
| H | -2.60848600 | -0.98328700 | -0.98266300 |
| H | -0.93024200 | 1.92597600  | 0.86083400  |
| O | 0.31376700  | -0.59507000 | -1.67318700 |
| H | -0.71468200 | -0.63032300 | -1.74725300 |

**TS12***1Si-Sa-3Si*

|   |              |             |             |
|---|--------------|-------------|-------------|
| S | -5.86155500  | 0.75538400  | 0.32359900  |
| O | -5.70313700  | 0.73099200  | -1.12884800 |
| O | -5.62449600  | 2.00877100  | 1.03317200  |
| O | -1.70805500  | -2.09856100 | -1.64738600 |
| N | -3.49107000  | -0.64411100 | 0.82149600  |
| N | -2.69966100  | -0.16492000 | -0.17970300 |
| C | -7.50241000  | 0.19828700  | 0.72229100  |
| C | -8.10909500  | -0.75094500 | -0.09695900 |
| H | -7.57783300  | -1.13506800 | -0.96934600 |
| C | -9.39426400  | -1.17991800 | 0.22428800  |
| H | -9.89120900  | -1.92257200 | -0.40079400 |
| C | -10.04699200 | -0.65427600 | 1.34169900  |
| H | -11.05431400 | -0.99355100 | 1.58767300  |
| C | -9.42600600  | 0.30509500  | 2.14212100  |
| H | -9.94669000  | 0.71693100  | 3.00735100  |
| C | -8.13888900  | 0.74336500  | 1.83346500  |
| H | -7.62385600  | 1.49857900  | 2.42901000  |
| C | -4.85600900  | -0.51459900 | 1.04892000  |
| C | -5.25406600  | -1.35871900 | 2.05918600  |
| H | -6.25679400  | -1.43123200 | 2.47134700  |
| C | -4.09239600  | -2.08748300 | 2.46585400  |
| C | -3.01756900  | -1.61852500 | 1.67636500  |
| C | -1.71567000  | -2.13132500 | 1.78981400  |
| H | -0.92222800  | -1.78413900 | 1.13058300  |
| C | -1.51051100  | -3.10313700 | 2.75026200  |
| H | -0.50924400  | -3.51886000 | 2.87428500  |
| C | -2.56648100  | -3.58046500 | 3.56432400  |

|   |             |             |             |
|---|-------------|-------------|-------------|
| H | -2.35802600 | -4.35230100 | 4.30647400  |
| C | -3.85127600 | -3.09177800 | 3.42682300  |
| H | -4.66504000 | -3.46777900 | 4.04879600  |
| C | -2.69032500 | 1.21636200  | -0.50034300 |
| H | -3.61013100 | 1.76156300  | -0.24176900 |
| C | -2.41513000 | 1.26860200  | -1.98561900 |
| C | -2.18747900 | 2.43752000  | -2.70541400 |
| H | -2.25936600 | 3.40889200  | -2.21094800 |
| C | -1.86358100 | 2.35686000  | -4.05865500 |
| H | -1.68596700 | 3.26887100  | -4.63215700 |
| C | -1.75548600 | 1.11144400  | -4.68198100 |
| H | -1.48749200 | 1.05406500  | -5.73785500 |
| C | -1.99310500 | -0.05831200 | -3.96144800 |
| H | -1.90785000 | -1.03602100 | -4.44016300 |
| C | -2.34379800 | 0.02903700  | -2.61529200 |
| C | -2.65435800 | -1.16589000 | -1.75974300 |
| C | -4.01250700 | -1.78998100 | -1.90529700 |
| H | -4.21505000 | -2.42507100 | -1.02896200 |
| H | -3.99430400 | -2.43695800 | -2.79561000 |
| H | -4.78793500 | -1.02504200 | -2.00868600 |
| C | 3.07909500  | 1.60314200  | 0.32510700  |
| C | 4.15210400  | 0.86952000  | 0.79646200  |
| C | 5.00676200  | 1.48567900  | 1.77726300  |
| C | 4.83335700  | 2.86815000  | 2.07402300  |
| C | 3.74919400  | 3.58014800  | 1.49460000  |
| C | 2.82416700  | 2.95562800  | 0.69612200  |
| H | 6.12589500  | -0.30197800 | 2.30246600  |
| C | 6.01178600  | 0.76684900  | 2.48204000  |
| C | 5.70450900  | 3.49912900  | 3.00360700  |
| H | 3.61236700  | 4.63316400  | 1.74903600  |
| C | 6.68492200  | 2.78435600  | 3.64555800  |
| C | 6.82572800  | 1.39906100  | 3.39138200  |
| H | 5.56362900  | 4.56206500  | 3.21025800  |
| H | 7.34284900  | 3.27508900  | 4.36392400  |
| H | 7.58299600  | 0.82532700  | 3.92734600  |
| C | 4.39320300  | -0.51274400 | 0.29530400  |
| C | 5.68120600  | -0.92963600 | -0.19770800 |
| C | 3.36252900  | -1.43187100 | 0.25309700  |
| C | 6.76382500  | -0.02601200 | -0.38903300 |
| C | 5.88298000  | -2.29950000 | -0.53654100 |
| C | 3.51861200  | -2.77527800 | -0.19551300 |
| C | 7.98582100  | -0.46924000 | -0.83559200 |
| H | 6.61513200  | 1.03429600  | -0.18767300 |
| C | 7.16368900  | -2.73093200 | -0.97777900 |
| C | 4.78356900  | -3.20037700 | -0.51057800 |
| C | 8.19813700  | -1.83978300 | -1.11731800 |
| H | 8.79733800  | 0.24504100  | -0.98124100 |
| H | 7.30038000  | -3.78647800 | -1.22139700 |
| H | 4.94119000  | -4.23560800 | -0.82073700 |
| H | 9.17511100  | -2.17966900 | -1.46331400 |
| O | 2.10975600  | -1.07793900 | 0.70669700  |
| O | 2.21939600  | 1.04191300  | -0.59574800 |
| P | 1.15290200  | -0.07626900 | -0.11259400 |
| O | 0.44933300  | -0.61631700 | -1.29710500 |
| C | 2.28342900  | -3.58346200 | -0.42576800 |
| C | 1.62600400  | -4.25707300 | 0.62945300  |
| C | 1.72259100  | -3.56877400 | -1.72284100 |
| C | 0.39298600  | -4.86321500 | 0.37229600  |
| C | 0.48274300  | -4.19215100 | -1.91247800 |
| C | -0.21245800 | -4.81928200 | -0.88436400 |
| H | -0.11395300 | -5.38024600 | 1.19159400  |
| H | 0.02831600  | -4.16028500 | -2.90665800 |
| C | 1.58437800  | 3.65563300  | 0.24327600  |
| C | 0.60599300  | 4.06480300  | 1.18138200  |
| C | 1.39901500  | 3.93520600  | -1.12955100 |
| C | -0.50001600 | 4.78537000  | 0.70787400  |

|   |             |             |             |
|---|-------------|-------------|-------------|
| C | 0.28129400  | 4.66849200  | -1.54026800 |
| C | -0.67779900 | 5.12505800  | -0.63577800 |
| H | -1.25855800 | 5.09121100  | 1.43499900  |
| H | 0.17115300  | 4.88798300  | -2.60342100 |
| C | 2.21100300  | -4.45024500 | 2.02792000  |
| C | 2.50474200  | -3.17808900 | 2.83136600  |
| C | 3.43454100  | -5.37422500 | 2.00205000  |
| H | 1.42690300  | -4.98969000 | 2.58453300  |
| H | 1.67425900  | -2.46090900 | 2.78563700  |
| H | 2.67543900  | -3.44851800 | 3.88437200  |
| H | 3.41150400  | -2.66718000 | 2.47793000  |
| H | 3.21287800  | -6.31019000 | 1.46973400  |
| H | 4.28514200  | -4.88667300 | 1.50479200  |
| H | 3.74551000  | -5.62393100 | 3.02779700  |
| C | 2.37789400  | -3.02238600 | -2.99834100 |
| C | 3.31207600  | -4.08251200 | -3.59912400 |
| C | 3.06813100  | -1.65308700 | -2.98418700 |
| H | 1.53604400  | -2.91424700 | -3.70014000 |
| H | 2.80745100  | -5.05486500 | -3.69028800 |
| H | 3.65241600  | -3.77047600 | -4.59814200 |
| H | 4.20419700  | -4.21811600 | -2.97034000 |
| H | 2.44179800  | -0.88705500 | -2.51298800 |
| H | 4.05137700  | -1.66875500 | -2.49593500 |
| H | 3.23523300  | -1.34430100 | -4.02767800 |
| C | -1.56151300 | -5.46211100 | -1.14173300 |
| C | -2.61665700 | -5.02540700 | -0.12434100 |
| C | -1.43310500 | -6.98838200 | -1.18947000 |
| H | -1.89010900 | -5.11213500 | -2.13387500 |
| H | -2.68412100 | -3.92959100 | -0.09102400 |
| H | -3.60159500 | -5.43760800 | -0.39241400 |
| H | -2.37347900 | -5.37845500 | 0.89011400  |
| H | -0.70308200 | -7.30366500 | -1.94869700 |
| H | -1.09524800 | -7.37627100 | -0.21576600 |
| H | -2.40189500 | -7.45556200 | -1.42227800 |
| C | 0.60648100  | 3.84969000  | 2.70143400  |
| C | 1.04887600  | 5.13237700  | 3.42073200  |
| C | 1.31798000  | 2.63306700  | 3.30400000  |
| H | -0.46167400 | 3.71278300  | 2.93567000  |
| H | 0.90829300  | 5.02532300  | 4.50649700  |
| H | 2.11560100  | 5.33281000  | 3.24049500  |
| H | 0.47797900  | 6.00848600  | 3.08136000  |
| H | 1.17722900  | 1.72747900  | 2.70302800  |
| H | 2.39368000  | 2.79852900  | 3.44229500  |
| H | 0.88971800  | 2.44538000  | 4.29985000  |
| C | 2.39767300  | 3.51815100  | -2.19953200 |
| C | 3.07266100  | 4.74533800  | -2.82214800 |
| C | 1.73478500  | 2.64144300  | -3.26718200 |
| H | 3.18885900  | 2.92336300  | -1.72776600 |
| H | 3.57714900  | 5.35165900  | -2.05582600 |
| H | 3.82192200  | 4.43451800  | -3.56517700 |
| H | 2.33887300  | 5.38763500  | -3.33298200 |
| H | 1.20091100  | 1.79319300  | -2.81422500 |
| H | 1.01231200  | 3.21967500  | -3.86447500 |
| H | 2.49332300  | 2.24329300  | -3.95761500 |
| C | -1.87524500 | 5.97251900  | -1.04883500 |
| C | -1.95688600 | 6.23673500  | -2.55070600 |
| C | -1.87456300 | 7.30754100  | -0.29235000 |
| H | -2.78411400 | 5.41965300  | -0.74766800 |
| H | -2.00151500 | 5.31156900  | -3.14257900 |
| H | -2.85760900 | 6.82224800  | -2.78070800 |
| H | -1.08416100 | 6.81428500  | -2.89204700 |
| H | -1.87435200 | 7.16407200  | 0.79625100  |
| H | -0.97854400 | 7.88942600  | -0.55695000 |
| H | -2.76188000 | 7.90078000  | -0.55643100 |
| O | -1.63313400 | 1.86223700  | 0.24557400  |
| H | -1.41638700 | 2.74418200  | -0.10016700 |



|                                |             |             |             |
|--------------------------------|-------------|-------------|-------------|
| H                              | -0.82362100 | -1.66440500 | -1.55509700 |
| O                              | 0.30044600  | 0.50702600  | 1.04709800  |
| H                              | -0.53650400 | 1.02700300  | 0.73399200  |
| <b>TS13<sub>IS-Sa-3R</sub></b> |             |             |             |
| S                              | -2.80629400 | 0.04213700  | 1.89034300  |
| O                              | -2.19514700 | 1.11492500  | 2.68714100  |
| O                              | -2.06461100 | -0.65424000 | 0.85599100  |
| N                              | -4.13057600 | 1.75080300  | 0.20461800  |
| N                              | -2.98014800 | 2.05577400  | -0.46433200 |
| C                              | -3.47938200 | -1.13793100 | 3.02499200  |
| C                              | -3.80189900 | -0.73861800 | 4.32019800  |
| H                              | -3.62765200 | 0.29270600  | 4.62984800  |
| C                              | -4.32612100 | -1.69212000 | 5.18979600  |
| H                              | -4.58444600 | -1.41120600 | 6.21131900  |
| C                              | -4.50761600 | -3.00832200 | 4.75786800  |
| H                              | -4.91412200 | -3.74998800 | 5.44706400  |
| C                              | -4.16432700 | -3.38712500 | 3.45904200  |
| H                              | -4.29549400 | -4.42033800 | 3.13389800  |
| C                              | -3.64141400 | -2.44464600 | 2.57584600  |
| H                              | -3.34035000 | -2.70000900 | 1.55782000  |
| C                              | -4.26067300 | 0.75959700  | 1.16588200  |
| C                              | -5.57680700 | 0.55665000  | 1.46190100  |
| H                              | -5.96257900 | -0.14336600 | 2.19809300  |
| C                              | -6.32828100 | 1.44099800  | 0.61023000  |
| C                              | -5.39835900 | 2.16170800  | -0.17261700 |
| C                              | -5.78684900 | 3.09986100  | -1.13691100 |
| H                              | -5.05184900 | 3.63386300  | -1.74214200 |
| C                              | -7.14740200 | 3.31315700  | -1.29325600 |
| H                              | -7.49173800 | 4.03451700  | -2.03527100 |
| C                              | -8.09592400 | 2.61550900  | -0.51572800 |
| H                              | -9.15708400 | 2.81322900  | -0.66962800 |
| C                              | -7.70186200 | 1.68471000  | 0.43053300  |
| H                              | -8.43975700 | 1.14425600  | 1.02478700  |
| C                              | -2.25486900 | 3.17469500  | -0.20997200 |
| C                              | -1.35639900 | 3.33638200  | -1.37525800 |
| C                              | -0.29895800 | 4.22682400  | -1.55694300 |
| H                              | -0.01889100 | 4.94012200  | -0.77918500 |
| C                              | 0.42789000  | 4.12757800  | -2.73980400 |
| H                              | 1.27360500  | 4.79456800  | -2.90623200 |
| C                              | 0.11582600  | 3.15635700  | -3.70104500 |
| H                              | 0.71953800  | 3.09087000  | -4.60740400 |
| C                              | -0.91890800 | 2.24926900  | -3.49525300 |
| H                              | -1.12978800 | 1.45159600  | -4.20804500 |
| C                              | -1.65211900 | 2.35879900  | -2.32101500 |
| C                              | 3.22044500  | -0.03902200 | 0.24546900  |
| C                              | 3.57833800  | -1.32643500 | 0.60821100  |
| C                              | 4.49176400  | -1.50500500 | 1.70379600  |
| C                              | 5.12116100  | -0.36033700 | 2.27027500  |
| C                              | 4.75117000  | 0.93292600  | 1.81685100  |
| C                              | 3.76492600  | 1.11797100  | 0.87935300  |
| H                              | 4.27329200  | -3.66071600 | 1.87828400  |
| C                              | 4.78168200  | -2.77907200 | 2.26808200  |
| C                              | 6.05929700  | -0.52596000 | 3.32552300  |
| H                              | 5.22027900  | 1.80676600  | 2.27476800  |
| C                              | 6.34073900  | -1.77200800 | 3.82809200  |
| C                              | 5.68008300  | -2.90751300 | 3.30035200  |
| H                              | 6.53893900  | 0.36364400  | 3.73941500  |
| H                              | 7.05684000  | -1.88859400 | 4.64275400  |
| H                              | 5.88026200  | -3.89390600 | 3.72130800  |
| C                              | 2.98617100  | -2.48034000 | -0.11945800 |
| C                              | 3.79950600  | -3.52344900 | -0.68306100 |
| C                              | 1.61364600  | -2.54394600 | -0.29407500 |
| C                              | 5.22164600  | -3.46007200 | -0.71544600 |
| C                              | 3.16662200  | -4.66269400 | -1.25905200 |
| C                              | 0.97639400  | -3.63697900 | -0.95458100 |
| C                              | 5.96485900  | -4.48851300 | -1.24303700 |

|   |             |             |             |
|---|-------------|-------------|-------------|
| H | 5.72278200  | -2.57567900 | -0.32285400 |
| C | 3.96244600  | -5.71808700 | -1.78297400 |
| C | 1.75090900  | -4.69219800 | -1.36610100 |
| C | 5.33262700  | -5.64051700 | -1.77024100 |
| H | 7.05301500  | -4.41227200 | -1.26227600 |
| H | 3.45704100  | -6.58620000 | -2.21141500 |
| H | 1.27500600  | -5.54931100 | -1.84869600 |
| H | 5.93457200  | -6.45265400 | -2.18025000 |
| O | 0.81458900  | -1.56261400 | 0.22544500  |
| O | 2.32903800  | 0.14342400  | -0.78255000 |
| P | 0.73174200  | -0.06091700 | -0.42750300 |
| O | -0.02908900 | -0.04952700 | -1.71512200 |
| C | -0.47681400 | -3.53599300 | -1.28388100 |
| C | -1.47713800 | -3.92855900 | -0.36503300 |
| C | -0.83447200 | -2.99068200 | -2.53588100 |
| C | -2.81548800 | -3.72869600 | -0.70983800 |
| C | -2.19378500 | -2.76512800 | -2.79589700 |
| C | -3.19673100 | -3.10135800 | -1.89628000 |
| H | -3.59102300 | -4.06466500 | -0.01420600 |
| H | -2.47287600 | -2.28957500 | -3.74027900 |
| C | 3.30216600  | 2.49935000  | 0.54892000  |
| C | 2.63572600  | 3.28362400  | 1.51604300  |
| C | 3.62544300  | 3.05687800  | -0.71024800 |
| C | 2.35323000  | 4.61983300  | 1.19448800  |
| C | 3.35097600  | 4.40376800  | -0.95839800 |
| C | 2.72892000  | 5.21411900  | -0.00677000 |
| H | 1.83951300  | 5.23185700  | 1.94342300  |
| H | 3.65896300  | 4.83191300  | -1.91679600 |
| C | -1.20442000 | -4.58557100 | 0.98671000  |
| C | -0.42629000 | -3.71059300 | 1.97731800  |
| C | -0.58509100 | -5.98271200 | 0.86889500  |
| H | -2.20541900 | -4.73592000 | 1.42643000  |
| H | -0.76895600 | -2.66707500 | 1.94718500  |
| H | -0.55432300 | -4.10539900 | 2.99740800  |
| H | 0.65103700  | -3.70963700 | 1.75853600  |
| H | -1.15477700 | -6.61247500 | 0.17000900  |
| H | 0.45474800  | -5.92945100 | 0.51951500  |
| H | -0.58028500 | -6.47614800 | 1.85291800  |
| C | 0.09674200  | -2.72420800 | -3.72655000 |
| C | 0.16526700  | -3.99657000 | -4.58572500 |
| C | 1.50813600  | -2.15970800 | -3.52850400 |
| H | -0.44159600 | -1.96613100 | -4.31776700 |
| H | -0.83787900 | -4.37128600 | -4.83464200 |
| H | 0.70931200  | -3.80006000 | -5.52210300 |
| H | 0.70139800  | -4.79272600 | -4.04687000 |
| H | 1.51164000  | -1.28776700 | -2.86725100 |
| H | 2.22061400  | -2.90471000 | -3.15156700 |
| H | 1.87928500  | -1.83248200 | -4.51252700 |
| C | -4.65056600 | -2.77271600 | -2.17393300 |
| C | -5.19853700 | -1.81519800 | -1.11034400 |
| C | -5.51090700 | -4.03347000 | -2.28877100 |
| H | -4.67933600 | -2.24746100 | -3.14223200 |
| H | -4.54407500 | -0.93594200 | -1.02888900 |
| H | -6.21992800 | -1.48635000 | -1.35881600 |
| H | -5.23865900 | -2.30736000 | -0.12370500 |
| H | -5.13167500 | -4.70377000 | -3.07308100 |
| H | -5.51231500 | -4.59299100 | -1.34026400 |
| H | -6.55391300 | -3.77496400 | -2.52624200 |
| C | 2.21872600  | 2.88898700  | 2.94122800  |
| C | 3.17421000  | 3.52765300  | 3.96129900  |
| C | 1.98219200  | 1.42053100  | 3.31029500  |
| H | 1.24245200  | 3.38782700  | 3.06040600  |
| H | 2.80184200  | 3.36581400  | 4.98406800  |
| H | 4.17190300  | 3.06755800  | 3.89354500  |
| H | 3.28976700  | 4.60898100  | 3.80033900  |
| H | 1.44157400  | 0.87997600  | 2.52593800  |

|   |             |             |             |
|---|-------------|-------------|-------------|
| H | 2.91619900  | 0.88856100  | 3.53289000  |
| H | 1.37008500  | 1.39566000  | 4.22526500  |
| C | 4.32749900  | 2.25388600  | -1.79670900 |
| C | 5.70713900  | 2.83714100  | -2.11829100 |
| C | 3.45563900  | 2.14405300  | -3.05006200 |
| H | 4.48814400  | 1.23421900  | -1.42561700 |
| H | 6.33369600  | 2.88826300  | -1.21598200 |
| H | 6.22391500  | 2.21309400  | -2.86255900 |
| H | 5.62708800  | 3.85423700  | -2.53222800 |
| H | 2.47856800  | 1.70581300  | -2.80210600 |
| H | 3.29338400  | 3.13540800  | -3.50539900 |
| H | 3.94264300  | 1.50504400  | -3.80223900 |
| C | 2.57055900  | 6.71471100  | -0.19217000 |
| C | 2.08553500  | 7.13535800  | -1.57937700 |
| C | 3.89542800  | 7.41118800  | 0.14483400  |
| H | 1.82029400  | 7.05120100  | 0.54327600  |
| H | 1.09544600  | 6.71914900  | -1.81265800 |
| H | 2.00979900  | 8.23095700  | -1.63984900 |
| H | 2.78737400  | 6.81477000  | -2.36483200 |
| H | 4.23293900  | 7.14513700  | 1.15619800  |
| H | 4.67914500  | 7.09937600  | -0.56289200 |
| H | 3.79330200  | 8.50533800  | 0.08553400  |
| H | -0.27836100 | 2.10194900  | 0.83687000  |
| O | 0.37741700  | 0.87387000  | 0.69062500  |
| O | -2.60671400 | 0.14147100  | -1.91210300 |
| H | -1.64348300 | -0.08477300 | -1.74654500 |
| C | -2.77868100 | 1.47489300  | -1.85384200 |
| C | -2.87161900 | 4.31198000  | 0.54069500  |
| H | -3.65683400 | 4.76267800  | -0.08439000 |
| H | -3.32900800 | 3.95306100  | 1.47218100  |
| H | -2.10767400 | 5.05972600  | 0.77303900  |
| H | -3.72144700 | 1.71669700  | -2.37987900 |
| O | -0.87978100 | 2.90187600  | 1.14876900  |
| H | -1.33746200 | 2.46976100  | 1.89884200  |

**TS14<sub>IR-Sa-3S</sub>**

|   |             |             |             |
|---|-------------|-------------|-------------|
| S | 6.16157200  | 1.12424100  | -0.75668600 |
| O | 6.15446900  | 2.54296800  | -0.41183200 |
| O | 5.63684900  | 0.69675100  | -2.04926700 |
| N | 3.90649700  | 0.40096700  | 0.60984000  |
| N | 3.14860500  | 1.23834600  | -0.14879800 |
| C | 7.80835000  | 0.49661800  | -0.56805700 |
| C | 8.66776100  | 1.13066200  | 0.32625900  |
| H | 8.32722000  | 2.01112100  | 0.87310300  |
| C | 9.95363000  | 0.61814000  | 0.48304800  |
| H | 10.64790000 | 1.09539300  | 1.17539400  |
| C | 10.35359500 | -0.49958500 | -0.25196600 |
| H | 11.36242300 | -0.89521700 | -0.12577500 |
| C | 9.47978600  | -1.11121000 | -1.15280300 |
| H | 9.80581200  | -1.97665400 | -1.73048600 |
| C | 8.18970200  | -0.61207800 | -1.32018100 |
| H | 7.48467900  | -1.05567100 | -2.02517000 |
| C | 5.28055900  | 0.23931500  | 0.49877800  |
| C | 5.71221100  | -0.69859400 | 1.39429400  |
| H | 6.73999800  | -1.03014800 | 1.51787200  |
| C | 4.54749000  | -1.15839800 | 2.10476200  |
| C | 3.43362900  | -0.46896200 | 1.57828900  |
| C | 2.12465800  | -0.68421100 | 2.00979900  |
| H | 1.26952700  | -0.19625200 | 1.55221900  |
| C | 1.94408500  | -1.60186200 | 3.02837800  |
| H | 0.92057300  | -1.78858200 | 3.35995500  |
| C | 3.03945900  | -2.29518300 | 3.59197700  |
| H | 2.85791200  | -3.01512100 | 4.39174400  |
| C | 4.33194700  | -2.09379500 | 3.13727300  |
| H | 5.17033700  | -2.64357500 | 3.56741700  |
| C | 2.53725800  | 0.77879500  | -1.44780200 |
| H | 3.38150300  | 0.45355500  | -2.07480200 |

|   |             |             |             |
|---|-------------|-------------|-------------|
| C | 1.96006300  | 2.09551100  | -1.91440700 |
| C | 1.31888600  | 2.38518300  | -3.11040500 |
| H | 1.14136400  | 1.60639300  | -3.85342200 |
| C | 0.92064500  | 3.70511200  | -3.33433800 |
| H | 0.42363900  | 3.96453200  | -4.27062500 |
| C | 1.13971400  | 4.70235500  | -2.37657600 |
| H | 0.81398700  | 5.72351700  | -2.57982000 |
| C | 1.74715000  | 4.40033000  | -1.15842400 |
| H | 1.89184200  | 5.16607200  | -0.39445100 |
| C | 2.15652100  | 3.08734700  | -0.95305700 |
| C | 2.81939200  | 2.48092400  | 0.21936000  |
| C | 3.58354100  | 3.21300600  | 1.26167300  |
| H | 3.75439300  | 2.57083000  | 2.13605100  |
| H | 3.03866700  | 4.11337400  | 1.56289100  |
| H | 4.55905900  | 3.47362500  | 0.82337100  |
| C | -2.57446500 | -2.19372800 | -0.10179000 |
| C | -3.92380200 | -1.91171900 | -0.01557000 |
| C | -4.80340200 | -2.97048600 | 0.40532600  |
| C | -4.28746400 | -4.29419800 | 0.51524300  |
| C | -2.90355700 | -4.53338100 | 0.28816900  |
| C | -2.02789100 | -3.50434800 | 0.05490500  |
| H | -6.56667900 | -1.73510700 | 0.69180900  |
| C | -6.16938900 | -2.74960900 | 0.73264500  |
| C | -5.15907900 | -5.35312400 | 0.88803300  |
| H | -2.52890200 | -5.55675300 | 0.35005400  |
| C | -6.47997400 | -5.11189800 | 1.17590300  |
| C | -6.98356700 | -3.79106300 | 1.11048600  |
| H | -4.74990800 | -6.36330900 | 0.95663900  |
| H | -7.13765900 | -5.93116400 | 1.46955700  |
| H | -8.02563100 | -3.59571300 | 1.36749700  |
| C | -4.42999000 | -0.56035500 | -0.38834600 |
| C | -5.51086700 | -0.41126600 | -1.33157800 |
| C | -3.85484800 | 0.59123600  | 0.12126800  |
| C | -6.03425800 | -1.50184800 | -2.08260700 |
| C | -6.07248300 | 0.87945300  | -1.55373700 |
| C | -4.36494100 | 1.89716800  | -0.15164000 |
| C | -7.08129700 | -1.32612000 | -2.95589700 |
| H | -5.58710200 | -2.48883700 | -1.97090900 |
| C | -7.16739300 | 1.02719700  | -2.44786900 |
| C | -5.48964800 | 2.01293400  | -0.92486500 |
| C | -7.67035900 | -0.05167800 | -3.13134400 |
| H | -7.45604100 | -2.17839800 | -3.52455000 |
| H | -7.58914500 | 2.02429600  | -2.59142100 |
| H | -5.91654200 | 3.00061800  | -1.11286700 |
| H | -8.50648400 | 0.07283700  | -3.82074300 |
| O | -2.81344500 | 0.53854700  | 0.99953500  |
| O | -1.70041000 | -1.18739300 | -0.42566200 |
| P | -1.33175900 | -0.09401100 | 0.73738300  |
| O | -0.42045700 | 0.88713600  | -0.00666400 |
| C | -3.58188000 | 3.06718100  | 0.34667300  |
| C | -3.71208100 | 3.53363900  | 1.67558200  |
| C | -2.63392500 | 3.64749800  | -0.52136000 |
| C | -2.85456100 | 4.54464100  | 2.11783200  |
| C | -1.80685900 | 4.66174800  | -0.02015300 |
| C | -1.88258000 | 5.11302900  | 1.29247200  |
| H | -2.95477200 | 4.89226200  | 3.14983900  |
| H | -1.06808400 | 5.10894300  | -0.69059300 |
| C | -0.55178200 | -3.68133200 | -0.08919200 |
| C | 0.26327500  | -4.04258500 | 1.00476200  |
| C | 0.03495600  | -3.41293800 | -1.35015900 |
| C | 1.65058000  | -4.09237800 | 0.80254800  |
| C | 1.41994300  | -3.47436400 | -1.48860700 |
| C | 2.25174600  | -3.79144500 | -0.41462000 |
| H | 2.29068100  | -4.34627500 | 1.65334000  |
| H | 1.86140500  | -3.24696700 | -2.46197300 |
| C | -4.79288900 | 3.07496700  | 2.65388200  |

|   |             |             |             |
|---|-------------|-------------|-------------|
| C | -4.83524800 | 1.58049000  | 2.99210800  |
| C | -6.17683800 | 3.57748900  | 2.22429100  |
| H | -4.55056000 | 3.59228200  | 3.59585600  |
| H | -3.83499800 | 1.17664000  | 3.19279400  |
| H | -5.46019600 | 1.43510200  | 3.88614000  |
| H | -5.28455200 | 0.98700100  | 2.18363600  |
| H | -6.16617700 | 4.66095500  | 2.03709400  |
| H | -6.51054900 | 3.07116000  | 1.30732200  |
| H | -6.91819800 | 3.36881600  | 3.01050900  |
| C | -2.46708400 | 3.34232200  | -2.01301200 |
| C | -3.48152000 | 4.13582600  | -2.84752700 |
| C | -2.41059900 | 1.88094100  | -2.47185300 |
| H | -1.47719700 | 3.75929900  | -2.25058200 |
| H | -3.48489100 | 5.19972800  | -2.56927000 |
| H | -3.23790300 | 4.05622100  | -3.91838700 |
| H | -4.49842700 | 3.74146100  | -2.70975000 |
| H | -1.75747200 | 1.28299000  | -1.82369900 |
| H | -3.40045000 | 1.40642400  | -2.52085300 |
| H | -1.99104400 | 1.85247700  | -3.49094500 |
| C | -0.91050400 | 6.15667700  | 1.80894100  |
| C | 0.10411900  | 5.51486200  | 2.76179000  |
| C | -1.61539800 | 7.34438500  | 2.46660100  |
| H | -0.35816400 | 6.53621800  | 0.93226400  |
| H | 0.58936900  | 4.65024900  | 2.28578800  |
| H | 0.87076300  | 6.24252600  | 3.07094200  |
| H | -0.40217700 | 5.15169900  | 3.66996000  |
| H | -2.33833600 | 7.80773400  | 1.78056100  |
| H | -2.16012800 | 7.02941500  | 3.36939600  |
| H | -0.88521300 | 8.10908900  | 2.77091600  |
| C | -0.19648900 | -4.43648900 | 2.41175600  |
| C | -0.39231800 | -5.95546000 | 2.51365600  |
| C | -1.37792200 | -3.68530700 | 3.03657000  |
| H | 0.67661200  | -4.20267700 | 3.04344300  |
| H | -0.58002300 | -6.24640900 | 3.55853000  |
| H | -1.25618400 | -6.28214600 | 1.91689900  |
| H | 0.49266100  | -6.49969500 | 2.15347400  |
| H | -1.35569300 | -2.61437600 | 2.79259100  |
| H | -2.34754000 | -4.09151100 | 2.72072700  |
| H | -1.32493400 | -3.79583400 | 4.13107200  |
| C | -0.79845100 | -3.12482400 | -2.59364800 |
| C | -0.72754200 | -4.31819200 | -3.55438000 |
| C | -0.39631800 | -1.82572600 | -3.29619000 |
| H | -1.84974300 | -3.01803500 | -2.29550700 |
| H | -1.05590900 | -5.24336200 | -3.05868900 |
| H | -1.36825000 | -4.14860400 | -4.43291600 |
| H | 0.30290400  | -4.47429000 | -3.90977500 |
| H | -0.48999100 | -0.97099900 | -2.61429000 |
| H | 0.64382700  | -1.86521700 | -3.65453300 |
| H | -1.04789200 | -1.65292500 | -4.16647700 |
| C | 3.76150600  | -3.82510700 | -0.56004000 |
| C | 4.29526900  | -2.59590500 | -1.29834300 |
| C | 4.21842500  | -5.11919200 | -1.24088200 |
| H | 4.17722400  | -3.80791400 | 0.46202100  |
| H | 3.87773400  | -1.67586800 | -0.86704100 |
| H | 5.39388600  | -2.55162700 | -1.23856600 |
| H | 4.01979900  | -2.61467200 | -2.36427200 |
| H | 3.87817500  | -6.00216000 | -0.68171200 |
| H | 3.79962500  | -5.18336300 | -2.25730200 |
| H | 5.31579100  | -5.15831600 | -1.32053100 |
| O | 1.67419800  | -0.26069400 | -1.29365000 |
| H | 0.83468200  | 0.06386000  | -0.88366800 |
| O | -0.85465400 | -0.66217800 | 2.01897800  |
| O | 1.13196800  | 2.39276200  | 1.30461700  |
| H | 0.42840600  | 1.86714900  | 0.76921800  |
| H | 1.22237900  | 1.89957300  | 2.13430100  |

TS15<sub>P-Re</sub>

|   |              |             |             |
|---|--------------|-------------|-------------|
| S | -5.56802500  | 0.16370300  | 0.32149500  |
| O | -5.88267200  | 1.22290600  | 1.27238200  |
| O | -5.11120700  | -1.13439900 | 0.79815900  |
| N | -3.10032300  | 1.10326100  | -0.41646400 |
| N | -2.64935700  | 0.71186800  | 0.80297500  |
| C | -6.97961200  | -0.09171200 | -0.72774800 |
| C | -7.90952200  | 0.93554700  | -0.86393400 |
| H | -7.76734400  | 1.86639900  | -0.31278600 |
| C | -9.00561800  | 0.73034100  | -1.69972400 |
| H | -9.75017500  | 1.51766600  | -1.82264100 |
| C | -9.15228600  | -0.48428900 | -2.37207000 |
| H | -10.01293500 | -0.63976700 | -3.02437900 |
| C | -8.21322300  | -1.50520500 | -2.21233100 |
| H | -8.34210900  | -2.45406900 | -2.73418300 |
| C | -7.11238300  | -1.31536200 | -1.37971200 |
| H | -6.36480500  | -2.09476000 | -1.22207300 |
| C | -4.38477700  | 0.80999100  | -0.84079400 |
| C | -4.53957000  | 1.13863900  | -2.15647600 |
| H | -5.44690700  | 1.02719300  | -2.74363400 |
| C | -3.27313000  | 1.66229600  | -2.59075300 |
| C | -2.38835400  | 1.62357700  | -1.48494800 |
| C | -1.07197800  | 2.09538500  | -1.56111300 |
| H | -0.42081300  | 2.13274800  | -0.68563500 |
| C | -0.64732200  | 2.55857700  | -2.79602700 |
| H | 0.37584800   | 2.91981600  | -2.89441600 |
| C | -1.50355700  | 2.59063100  | -3.91677600 |
| H | -1.12306000  | 2.96909600  | -4.86619800 |
| C | -2.81507600  | 2.16183200  | -3.82309700 |
| H | -3.48409400  | 2.20109000  | -4.68389700 |
| C | -2.32358200  | -0.59837700 | 1.07113600  |
| C | -2.18895900  | -0.65675900 | 2.53254200  |
| C | -2.01287400  | -1.76569800 | 3.35301000  |
| H | -1.96497700  | -2.76444400 | 2.91603500  |
| C | -1.90694400  | -1.54472300 | 4.72306200  |
| H | -1.78097500  | -2.38677600 | 5.40488000  |
| C | -1.96066600  | -0.24035600 | 5.23727100  |
| H | -1.88045700  | -0.09068900 | 6.31540600  |
| C | -2.11762600  | 0.86785100  | 4.40605300  |
| H | -2.15055400  | 1.87573400  | 4.82349700  |
| C | -2.23836200  | 0.65052300  | 3.03351400  |
| C | -2.33971200  | 1.61062600  | 1.90587000  |
| C | -3.14612900  | 2.87343800  | 1.99140600  |
| H | -2.99176100  | 3.48816000  | 1.09213700  |
| H | -2.81373500  | 3.45945300  | 2.85957700  |
| H | -4.21758400  | 2.64525000  | 2.09197300  |
| C | 2.79983100   | -1.90000700 | -0.18271900 |
| C | 3.93167700   | -1.23956400 | -0.61628300 |
| C | 4.81201500   | -1.93422300 | -1.51653600 |
| C | 4.57524300   | -3.31412500 | -1.78150000 |
| C | 3.41323800   | -3.94351100 | -1.25694400 |
| C | 2.47968600   | -3.24271800 | -0.53574000 |
| H | 6.07003700   | -0.23201800 | -2.00863800 |
| C | 5.90418500   | -1.29766800 | -2.16795700 |
| C | 5.46794100   | -4.02323200 | -2.63062900 |
| H | 3.22753300   | -4.99257500 | -1.49562200 |
| C | 6.53120900   | -3.38771400 | -3.22278700 |
| C | 6.73955800   | -2.00568800 | -2.99875800 |
| H | 5.27835400   | -5.08239400 | -2.81634400 |
| H | 7.20550800   | -3.93958200 | -3.87894500 |
| H | 7.56658300   | -1.49601100 | -3.49487500 |
| C | 4.19251700   | 0.14942000  | -0.14913700 |
| C | 5.44619100   | 0.52520700  | 0.45070900  |
| C | 3.19782700   | 1.10583300  | -0.22974300 |
| C | 6.47257400   | -0.41657200 | 0.74366600  |
| C | 5.66471400   | 1.88786000  | 0.80495000  |
| C | 3.37266000   | 2.45265900  | 0.19961700  |

|   |             |             |             |
|---|-------------|-------------|-------------|
| C | 7.66127400  | -0.01514900 | 1.30434900  |
| H | 6.30557200  | -1.47162400 | 0.53028800  |
| C | 6.91100700  | 2.27531800  | 1.36887200  |
| C | 4.61021400  | 2.82759300  | 0.65610700  |
| C | 7.89409100  | 1.34792400  | 1.60671900  |
| H | 8.42962000  | -0.75701900 | 1.52609400  |
| H | 7.06232700  | 3.32626800  | 1.62315200  |
| H | 4.77039300  | 3.85870000  | 0.98058300  |
| H | 8.84500900  | 1.65343200  | 2.04505800  |
| O | 1.96765700  | 0.76578200  | -0.77656500 |
| O | 1.93264100  | -1.25382100 | 0.68040700  |
| P | 0.94274100  | -0.11741900 | 0.10547700  |
| O | 0.27521100  | 0.59658200  | 1.22088100  |
| C | 2.20636600  | 3.38525500  | 0.18726700  |
| C | 1.89886100  | 4.11827600  | -0.98501400 |
| C | 1.39610000  | 3.50570700  | 1.33543700  |
| C | 0.76213000  | 4.92735400  | -0.99245800 |
| C | 0.23986600  | 4.30069700  | 1.24513400  |
| C | -0.10239400 | 5.01154100  | 0.10095600  |
| H | 0.53214100  | 5.49080400  | -1.90158200 |
| H | -0.40950900 | 4.37248600  | 2.12355300  |
| C | 1.15218600  | -3.80272900 | -0.14830500 |
| C | 0.16293300  | -4.05069300 | -1.12917100 |
| C | 0.86953800  | -4.02462800 | 1.21617800  |
| C | -1.08666100 | -4.51132800 | -0.69822800 |
| C | -0.38845700 | -4.50847300 | 1.58105900  |
| C | -1.39040700 | -4.74287800 | 0.64222800  |
| H | -1.85949900 | -4.67981900 | -1.45386800 |
| H | -0.59741900 | -4.70232000 | 2.63746200  |
| C | 2.77839300  | 4.17570400  | -2.23566200 |
| C | 3.28732600  | 2.85074900  | -2.81990800 |
| C | 3.94298000  | 5.15281400  | -2.02919300 |
| H | 2.12933300  | 4.62150400  | -3.00736500 |
| H | 2.52303300  | 2.06137700  | -2.79459500 |
| H | 3.57865500  | 3.01249800  | -3.86840100 |
| H | 4.17686100  | 2.48258500  | -2.29087900 |
| H | 3.58323600  | 6.13495700  | -1.69149900 |
| H | 4.64366200  | 4.76441700  | -1.27558400 |
| H | 4.50051500  | 5.28896300  | -2.96820200 |
| C | 1.67217500  | 2.96873800  | 2.74779900  |
| C | 2.17547500  | 4.13917300  | 3.60954700  |
| C | 2.58270400  | 1.76138900  | 2.99162700  |
| H | 0.67732500  | 2.67926200  | 3.12874200  |
| H | 1.49176300  | 4.99868500  | 3.57789100  |
| H | 2.29207800  | 3.82336200  | 4.65693000  |
| H | 3.15841000  | 4.47811500  | 3.24601600  |
| H | 2.35202400  | 0.90726400  | 2.34851300  |
| H | 3.64642600  | 2.01028800  | 2.88484200  |
| H | 2.42813700  | 1.43171100  | 4.03001700  |
| C | -1.34925200 | 5.87462200  | 0.04759400  |
| C | -2.28178600 | 5.46980100  | -1.09802500 |
| C | -0.98126200 | 7.35910700  | -0.04503900 |
| H | -1.88778800 | 5.71967700  | 0.99735100  |
| H | -2.58051800 | 4.41354300  | -1.02667700 |
| H | -3.19031200 | 6.09027400  | -1.09174800 |
| H | -1.79017500 | 5.60224000  | -2.07440300 |
| H | -0.33167600 | 7.66008400  | 0.78895400  |
| H | -0.44462500 | 7.56811000  | -0.98337600 |
| H | -1.88486100 | 7.98634100  | -0.02704100 |
| C | 0.30461100  | -3.91446100 | -2.65107600 |
| C | 0.67482900  | -5.26882700 | -3.27251800 |
| C | 1.17900700  | -2.80132600 | -3.24330000 |
| H | -0.72088800 | -3.69181700 | -2.98574500 |
| H | 0.63766400  | -5.20884200 | -4.37078800 |
| H | 1.69598800  | -5.56355200 | -2.98828900 |
| H | -0.00984000 | -6.06328900 | -2.94316300 |

|   |             |             |             |
|---|-------------|-------------|-------------|
| H | 1.07807700  | -1.85843600 | -2.69339800 |
| H | 2.24120900  | -3.07258800 | -3.28312000 |
| H | 0.85407200  | -2.62236800 | -4.27932600 |
| C | 1.90254900  | -3.79729400 | 2.31056700  |
| C | 2.37221900  | -5.13601100 | 2.89072000  |
| C | 1.37773000  | -2.86726200 | 3.40774100  |
| H | 2.78186100  | -3.31360000 | 1.86475900  |
| H | 2.79313000  | -5.78084300 | 2.10559900  |
| H | 3.14333400  | -4.97661900 | 3.65929000  |
| H | 1.53441100  | -5.67663700 | 3.35750700  |
| H | 0.99879300  | -1.92637900 | 2.98315800  |
| H | 0.56054000  | -3.33886300 | 3.97566100  |
| H | 2.17985200  | -2.62786000 | 4.12199600  |
| C | -2.75938600 | -5.24215700 | 1.06378100  |
| C | -2.97355200 | -6.69040700 | 0.61151300  |
| C | -3.88466700 | -4.33289100 | 0.56282000  |
| H | -2.77859300 | -5.22896800 | 2.16694300  |
| H | -2.18470900 | -7.35102500 | 0.99866500  |
| H | -3.94679300 | -7.06775300 | 0.95951400  |
| H | -2.95880500 | -6.75611400 | -0.48763400 |
| H | -3.73638400 | -3.28692300 | 0.86195700  |
| H | -3.93958100 | -4.35339900 | -0.53725300 |
| H | -4.85527700 | -4.67637800 | 0.95136700  |
| O | -2.14018500 | -1.46367200 | 0.22104300  |
| H | -0.85217700 | -1.10349500 | -0.64953500 |
| H | -0.81136600 | 1.77515700  | 1.64773300  |
| O | 0.03475100  | -0.75298000 | -0.99495100 |

**TS16<sub>P-Si</sub>**

|   |             |             |             |
|---|-------------|-------------|-------------|
| S | 2.67529300  | -0.00398600 | 1.80418300  |
| O | 2.08879300  | -1.30435700 | 2.11160800  |
| O | 1.91625200  | 1.07254400  | 1.18579400  |
| N | 4.07311900  | -0.73047500 | -0.48066500 |
| N | 3.02638600  | -1.32646700 | -1.10220400 |
| C | 3.38667700  | 0.62610900  | 3.31195500  |
| C | 3.70492600  | -0.26802800 | 4.33054800  |
| H | 3.50192200  | -1.33114100 | 4.19491100  |
| C | 4.26585800  | 0.23278400  | 5.50398900  |
| H | 4.52074400  | -0.44732000 | 6.31754600  |
| C | 4.49384300  | 1.60330300  | 5.63930400  |
| H | 4.93102500  | 1.98994900  | 6.56112100  |
| C | 4.16005000  | 2.48491500  | 4.60944600  |
| H | 4.33098400  | 3.55561300  | 4.72689600  |
| C | 3.59892100  | 1.99770600  | 3.43093300  |
| H | 3.30981300  | 2.66033100  | 2.61323700  |
| C | 4.13693300  | -0.25650700 | 0.82025900  |
| C | 5.42268400  | 0.09936300  | 1.12328000  |
| H | 5.75773900  | 0.53318300  | 2.06112600  |
| C | 6.21384500  | -0.16200900 | -0.04755800 |
| C | 5.34206300  | -0.68163500 | -1.02756900 |
| C | 5.76906800  | -1.04933200 | -2.30833300 |
| H | 5.06629300  | -1.44361600 | -3.04375900 |
| C | 7.11307600  | -0.87304200 | -2.59279000 |
| H | 7.48885600  | -1.13963300 | -3.58148500 |
| C | 8.00718100  | -0.34781100 | -1.63360300 |
| H | 9.05691500  | -0.22077600 | -1.90039000 |
| C | 7.57360900  | 0.00834900  | -0.36832100 |
| H | 8.26818300  | 0.41514800  | 0.36796500  |
| C | 2.23207800  | -0.67889400 | -2.02739400 |
| C | 1.42295600  | -1.75416600 | -2.64594100 |
| C | 0.53164500  | -1.67975900 | -3.71137100 |
| H | 0.30948500  | -0.72392800 | -4.18664000 |
| C | -0.06712600 | -2.86318100 | -4.13864500 |
| H | -0.77428500 | -2.84577400 | -4.96872800 |
| C | 0.23994100  | -4.07937900 | -3.51543500 |
| H | -0.23480100 | -4.99578400 | -3.87221100 |
| C | 1.13559600  | -4.14288200 | -2.44830500 |



|   |             |             |             |
|---|-------------|-------------|-------------|
| H | 1.36561700  | -5.09375000 | -1.96739300 |
| C | 1.71965600  | -2.95996100 | -2.00928100 |
| C | 2.67854000  | -2.72091400 | -0.89592000 |
| C | 3.84677500  | -3.65492600 | -0.71147900 |
| H | 4.46277900  | -3.34386900 | 0.14397000  |
| H | 4.47827900  | -3.67995600 | -1.61340500 |
| H | 3.47507500  | -4.66846400 | -0.51098400 |
| C | -2.24490300 | 2.16864400  | -0.17633000 |
| C | -3.54553900 | 1.71784100  | -0.06872100 |
| C | -4.60092500 | 2.56159600  | -0.56109400 |
| C | -4.28693700 | 3.88359400  | -0.98760700 |
| C | -2.93051000 | 4.30828800  | -1.01292500 |
| C | -1.90555600 | 3.45816100  | -0.68708500 |
| H | -6.19711400 | 1.09897700  | -0.37629200 |
| C | -5.94974700 | 2.12169800  | -0.66140200 |
| C | -5.32932800 | 4.73577200  | -1.44282800 |
| H | -2.69705500 | 5.31375400  | -1.37211800 |
| C | -6.62685100 | 4.29059800  | -1.50446400 |
| C | -6.93450600 | 2.96327400  | -1.12145000 |
| H | -5.07266600 | 5.74937700  | -1.75768700 |
| H | -7.41833000 | 4.95054600  | -1.86214500 |
| H | -7.96103800 | 2.60222000  | -1.19803200 |
| C | -3.80450800 | 0.38865500  | 0.54398900  |
| C | -4.71899800 | 0.23084700  | 1.64198300  |
| C | -3.09703900 | -0.71742100 | 0.10763800  |
| C | -5.36354300 | 1.32986900  | 2.27807000  |
| C | -4.97369000 | -1.07735500 | 2.14336400  |
| C | -3.25688300 | -2.01147000 | 0.67835100  |
| C | -6.24877400 | 1.12867900  | 3.30945400  |
| H | -5.14144700 | 2.34362700  | 1.94704200  |
| C | -5.90737200 | -1.25590900 | 3.20114200  |
| C | -4.23221000 | -2.17346500 | 1.63237200  |
| C | -6.54028400 | -0.17892400 | 3.76841300  |
| H | -6.72547400 | 1.98708600  | 3.78479400  |
| H | -6.09567700 | -2.26882400 | 3.56289900  |
| H | -4.39576900 | -3.16580300 | 2.05880700  |
| H | -7.25058100 | -0.32370700 | 4.58349000  |
| O | -2.20755300 | -0.57675400 | -0.94057300 |
| O | -1.20739200 | 1.36004800  | 0.25497800  |
| P | -0.76690300 | 0.11238400  | -0.68315100 |
| O | 0.26764000  | -0.75667400 | -0.10833700 |
| C | -2.32845600 | -3.14157800 | 0.36487600  |
| C | -2.57460300 | -4.02248600 | -0.71081500 |
| C | -1.24133100 | -3.37331700 | 1.24209000  |
| C | -1.75237400 | -5.14511600 | -0.86710900 |
| C | -0.42853800 | -4.48796500 | 0.99950400  |
| C | -0.67897800 | -5.40571700 | -0.01901400 |
| H | -1.97930500 | -5.83303800 | -1.68399300 |
| H | 0.41087100  | -4.66801200 | 1.67982500  |
| C | -0.46294200 | 3.79003600  | -0.86010000 |
| C | 0.13413700  | 3.79175800  | -2.13450100 |
| C | 0.32155400  | 3.98449400  | 0.30328200  |
| C | 1.53093500  | 3.92601900  | -2.19800300 |
| C | 1.69819600  | 4.13190600  | 0.17606000  |
| C | 2.32827500  | 4.07553700  | -1.07091600 |
| H | 2.01329500  | 3.88551900  | -3.17943000 |
| H | 2.30518200  | 4.26492600  | 1.07400200  |
| C | -3.75343000 | -3.91958500 | -1.67861700 |
| C | -3.92211400 | -2.58436500 | -2.40844700 |
| C | -5.06918300 | -4.35766600 | -1.02285600 |
| H | -3.53200500 | -4.66503600 | -2.45942200 |
| H | -2.96286500 | -2.20145700 | -2.78059000 |
| H | -4.60193600 | -2.72430200 | -3.26257600 |
| H | -4.36768100 | -1.81352200 | -1.76490400 |
| H | -4.96395400 | -5.33972400 | -0.53941700 |
| H | -5.39294700 | -3.63163600 | -0.26374700 |

|                          |             |             |             |
|--------------------------|-------------|-------------|-------------|
| H                        | -5.86538100 | -4.42832400 | -1.77947000 |
| C                        | -0.93114600 | -2.65240400 | 2.56380600  |
| C                        | -1.63054300 | -3.40078700 | 3.71092900  |
| C                        | -1.14364700 | -1.14530200 | 2.72644900  |
| H                        | 0.15265400  | -2.79494800 | 2.69551000  |
| H                        | -1.43577800 | -4.48234400 | 3.66898100  |
| H                        | -1.27949100 | -3.02051200 | 4.68201300  |
| H                        | -2.71980300 | -3.24881100 | 3.66932800  |
| H                        | -0.60295200 | -0.57801600 | 1.96300300  |
| H                        | -2.20122700 | -0.84771700 | 2.74168100  |
| H                        | -0.71562300 | -0.85587000 | 3.69911600  |
| C                        | 0.17296900  | -6.66262700 | -0.11713400 |
| C                        | -0.04746500 | -7.46672500 | -1.39624000 |
| C                        | -0.06245000 | -7.55840500 | 1.10638600  |
| H                        | 1.22973300  | -6.33875900 | -0.08893000 |
| H                        | 0.08721500  | -6.85763200 | -2.30204100 |
| H                        | 0.65704000  | -8.30913500 | -1.44362100 |
| H                        | -1.06548300 | -7.88407500 | -1.42319800 |
| H                        | 0.13843900  | -7.02207200 | 2.04380400  |
| H                        | -1.11036600 | -7.89414100 | 1.12948700  |
| H                        | 0.58452300  | -8.44768600 | 1.07152800  |
| C                        | -0.55412700 | 3.72145100  | -3.50460800 |
| C                        | -0.62307800 | 5.13840100  | -4.09549100 |
| C                        | -1.91616200 | 3.03717100  | -3.67796400 |
| H                        | 0.15399200  | 3.15052600  | -4.12801000 |
| H                        | -1.01797100 | 5.11017600  | -5.12237500 |
| H                        | -1.29416600 | 5.76817300  | -3.49063200 |
| H                        | 0.36405200  | 5.62085100  | -4.11319200 |
| H                        | -2.00809300 | 2.11515900  | -3.09373300 |
| H                        | -2.75040500 | 3.70056200  | -3.41741000 |
| H                        | -2.03361000 | 2.77798400  | -4.74128300 |
| C                        | -0.34838500 | 4.10956500  | 1.66496700  |
| C                        | -0.84001200 | 5.54878500  | 1.86502900  |
| C                        | 0.52780500  | 3.66329000  | 2.83276500  |
| H                        | -1.22990600 | 3.45355000  | 1.66916400  |
| H                        | -1.53149800 | 5.84866600  | 1.06431200  |
| H                        | -1.36125500 | 5.65350700  | 2.82861300  |
| H                        | 0.01210600  | 6.24610100  | 1.85517000  |
| H                        | 0.91652900  | 2.65189900  | 2.65426000  |
| H                        | 1.37539600  | 4.34964800  | 2.99267500  |
| H                        | -0.06107900 | 3.65830600  | 3.76165400  |
| C                        | 3.83904000  | 4.11140700  | -1.18709100 |
| C                        | 4.43718500  | 2.82344800  | -0.61333500 |
| C                        | 4.44691400  | 5.35066800  | -0.52717800 |
| H                        | 4.07895700  | 4.14681100  | -2.26213800 |
| H                        | 3.97834800  | 1.94049500  | -1.08332900 |
| H                        | 5.52786200  | 2.78815700  | -0.76312500 |
| H                        | 4.23952300  | 2.76262000  | 0.46885900  |
| H                        | 4.01965300  | 6.27538800  | -0.94057700 |
| H                        | 4.26296000  | 5.34989200  | 0.55852400  |
| H                        | 5.53654000  | 5.37357300  | -0.67765000 |
| O                        | 2.24294400  | 0.51456800  | -2.26421800 |
| H                        | 0.49412100  | 0.90995700  | -2.23767600 |
| H                        | 1.79902100  | -2.73957600 | 0.37222100  |
| O                        | -0.47103400 | 0.72753200  | -2.10994300 |
| <b>Int11<sub>p</sub></b> |             |             |             |
| S                        | -2.55923900 | 0.13235600  | 1.62791800  |
| O                        | -1.96864700 | 1.48040500  | 1.71201900  |
| O                        | -1.91937200 | -0.83607800 | 0.74487800  |
| N                        | -4.58283700 | 0.94565400  | -0.00265600 |
| N                        | -3.74086300 | 1.65325500  | -0.80333900 |
| C                        | -2.65823100 | -0.57099200 | 3.24808400  |
| C                        | -2.72126300 | 0.27083100  | 4.35568000  |
| H                        | -2.69791600 | 1.35306200  | 4.21843500  |
| C                        | -2.79728200 | -0.31064400 | 5.61916000  |
| H                        | -2.84304900 | 0.32206400  | 6.50602400  |

|   |             |             |             |
|---|-------------|-------------|-------------|
| C | -2.80435600 | -1.70124500 | 5.74874600  |
| H | -2.86021800 | -2.14909400 | 6.74198300  |
| C | -2.73077900 | -2.52470600 | 4.62371000  |
| H | -2.72311600 | -3.60956600 | 4.73648400  |
| C | -2.65405500 | -1.96067200 | 3.35202600  |
| H | -2.57270100 | -2.57014700 | 2.44813700  |
| C | -4.25230600 | 0.33356200  | 1.18976100  |
| C | -5.37504700 | -0.15297800 | 1.80211300  |
| H | -5.40261000 | -0.70903700 | 2.73543200  |
| C | -6.47718900 | 0.17838400  | 0.94267500  |
| C | -5.94672300 | 0.85974000  | -0.17630800 |
| C | -6.73633600 | 1.33349000  | -1.23107400 |
| H | -6.28583600 | 1.85911200  | -2.07431500 |
| C | -8.09564900 | 1.08953000  | -1.14262600 |
| H | -8.75196400 | 1.43259700  | -1.94346300 |
| C | -8.65530800 | 0.40101300  | -0.04104500 |
| H | -9.73179200 | 0.22879400  | -0.01600100 |
| C | -7.86537400 | -0.05396100 | 0.99884700  |
| H | -8.30345900 | -0.58438600 | 1.84532900  |
| C | -3.68696500 | 3.04073400  | -0.81081400 |
| C | -2.79590300 | 3.36643200  | -1.82109600 |
| C | -2.32353300 | 4.61767900  | -2.33371500 |
| H | -2.66954800 | 5.55897100  | -1.90138100 |
| C | -1.44234100 | 4.61228400  | -3.37788700 |
| H | -1.08679000 | 5.56043400  | -3.78624100 |
| C | -0.96049200 | 3.38767400  | -3.96061400 |
| H | -0.24936000 | 3.44133500  | -4.78623700 |
| C | -1.37055600 | 2.17317300  | -3.49208800 |
| H | -0.99494900 | 1.23847100  | -3.91043700 |
| C | -2.31118200 | 2.14036100  | -2.41955800 |
| C | 3.37752500  | 0.38301000  | 0.00670800  |
| C | 3.92523200  | -0.86123900 | 0.25669200  |
| C | 5.07026500  | -0.93462800 | 1.12751600  |
| C | 5.71109800  | 0.27296800  | 1.52570000  |
| C | 5.12412000  | 1.52018900  | 1.18421500  |
| C | 3.92358000  | 1.59547400  | 0.52353000  |
| H | 5.08011000  | -3.09523000 | 1.37202200  |
| C | 5.58717900  | -2.16398400 | 1.62309700  |
| C | 6.87936300  | 0.21358000  | 2.33347300  |
| H | 5.60158800  | 2.44060000  | 1.52511200  |
| C | 7.37380700  | -0.99114800 | 2.76773500  |
| C | 6.70608200  | -2.19005200 | 2.42122700  |
| H | 7.36290600  | 1.15043800  | 2.61808600  |
| H | 8.26595600  | -1.02658100 | 3.39436100  |
| H | 7.07849000  | -3.14439700 | 2.79612400  |
| C | 3.32729600  | -2.08086900 | -0.34918300 |
| C | 4.13256200  | -3.05445500 | -1.03965900 |
| C | 1.96278000  | -2.29817100 | -0.27918200 |
| C | 5.50257500  | -2.83632100 | -1.35869400 |
| C | 3.53614200  | -4.28149200 | -1.44911700 |
| C | 1.33540500  | -3.47355500 | -0.78045300 |
| C | 6.24273900  | -3.80260000 | -1.99639700 |
| H | 5.96398300  | -1.88318700 | -1.10272200 |
| C | 4.33230500  | -5.27062600 | -2.08933600 |
| C | 2.13784000  | -4.46551700 | -1.28653200 |
| C | 5.65980300  | -5.04299700 | -2.35156900 |
| H | 7.28834100  | -3.60747300 | -2.23846600 |
| H | 3.85752600  | -6.20828400 | -2.38539500 |
| H | 1.68036900  | -5.39106900 | -1.64356900 |
| H | 6.26115900  | -5.80400100 | -2.85058000 |
| O | 1.15331600  | -1.37361600 | 0.34738900  |
| O | 2.28335100  | 0.49225700  | -0.82973000 |
| P | 0.81016400  | 0.04918000  | -0.33705000 |
| O | -0.15773600 | 0.04449500  | -1.44831100 |
| C | -0.15350100 | -3.54750500 | -0.87442600 |
| C | -0.95416000 | -3.97751600 | 0.20961700  |

|   |             |             |             |
|---|-------------|-------------|-------------|
| C | -0.74985400 | -3.18190100 | -2.10140400 |
| C | -2.33887500 | -4.03311400 | 0.03705800  |
| C | -2.14791600 | -3.23188200 | -2.19831900 |
| C | -2.96019300 | -3.65411900 | -1.15397800 |
| H | -2.95300100 | -4.39164500 | 0.86936400  |
| H | -2.61764600 | -2.92787400 | -3.13791800 |
| C | 3.18429000  | 2.88493200  | 0.39955700  |
| C | 2.64185200  | 3.49623100  | 1.55577200  |
| C | 3.01873600  | 3.48677700  | -0.86348200 |
| C | 1.97619300  | 4.71468000  | 1.39558500  |
| C | 2.34300700  | 4.70790500  | -0.96103800 |
| C | 1.82335800  | 5.34770100  | 0.16129900  |
| H | 1.54751600  | 5.19160400  | 2.28346700  |
| H | 2.22595600  | 5.16239700  | -1.94643400 |
| C | -0.41285000 | -4.46193600 | 1.55414700  |
| C | 0.41611900  | -3.44178200 | 2.34240800  |
| C | 0.32177100  | -5.80303600 | 1.44201500  |
| H | -1.31511600 | -4.65825900 | 2.15869200  |
| H | -0.03199400 | -2.43978800 | 2.30322700  |
| H | 0.48725800  | -3.76120800 | 3.39377000  |
| H | 1.44243600  | -3.36263500 | 1.95716000  |
| H | -0.28992600 | -6.54673000 | 0.91127100  |
| H | 1.27299700  | -5.68942200 | 0.90381200  |
| H | 0.55054300  | -6.19526400 | 2.44469500  |
| C | -0.03878300 | -2.85806200 | -3.42430400 |
| C | 0.12795100  | -4.15268700 | -4.23506100 |
| C | 1.27039000  | -2.06144000 | -3.45079000 |
| H | -0.76952300 | -2.23650800 | -3.96644900 |
| H | -0.81952500 | -4.70418700 | -4.31442000 |
| H | 0.48609400  | -3.92466700 | -5.25021300 |
| H | 0.86884400  | -4.81315300 | -3.75963600 |
| H | 1.21059900  | -1.14958100 | -2.84789700 |
| H | 2.14162900  | -2.65016800 | -3.13580100 |
| H | 1.45465400  | -1.75260800 | -4.49129700 |
| C | -4.46827100 | -3.67280900 | -1.30294200 |
| C | -5.09326800 | -2.56415000 | -0.45455900 |
| C | -5.07027700 | -5.04023800 | -0.97402700 |
| H | -4.68706000 | -3.44950500 | -2.35939800 |
| H | -4.64411100 | -1.59547500 | -0.71681900 |
| H | -6.18264800 | -2.50669200 | -0.60613600 |
| H | -4.90870600 | -2.75068400 | 0.61655900  |
| H | -4.61919500 | -5.83371800 | -1.58668400 |
| H | -4.91192600 | -5.29912600 | 0.08426800  |
| H | -6.15548200 | -5.03704400 | -1.15443700 |
| C | 2.72067100  | 2.99495700  | 3.00513300  |
| C | 3.89838200  | 3.64122200  | 3.74864300  |
| C | 2.67239900  | 1.48809100  | 3.28809200  |
| H | 1.80865400  | 3.40815700  | 3.46498900  |
| H | 3.83724900  | 3.41803400  | 4.82466400  |
| H | 4.85873300  | 3.24908000  | 3.38373500  |
| H | 3.90515900  | 4.73307000  | 3.61997100  |
| H | 1.94108900  | 0.97584900  | 2.65260400  |
| H | 3.64691400  | 0.99955300  | 3.16215000  |
| H | 2.37446300  | 1.34222200  | 4.33780900  |
| C | 3.60068300  | 2.88180500  | -2.13270600 |
| C | 4.74817000  | 3.74837000  | -2.66344100 |
| C | 2.52657200  | 2.66242400  | -3.20087700 |
| H | 4.02521900  | 1.89961300  | -1.88642000 |
| H | 5.53514400  | 3.87049900  | -1.90486600 |
| H | 5.19696500  | 3.29095700  | -3.55791300 |
| H | 4.38819200  | 4.75121900  | -2.94052500 |
| H | 1.69601000  | 2.05806800  | -2.81017000 |
| H | 2.11158200  | 3.62012600  | -3.55116700 |
| H | 2.95509400  | 2.14481900  | -4.07258500 |
| C | 1.14228000  | 6.70500100  | 0.10609700  |
| C | 0.67878600  | 7.10603800  | -1.29079800 |

|   |             |             |             |
|---|-------------|-------------|-------------|
| C | 2.06440100  | 7.77988600  | 0.69592500  |
| H | 0.25027700  | 6.63584600  | 0.75199800  |
| H | 0.04850200  | 6.32765300  | -1.74223200 |
| H | 0.10118300  | 8.04072700  | -1.24520100 |
| H | 1.53759900  | 7.28373700  | -1.95660800 |
| H | 2.36756300  | 7.53147100  | 1.72285700  |
| H | 2.97809100  | 7.86756500  | 0.08813300  |
| H | 1.56474100  | 8.76018100  | 0.71017400  |
| H | -0.38067800 | 1.32279100  | 1.03639500  |
| O | 0.52738400  | 0.95663800  | 0.91112300  |
| O | -2.85736000 | -0.23906800 | -1.89798900 |
| H | -1.94930300 | -0.51938300 | -1.64353200 |
| C | -2.92209700 | 1.08591800  | -1.76440700 |
| C | -4.44646500 | 3.85375500  | 0.17809600  |
| H | -5.53775800 | 3.73350700  | 0.08084100  |
| H | -4.16561800 | 3.58619800  | 1.20982500  |
| H | -4.20904800 | 4.91430000  | 0.02978700  |

**(P,R)-3a**

|   |             |             |             |
|---|-------------|-------------|-------------|
| C | 3.55652600  | 0.14213800  | 0.15019900  |
| C | 2.54669000  | -0.84677700 | 0.21984700  |
| C | 2.81818900  | -2.17987000 | 0.55164200  |
| C | 4.13564900  | -2.50271800 | 0.82856200  |
| C | 5.16078700  | -1.53185600 | 0.77988800  |
| C | 4.88582900  | -0.21925600 | 0.44117900  |
| C | 2.92604800  | 1.36873800  | -0.25353300 |
| H | 2.02592800  | -2.92799800 | 0.56672200  |
| H | 4.38989100  | -3.53316200 | 1.08072000  |
| H | 6.18563700  | -1.82961100 | 1.00381700  |
| H | 5.68142900  | 0.52540400  | 0.39170000  |
| H | 3.37998700  | 2.33618000  | -0.44951500 |
| C | 1.59798200  | 1.08939900  | -0.40304400 |
| N | 1.34732000  | -0.24115900 | -0.10225200 |
| C | -1.96905300 | -1.53344200 | 0.48929500  |
| C | -1.76611300 | -1.84611100 | -0.85304200 |
| C | -3.18589200 | -1.82449100 | 1.09888700  |
| C | -2.75213200 | -2.44287100 | -1.63123300 |
| C | -4.18483300 | -2.42060700 | 0.32631700  |
| H | -3.36387600 | -1.58601200 | 2.14944100  |
| C | -3.97440700 | -2.72670200 | -1.02467200 |
| H | -2.55635400 | -2.66967800 | -2.68037600 |
| H | -5.14850100 | -2.65283700 | 0.78260100  |
| H | -4.77490400 | -3.19134300 | -1.60164300 |
| N | 0.12692700  | -0.83087500 | -0.10961500 |
| C | -0.39364400 | -1.43419700 | -1.26181500 |
| O | 0.17860400  | -1.57270900 | -2.30361900 |
| C | -0.73124900 | -0.89998500 | 1.08045900  |
| H | -0.95655300 | 0.12047400  | 1.43343200  |
| C | -0.11981400 | -1.70193500 | 2.22436700  |
| H | 0.83815200  | -1.26280500 | 2.53745200  |
| H | -0.80035400 | -1.69102400 | 3.08736400  |
| H | 0.04436200  | -2.74566100 | 1.92274700  |
| S | 0.41802700  | 2.18818200  | -1.13774500 |
| O | -0.10191500 | 1.57268700  | -2.34742000 |
| O | 1.07981600  | 3.48331300  | -1.15775200 |
| C | -0.93093600 | 2.26710700  | 0.02504100  |
| C | -2.15373300 | 1.71251700  | -0.33877800 |
| C | -0.72861700 | 2.88531300  | 1.25835500  |
| C | -3.20206100 | 1.74991000  | 0.58128500  |
| H | -2.26112000 | 1.25047600  | -1.32199200 |
| C | -1.78046300 | 2.90862200  | 2.17026200  |
| H | 0.23967700  | 3.33355700  | 1.48972600  |
| C | -3.01142100 | 2.33720300  | 1.83205300  |
| H | -4.16588500 | 1.31025600  | 0.32083900  |
| H | -1.64553400 | 3.38017700  | 3.14444700  |
| H | -3.83216400 | 2.35984000  | 2.55071000  |

**(P,S)-3a**

|   |             |             |             |
|---|-------------|-------------|-------------|
| C | -1.31826700 | 2.89313000  | 0.12590200  |
| C | -0.05748600 | 2.48805100  | -0.36918800 |
| C | 0.80952500  | 3.35744300  | -1.04326300 |
| C | 0.37416900  | 4.65910200  | -1.22287300 |
| C | -0.88536800 | 5.08897800  | -0.74653800 |
| C | -1.73274100 | 4.22363200  | -0.07835700 |
| C | -1.90231100 | 1.75087800  | 0.76906300  |
| H | 1.77251700  | 3.00918400  | -1.41789500 |
| H | 1.01415600  | 5.36849900  | -1.74932400 |
| H | -1.19042200 | 6.12273400  | -0.91242600 |
| H | -2.70378800 | 4.56109400  | 0.28651100  |
| H | -2.87351900 | 1.68067500  | 1.25228700  |
| C | -1.00588900 | 0.72557800  | 0.64628800  |
| N | 0.11522200  | 1.15688100  | -0.05253700 |
| C | 3.31997200  | -0.43455800 | 0.33190500  |
| C | 2.78247200  | -1.11322400 | -0.75947100 |
| C | 4.56608900  | -0.79642400 | 0.83399700  |
| C | 3.44956000  | -2.16136200 | -1.38268700 |
| C | 5.24564200  | -1.84826600 | 0.21610600  |
| H | 5.00516600  | -0.27908200 | 1.68901700  |
| C | 4.69714500  | -2.52540800 | -0.88042000 |
| H | 2.99372000  | -2.67152900 | -2.23237000 |
| H | 6.22279000  | -2.15051900 | 0.59616000  |
| H | 5.25270900  | -3.34415700 | -1.33925900 |
| N | 1.29538000  | 0.50351000  | -0.19082400 |
| C | 1.45226500  | -0.54283500 | -1.09097100 |
| O | 0.65954300  | -0.86924000 | -1.93677900 |
| C | 2.37003900  | 0.64128900  | 0.80380100  |
| H | 2.83636100  | 1.63582200  | 0.68431300  |
| C | 1.88941800  | 0.47757800  | 2.24105400  |
| H | 2.73611200  | 0.61591900  | 2.92764900  |
| H | 1.13250500  | 1.23909200  | 2.48322400  |
| H | 1.45846700  | -0.52001400 | 2.39026500  |
| S | -1.27197600 | -0.93259800 | 1.23266800  |
| O | -1.81904200 | -0.80234400 | 2.57491000  |
| O | -0.05764200 | -1.70342800 | 0.98909200  |
| C | -2.56342400 | -1.56807100 | 0.18328400  |
| C | -3.83889700 | -1.70551100 | 0.72500000  |
| C | -2.25862000 | -1.94061100 | -1.12538300 |
| C | -4.85043200 | -2.22589400 | -0.08057300 |
| H | -4.01622000 | -1.41697300 | 1.76180400  |
| C | -3.28424300 | -2.45385000 | -1.91621300 |
| H | -1.24563900 | -1.81708900 | -1.51528700 |
| C | -4.57243200 | -2.59595000 | -1.39639800 |
| H | -5.85662400 | -2.34677200 | 0.32258400  |
| H | -3.07337000 | -2.74801800 | -2.94495100 |
| H | -5.36749900 | -3.00212700 | -2.02364400 |

**TS17***1Re-Ra-3Re*

|   |              |             |             |
|---|--------------|-------------|-------------|
| S | -6.25791300  | 1.19205000  | -0.99564200 |
| O | -5.80703800  | 0.39878600  | -2.13661300 |
| O | -6.11662100  | 2.64117000  | -0.99406000 |
| O | -1.62013300  | 2.36833600  | 1.22515600  |
| N | -4.13472800  | 0.46962100  | 0.51804100  |
| N | -3.36323000  | 1.10713800  | -0.40316700 |
| C | -7.97459400  | 0.81082800  | -0.71004400 |
| C | -8.46892600  | -0.42006000 | -1.13455400 |
| H | -7.80600000  | -1.11473700 | -1.65295200 |
| C | -9.80747300  | -0.71897400 | -0.89001000 |
| H | -10.21927700 | -1.67526200 | -1.21476800 |
| C | -10.62143200 | 0.20835900  | -0.23613400 |
| H | -11.66925100 | -0.03046800 | -0.04779400 |
| C | -10.10932300 | 1.44093400  | 0.17171600  |
| H | -10.75500000 | 2.16319900  | 0.67262700  |
| C | -8.77195100  | 1.75345000  | -0.06721900 |
| H | -8.34004900  | 2.71174800  | 0.22507700  |
| C | -5.51102700  | 0.50386700  | 0.45797700  |

|   |             |             |             |
|---|-------------|-------------|-------------|
| C | -6.07358800 | -0.12008300 | 1.53872700  |
| H | -7.13517400 | -0.25444600 | 1.72727700  |
| C | -4.97349700 | -0.56073400 | 2.34825200  |
| C | -3.77569000 | -0.18602600 | 1.68394500  |
| C | -2.50824100 | -0.46711300 | 2.21535500  |
| H | -1.59658600 | -0.18346000 | 1.69000700  |
| C | -2.47109100 | -1.10933100 | 3.44095300  |
| H | -1.50173500 | -1.32644400 | 3.88894200  |
| C | -3.64950700 | -1.49022000 | 4.12274100  |
| H | -3.56851100 | -1.99384600 | 5.08708100  |
| C | -4.89694500 | -1.22881300 | 3.58607300  |
| H | -5.80791600 | -1.52199200 | 4.11039400  |
| C | -2.73401400 | 0.36354500  | -1.42865600 |
| H | -3.47256600 | -0.04307900 | -2.13977700 |
| C | -1.76863200 | 1.34918100  | -2.04031000 |
| C | -1.08905400 | 1.16854300  | -3.24066400 |
| H | -1.34739300 | 0.33402800  | -3.89569200 |
| C | -0.04717700 | 2.03458300  | -3.57034200 |
| H | 0.49955700  | 1.89648500  | -4.50419400 |
| C | 0.32446200  | 3.05418900  | -2.69118600 |
| H | 1.16700600  | 3.70554200  | -2.93163800 |
| C | -0.37083100 | 3.24567500  | -1.49676600 |
| H | -0.07138200 | 4.03198400  | -0.80106700 |
| C | -1.43498600 | 2.40170200  | -1.18658400 |
| C | -2.25572200 | 2.53995600  | 0.06691200  |
| C | -3.23471900 | 3.67758300  | 0.12993600  |
| H | -3.89575000 | 3.52840500  | 0.99521500  |
| H | -3.84347000 | 3.72304000  | -0.77822800 |
| H | -2.67470300 | 4.61468500  | 0.27538400  |
| C | 2.60553100  | -2.24106000 | -0.03808000 |
| C | 3.90842300  | -1.92099100 | -0.35620800 |
| C | 4.64001800  | -2.83852600 | -1.19055100 |
| C | 4.05430000  | -4.09868400 | -1.50604700 |
| C | 2.72381900  | -4.38404300 | -1.09138200 |
| C | 1.96137500  | -3.45253500 | -0.43553700 |
| H | 6.35977100  | -1.55651300 | -1.53753400 |
| C | 5.91813200  | -2.53359700 | -1.73339800 |
| C | 4.78465700  | -5.02992300 | -2.29271100 |
| H | 2.28036000  | -5.34390600 | -1.36553500 |
| C | 6.02973500  | -4.71695000 | -2.78002600 |
| C | 6.59262700  | -3.44766800 | -2.50806300 |
| H | 4.32586400  | -5.99526500 | -2.51627600 |
| H | 6.57853000  | -5.43605100 | -3.38948300 |
| H | 7.56829700  | -3.18880000 | -2.92147500 |
| C | 4.50513800  | -0.65442600 | 0.15385000  |
| C | 5.76705400  | -0.64788000 | 0.84757400  |
| C | 3.84495100  | 0.55209200  | 0.00255200  |
| C | 6.43784600  | -1.84224500 | 1.23462100  |
| C | 6.36587000  | 0.59850300  | 1.19014300  |
| C | 4.39843800  | 1.80206400  | 0.40278400  |
| C | 7.65133200  | -1.79530600 | 1.87795600  |
| H | 5.97407200  | -2.80591100 | 1.02653300  |
| C | 7.63037800  | 0.61523900  | 1.83985700  |
| C | 5.66377200  | 1.80606700  | 0.93223000  |
| C | 8.26636700  | -0.55464700 | 2.17157600  |
| H | 8.14140700  | -2.72456700 | 2.17166100  |
| H | 8.07675700  | 1.58144600  | 2.08346000  |
| H | 6.12149300  | 2.75568800  | 1.21826700  |
| H | 9.23325900  | -0.53222000 | 2.67583700  |
| O | 2.61643400  | 0.60375800  | -0.62135900 |
| O | 1.87146000  | -1.35735700 | 0.73073600  |
| P | 1.27563300  | -0.05102700 | -0.01867000 |
| O | 0.48667800  | 0.75885600  | 0.93694500  |
| C | 3.56284300  | 3.03857700  | 0.32020500  |
| C | 3.49523500  | 3.80198100  | -0.86483300 |
| C | 2.82012200  | 3.42410100  | 1.46096200  |

|   |             |             |             |
|---|-------------|-------------|-------------|
| C | 2.67888300  | 4.94008200  | -0.88654700 |
| C | 1.99528900  | 4.54999400  | 1.36312300  |
| C | 1.90771800  | 5.32547000  | 0.20797900  |
| H | 2.64569000  | 5.53007800  | -1.80512100 |
| H | 1.39968300  | 4.83576500  | 2.23591800  |
| C | 0.51123700  | -3.63597600 | -0.12972000 |
| C | -0.46003400 | -3.68183700 | -1.14935900 |
| C | 0.11144600  | -3.68709500 | 1.23118600  |
| C | -1.81560100 | -3.74800900 | -0.76998700 |
| C | -1.24262700 | -3.72583000 | 1.54494900  |
| C | -2.23399700 | -3.73259800 | 0.55634900  |
| H | -2.56298400 | -3.77338900 | -1.56854900 |
| H | -1.55256000 | -3.73800000 | 2.59358100  |
| C | 4.31558100  | 3.53363000  | -2.12656500 |
| C | 4.17500800  | 2.14211400  | -2.75401400 |
| C | 5.79175700  | 3.90034700  | -1.92995000 |
| H | 3.91665800  | 4.24289900  | -2.87000500 |
| H | 3.12803400  | 1.81160100  | -2.78607100 |
| H | 4.56592700  | 2.17094400  | -3.78224400 |
| H | 4.75546700  | 1.38297900  | -2.21114000 |
| H | 5.89814500  | 4.91867700  | -1.52945200 |
| H | 6.28162600  | 3.20254300  | -1.23605800 |
| H | 6.32728600  | 3.84837600  | -2.88995500 |
| C | 2.92365300  | 2.81443800  | 2.86459200  |
| C | 4.05956200  | 3.50296200  | 3.63595800  |
| C | 3.01469500  | 1.29496200  | 3.04114600  |
| H | 1.98338000  | 3.11157900  | 3.35480600  |
| H | 3.96769000  | 4.59761100  | 3.59426900  |
| H | 4.04819900  | 3.19140400  | 4.69118900  |
| H | 5.03784100  | 3.22560700  | 3.21598400  |
| H | 2.24870200  | 0.77133200  | 2.45862300  |
| H | 4.00407100  | 0.88893900  | 2.79198600  |
| H | 2.83076700  | 1.06297000  | 4.10130900  |
| C | 1.01239300  | 6.55382600  | 0.19638700  |
| C | 0.63863500  | 7.03247800  | -1.20487300 |
| C | 1.66065100  | 7.69018900  | 0.99718400  |
| H | 0.08167600  | 6.26730300  | 0.71691900  |
| H | 0.21206700  | 6.22238100  | -1.81507100 |
| H | -0.10394500 | 7.84052300  | -1.14383500 |
| H | 1.51622100  | 7.43355900  | -1.73458900 |
| H | 1.88758500  | 7.37655000  | 2.02567400  |
| H | 2.60529300  | 7.99556700  | 0.52165100  |
| H | 0.99709400  | 8.56655700  | 1.04089700  |
| C | -0.24186400 | -3.70468400 | -2.66832600 |
| C | -0.36694400 | -5.14649000 | -3.18262700 |
| C | 0.98739900  | -3.03307400 | -3.29355300 |
| H | -1.11205200 | -3.15266400 | -3.06005700 |
| H | -0.33275200 | -5.16547700 | -4.28217200 |
| H | 0.46550000  | -5.76153500 | -2.80790300 |
| H | -1.30493900 | -5.61639900 | -2.85492300 |
| H | 1.25842600  | -2.09757200 | -2.79095500 |
| H | 1.86537300  | -3.69080500 | -3.30260900 |
| H | 0.75187100  | -2.80052700 | -4.34317700 |
| C | 1.12782100  | -3.77317800 | 2.36131400  |
| C | 1.18464000  | -5.20948500 | 2.89549000  |
| C | 0.85697100  | -2.77318000 | 3.48568700  |
| H | 2.12144200  | -3.54248100 | 1.95737200  |
| H | 1.43817500  | -5.91908600 | 2.09450900  |
| H | 1.94079000  | -5.29846400 | 3.68978200  |
| H | 0.21108500  | -5.50729800 | 3.31473900  |
| H | 0.74535600  | -1.75543500 | 3.08424600  |
| H | -0.05270200 | -3.03765900 | 4.04656300  |
| H | 1.69250900  | -2.77292500 | 4.20099100  |
| C | -3.69659900 | -3.76097900 | 0.96677000  |
| C | -4.12531400 | -5.19890900 | 1.28455800  |
| C | -4.64854500 | -3.13237200 | -0.05117300 |



|   |             |             |             |
|---|-------------|-------------|-------------|
| H | -3.76763200 | -3.17239100 | 1.89671500  |
| H | -3.47606100 | -5.64616000 | 2.05039100  |
| H | -5.16188700 | -5.22446000 | 1.65204000  |
| H | -4.06258200 | -5.82573700 | 0.38143000  |
| H | -4.37772700 | -2.09314800 | -0.30504100 |
| H | -4.69258000 | -3.71450400 | -0.98473900 |
| H | -5.66653600 | -3.09581700 | 0.36385000  |
| O | -1.90555700 | -0.72676800 | -0.97052900 |
| H | -2.40659700 | -1.47985100 | -0.62182700 |
| H | -0.82668400 | 1.79249000  | 1.11670100  |
| O | 0.57086700  | -0.53757600 | -1.31706700 |
| H | -0.43682000 | -0.67199700 | -1.19889200 |

**TS18***ISI-Ra-3Si*

|   |             |             |             |
|---|-------------|-------------|-------------|
| S | -2.41524900 | -0.92550700 | 1.85842600  |
| O | -1.89634200 | 0.20748600  | 2.61447000  |
| O | -1.67999100 | -1.48299400 | 0.72537400  |
| O | -2.49024100 | -0.95128500 | -2.08919400 |
| N | -4.20484100 | 0.54583500  | 0.44187900  |
| N | -3.18457700 | 0.91619000  | -0.38141600 |
| C | -2.72212700 | -2.24907300 | 3.00761400  |
| C | -2.94462500 | -1.94028000 | 4.34721500  |
| H | -2.93053000 | -0.89767500 | 4.66868600  |
| C | -3.16309700 | -2.98758500 | 5.24026000  |
| H | -3.33877900 | -2.77400800 | 6.29526600  |
| C | -3.14368500 | -4.30852300 | 4.78719700  |
| H | -3.31025600 | -5.12368600 | 5.49307500  |
| C | -2.90264000 | -4.59603200 | 3.44262300  |
| H | -2.87521300 | -5.63120800 | 3.09882600  |
| C | -2.68735400 | -3.55791100 | 2.53817700  |
| H | -2.47363300 | -3.73455100 | 1.48304900  |
| C | -4.06164700 | -0.46462500 | 1.36722200  |
| C | -5.26392000 | -0.78148700 | 1.94171800  |
| H | -5.43157000 | -1.52203100 | 2.71869900  |
| C | -6.22988500 | 0.09291300  | 1.33782500  |
| C | -5.53785100 | 0.90883600  | 0.40668000  |
| C | -6.19219400 | 1.89354600  | -0.35026500 |
| H | -5.65067400 | 2.51579100  | -1.06386500 |
| C | -7.55515000 | 2.04318200  | -0.15907000 |
| H | -8.09326500 | 2.80120700  | -0.73001000 |
| C | -8.26397300 | 1.23855200  | 0.76045300  |
| H | -9.33716600 | 1.38911000  | 0.88256600  |
| C | -7.61657300 | 0.26977700  | 1.50598400  |
| H | -8.16649800 | -0.34813800 | 2.21753000  |
| C | -2.80341500 | 2.28320900  | -0.44385700 |
| H | -3.61265800 | 2.97094400  | -0.13575900 |
| C | -2.37963400 | 2.50825900  | -1.88009700 |
| C | -1.82343400 | 3.68837800  | -2.36804900 |
| H | -1.72972600 | 4.56249200  | -1.71915800 |
| C | -1.37515600 | 3.74016600  | -3.68650300 |
| H | -0.93764900 | 4.66068900  | -4.07820900 |
| C | -1.46813200 | 2.61180300  | -4.50522900 |
| H | -1.09715200 | 2.65320600  | -5.53024000 |
| C | -2.03016300 | 1.43353400  | -4.01737300 |
| H | -2.09659100 | 0.54339300  | -4.64624500 |
| C | -2.50361900 | 1.39514900  | -2.70692300 |
| C | -3.16728300 | 0.18802500  | -2.10478300 |
| C | -4.59869700 | -0.06219400 | -2.49773900 |
| H | -4.58963800 | -0.56582200 | -3.47624400 |
| H | -5.17641900 | 0.86362000  | -2.57506900 |
| H | -5.07005900 | -0.73813800 | -1.76942900 |
| C | 3.00677200  | 1.06166300  | 0.31262800  |
| C | 3.82650100  | 0.01300500  | 0.68411600  |
| C | 4.73907900  | 0.22161800  | 1.77701400  |
| C | 4.88303400  | 1.53285400  | 2.31439200  |
| C | 4.03687200  | 2.57669200  | 1.85324800  |
| C | 3.05072100  | 2.34781300  | 0.92698700  |

|   |             |             |             |
|---|-------------|-------------|-------------|
| H | 5.35760700  | -1.85021200 | 1.99857600  |
| C | 5.49239200  | -0.83253500 | 2.36420900  |
| C | 5.81548900  | 1.76129000  | 3.36265200  |
| H | 4.12629400  | 3.56736000  | 2.30480900  |
| C | 6.55168300  | 0.72808600  | 3.88716900  |
| C | 6.37280200  | -0.58511200 | 3.39043100  |
| H | 5.91942900  | 2.77508900  | 3.75490100  |
| H | 7.25884500  | 0.91177700  | 4.69711700  |
| H | 6.93333300  | -1.41092100 | 3.83064500  |
| C | 3.72476000  | -1.28954600 | -0.02930900 |
| C | 4.88282100  | -1.95280100 | -0.56835900 |
| C | 2.48867700  | -1.87757500 | -0.23020600 |
| C | 6.17342900  | -1.35241200 | -0.59249200 |
| C | 4.73850000  | -3.25468600 | -1.12969200 |
| C | 2.31707000  | -3.13157100 | -0.88556600 |
| C | 7.25962900  | -2.02844300 | -1.09403400 |
| H | 6.29563200  | -0.33740800 | -0.21581200 |
| C | 5.88425500  | -3.93627100 | -1.62438200 |
| C | 3.44242700  | -3.82127200 | -1.25944000 |
| C | 7.12139800  | -3.34287600 | -1.60123100 |
| H | 8.23664300  | -1.54336400 | -1.10792300 |
| H | 5.75343600  | -4.93750900 | -2.03994700 |
| H | 3.33795600  | -4.80118200 | -1.73045400 |
| H | 7.99319400  | -3.87123700 | -1.98930500 |
| O | 1.34946900  | -1.27278500 | 0.25364300  |
| O | 2.10563800  | 0.88271200  | -0.71542400 |
| P | 0.73389500  | 0.07223700  | -0.38311700 |
| O | -0.07084400 | -0.04924800 | -1.61955300 |
| C | 0.93290600  | -3.55408800 | -1.25602700 |
| C | 0.09342000  | -4.24243800 | -0.35279800 |
| C | 0.44610800  | -3.15661500 | -2.52273000 |
| C | -1.23387200 | -4.47262800 | -0.72163800 |
| C | -0.90687900 | -3.37542200 | -2.80811100 |
| C | -1.77338000 | -3.99259500 | -1.91311300 |
| H | -1.87643300 | -5.02557400 | -0.03082400 |
| H | -1.30664700 | -3.01377800 | -3.75949000 |
| C | 2.04174500  | 3.39763600  | 0.59564900  |
| C | 1.12414300  | 3.84497200  | 1.57657600  |
| C | 2.01796600  | 3.96379400  | -0.69872900 |
| C | 0.25057700  | 4.88614600  | 1.22872100  |
| C | 1.13502700  | 5.01106900  | -0.98055000 |
| C | 0.25148600  | 5.50667300  | -0.02247500 |
| H | -0.46310000 | 5.22727900  | 1.98583700  |
| H | 1.15227400  | 5.44699100  | -1.98098500 |
| C | 0.52515700  | -4.76026200 | 1.01722700  |
| C | 0.88506700  | -3.66099800 | 2.02436900  |
| C | 1.61406000  | -5.83598700 | 0.94786100  |
| H | -0.37368100 | -5.25750600 | 1.41879000  |
| H | 0.17228800  | -2.82690100 | 1.97093500  |
| H | 0.87594600  | -4.07803400 | 3.04330100  |
| H | 1.89157200  | -3.25624600 | 1.84398800  |
| H | 1.34599500  | -6.62843700 | 0.23387200  |
| H | 2.57994700  | -5.40902600 | 0.64527000  |
| H | 1.75120100  | -6.29661000 | 1.93805000  |
| C | 1.27375300  | -2.59039100 | -3.68387800 |
| C | 1.92897500  | -3.74338400 | -4.45824500 |
| C | 2.29360000  | -1.47262700 | -3.43684700 |
| H | 0.51955100  | -2.15056700 | -4.35532200 |
| H | 1.19500000  | -4.52008700 | -4.71607500 |
| H | 2.38463500  | -3.37014300 | -5.38802700 |
| H | 2.72547300  | -4.21058000 | -3.86056200 |
| H | 1.86597000  | -0.65331000 | -2.84819200 |
| H | 3.21410300  | -1.82472900 | -2.95291700 |
| H | 2.58613300  | -1.05628000 | -4.41335300 |
| C | -3.25391300 | -4.11188400 | -2.21487700 |
| C | -4.10218900 | -3.62885400 | -1.03411600 |

|   |             |             |             |
|---|-------------|-------------|-------------|
| C | -3.63099200 | -5.53732900 | -2.62801500 |
| H | -3.45200500 | -3.43747200 | -3.06331000 |
| H | -3.73220400 | -2.65694600 | -0.67475900 |
| H | -5.15853100 | -3.52782300 | -1.32735500 |
| H | -4.06718200 | -4.34783700 | -0.19942300 |
| H | -3.05745400 | -5.86176600 | -3.50793000 |
| H | -3.41881900 | -6.24349100 | -1.80985400 |
| H | -4.70324800 | -5.60732400 | -2.86617200 |
| C | 0.95975200  | 3.36417000  | 3.02756900  |
| C | 1.53945900  | 4.41445100  | 3.98788500  |
| C | 1.42189300  | 1.96782200  | 3.45948600  |
| H | -0.13379400 | 3.36614900  | 3.16786900  |
| H | 1.30986600  | 4.14369700  | 5.02902400  |
| H | 2.63482100  | 4.46328600  | 3.88828300  |
| H | 1.13922800  | 5.41993000  | 3.79426900  |
| H | 1.19608000  | 1.19991400  | 2.71305800  |
| H | 2.49250100  | 1.93547700  | 3.69820200  |
| H | 0.87534500  | 1.70435000  | 4.37707800  |
| C | 2.95661900  | 3.51579400  | -1.80966400 |
| C | 3.94142800  | 4.63106200  | -2.17700600 |
| C | 2.17340500  | 3.03284100  | -3.03471100 |
| H | 3.55158700  | 2.67002200  | -1.44511000 |
| H | 4.52515100  | 4.94821100  | -1.30065500 |
| H | 4.64171500  | 4.28436700  | -2.95133400 |
| H | 3.41507100  | 5.51424800  | -2.57084400 |
| H | 1.42743500  | 2.27449600  | -2.75588700 |
| H | 1.64767000  | 3.86798900  | -3.52439700 |
| H | 2.85720300  | 2.59063300  | -3.77470000 |
| C | -0.67099900 | 6.69307000  | -0.27198600 |
| C | -0.64809000 | 7.20471000  | -1.71034900 |
| C | -0.33359400 | 7.84066000  | 0.68928200  |
| H | -1.70015200 | 6.35975600  | -0.04185500 |
| H | -0.90279600 | 6.42312800  | -2.44027400 |
| H | -1.36912000 | 8.02502700  | -1.83125300 |
| H | 0.34829300  | 7.59442200  | -1.96857000 |
| H | -0.39074800 | 7.52446800  | 1.73949200  |
| H | 0.68970400  | 8.19914800  | 0.50071700  |
| H | -1.02629100 | 8.68298000  | 0.54696600  |
| O | -1.70426100 | 2.51290400  | 0.45131900  |
| H | -1.21987900 | 3.32385500  | 0.22247200  |
| H | -1.54157900 | -0.78160100 | -1.85009000 |
| O | 0.12196400  | 0.76719800  | 0.85924700  |
| H | -0.69482300 | 1.35370100  | 0.72574100  |

**TS19***IS-Ra-3R*

|   |              |             |             |
|---|--------------|-------------|-------------|
| S | -5.93605600  | 0.42414100  | -1.39530000 |
| O | -5.73069400  | -0.87186400 | -2.04066900 |
| O | -5.45775500  | 1.63001100  | -2.06817600 |
| N | -3.79857100  | 0.21524900  | 0.29313200  |
| N | -2.87991700  | 0.65427200  | -0.61418700 |
| C | -7.65542100  | 0.60457700  | -1.00844200 |
| C | -8.44175800  | -0.54195500 | -0.92142800 |
| H | -7.99417800  | -1.51916300 | -1.10892500 |
| C | -9.79084400  | -0.39509600 | -0.60541400 |
| H | -10.42992700 | -1.27563100 | -0.53286100 |
| C | -10.32277700 | 0.87745400  | -0.39025500 |
| H | -11.38017000 | 0.98574500  | -0.14462900 |
| C | -9.51831100  | 2.01396400  | -0.49417500 |
| H | -9.94622900  | 3.00420800  | -0.33512500 |
| C | -8.16785600  | 1.88458700  | -0.80949200 |
| H | -7.51677800  | 2.75377600  | -0.91346700 |
| C | -5.18159400  | 0.32647700  | 0.20108700  |
| C | -5.75509600  | 0.03491800  | 1.40799600  |
| H | -6.82275200  | -0.01277400 | 1.60773300  |
| C | -4.67909100  | -0.25022800 | 2.31939800  |
| C | -3.47484800  | -0.15172700 | 1.58956800  |
| C | -2.21593800  | -0.41342800 | 2.13652400  |

|   |             |             |             |
|---|-------------|-------------|-------------|
| H | -1.31868200 | -0.37007900 | 1.52114000  |
| C | -2.19162300 | -0.75899200 | 3.47647700  |
| H | -1.23013400 | -0.97809500 | 3.94205100  |
| C | -3.37725500 | -0.84806800 | 4.24229000  |
| H | -3.30811600 | -1.12697300 | 5.29454200  |
| C | -4.61850900 | -0.60855600 | 3.68079400  |
| H | -5.53090900 | -0.69839700 | 4.27176400  |
| C | -2.59279200 | -0.13708000 | -1.85182300 |
| H | -3.53082600 | -0.09815200 | -2.43395500 |
| C | -1.62223200 | 0.78864900  | -2.52566200 |
| C | -0.87118700 | 0.58979700  | -3.67497800 |
| H | -0.85406000 | -0.38233600 | -4.16698900 |
| C | -0.12243900 | 1.66178600  | -4.15825300 |
| H | 0.49224100  | 1.52858100  | -5.04976000 |
| C | -0.13607800 | 2.90818200  | -3.51750900 |
| H | 0.46159800  | 3.72688300  | -3.92040700 |
| C | -0.89081000 | 3.10385200  | -2.36453800 |
| H | -0.88758200 | 4.06699800  | -1.84924600 |
| C | -1.62826700 | 2.02467800  | -1.88115800 |
| C | -2.45346300 | 1.93178900  | -0.66204800 |
| C | -3.32933000 | 3.01821900  | -0.13694100 |
| H | -3.62162900 | 2.80902500  | 0.89989900  |
| H | -4.21934100 | 3.04161100  | -0.78395400 |
| H | -2.81370900 | 3.98113300  | -0.17827600 |
| C | 2.69139600  | -2.02698000 | -0.06251900 |
| C | 3.88679800  | -1.56805700 | -0.58962700 |
| C | 4.57543100  | -2.40871400 | -1.53282400 |
| C | 4.12454300  | -3.74656500 | -1.72373100 |
| C | 2.93349900  | -4.18268100 | -1.08278700 |
| C | 2.16217900  | -3.32391100 | -0.34074100 |
| H | 6.01597000  | -0.92425100 | -2.19614900 |
| C | 5.68782000  | -1.95889000 | -2.29707900 |
| C | 4.83393300  | -4.60409100 | -2.60828900 |
| H | 2.59206000  | -5.20673000 | -1.24214600 |
| C | 5.92276400  | -4.14860200 | -3.30986100 |
| C | 6.34108800  | -2.80437400 | -3.16200200 |
| H | 4.48014800  | -5.62991700 | -2.73258100 |
| H | 6.45444200  | -4.81225800 | -3.99316300 |
| H | 7.18619900  | -2.43360800 | -3.74385500 |
| C | 4.42280400  | -0.24591900 | -0.16311600 |
| C | 5.78142900  | -0.08898700 | 0.29237300  |
| C | 3.59667300  | 0.86486800  | -0.13850100 |
| C | 6.65860900  | -1.19050100 | 0.50270400  |
| C | 6.27434800  | 1.21778200  | 0.57854200  |
| C | 4.04977900  | 2.15332300  | 0.27494000  |
| C | 7.95750200  | -0.99763200 | 0.90930300  |
| H | 6.28745900  | -2.20292200 | 0.34937500  |
| C | 7.62750200  | 1.38784800  | 0.97891200  |
| C | 5.38136800  | 2.32355300  | 0.55064600  |
| C | 8.45890800  | 0.30656300  | 1.13278500  |
| H | 8.60477600  | -1.86109800 | 1.06954200  |
| H | 7.98568800  | 2.39956400  | 1.18100900  |
| H | 5.75336700  | 3.31074600  | 0.83497400  |
| H | 9.49388200  | 0.44676600  | 1.44755200  |
| O | 2.30701000  | 0.78170700  | -0.57087300 |
| O | 1.99790400  | -1.24932300 | 0.82358600  |
| P | 1.11375400  | 0.01654800  | 0.26571700  |
| O | 0.72602300  | 0.79903300  | 1.50472300  |
| C | 3.03371000  | 3.22030500  | 0.51900700  |
| C | 2.53312200  | 4.02925100  | -0.52670600 |
| C | 2.55614900  | 3.38276700  | 1.83854800  |
| C | 1.56209600  | 4.99272600  | -0.22716600 |
| C | 1.58534100  | 4.36611500  | 2.07452200  |
| C | 1.08540700  | 5.19041900  | 1.07185300  |
| H | 1.20683800  | 5.63704700  | -1.03752500 |
| H | 1.22408300  | 4.50451400  | 3.09782800  |

|   |             |             |             |
|---|-------------|-------------|-------------|
| C | 0.80028700  | -3.70176300 | 0.14137800  |
| C | -0.24200500 | -3.92801300 | -0.78421900 |
| C | 0.55441300  | -3.82841000 | 1.52865700  |
| C | -1.49145800 | -4.32106600 | -0.28302000 |
| C | -0.71409500 | -4.20727200 | 1.96794700  |
| C | -1.75318200 | -4.47346900 | 1.07426300  |
| H | -2.29873600 | -4.51523400 | -0.99769500 |
| H | -0.89073300 | -4.31271300 | 3.04245300  |
| C | 3.09288600  | 4.05349900  | -1.94868300 |
| C | 3.24485700  | 2.71947500  | -2.68622100 |
| C | 4.41353400  | 4.83510400  | -1.97356600 |
| H | 2.36257500  | 4.64591100  | -2.52511400 |
| H | 2.36889900  | 2.07294200  | -2.55493000 |
| H | 3.37901800  | 2.92221300  | -3.76056000 |
| H | 4.13159500  | 2.16451800  | -2.34967200 |
| H | 4.29748200  | 5.83082000  | -1.52210900 |
| H | 5.18972200  | 4.29158600  | -1.41483200 |
| H | 4.76729300  | 4.95922300  | -3.00830000 |
| C | 3.08002700  | 2.68976000  | 3.10356200  |
| C | 4.21809600  | 3.52930800  | 3.70438000  |
| C | 3.47684800  | 1.20967100  | 3.08126400  |
| H | 2.23302100  | 2.75378000  | 3.80452200  |
| H | 3.92895700  | 4.58420400  | 3.81731000  |
| H | 4.49944800  | 3.13655200  | 4.69299100  |
| H | 5.11018300  | 3.48622500  | 3.06184400  |
| H | 2.71616000  | 0.59222200  | 2.59240000  |
| H | 4.45106600  | 1.03245000  | 2.60727800  |
| H | 3.56277100  | 0.87030900  | 4.12528600  |
| C | 0.06453800  | 6.26469300  | 1.40053800  |
| C | -1.33575700 | 5.83475000  | 0.96097800  |
| C | 0.43528500  | 7.62840900  | 0.81584100  |
| H | 0.05151200  | 6.36019400  | 2.49811600  |
| H | -1.59155700 | 4.85719100  | 1.39425800  |
| H | -2.09662700 | 6.56773400  | 1.26935800  |
| H | -1.37897900 | 5.75358200  | -0.13901100 |
| H | 1.44528000  | 7.93176800  | 1.12494100  |
| H | 0.40901800  | 7.61155900  | -0.28433200 |
| H | -0.27597700 | 8.39774500  | 1.15075300  |
| C | -0.16843900 | -3.80676100 | -2.31084400 |
| C | 0.18895500  | -5.13901200 | -2.98402600 |
| C | 0.64465000  | -2.64807700 | -2.89494800 |
| H | -1.21020300 | -3.59331700 | -2.59511500 |
| H | 0.00532400  | -5.07282400 | -4.06738200 |
| H | 1.25086400  | -5.38647700 | -2.84792400 |
| H | -0.41188500 | -5.96825200 | -2.58249700 |
| H | 0.45537300  | -1.72182100 | -2.33501200 |
| H | 1.72476400  | -2.84578900 | -2.90761500 |
| H | 0.33726200  | -2.50460100 | -3.94402100 |
| C | 1.64356500  | -3.62430900 | 2.57268100  |
| C | 1.98331000  | -4.94935000 | 3.26427400  |
| C | 1.26080900  | -2.54654200 | 3.59102400  |
| H | 2.55418700  | -3.28343300 | 2.06450400  |
| H | 2.29454600  | -5.70790600 | 2.53138800  |
| H | 2.80149800  | -4.80992200 | 3.98678100  |
| H | 1.11332900  | -5.34574900 | 3.81055100  |
| H | 1.01144000  | -1.60332500 | 3.08371300  |
| H | 0.39944500  | -2.86564800 | 4.19999200  |
| H | 2.09902800  | -2.35513700 | 4.27794000  |
| C | -3.11484000 | -4.92961300 | 1.56312700  |
| C | -3.75725900 | -3.89788800 | 2.49187700  |
| C | -3.02719200 | -6.30084200 | 2.24006200  |
| H | -3.75777900 | -5.03363000 | 0.67325300  |
| H | -3.82533000 | -2.91253300 | 2.00794100  |
| H | -4.76956300 | -4.21276400 | 2.78888600  |
| H | -3.16275100 | -3.77144200 | 3.40988000  |
| H | -2.58948900 | -7.04915200 | 1.56444500  |

|   |             |             |             |
|---|-------------|-------------|-------------|
| H | -2.39464200 | -6.24922200 | 3.13968400  |
| H | -4.02428300 | -6.64981100 | 2.54851400  |
| O | -2.21986600 | -1.43084800 | -1.64072500 |
| H | -3.01536700 | -1.97789300 | -1.61225400 |
| O | 0.05101000  | -0.34927300 | -0.69843100 |
| O | -1.08510700 | 2.30845500  | 0.72187300  |
| H | -0.39596300 | 1.61306500  | 1.11135900  |
| H | -0.49020700 | 2.99007900  | 0.36441500  |

**TS20***IR-Ra-3S*

|   |             |             |             |
|---|-------------|-------------|-------------|
| S | -2.83696200 | 0.27872500  | 2.16516600  |
| O | -2.27628000 | 0.59079700  | 3.46546400  |
| O | -2.00870700 | 0.00028800  | 1.00383300  |
| N | -4.02187300 | 2.24221300  | 0.50115300  |
| N | -2.99228300 | 2.29216300  | -0.38791800 |
| C | -3.96056800 | -1.08993600 | 2.38471200  |
| C | -4.13237600 | -1.60850300 | 3.66412200  |
| H | -3.56414500 | -1.18380600 | 4.49296100  |
| C | -5.02557400 | -2.66496000 | 3.83963900  |
| H | -5.17053400 | -3.09465100 | 4.83152400  |
| C | -5.73709800 | -3.16338600 | 2.74854600  |
| H | -6.44605500 | -3.98030500 | 2.89057800  |
| C | -5.54357100 | -2.62981300 | 1.47232100  |
| H | -6.09839500 | -3.04084100 | 0.62686300  |
| C | -4.63239500 | -1.59446600 | 1.27374400  |
| H | -4.41776100 | -1.19143000 | 0.27846000  |
| C | -3.96120700 | 1.59957100  | 1.73937900  |
| C | -4.92340800 | 2.09185300  | 2.56838200  |
| H | -5.12331200 | 1.73688100  | 3.57630300  |
| C | -5.59909200 | 3.14200500  | 1.85541600  |
| C | -4.98005000 | 3.24666300  | 0.59106400  |
| C | -5.31111500 | 4.24660600  | -0.32931400 |
| H | -4.77551500 | 4.35329900  | -1.27333300 |
| C | -6.33089200 | 5.11725800  | 0.02505700  |
| H | -6.61643400 | 5.91266700  | -0.66442100 |
| C | -6.99983100 | 5.00068400  | 1.26088800  |
| H | -7.80057500 | 5.70112200  | 1.49997600  |
| C | -6.64101100 | 4.02853800  | 2.17990000  |
| H | -7.14326700 | 3.95847500  | 3.14554600  |
| C | -1.77170200 | 3.11561400  | -0.02081300 |
| H | -2.16826700 | 4.14985400  | 0.02651500  |
| C | -0.98349900 | 2.93540400  | -1.29613500 |
| C | 0.32316500  | 3.31106800  | -1.57374100 |
| H | 0.96331500  | 3.75168500  | -0.80621500 |
| C | 0.80808100  | 3.06653600  | -2.85940500 |
| H | 1.83412900  | 3.34828900  | -3.09599500 |
| C | 0.01336500  | 2.45903500  | -3.83867100 |
| H | 0.42942100  | 2.27582400  | -4.83008100 |
| C | -1.28590700 | 2.05596700  | -3.54704200 |
| H | -1.89310200 | 1.53977700  | -4.29345400 |
| C | -1.76490300 | 2.30085000  | -2.26344100 |
| C | -3.01996500 | 1.83235400  | -1.64127100 |
| C | -4.31321600 | 1.62405400  | -2.35838900 |
| H | -4.16001500 | 1.03266500  | -3.26773000 |
| H | -4.71802500 | 2.60417300  | -2.64781300 |
| H | -5.03635800 | 1.11992600  | -1.70523500 |
| C | 3.23263100  | -0.15861700 | 0.47276000  |
| C | 3.41379600  | -1.41838700 | 1.01853300  |
| C | 4.29115700  | -1.55927600 | 2.14769000  |
| C | 5.07681300  | -0.44462000 | 2.55527400  |
| C | 4.90792600  | 0.80300500  | 1.89859900  |
| C | 3.95775400  | 0.98486500  | 0.92505400  |
| H | 3.77063500  | -3.61564700 | 2.61640200  |
| C | 4.39657800  | -2.76678000 | 2.89249900  |
| C | 5.97664100  | -0.58437100 | 3.64677500  |
| H | 5.50756300  | 1.65640000  | 2.22352300  |
| C | 6.07407600  | -1.77062700 | 4.33109000  |

|   |             |             |             |
|---|-------------|-------------|-------------|
| C | 5.26277800  | -2.86819200 | 3.95485500  |
| H | 6.57723800  | 0.27934200  | 3.93995300  |
| H | 6.76150900  | -1.86566300 | 5.17277400  |
| H | 5.32023500  | -3.80102400 | 4.51763400  |
| C | 2.71377400  | -2.57794800 | 0.40538400  |
| C | 3.43329600  | -3.74827100 | -0.01997600 |
| C | 1.35418600  | -2.49607700 | 0.14977700  |
| C | 4.85268200  | -3.85490700 | 0.03840500  |
| C | 2.70482200  | -4.84940000 | -0.55401900 |
| C | 0.64829400  | -3.53308000 | -0.53159800 |
| C | 5.49329400  | -5.00696900 | -0.35021200 |
| H | 5.43751700  | -3.00539100 | 0.38841600  |
| C | 3.39263200  | -6.03526000 | -0.93146700 |
| C | 1.31393100  | -4.70571700 | -0.79411300 |
| C | 4.75797400  | -6.12028800 | -0.82414200 |
| H | 6.58180000  | -5.06011400 | -0.29970900 |
| H | 2.81028100  | -6.87050300 | -1.32662900 |
| H | 0.77630800  | -5.52566300 | -1.27633800 |
| H | 5.27929700  | -7.03120200 | -1.12149000 |
| O | 0.65347200  | -1.40907100 | 0.58646800  |
| O | 2.35099000  | 0.00431700  | -0.56928800 |
| P | 0.75212000  | 0.05046300  | -0.15830100 |
| O | -0.06115100 | 0.01684700  | -1.42128400 |
| C | -0.72000300 | -3.33144500 | -1.10610400 |
| C | -1.89630900 | -3.57002200 | -0.35592100 |
| C | -0.81013900 | -3.01315300 | -2.48175600 |
| C | -3.13233600 | -3.50309000 | -1.00641900 |
| C | -2.08470400 | -2.93293800 | -3.06723900 |
| C | -3.25445900 | -3.18769100 | -2.35935500 |
| H | -4.02855900 | -3.73443700 | -0.42672700 |
| H | -2.15114800 | -2.70810900 | -4.13727000 |
| C | 3.71490900  | 2.33532400  | 0.33942500  |
| C | 3.20127900  | 3.38860600  | 1.12600100  |
| C | 4.06931600  | 2.56732800  | -1.01207000 |
| C | 3.07277100  | 4.65298900  | 0.52664400  |
| C | 3.93476200  | 3.84891700  | -1.54601200 |
| C | 3.43888800  | 4.91391400  | -0.78976100 |
| H | 2.66849800  | 5.47181700  | 1.13036200  |
| H | 4.24367100  | 4.02342600  | -2.58164100 |
| C | -1.92986800 | -4.04804700 | 1.09564000  |
| C | -1.11363400 | -3.24839100 | 2.11378800  |
| C | -1.59460400 | -5.54323300 | 1.17970800  |
| H | -2.98454500 | -3.94272200 | 1.39996700  |
| H | -1.23162000 | -2.16697300 | 1.97392200  |
| H | -1.44990700 | -3.51800600 | 3.12704200  |
| H | -0.04038700 | -3.47687400 | 2.05499600  |
| H | -2.22574900 | -6.13384000 | 0.49959000  |
| H | -0.54179300 | -5.72180700 | 0.91734000  |
| H | -1.75210300 | -5.90968400 | 2.20537800  |
| C | 0.34256400  | -2.87422200 | -3.48785200 |
| C | 0.61924100  | -4.22899900 | -4.15850900 |
| C | 1.65773800  | -2.21300500 | -3.07135300 |
| H | -0.07643600 | -2.22136300 | -4.27113100 |
| H | -0.30545100 | -4.69940500 | -4.52318800 |
| H | 1.30152600  | -4.09467300 | -5.01130000 |
| H | 1.10308800  | -4.92037200 | -3.45358900 |
| H | 1.48280600  | -1.27116700 | -2.54161500 |
| H | 2.28955600  | -2.86454700 | -2.45307400 |
| H | 2.22896300  | -1.98706400 | -3.98532600 |
| C | -4.60889500 | -3.15135700 | -3.04212800 |
| C | -5.51605600 | -2.08080500 | -2.43196000 |
| C | -5.28793600 | -4.52309600 | -3.01313500 |
| H | -4.43140500 | -2.88472100 | -4.09733600 |
| H | -5.02172300 | -1.09967300 | -2.42369400 |
| H | -6.46117300 | -1.99425100 | -2.98833200 |
| H | -5.76311500 | -2.33145800 | -1.38916200 |

|   |             |             |             |
|---|-------------|-------------|-------------|
| H | -4.64897200 | -5.28970000 | -3.47273000 |
| H | -5.49211100 | -4.83337800 | -1.97659200 |
| H | -6.24614000 | -4.49759400 | -3.55322500 |
| C | 2.78603200  | 3.35738600  | 2.60428300  |
| C | 3.84861800  | 4.06781300  | 3.45709200  |
| C | 2.38057300  | 2.04073800  | 3.27515700  |
| H | 1.88330600  | 3.98977700  | 2.62576500  |
| H | 3.49964000  | 4.16230400  | 4.49621700  |
| H | 4.78318700  | 3.48589900  | 3.46977600  |
| H | 4.08315900  | 5.07216200  | 3.07653100  |
| H | 1.78149400  | 1.40663200  | 2.61251800  |
| H | 3.24678400  | 1.46985000  | 3.63394900  |
| H | 1.76658900  | 2.28427500  | 4.15535800  |
| C | 4.67481300  | 1.48308200  | -1.89484700 |
| C | 6.12975800  | 1.81867700  | -2.24045700 |
| C | 3.84144900  | 1.23768300  | -3.15494500 |
| H | 4.68816700  | 0.54165500  | -1.33249100 |
| H | 6.72859200  | 1.95764600  | -1.32866900 |
| H | 6.58243500  | 1.00851400  | -2.83151100 |
| H | 6.19566900  | 2.74527000  | -2.83165800 |
| H | 2.80661300  | 0.97979300  | -2.88870300 |
| H | 3.83323900  | 2.12510300  | -3.80971500 |
| H | 4.26612100  | 0.40466900  | -3.73523600 |
| C | 3.33382400  | 6.31206600  | -1.37087600 |
| C | 2.45779200  | 6.35323200  | -2.62511700 |
| C | 4.72394700  | 6.89013600  | -1.65437000 |
| H | 2.85542700  | 6.94312800  | -0.60422700 |
| H | 1.45101400  | 5.95992500  | -2.42370100 |
| H | 2.35874600  | 7.38426100  | -2.99625600 |
| H | 2.90037400  | 5.75140600  | -3.43475000 |
| H | 5.34493800  | 6.88757300  | -0.74770600 |
| H | 5.24381100  | 6.29292000  | -2.41946900 |
| H | 4.65054200  | 7.92385700  | -2.02425500 |
| O | -1.24425200 | 2.80465800  | 1.17276300  |
| H | -0.54436300 | 2.06435900  | 1.08250700  |
| O | 0.57923500  | 1.13303200  | 0.85929600  |
| O | -2.60454200 | -0.09177200 | -1.55387500 |
| H | -2.65716400 | -0.60449900 | -2.37609900 |
| H | -1.60259600 | -0.11683200 | -1.33960300 |

**TS21<sub>M-Re</sub>**

|   |             |             |             |
|---|-------------|-------------|-------------|
| S | -2.65496800 | 0.07434000  | 1.66765000  |
| O | -1.63120100 | 0.97320900  | 2.23584900  |
| O | -2.26430100 | -0.72969400 | 0.51452700  |
| N | -4.05192400 | 1.90180700  | 0.20754200  |
| N | -2.97048900 | 2.21407100  | -0.54841500 |
| C | -3.22409600 | -0.96354800 | 2.98233600  |
| C | -3.06292700 | -0.54034900 | 4.29925100  |
| H | -2.59038200 | 0.42074300  | 4.50735600  |
| C | -3.50672200 | -1.38285500 | 5.31681800  |
| H | -3.39198300 | -1.08098900 | 6.35830200  |
| C | -4.08710900 | -2.61349000 | 5.00344700  |
| H | -4.42781600 | -3.26851400 | 5.80663200  |
| C | -4.22851400 | -3.01909900 | 3.67460800  |
| H | -4.67127600 | -3.98799600 | 3.43986300  |
| C | -3.79193200 | -2.18864800 | 2.64553500  |
| H | -3.85899800 | -2.47575600 | 1.59456300  |
| C | -4.08036900 | 1.02077400  | 1.27096100  |
| C | -5.30989100 | 1.02000900  | 1.87147000  |
| H | -5.61002300 | 0.40707000  | 2.71689100  |
| C | -6.09992200 | 1.98261300  | 1.15732500  |
| C | -5.27821600 | 2.53164400  | 0.14571500  |
| C | -5.71229300 | 3.55325700  | -0.70888200 |
| H | -5.04071700 | 3.98504300  | -1.45098100 |
| C | -7.01382700 | 3.99319100  | -0.54692000 |
| H | -7.39042800 | 4.79062900  | -1.18892300 |
| C | -7.86577700 | 3.44089000  | 0.43733200  |



|   |             |             |             |
|---|-------------|-------------|-------------|
| H | -8.88537200 | 3.81684300  | 0.52818800  |
| C | -7.42298500 | 2.44787500  | 1.29094700  |
| H | -8.07797300 | 2.03588500  | 2.05983300  |
| C | -2.05426100 | 3.19328900  | -0.12941700 |
| C | -1.14027000 | 3.33485800  | -1.28606800 |
| C | 0.00061100  | 4.12625200  | -1.40370000 |
| H | 0.35289500  | 4.71664600  | -0.55485100 |
| C | 0.67009900  | 4.11685600  | -2.62297700 |
| H | 1.57193100  | 4.71516900  | -2.75150400 |
| C | 0.20130800  | 3.33246100  | -3.68847900 |
| H | 0.74415700  | 3.34384600  | -4.63555800 |
| C | -0.91657200 | 2.51660900  | -3.55041400 |
| H | -1.24282800 | 1.87335000  | -4.36950400 |
| C | -1.58507600 | 2.51551000  | -2.32595000 |
| C | -2.69534400 | 1.64348900  | -1.86379500 |
| C | -3.88938800 | 1.43461600  | -2.76053000 |
| H | -3.56625700 | 0.92459100  | -3.67830800 |
| H | -4.36167000 | 2.38880700  | -3.04428300 |
| H | -4.64519800 | 0.80112400  | -2.27494400 |
| C | 3.17402200  | -0.20844100 | 0.25361300  |
| C | 3.40584900  | -1.53748500 | 0.56008900  |
| C | 4.34749000  | -1.84439500 | 1.60249100  |
| C | 5.13378900  | -0.79309000 | 2.15211900  |
| C | 4.89706000  | 0.54322100  | 1.73665100  |
| C | 3.88758600  | 0.86492400  | 0.86258000  |
| H | 3.89317100  | -3.96589700 | 1.74354900  |
| C | 4.51755500  | -3.15738900 | 2.12376900  |
| C | 6.09977400  | -1.09024700 | 3.15210300  |
| H | 5.49356500  | 1.34669700  | 2.17410600  |
| C | 6.25924600  | -2.37218300 | 3.61628800  |
| C | 5.44648500  | -3.41225100 | 3.10407300  |
| H | 6.70080400  | -0.27222400 | 3.55462000  |
| H | 6.99760800  | -2.58977500 | 4.38916800  |
| H | 5.55401600  | -4.42487500 | 3.49526000  |
| C | 2.68400900  | -2.60859300 | -0.17792700 |
| C | 3.38359200  | -3.69183000 | -0.81543000 |
| C | 1.30849700  | -2.55055600 | -0.30135200 |
| C | 4.80349600  | -3.75341300 | -0.89714600 |
| C | 2.63026600  | -4.73869500 | -1.42027100 |
| C | 0.54953500  | -3.53654400 | -0.99562900 |
| C | 5.43115800  | -4.81777700 | -1.49844600 |
| H | 5.39729600  | -2.93807700 | -0.48536000 |
| C | 3.30817500  | -5.83484200 | -2.02087400 |
| C | 1.21600700  | -4.63218100 | -1.48531700 |
| C | 4.67923900  | -5.88125000 | -2.05353900 |
| H | 6.52035300  | -4.83867000 | -1.55510700 |
| H | 2.71205100  | -6.63141900 | -2.47065100 |
| H | 0.65085400  | -5.40970500 | -2.00520100 |
| H | 5.19092100  | -6.72310200 | -2.52179800 |
| O | 0.63095900  | -1.50137600 | 0.29211000  |
| O | 2.24894300  | 0.11173200  | -0.72422600 |
| P | 0.66742900  | -0.03801400 | -0.40692100 |
| O | -0.15427000 | 0.07895000  | -1.62833600 |
| C | -0.89819900 | -3.30517500 | -1.28256700 |
| C | -1.90687500 | -3.73150800 | -0.38665000 |
| C | -1.24107800 | -2.63626500 | -2.47579700 |
| C | -3.23831400 | -3.45912300 | -0.70037100 |
| C | -2.59135500 | -2.31316300 | -2.68479500 |
| C | -3.60130300 | -2.70310800 | -1.81601600 |
| H | -4.02002300 | -3.82758500 | -0.02840800 |
| H | -2.85763600 | -1.74908300 | -3.58435200 |
| C | 3.57187000  | 2.29555300  | 0.57609200  |
| C | 3.06428600  | 3.13159900  | 1.59370700  |
| C | 3.86866900  | 2.83079700  | -0.69901700 |
| C | 2.90384400  | 4.49439200  | 1.30361100  |
| C | 3.71205300  | 4.20007100  | -0.92003400 |

|   |             |             |             |
|---|-------------|-------------|-------------|
| C | 3.24313600  | 5.05793100  | 0.07712400  |
| H | 2.51002900  | 5.14770300  | 2.08874600  |
| H | 3.98735300  | 4.60850600  | -1.89685300 |
| C | -1.64588700 | -4.47993100 | 0.91868300  |
| C | -0.76642200 | -3.71678000 | 1.91753600  |
| C | -1.14626000 | -5.91437200 | 0.71396800  |
| H | -2.63963100 | -4.56884000 | 1.38887100  |
| H | -1.00710200 | -2.64504400 | 1.91876700  |
| H | -0.91935000 | -4.11822900 | 2.93132400  |
| H | 0.30259400  | -3.81927100 | 1.68164500  |
| H | -1.79095400 | -6.46271400 | 0.01188700  |
| H | -0.11898600 | -5.92815700 | 0.32537000  |
| H | -1.14559100 | -6.45317200 | 1.67380300  |
| C | -0.33458000 | -2.33167700 | -3.67781900 |
| C | -0.51470000 | -3.47009900 | -4.69636300 |
| C | 1.16188900  | -2.03658600 | -3.52963500 |
| H | -0.77245700 | -1.42085200 | -4.11706200 |
| H | -1.57410500 | -3.64331500 | -4.93191100 |
| H | 0.02030100  | -3.24149000 | -5.63033800 |
| H | -0.10203900 | -4.40761100 | -4.29143800 |
| H | 1.37153200  | -1.26328900 | -2.78560100 |
| H | 1.75473900  | -2.93079900 | -3.29894100 |
| H | 1.52118100  | -1.65620500 | -4.49824500 |
| C | -5.04229200 | -2.29368000 | -2.04820400 |
| C | -5.55513600 | -1.44767600 | -0.87796300 |
| C | -5.94992800 | -3.49900000 | -2.30317700 |
| H | -5.05312900 | -1.66108200 | -2.95122600 |
| H | -4.84208500 | -0.64543800 | -0.63724300 |
| H | -6.53229600 | -0.99530700 | -1.10681200 |
| H | -5.68031600 | -2.06448300 | 0.02731500  |
| H | -5.60266800 | -4.08112200 | -3.16819800 |
| H | -5.96200900 | -4.16895100 | -1.42940400 |
| H | -6.98446100 | -3.17619100 | -2.49313200 |
| C | 2.69614600  | 2.75320500  | 3.03590100  |
| C | 3.77960100  | 3.24588000  | 4.00720500  |
| C | 2.31218400  | 1.31097300  | 3.38683900  |
| H | 1.79634600  | 3.35779000  | 3.23385700  |
| H | 3.45431500  | 3.09843600  | 5.04803300  |
| H | 4.71283300  | 2.67967200  | 3.86536600  |
| H | 4.00606100  | 4.31145400  | 3.86244900  |
| H | 1.70788000  | 0.83707000  | 2.60690600  |
| H | 3.18816800  | 0.67762000  | 3.57742100  |
| H | 1.71773800  | 1.32896300  | 4.31281600  |
| C | 4.42369500  | 1.97615700  | -1.83061800 |
| C | 5.84618300  | 2.40966000  | -2.20046100 |
| C | 3.49752300  | 1.99048200  | -3.04933300 |
| H | 4.48668900  | 0.93664300  | -1.48420800 |
| H | 6.51158900  | 2.36839900  | -1.32580800 |
| H | 6.25861900  | 1.75246000  | -2.98050700 |
| H | 5.86116500  | 3.44014700  | -2.58741600 |
| H | 2.48282800  | 1.66987600  | -2.77457100 |
| H | 3.43289100  | 3.00038100  | -3.48606300 |
| H | 3.87944600  | 1.31287200  | -3.82802900 |
| C | 3.19209600  | 6.56393300  | -0.11402800 |
| C | 2.51673400  | 6.99893600  | -1.41449400 |
| C | 4.60752900  | 7.14629100  | -0.01752800 |
| H | 2.60253700  | 6.97225900  | 0.72309600  |
| H | 1.48342800  | 6.63068700  | -1.47852300 |
| H | 2.49067100  | 8.09645700  | -1.48186900 |
| H | 3.06823700  | 6.63151000  | -2.29424100 |
| H | 5.08478400  | 6.86877700  | 0.93279900  |
| H | 5.23676200  | 6.76033700  | -0.83468100 |
| H | 4.58684900  | 8.24401700  | -0.09093300 |
| O | -2.08314200 | 3.74864100  | 0.93718500  |
| H | -0.36815300 | 1.02520100  | 1.30663600  |
| H | -1.84113300 | 0.35651200  | -1.68306500 |

|                            |              |             |             |
|----------------------------|--------------|-------------|-------------|
| O                          | 0.46501000   | 0.98844100  | 0.74971600  |
| <b>TS22<sub>M-Si</sub></b> |              |             |             |
| S                          | -5.67007700  | 1.57301300  | -0.94139800 |
| O                          | -5.00154500  | 0.94932200  | -2.07401900 |
| O                          | -5.57790100  | 3.01219600  | -0.73050400 |
| N                          | -3.77595700  | 0.55981600  | 0.75958700  |
| N                          | -2.82111700  | 1.18232000  | 0.02172600  |
| C                          | -7.39093500  | 1.12696400  | -0.97784000 |
| C                          | -7.75224600  | -0.08221100 | -1.56829900 |
| H                          | -6.98294600  | -0.71741100 | -2.01135700 |
| C                          | -9.09896200  | -0.43711400 | -1.57815600 |
| H                          | -9.40942000  | -1.37749300 | -2.03490300 |
| C                          | -10.04975000 | 0.41363300  | -1.00942500 |
| H                          | -11.10329800 | 0.13027300  | -1.02123300 |
| C                          | -9.66691000  | 1.62544500  | -0.43293600 |
| H                          | -10.41786500 | 2.28763000  | -0.00051200 |
| C                          | -8.32246400  | 1.99449800  | -0.41521700 |
| H                          | -7.98562400  | 2.93883900  | 0.01501100  |
| C                          | -5.12908600  | 0.73341300  | 0.52991700  |
| C                          | -5.86115700  | 0.13252700  | 1.51363000  |
| H                          | -6.94544400  | 0.07993800  | 1.56301800  |
| C                          | -4.91201700  | -0.44142500 | 2.42760900  |
| C                          | -3.61593500  | -0.16497600 | 1.92715000  |
| C                          | -2.44857500  | -0.58830200 | 2.57368600  |
| H                          | -1.46516000  | -0.37837500 | 2.15267600  |
| C                          | -2.61582500  | -1.29593400 | 3.75393100  |
| H                          | -1.73088700  | -1.64180200 | 4.28925100  |
| C                          | -3.89574200  | -1.58817800 | 4.27464500  |
| H                          | -3.97625200  | -2.15139500 | 5.20525400  |
| C                          | -5.04377000  | -1.17363200 | 3.62193300  |
| H                          | -6.03249100  | -1.40408000 | 4.02136200  |
| C                          | -2.24734200  | 0.61562800  | -1.09391600 |
| H                          | -0.95130900  | 1.77615800  | 1.27111800  |
| C                          | -1.39834800  | 1.68124900  | -1.65835500 |
| C                          | -0.69767100  | 1.69907900  | -2.86250500 |
| H                          | -0.74832500  | 0.84845300  | -3.54370200 |
| C                          | 0.05436700   | 2.83119000  | -3.15497700 |
| H                          | 0.60550700   | 2.89411600  | -4.09415300 |
| C                          | 0.11609800   | 3.89532900  | -2.24101400 |
| H                          | 0.71890600   | 4.77223700  | -2.48293900 |
| C                          | -0.56571300  | 3.85751900  | -1.02719400 |
| H                          | -0.48068500  | 4.67839900  | -0.31611600 |
| C                          | -1.34649800  | 2.73745500  | -0.74611300 |
| C                          | -2.12188400  | 2.38342600  | 0.47016900  |
| C                          | -2.95673400  | 3.40225200  | 1.19344900  |
| H                          | -3.39665700  | 2.96629300  | 2.10220800  |
| H                          | -3.76697200  | 3.76820600  | 0.54575800  |
| H                          | -2.31949400  | 4.24288900  | 1.49913900  |
| C                          | 2.33790000   | -2.43478000 | -0.06500300 |
| C                          | 3.62393800   | -2.07517700 | -0.39488000 |
| C                          | 4.36645900   | -2.96380800 | -1.25223500 |
| C                          | 3.80476200   | -4.23268600 | -1.57798400 |
| C                          | 2.48328000   | -4.55349400 | -1.15713300 |
| C                          | 1.71054700   | -3.64774500 | -0.47992400 |
| H                          | 6.05354100   | -1.63902400 | -1.60020300 |
| C                          | 5.63070800   | -2.62261300 | -1.80522300 |
| C                          | 4.54626500   | -5.13487200 | -2.38733900 |
| H                          | 2.05084300   | -5.51186000 | -1.45412500 |
| C                          | 5.77825300   | -4.78721500 | -2.88482800 |
| C                          | 6.31623200   | -3.51007400 | -2.60113600 |
| H                          | 4.10610700   | -6.10665200 | -2.62016200 |
| H                          | 6.33509900   | -5.48503700 | -3.51150700 |
| H                          | 7.28086700   | -3.22345200 | -3.02206300 |
| C                          | 4.19877700   | -0.80568700 | 0.13036000  |
| C                          | 5.46958600   | -0.81281500 | 0.80758500  |
| C                          | 3.52882400   | 0.40165700  | 0.00514900  |

|   |             |             |             |
|---|-------------|-------------|-------------|
| C | 6.13535800  | -2.01447900 | 1.18201900  |
| C | 6.08373300  | 0.42485900  | 1.14521100  |
| C | 4.11171200  | 1.64722300  | 0.38043500  |
| C | 7.35608700  | -1.97852700 | 1.81196100  |
| H | 5.66209600  | -2.97408100 | 0.97692600  |
| C | 7.35624000  | 0.43221100  | 1.77949800  |
| C | 5.38902000  | 1.63350600  | 0.88497100  |
| C | 7.98538200  | -0.74375400 | 2.10183900  |
| H | 7.84163900  | -2.91254700 | 2.09792900  |
| H | 7.81331600  | 1.39470500  | 2.01814300  |
| H | 5.86390800  | 2.58239500  | 1.14442700  |
| H | 8.95821600  | -0.73136100 | 2.59490900  |
| O | 2.27542100  | 0.45885300  | -0.57213700 |
| O | 1.59112300  | -1.57205300 | 0.72200600  |
| P | 0.96028600  | -0.28486100 | -0.01563400 |
| O | 0.09499000  | 0.48299100  | 0.91082100  |
| C | 3.38685900  | 2.95634600  | 0.30746300  |
| C | 3.42654400  | 3.74468800  | -0.86295600 |
| C | 2.80785200  | 3.47641200  | 1.48987100  |
| C | 2.92862000  | 5.05391900  | -0.81170100 |
| C | 2.29295700  | 4.77764100  | 1.46371300  |
| C | 2.36877500  | 5.60041600  | 0.34034100  |
| H | 3.01769300  | 5.66624900  | -1.71201200 |
| H | 1.86511300  | 5.18372800  | 2.38662900  |
| C | 0.25702600  | -3.80937700 | -0.18821400 |
| C | -0.70792600 | -3.67707800 | -1.20692900 |
| C | -0.14706400 | -3.92214100 | 1.16487300  |
| C | -2.05888100 | -3.60534900 | -0.82605700 |
| C | -1.50100500 | -3.87087600 | 1.47834200  |
| C | -2.47812300 | -3.68021200 | 0.49591900  |
| H | -2.79810200 | -3.43531400 | -1.61149500 |
| H | -1.81700300 | -3.94027900 | 2.52334900  |
| C | 4.09638700  | 3.34544000  | -2.17856900 |
| C | 3.75967500  | 1.96428400  | -2.74763200 |
| C | 5.61531200  | 3.55221700  | -2.11062200 |
| H | 3.71360700  | 4.07514600  | -2.91071300 |
| H | 2.68950800  | 1.73575500  | -2.66085400 |
| H | 4.03766800  | 1.93959300  | -3.81208100 |
| H | 4.32479100  | 1.16238100  | -2.25221100 |
| H | 5.86431900  | 4.56748200  | -1.76966900 |
| H | 6.07673800  | 2.83277300  | -1.41854400 |
| H | 6.06546100  | 3.39962300  | -3.10316800 |
| C | 2.81285100  | 2.81619000  | 2.87472000  |
| C | 4.04232200  | 3.26778600  | 3.67708800  |
| C | 2.64399000  | 1.29850300  | 2.98213000  |
| H | 1.93490600  | 3.25113200  | 3.37903400  |
| H | 4.15005800  | 4.36171800  | 3.66907600  |
| H | 3.95636900  | 2.93412700  | 4.72208200  |
| H | 4.96137400  | 2.82800100  | 3.26273600  |
| H | 1.81955700  | 0.93695300  | 2.35650600  |
| H | 3.56094500  | 0.74767400  | 2.73214400  |
| H | 2.39522800  | 1.04934500  | 4.02489500  |
| C | 1.87942900  | 7.03894800  | 0.42533400  |
| C | 0.34958700  | 7.12511000  | 0.38955900  |
| C | 2.48479800  | 7.95253500  | -0.63803000 |
| H | 2.20523200  | 7.41163000  | 1.41114200  |
| H | -0.10922700 | 6.48205500  | 1.15501800  |
| H | 0.01497400  | 8.15784100  | 0.56704800  |
| H | -0.03130200 | 6.81368300  | -0.59550500 |
| H | 3.58215300  | 7.88978100  | -0.64947700 |
| H | 2.11703300  | 7.69221100  | -1.64251000 |
| H | 2.20049400  | 8.99714300  | -0.44755700 |
| C | -0.49740800 | -3.60891300 | -2.72710600 |
| C | -0.89073800 | -4.96171000 | -3.34117000 |
| C | 0.83498000  | -3.15544300 | -3.33706900 |
| H | -1.24898700 | -2.87329300 | -3.05940100 |

|   |             |             |             |
|---|-------------|-------------|-------------|
| H | -0.85225600 | -4.91250700 | -4.43980700 |
| H | -0.19055300 | -5.74504300 | -3.01049300 |
| H | -1.90238000 | -5.26762900 | -3.04110300 |
| H | 1.29109200  | -2.31357000 | -2.80419700 |
| H | 1.56669500  | -3.97185300 | -3.39052200 |
| H | 0.64011500  | -2.83482900 | -4.37177900 |
| C | 0.86477100  | -4.13591000 | 2.28150000  |
| C | 0.88374500  | -5.61243800 | 2.69380000  |
| C | 0.62098300  | -3.22691500 | 3.48695800  |
| H | 1.86468000  | -3.89610400 | 1.89515500  |
| H | 1.12102800  | -6.25769600 | 1.83552800  |
| H | 1.63298300  | -5.79017200 | 3.47999400  |
| H | -0.10063000 | -5.91719700 | 3.08173100  |
| H | 0.54925400  | -2.17501800 | 3.17311700  |
| H | -0.30422300 | -3.50193700 | 4.01624200  |
| H | 1.44845100  | -3.31854800 | 4.20597500  |
| C | -3.93614300 | -3.57132700 | 0.90038800  |
| C | -4.51930900 | -4.96068300 | 1.18393100  |
| C | -4.79267900 | -2.81472900 | -0.11387600 |
| H | -3.94988800 | -3.00415900 | 1.84603300  |
| H | -3.93645400 | -5.49125200 | 1.95060400  |
| H | -5.55957700 | -4.88202100 | 1.53454400  |
| H | -4.50901500 | -5.57332500 | 0.26895800  |
| H | -4.32444300 | -1.86190400 | -0.40808900 |
| H | -4.94365400 | -3.41089100 | -1.02836000 |
| H | -5.78639200 | -2.60822400 | 0.31220800  |
| O | -2.35259400 | -0.55168200 | -1.44177100 |
| H | -0.66534400 | -0.90235200 | -1.38614600 |
| O | 0.32504200  | -0.78569000 | -1.35909500 |

### Int12<sub>M</sub>

|   |              |             |             |
|---|--------------|-------------|-------------|
| S | -6.81930200  | 0.58881900  | -0.87628500 |
| O | -7.32976000  | -0.78818900 | -0.85776300 |
| O | -6.31937000  | 1.16222500  | -2.11397900 |
| N | -4.29106500  | 0.20381400  | 0.08693500  |
| N | -3.95349600  | -0.54319100 | -0.99986600 |
| C | -8.09062000  | 1.63054900  | -0.20882200 |
| C | -9.03351700  | 1.07799500  | 0.65451100  |
| H | -8.99327400  | 0.01374400  | 0.89054300  |
| C | -10.01578400 | 1.91347800  | 1.18247200  |
| H | -10.76733000 | 1.50677000  | 1.85990400  |
| C | -10.04169600 | 3.26569000  | 0.83657500  |
| H | -10.81496300 | 3.91397800  | 1.25132000  |
| C | -9.09387800  | 3.79545700  | -0.04111100 |
| H | -9.12959400  | 4.85063300  | -0.31396800 |
| C | -8.10377400  | 2.97409500  | -0.57549600 |
| H | -7.35381400  | 3.35043200  | -1.27295000 |
| C | -5.54188800  | 0.73000900  | 0.34283100  |
| C | -5.54598100  | 1.36963500  | 1.55314400  |
| H | -6.39208600  | 1.88739500  | 1.99678300  |
| C | -4.21549300  | 1.24304900  | 2.08307300  |
| C | -3.45438900  | 0.50781800  | 1.14420500  |
| C | -2.09533300  | 0.21997800  | 1.31372200  |
| H | -1.52637900  | -0.33646900 | 0.56653600  |
| C | -1.50773400  | 0.69192100  | 2.47544000  |
| H | -0.45150600  | 0.48447700  | 2.65221000  |
| C | -2.24191600  | 1.42407900  | 3.43695900  |
| H | -1.73494400  | 1.77192400  | 4.33803000  |
| C | -3.58465500  | 1.70451400  | 3.25526100  |
| H | -4.14634700  | 2.27258400  | 3.99811200  |
| C | -4.42552800  | -1.82833400 | -1.22017700 |
| C | -3.81824200  | -2.27140100 | -2.37886500 |
| C | -3.86459800  | -3.52252500 | -3.06560800 |
| H | -4.50070700  | -4.32624400 | -2.69170100 |
| C | -3.08951800  | -3.68125200 | -4.17924300 |
| H | -3.10069700  | -4.63020600 | -4.71790200 |
| C | -2.25131300  | -2.61792800 | -4.66682200 |

|   |             |             |             |
|---|-------------|-------------|-------------|
| H | -1.65196200 | -2.79195400 | -5.56214900 |
| C | -2.18603700 | -1.40809700 | -4.03414600 |
| H | -1.53356100 | -0.61606700 | -4.40637800 |
| C | -2.96619300 | -1.20185700 | -2.85439300 |
| C | -3.07983000 | -0.12504600 | -1.98630700 |
| C | -2.48277300 | 1.23882600  | -1.98999300 |
| H | -1.61380200 | 1.30916300  | -1.31701300 |
| H | -3.23331500 | 1.98954100  | -1.69951500 |
| H | -2.14063900 | 1.47738600  | -3.00508900 |
| C | 2.78850300  | -1.77673200 | 0.43728800  |
| C | 4.04814700  | -1.66390400 | -0.12228900 |
| C | 4.58065400  | -2.81655800 | -0.80170800 |
| C | 3.89462800  | -4.06024500 | -0.69165000 |
| C | 2.64114700  | -4.11588300 | -0.02544600 |
| C | 2.03409100  | -2.98408600 | 0.45817000  |
| H | 6.26722800  | -1.81116000 | -1.73598900 |
| C | 5.75817800  | -2.76491500 | -1.59823800 |
| C | 4.44040600  | -5.21683100 | -1.31297000 |
| H | 2.11668200  | -5.07047100 | 0.03960000  |
| C | 5.59632600  | -5.14110500 | -2.04916400 |
| C | 6.24999500  | -3.89538900 | -2.20577000 |
| H | 3.90614800  | -6.16334700 | -1.20879100 |
| H | 6.00153900  | -6.03210100 | -2.53044500 |
| H | 7.14858700  | -3.82957600 | -2.82067000 |
| C | 4.81226800  | -0.38888500 | -0.02163800 |
| C | 6.18198000  | -0.35105700 | 0.42743300  |
| C | 4.21057200  | 0.81399300  | -0.33176900 |
| C | 6.84756600  | -1.48843900 | 0.96329000  |
| C | 6.90303800  | 0.87695700  | 0.35662000  |
| C | 4.88111000  | 2.07187500  | -0.27618500 |
| C | 8.16466700  | -1.42059700 | 1.35076800  |
| H | 6.29887300  | -2.42273400 | 1.07583300  |
| C | 8.26973000  | 0.91062700  | 0.74552800  |
| C | 6.22514600  | 2.07234700  | -0.01025100 |
| C | 8.89348000  | -0.21434800 | 1.22469200  |
| H | 8.64975900  | -2.30487300 | 1.76617800  |
| H | 8.80781400  | 1.85792000  | 0.67283300  |
| H | 6.77526000  | 3.01592300  | 0.00042800  |
| H | 9.94066000  | -0.17655900 | 1.52740700  |
| O | 2.90667000  | 0.83848800  | -0.78258600 |
| O | 2.21917700  | -0.67871100 | 1.06771600  |
| P | 1.64278400  | 0.52083500  | 0.16535100  |
| O | 1.58690400  | 1.63883200  | 1.29807200  |
| C | 4.02453200  | 3.29179800  | -0.37645800 |
| C | 3.56328400  | 3.76749700  | -1.62727900 |
| C | 3.54339800  | 3.85898300  | 0.82455700  |
| C | 2.56449300  | 4.74302300  | -1.64649800 |
| C | 2.53647900  | 4.83605900  | 0.73840900  |
| C | 2.01253000  | 5.27092800  | -0.47665800 |
| H | 2.20189000  | 5.09381400  | -2.61641200 |
| H | 2.15269900  | 5.27441400  | 1.66481500  |
| C | 0.62822500  | -2.97854800 | 0.95697800  |
| C | -0.44730600 | -3.16002600 | 0.05355900  |
| C | 0.37884000  | -2.76819100 | 2.32859600  |
| C | -1.74530200 | -3.14360300 | 0.57683600  |
| C | -0.94062400 | -2.74812700 | 2.79005300  |
| C | -2.02077600 | -2.92889100 | 1.92957200  |
| H | -2.58298500 | -3.27389700 | -0.11578700 |
| H | -1.12179200 | -2.56995500 | 3.85180800  |
| C | 4.14882800  | 3.34813500  | -2.97457700 |
| C | 3.99437100  | 1.87504300  | -3.36834400 |
| C | 5.60790600  | 3.80142800  | -3.10586200 |
| H | 3.57330500  | 3.92225800  | -3.71764700 |
| H | 2.96879200  | 1.51662900  | -3.21503300 |
| H | 4.24837500  | 1.76391900  | -4.43294600 |
| H | 4.67331200  | 1.22151800  | -2.80304500 |

|   |             |             |             |
|---|-------------|-------------|-------------|
| H | 5.71574700  | 4.87017800  | -2.87172500 |
| H | 6.26011400  | 3.23092000  | -2.42961600 |
| H | 5.96487400  | 3.63483400  | -4.13310200 |
| C | 4.07244100  | 3.59272200  | 2.24089700  |
| C | 5.28464300  | 4.49977600  | 2.49923300  |
| C | 4.37677700  | 2.16371400  | 2.71275200  |
| H | 3.26578200  | 3.95416000  | 2.89842300  |
| H | 5.05875500  | 5.54990700  | 2.26597500  |
| H | 5.59338200  | 4.43395800  | 3.55313900  |
| H | 6.13793100  | 4.18905400  | 1.87851100  |
| H | 3.58943500  | 1.45309000  | 2.43849400  |
| H | 5.33664500  | 1.78667800  | 2.33949600  |
| H | 4.44360300  | 2.17797000  | 3.81108300  |
| C | 0.88147500  | 6.27993900  | -0.52719700 |
| C | -0.39272100 | 5.64358000  | -1.09256200 |
| C | 1.26975900  | 7.53273400  | -1.31665100 |
| H | 0.67614700  | 6.58502700  | 0.51178500  |
| H | -0.69315900 | 4.76217700  | -0.50766400 |
| H | -1.22464300 | 6.36306900  | -1.08309700 |
| H | -0.23802800 | 5.31905100  | -2.13297800 |
| H | 2.17910500  | 7.99488500  | -0.90764300 |
| H | 1.45865300  | 7.29035600  | -2.37338800 |
| H | 0.45888600  | 8.27507700  | -1.28535400 |
| C | -0.34854400 | -3.38637700 | -1.45995800 |
| C | -0.26535300 | -4.87601600 | -1.81724100 |
| C | 0.68525000  | -2.57107700 | -2.24368300 |
| H | -1.32564400 | -3.04926900 | -1.83743300 |
| H | -0.42830900 | -5.00376900 | -2.89834300 |
| H | 0.72081300  | -5.29980600 | -1.57575000 |
| H | -1.03279700 | -5.45737100 | -1.28554600 |
| H | 0.65820900  | -1.51329600 | -1.95009600 |
| H | 1.71113500  | -2.94923800 | -2.13585600 |
| H | 0.42738800  | -2.62930300 | -3.31167500 |
| C | 1.50254600  | -2.61717000 | 3.34594500  |
| C | 1.53688100  | -3.83018500 | 4.28291800  |
| C | 1.40295200  | -1.31014200 | 4.13757700  |
| H | 2.46076300  | -2.59873600 | 2.80803100  |
| H | 1.63953500  | -4.76454300 | 3.71241400  |
| H | 2.38155400  | -3.75671500 | 4.98431900  |
| H | 0.60998800  | -3.89699600 | 4.87286900  |
| H | 1.46920400  | -0.44215700 | 3.46671300  |
| H | 0.45674300  | -1.24919700 | 4.69739600  |
| H | 2.22599300  | -1.24051300 | 4.86471900  |
| C | -3.46617700 | -2.87309500 | 2.39256200  |
| C | -3.64944100 | -2.22682300 | 3.76231600  |
| C | -4.10142900 | -4.26692700 | 2.34822500  |
| H | -4.00474600 | -2.25694100 | 1.65492600  |
| H | -3.18457500 | -1.22986100 | 3.80188500  |
| H | -4.72078800 | -2.11252600 | 3.98317300  |
| H | -3.21263300 | -2.84505900 | 4.56283800  |
| H | -4.03824400 | -4.69721900 | 1.33927900  |
| H | -3.59041300 | -4.94687200 | 3.04797000  |
| H | -5.16453000 | -4.21540200 | 2.62717600  |
| O | -5.23514300 | -2.43834200 | -0.34215200 |
| H | -6.14455400 | -2.09748700 | -0.46995700 |
| O | 0.42099900  | 0.32493400  | -0.62209600 |
| H | 1.37137000  | 2.52532400  | 0.96117000  |

**(M,R)-3a**

|   |             |             |             |
|---|-------------|-------------|-------------|
| C | -3.43254500 | -0.53695500 | -0.23488700 |
| C | -2.22320800 | -1.27047000 | -0.24860900 |
| C | -2.13765000 | -2.58332300 | -0.72727900 |
| C | -3.31272200 | -3.16520800 | -1.17390900 |
| C | -4.53812100 | -2.46401600 | -1.15010600 |
| C | -4.60900800 | -1.16021400 | -0.69065300 |
| C | -3.12543800 | 0.77729300  | 0.26128100  |
| H | -1.18514300 | -3.11446700 | -0.76089900 |

|   |             |             |             |
|---|-------------|-------------|-------------|
| H | -3.29035800 | -4.18596600 | -1.55793200 |
| H | -5.44034400 | -2.95993400 | -1.50955900 |
| H | -5.55612500 | -0.61900100 | -0.68636500 |
| H | -3.78931300 | 1.62546000  | 0.40295500  |
| C | -1.78855800 | 0.78516000  | 0.53683900  |
| N | -1.23288200 | -0.45466300 | 0.26262000  |
| C | 2.02726400  | -1.90775600 | 0.72305500  |
| C | 2.14232000  | -1.30743900 | -0.52944900 |
| C | 3.10869600  | -2.59515100 | 1.26717300  |
| C | 3.30941300  | -1.37600800 | -1.28274700 |
| C | 4.28662100  | -2.66912100 | 0.52112600  |
| H | 3.04448300  | -3.06720300 | 2.24908600  |
| C | 4.39001500  | -2.06835400 | -0.74056500 |
| H | 3.35717100  | -0.89378200 | -2.26055300 |
| H | 5.14501800  | -3.20522800 | 0.92892500  |
| H | 5.32483500  | -2.14528700 | -1.29721400 |
| N | 0.09017500  | -0.75983900 | 0.28974100  |
| C | 0.86199900  | -0.63630200 | -0.87218800 |
| O | 0.51335600  | -0.09815200 | -1.88742000 |
| C | 0.65214000  | -1.66620000 | 1.30333200  |
| H | 0.07378500  | -2.60905400 | 1.28704000  |
| C | 0.64172300  | -1.10076500 | 2.71374700  |
| H | -0.37699400 | -0.81480300 | 3.00774500  |
| H | 1.00832500  | -1.86348200 | 3.41532700  |
| H | 1.26912700  | -0.20429500 | 2.78500700  |
| S | -0.89066000 | 2.16429500  | 1.19385600  |
| O | -0.24721200 | 1.75875900  | 2.43706300  |
| O | -1.83333000 | 3.27134000  | 1.16034400  |
| C | 0.38827100  | 2.45275200  | -0.00748300 |
| C | 1.70053700  | 2.12089700  | 0.31500300  |
| C | 0.03433800  | 2.97283900  | -1.24966600 |
| C | 2.68754200  | 2.29496300  | -0.65349200 |
| H | 1.92787200  | 1.72732500  | 1.30665400  |
| C | 1.02999000  | 3.14224100  | -2.20677000 |
| H | -1.00646400 | 3.22722100  | -1.45722200 |
| C | 2.34969400  | 2.79841900  | -1.90984200 |
| H | 3.72213300  | 2.03417200  | -0.42570800 |
| H | 0.77506100  | 3.53608300  | -3.19099400 |
| H | 3.12407000  | 2.92574300  | -2.66787100 |

**(M,S)-3a**

|   |             |             |             |
|---|-------------|-------------|-------------|
| C | -3.50889800 | -0.05948300 | -0.16847000 |
| C | -2.42355600 | -0.96061000 | -0.27704400 |
| C | -2.55376000 | -2.24041700 | -0.82850300 |
| C | -3.81737600 | -2.61365300 | -1.25389000 |
| C | -4.92275400 | -1.74148400 | -1.13985400 |
| C | -4.78141000 | -0.47278600 | -0.60626600 |
| C | -2.99632900 | 1.15990300  | 0.39577900  |
| H | -1.69231400 | -2.90155100 | -0.92539300 |
| H | -3.96247200 | -3.60225300 | -1.69160200 |
| H | -5.90102900 | -2.07609600 | -1.48654100 |
| H | -5.63587400 | 0.20089000  | -0.52882600 |
| H | -3.52576600 | 2.07969900  | 0.62853000  |
| C | -1.66384700 | 0.95531800  | 0.60671200  |
| N | -1.30451700 | -0.32976900 | 0.23045600  |
| C | 1.95251400  | -1.78378500 | 0.77335200  |
| C | 2.02293600  | -1.38629000 | -0.56055700 |
| C | 3.05074100  | -2.39045500 | 1.37727800  |
| C | 3.16513700  | -1.57039400 | -1.33176000 |
| C | 4.20377100  | -2.58055700 | 0.61308200  |
| H | 3.01917300  | -2.70723100 | 2.42133900  |
| C | 4.26438900  | -2.17694100 | -0.72750500 |
| H | 3.18053900  | -1.23915100 | -2.37148500 |
| H | 5.07580900  | -3.05232000 | 1.06872900  |
| H | 5.18000900  | -2.34099100 | -1.29714000 |
| N | -0.04164400 | -0.82140000 | 0.19633100  |
| C | 0.74014800  | -0.74564900 | -0.95626300 |



|   |             |             |             |
|---|-------------|-------------|-------------|
| O | 0.40574400  | -0.25498200 | -2.00102800 |
| C | 0.59601900  | -1.46029700 | 1.35482000  |
| H | 0.68467900  | -0.71283000 | 2.16059700  |
| C | -0.17756800 | -2.67414500 | 1.85377000  |
| H | 0.31350800  | -3.09188100 | 2.74346300  |
| H | -1.20067300 | -2.38463700 | 2.13373200  |
| H | -0.22292100 | -3.45191700 | 1.07845900  |
| S | -0.53446900 | 2.10610700  | 1.33094800  |
| O | 0.09641200  | 1.47116000  | 2.48487000  |
| O | -1.28283700 | 3.34422600  | 1.47035000  |
| C | 0.71566200  | 2.30730800  | 0.08075600  |
| C | 2.00332500  | 1.84889600  | 0.33923800  |
| C | 0.36204100  | 2.89464500  | -1.13230800 |
| C | 2.96443200  | 1.96509900  | -0.66431300 |
| H | 2.23172700  | 1.39961800  | 1.30743400  |
| C | 1.33016300  | 3.00107800  | -2.12522600 |
| H | -0.65901300 | 3.24515700  | -1.29341700 |
| C | 2.62532000  | 2.53399700  | -1.89129900 |
| H | 3.97754200  | 1.60104800  | -0.48733500 |
| H | 1.07298700  | 3.44246400  | -3.08840600 |
| H | 3.37756400  | 2.61342300  | -2.67751400 |

**TS23***IR-Sa-3R*

|   |             |             |             |
|---|-------------|-------------|-------------|
| S | -5.09310000 | -0.18490500 | -0.50331200 |
| O | -5.08599700 | 0.27212400  | 0.88607600  |
| O | -5.12286300 | -1.59473700 | -0.85690600 |
| O | -0.86818100 | 2.79172000  | 1.83481000  |
| N | -2.66575700 | 1.24058600  | -0.68955800 |
| N | -2.41284500 | 1.12742400  | 0.64115700  |
| C | -6.51219000 | 0.55764600  | -1.29645300 |
| C | -7.03372200 | 1.74207600  | -0.78231100 |
| H | -6.58286800 | 2.19182100  | 0.10308100  |
| C | -8.14582300 | 2.30814900  | -1.40086600 |
| H | -8.57166000 | 3.23366100  | -1.01158000 |
| C | -8.72127500 | 1.68474300  | -2.50945700 |
| H | -9.59275400 | 2.13146500  | -2.99017000 |
| C | -8.19881600 | 0.48667000  | -2.99754500 |
| H | -8.66440100 | -0.00557700 | -3.85222100 |
| C | -7.08823900 | -0.09208000 | -2.38529000 |
| H | -6.67307800 | -1.04230000 | -2.72463300 |
| C | -3.73777800 | 0.62250100  | -1.33431700 |
| C | -3.61833500 | 0.78640200  | -2.68339900 |
| H | -4.32471100 | 0.43418600  | -3.43094800 |
| C | -2.42112800 | 1.54275300  | -2.90901700 |
| C | -1.83677600 | 1.80274000  | -1.64941800 |
| C | -0.65249400 | 2.54043800  | -1.51153500 |
| H | -0.19363100 | 2.73608500  | -0.53931300 |
| C | -0.06943900 | 3.00143100  | -2.68018600 |
| H | 0.85786500  | 3.56820400  | -2.60895800 |
| C | -0.63077600 | 2.74738800  | -3.95092800 |
| H | -0.12693600 | 3.12751700  | -4.84028500 |
| C | -1.80079000 | 2.02506100  | -4.07665500 |
| H | -2.24012300 | 1.82578600  | -5.05506900 |
| C | -2.16835400 | -0.20468100 | 1.29568200  |
| H | -1.08718900 | -0.31534200 | 1.42354800  |
| C | -2.72789600 | 0.06954600  | 2.66356100  |
| C | -2.96717800 | -0.80343100 | 3.71287200  |
| H | -2.84015800 | -1.87695300 | 3.57336800  |
| C | -3.39522700 | -0.26392200 | 4.92853300  |
| H | -3.61083500 | -0.92994100 | 5.76519600  |
| C | -3.55711000 | 1.11599300  | 5.09278200  |
| H | -3.89303900 | 1.50888000  | 6.05299000  |
| C | -3.30309700 | 1.99267100  | 4.03709700  |
| H | -3.44012600 | 3.06888000  | 4.16110000  |
| C | -2.89138100 | 1.44570200  | 2.82593300  |
| C | -2.62752500 | 2.10699100  | 1.52648600  |
| C | -3.28046800 | 3.37448200  | 1.09772800  |

|   |             |             |             |
|---|-------------|-------------|-------------|
| H | -2.80524600 | 3.77158300  | 0.19252500  |
| H | -3.23083700 | 4.12430000  | 1.89539800  |
| H | -4.33323400 | 3.13196800  | 0.88744200  |
| C | 2.20549200  | -2.25247100 | -0.01390300 |
| C | 3.48133300  | -2.00245600 | -0.48887500 |
| C | 4.09688100  | -2.97406200 | -1.35183600 |
| C | 3.45753500  | -4.23291400 | -1.53543900 |
| C | 2.16725900  | -4.44492300 | -0.98259400 |
| C | 1.49306100  | -3.45203600 | -0.31462700 |
| H | 5.79287200  | -1.75589000 | -1.95712600 |
| C | 5.31506100  | -2.73137900 | -2.04630700 |
| C | 4.08208000  | -5.22628300 | -2.33829500 |
| H | 1.66713600  | -5.39886300 | -1.15995200 |
| C | 5.27460600  | -4.97314000 | -2.96925800 |
| C | 5.88596800  | -3.70347900 | -2.83255100 |
| H | 3.58069000  | -6.18911600 | -2.45801800 |
| H | 5.74226200  | -5.73816000 | -3.59052400 |
| H | 6.81595900  | -3.49141000 | -3.36195400 |
| C | 4.16760500  | -0.73871400 | -0.11084600 |
| C | 5.50196300  | -0.73775500 | 0.42959100  |
| C | 3.50924800  | 0.47195600  | -0.24575400 |
| C | 6.18981000  | -1.93173900 | 0.78795000  |
| C | 6.16463500  | 0.50468400  | 0.64295100  |
| C | 4.12828200  | 1.71661500  | 0.07669500  |
| C | 7.47432300  | -1.89040200 | 1.27495600  |
| H | 5.68225100  | -2.88998100 | 0.68265800  |
| C | 7.49981200  | 0.51575300  | 1.13098400  |
| C | 5.45013000  | 1.71544500  | 0.44313200  |
| C | 8.14803600  | -0.65551600 | 1.43350100  |
| H | 7.97638200  | -2.81935800 | 1.54905200  |
| H | 7.99225000  | 1.47954900  | 1.27633200  |
| H | 5.94598200  | 2.66412500  | 0.66258800  |
| H | 9.17035200  | -0.63756400 | 1.81358500  |
| O | 2.23593500  | 0.50937300  | -0.75819200 |
| O | 1.60875600  | -1.32958000 | 0.81092300  |
| P | 0.94481100  | 0.00489300  | 0.11247200  |
| O | 0.69512000  | 0.96583700  | 1.25934800  |
| C | 3.30539300  | 2.96100200  | 0.11712100  |
| C | 3.07807400  | 3.73283700  | -1.04182200 |
| C | 2.75092000  | 3.35524200  | 1.35733200  |
| C | 2.27228000  | 4.87412300  | -0.94460200 |
| C | 1.92570100  | 4.48551500  | 1.37913500  |
| C | 1.66285800  | 5.25550600  | 0.24835100  |
| H | 2.12115400  | 5.47613300  | -1.84367500 |
| H | 1.48541400  | 4.79266200  | 2.33402300  |
| C | 0.05015600  | -3.62677400 | 0.02754800  |
| C | -0.90981500 | -3.70945300 | -1.00906400 |
| C | -0.35081100 | -3.77218200 | 1.37477500  |
| C | -2.24056000 | -3.97383100 | -0.65235000 |
| C | -1.69063000 | -4.04259300 | 1.66751100  |
| C | -2.65601800 | -4.15226100 | 0.66508100  |
| H | -2.99465500 | -4.01147500 | -1.44396200 |
| H | -1.98583800 | -4.17500800 | 2.71336600  |
| C | 3.73666700  | 3.48321800  | -2.39899100 |
| C | 3.59342300  | 2.08110200  | -3.00098800 |
| C | 5.20696500  | 3.92080300  | -2.38107700 |
| H | 3.21676500  | 4.16767400  | -3.09030600 |
| H | 2.57066500  | 1.69323900  | -2.90682600 |
| H | 3.85612400  | 2.12384100  | -4.06881300 |
| H | 4.27467600  | 1.35942400  | -2.52949700 |
| H | 5.31170300  | 4.95045300  | -2.00999800 |
| H | 5.80133800  | 3.25805800  | -1.73584700 |
| H | 5.63179300  | 3.87154500  | -3.39508100 |
| C | 3.06936000  | 2.77089900  | 2.74200800  |
| C | 4.22408400  | 3.57751700  | 3.35732600  |
| C | 3.32952600  | 1.27333500  | 2.94414700  |

|   |             |             |             |
|---|-------------|-------------|-------------|
| H | 2.16999800  | 2.99874600  | 3.33920200  |
| H | 4.02477500  | 4.65824600  | 3.33178900  |
| H | 4.39071900  | 3.27478300  | 4.40206400  |
| H | 5.15529100  | 3.39098800  | 2.80117000  |
| H | 2.57832400  | 0.65066400  | 2.44897200  |
| H | 4.32896500  | 0.96710200  | 2.61049500  |
| H | 3.27724100  | 1.06764200  | 4.02466900  |
| C | 0.70851400  | 6.43242300  | 0.34123000  |
| C | -0.73605600 | 5.93054800  | 0.22811000  |
| C | 0.98349500  | 7.53335300  | -0.68049600 |
| H | 0.83661100  | 6.86454300  | 1.34807700  |
| H | -0.92893100 | 5.13963700  | 0.96659000  |
| H | -1.45461400 | 6.75155400  | 0.37742600  |
| H | -0.90600900 | 5.49715800  | -0.77122300 |
| H | 2.03327500  | 7.85856600  | -0.65197700 |
| H | 0.75801900  | 7.19279000  | -1.70242000 |
| H | 0.34536500  | 8.40618500  | -0.48064600 |
| C | -0.67034100 | -3.56462500 | -2.51903400 |
| C | -0.52084100 | -4.93741000 | -3.19070100 |
| C | 0.40907100  | -2.59662100 | -3.01610400 |
| H | -1.62445000 | -3.15082800 | -2.88391400 |
| H | -0.55537600 | -4.82635800 | -4.28501300 |
| H | 0.44478900  | -5.39882800 | -2.93772600 |
| H | -1.32146400 | -5.62717900 | -2.88667300 |
| H | 0.38740400  | -1.65400600 | -2.45618200 |
| H | 1.41960800  | -3.02279600 | -2.96465700 |
| H | 0.20840500  | -2.37235200 | -4.07510800 |
| C | 0.64819100  | -3.69887400 | 2.52106200  |
| C | 0.76935400  | -5.05298500 | 3.22764300  |
| C | 0.29700600  | -2.58432100 | 3.50962400  |
| H | 1.63470400  | -3.46047200 | 2.10324800  |
| H | 1.05776800  | -5.84202200 | 2.51822100  |
| H | 1.52865200  | -5.00805200 | 4.02265600  |
| H | -0.18600000 | -5.34756300 | 3.68883000  |
| H | 0.23078800  | -1.61280800 | 2.99745600  |
| H | -0.65982400 | -2.78690700 | 4.01617600  |
| H | 1.07161500  | -2.50229300 | 4.28679100  |
| C | -4.11197400 | -4.44492600 | 0.97366900  |
| C | -4.70098100 | -3.48660200 | 2.00956100  |
| C | -4.28570000 | -5.90424700 | 1.40776200  |
| H | -4.66863700 | -4.29046000 | 0.03627700  |
| H | -4.57049500 | -2.44195200 | 1.69575100  |
| H | -5.77656500 | -3.68090600 | 2.13681500  |
| H | -4.22680700 | -3.62994200 | 2.99466400  |
| H | -3.90415300 | -6.59578500 | 0.64305600  |
| H | -3.73348000 | -6.09819300 | 2.34101100  |
| H | -5.34650900 | -6.13511500 | 1.58772000  |
| O | -2.69527600 | -1.22096500 | 0.57036800  |
| H | -2.00197800 | -1.55539400 | -0.03003600 |
| H | -0.69915300 | 2.95318600  | 2.77354200  |
| O | -0.17947300 | -0.37908600 | -0.78340200 |
| H | -0.18440700 | 2.02885000  | 1.55272400  |

**TS24<sub>ISi-Ra-3R</sub>**

|   |             |             |             |
|---|-------------|-------------|-------------|
| S | -2.92192300 | -1.06553200 | 1.61996700  |
| O | -2.11528400 | -0.03597100 | 2.24448300  |
| O | -2.42336000 | -1.94702500 | 0.56568600  |
| O | -1.47843100 | -1.73316400 | -1.98313100 |
| N | -4.34536700 | 0.29591600  | -0.32007500 |
| N | -3.24852400 | 0.54437900  | -1.08977400 |
| C | -3.59683600 | -2.09626100 | 2.89986000  |
| C | -3.62610400 | -1.60322500 | 4.20142000  |
| H | -3.23585000 | -0.60597300 | 4.40989900  |
| C | -4.13990500 | -2.42076300 | 5.20726300  |
| H | -4.17036900 | -2.06047200 | 6.23603500  |
| C | -4.60057000 | -3.70109600 | 4.89881800  |
| H | -4.99623800 | -4.33803900 | 5.69125700  |

|   |             |             |             |
|---|-------------|-------------|-------------|
| C | -4.54978000 | -4.18053700 | 3.58762400  |
| H | -4.89904500 | -5.18787700 | 3.35832200  |
| C | -4.04175500 | -3.37571400 | 2.57145900  |
| H | -3.97372300 | -3.72826400 | 1.54077400  |
| C | -4.37817100 | -0.30830300 | 0.93073300  |
| C | -5.64519700 | -0.25574500 | 1.43527800  |
| H | -5.96596800 | -0.68238500 | 2.38195700  |
| C | -6.45386200 | 0.43381200  | 0.46492100  |
| C | -5.61069500 | 0.77729100  | -0.61319300 |
| C | -6.06797400 | 1.46796400  | -1.74144200 |
| H | -5.39700500 | 1.72578900  | -2.56327500 |
| C | -7.41088200 | 1.80732400  | -1.76903600 |
| H | -7.80726100 | 2.34617100  | -2.63046600 |
| C | -8.27656800 | 1.47220600  | -0.70579300 |
| H | -9.32682000 | 1.75857200  | -0.76597700 |
| C | -7.81346800 | 0.79128900  | 0.40656200  |
| H | -8.48562400 | 0.53704900  | 1.22704300  |
| C | -2.45883200 | 1.82095300  | -0.90979500 |
| H | -1.84550600 | 1.71684100  | -0.00507000 |
| C | -1.63274000 | 1.77057000  | -2.17091900 |
| C | -0.59636500 | 2.59918700  | -2.57936800 |
| H | -0.24504400 | 3.41590200  | -1.94758900 |
| C | 0.00745200  | 2.32617200  | -3.80939800 |
| H | 0.83036800  | 2.95701600  | -4.14636700 |
| C | -0.39665700 | 1.24966000  | -4.60620200 |
| H | 0.11307200  | 1.05789900  | -5.55048600 |
| C | -1.40374200 | 0.39369600  | -4.17717200 |
| H | -1.67913700 | -0.49127400 | -4.75219700 |
| C | -2.01073800 | 0.67710200  | -2.95664900 |
| C | -2.99050900 | -0.11189800 | -2.21555700 |
| C | -3.90823300 | -1.15916500 | -2.72753100 |
| H | -3.44089000 | -1.69123200 | -3.55975300 |
| H | -4.84606400 | -0.68174900 | -3.05349100 |
| H | -4.13172300 | -1.87400400 | -1.92536400 |
| C | 2.84544200  | 1.54062800  | 0.38519500  |
| C | 3.86097800  | 0.67240600  | 0.76246600  |
| C | 4.64506100  | 0.99860500  | 1.92682000  |
| C | 4.46913300  | 2.26593800  | 2.55515700  |
| C | 3.44330800  | 3.13154500  | 2.09614600  |
| C | 2.59927700  | 2.76313800  | 1.07976100  |
| H | 5.67846600  | -0.91005900 | 2.10236400  |
| C | 5.57171600  | 0.09074000  | 2.51781000  |
| C | 5.26883000  | 2.61589000  | 3.67754200  |
| H | 3.28158200  | 4.08278100  | 2.60950700  |
| C | 6.18344400  | 1.73340100  | 4.19425800  |
| C | 6.31728200  | 0.44872800  | 3.61537400  |
| H | 5.12417000  | 3.59896700  | 4.13060500  |
| H | 6.78806200  | 2.00794600  | 5.05979100  |
| H | 7.01290800  | -0.27078400 | 4.04977600  |
| C | 4.05307800  | -0.62630900 | 0.06028300  |
| C | 5.33572600  | -1.11018600 | -0.36656100 |
| C | 2.95915300  | -1.45299500 | -0.11164400 |
| C | 6.49087200  | -0.28220200 | -0.41355300 |
| C | 5.46253300  | -2.47505800 | -0.75802100 |
| C | 3.05695500  | -2.80400200 | -0.55105000 |
| C | 7.70849300  | -0.78883600 | -0.80090400 |
| H | 6.39585200  | 0.76988400  | -0.14201100 |
| C | 6.73886700  | -2.97300900 | -1.13780800 |
| C | 4.30877500  | -3.30591400 | -0.80041800 |
| C | 7.84015600  | -2.15274900 | -1.15730000 |
| H | 8.57992000  | -0.13342700 | -0.83858100 |
| H | 6.82171300  | -4.02243300 | -1.42902300 |
| H | 4.42515600  | -4.35495200 | -1.07900900 |
| H | 8.81271600  | -2.54478600 | -1.45820500 |
| O | 1.72744700  | -1.01376000 | 0.26151000  |
| O | 2.05926500  | 1.26569100  | -0.70048500 |

|   |             |             |             |
|---|-------------|-------------|-------------|
| P | 0.92190700  | 0.05878400  | -0.70002200 |
| O | 0.83365800  | -0.44341200 | -2.11199400 |
| C | 1.79915700  | -3.58996900 | -0.72856200 |
| C | 0.97865300  | -3.92582000 | 0.37567800  |
| C | 1.39823500  | -3.95101100 | -2.04144400 |
| C | -0.21478300 | -4.62123000 | 0.13653000  |
| C | 0.19223300  | -4.63901200 | -2.20457700 |
| C | -0.63314800 | -4.98366900 | -1.13773200 |
| H | -0.82996300 | -4.88595300 | 1.00012600  |
| H | -0.12247900 | -4.90549500 | -3.21876000 |
| C | 1.41536900  | 3.59792600  | 0.71838800  |
| C | 0.18423600  | 3.40226700  | 1.37649600  |
| C | 1.54329100  | 4.59077900  | -0.27843100 |
| C | -0.91222400 | 4.16812900  | 0.94942100  |
| C | 0.43197300  | 5.36273100  | -0.62422600 |
| C | -0.81816200 | 5.14419500  | -0.03882500 |
| H | -1.88318800 | 3.99812400  | 1.42570400  |
| H | 0.53985500  | 6.13472800  | -1.39092300 |
| C | 1.22567200  | -3.65202100 | 1.86915200  |
| C | 0.18157800  | -2.66762000 | 2.42488200  |
| C | 2.62534300  | -3.26787600 | 2.35481900  |
| H | 1.01556900  | -4.62772700 | 2.34073600  |
| H | -0.83542200 | -3.07158300 | 2.31707200  |
| H | 0.36575000  | -2.48748100 | 3.49556500  |
| H | 0.21952300  | -1.70613600 | 1.89445800  |
| H | 3.41397900  | -3.87650500 | 1.89291300  |
| H | 2.85227100  | -2.20786500 | 2.18161600  |
| H | 2.66578300  | -3.42915700 | 3.44252200  |
| C | 2.16092200  | -3.70362400 | -3.35244000 |
| C | 3.03737700  | -4.91100400 | -3.71406900 |
| C | 2.92858100  | -2.38998700 | -3.54635100 |
| H | 1.35730600  | -3.67942300 | -4.10569700 |
| H | 2.46825200  | -5.85094600 | -3.66869800 |
| H | 3.43916500  | -4.79574900 | -4.73240500 |
| H | 3.89281500  | -4.99878900 | -3.02917900 |
| H | 2.37798500  | -1.53848000 | -3.12641800 |
| H | 3.93392100  | -2.41568100 | -3.10777700 |
| H | 3.05477000  | -2.22380800 | -4.62794800 |
| C | -1.96789700 | -5.65839200 | -1.39556600 |
| C | -3.03075100 | -4.59534400 | -1.69673500 |
| C | -2.42253100 | -6.57499200 | -0.26125400 |
| H | -1.84466000 | -6.27729600 | -2.30014300 |
| H | -2.71738200 | -3.96327600 | -2.53857200 |
| H | -4.00362100 | -5.05822400 | -1.92670800 |
| H | -3.14445000 | -3.92895300 | -0.82524700 |
| H | -1.64276100 | -7.30185200 | 0.00734500  |
| H | -2.66976100 | -5.99705800 | 0.64294700  |
| H | -3.32675600 | -7.12820300 | -0.55492600 |
| C | -0.07709000 | 2.54664700  | 2.62064900  |
| C | -0.02251700 | 3.47315800  | 3.84692000  |
| C | 0.74385200  | 1.28656800  | 2.90360400  |
| H | -1.11613300 | 2.19897800  | 2.50693000  |
| H | -0.30646100 | 2.92204600  | 4.75612800  |
| H | 1.00173300  | 3.85292800  | 3.98891800  |
| H | -0.69147400 | 4.33907800  | 3.73866900  |
| H | 0.78878500  | 0.62450000  | 2.03431900  |
| H | 1.76076100  | 1.50884200  | 3.25455100  |
| H | 0.23063600  | 0.72914000  | 3.70214700  |
| C | 2.85584300  | 4.80165700  | -1.01884600 |
| C | 3.24918200  | 6.27685500  | -1.12048700 |
| C | 2.78948900  | 4.14859900  | -2.40405600 |
| H | 3.64613800  | 4.29057400  | -0.45194100 |
| H | 3.26609900  | 6.75497500  | -0.13055900 |
| H | 4.24979200  | 6.37231400  | -1.56714000 |
| H | 2.55222700  | 6.84161500  | -1.75827300 |
| H | 2.53306600  | 3.08214200  | -2.31909800 |

|   |             |             |             |
|---|-------------|-------------|-------------|
| H | 2.02282500  | 4.65006700  | -3.01937200 |
| H | 3.75388600  | 4.23881500  | -2.92661000 |
| C | -2.03474100 | 5.95959400  | -0.43592300 |
| C | -2.24947200 | 5.97886800  | -1.95119000 |
| C | -1.94154100 | 7.38436100  | 0.11894000  |
| H | -2.90664500 | 5.46508200  | 0.02052900  |
| H | -2.28219700 | 4.95807700  | -2.36076500 |
| H | -3.18965100 | 6.49104000  | -2.20582300 |
| H | -1.43489700 | 6.51224500  | -2.46478500 |
| H | -1.82875500 | 7.37380600  | 1.21204000  |
| H | -1.06892100 | 7.90624400  | -0.30372100 |
| H | -2.84148400 | 7.96570800  | -0.13298700 |
| O | -3.31698700 | 2.89394000  | -0.77451100 |
| H | -3.61706500 | 3.19034700  | -1.64324200 |
| H | -0.58219400 | -1.32301400 | -2.13844400 |
| O | -0.31360400 | 0.41388800  | 0.05067200  |
| H | -1.47498000 | -1.96691300 | -1.03878000 |

**TS25***IS-Ra-3S*

|   |              |             |             |
|---|--------------|-------------|-------------|
| S | -5.86153700  | -0.19206400 | -0.91951800 |
| O | -5.94702900  | -1.53456900 | -1.46696700 |
| O | -5.33926700  | 0.92748000  | -1.69638300 |
| O | -1.22727900  | 2.68041500  | 0.57639200  |
| N | -3.63756300  | 0.18914900  | 0.74788600  |
| N | -2.87129000  | 0.72354300  | -0.23788500 |
| C | -7.50169300  | 0.23543800  | -0.35774900 |
| C | -8.44310700  | -0.78104000 | -0.22128200 |
| H | -8.16330300  | -1.80692200 | -0.46486800 |
| C | -9.72763000  | -0.44851800 | 0.20837400  |
| H | -10.48062800 | -1.22939900 | 0.32077300  |
| C | -10.05011300 | 0.88016800  | 0.48276500  |
| H | -11.05698900 | 1.13562000  | 0.81602400  |
| C | -9.09664800  | 1.88853900  | 0.32450100  |
| H | -9.35970500  | 2.92709800  | 0.52806400  |
| C | -7.81080200  | 1.56990800  | -0.10302400 |
| H | -7.05529000  | 2.34327700  | -0.24734700 |
| C | -4.95536800  | -0.23664500 | 0.61455400  |
| C | -5.38212300  | -0.78120300 | 1.79322600  |
| H | -6.37331900  | -1.18805600 | 1.97920100  |
| C | -4.28157800  | -0.70899400 | 2.71251200  |
| C | -3.19788400  | -0.11426500 | 2.02719400  |
| C | -1.94734200  | 0.10958500  | 2.61613300  |
| H | -1.11903800  | 0.53884600  | 2.05071300  |
| C | -1.81844300  | -0.27228300 | 3.94091700  |
| H | -0.86133200  | -0.11859800 | 4.44105200  |
| C | -2.88216900  | -0.86999600 | 4.65431000  |
| H | -2.72760700  | -1.15904400 | 5.69458700  |
| C | -4.10850800  | -1.09564100 | 4.05577600  |
| H | -4.92709000  | -1.56166800 | 4.60607900  |
| C | -2.18293100  | -0.16216900 | -1.22562100 |
| H | -1.29992800  | -0.60921800 | -0.74890400 |
| C | -1.79367600  | 0.86563600  | -2.25671200 |
| C | -1.15664000  | 0.67730400  | -3.47546100 |
| H | -0.82231600  | -0.31480600 | -3.77521000 |
| C | -0.94004200  | 1.79798000  | -4.27676400 |
| H | -0.44328900  | 1.67935700  | -5.24063600 |
| C | -1.34590000  | 3.07575000  | -3.86858500 |
| H | -1.17021500  | 3.93135000  | -4.52168400 |
| C | -1.97185700  | 3.26295800  | -2.63897400 |
| H | -2.29986100  | 4.25450200  | -2.32316900 |
| C | -2.18045200  | 2.13767900  | -1.84408800 |
| C | -2.80036500  | 2.02723000  | -0.51185200 |
| C | -3.75365600  | 2.99878400  | 0.08177100  |
| H | -3.89541000  | 2.79607400  | 1.15024800  |
| H | -4.70137600  | 2.86965400  | -0.46181900 |
| H | -3.38469500  | 4.02145400  | -0.05053300 |
| C | 2.79499700   | -2.04674300 | -0.04911800 |

|   |             |             |             |
|---|-------------|-------------|-------------|
| C | 4.09744700  | -1.64172600 | -0.26306800 |
| C | 4.98259100  | -2.56049500 | -0.92760600 |
| C | 4.53408100  | -3.89028900 | -1.17962900 |
| C | 3.19357600  | -4.25955100 | -0.87048200 |
| C | 2.29564500  | -3.34442400 | -0.38658200 |
| H | 6.62369000  | -1.16829800 | -1.21101300 |
| C | 6.28525100  | -2.19363400 | -1.36259000 |
| C | 5.41729800  | -4.81601100 | -1.79799300 |
| H | 2.86656000  | -5.27809900 | -1.08940200 |
| C | 6.68040200  | -4.43855900 | -2.18414900 |
| C | 7.11058100  | -3.10711200 | -1.97515700 |
| H | 5.06261800  | -5.83353100 | -1.97574900 |
| H | 7.34605100  | -5.15651800 | -2.66521100 |
| H | 8.10325300  | -2.80036000 | -2.30784400 |
| C | 4.51763300  | -0.29212300 | 0.21390500  |
| C | 5.67578300  | -0.12179300 | 1.05310300  |
| C | 3.74668600  | 0.82699900  | -0.06903100 |
| C | 6.42809800  | -1.21830700 | 1.56369000  |
| C | 6.08206800  | 1.19288400  | 1.42583300  |
| C | 4.08447500  | 2.13229200  | 0.39934200  |
| C | 7.54425500  | -1.01494600 | 2.33949200  |
| H | 6.10431500  | -2.23462400 | 1.34366000  |
| C | 7.25104800  | 1.37299300  | 2.21464200  |
| C | 5.26664800  | 2.30101400  | 1.07346600  |
| C | 7.97632500  | 0.29506600  | 2.65655700  |
| H | 8.09746500  | -1.87422700 | 2.72136000  |
| H | 7.54890500  | 2.39067400  | 2.47606900  |
| H | 5.55889000  | 3.29947100  | 1.40735600  |
| H | 8.86857100  | 0.44268600  | 3.26644300  |
| O | 2.64258300  | 0.74131600  | -0.86273900 |
| O | 1.92288800  | -1.17464800 | 0.54305600  |
| P | 1.26129400  | -0.05406500 | -0.46387900 |
| O | 0.38989500  | 0.79040100  | 0.43469400  |
| C | 3.09162800  | 3.24340300  | 0.25965000  |
| C | 2.99045900  | 4.01229500  | -0.92020900 |
| C | 2.24344100  | 3.51974000  | 1.35906300  |
| C | 2.04113500  | 5.04215300  | -0.97943100 |
| C | 1.32452100  | 4.56957000  | 1.24256100  |
| C | 1.20395400  | 5.34971300  | 0.09232200  |
| H | 1.99148400  | 5.63555400  | -1.89382100 |
| H | 0.69388500  | 4.79953700  | 2.10778600  |
| C | 0.83272500  | -3.58531200 | -0.19468300 |
| C | -0.04085000 | -3.78130300 | -1.28192200 |
| C | 0.30151100  | -3.46692600 | 1.11350900  |
| C | -1.42333300 | -3.83588800 | -1.02119100 |
| C | -1.07810500 | -3.47020200 | 1.30699000  |
| C | -1.97563600 | -3.64921800 | 0.24739200  |
| H | -2.08099400 | -4.02730400 | -1.87330500 |
| H | -1.46097300 | -3.33394900 | 2.31981200  |
| C | 3.93141500  | 3.89730200  | -2.11970900 |
| C | 4.02902200  | 2.52886300  | -2.80015700 |
| C | 5.32586200  | 4.44040500  | -1.78131100 |
| H | 3.50492400  | 4.58028800  | -2.87168700 |
| H | 3.04126800  | 2.08102800  | -2.96560000 |
| H | 4.52997100  | 2.65159400  | -3.77236100 |
| H | 4.62624800  | 1.81716200  | -2.21427700 |
| H | 5.26579600  | 5.44644200  | -1.34128500 |
| H | 5.84180300  | 3.78112600  | -1.06913700 |
| H | 5.94145500  | 4.49711900  | -2.69173400 |
| C | 2.29511400  | 2.87050900  | 2.74865000  |
| C | 3.26306300  | 3.64620800  | 3.65393900  |
| C | 2.53999800  | 1.36389900  | 2.87740000  |
| H | 1.28287400  | 3.03872000  | 3.15119100  |
| H | 3.05479600  | 4.72576300  | 3.63822800  |
| H | 3.18022900  | 3.29013400  | 4.69184000  |
| H | 4.30306100  | 3.49219100  | 3.33096100  |

|   |             |             |             |
|---|-------------|-------------|-------------|
| H | 1.92481700  | 0.79124200  | 2.17444000  |
| H | 3.59348000  | 1.08587700  | 2.73885900  |
| H | 2.25954100  | 1.05748000  | 3.89762700  |
| C | 0.21192100  | 6.50555200  | 0.07585400  |
| C | -1.22914000 | 5.99977100  | 0.20389200  |
| C | 0.34506200  | 7.41467900  | -1.14193600 |
| H | 0.42767300  | 7.11069400  | 0.97308200  |
| H | -1.36581400 | 5.36306300  | 1.09047900  |
| H | -1.93880700 | 6.83763200  | 0.27249400  |
| H | -1.49191100 | 5.40910000  | -0.68903700 |
| H | 1.36535300  | 7.80968600  | -1.24366400 |
| H | 0.09668100  | 6.87257700  | -2.06790500 |
| H | -0.34471700 | 8.26650200  | -1.05891400 |
| C | 0.33479000  | -4.00326400 | -2.75084400 |
| C | 0.45543200  | -5.50629200 | -3.03979800 |
| C | 1.51866000  | -3.23334200 | -3.34961700 |
| H | -0.55301900 | -3.65334000 | -3.30174900 |
| H | 0.60246300  | -5.67723000 | -4.11693700 |
| H | 1.31826000  | -5.93695800 | -2.51018800 |
| H | -0.44275300 | -6.05388400 | -2.71950000 |
| H | 1.57320700  | -2.21333500 | -2.94903900 |
| H | 2.47856000  | -3.73625700 | -3.17880100 |
| H | 1.37656600  | -3.17685200 | -4.44002200 |
| C | 1.20468000  | -3.40994800 | 2.33748500  |
| C | 1.22385700  | -4.78180100 | 3.02301200  |
| C | 0.81264500  | -2.30452500 | 3.31577100  |
| H | 2.22945500  | -3.20210700 | 2.00623100  |
| H | 1.56091900  | -5.56555800 | 2.32903700  |
| H | 1.90086000  | -4.77225300 | 3.89053800  |
| H | 0.21698900  | -5.05379300 | 3.37633700  |
| H | 0.72411500  | -1.34363100 | 2.78944000  |
| H | -0.14553000 | -2.52383200 | 3.81158500  |
| H | 1.57674400  | -2.20466800 | 4.10166900  |
| C | -3.48434500 | -3.59755400 | 0.47807000  |
| C | -3.89853500 | -4.24789900 | 1.80049900  |
| C | -4.29912600 | -4.18244600 | -0.67623700 |
| H | -3.75393800 | -2.52797100 | 0.54862400  |
| H | -3.44780600 | -3.75190800 | 2.67058400  |
| H | -4.99068300 | -4.18748000 | 1.91969100  |
| H | -3.60902000 | -5.31032600 | 1.81850500  |
| H | -4.19012600 | -3.60979000 | -1.60776200 |
| H | -4.01334600 | -5.22885100 | -0.86674800 |
| H | -5.36881800 | -4.14901500 | -0.42884600 |
| O | -3.06012200 | -1.12057400 | -1.67573800 |
| H | -2.72017600 | -1.98942100 | -1.41887400 |
| H | -0.52783800 | 1.93300800  | 0.49512700  |
| O | 0.71413300  | -0.66884400 | -1.69828000 |
| H | -0.78212300 | 3.44750700  | 0.18364600  |

**TS26<sub>IS-Sa-3S</sub>**

|   |             |             |             |
|---|-------------|-------------|-------------|
| S | -3.67935900 | 0.43843000  | 1.91301400  |
| O | -3.46812700 | 1.79396100  | 2.43929600  |
| O | -2.54257900 | -0.33834300 | 1.44477500  |
| O | -1.47283400 | 2.75240700  | 0.76277200  |
| N | -4.35726900 | 0.99146700  | -0.67552000 |
| N | -3.13161800 | 1.46192600  | -1.02455700 |
| C | -4.58985000 | -0.47516200 | 3.12475200  |
| C | -5.45277500 | 0.20979400  | 3.97859400  |
| H | -5.54292100 | 1.29467000  | 3.90618400  |
| C | -6.16842000 | -0.52568300 | 4.92030700  |
| H | -6.85063600 | -0.01662200 | 5.60185300  |
| C | -6.00071200 | -1.91008700 | 5.00039100  |
| H | -6.56078200 | -2.47854700 | 5.74424300  |
| C | -5.11528500 | -2.57230900 | 4.14880100  |
| H | -4.97733100 | -3.65098100 | 4.22970100  |
| C | -4.39615500 | -1.85231400 | 3.19700200  |
| H | -3.67934300 | -2.33031800 | 2.52706700  |



|   |             |             |             |
|---|-------------|-------------|-------------|
| C | -4.81005500 | 0.55892100  | 0.56245200  |
| C | -6.13340700 | 0.23088300  | 0.48915100  |
| H | -6.73346900 | -0.16364600 | 1.30503800  |
| C | -6.53977900 | 0.45741600  | -0.87185300 |
| C | -5.40826700 | 0.92400200  | -1.57371700 |
| C | -5.42313200 | 1.23094900  | -2.93813200 |
| H | -4.51589700 | 1.55268800  | -3.45108800 |
| C | -6.63007600 | 1.06232100  | -3.59552300 |
| H | -6.69045700 | 1.28001700  | -4.66252700 |
| C | -7.78202500 | 0.59981900  | -2.92030700 |
| H | -8.71024100 | 0.47747700  | -3.47929800 |
| C | -7.75033900 | 0.29272200  | -1.57157300 |
| H | -8.64126500 | -0.07079200 | -1.05798100 |
| C | -2.04985300 | 0.60665800  | -1.61788400 |
| H | -1.51323800 | 0.20225000  | -0.75025500 |
| C | -1.22686900 | 1.68500700  | -2.28228600 |
| C | -0.21252900 | 1.57514300  | -3.22423700 |
| H | 0.10306200  | 0.59556600  | -3.57735700 |
| C | 0.38939700  | 2.75345400  | -3.66778500 |
| H | 1.18251000  | 2.69937000  | -4.41524800 |
| C | 0.00563400  | 4.00450600  | -3.16966900 |
| H | 0.50742800  | 4.90126900  | -3.53519100 |
| C | -1.00113500 | 4.11300200  | -2.21397000 |
| H | -1.29823500 | 5.08347700  | -1.81290800 |
| C | -1.61672500 | 2.93451500  | -1.80135500 |
| C | -2.73999000 | 2.72954300  | -0.87938700 |
| C | -3.65948000 | 3.76878400  | -0.35181400 |
| H | -4.13708800 | 3.41892900  | 0.57285300  |
| H | -4.43435200 | 3.96661600  | -1.10888300 |
| H | -3.09754100 | 4.68542800  | -0.14624200 |
| C | 2.33366300  | -2.33511100 | 0.00982900  |
| C | 3.68544400  | -2.04765100 | -0.03496800 |
| C | 4.56895000  | -3.02226200 | -0.61769200 |
| C | 4.04986800  | -4.30241500 | -0.96839200 |
| C | 2.65104800  | -4.54155100 | -0.87714200 |
| C | 1.78109900  | -3.55528100 | -0.48840200 |
| H | 6.34342600  | -1.77021800 | -0.66232000 |
| C | 5.94264000  | -2.76044900 | -0.87854400 |
| C | 4.92492000  | -5.29152500 | -1.49363500 |
| H | 2.25931400  | -5.50741700 | -1.20291000 |
| C | 6.25452800  | -5.01868800 | -1.70211400 |
| C | 6.76144900  | -3.73111000 | -1.40542600 |
| H | 4.51092800  | -6.26989100 | -1.74721200 |
| H | 6.91561000  | -5.78288700 | -2.11326100 |
| H | 7.81001200  | -3.50359900 | -1.60291900 |
| C | 4.16005300  | -0.74134800 | 0.49696200  |
| C | 5.23806700  | -0.65770700 | 1.44641200  |
| C | 3.51527500  | 0.42930700  | 0.12190600  |
| C | 5.83486500  | -1.80597200 | 2.04121500  |
| C | 5.71835200  | 0.62346500  | 1.84341600  |
| C | 3.91644600  | 1.70870400  | 0.61204500  |
| C | 6.88061900  | -1.68552800 | 2.92475200  |
| H | 5.44546000  | -2.79378700 | 1.79763500  |
| C | 6.81281600  | 0.71682500  | 2.74601300  |
| C | 5.03785800  | 1.78762100  | 1.39893900  |
| C | 7.39172700  | -0.41146000 | 3.27073100  |
| H | 7.31492200  | -2.58176800 | 3.37025700  |
| H | 7.17078500  | 1.70966500  | 3.02675200  |
| H | 5.37185700  | 2.76432900  | 1.75795100  |
| H | 8.22700900  | -0.32991100 | 3.96763200  |
| O | 2.48860600  | 0.39572100  | -0.77810200 |
| O | 1.47477800  | -1.42766700 | 0.56750600  |
| P | 0.98721600  | -0.18052400 | -0.39920300 |
| O | 0.24950300  | 0.79059100  | 0.47524600  |
| C | 3.05040100  | 2.90659200  | 0.38812300  |
| C | 3.17869800  | 3.72379100  | -0.75524500 |

|   |             |             |             |
|---|-------------|-------------|-------------|
| C | 2.10043300  | 3.22745900  | 1.38619200  |
| C | 2.37217400  | 4.86432700  | -0.86771100 |
| C | 1.29303000  | 4.35203100  | 1.19024100  |
| C | 1.42135600  | 5.19995400  | 0.09335600  |
| H | 2.50797900  | 5.50060600  | -1.74492500 |
| H | 0.53940200  | 4.58271200  | 1.94900500  |
| C | 0.30071200  | -3.67843700 | -0.62990000 |
| C | -0.28975500 | -3.69728000 | -1.91235000 |
| C | -0.51272400 | -3.69360500 | 0.52473000  |
| C | -1.68963100 | -3.76218900 | -1.98973400 |
| C | -1.90007500 | -3.75587300 | 0.38647100  |
| C | -2.51341000 | -3.79976200 | -0.86623500 |
| H | -2.15429200 | -3.79256000 | -2.98123600 |
| H | -2.51571500 | -3.79020200 | 1.29005400  |
| C | 4.21682300  | 3.52200100  | -1.85834700 |
| C | 4.24219700  | 2.14435100  | -2.52686000 |
| C | 5.62012900  | 3.92988100  | -1.39259800 |
| H | 3.92768200  | 4.23840500  | -2.64502200 |
| H | 3.23071900  | 1.78152700  | -2.75099800 |
| H | 4.81495200  | 2.20895400  | -3.46471500 |
| H | 4.73359400  | 1.38957700  | -1.89780200 |
| H | 5.61677500  | 4.94106700  | -0.96043100 |
| H | 5.99820400  | 3.23058000  | -0.63336600 |
| H | 6.32248300  | 3.91714900  | -2.24007400 |
| C | 1.93576500  | 2.57539400  | 2.76762900  |
| C | 2.75759200  | 3.38155800  | 3.78646800  |
| C | 2.18023500  | 1.07970800  | 2.98925800  |
| H | 0.87205700  | 2.73887500  | 3.00752100  |
| H | 2.53049600  | 4.45616200  | 3.73439100  |
| H | 2.55560300  | 3.02865300  | 4.80912100  |
| H | 3.83377200  | 3.25225200  | 3.59342900  |
| H | 1.65647900  | 0.46242800  | 2.25396400  |
| H | 3.24572300  | 0.81513600  | 2.99371000  |
| H | 1.78259200  | 0.82039500  | 3.98304800  |
| C | 0.56417600  | 6.45550600  | 0.03012200  |
| C | 0.67344600  | 7.22201700  | -1.28489900 |
| C | 0.89713300  | 7.39170300  | 1.19936500  |
| H | -0.48381400 | 6.12585500  | 0.15686200  |
| H | 0.44257600  | 6.59194200  | -2.15501800 |
| H | -0.01757100 | 8.07728200  | -1.28877100 |
| H | 1.69159100  | 7.61749500  | -1.42150700 |
| H | 0.78022400  | 6.88743700  | 2.16797300  |
| H | 1.94120100  | 7.73162700  | 1.12188000  |
| H | 0.24439100  | 8.27768400  | 1.19099500  |
| C | 0.42048600  | -3.69393600 | -3.27230300 |
| C | 0.58646000  | -5.12924900 | -3.79204000 |
| C | 1.72201300  | -2.90192000 | -3.45051700 |
| H | -0.31091900 | -3.20826800 | -3.93863400 |
| H | 0.95547500  | -5.11794400 | -4.82882100 |
| H | 1.31794300  | -5.68179800 | -3.18421800 |
| H | -0.36321900 | -5.68310100 | -3.76632200 |
| H | 1.68728800  | -1.95279400 | -2.90291300 |
| H | 2.60775200  | -3.46701400 | -3.13490300 |
| H | 1.84646800  | -2.68357400 | -4.52260300 |
| C | 0.08029900  | -3.69812000 | 1.92593300  |
| C | -0.11202200 | -5.06951100 | 2.58263600  |
| C | -0.48568700 | -2.57437400 | 2.79682800  |
| H | 1.16087700  | -3.52815800 | 1.84141000  |
| H | 0.34593400  | -5.86594100 | 1.97807100  |
| H | 0.34588700  | -5.08734200 | 3.58311200  |
| H | -1.18227700 | -5.30564500 | 2.69488200  |
| H | -0.42306000 | -1.60573500 | 2.28301500  |
| H | -1.54107700 | -2.76157400 | 3.05348200  |
| H | 0.07288100  | -2.51087700 | 3.74284600  |
| C | -4.02197200 | -3.87693600 | -1.01219000 |
| C | -4.68105800 | -2.55241200 | -0.62148800 |

|   |             |             |             |
|---|-------------|-------------|-------------|
| C | -4.61764200 | -5.03863000 | -0.21333100 |
| H | -4.23241700 | -4.05762400 | -2.07887300 |
| H | -4.28581300 | -1.71858300 | -1.22078800 |
| H | -5.77317600 | -2.59479900 | -0.75771600 |
| H | -4.47970200 | -2.32829800 | 0.43717800  |
| H | -4.13830400 | -5.99203800 | -0.47618600 |
| H | -4.48483500 | -4.88153300 | 0.86883400  |
| H | -5.69748200 | -5.12662700 | -0.40460900 |
| O | -2.56185400 | -0.38081800 | -2.41755200 |
| H | -2.04034200 | -1.18208100 | -2.23427300 |
| H | -0.74954900 | 2.06712000  | 0.63051500  |
| O | 0.36947000  | -0.71613300 | -1.64804700 |
| H | -1.95158500 | 2.48056300  | 1.56427400  |

## References

- [1] Rungsima H., Sanit T., Sittisak O., Duangduan C., Jutatip B., Somsak R. Facile synthesis of 1-substituted 4-H phthalazine, a versatile scaffold for chemically diverse phthalazines. *Tetrahedron*, **121**, 132920 (2022).
- [2] Katrun, P., Mueangkaew, C., Pohmakotr, M., Reutrakul, V., Jaipetch, T., Soorukram, D., and Kuhakarn. C. Regioselective C2 sulfonylation of indoles mediated by molecular iodine. *J. Org. Chem.*, **79**, 1778-1785. (2014).
- [3] Chen K.-W., Chen Z.-H., Yang S., Wu S.-F., Zhang Y.-C., Shi F. Organocatalytic Atroposelective Synthesis of N–N Axially Chiral Indoles and Pyrroles by De Novo Ring Formation. *Angew. Chem. Int. Ed.*, **61**, e202116829. (2022).
- [4] Gaussian 16, Revision C.01, Frisch, M. J.; Trucks, G. W.; Schlegel, H. B.; Scuseria, G. E.; Robb, M. A.; Cheeseman, J. R.; Scalmani, G.; Barone, V.; Petersson, G. A.; Nakatsuji, H.; Li, X.; Caricato, M.; Marenich, A. V.; Bloino, J.; Janesko, B. G.; Gomperts, R.; Mennucci, B.; Hratchian, H. P.; Ortiz, J. V.; Izmaylov, A. F.; Sonnenberg, J. L.; Williams-Young, D.; Ding, F.; Lipparini, F.; Egidi, F.; Goings, J.; Peng, B.; Petrone, A.; Henderson, T.; Ranasinghe, D.; Zakrzewski, V. G.; Gao, J.; Rega, N.; Zheng, G.; Liang, W.; Hada, M.; Ehara, M.; Toyota, K.; Fukuda, R.; Hasegawa, J.; Ishida, M.; Nakajima, T.; Honda, Y.; Kitao, O.; Nakai, H.; Vreven, T.; Throssell, K.; Montgomery, J. A., Jr.; Peralta, J. E.; Ogliaro, F.; Bearpark, M. J.; Heyd, J. J.; Brothers, E. N.; Kudin, K. N.; Staroverov, V. N.; Keith, T. A.; Kobayashi, R.; Normand, J.; Raghavachari, K.; Rendell, A. P.; Burant, J. C.; Iyengar, S. S.; Tomasi, J.; Cossi, M.; Millam, J. M.; Klene, M.; Adamo, C.; Cammi, R.; Ochterski, J. W.; Martin, R. L.; Morokuma, K.; Farkas, O.; Foresman, J. B.; Fox, D. J. Gaussian, Inc., Wallingford CT, 2016.
- [5] Zhao, Y. & Truhlar, D. G. The M06 Suite of Density Functionals for Main Group Thermochemistry, Thermochemical Kinetics, Noncovalent Interactions, Excited States, and Transition Elements: Two New Functionals and Systematic Testing of Four M06-class Functionals and 12 other Functionals. *Theor. Chem. Acc.*, **120**, 215–241. (2007).
- [6] Weigend, F. & Ahlrichs, R. Balanced basis sets of split valence, triple zeta valence and quadruple zeta valence quality for H to Rn: Design and assessment of accuracy. *Phys. Chem. Chem. Phys.*, **7**, 3297-3305 (2005).
- [7] Fukui K. The Path of Chemical Reactions-The IRC Approach. *Acc. Chem. Res.*, **14**, **12**, 363–368. (1981).
- [8] Fukui K. Formulation of the Reaction Coordinate. *J. Phys. Chem.*, **74**, **23**, 4161–4163. (1970).

# NMR spectra

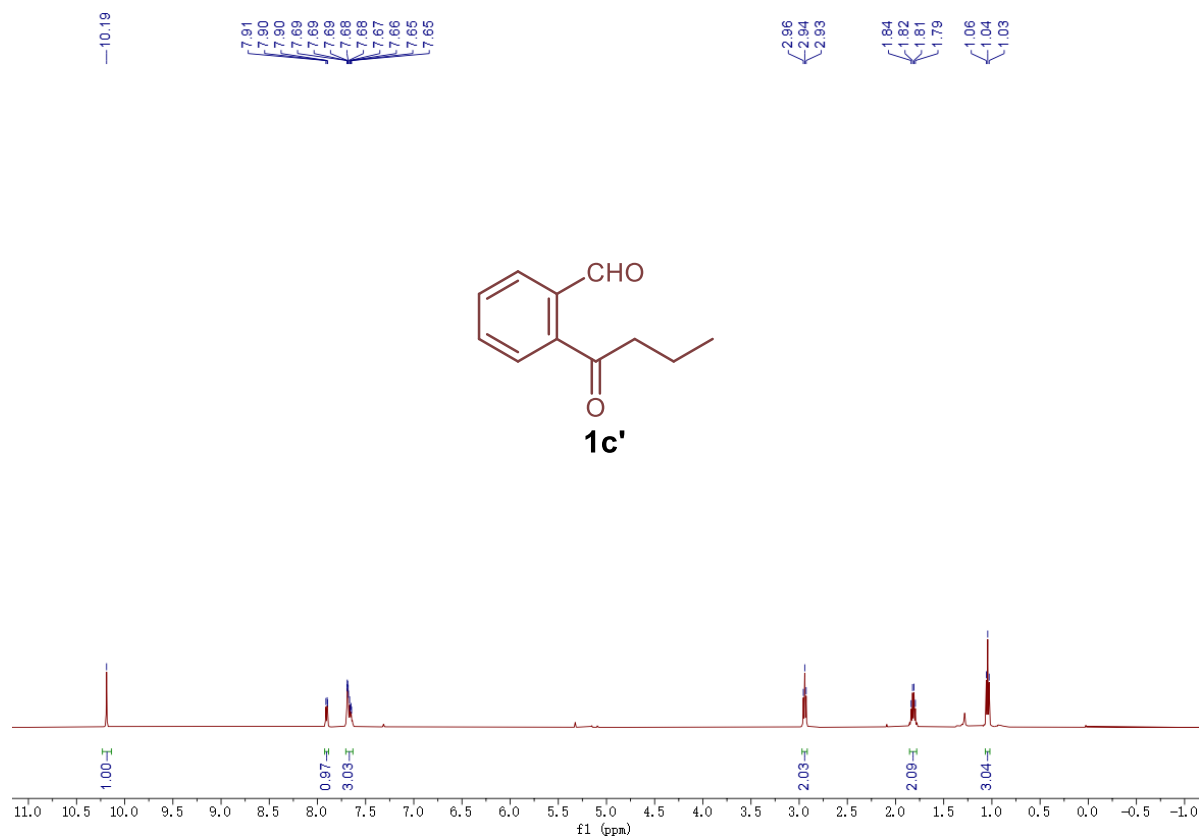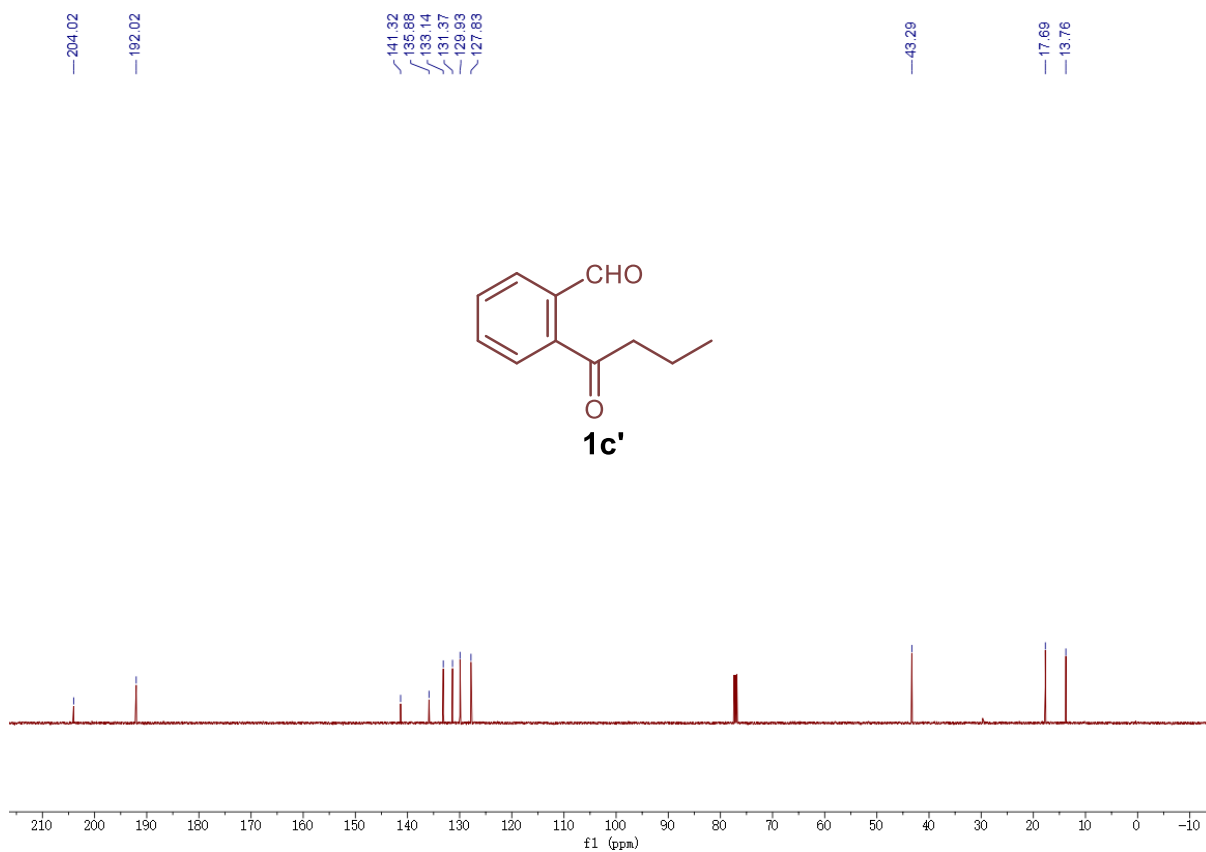

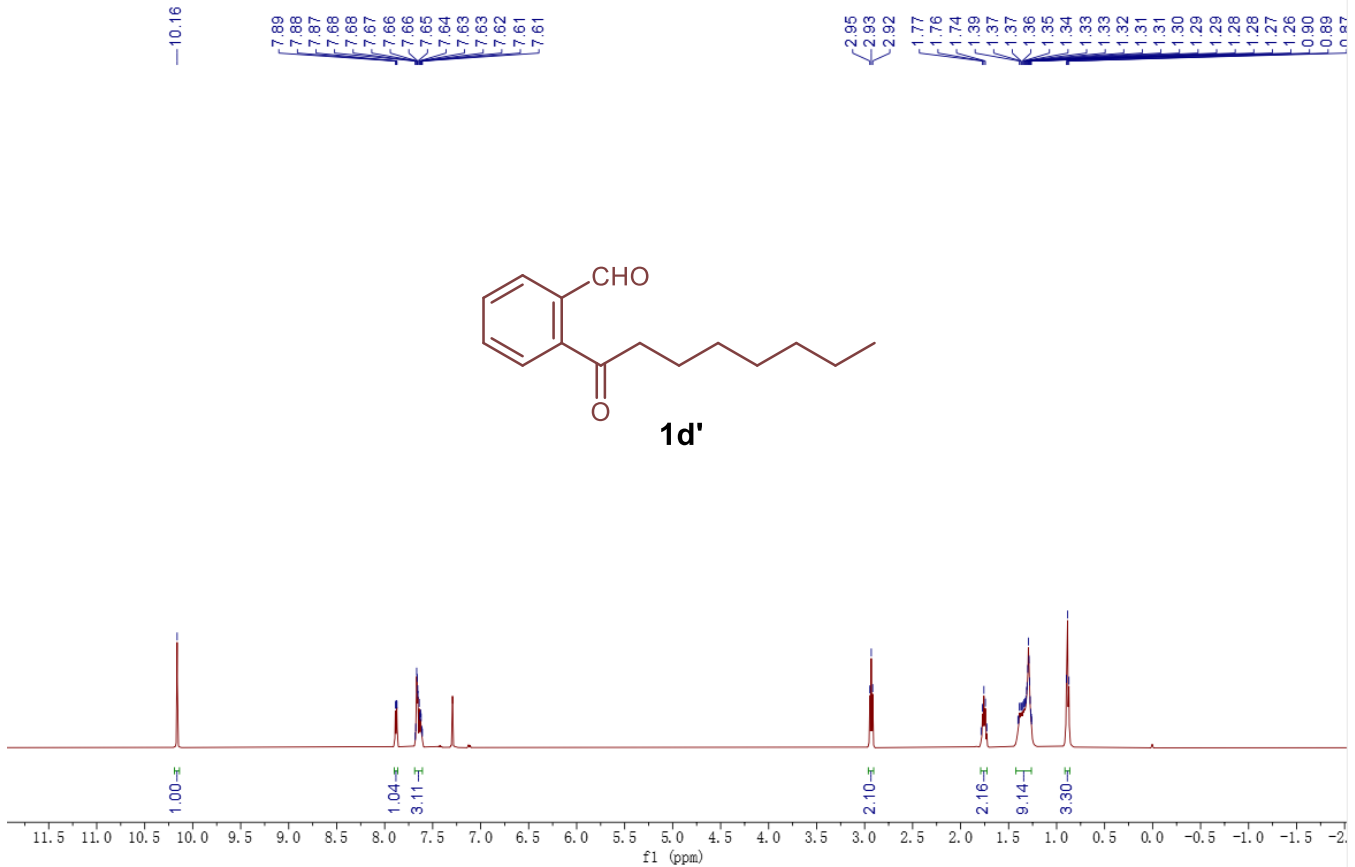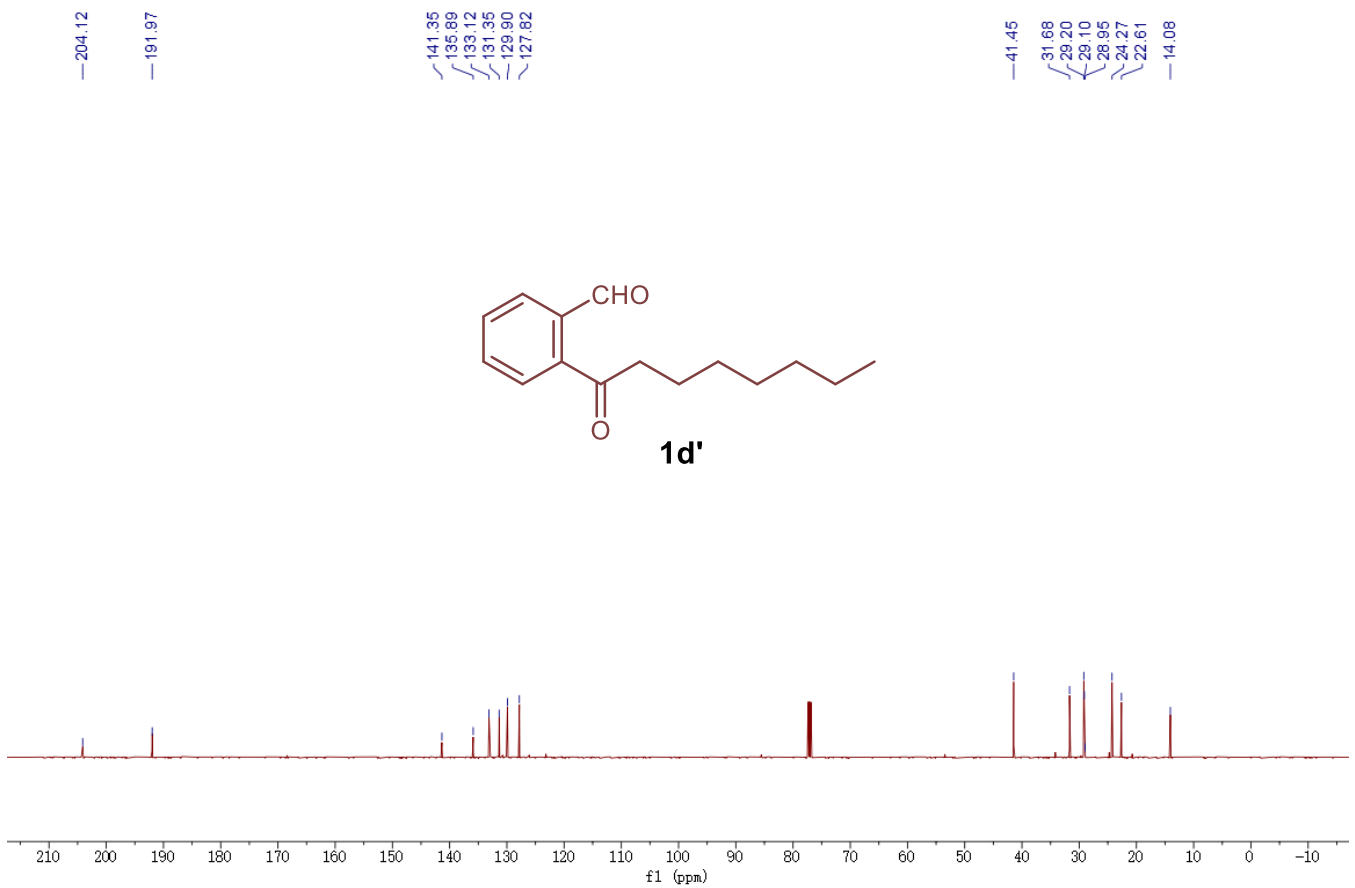

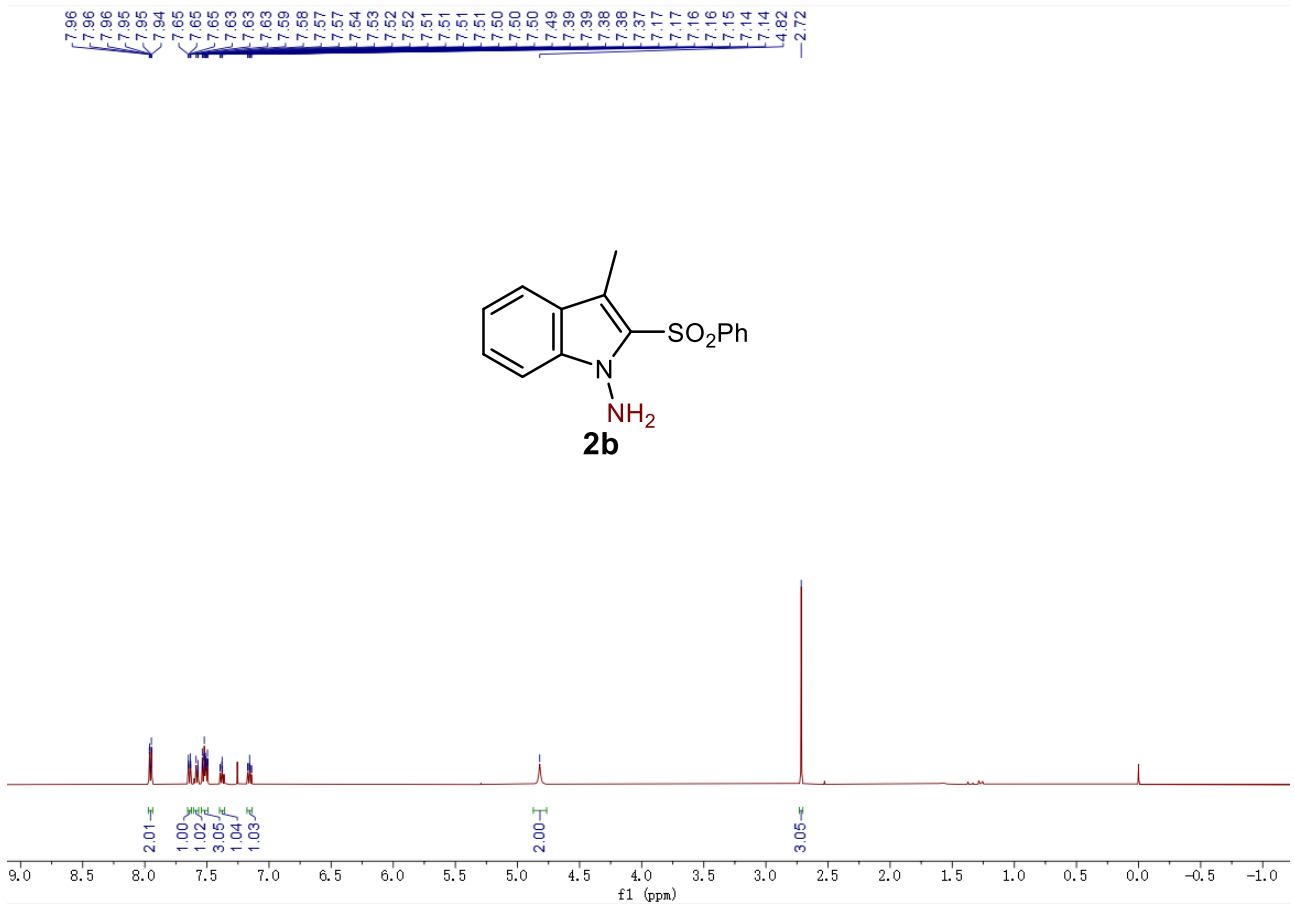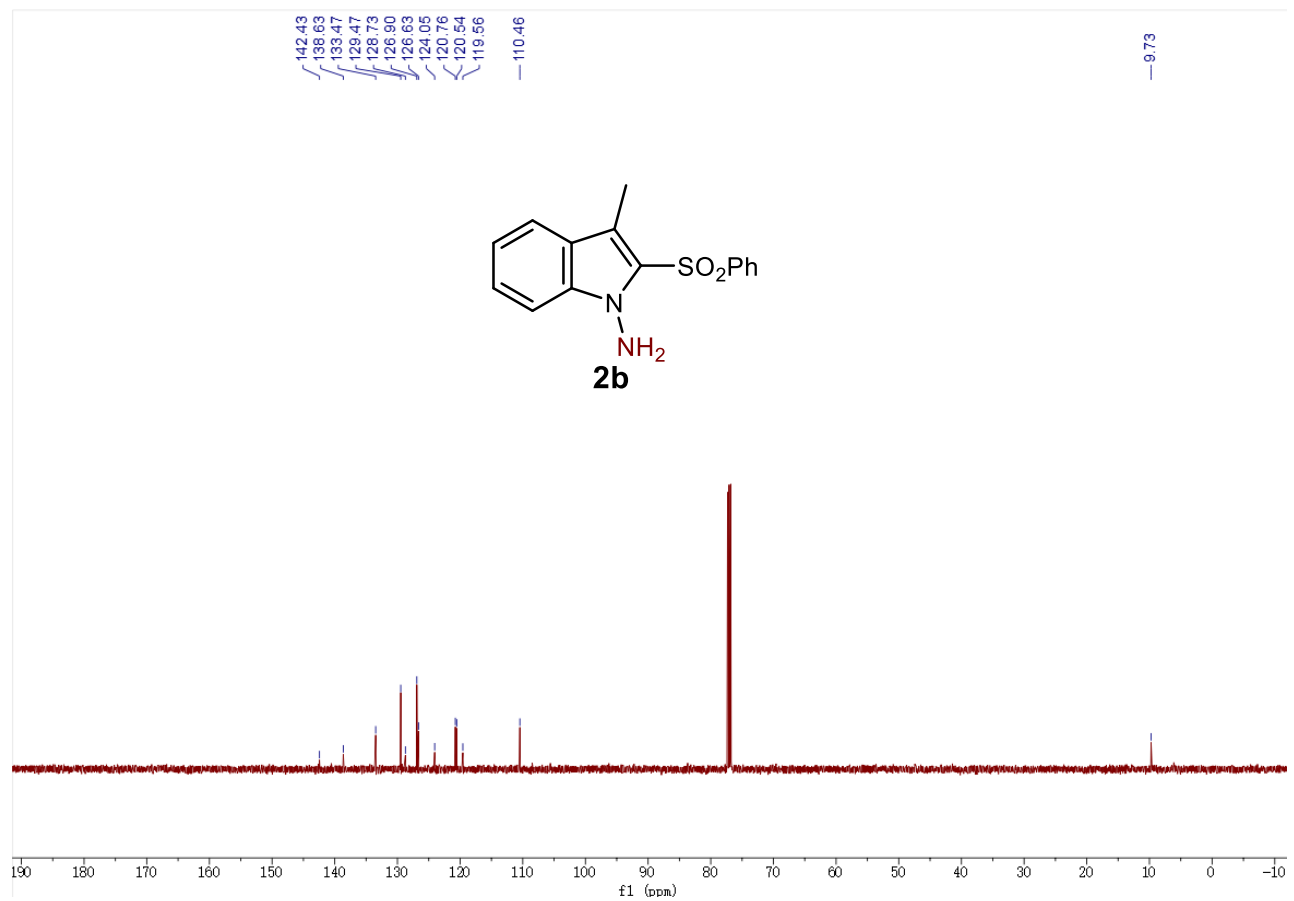

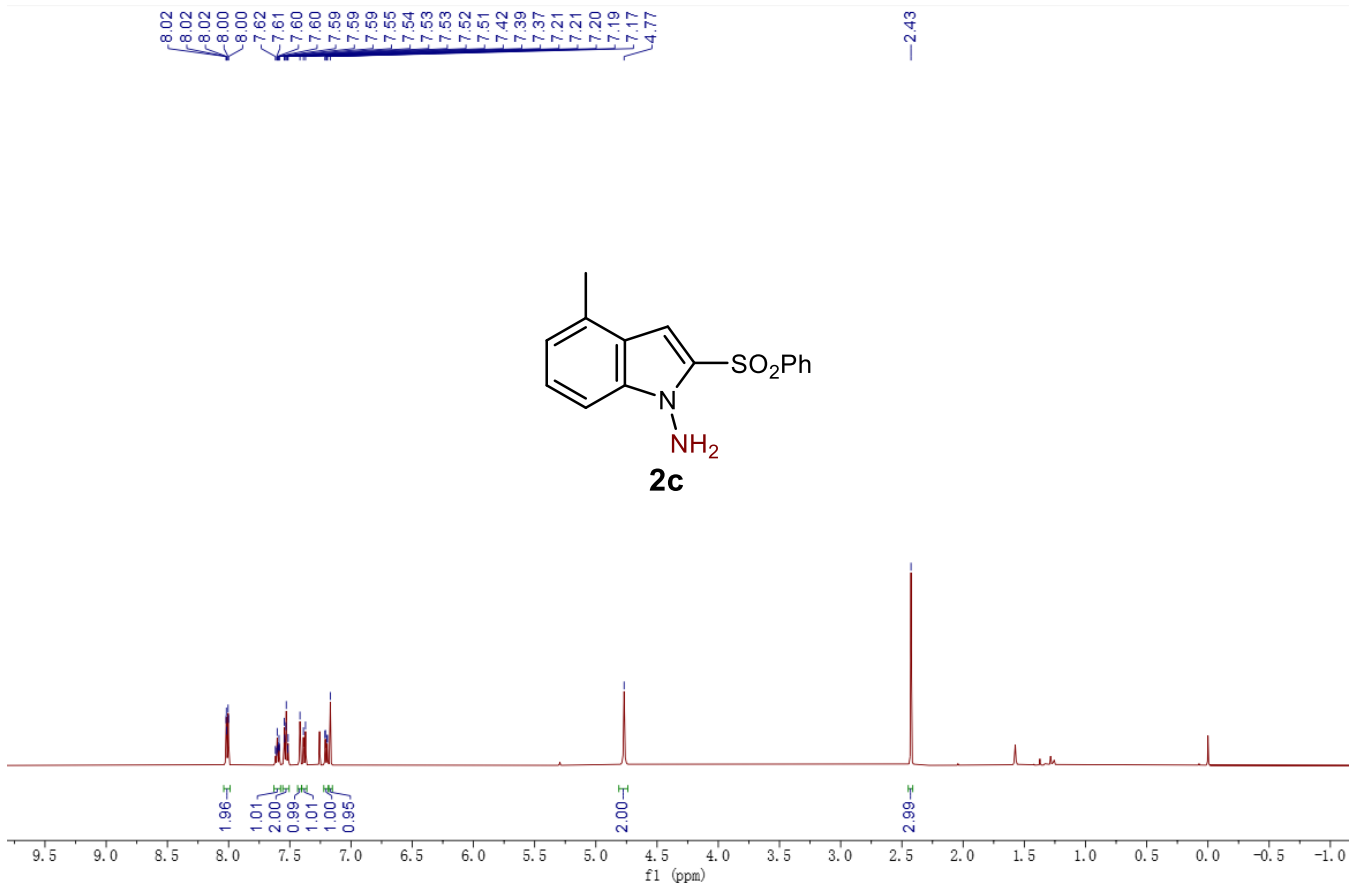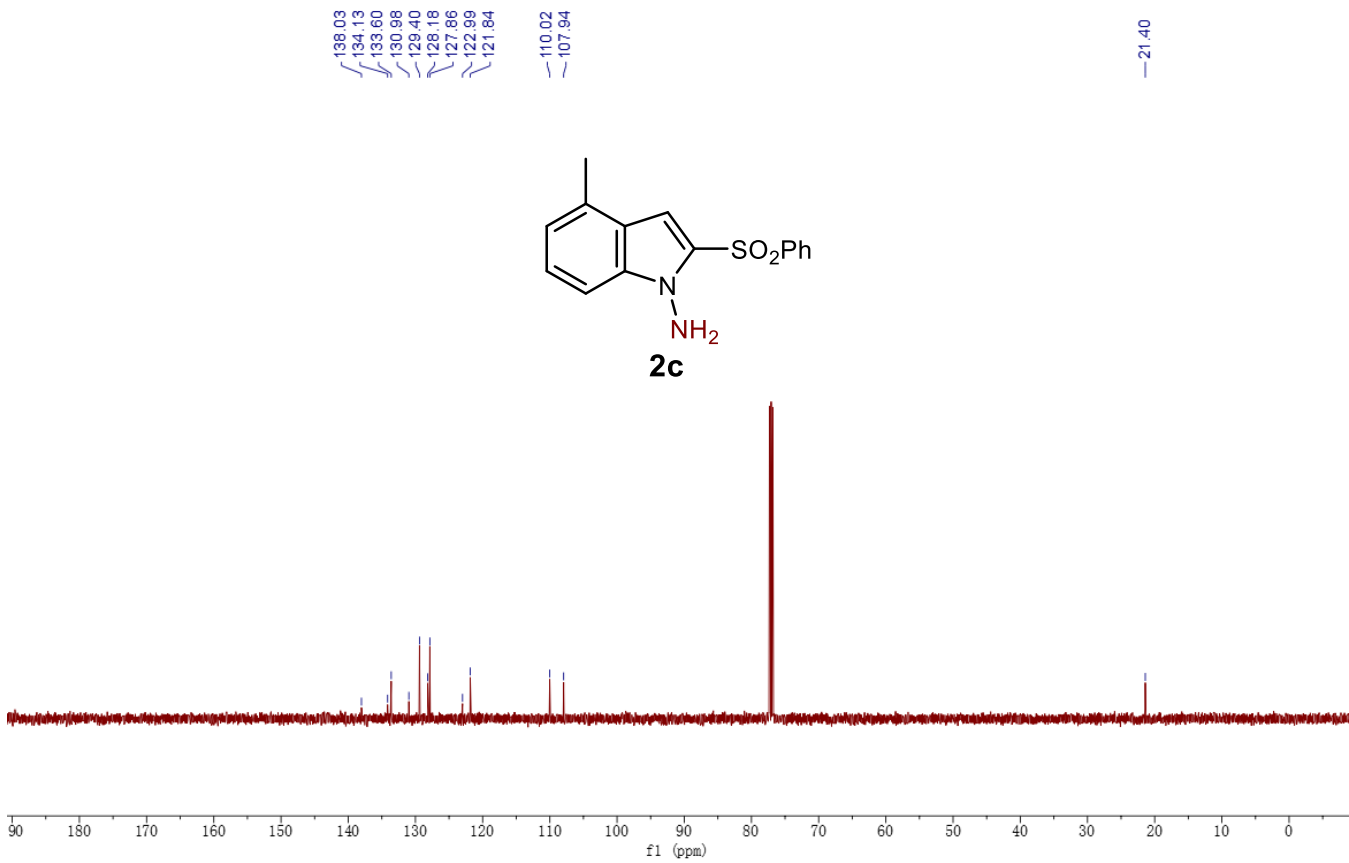

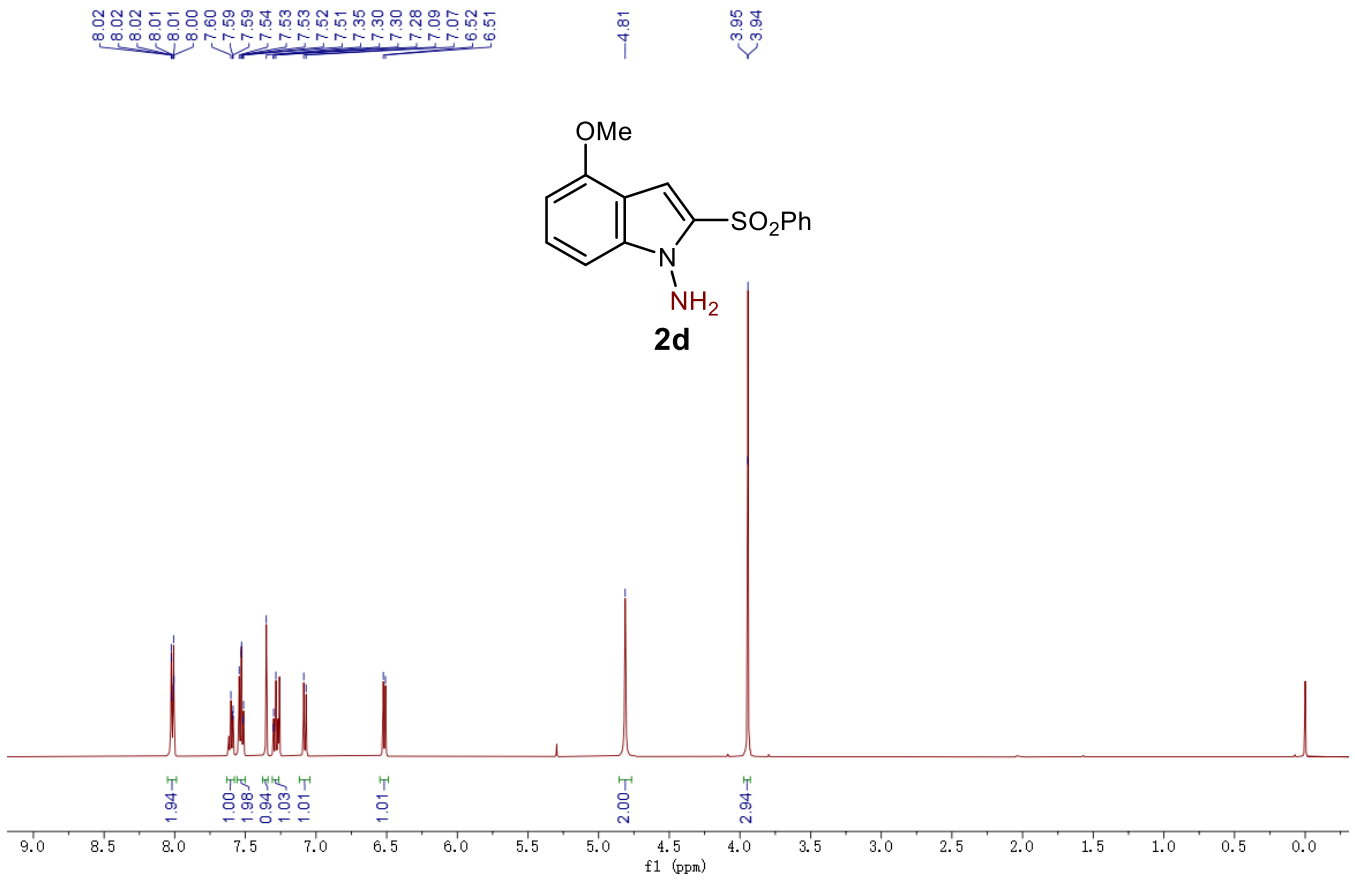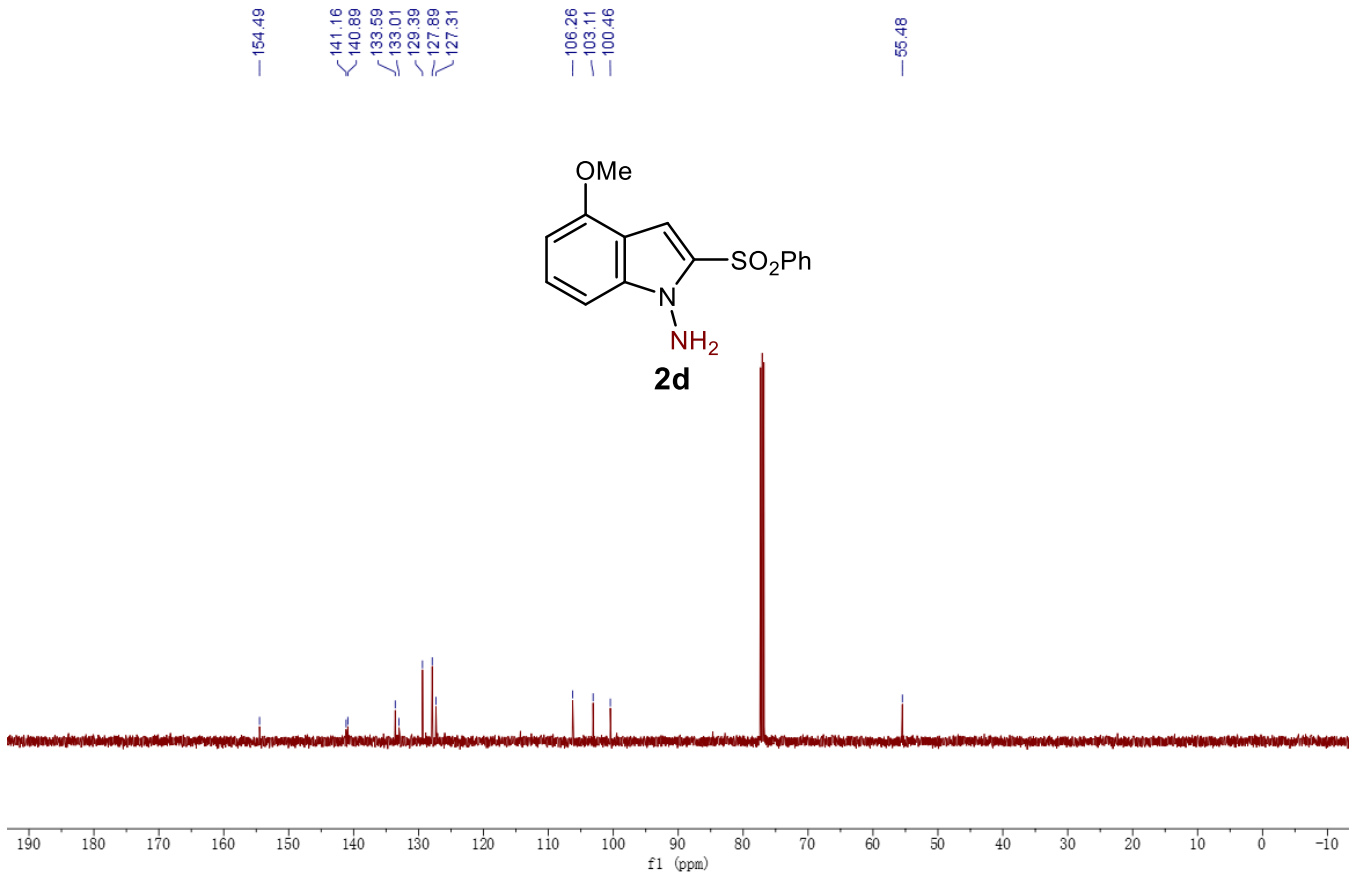



8.04  
8.04  
8.03  
8.03  
8.02  
7.66  
7.65  
7.64  
7.64  
7.63  
7.62  
7.58  
7.57  
7.56  
7.56  
7.55  
7.55  
7.29  
7.29  
7.28  
7.28  
6.84  
6.83  
6.83  
6.82  
6.82  
6.81  
6.81  
6.80  
6.80  
4.86

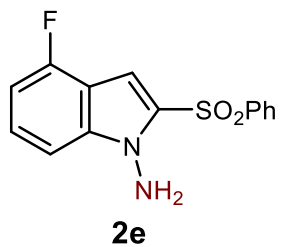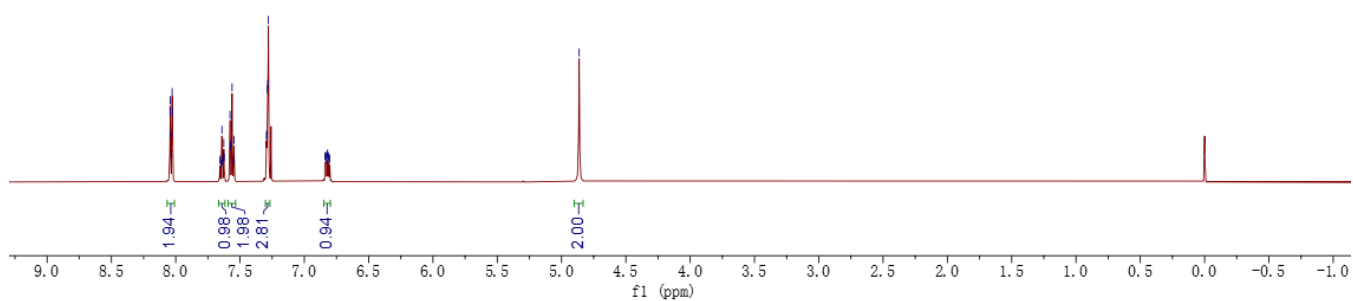

157.99  
155.99  
141.58  
141.50  
140.53  
134.91  
133.93  
129.51  
128.01  
126.78  
126.72  
112.73  
112.55  
106.50  
106.46  
105.86  
105.81  
104.28

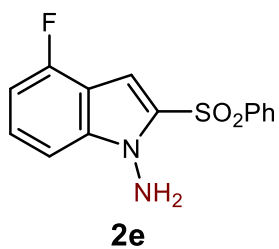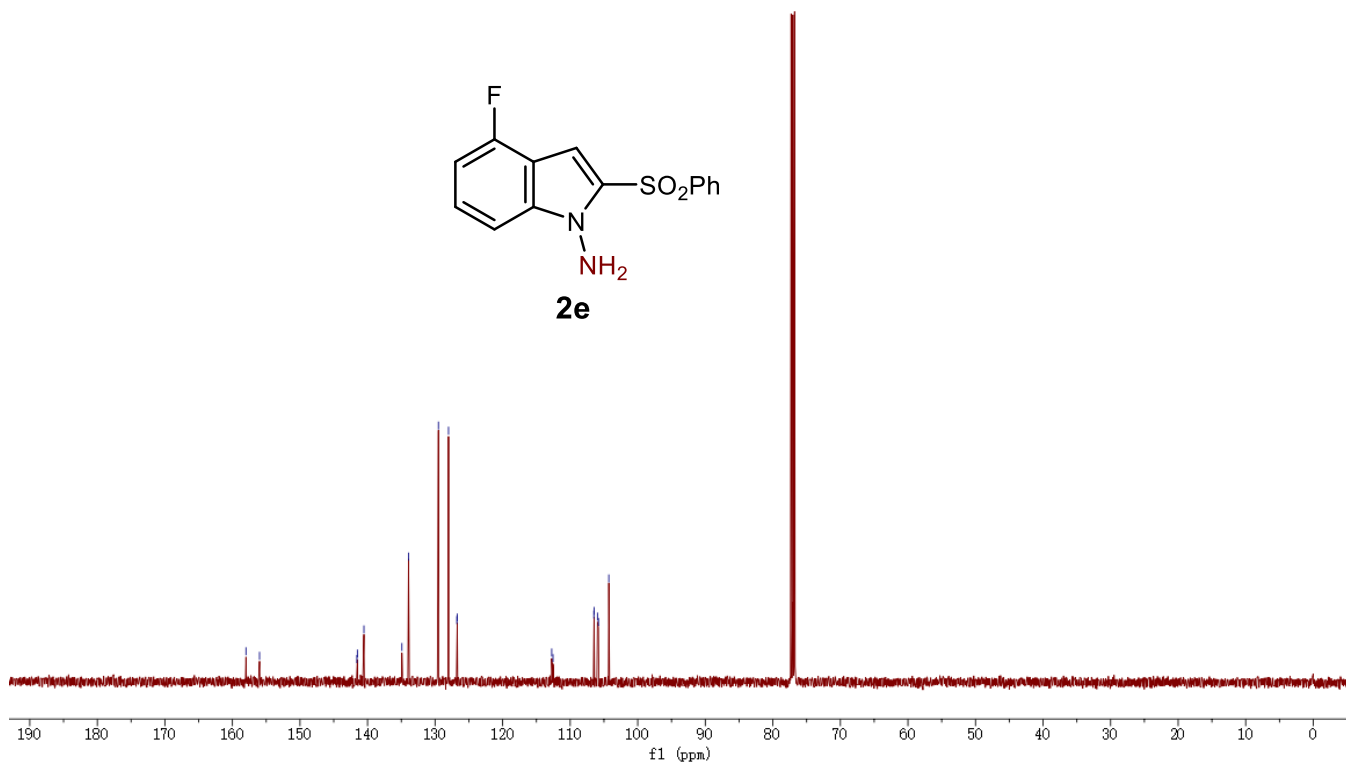

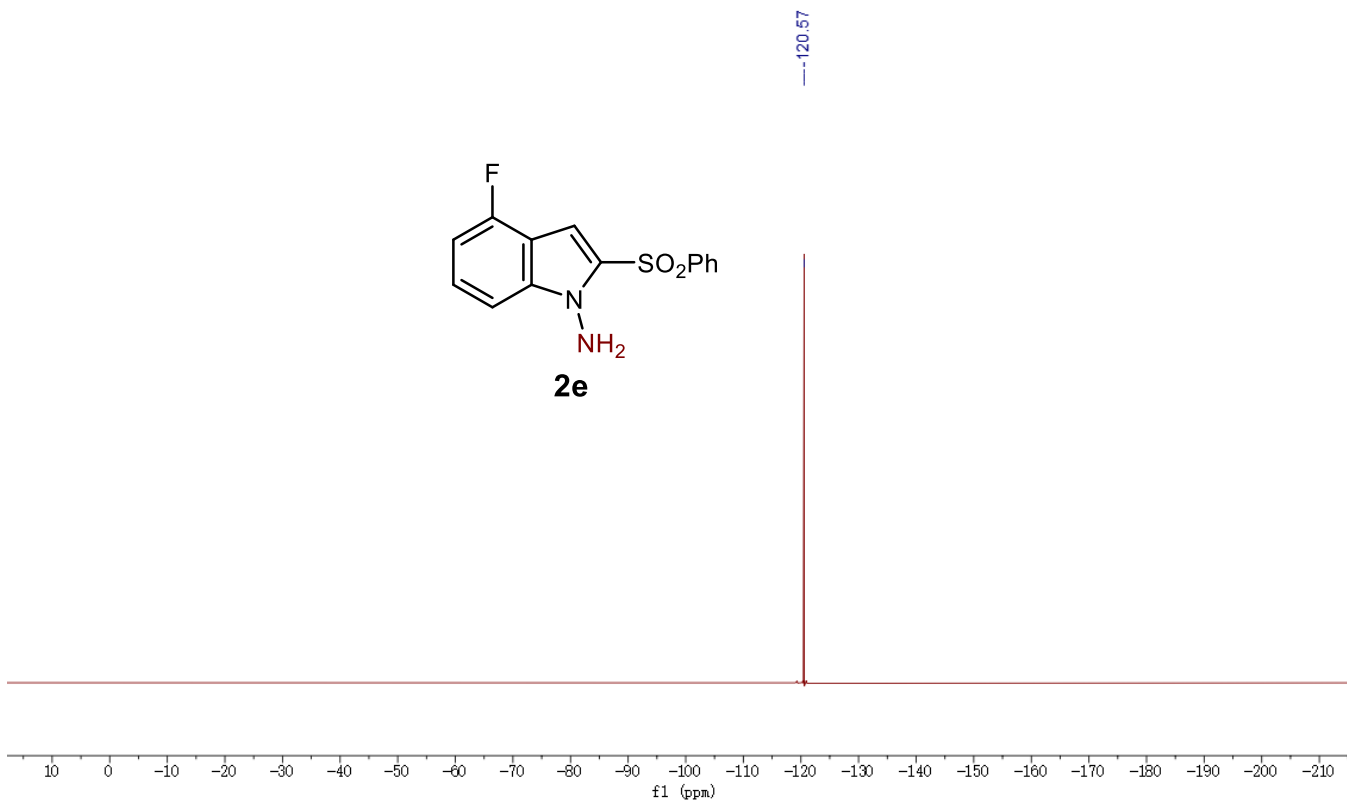

8.02  
8.01  
8.01  
8.00  
8.00  
8.00  
7.61  
7.60  
7.60  
7.59  
7.59  
7.58  
7.58  
7.54  
7.54  
7.54  
7.53  
7.52  
7.51  
7.51  
7.41  
7.38  
7.37  
7.21  
7.21  
7.19  
7.19  
7.16  
4.77

2.42

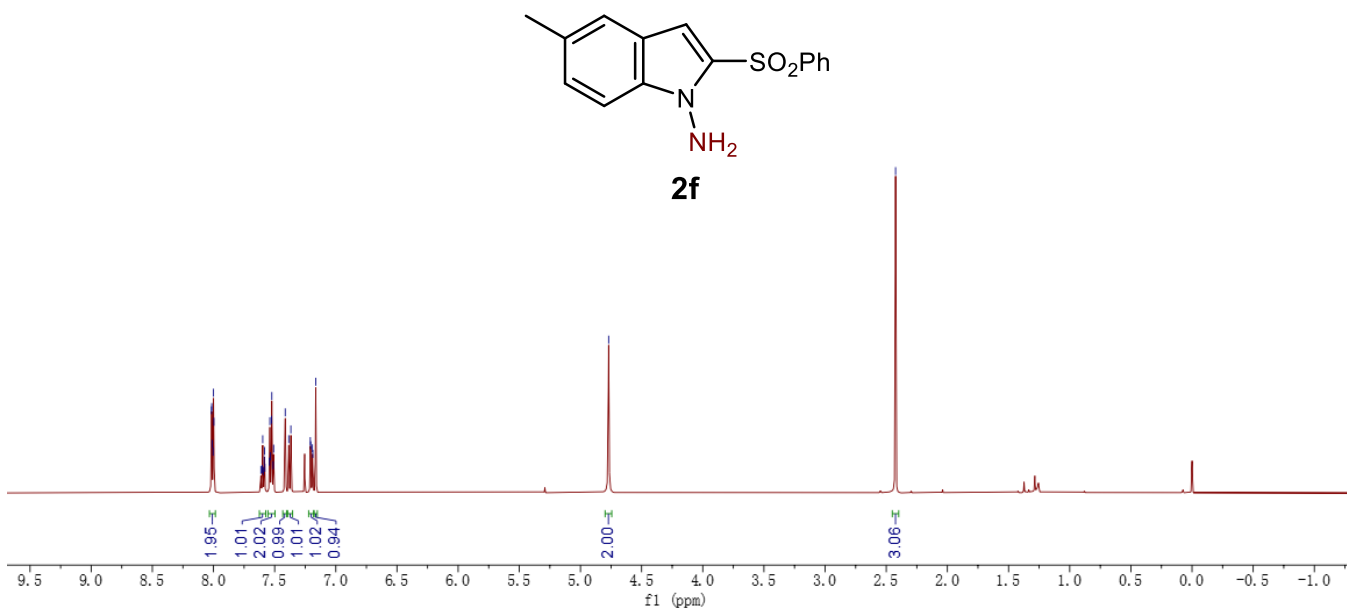

141.11  
138.00  
134.12  
133.57  
130.94  
129.36  
128.15  
127.83  
122.96  
121.81  
109.99  
107.90

—21.37

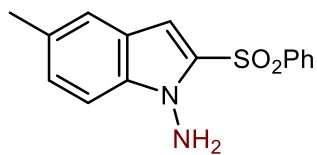

**2f**

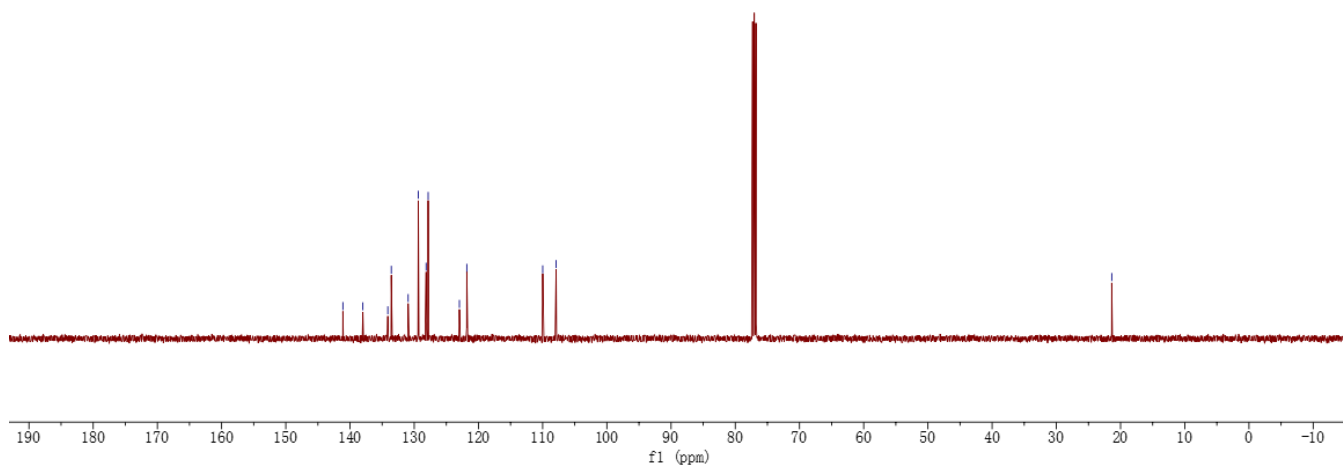

8.02  
8.02  
8.02  
8.01  
7.61  
7.60  
7.56  
7.55  
7.54  
7.53  
7.41  
7.39  
7.17  
7.06  
7.05  
7.04  
7.03  
7.03  
7.02  
4.79  
3.83

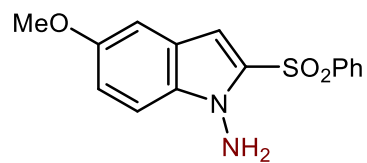

**2g**

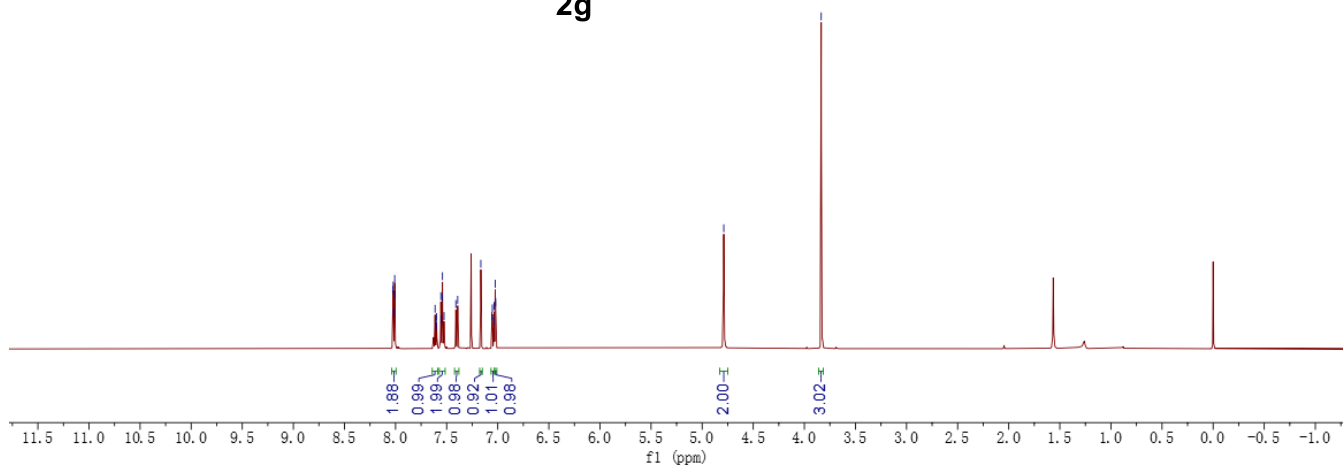

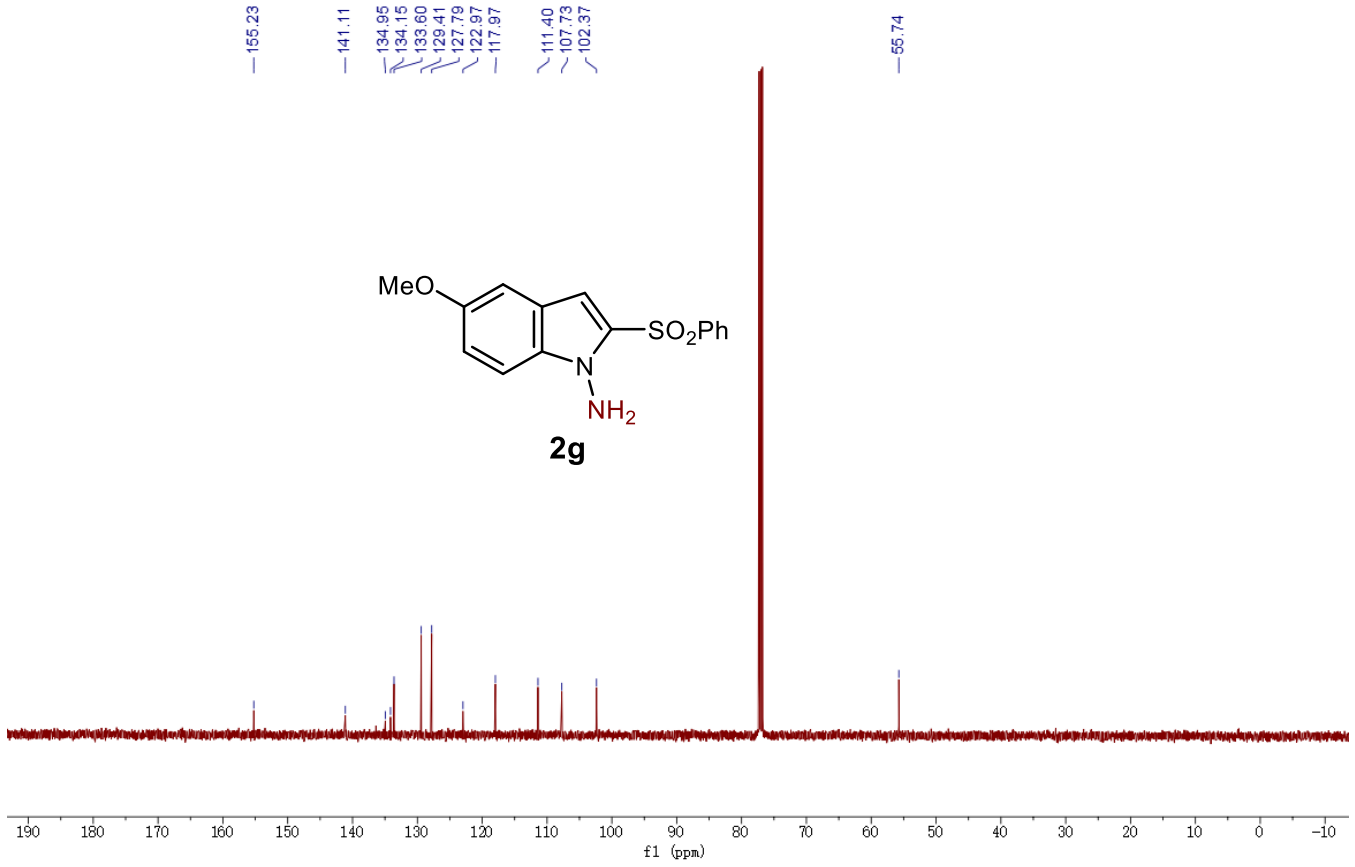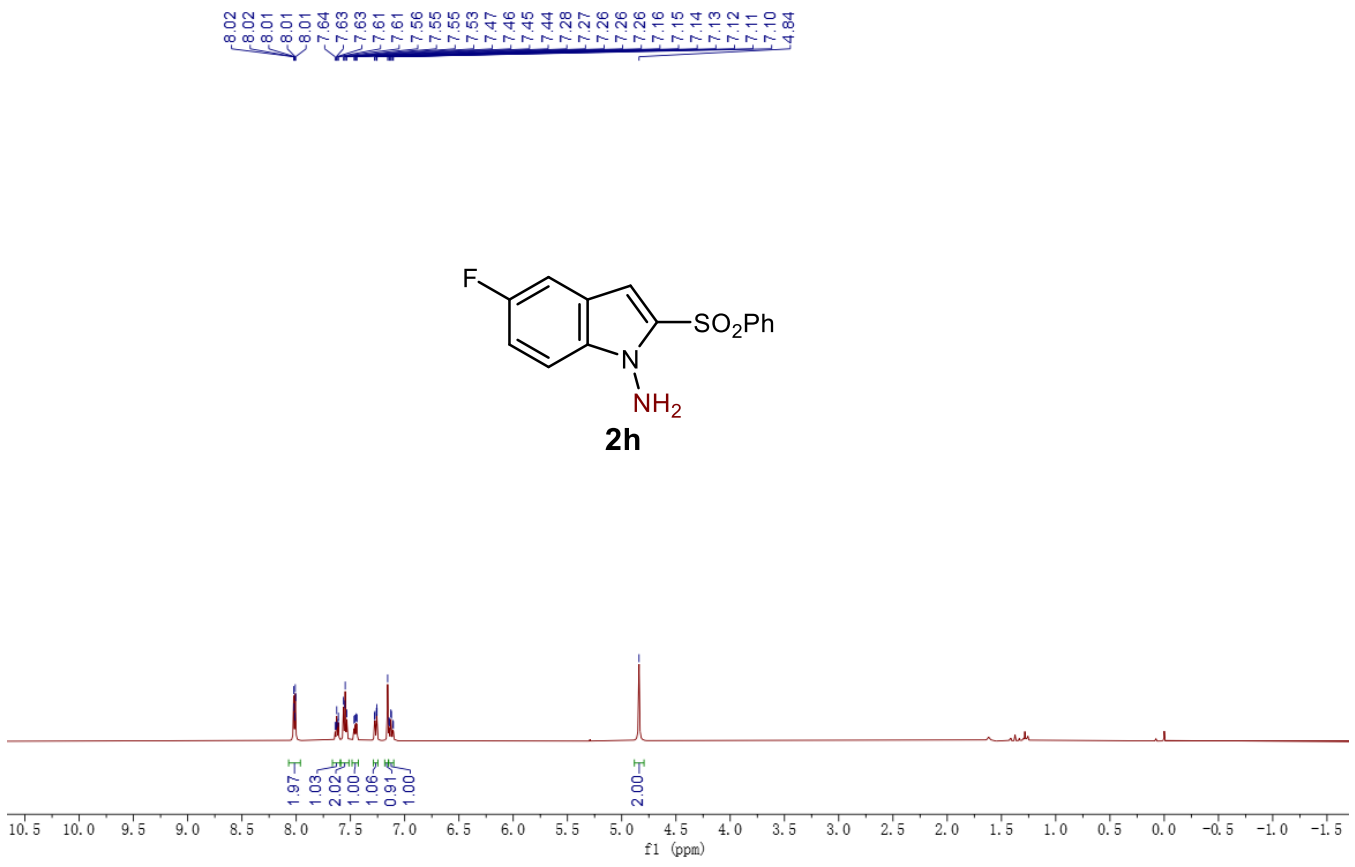

159.41  
157.52

140.66  
136.14  
135.68  
133.87  
129.50  
127.92  
122.66  
122.58  
115.50  
115.29  
111.73  
111.66  
107.79  
107.75  
106.92  
106.73

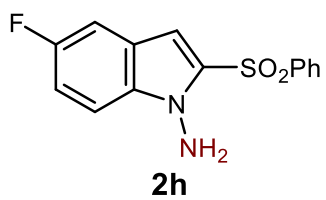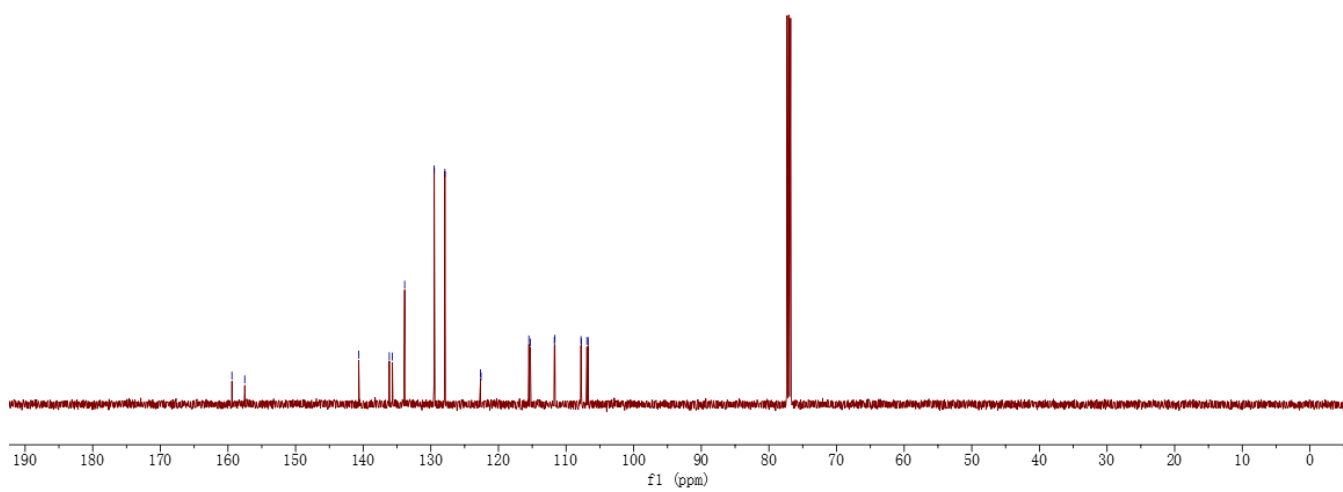

121.69

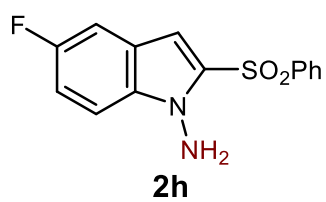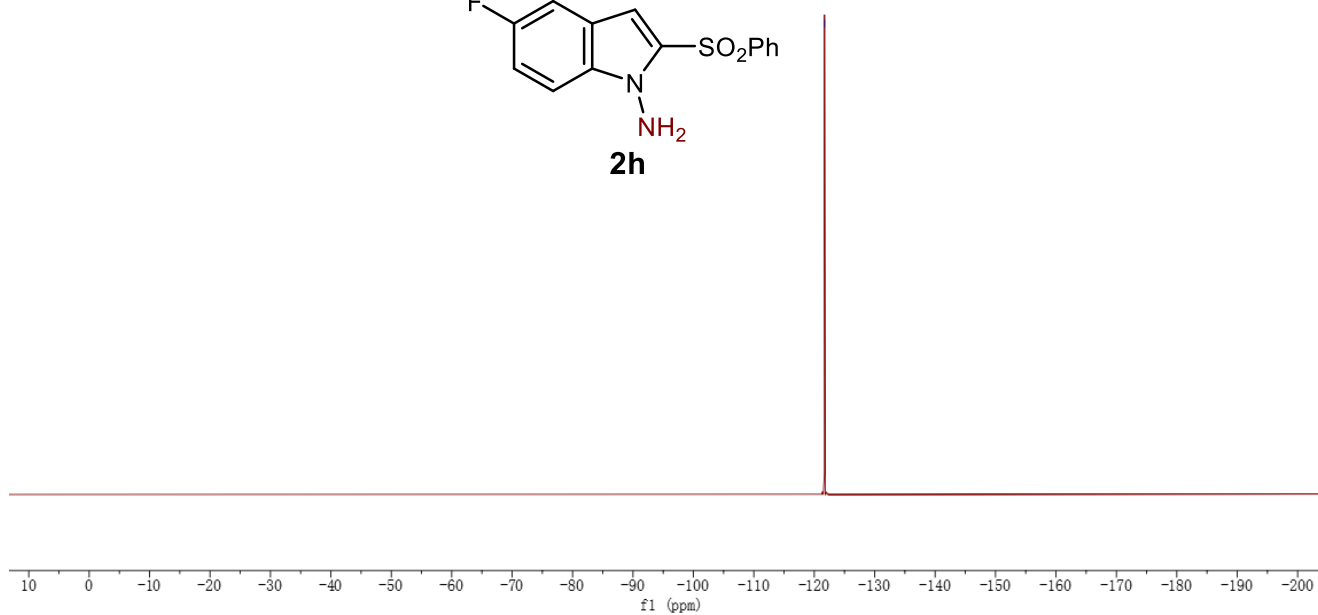

8.03  
8.02  
8.02  
8.01  
8.01  
7.78  
7.78  
7.64  
7.63  
7.63  
7.63  
7.58  
7.58  
7.57  
7.56  
7.55  
7.55  
7.46  
7.45  
7.44  
7.44  
7.41  
7.39  
7.15

4.83

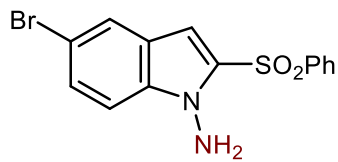

2i

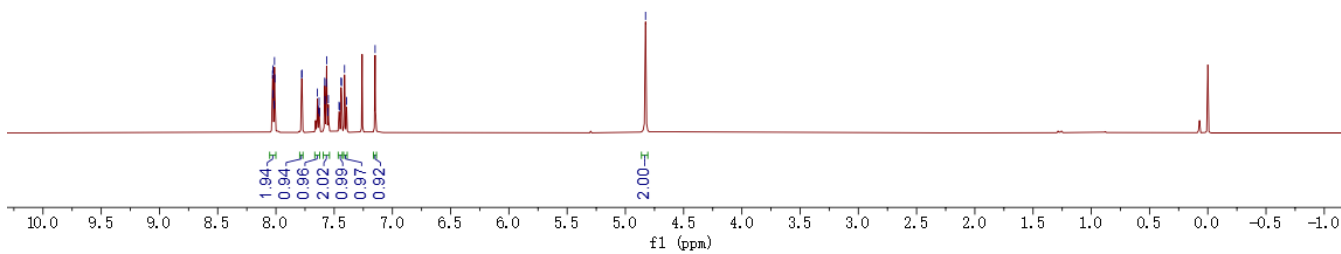

140.56  
138.09  
135.48  
133.95  
129.55  
129.22  
127.83  
124.88  
124.02  
114.61  
112.11  
107.38

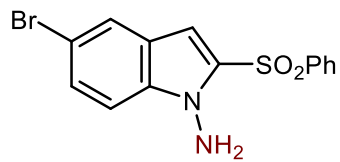

2i

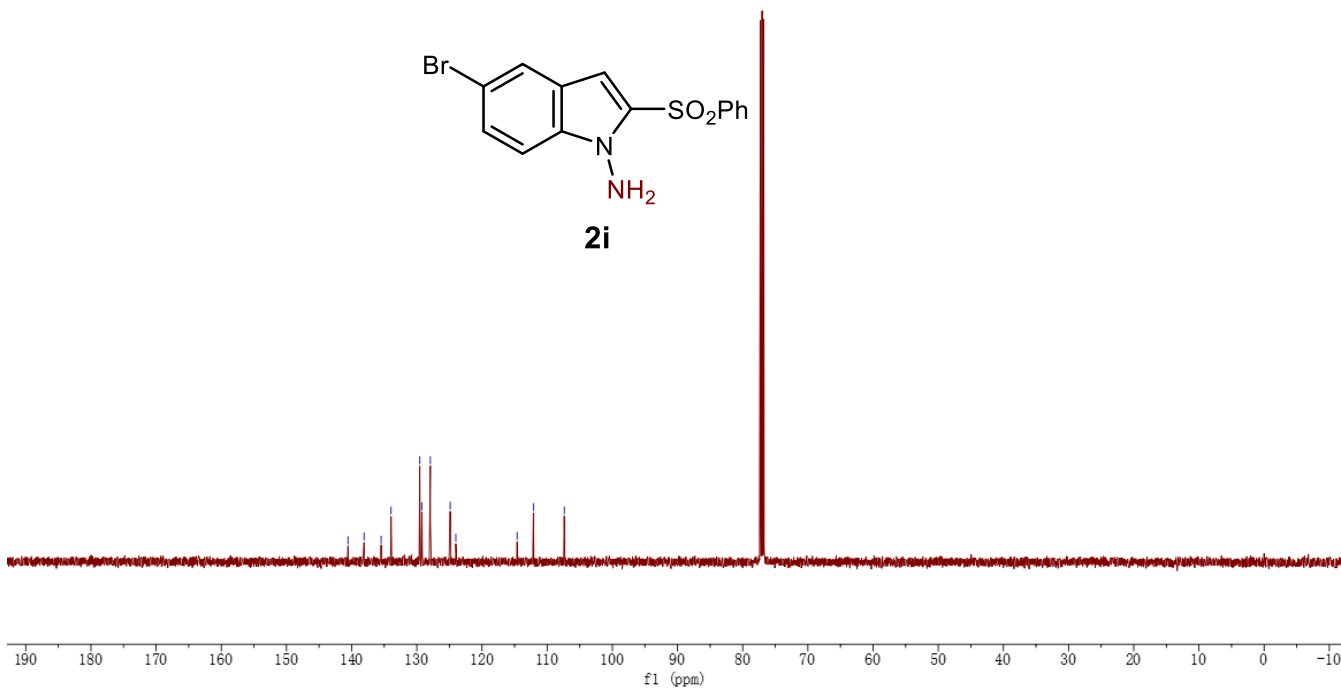

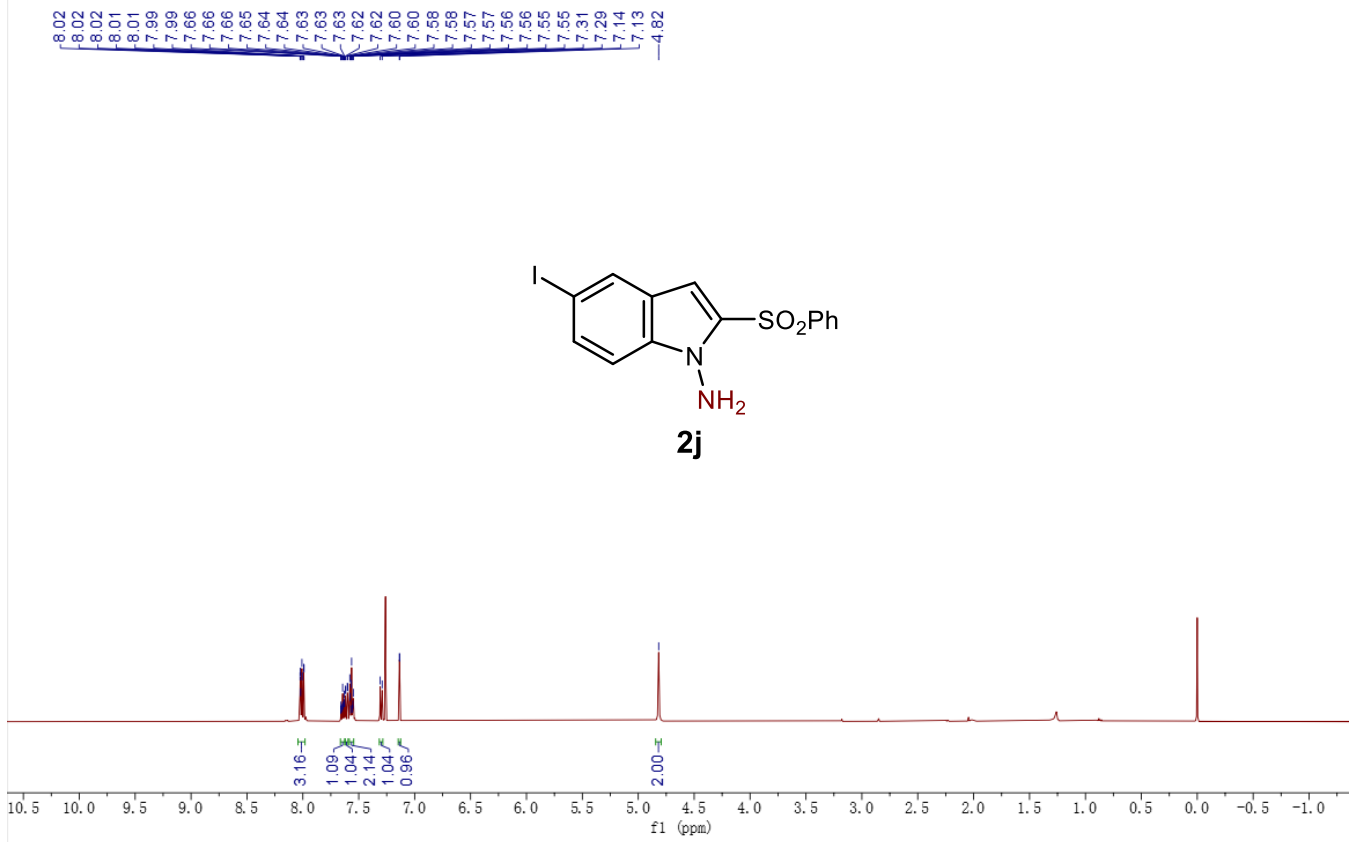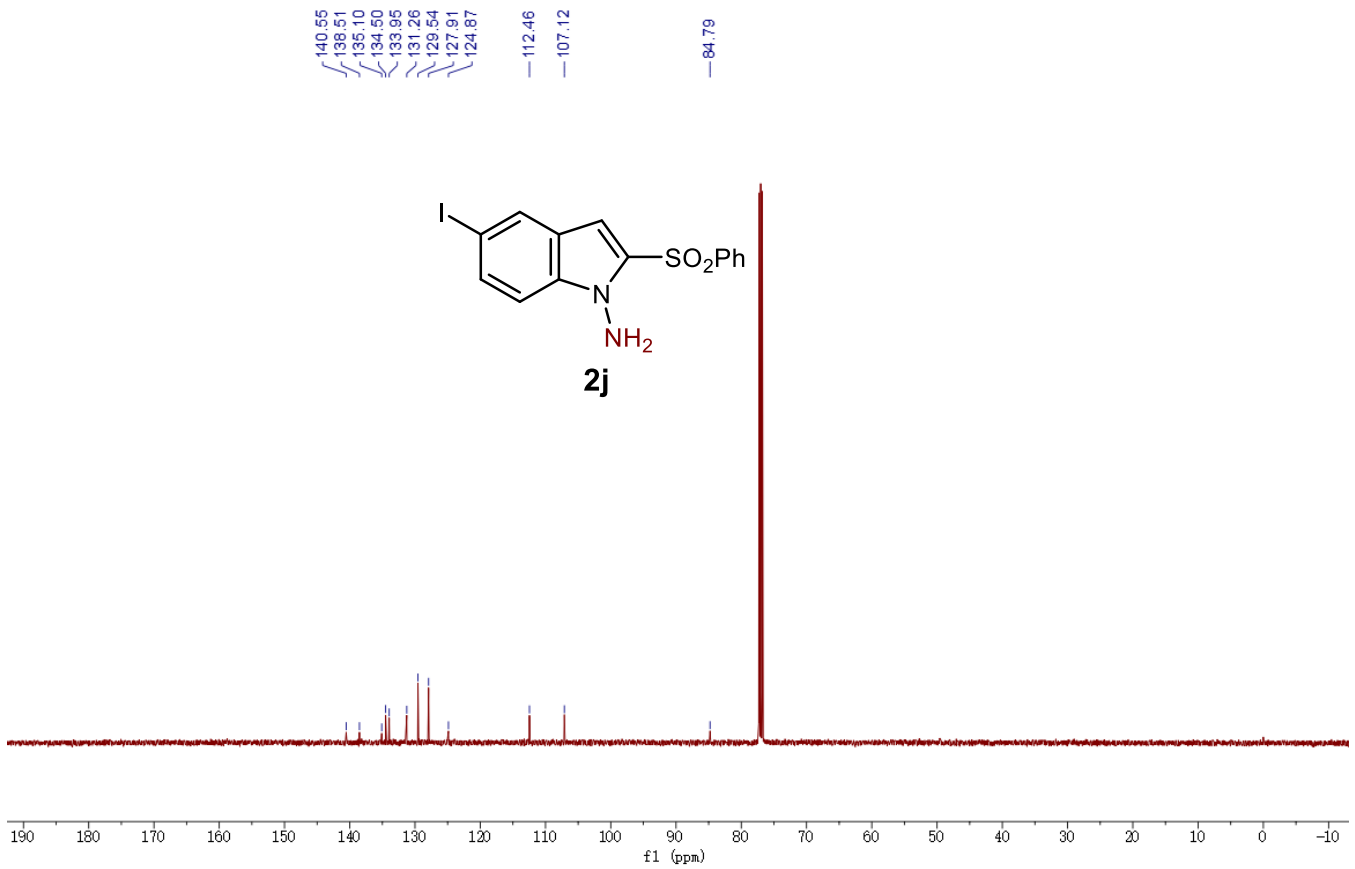

8.05  
8.05  
8.05  
8.04  
8.03  
7.84  
7.84  
7.65  
7.64  
7.63  
7.63  
7.62  
7.61  
7.61  
7.61  
7.59  
7.59  
7.58  
7.57  
7.57  
7.56  
7.56  
7.46  
7.45  
7.44  
7.43  
7.43  
7.35  
7.35  
7.34  
7.34  
7.32  
7.32  
7.30  
7.30  
4.84

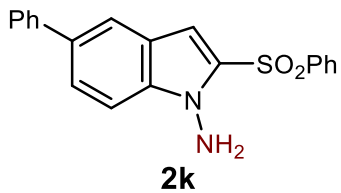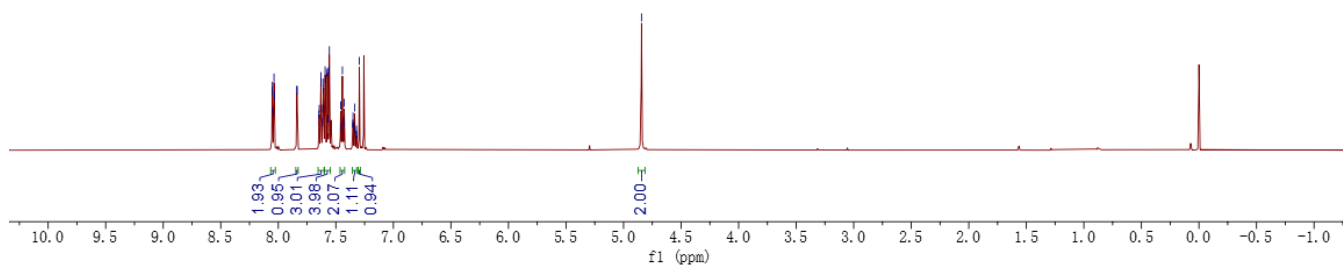

141.44  
140.92  
136.97  
135.16  
134.91  
133.74  
129.46  
128.81  
127.89  
127.33  
126.93  
126.22  
123.17  
120.81  
110.69  
106.70

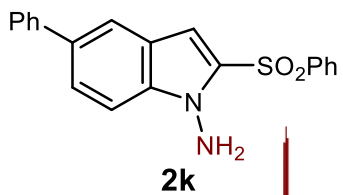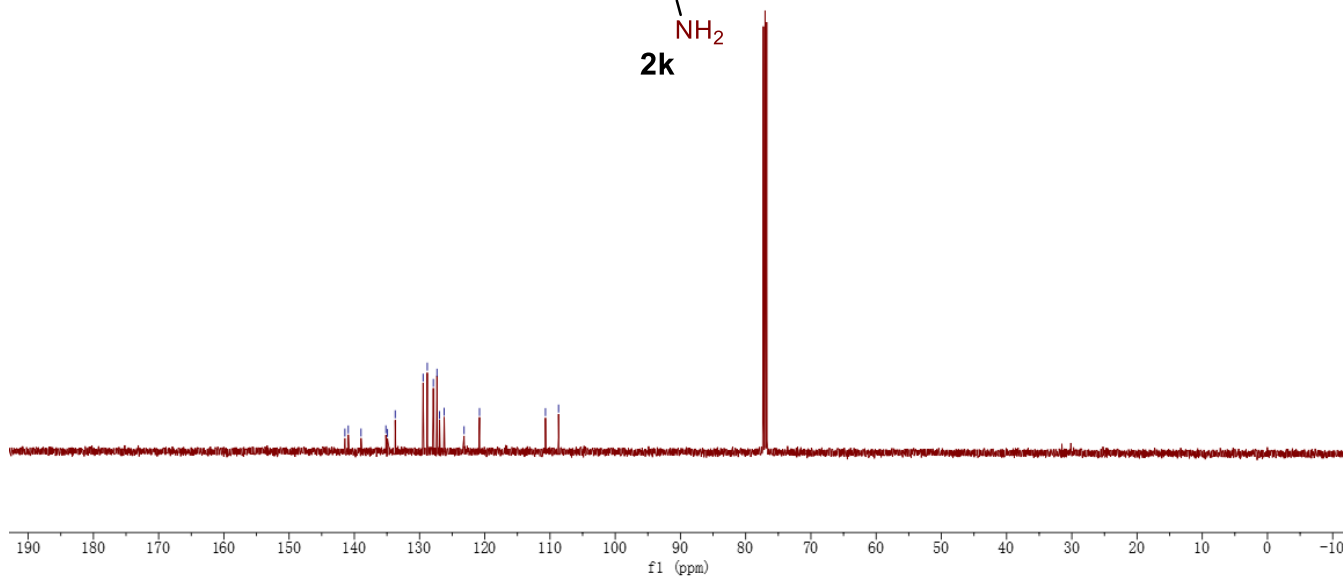



8.02  
8.01  
8.01  
8.00  
8.00  
7.62  
7.62  
7.61  
7.60  
7.60  
7.59  
7.59  
7.58  
7.55  
7.55  
7.53  
7.53  
7.52  
7.51  
7.29  
7.21  
7.01  
7.01  
7.00  
6.99  
4.76

-2.47

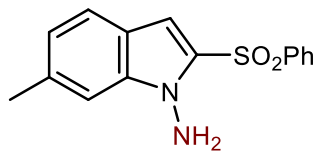

2I

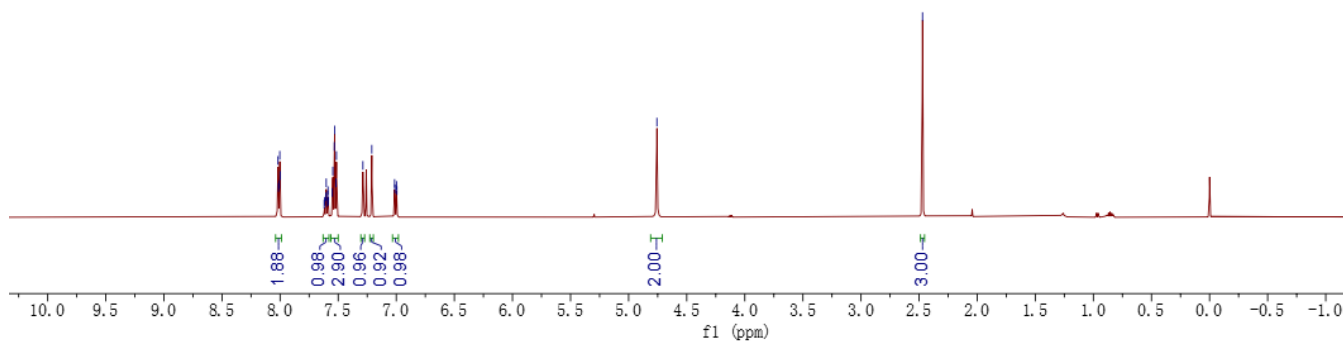

141.18  
139.93  
136.67  
133.54  
129.37  
123.64  
122.24  
120.69  
109.86  
108.56

-22.10

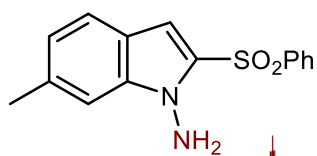

2I

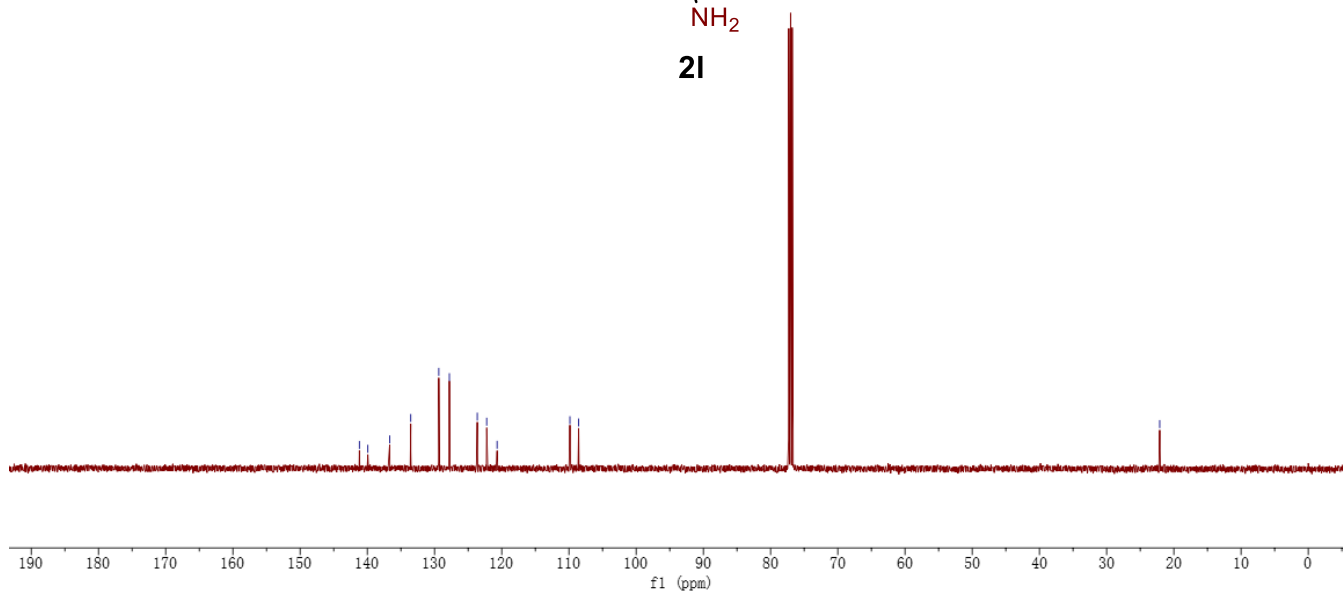

8.00  
8.00  
7.98  
7.98  
7.61  
7.60  
7.60  
7.59  
7.59  
7.58  
7.58  
7.54  
7.54  
7.53  
7.53  
7.52  
7.51  
7.51  
7.50  
7.48  
7.19  
7.19  
6.90  
6.90  
6.83  
6.82  
6.81  
6.80  
4.78  
3.65

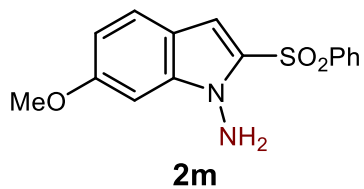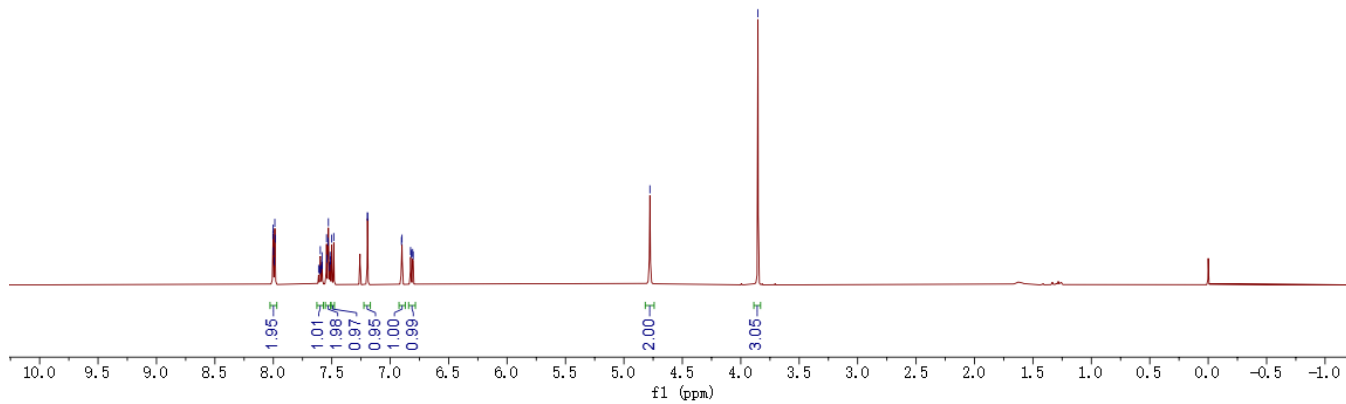

159.54  
141.36  
140.84  
133.48  
132.55  
129.42  
127.63  
123.49  
116.94  
113.45  
109.18  
91.85  
55.56

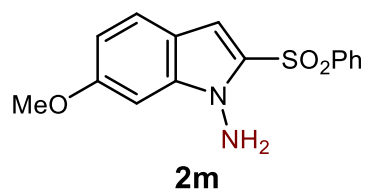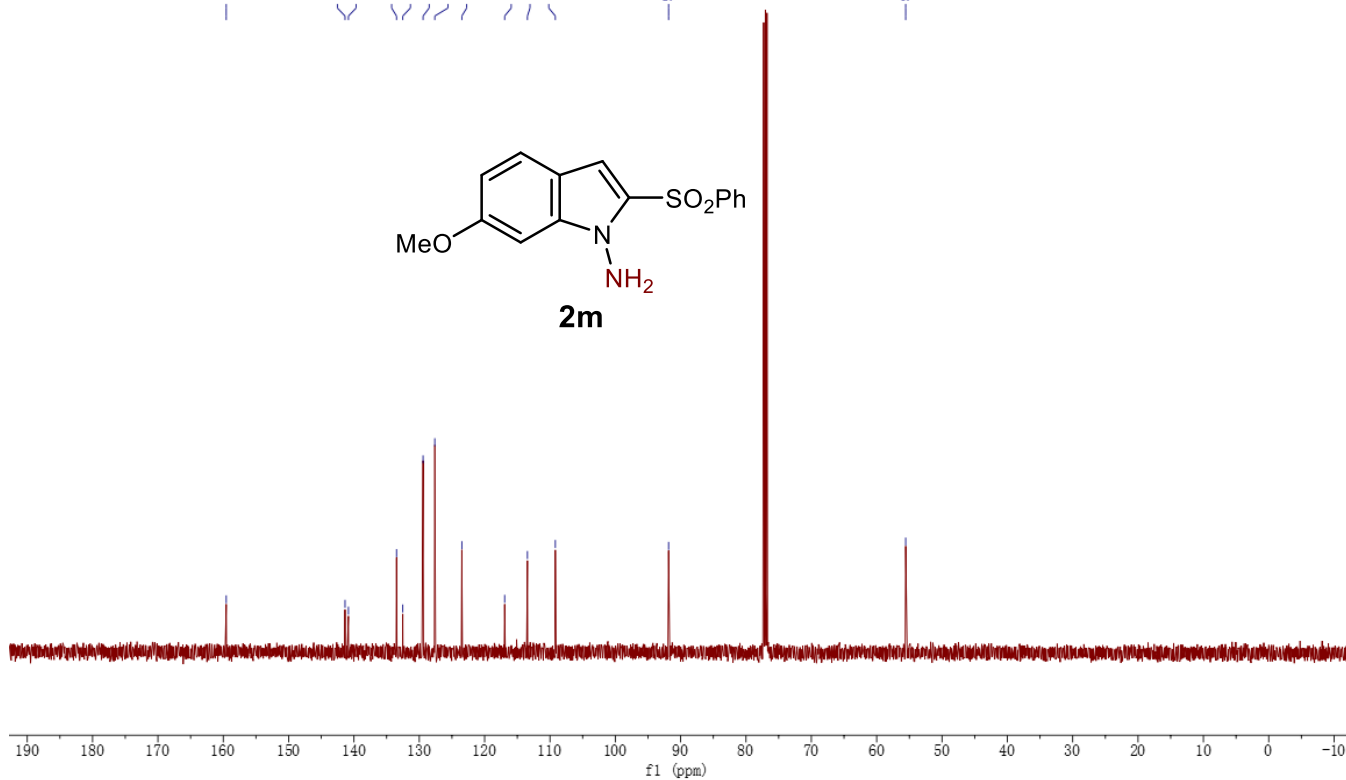

7.87  
7.87  
7.86  
7.85  
7.80  
7.60  
7.58  
7.58  
7.39  
7.39  
7.37  
7.37  
7.33  
7.32  
7.27  
7.27  
7.26  
7.25  
7.24  
7.08  
7.06  
7.06  
7.05  
7.05  
-6.89

-2.28

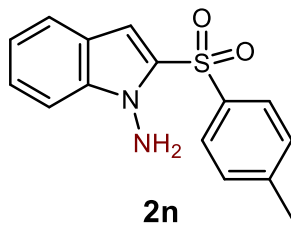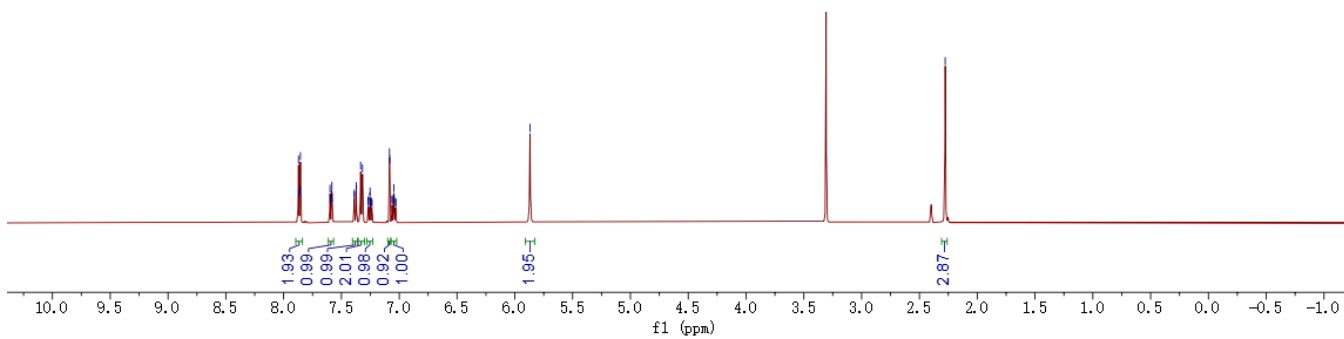

144.63  
139.33  
138.57  
136.36  
130.12  
128.72  
125.48  
122.91  
122.73  
121.39  
111.37  
106.13

-21.54

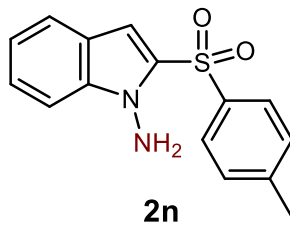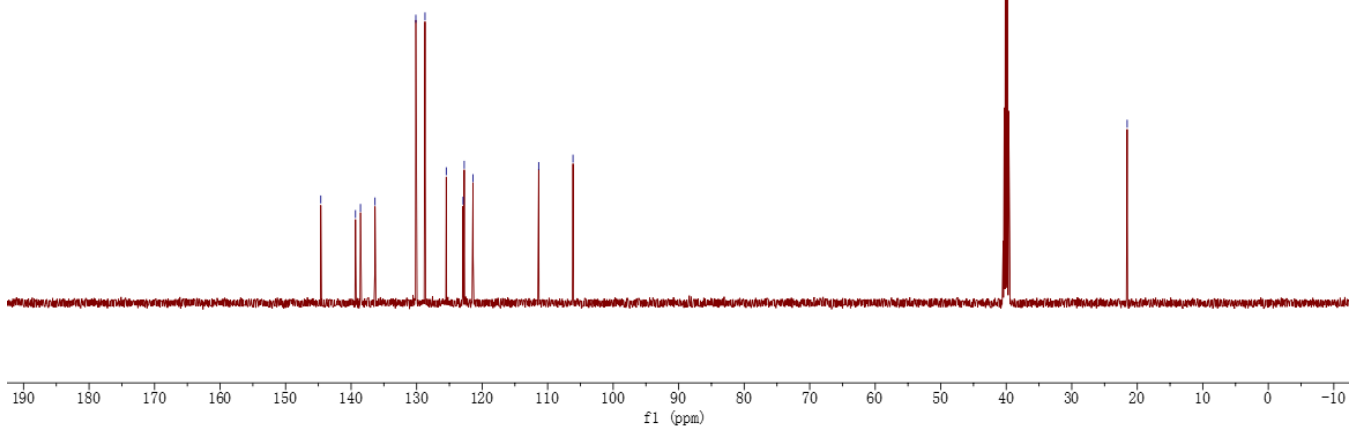

8.07  
8.06  
8.06  
8.05  
8.04  
7.65  
7.64  
7.49  
7.47  
7.40  
7.40  
7.39  
7.38  
7.38  
7.37  
7.37  
7.22  
7.22  
7.20  
7.20  
7.19  
7.19  
7.18  
7.18  
7.17  
7.17  
4.80

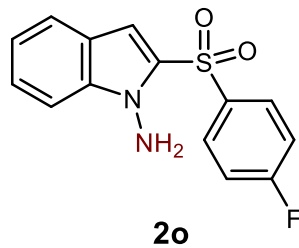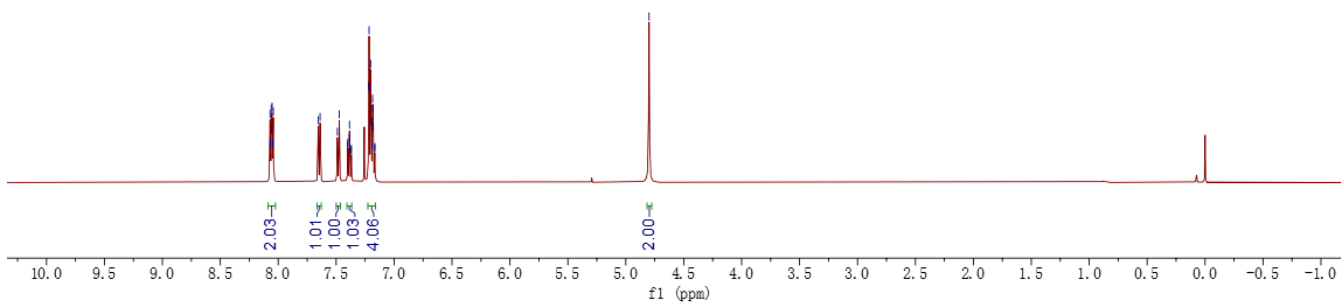

166.71  
164.66  
139.42  
137.02  
137.00  
134.43  
131.00  
130.93  
126.26  
122.77  
122.70  
121.62  
116.72  
116.54  
110.12  
108.31

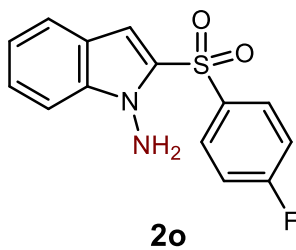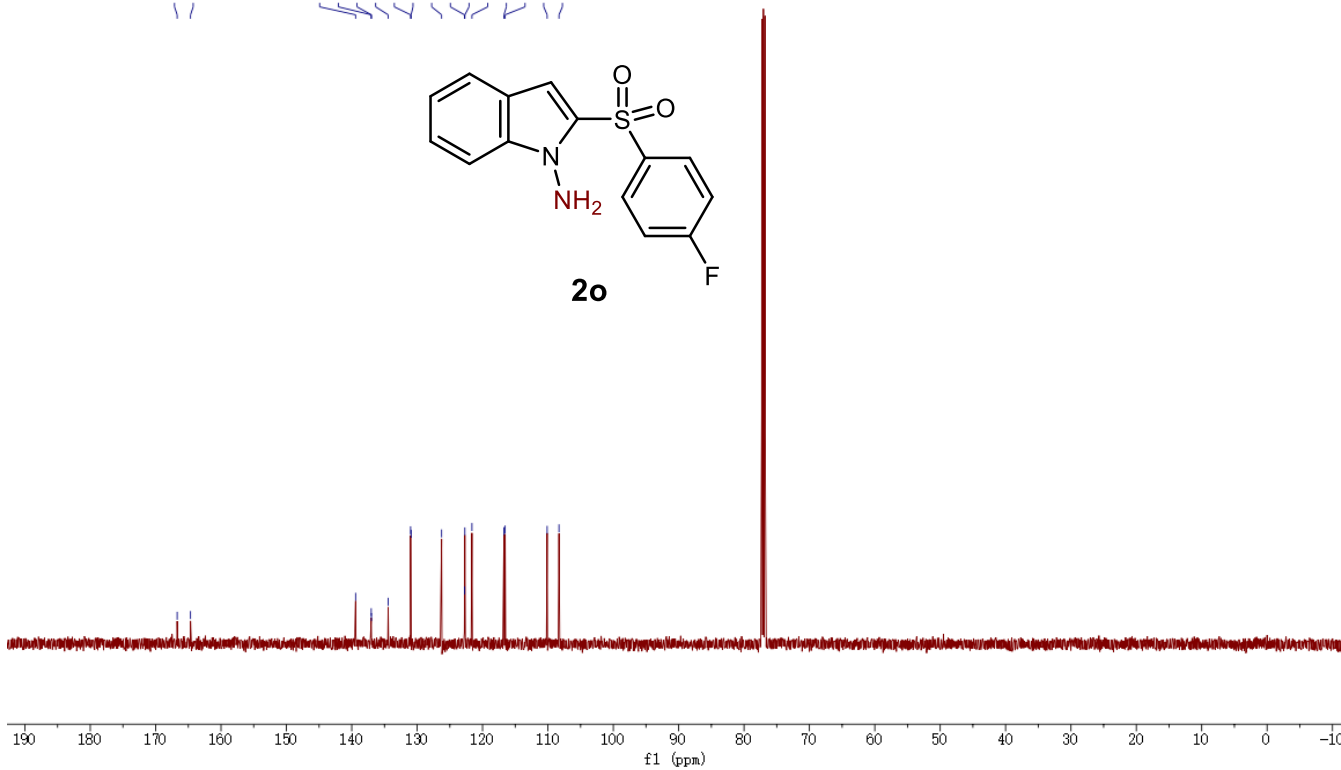

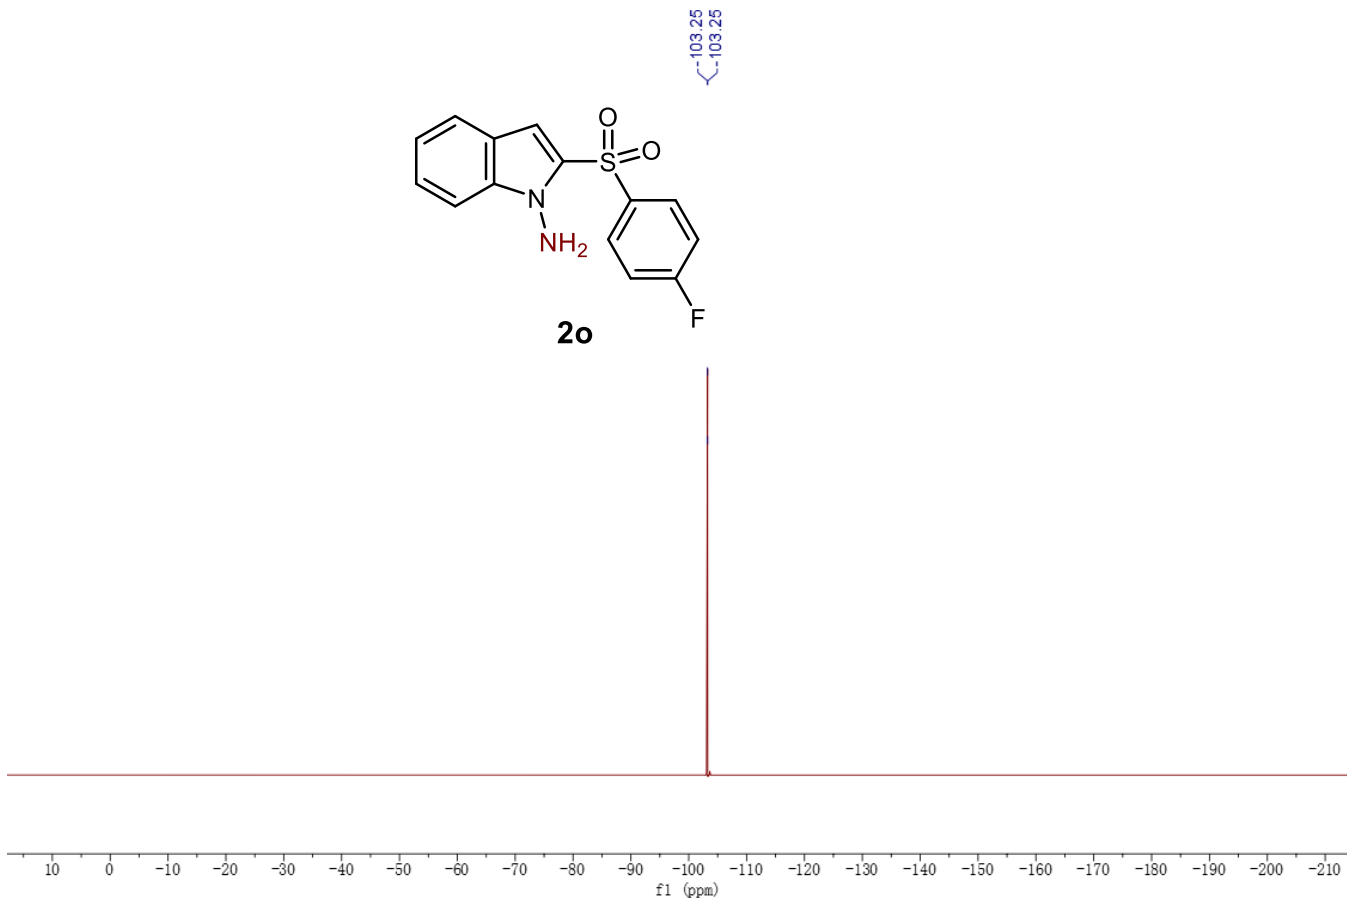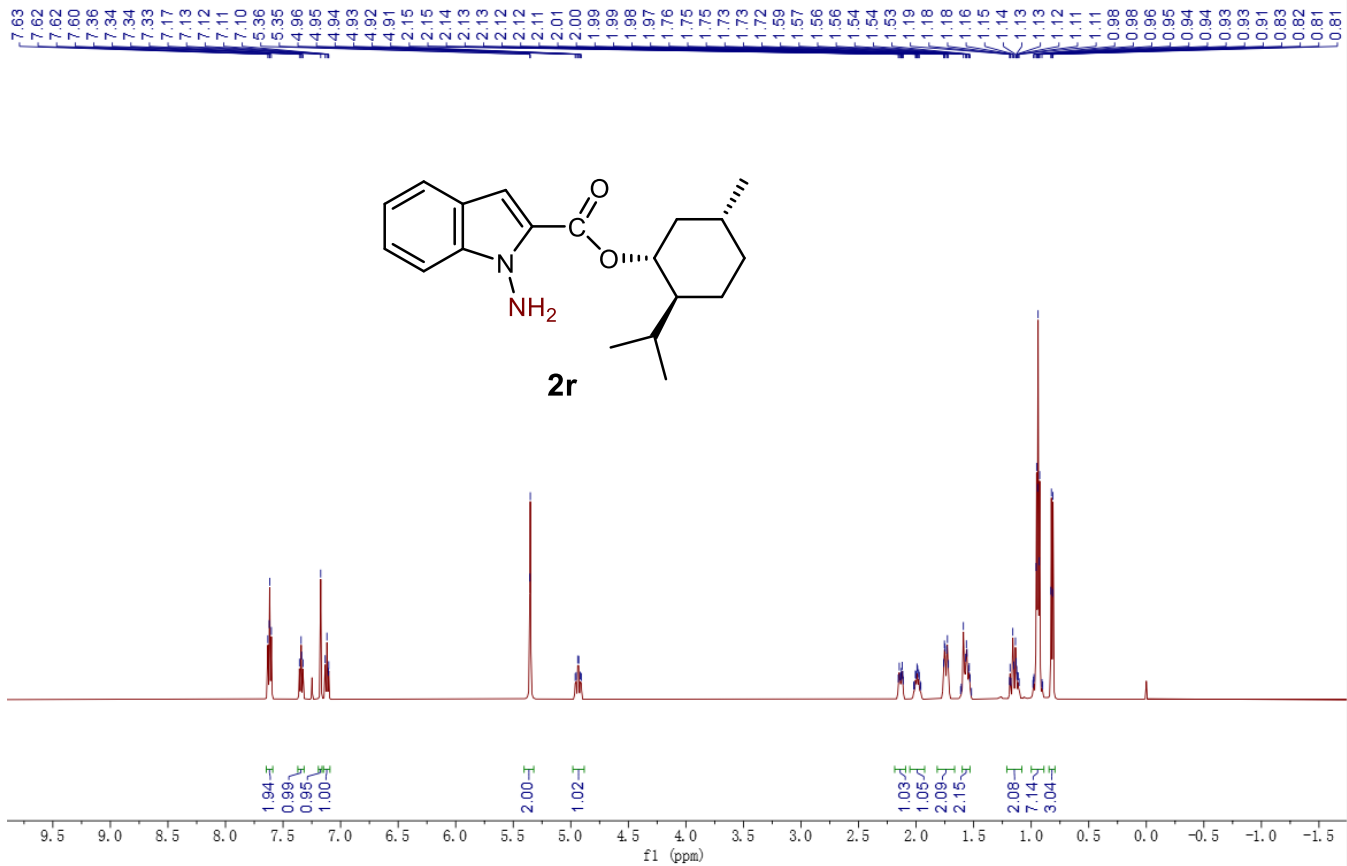

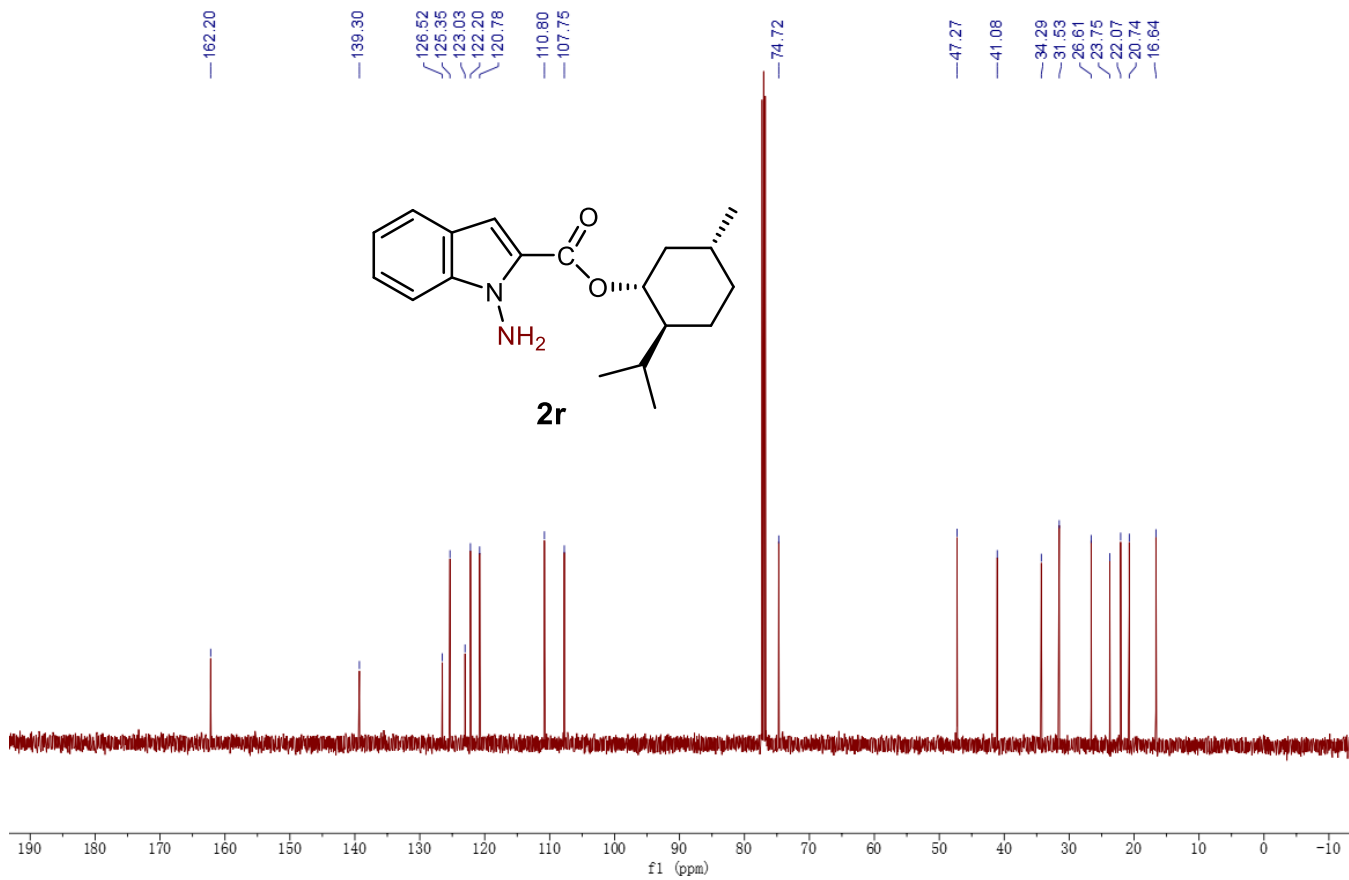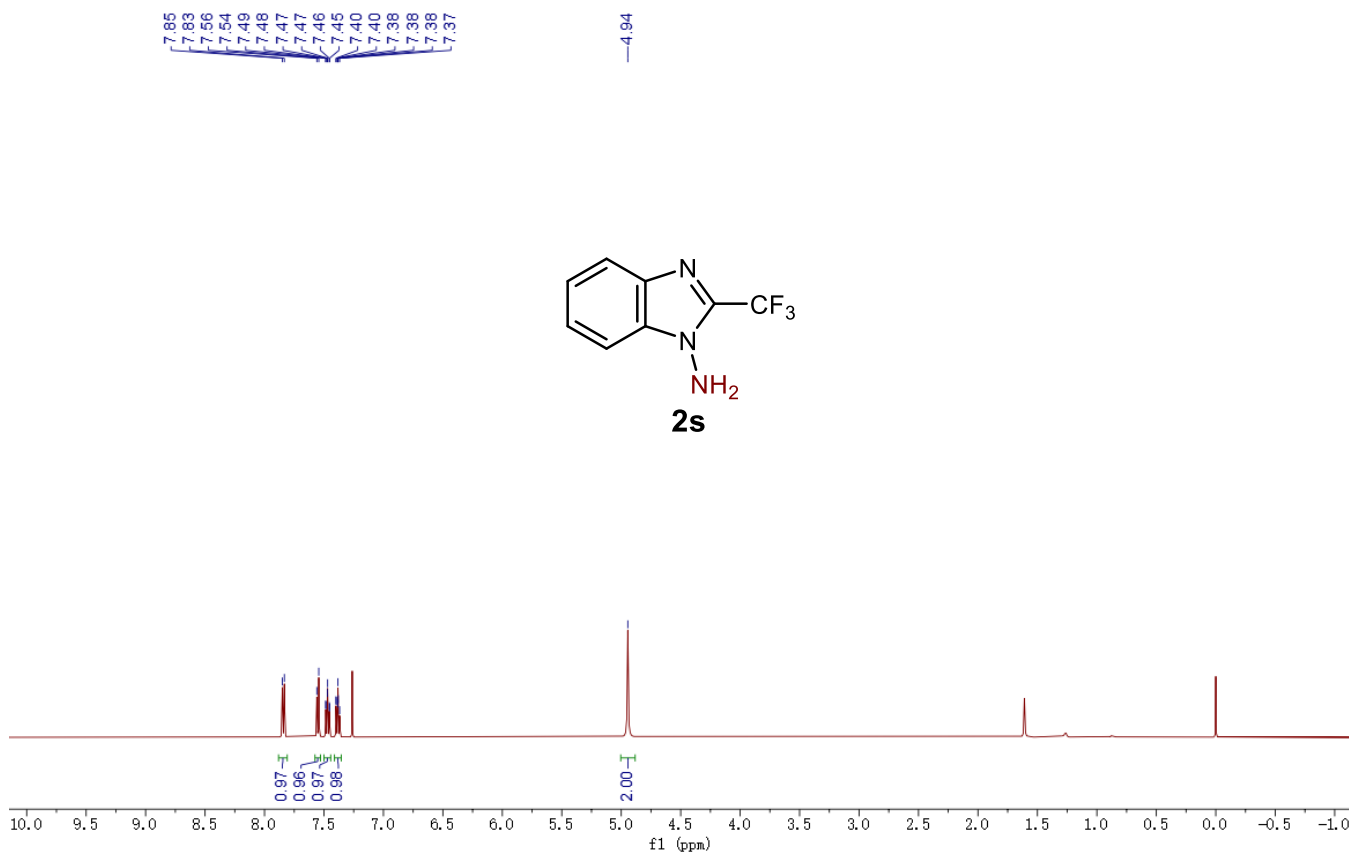

140.77  
138.82  
136.01  
125.73  
123.96  
121.73  
119.84  
117.68  
109.65

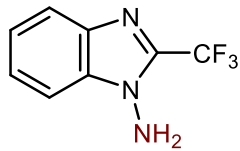

**2s**

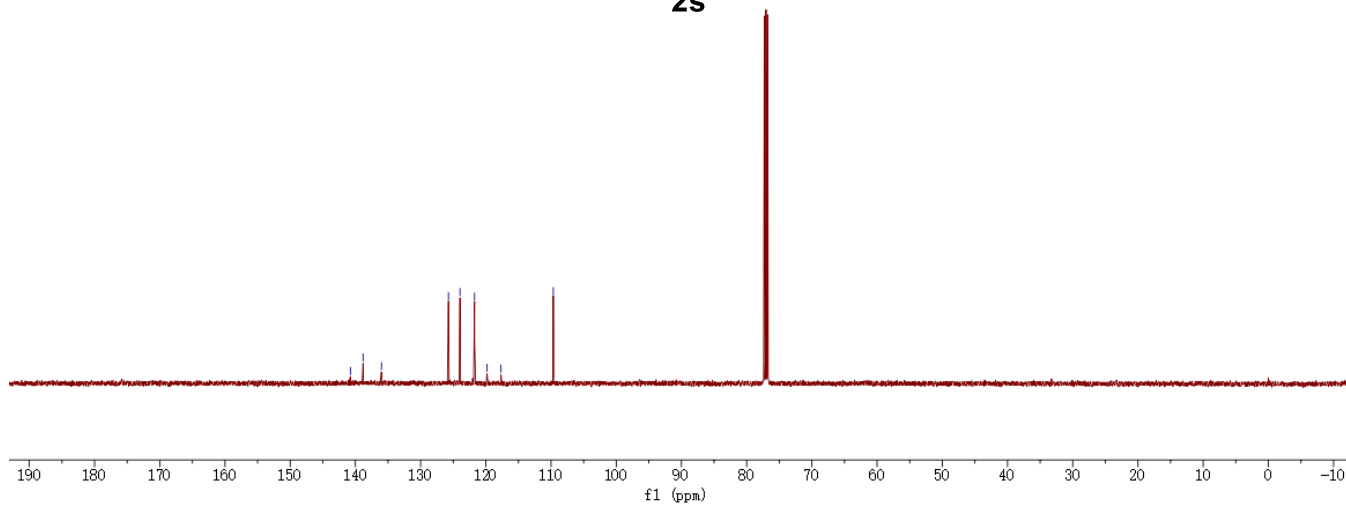

-62.91

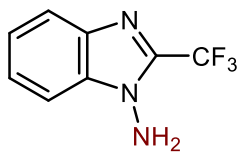

**2s**

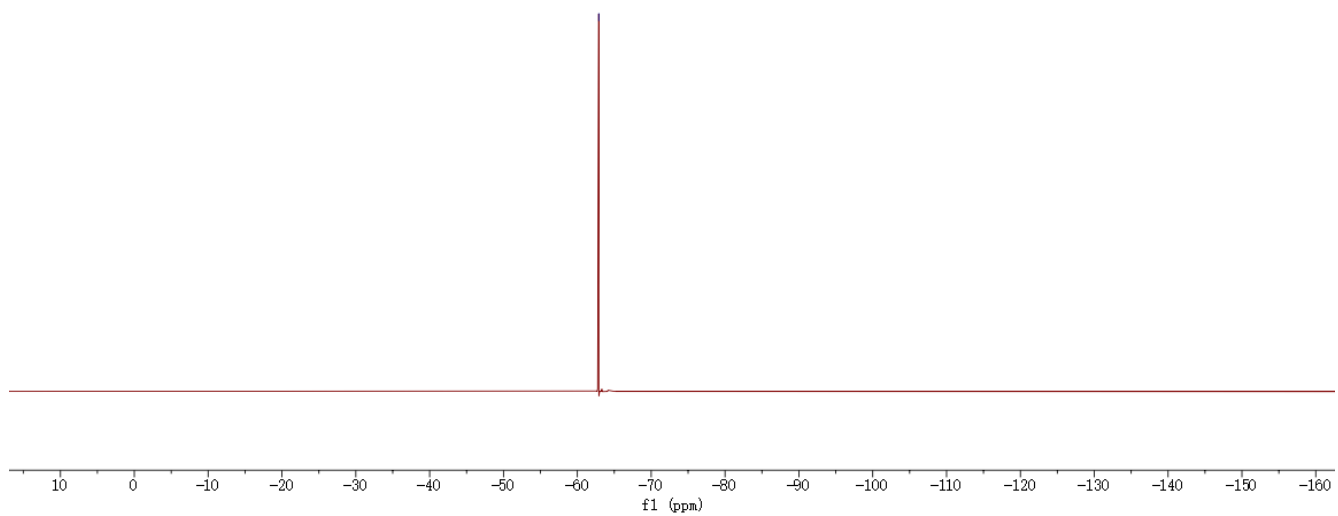

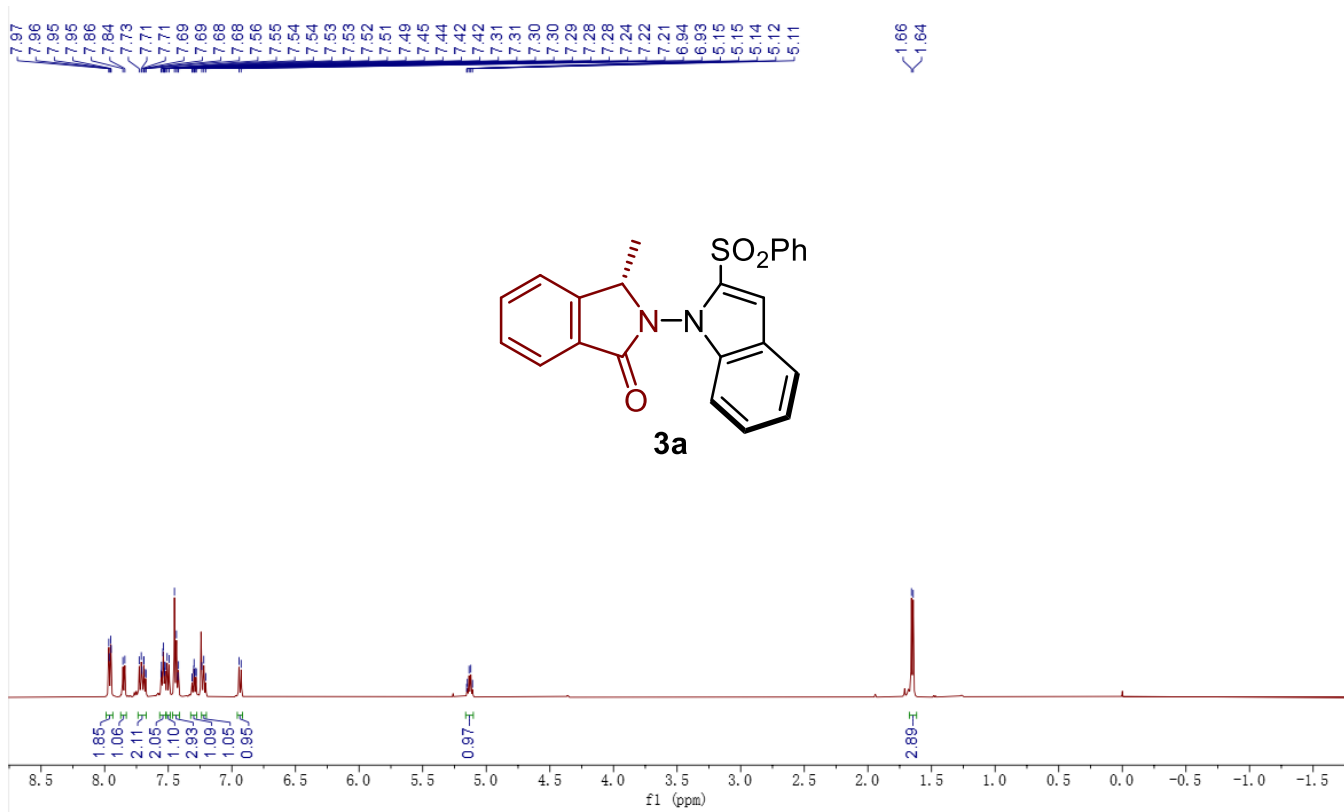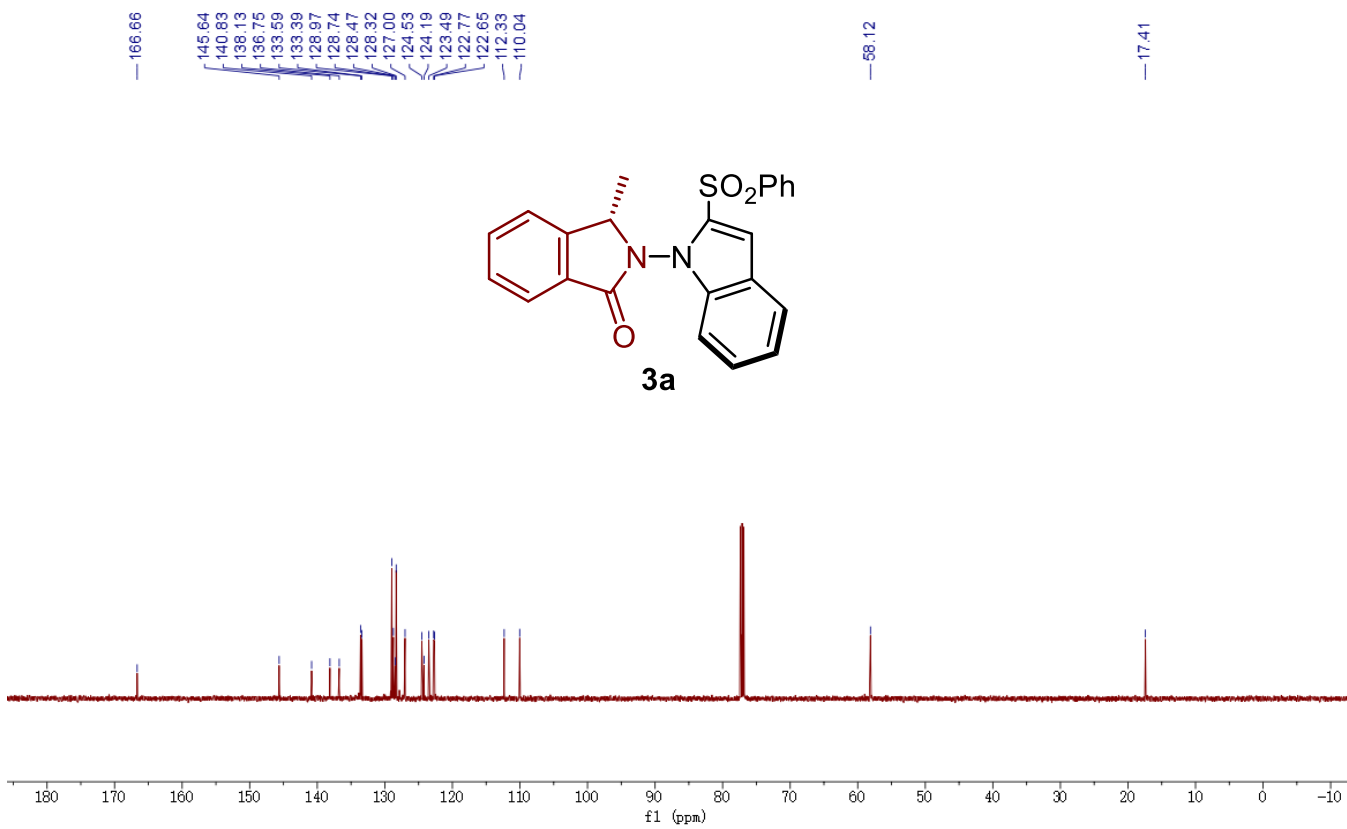



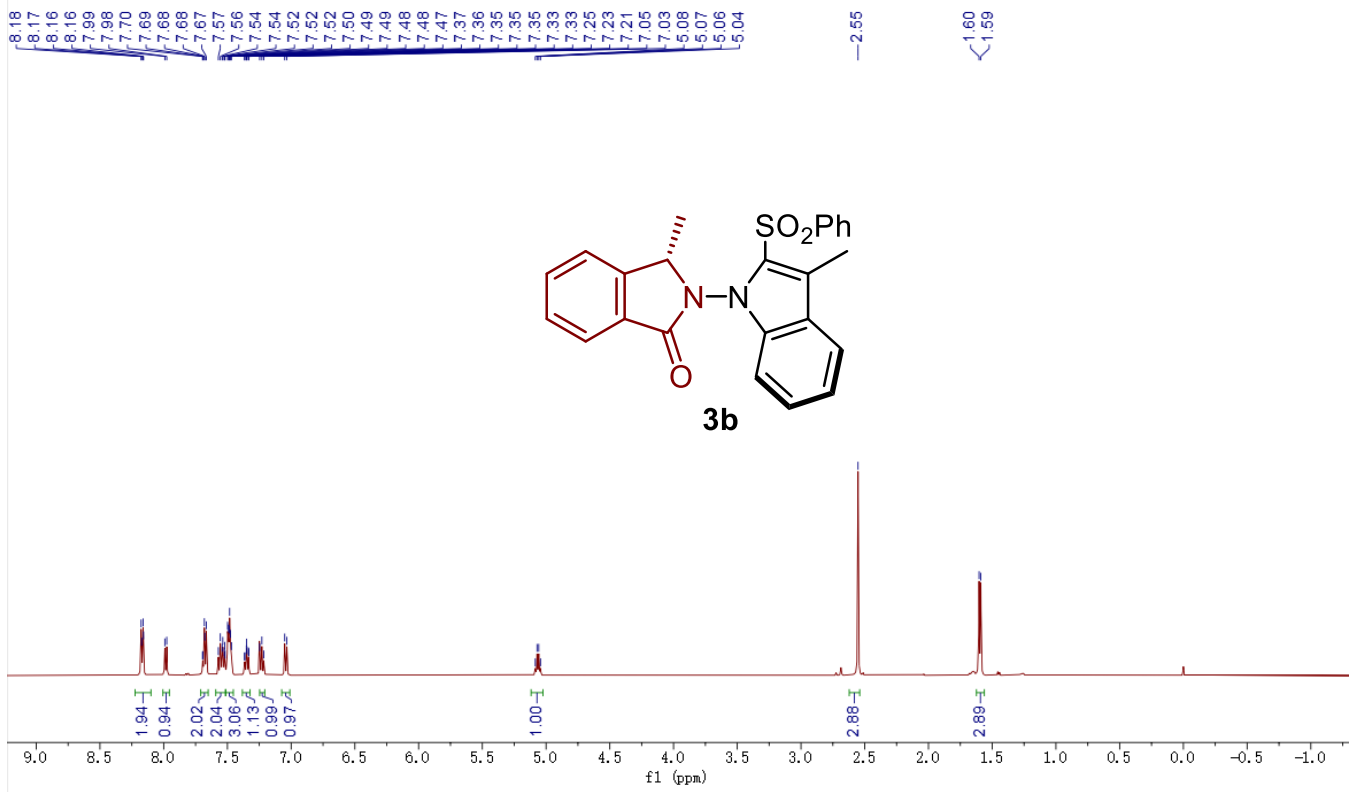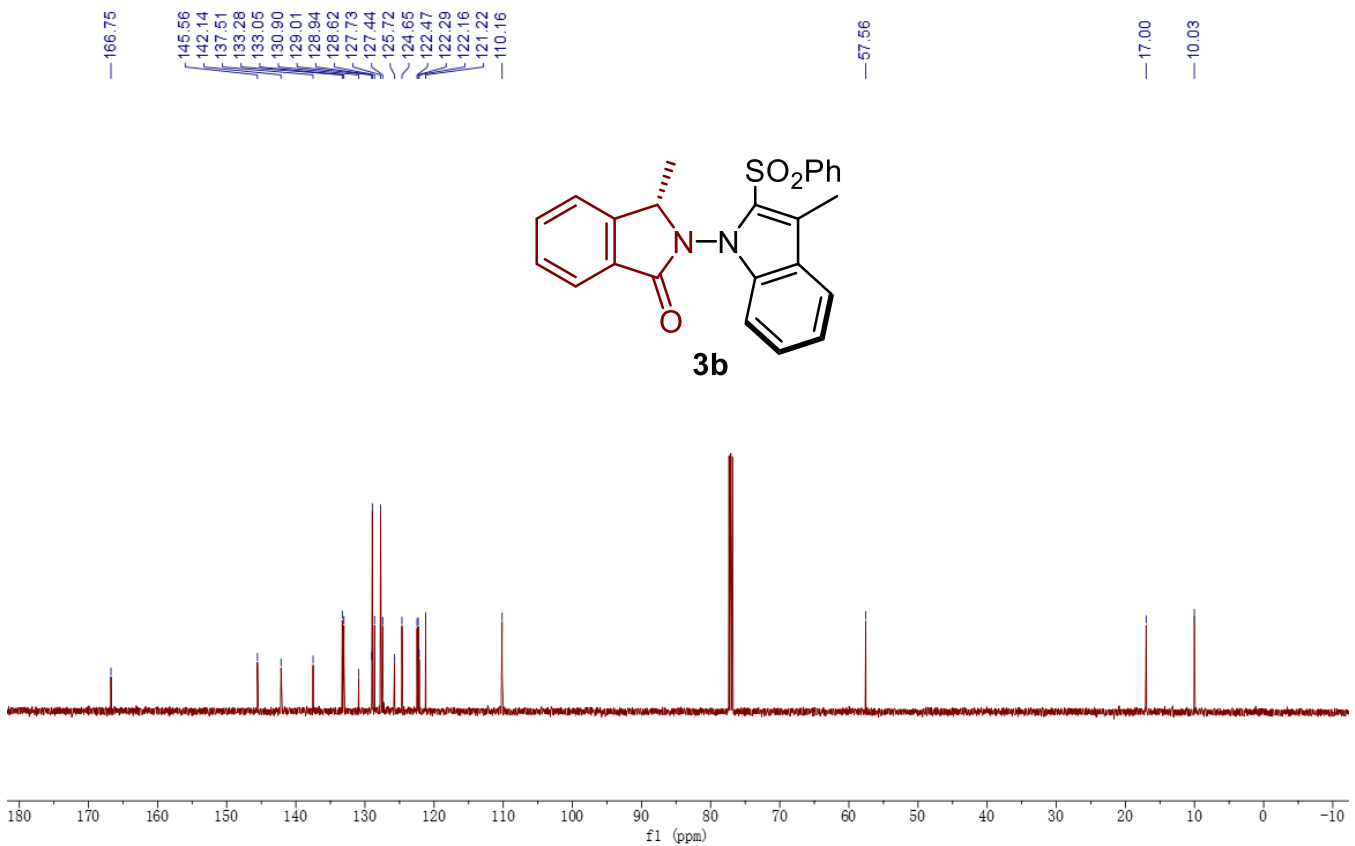

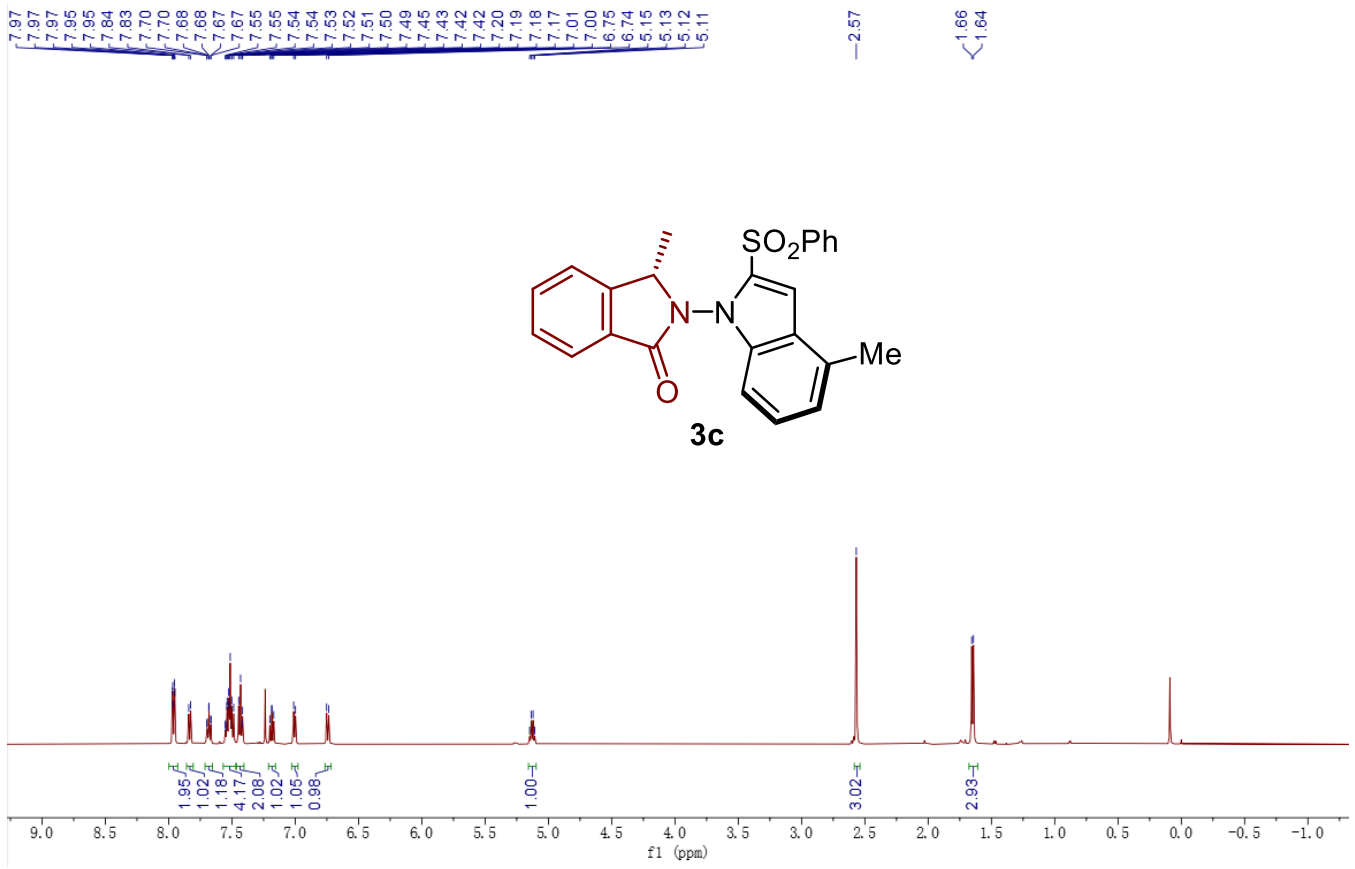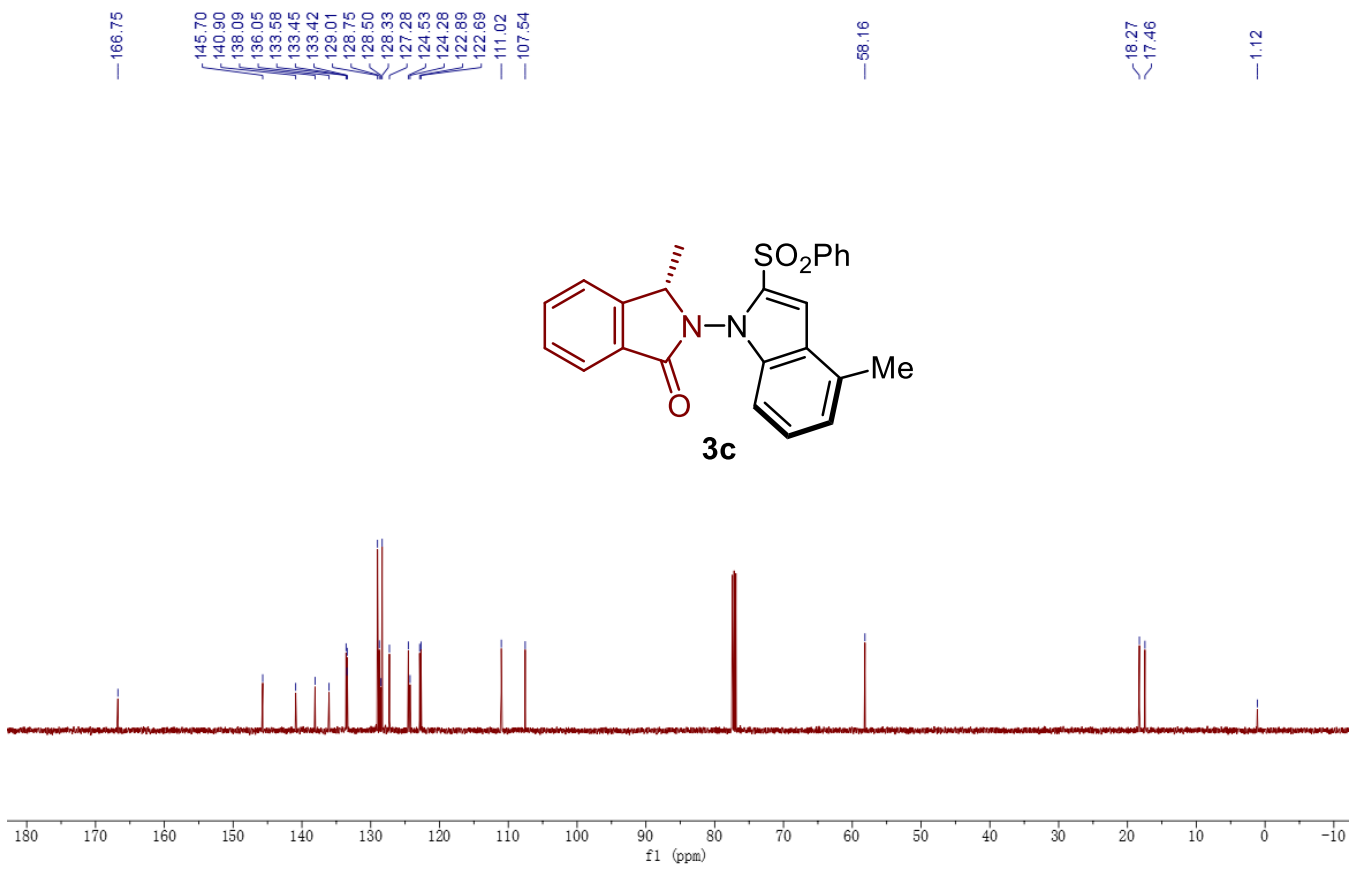

7.96  
7.96  
7.95  
7.94  
7.86  
7.84  
7.69  
7.68  
7.67  
7.66  
7.66  
7.56  
7.54  
7.52  
7.51  
7.51  
7.49  
7.48  
7.44  
7.42  
7.41  
7.41  
7.22  
7.20  
7.18  
6.58  
6.57  
6.55  
6.53  
6.52  
6.50  
5.12  
5.11  
5.10  
5.08  
3.92

1.63  
1.62

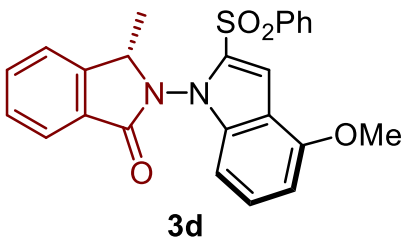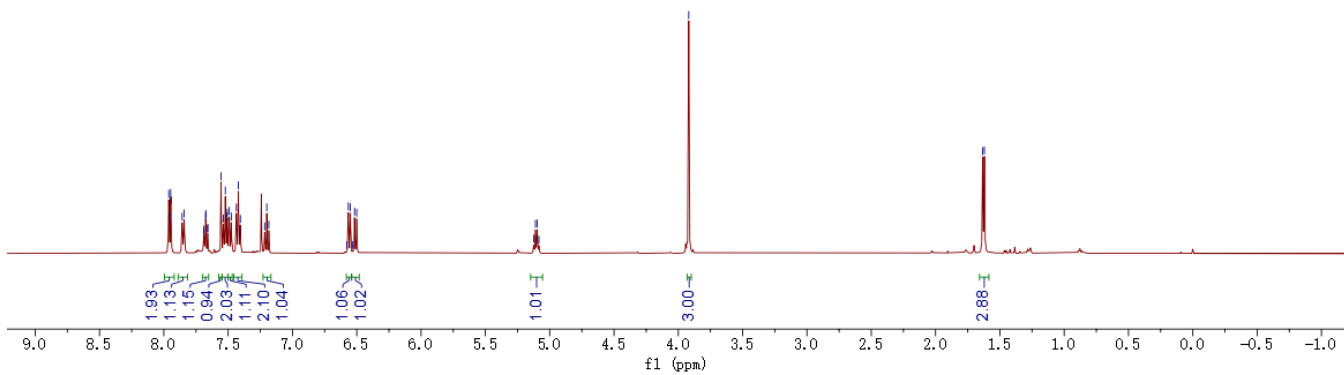

166.63  
155.07  
145.68  
141.13  
139.55  
135.17  
133.50  
133.39  
128.97  
128.73  
128.54  
128.40  
128.27  
124.63  
122.68  
110.17  
102.68  
102.09  
58.07  
55.66  
17.36

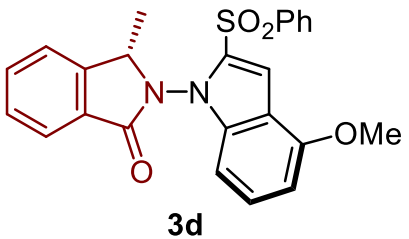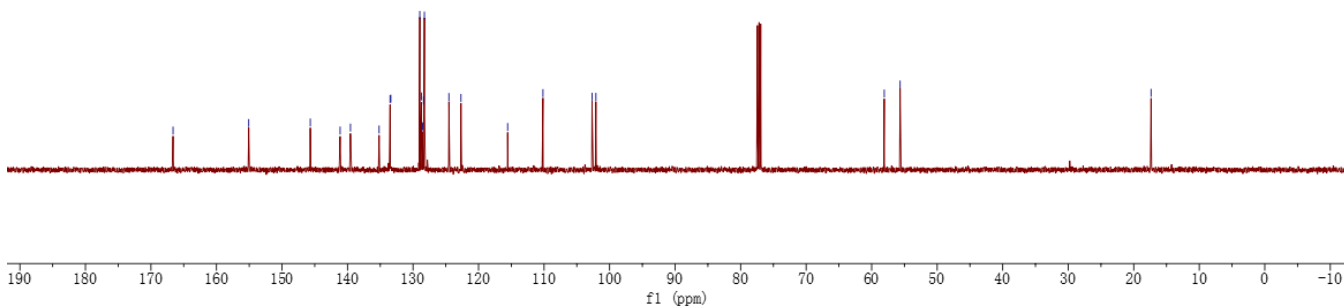

7.97  
7.96  
7.95  
7.86  
7.85  
7.73  
7.58  
7.57  
7.54  
7.48  
7.47  
7.45  
6.89  
6.80  
6.90  
6.88  
6.74  
6.72

5.16  
5.14  
5.13  
5.12

1.70  
1.69

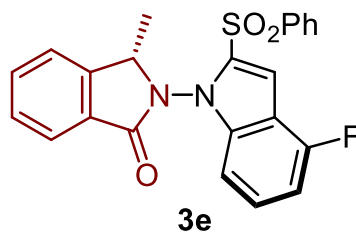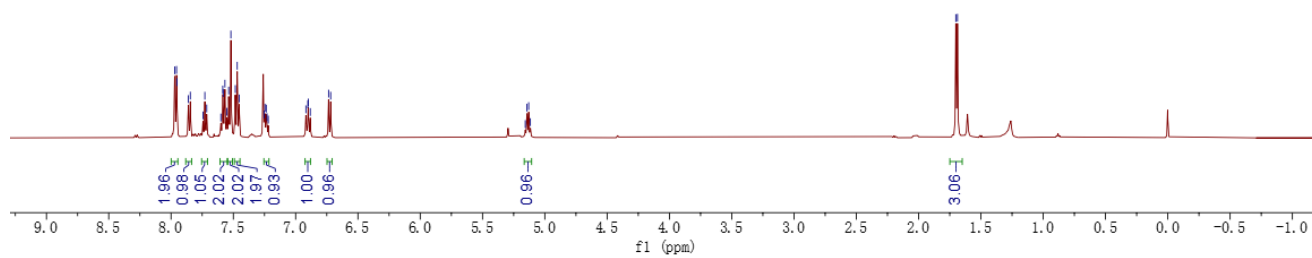

166.62  
158.48  
156.46  
145.60  
140.48  
140.05  
139.98  
137.28  
133.82  
133.56  
129.06  
128.85  
128.45  
128.27  
127.80  
124.62  
122.67  
114.16  
113.98  
107.99  
107.58  
107.44  
106.05  
106.02

88.22

17.45

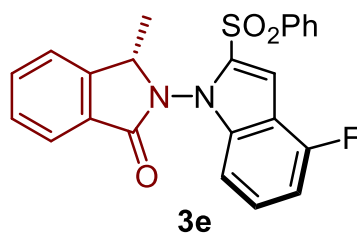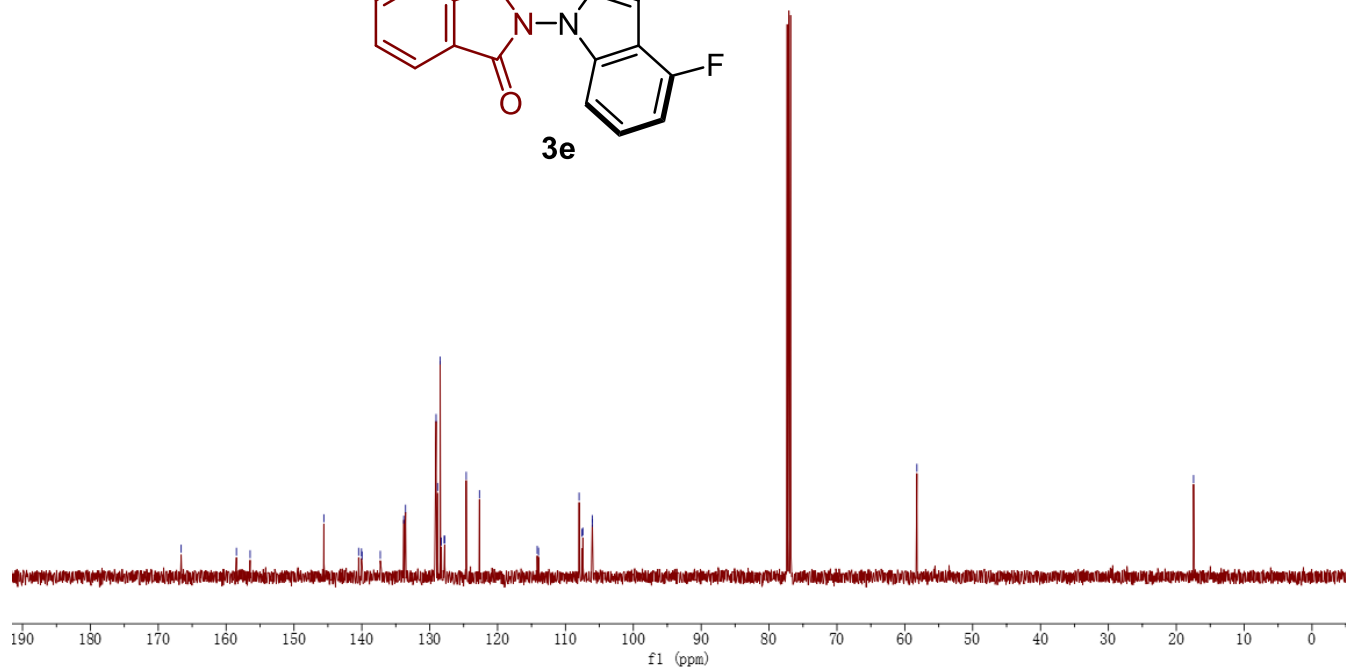

-119.15  
-119.16  
-119.17  
-119.18

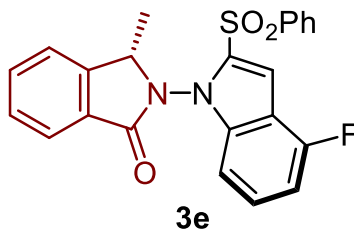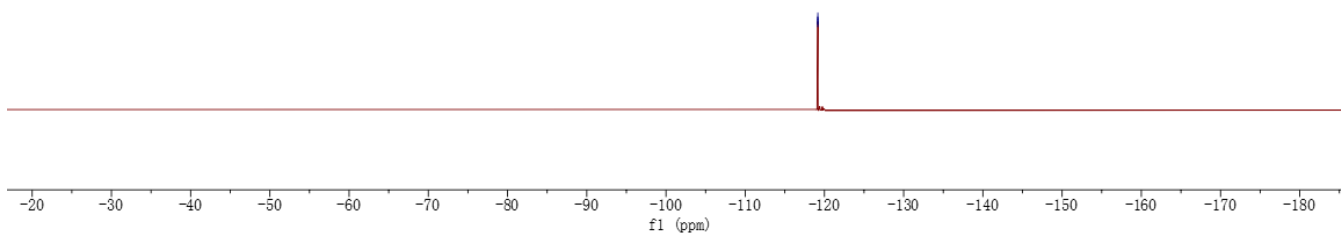

7.96  
7.96  
7.95  
7.94  
7.85  
7.84  
7.69  
7.68  
7.66  
7.66  
7.54  
7.53  
7.51  
7.49  
7.49  
7.48  
7.44  
7.44  
7.42  
7.41  
7.37  
7.13  
7.13  
7.11  
7.11  
6.84  
6.82  
5.12  
5.11  
5.09  
5.08

2.41  
2.40

1.63  
1.62

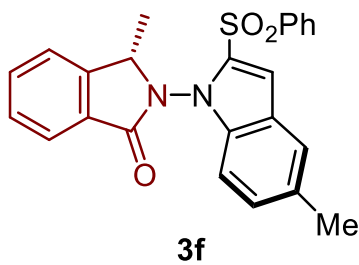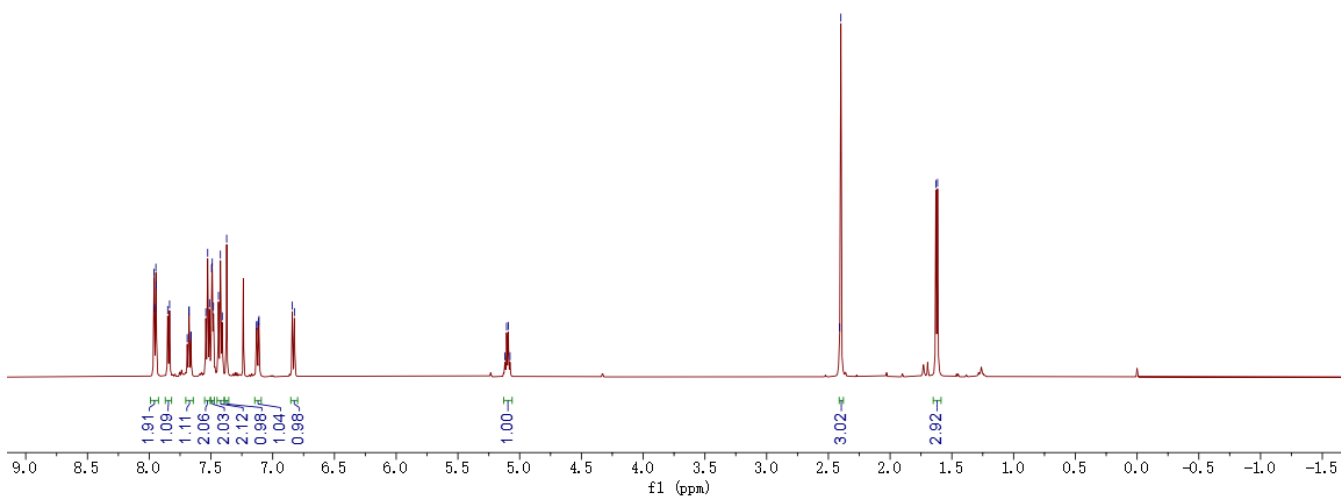

1.91  
1.09  
1.11  
2.06  
2.12  
0.98  
1.04  
0.98

1.00

3.02

2.92

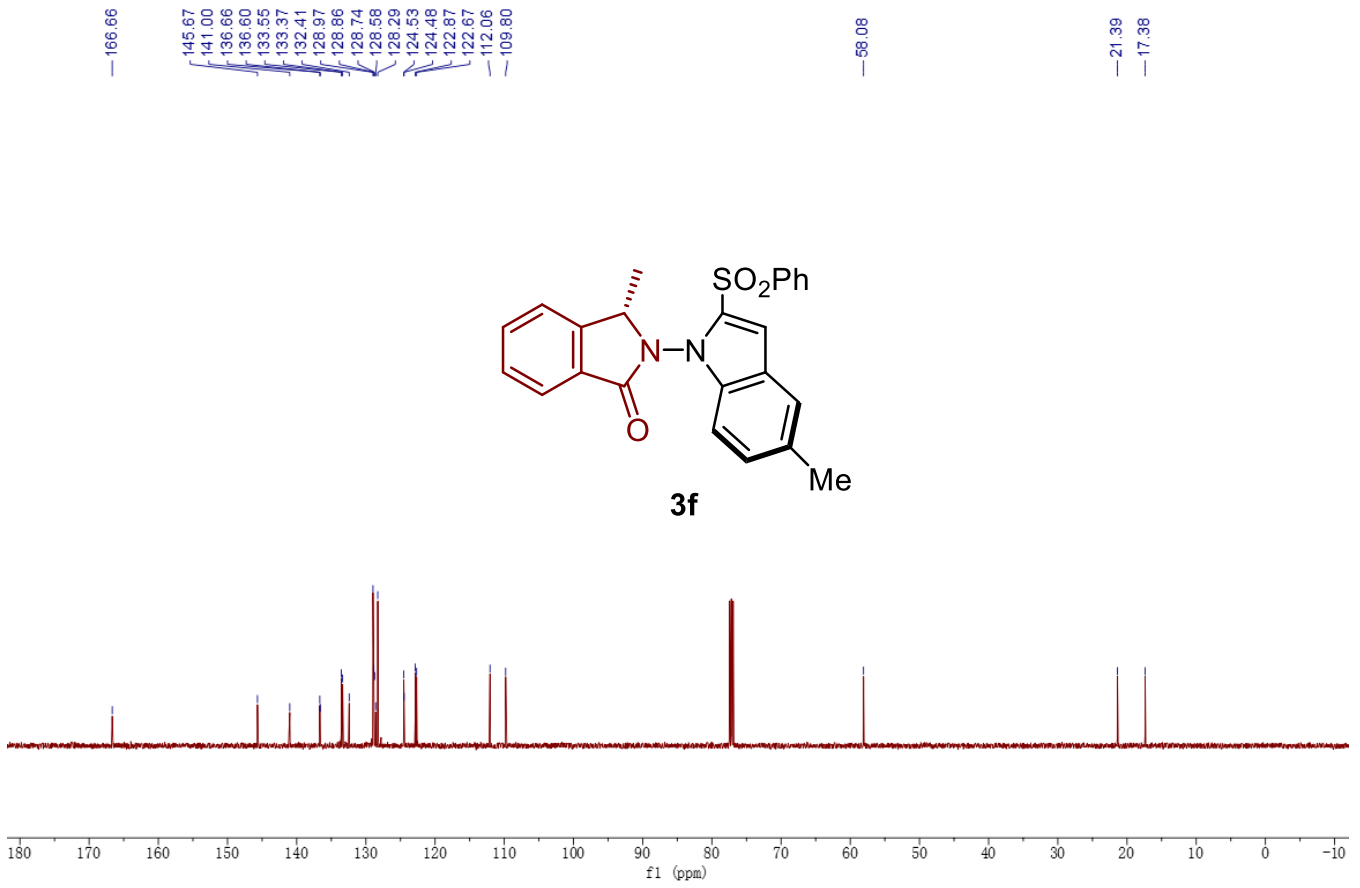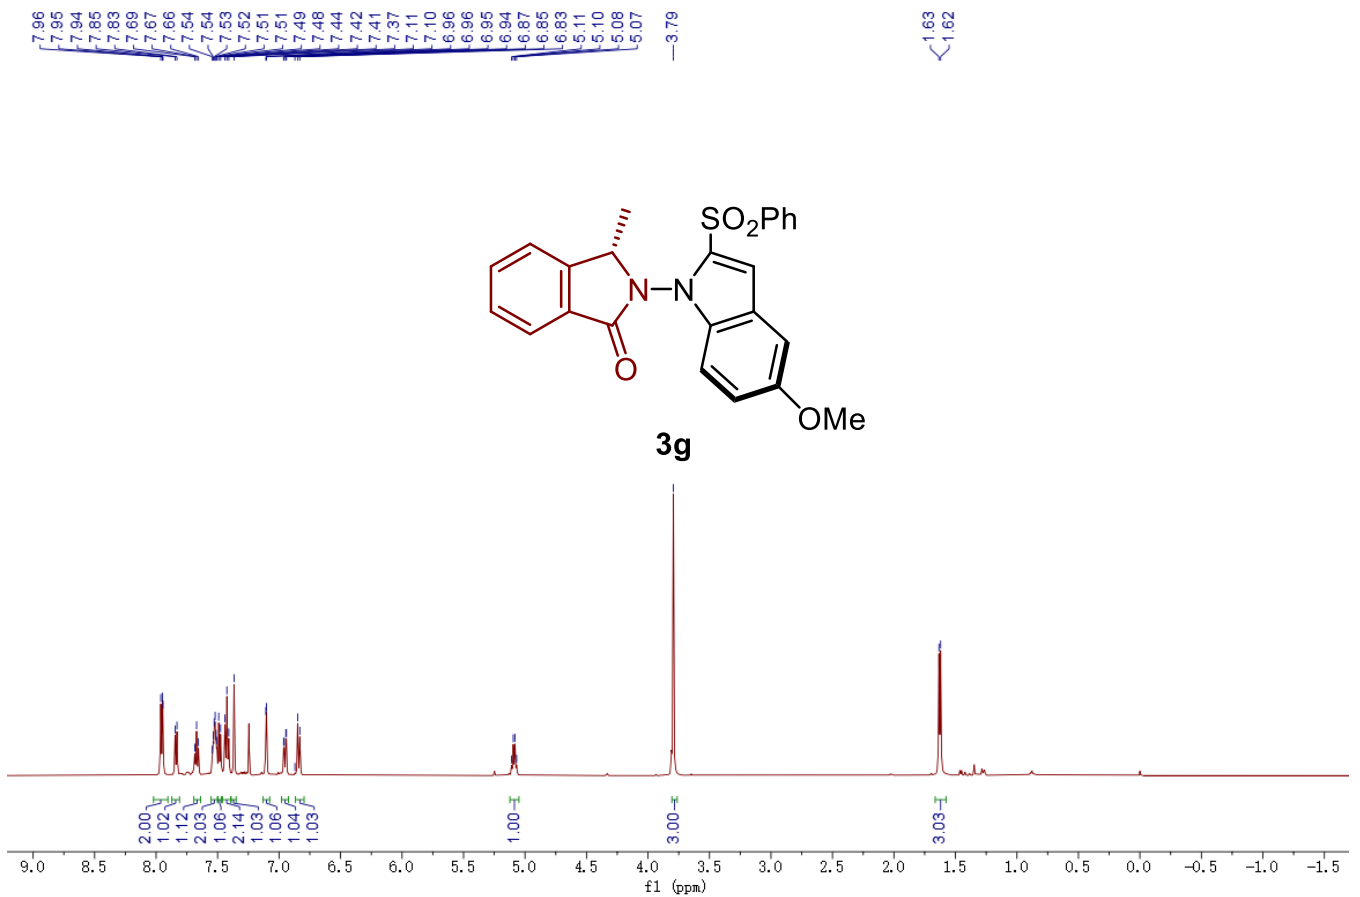

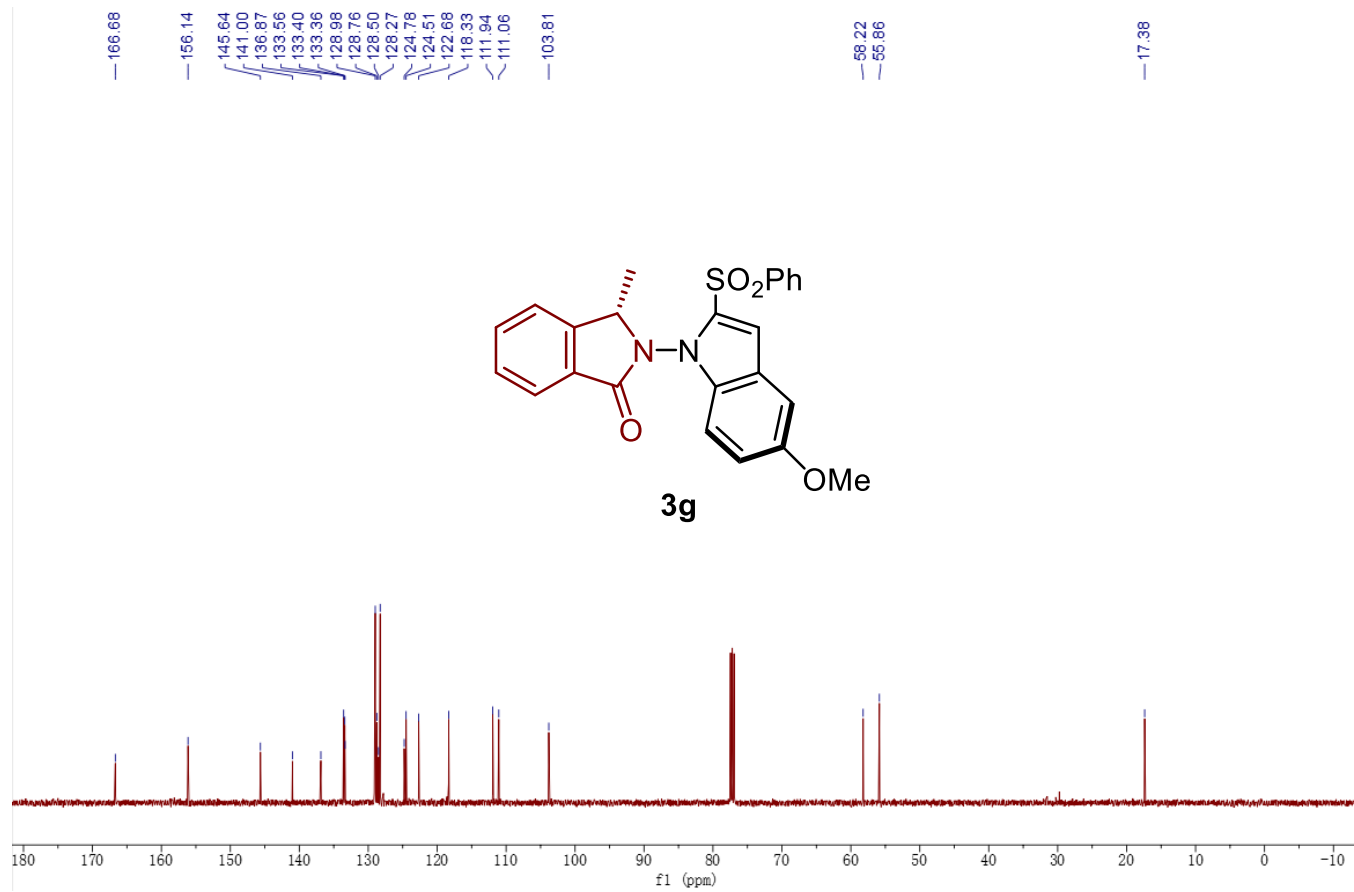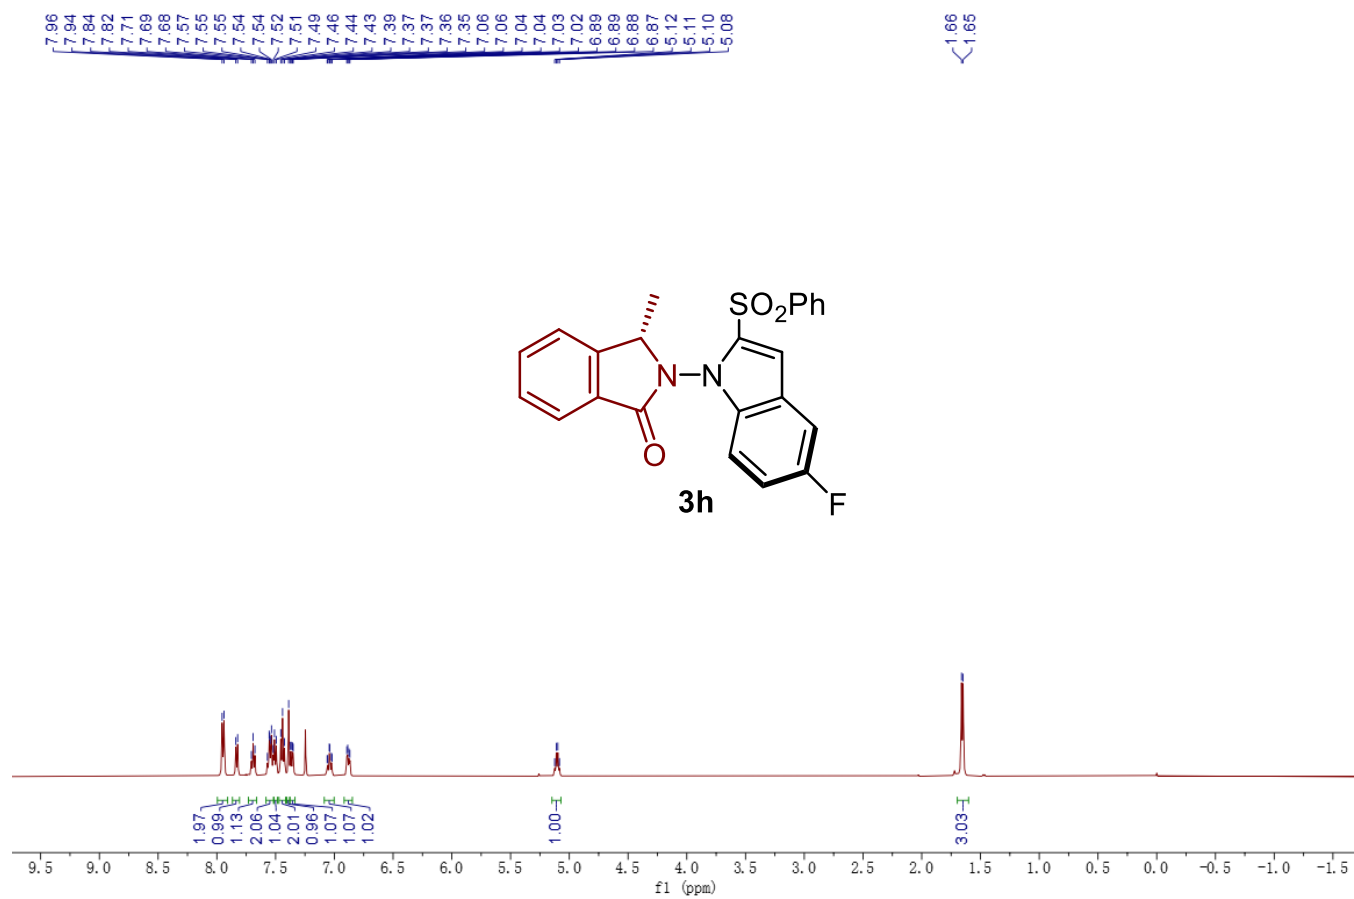

166.62  
160.04  
158.13  
145.56  
140.53  
138.34  
134.56  
133.78  
133.52  
128.03  
128.82  
128.37  
128.27  
124.57  
124.53  
124.49  
122.70  
116.05  
115.83  
111.73  
111.69  
111.26  
111.18  
108.28  
108.09

58.24

17.41

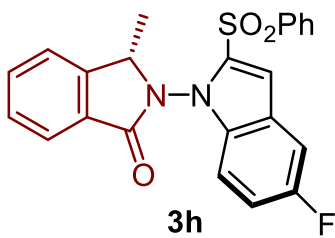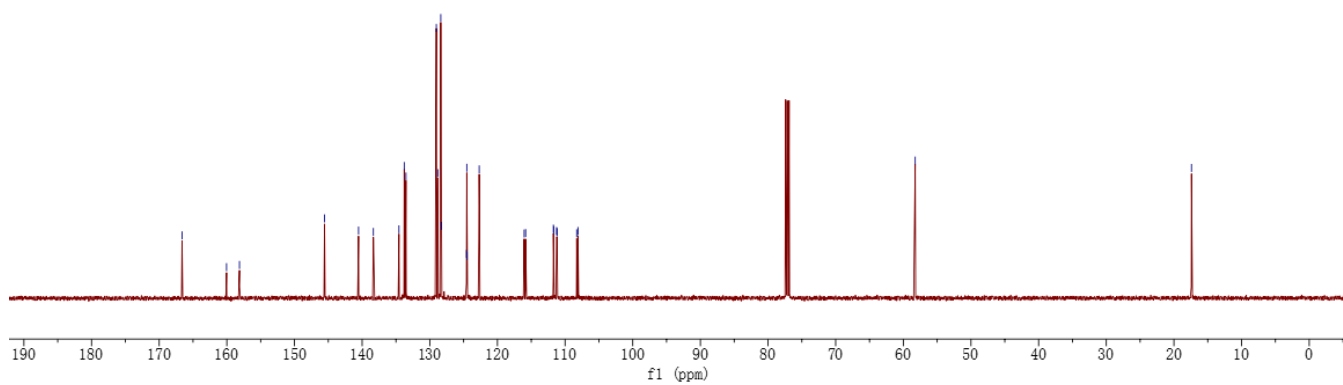

119.86  
119.87  
119.88  
119.89  
119.90  
119.91

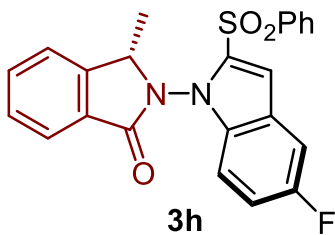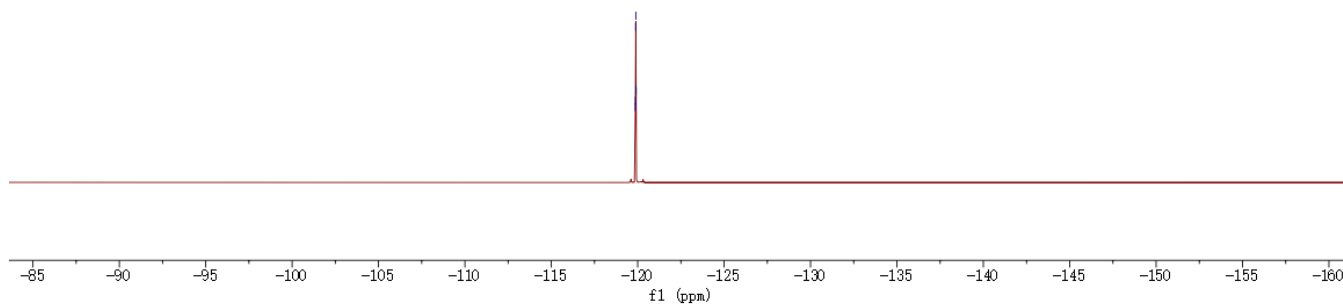



7.94  
7.92  
7.92  
7.84  
7.84  
7.82  
7.81  
7.71  
7.69  
7.68  
7.68  
7.57  
7.55  
7.55  
7.54  
7.53  
7.52  
7.51  
7.49  
7.45  
7.43  
7.42  
7.36  
7.35  
7.35  
7.33  
7.33  
6.82  
6.80  
5.11  
5.09  
5.08  
5.07

1.66  
1.64

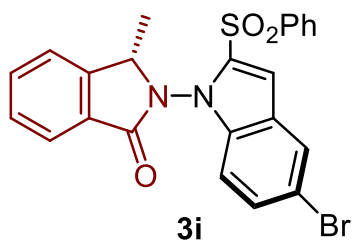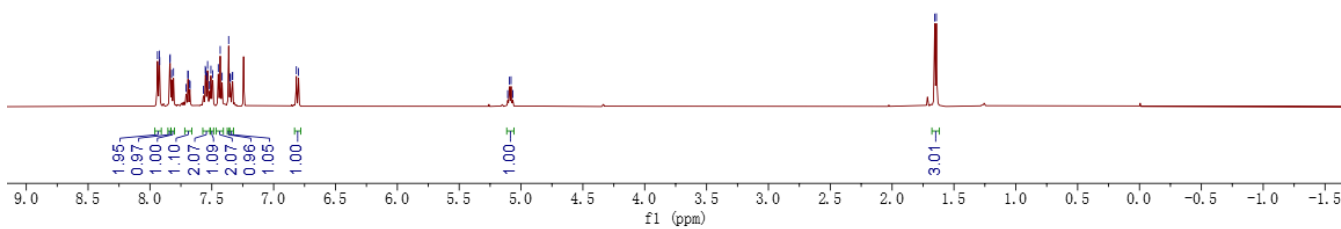

166.61  
145.55  
140.43  
138.06  
136.70  
133.88  
133.61  
128.93  
129.08  
128.89  
128.43  
128.21  
125.89  
125.66  
124.58  
122.75  
115.88  
111.59  
111.19

58.32

17.45

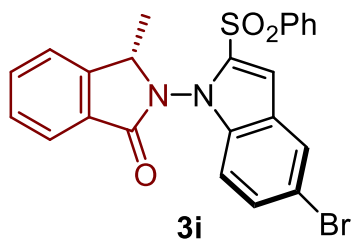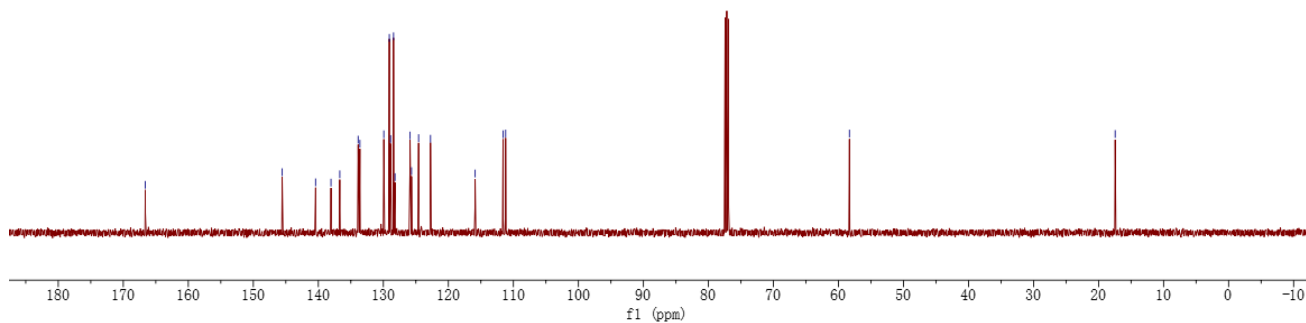

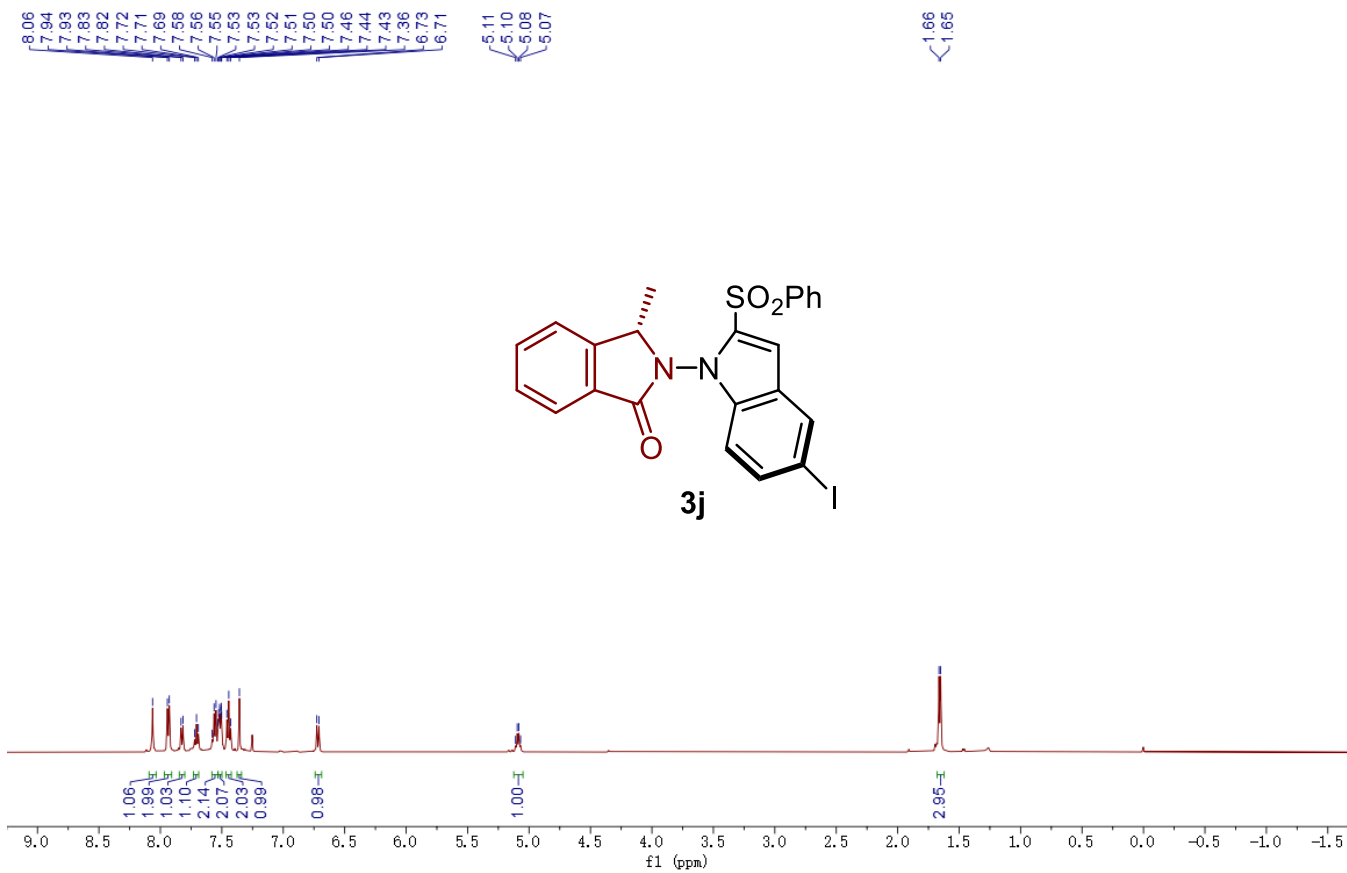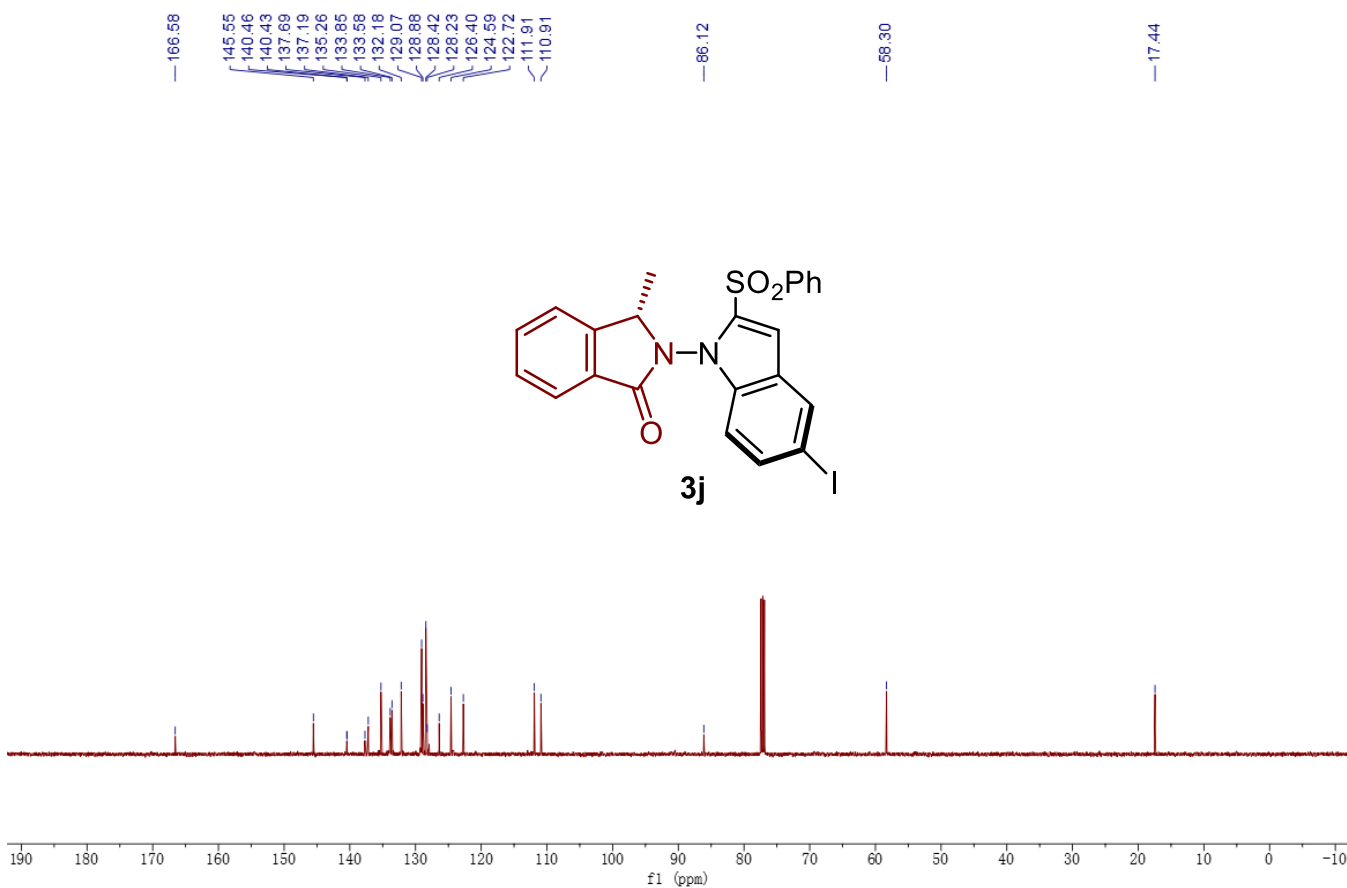

8.03  
8.02  
7.94  
7.94  
7.90  
7.89  
7.74  
7.73  
7.71  
7.60  
7.58  
7.58  
7.56  
7.55  
7.54  
7.54  
7.49  
7.48  
7.46  
7.45  
7.38  
7.36  
7.35  
7.05  
7.03  
5.22  
5.20  
5.19  
5.18

1.72  
1.71

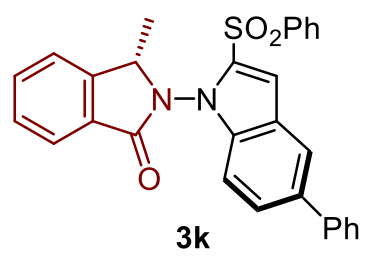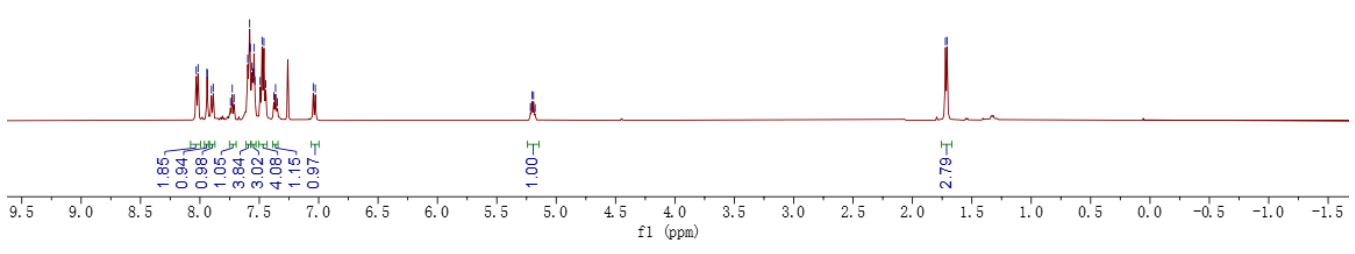

166.75  
145.69  
141.13  
140.81  
137.61  
137.39  
136.57  
133.69  
133.50  
129.04  
128.93  
128.81  
128.45  
128.37  
127.45  
127.24  
126.98  
124.72  
124.55  
122.75  
121.78  
112.54  
110.39

56.31

17.48

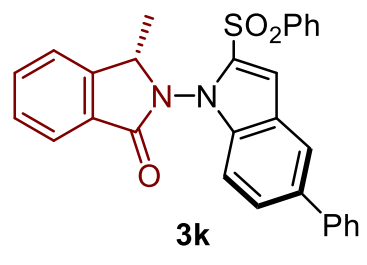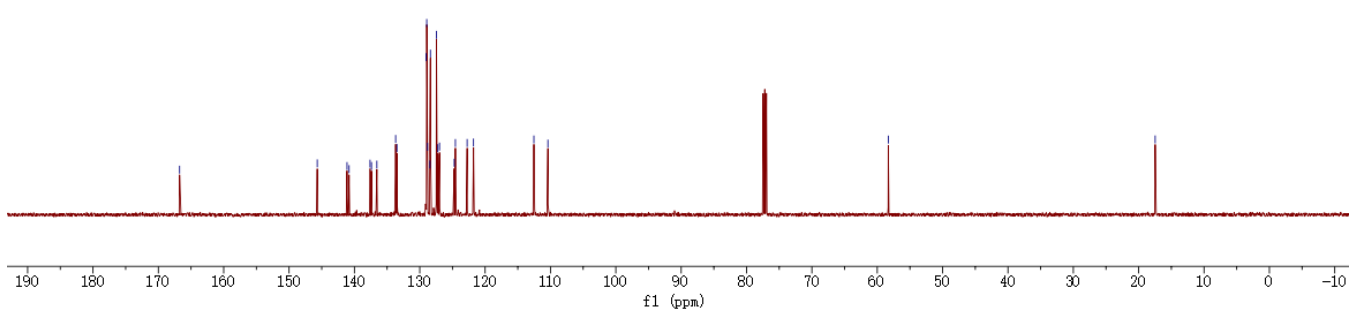

7.97  
7.96  
7.96  
7.96  
7.95  
7.94  
7.93  
7.93  
7.86  
7.87  
7.72  
7.72  
7.71  
7.71  
7.69  
7.69  
7.60  
7.60  
7.59  
7.57  
7.56  
7.55  
7.54  
7.53  
7.52  
7.52  
7.51  
7.45  
7.45  
7.44  
7.43  
7.42  
7.41  
7.40  
7.07  
7.07  
7.05  
6.72  
5.15  
5.13  
5.12  
5.11

—2.36

1.67  
1.65  
1.64

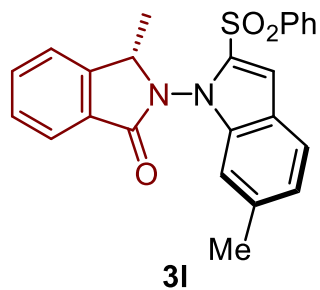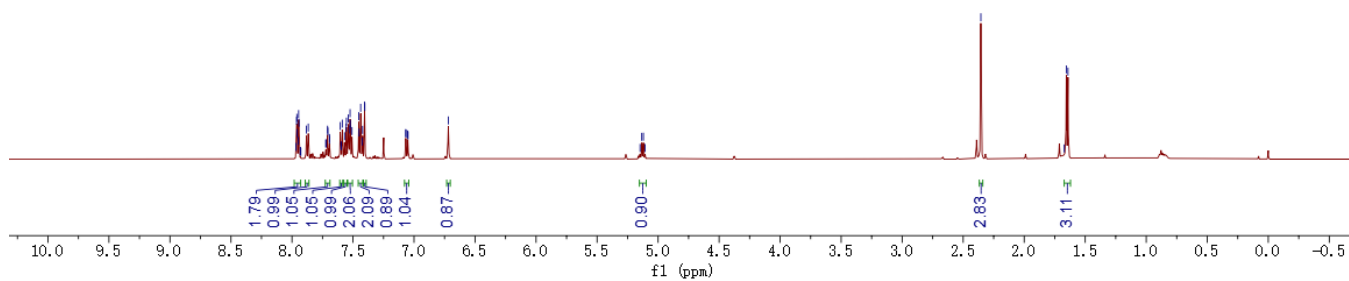

—166.60

145.64  
141.07  
138.64  
137.77  
135.87  
133.45  
133.31  
128.92  
128.70  
128.60  
128.21  
124.80  
124.57  
123.11  
122.84  
122.12  
112.56  
109.65

—57.97

—22.02

—17.33

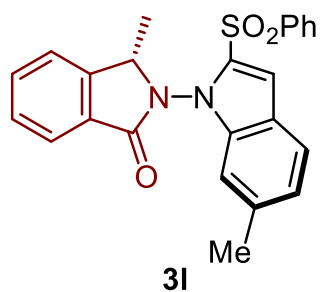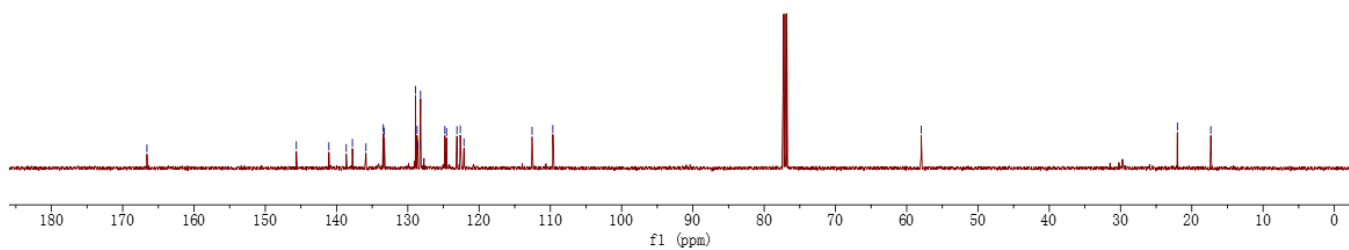

7.97  
7.97  
7.97  
7.96  
7.95  
7.91  
7.90  
7.74  
7.73  
7.72  
7.72  
7.71  
7.70  
7.61  
7.59  
7.57  
7.56  
7.56  
7.55  
7.54  
7.54  
7.53  
7.51  
7.47  
7.47  
7.46  
7.44  
7.44  
7.40  
6.90  
6.90  
6.88  
6.88  
6.34  
6.33  
6.33  
5.14  
5.11  
5.10  
3.72

1.65  
1.63

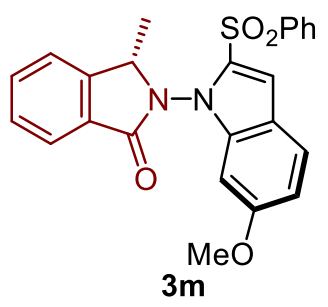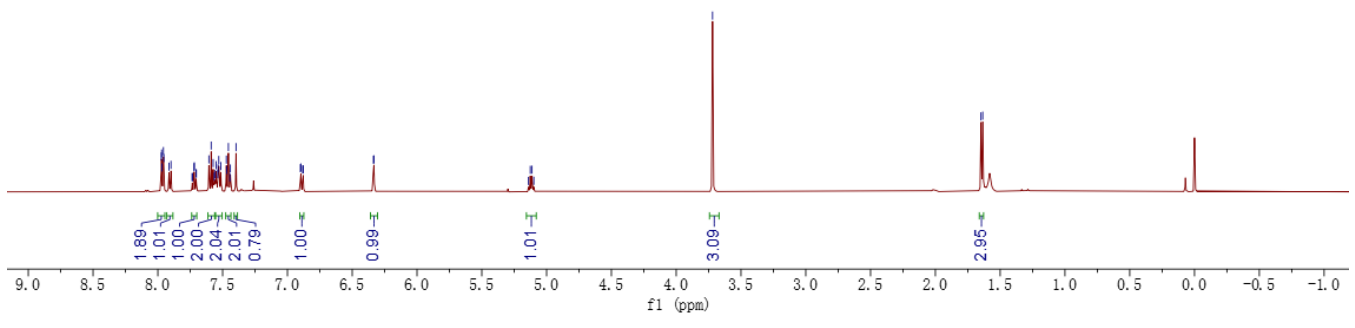

166.33  
160.19  
145.60  
139.70  
135.15  
133.33  
133.27  
128.91  
128.71  
128.13  
124.63  
124.39  
122.62  
118.43  
113.50  
113.18  
92.70  
57.54  
55.78  
29.74  
17.21

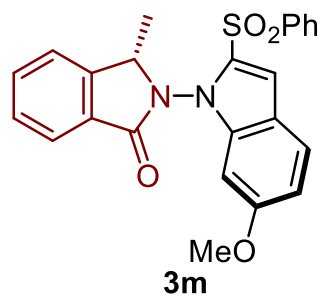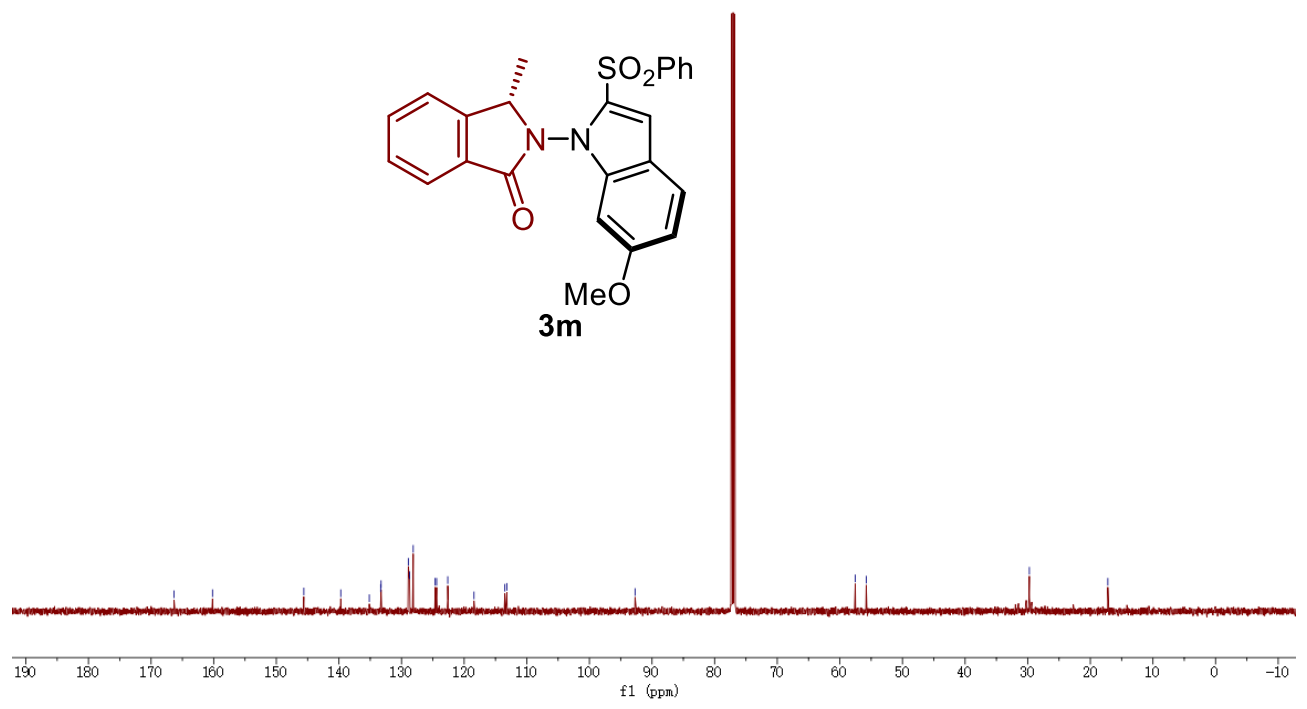

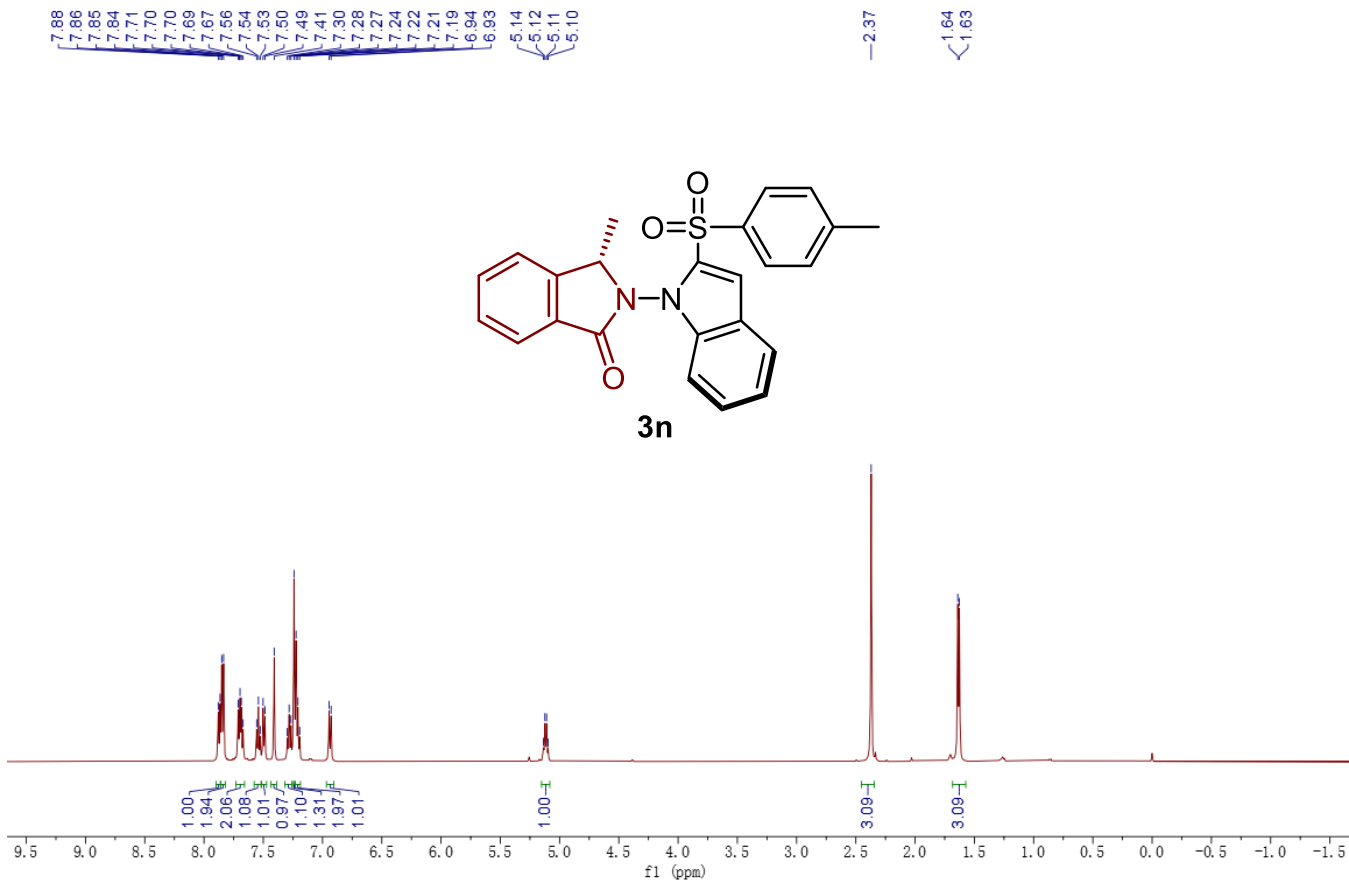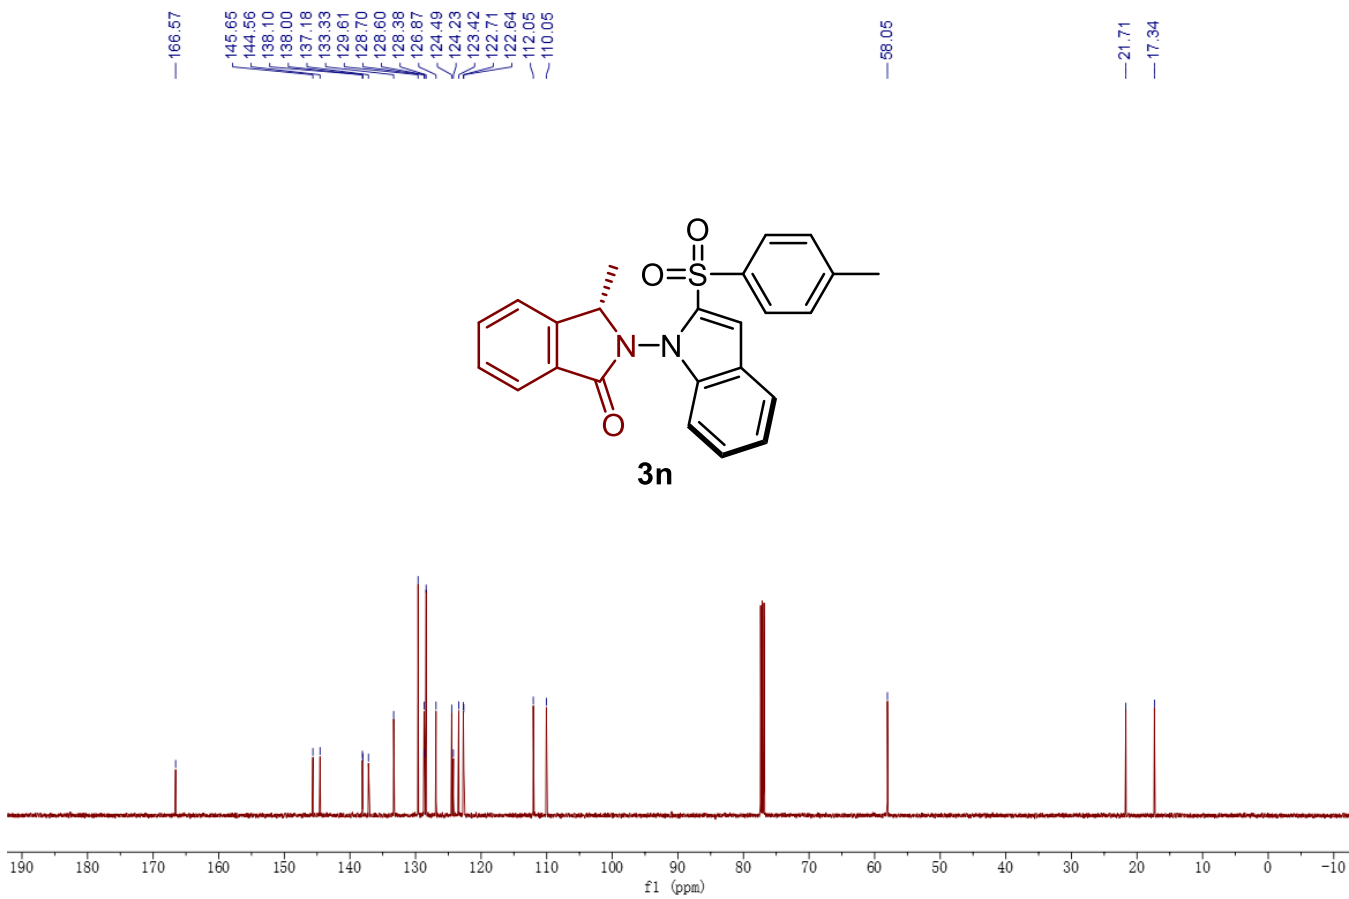

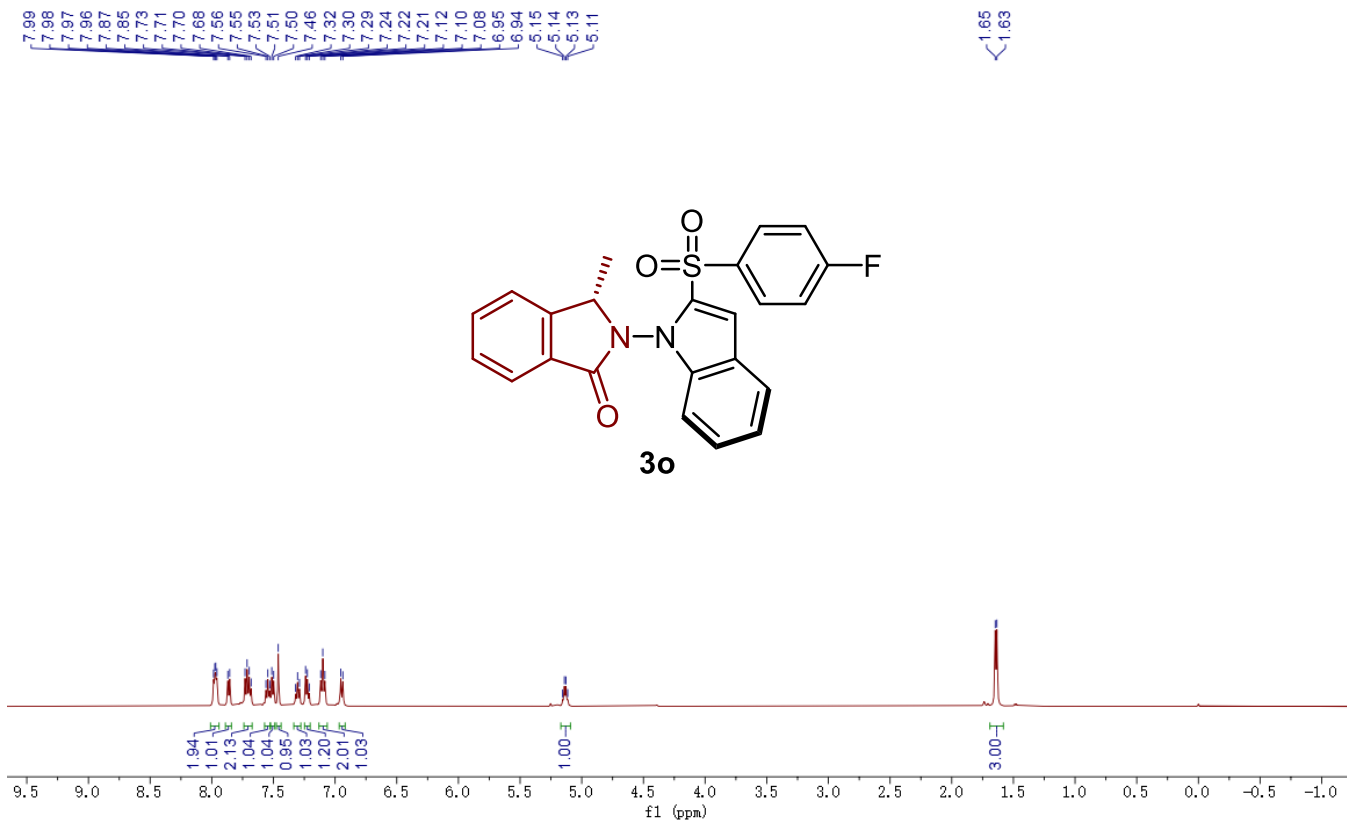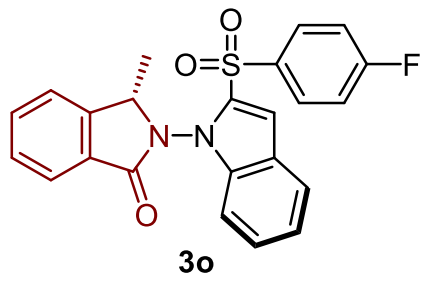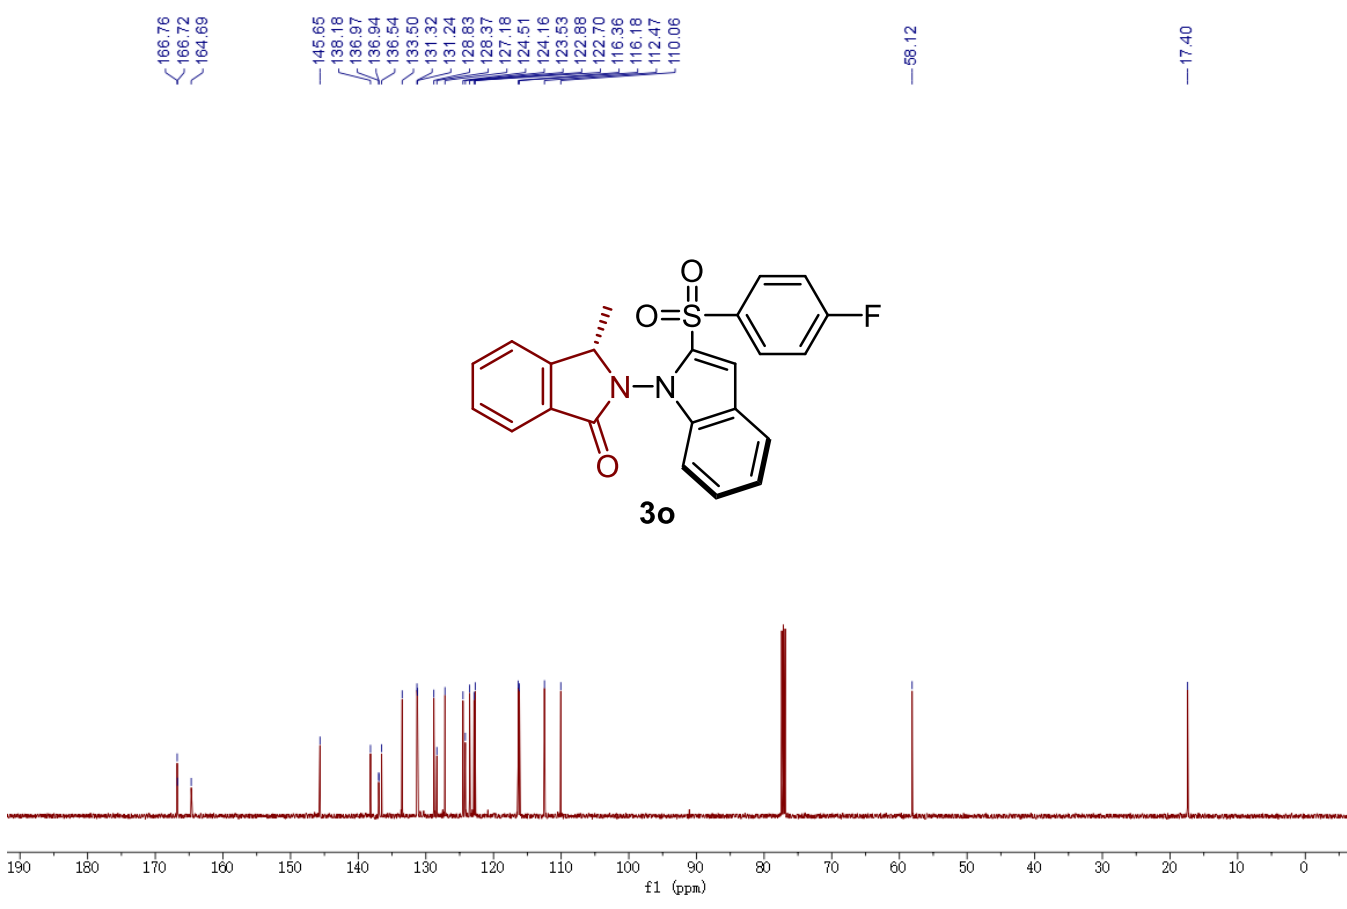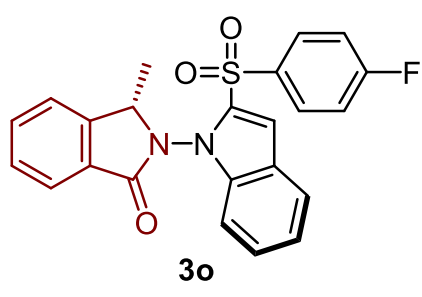

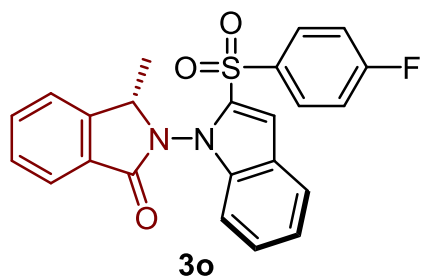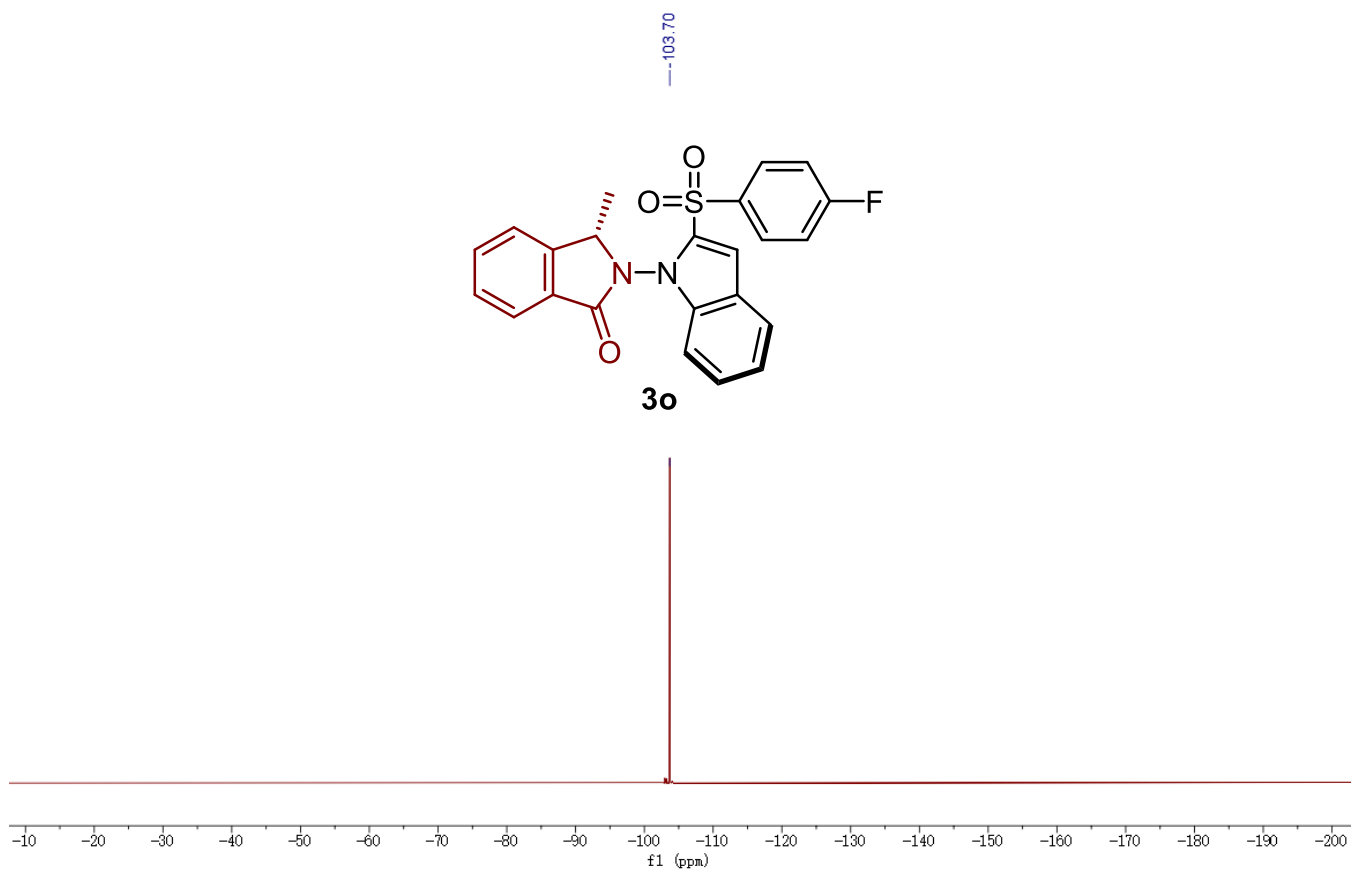

7.96  
7.94  
7.72  
7.72  
7.72  
7.71  
7.70  
7.70  
7.68  
7.67  
7.66  
7.55  
7.54  
7.52  
7.51  
7.49  
7.45  
7.37  
7.37  
7.36  
7.36  
7.35  
7.34  
7.33  
7.33  
7.24  
7.23  
7.23  
7.22  
7.22  
7.21  
7.20  
5.19  
5.17  
5.16  
5.15  
-3.77  
1.57  
1.56

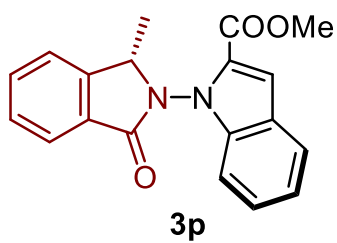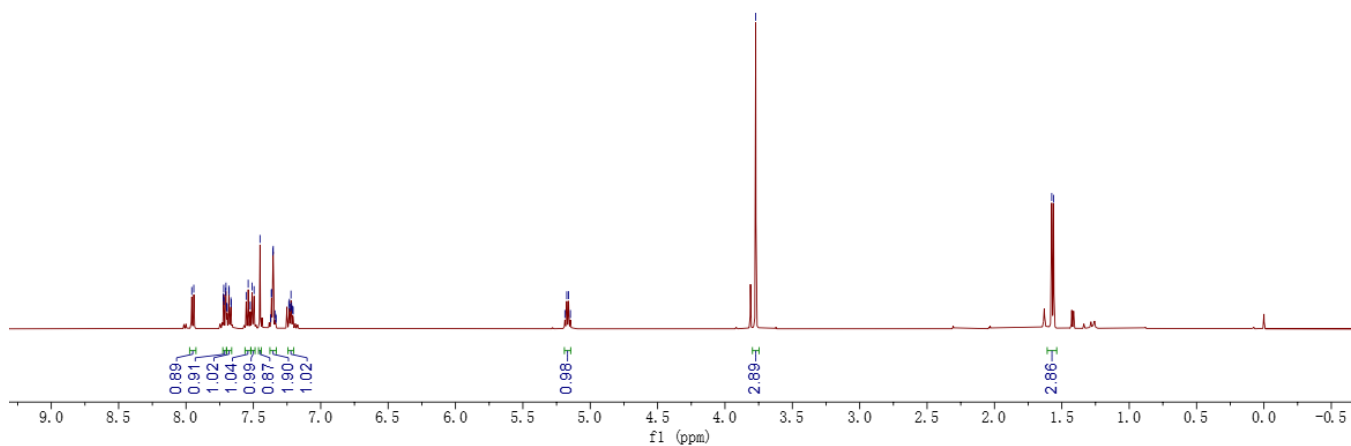



— 167.84  
— 160.93

— 145.91  
— 140.15  
— 133.03  
— 129.11  
— 126.48  
— 126.66  
— 126.30  
— 124.52  
— 124.09  
— 122.80  
— 122.35  
— 122.10  
— 111.79  
— 110.23

— 59.85  
— 51.88

— 17.94

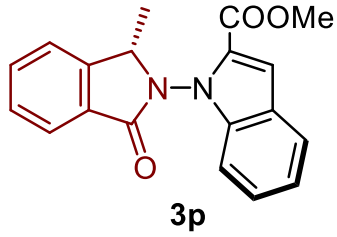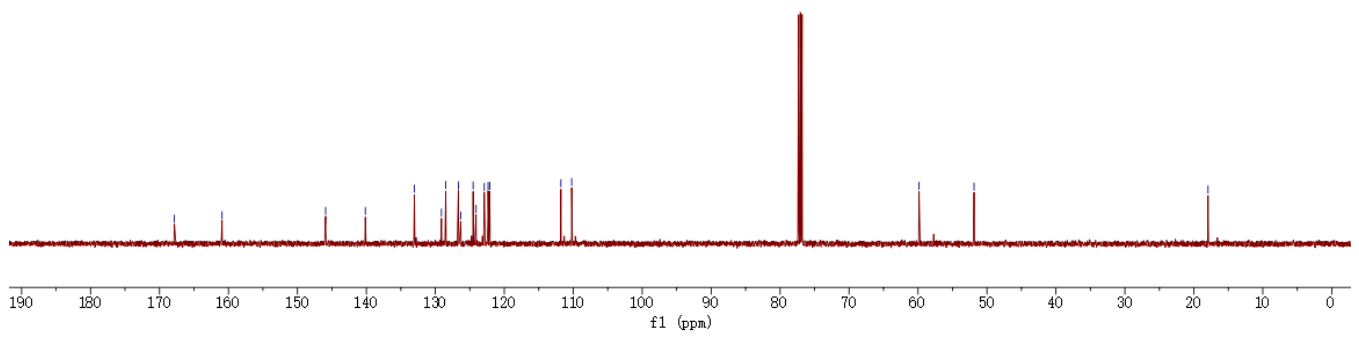

7.95  
7.93  
7.71  
7.69  
7.68  
7.66  
7.65  
7.54  
7.52  
7.51  
7.50  
7.48  
7.48  
7.35  
7.34  
7.33  
7.22  
7.22  
7.21  
7.21  
7.20  
7.20  
7.19

5.17  
5.15  
5.14  
5.13

4.23  
4.21  
4.20  
4.18

1.56  
1.54  
1.21  
1.19  
1.17  
1.16

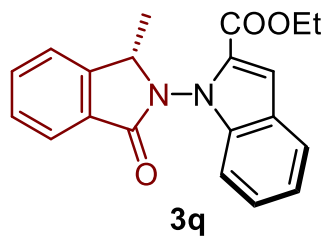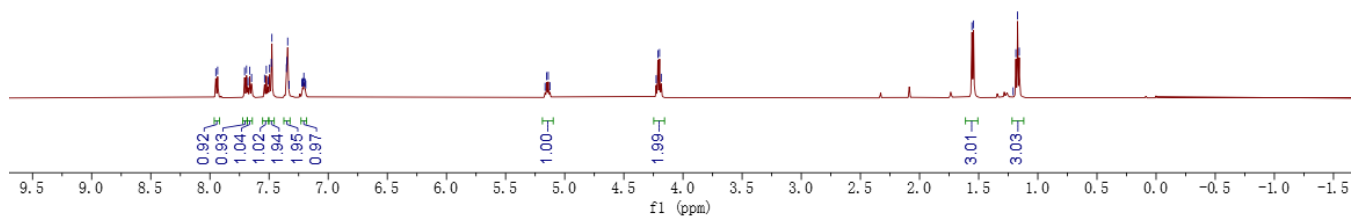

0.92  
0.93  
1.04  
1.02  
1.94  
1.95  
0.97

1.00

1.99

3.01

3.03

— 167.83  
 — 160.48  
 — 145.94  
 — 140.16  
 — 133.07  
 — 129.22  
 — 128.53  
 — 126.88  
 — 126.60  
 — 124.51  
 — 124.16  
 — 122.88  
 — 122.39  
 — 122.09  
 — 111.89  
 — 110.26  
 — 60.88  
 — 59.93  
 — 18.00  
 — 14.07

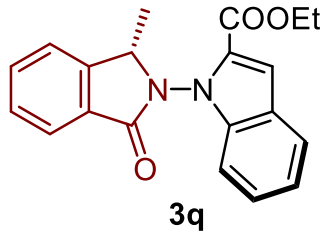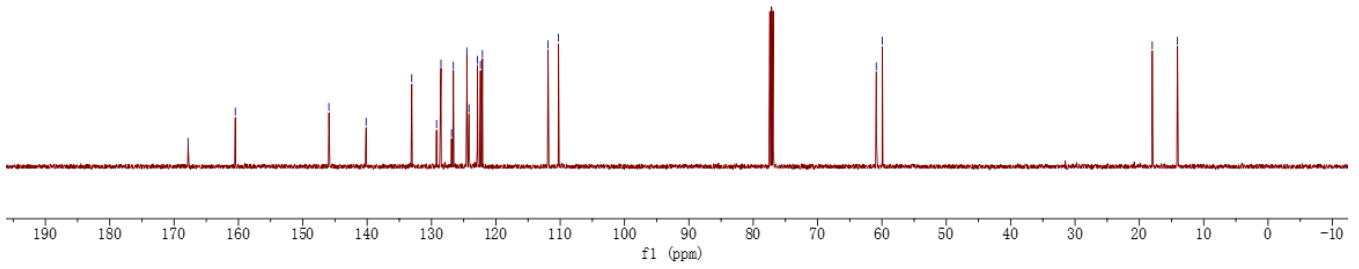

7.96  
 7.94  
 7.70  
 7.69  
 7.67  
 7.66  
 7.55  
 7.54  
 7.53  
 7.52  
 7.50  
 7.49  
 7.49  
 7.48  
 7.47  
 7.35  
 7.34  
 7.34  
 7.22  
 7.21  
 7.20  
 7.19  
 7.18  
 5.13  
 5.12  
 5.11  
 5.11  
 4.81  
 4.81  
 4.80  
 4.79  
 1.96  
 1.89  
 1.63  
 1.62  
 1.62  
 1.61  
 1.60  
 1.59  
 1.59  
 1.57  
 1.56  
 1.55  
 1.54  
 1.40  
 1.39  
 1.38  
 1.18  
 1.18  
 1.17  
 1.17  
 1.00  
 1.00  
 0.99  
 0.97  
 0.89  
 0.89  
 0.87  
 0.86  
 0.85  
 0.85  
 0.84  
 0.83  
 0.82  
 0.81  
 0.79  
 0.77  
 0.74  
 0.73  
 0.72  
 0.71  
 0.70

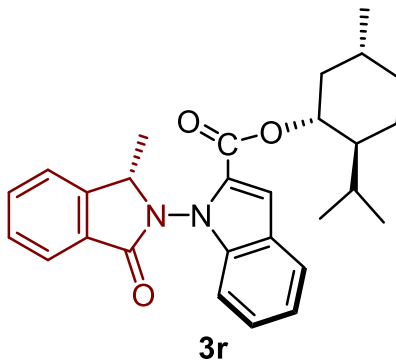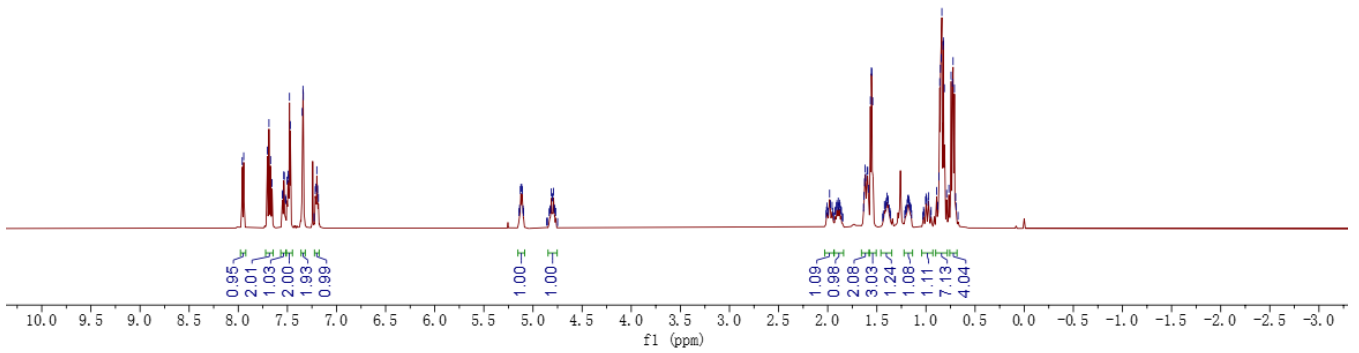

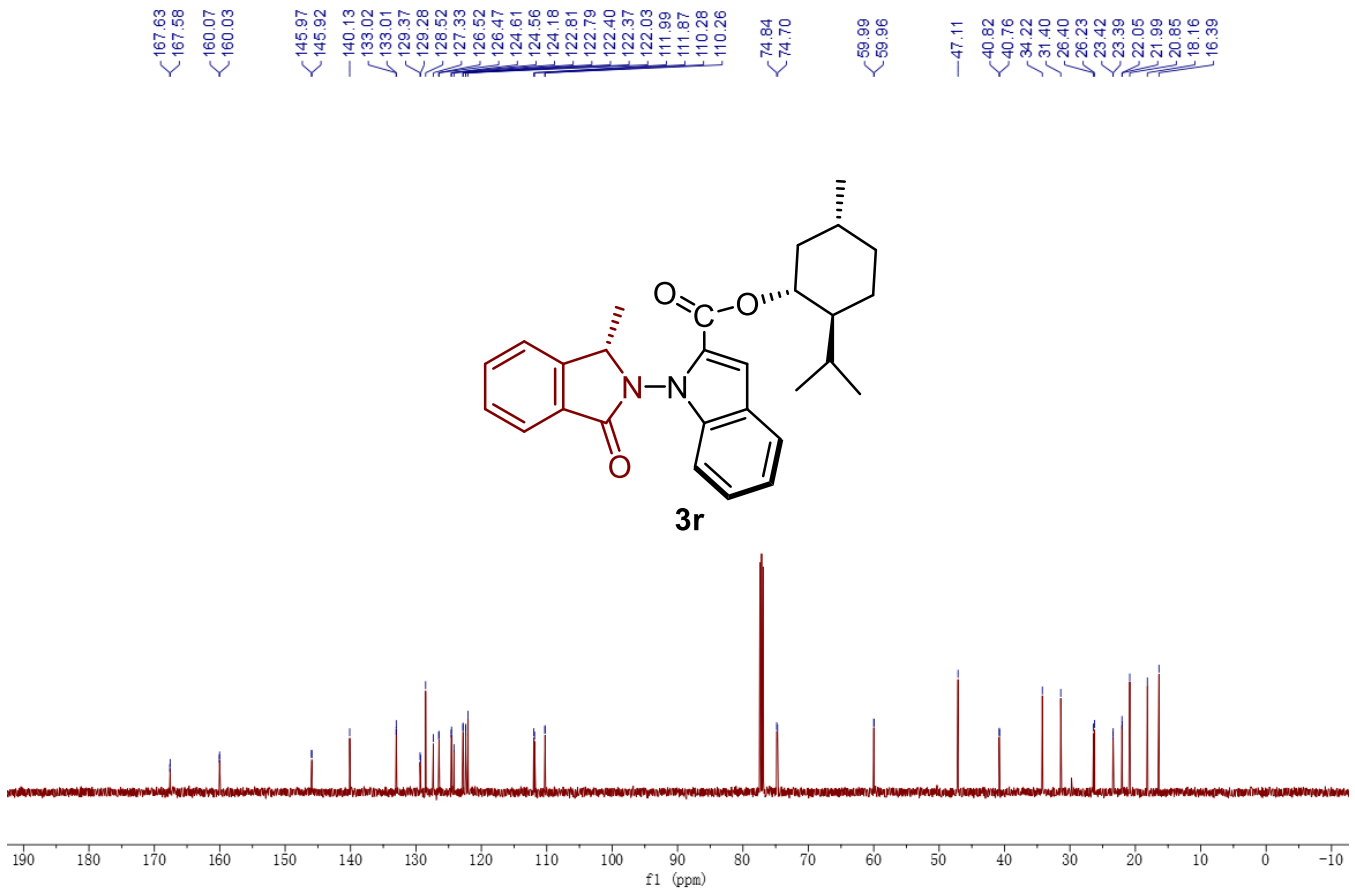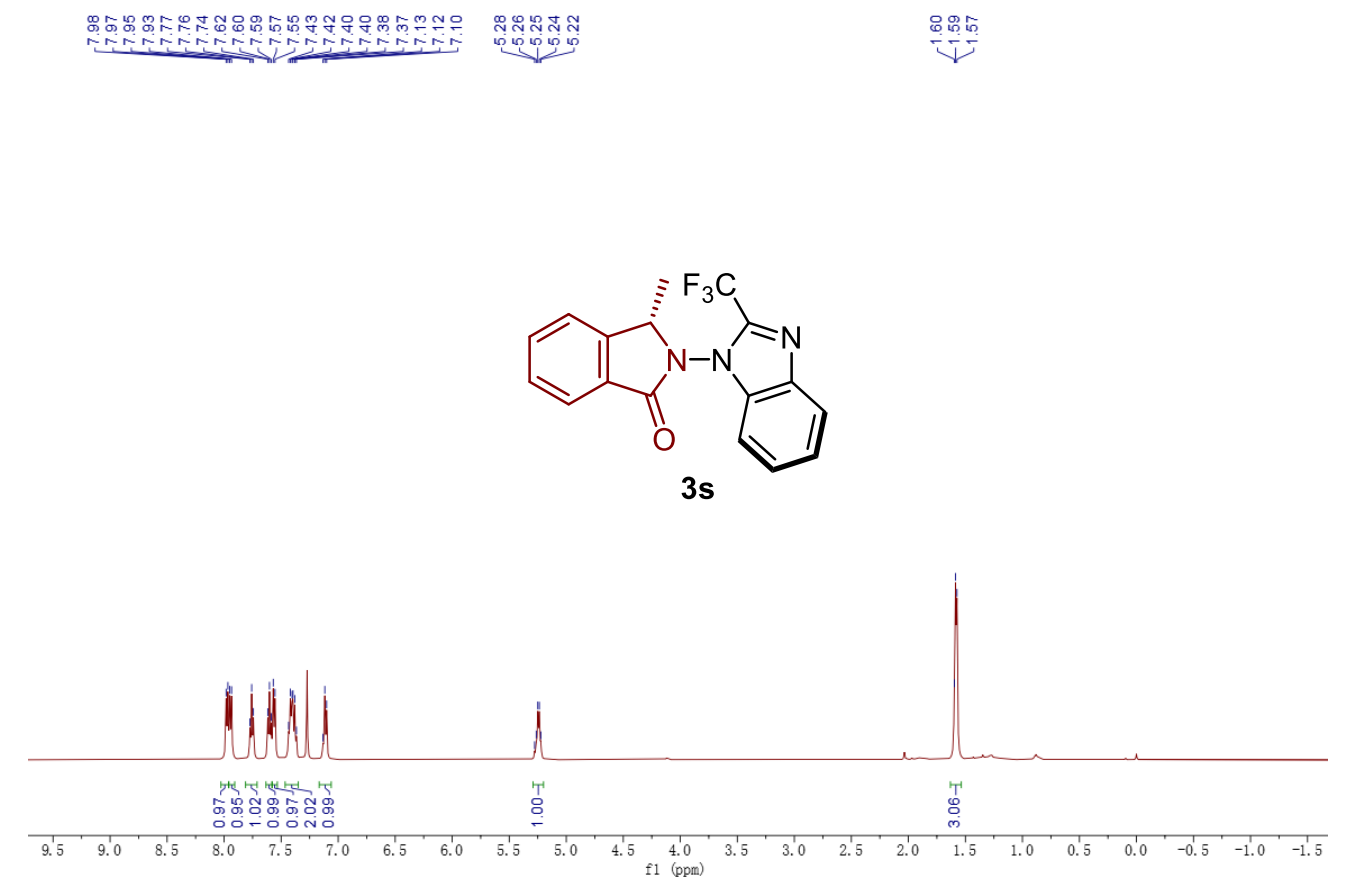

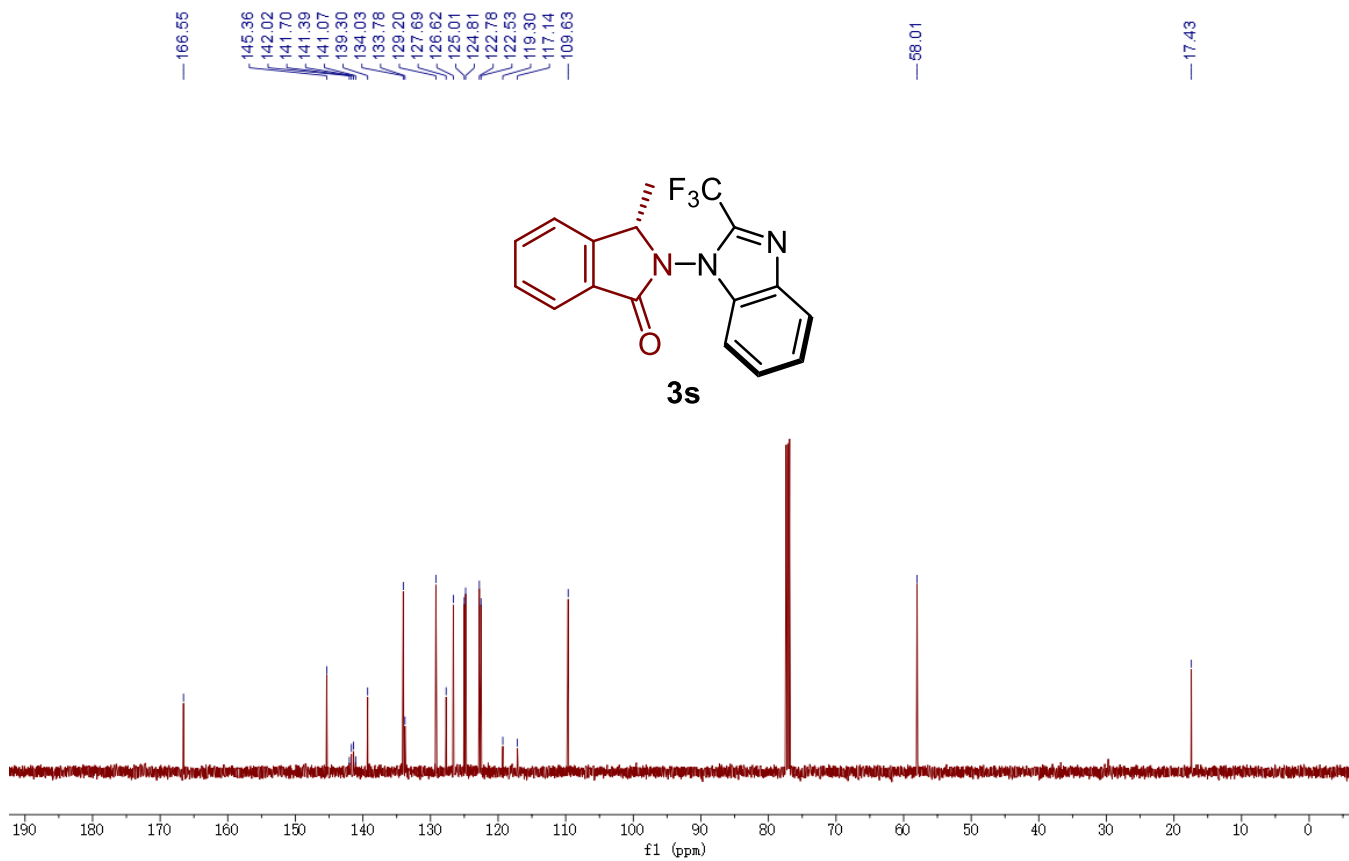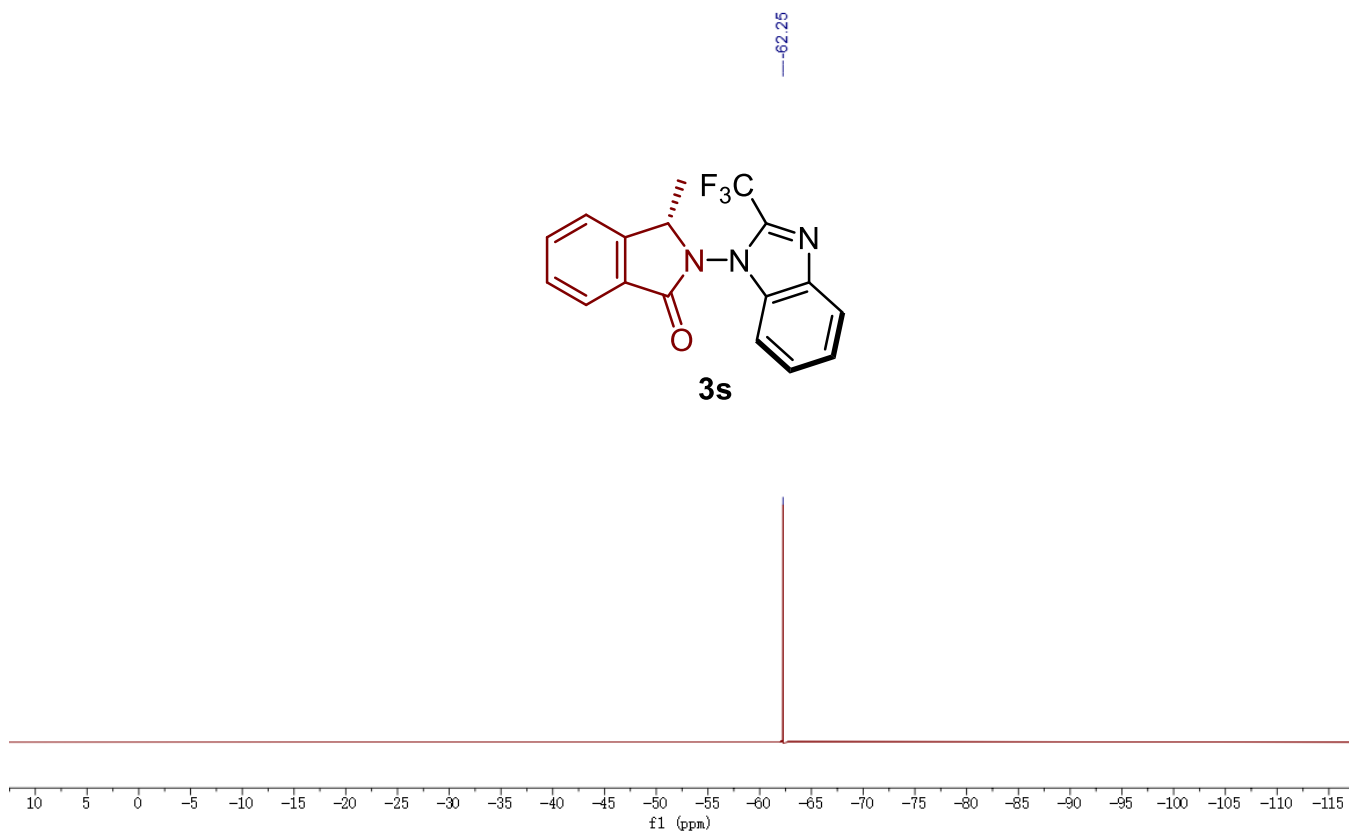

7.96  
7.95  
7.71  
7.70  
7.65  
7.54  
7.53  
7.51  
7.50  
7.48  
7.44  
7.43  
7.41  
7.38  
7.37  
7.29  
7.27  
7.26  
7.21  
7.20  
7.18  
6.92  
6.90

5.10  
5.09  
5.07  
5.06

2.46

1.62  
1.61

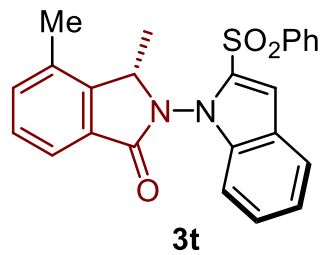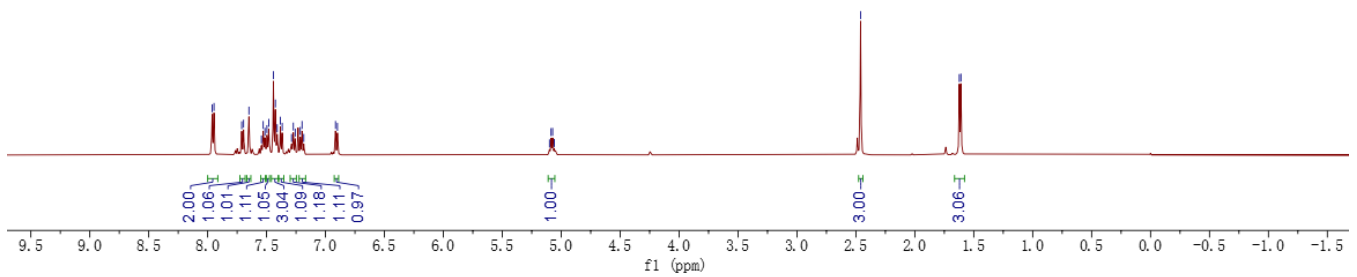

166.95  
143.02  
140.92  
138.90  
138.16  
136.80  
134.43  
133.58  
128.98  
128.52  
128.34  
126.98  
124.64  
124.20  
123.49  
122.75  
122.47  
112.24  
110.07

58.11

21.43  
17.57

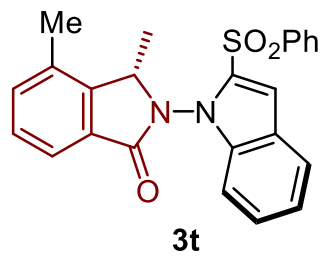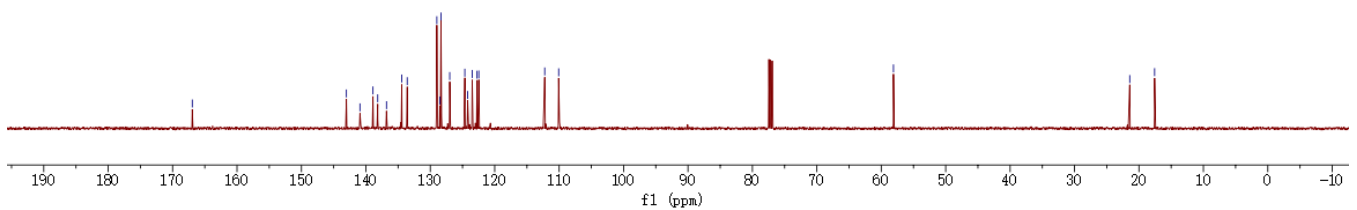

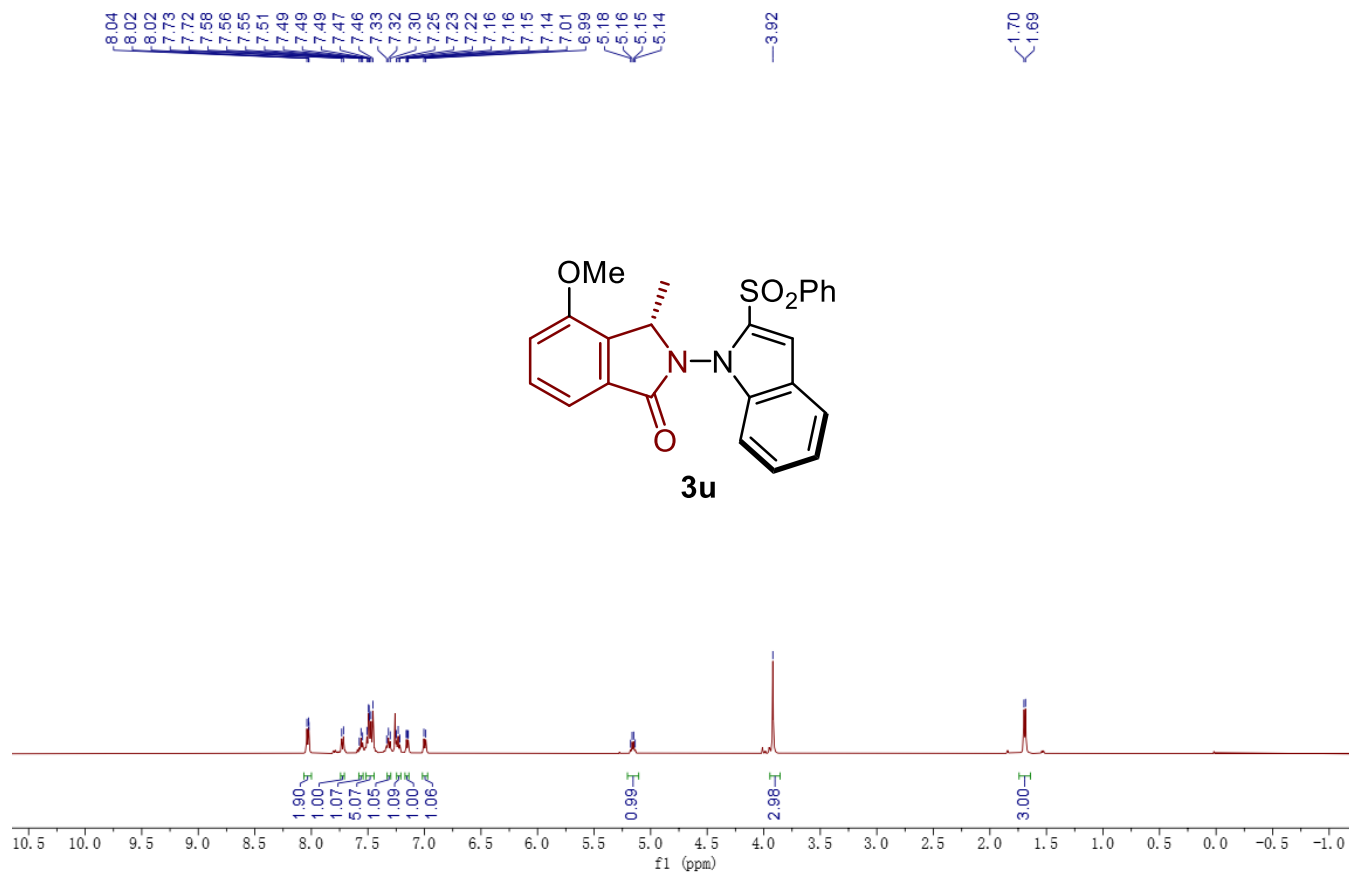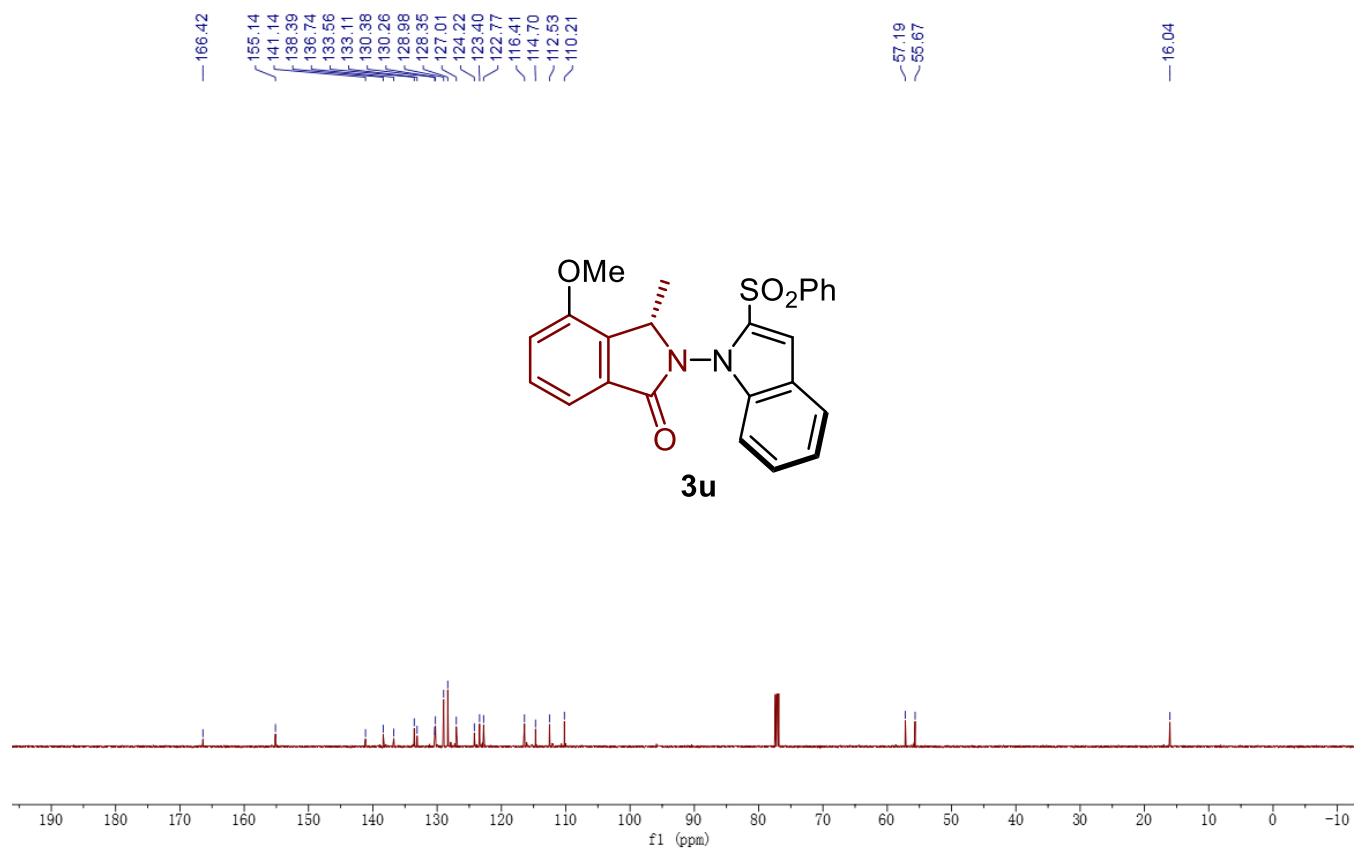

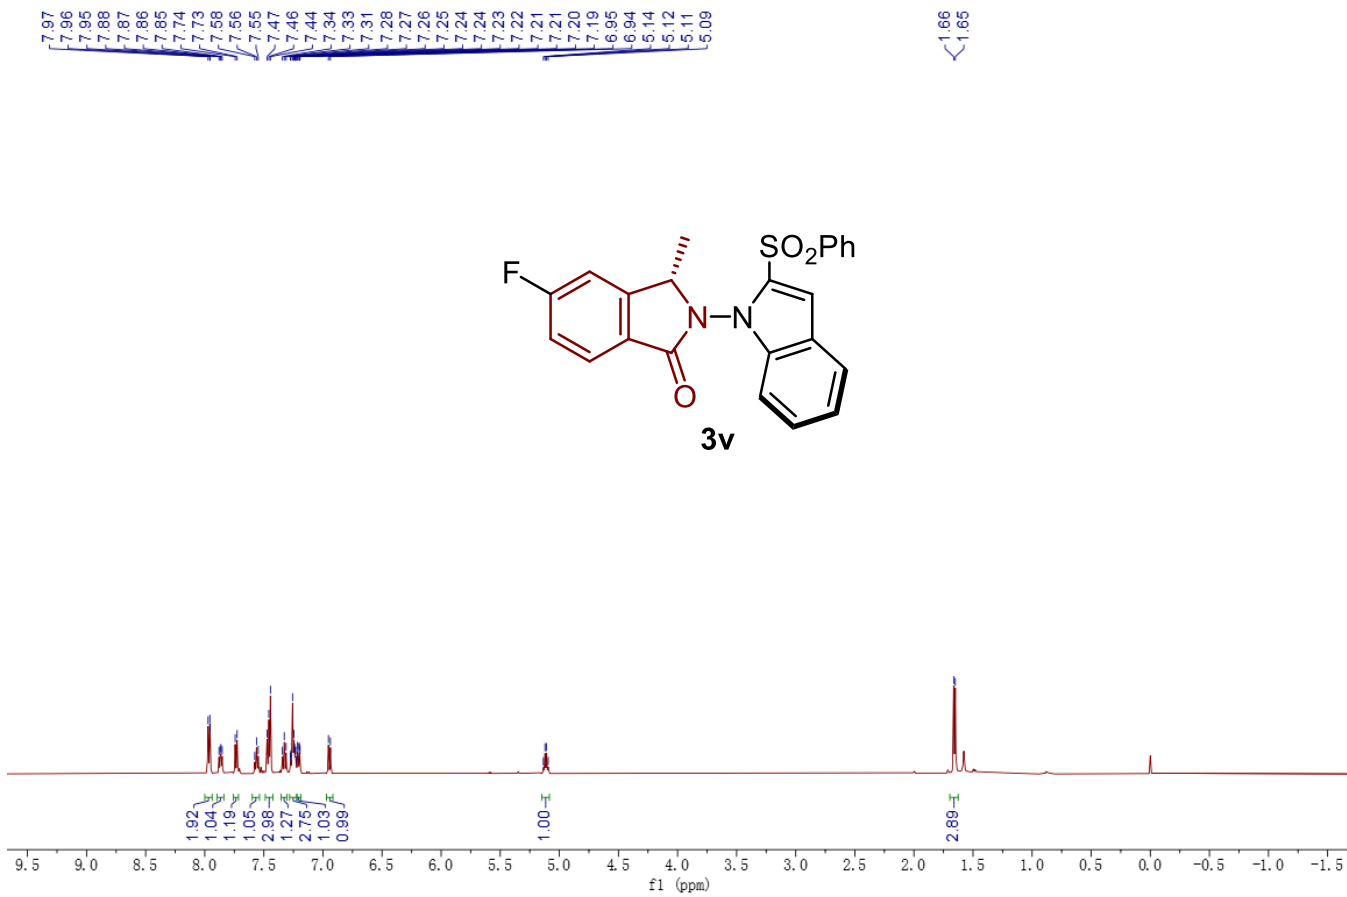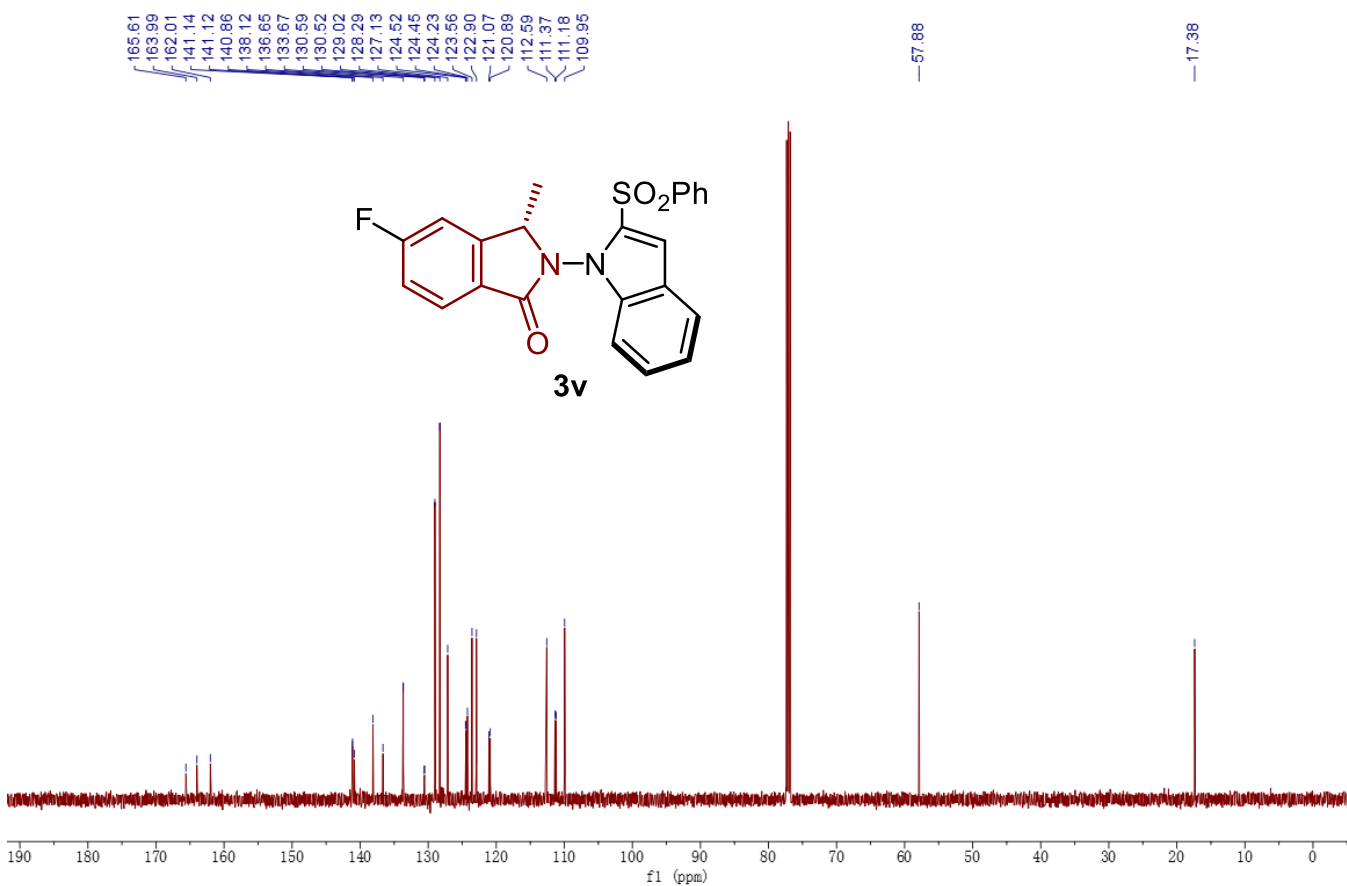

103.69  
103.70  
103.70  
103.72  
103.73

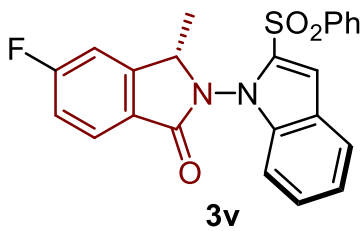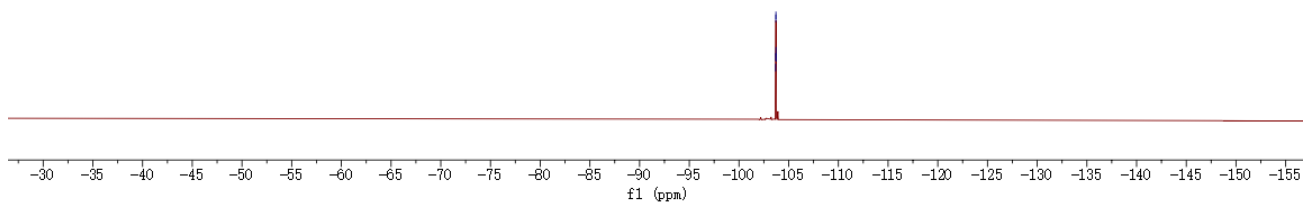

7.97  
7.95  
7.95  
7.74  
7.72  
7.58  
7.57  
7.55  
7.54  
7.53  
7.53  
7.50  
7.49  
7.48  
7.48  
7.46  
7.45  
7.43  
7.42  
7.41  
7.41  
7.39  
7.34  
7.33  
7.31  
7.25  
7.24  
7.23  
6.96  
6.95  
6.12  
6.11  
6.09

1.65  
1.63

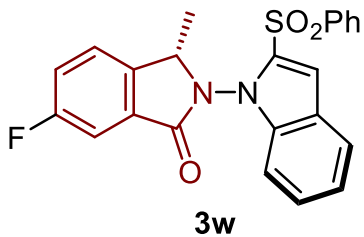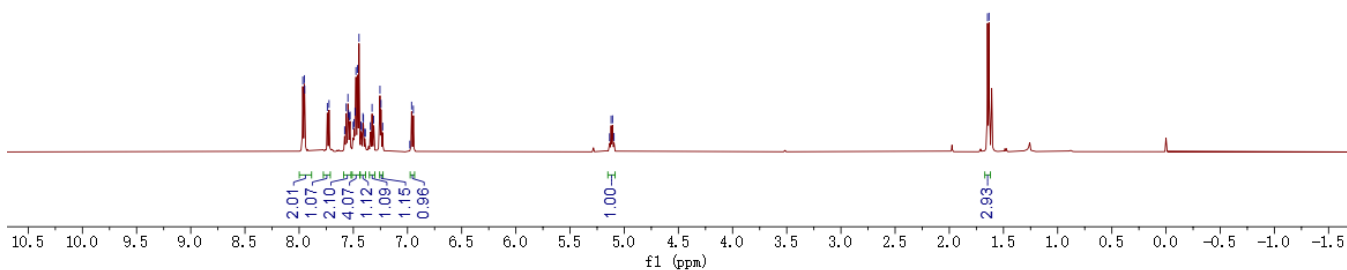



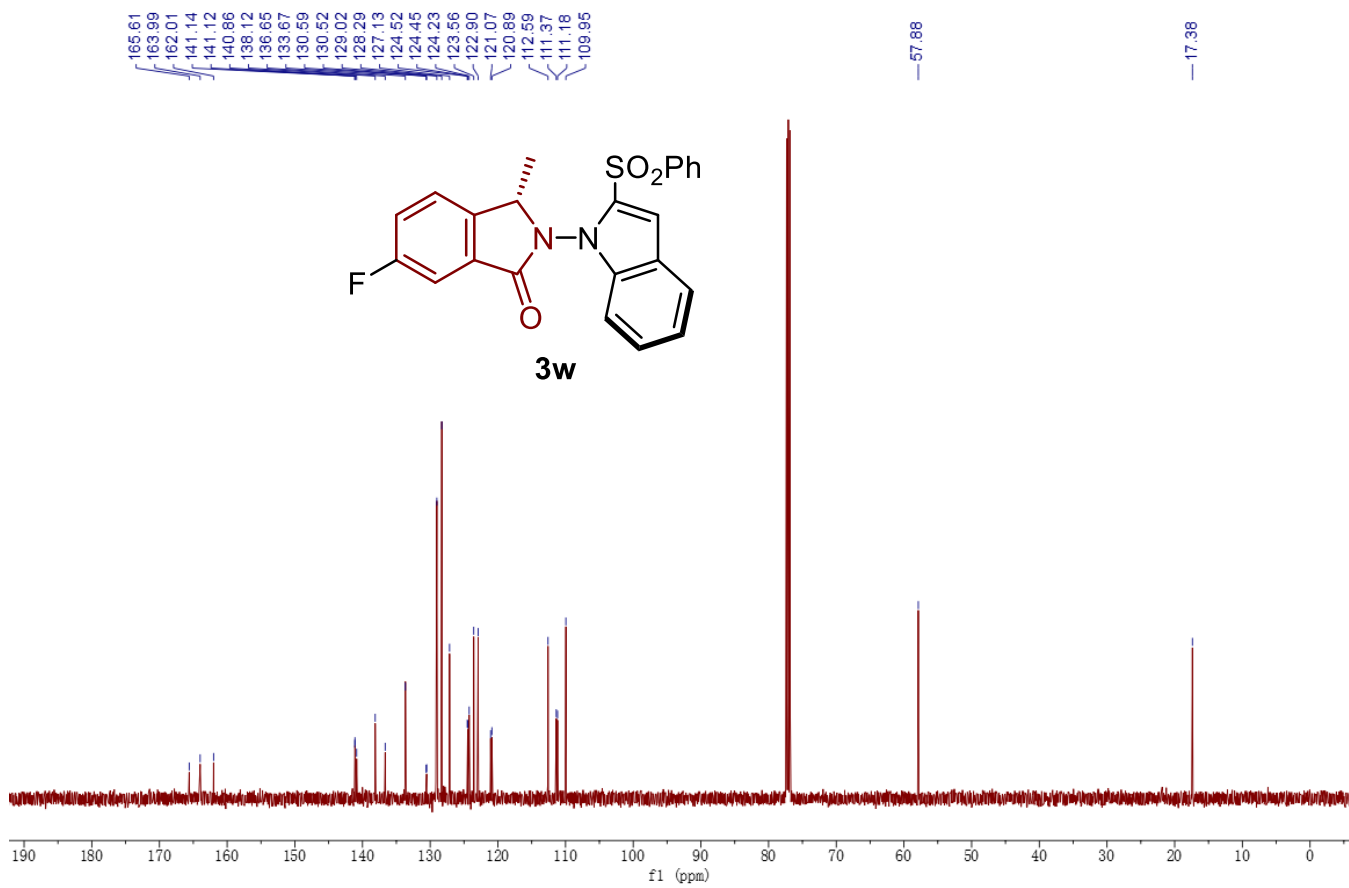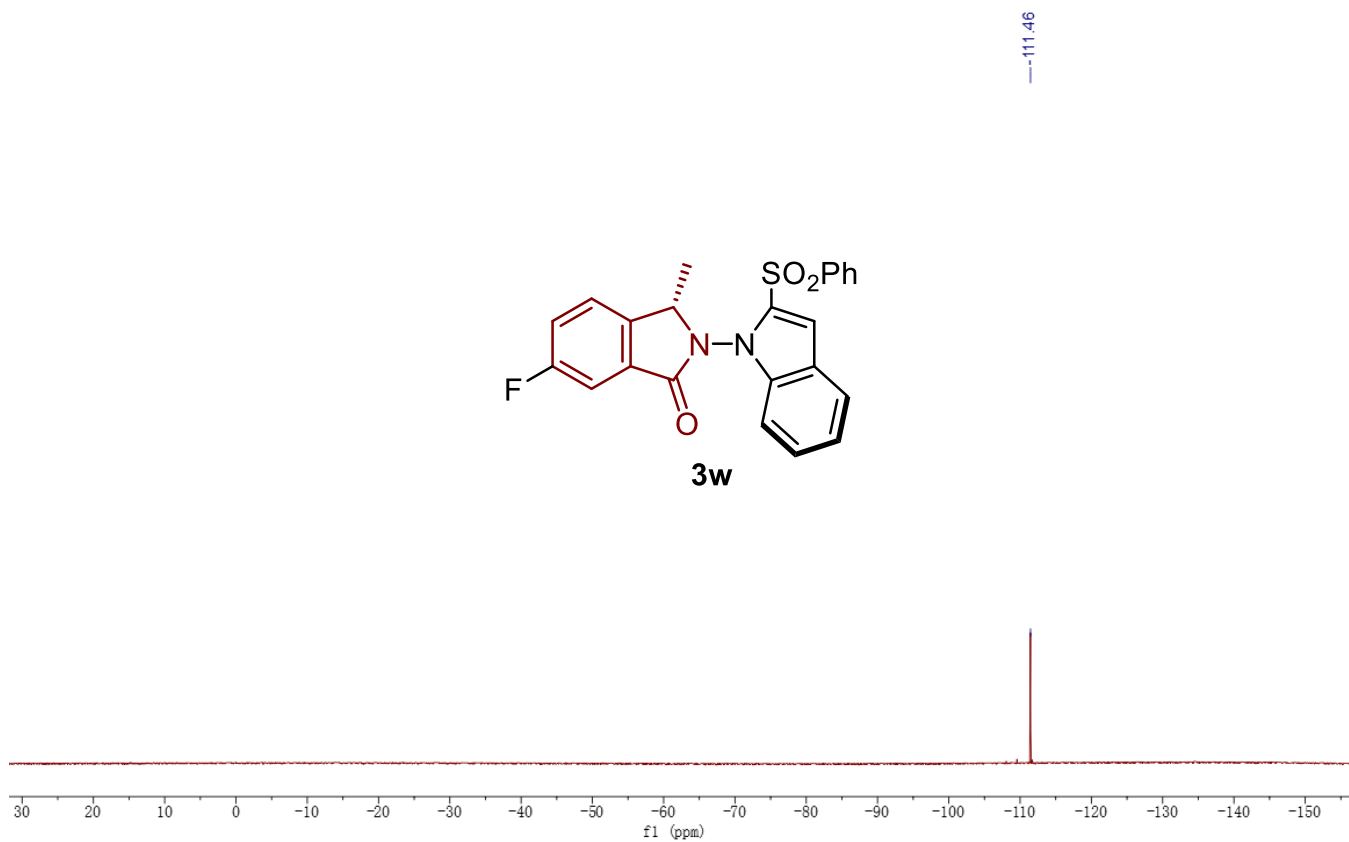

7.97  
7.95  
7.86  
7.85  
7.74  
7.73  
7.68  
7.67  
7.66  
7.59  
7.58  
7.57  
7.56  
7.49  
7.47  
7.46  
7.45  
7.34  
7.33  
7.31  
7.25  
7.23  
6.96  
5.14  
5.12  
5.11  
5.10

1.65  
1.64

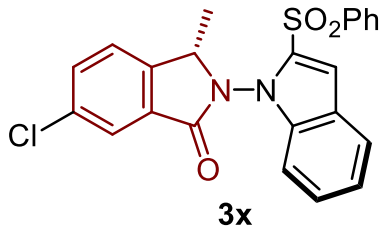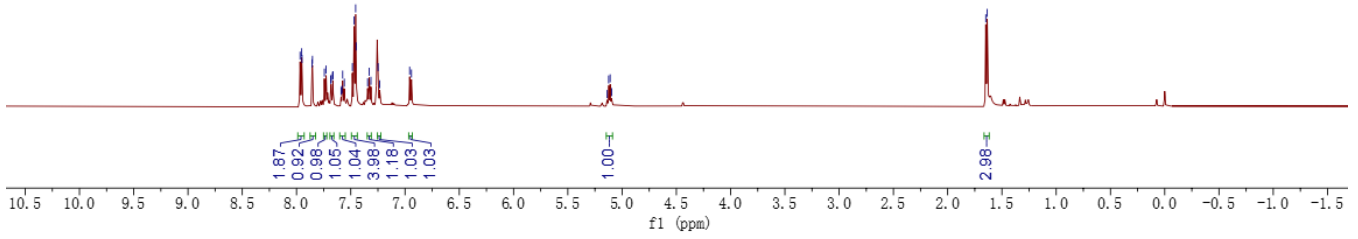

165.34  
143.71  
140.84  
138.09  
136.63  
135.16  
133.68  
133.55  
130.29  
129.03  
128.28  
127.15  
124.66  
124.24  
124.09  
123.58  
122.92  
112.62  
109.92

57.90

17.26

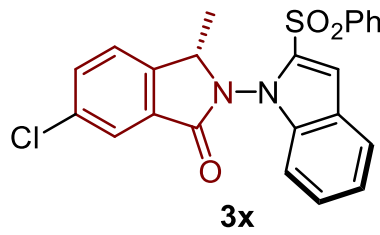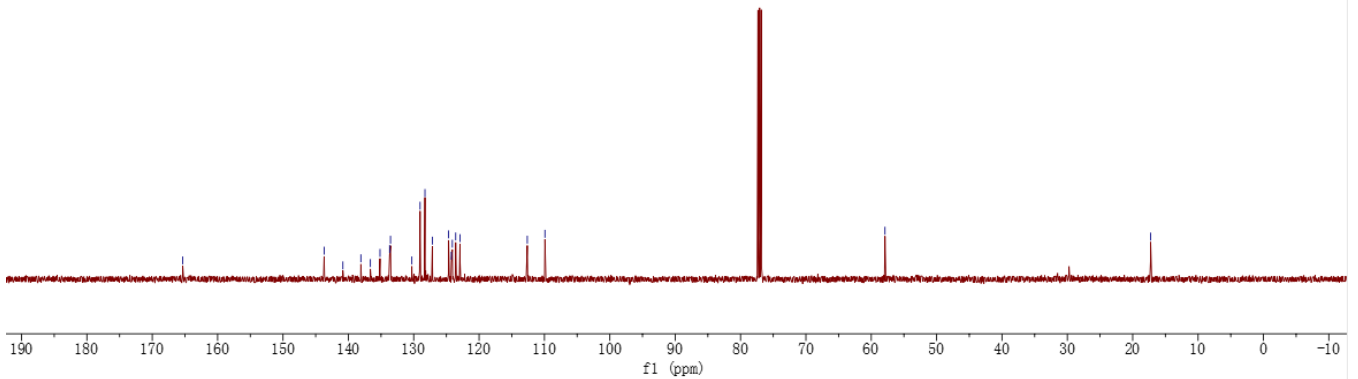

8.02  
8.01  
7.96  
7.95  
7.83  
7.83  
7.82  
7.81  
7.74  
7.72  
7.58  
7.57  
7.55  
7.48  
7.47  
7.45  
7.41  
7.39  
7.34  
7.33  
7.31  
7.26  
7.25  
7.24  
7.23  
6.95  
6.93  
5.11  
5.10  
5.08  
5.07

1.65  
1.63

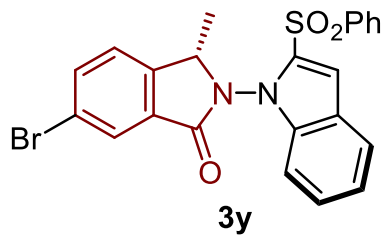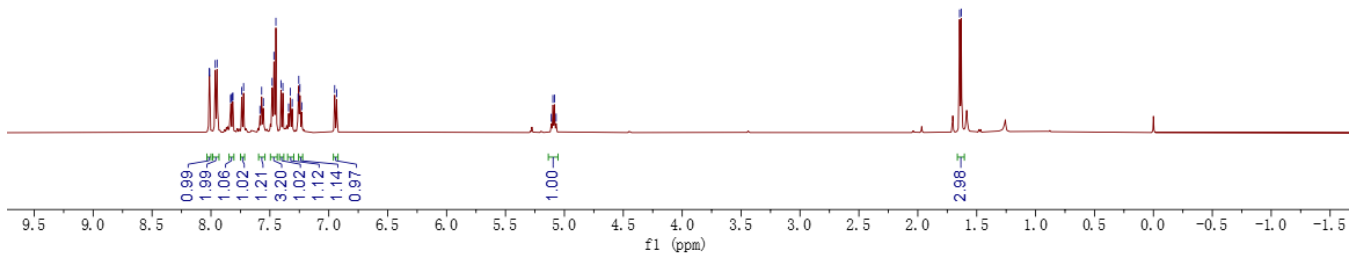

165.18  
144.19  
140.84  
138.09  
136.65  
136.35  
133.67  
130.55  
128.02  
128.27  
127.67  
127.14  
124.36  
124.25  
123.57  
122.92  
122.88  
112.62  
109.91

57.95

17.18

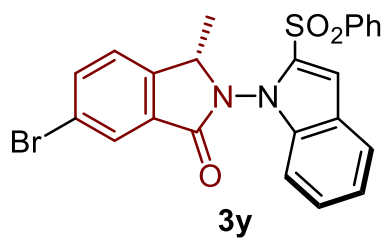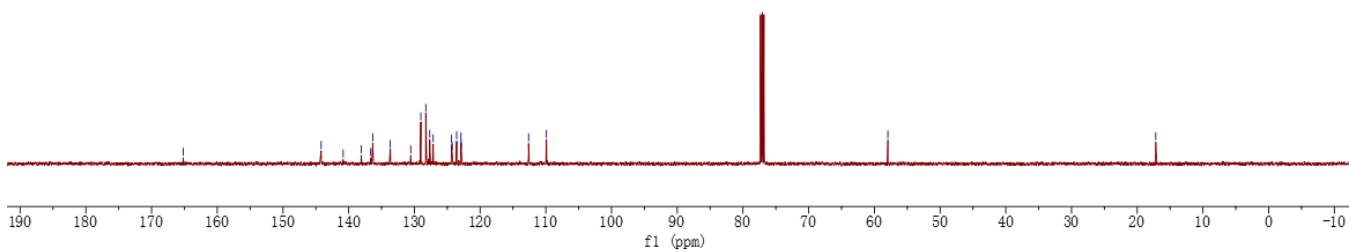

8.22  
8.21  
8.02  
8.02  
8.00  
8.00  
7.96  
7.96  
7.96  
7.94  
7.94  
7.74  
7.72  
7.59  
7.59  
7.58  
7.58  
7.57  
7.57  
7.56  
7.56  
7.56  
7.55  
7.55  
7.48  
7.46  
7.45  
7.34  
7.33  
7.32  
7.32  
7.32  
7.30  
7.30  
7.28  
7.27  
7.24  
7.23  
7.22  
7.21  
7.21  
6.94  
6.93  
6.93  
5.10  
5.07  
5.07

1.63  
1.62

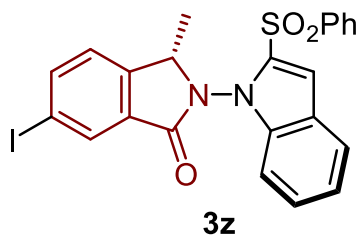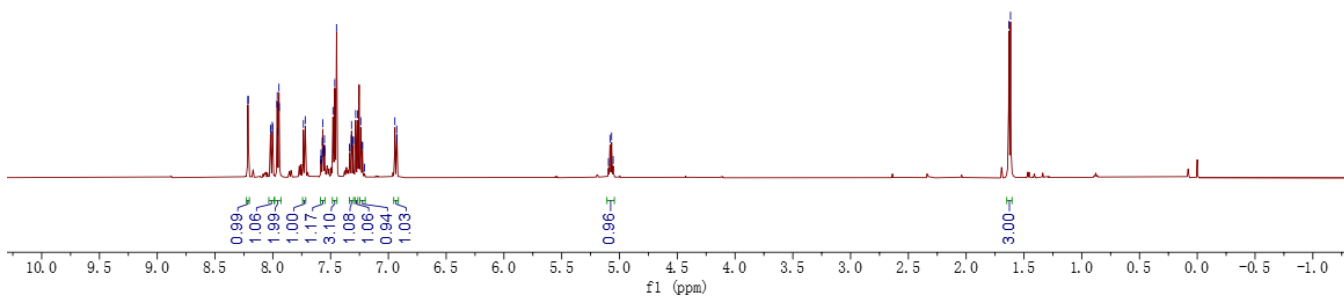

165.04  
144.85  
142.10  
140.82  
138.08  
136.59  
133.71  
133.59  
130.60  
129.05  
128.28  
127.17  
124.56  
124.23  
123.59  
122.94  
112.64  
109.94  
93.85  
58.00  
17.15

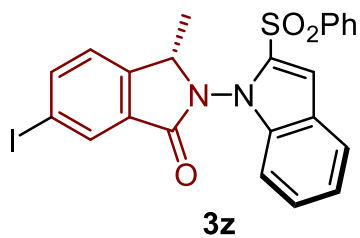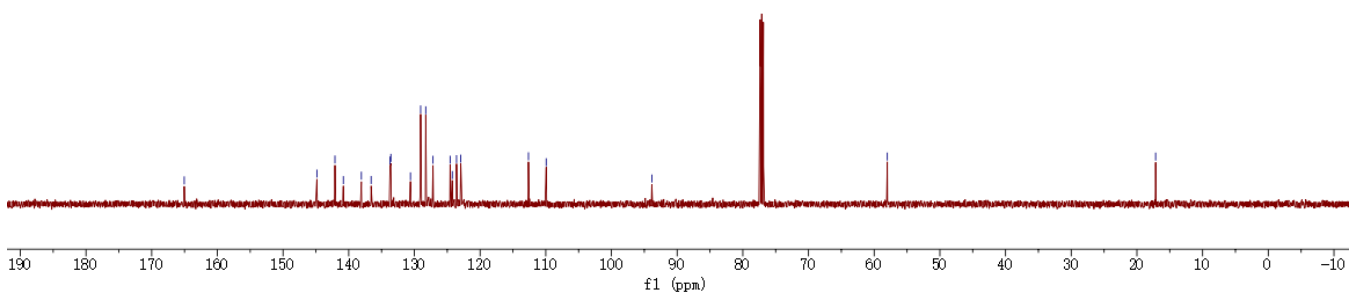

8.03  
8.03  
8.02  
8.01  
7.74  
7.74  
7.73  
7.72  
7.71  
7.70  
7.56  
7.56  
7.55  
7.54  
7.54  
7.53  
7.53  
7.52  
7.47  
7.46  
7.44  
7.44  
7.43  
7.33  
7.32  
7.31  
7.31  
7.29  
7.29  
7.22  
7.20  
7.01  
6.99  
5.14  
5.13  
5.11  
5.10

-2.43

1.65  
1.64

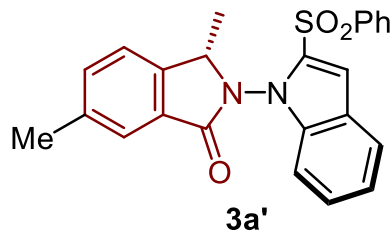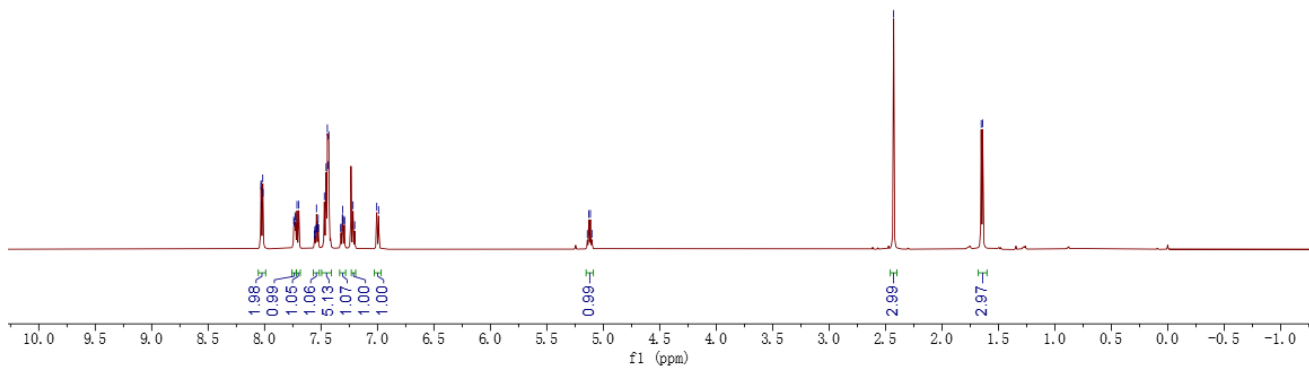

166.47

143.60  
141.23  
138.39  
136.76  
135.00  
133.60  
133.30  
129.01  
128.92  
128.84  
128.34  
127.07  
124.26  
123.44  
122.84  
122.25  
112.67  
110.25

57.91

18.81  
16.31

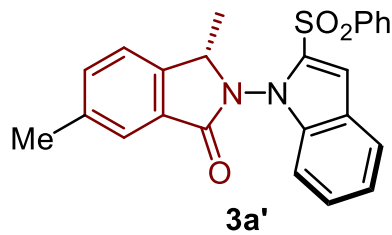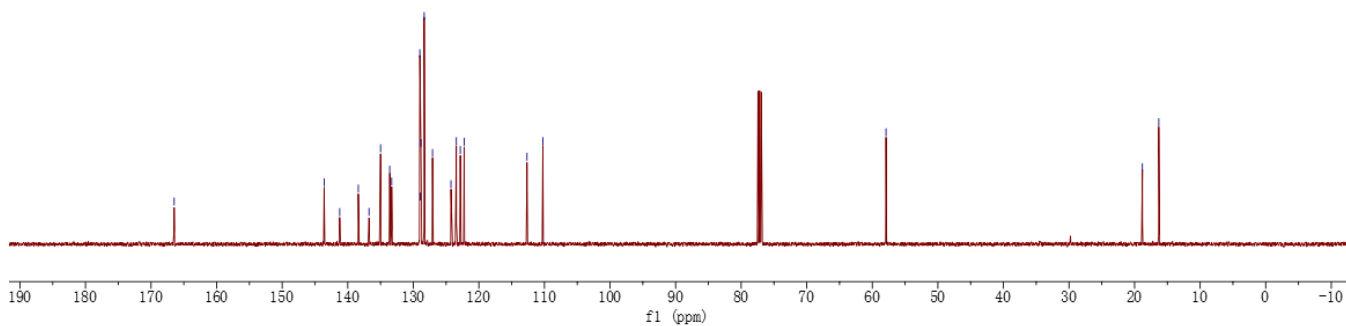

7.94  
7.92  
7.92  
7.73  
7.72  
7.61  
7.59  
7.58  
7.56  
7.54  
7.47  
7.46  
7.45  
7.45  
7.43  
7.42  
7.40  
7.38  
7.31  
7.30  
7.28  
7.24  
7.22  
7.21  
6.93  
5.12  
5.11  
5.09  
5.08

1.67  
1.66

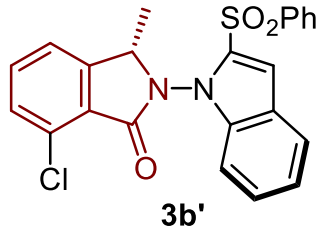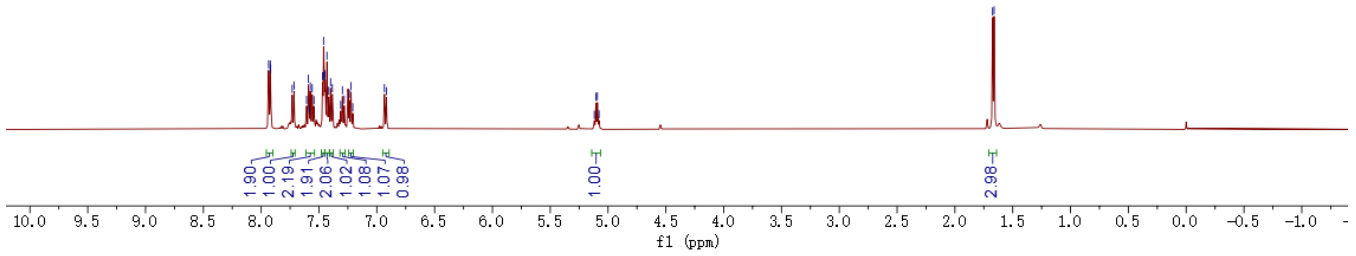

164.03  
147.91  
140.44  
138.13  
137.03  
134.03  
133.71  
133.35  
130.32  
129.02  
128.43  
127.02  
125.00  
124.27  
123.54  
122.79  
121.15  
112.24  
109.97

57.02

17.46

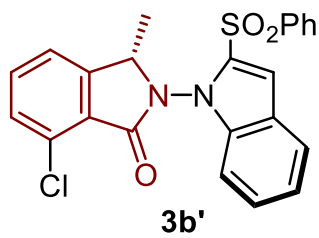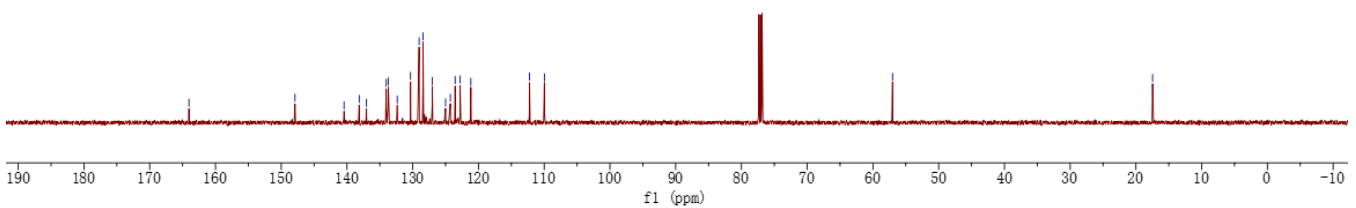

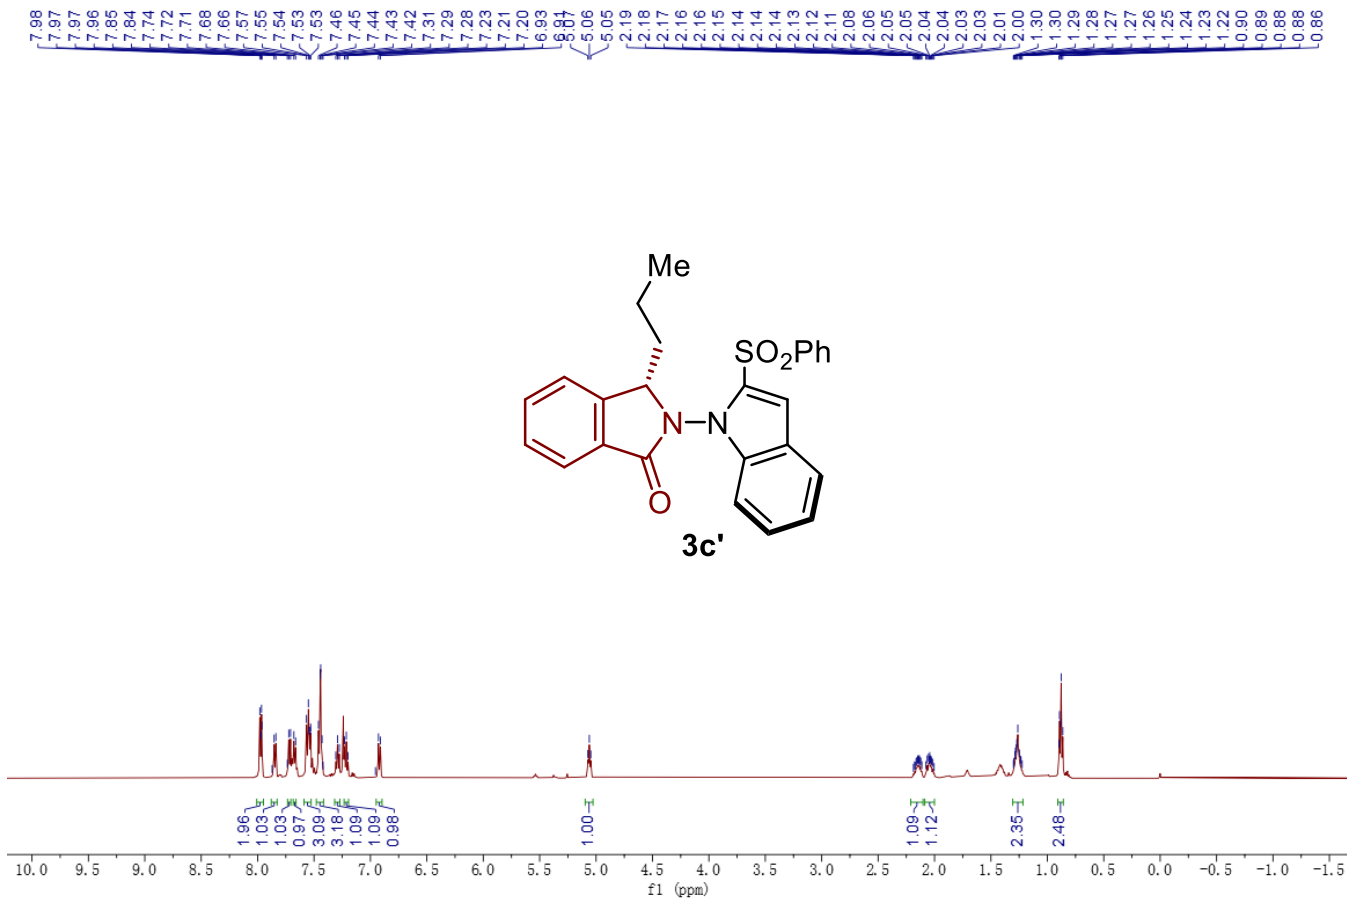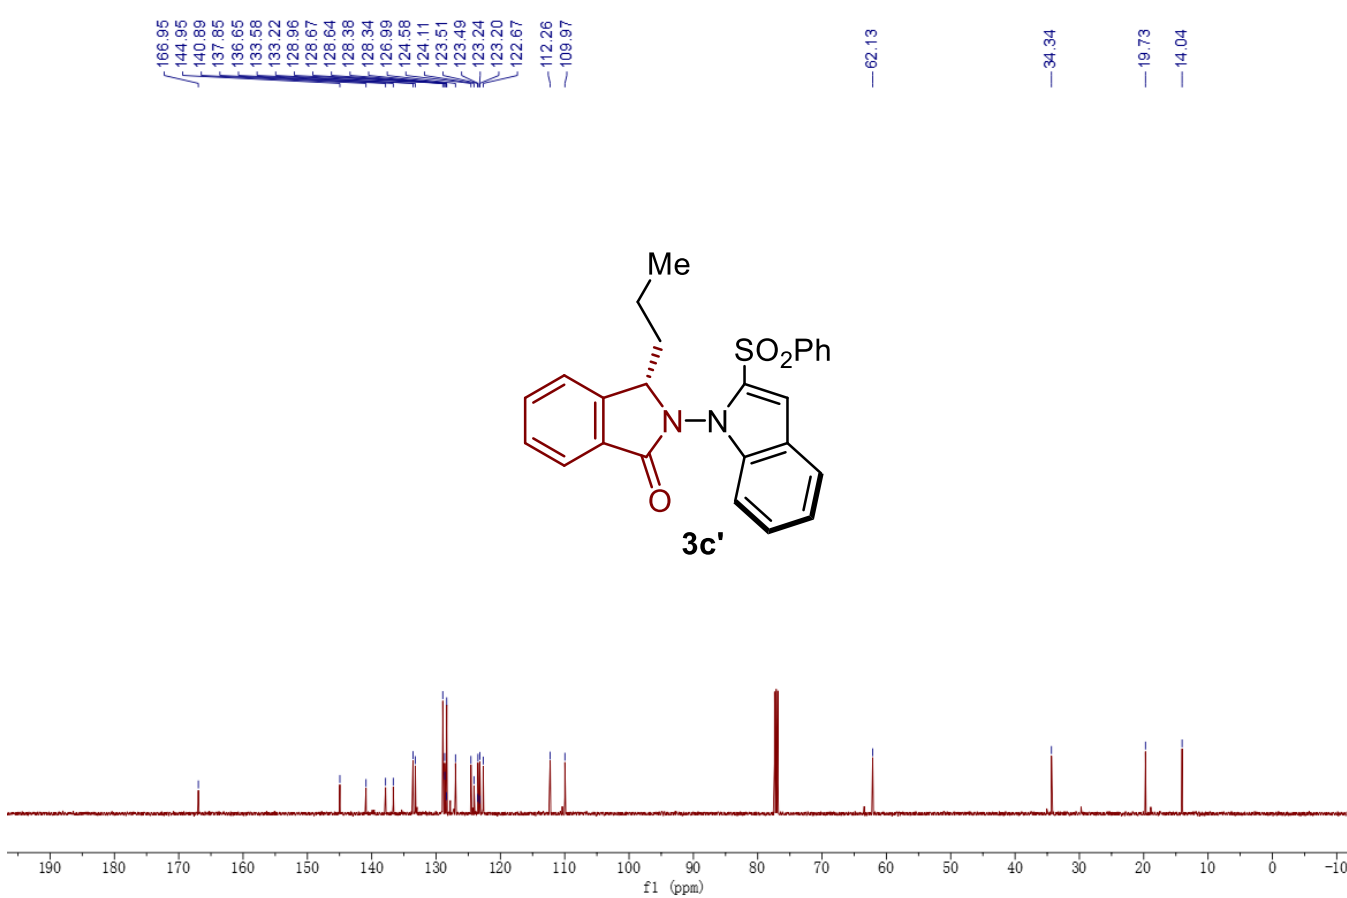

8.01  
8.00  
7.99  
7.89  
7.87  
7.76  
7.74  
7.73  
7.70  
7.68  
7.68  
7.59  
7.58  
7.57  
7.55  
7.48  
7.47  
7.45  
7.33  
7.31  
7.30  
7.25  
7.23  
7.22  
6.96  
6.94  
5.09  
5.07  
5.06  
2.21  
2.20  
2.19  
2.19  
2.18  
2.17  
2.16  
2.16  
2.15  
2.15  
2.11  
2.10  
2.09  
2.09  
2.08  
2.07  
2.06  
2.06  
2.05  
2.05  
1.32  
1.31  
1.29  
1.29  
1.28  
1.27  
1.25  
1.24  
1.22  
1.21  
1.20  
1.19  
1.17  
1.17  
1.16  
1.16  
1.15  
1.14  
1.13  
1.13  
1.12  
1.11  
0.86  
0.85  
0.84

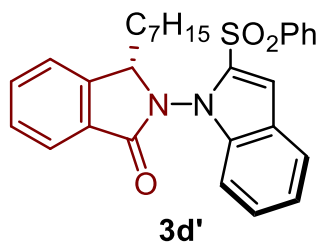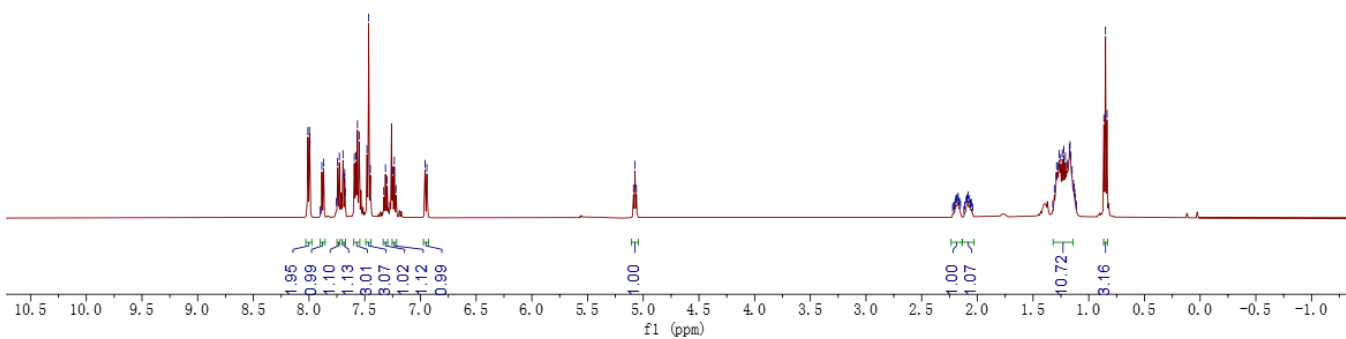

166.92  
145.06  
141.01  
137.92  
136.74  
133.59  
133.24  
128.98  
128.71  
128.69  
128.42  
128.37  
127.83  
127.02  
124.61  
124.17  
123.55  
123.51  
123.26  
123.23  
122.71  
112.33  
110.05  
62.16  
32.29  
31.71  
29.45  
29.03  
26.35  
22.60  
14.15  
14.09

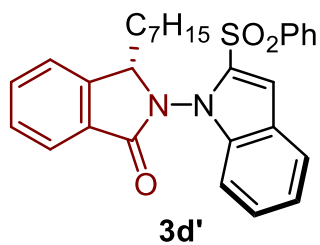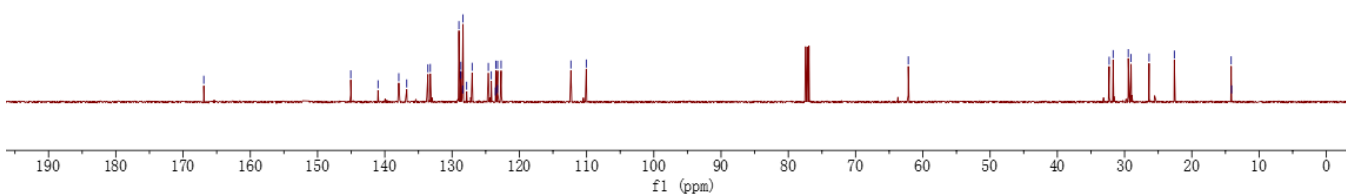



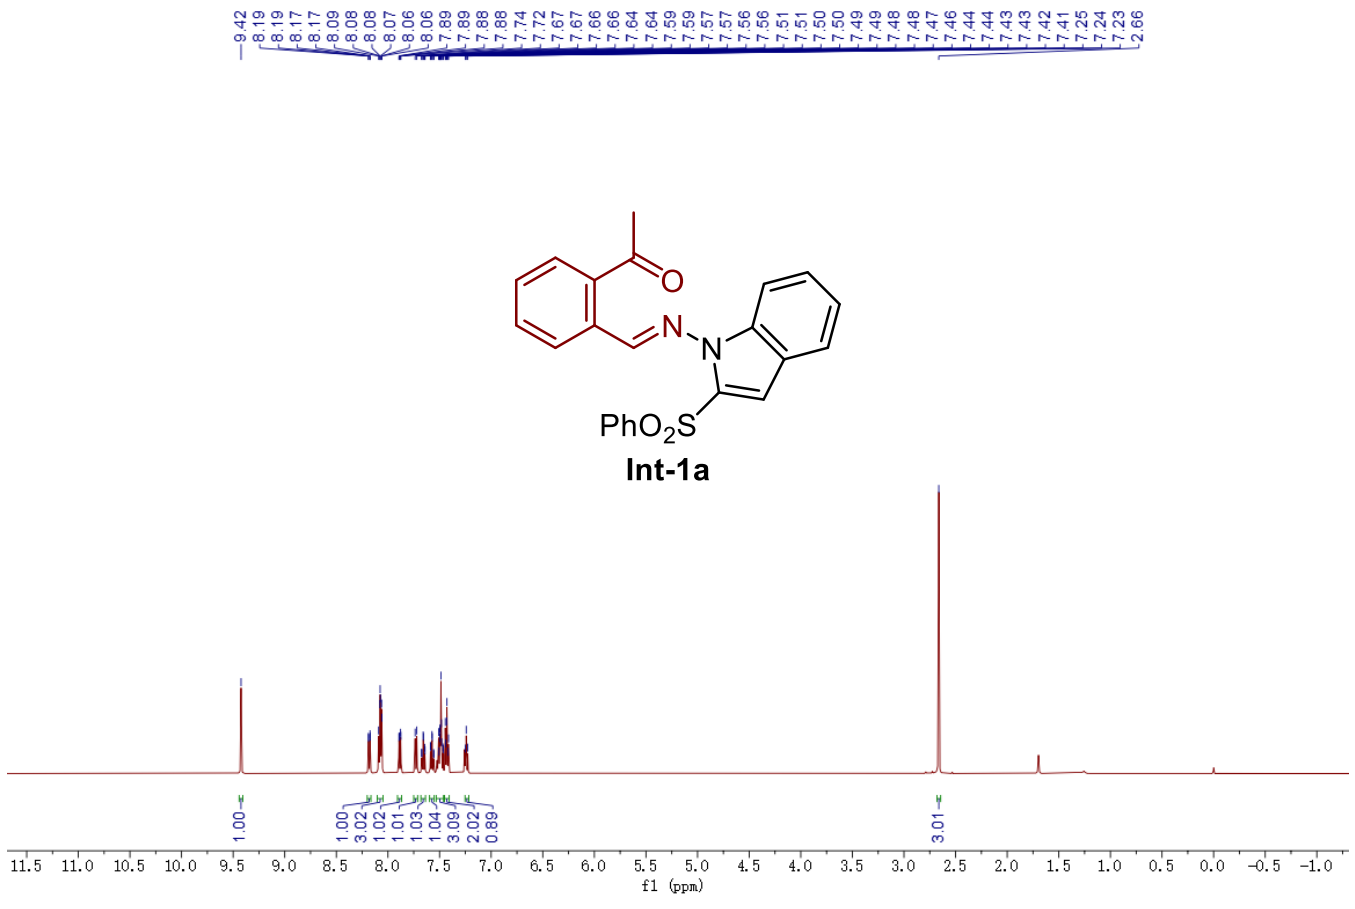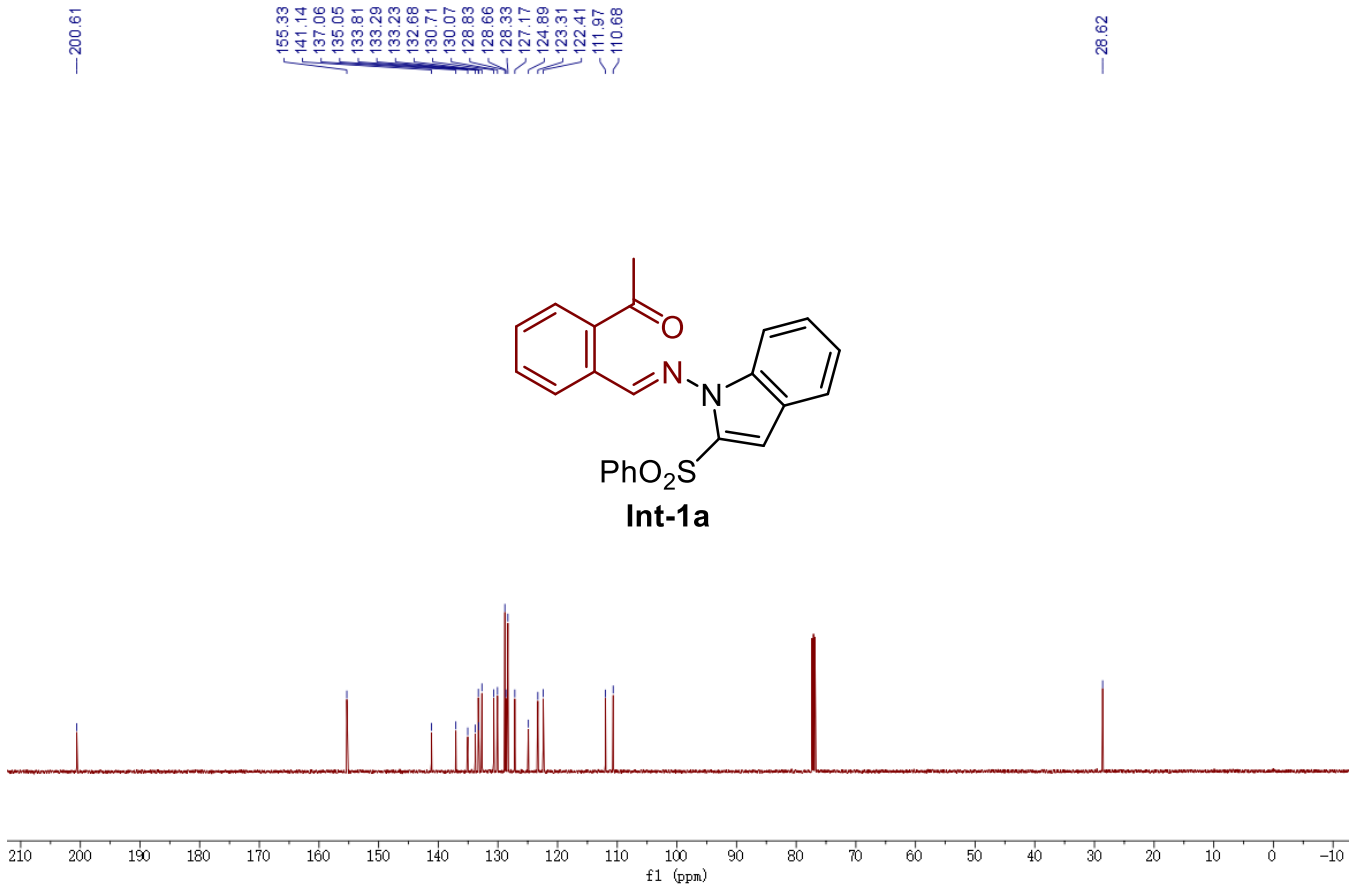

7.99  
7.98  
7.97  
7.97  
7.87  
7.86  
7.75  
7.73  
7.72  
7.70  
7.70  
7.69  
7.69  
7.57  
7.57  
7.56  
7.55  
7.54  
7.54  
7.53  
7.52  
7.50  
7.47  
7.47  
7.45  
7.44  
7.44  
7.32  
7.31  
7.30  
7.30  
7.29  
7.29  
7.25  
7.23  
7.22  
6.95  
6.94

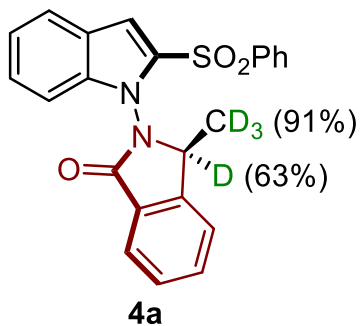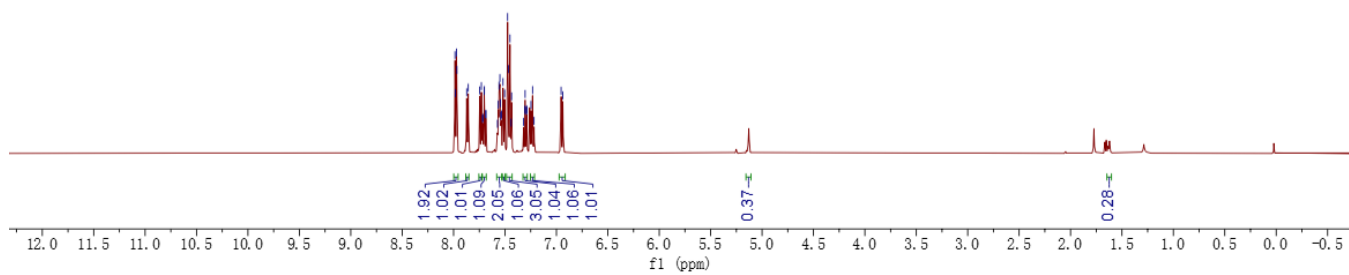

8.19  
8.18  
8.00  
7.98  
7.69  
7.68  
7.66  
7.57  
7.56  
7.54  
7.53  
7.50  
7.49  
7.48  
7.36  
7.35  
7.33  
7.26  
7.25  
7.23  
7.22  
5.07  
5.06  
2.57  
1.58  
1.56

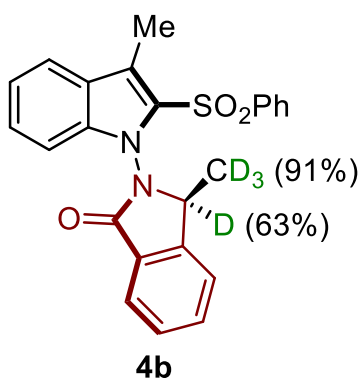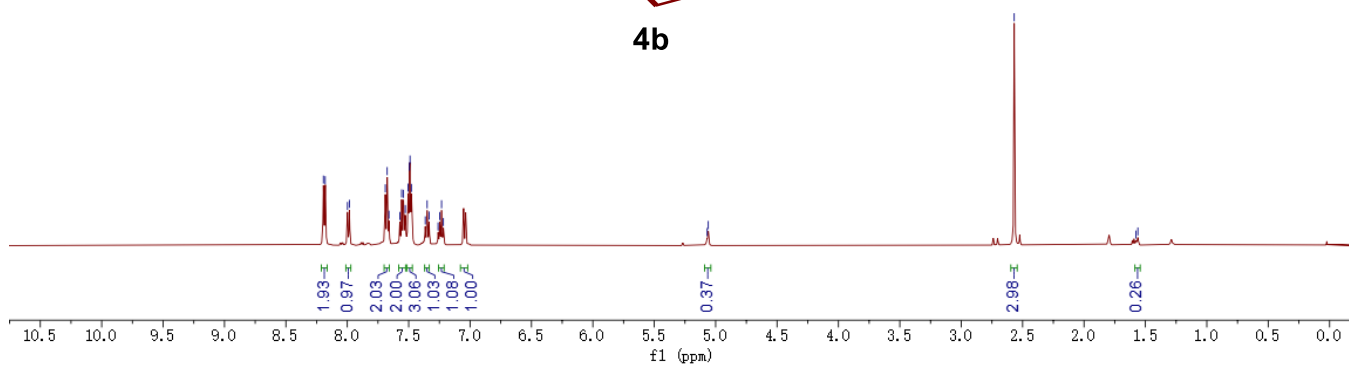

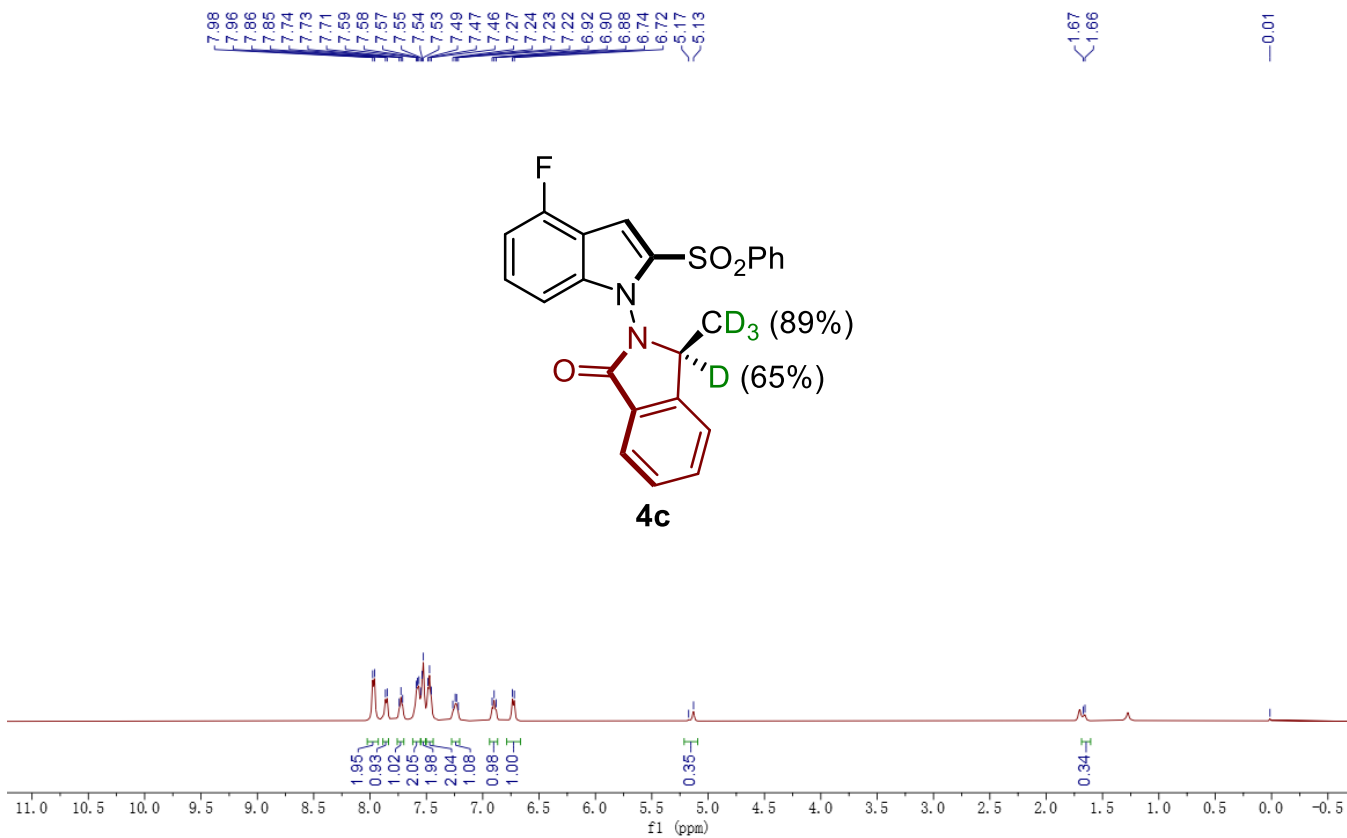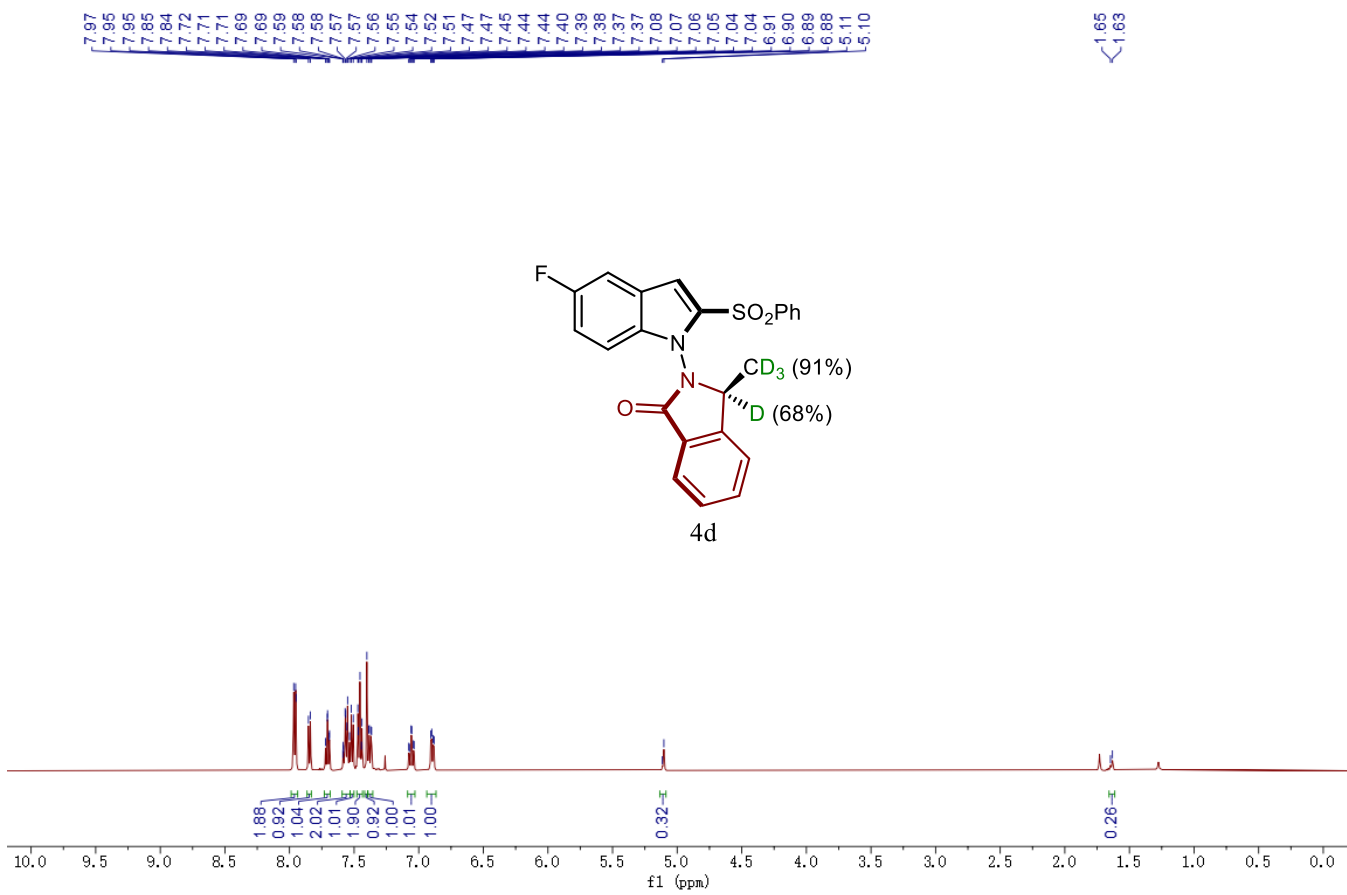

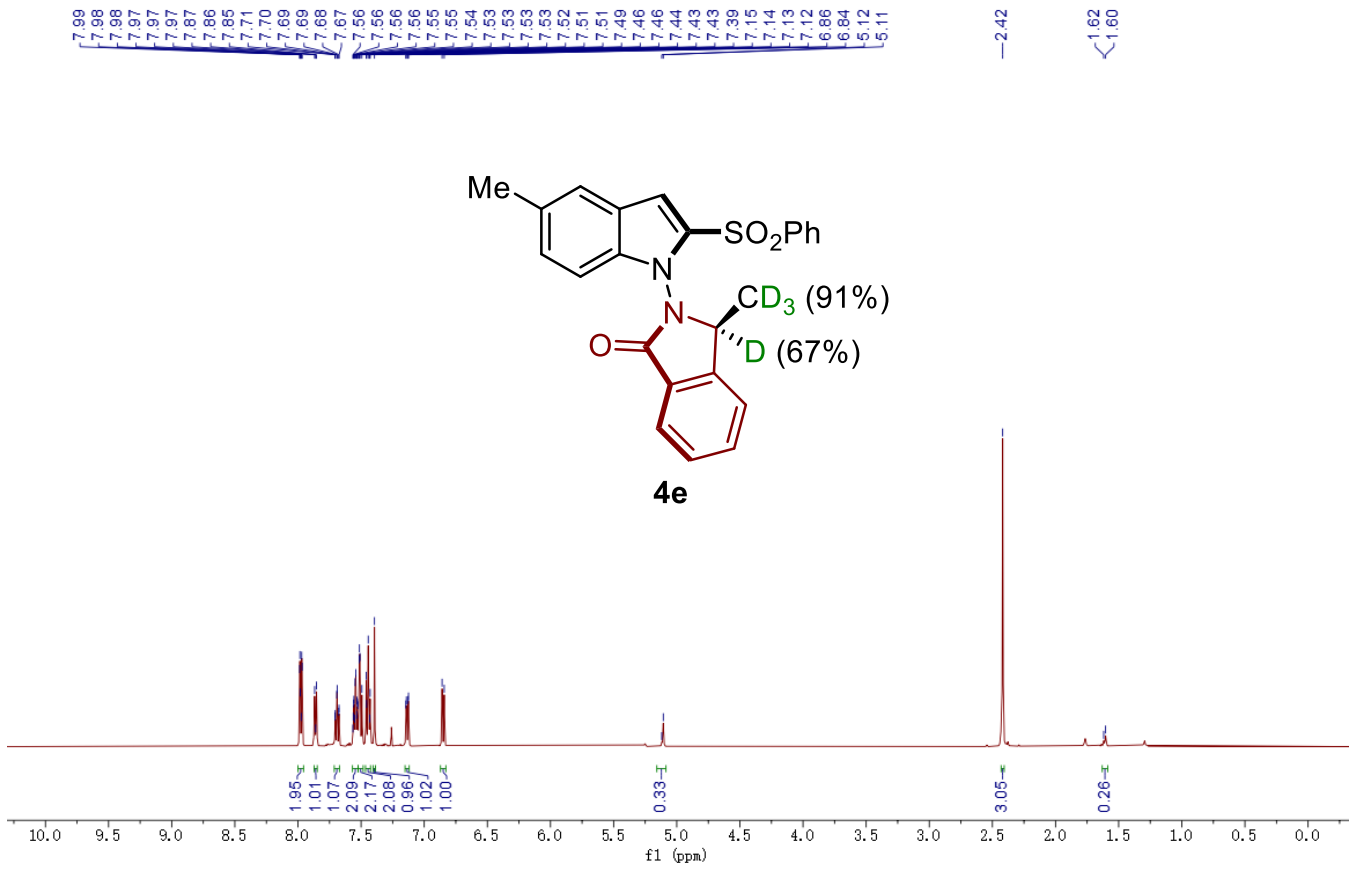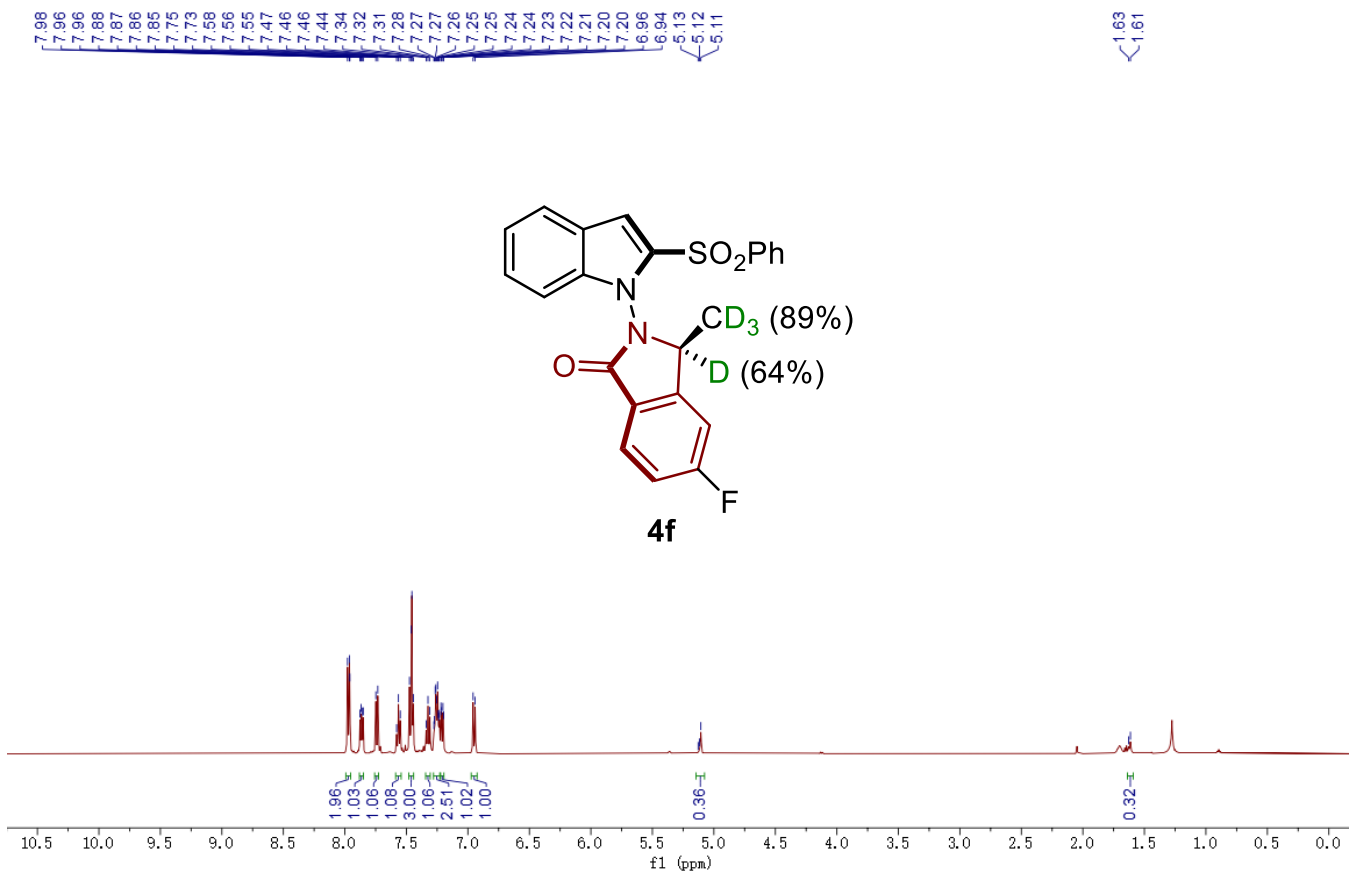

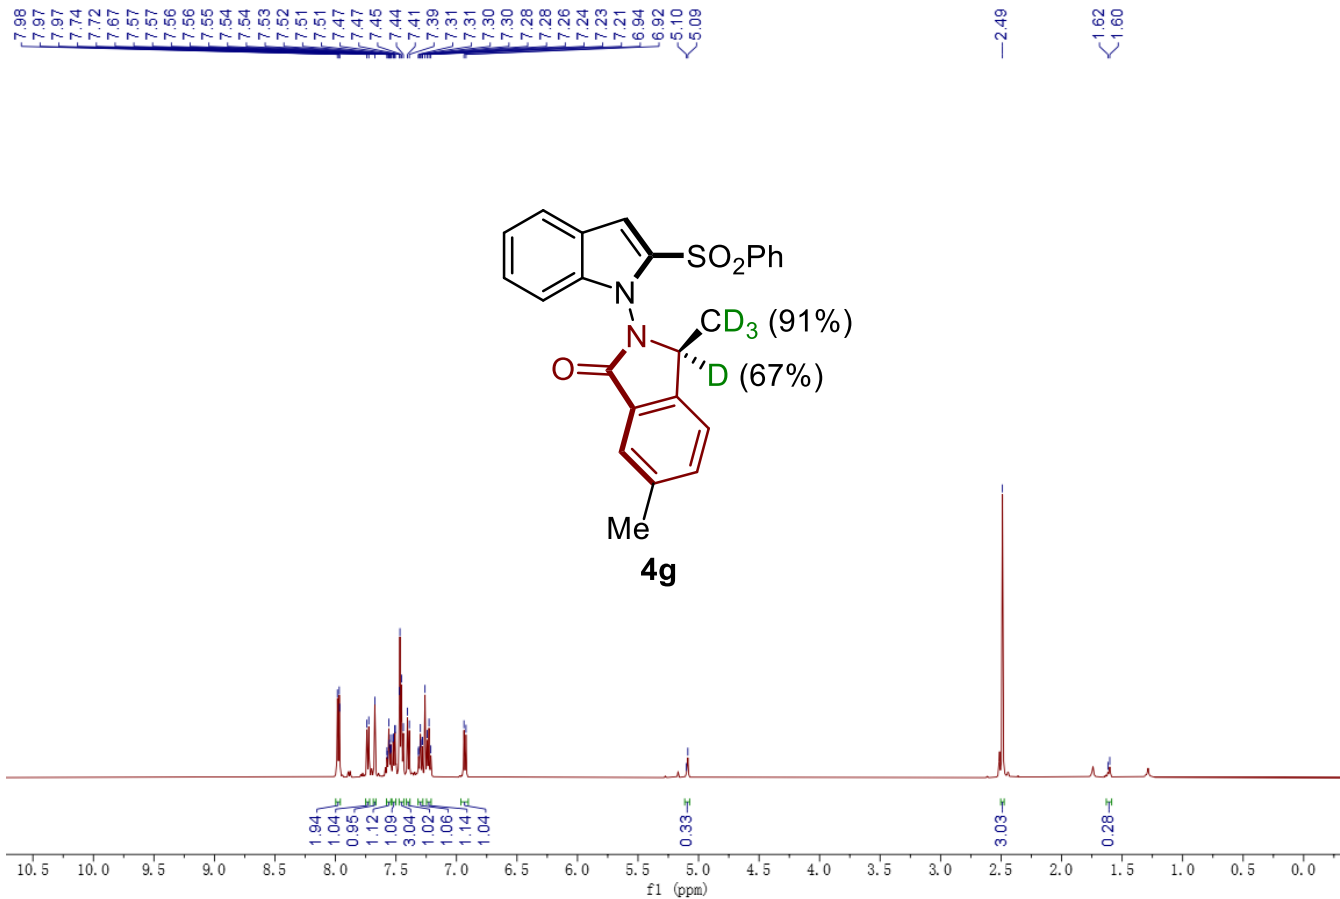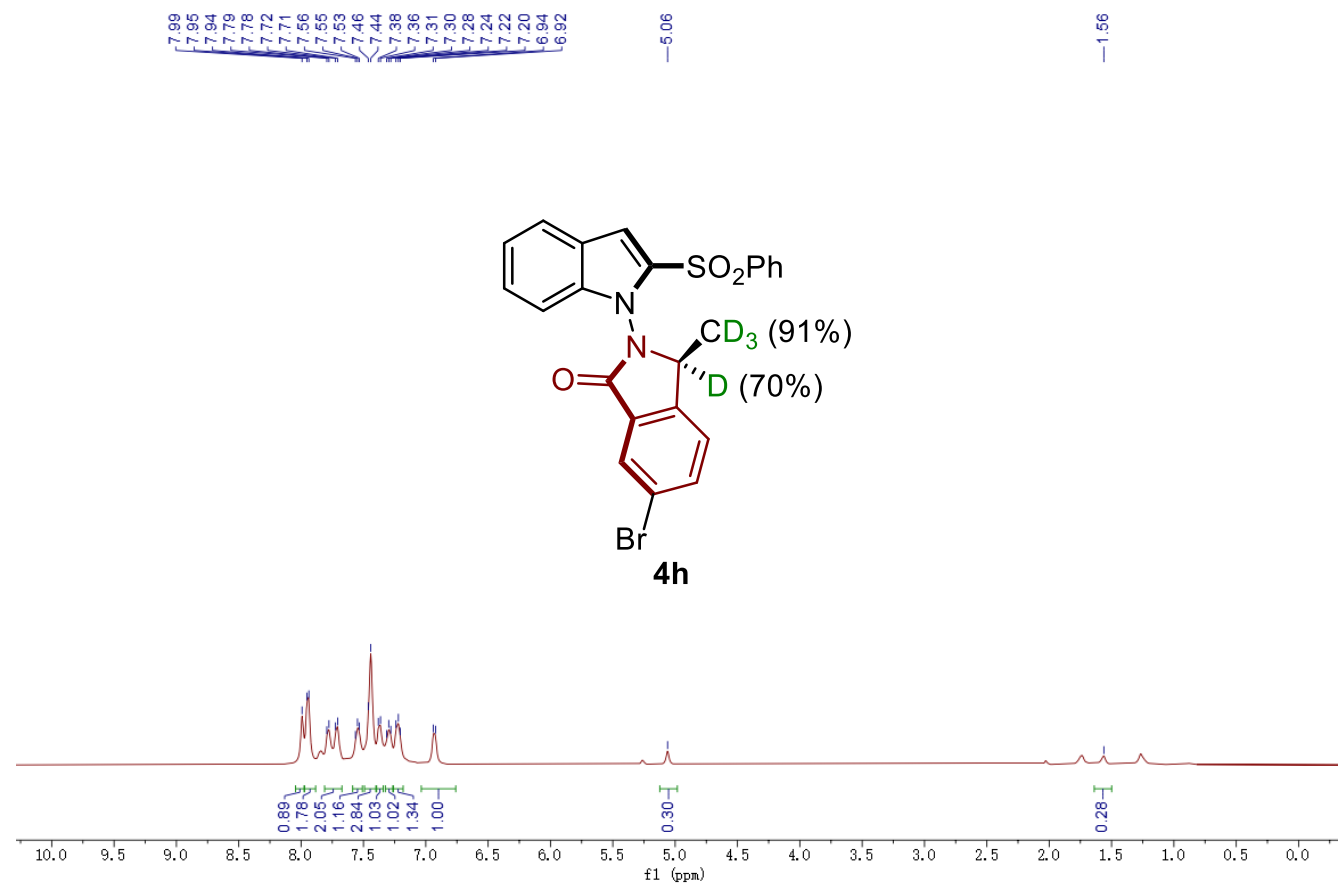

8.01, 7.99, 7.88, 7.87, 7.74, 7.73, 7.71, 7.70, 7.68, 7.67, 7.59, 7.57, 7.55, 7.54, 7.48, 7.46, 7.45, 7.33, 7.31, 7.30, 7.26, 7.24, 7.22, 6.95, 6.94, 5.08, 5.07, 5.05, 2.20, 2.19, 2.17, 2.16, 2.15, 2.14, 2.10, 2.08, 2.06, 2.05, 2.03, 1.28, 1.26, 1.25, 1.23, 1.22, 1.21, 1.19, 1.18, 1.17, 1.16, 1.14, 0.86, 0.83

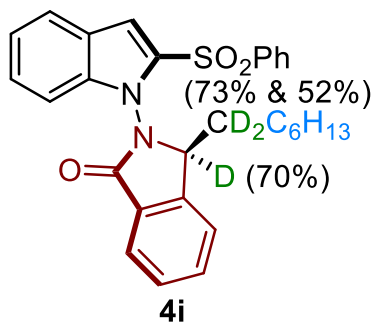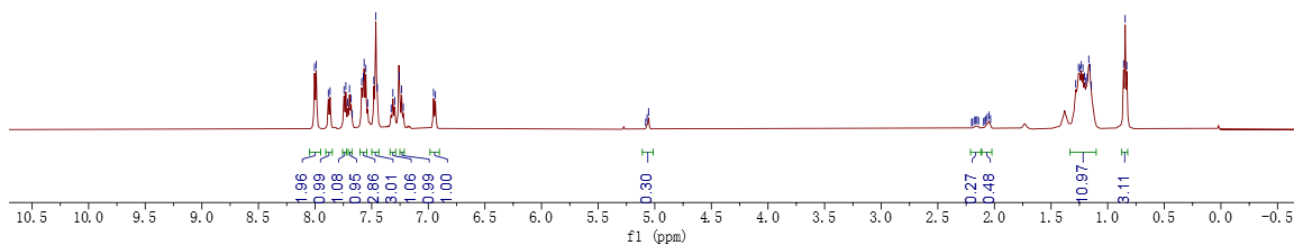

8.13, 8.11, 8.10, 8.09, 8.06, 8.03, 8.02, 7.74, 7.73, 7.72, 7.70, 7.64, 7.63, 7.62, 7.61, 7.59, 7.58, 7.56, 7.54, 7.52, 7.44, 7.42, 7.42, 7.41, 7.41, 7.41, 7.40, 7.40, 7.38, 7.36, 7.34, 7.33, 7.31, 7.31, 7.31, 7.30, 7.30, 7.29, 7.29, 7.28, 7.28, 7.27, 7.14, 7.12, 5.24, 5.22, 5.21, 5.20, 1.49, 1.48

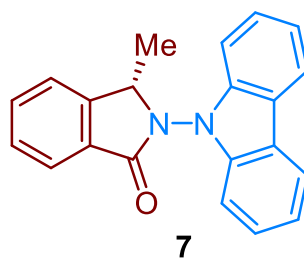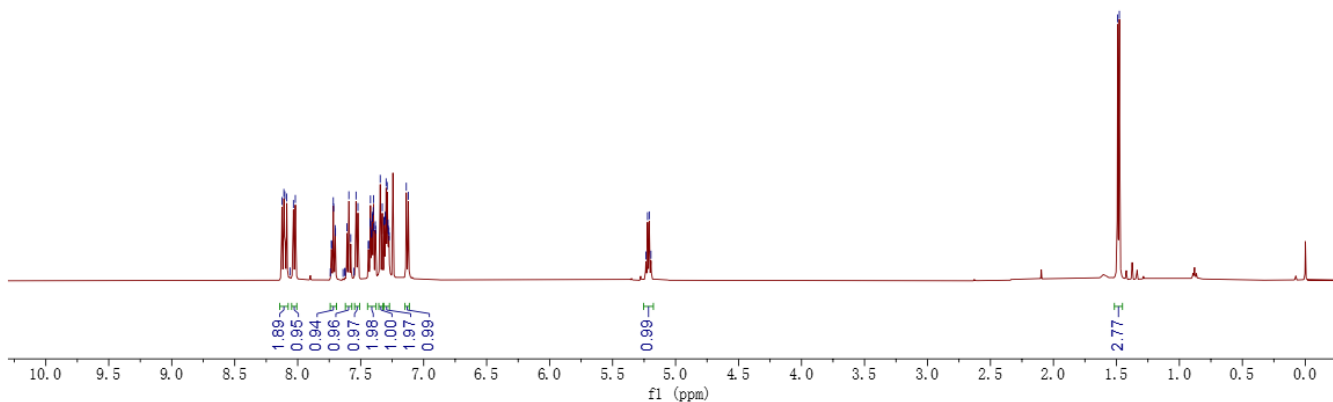

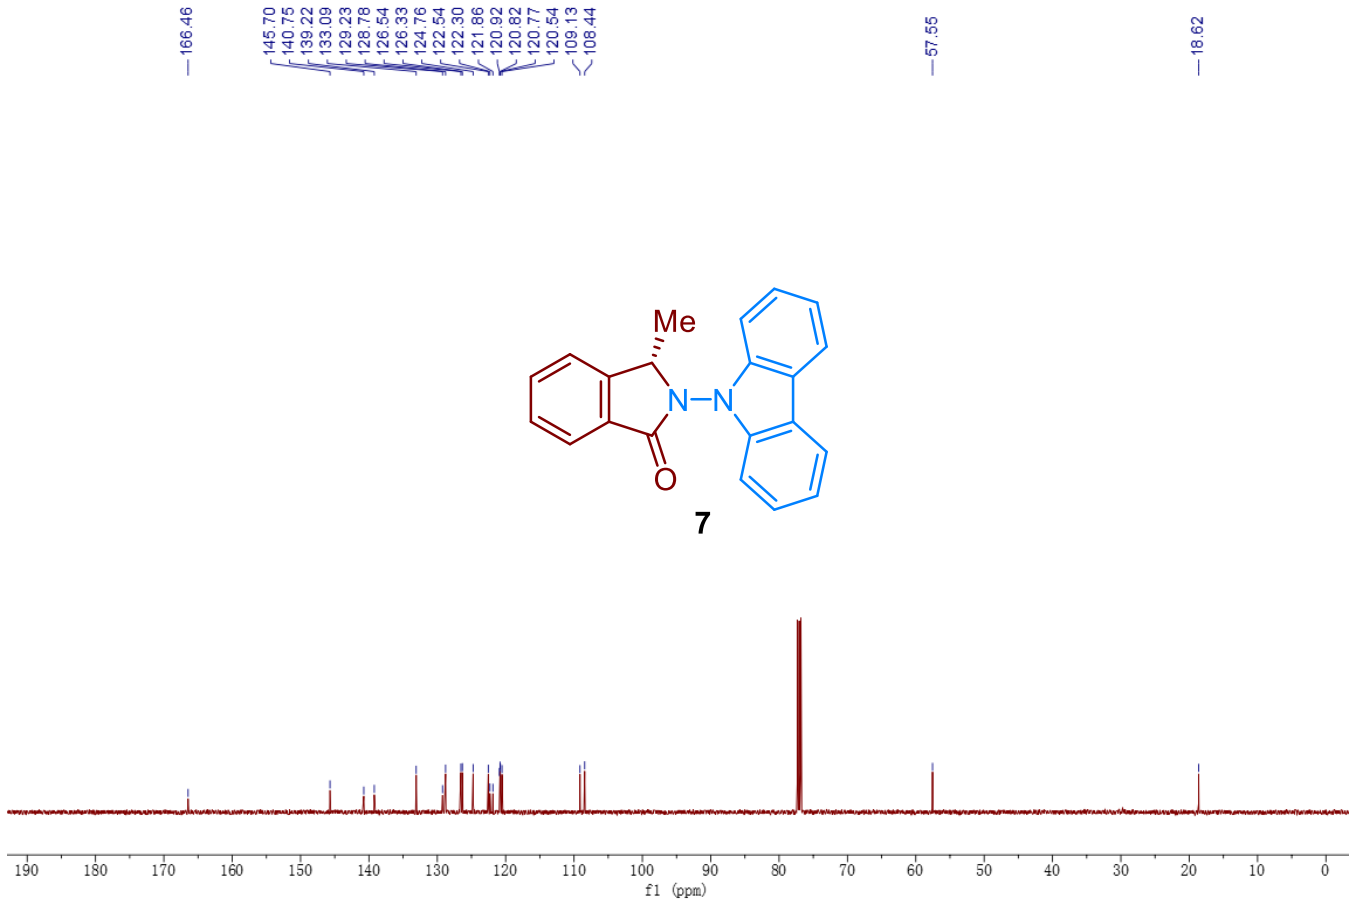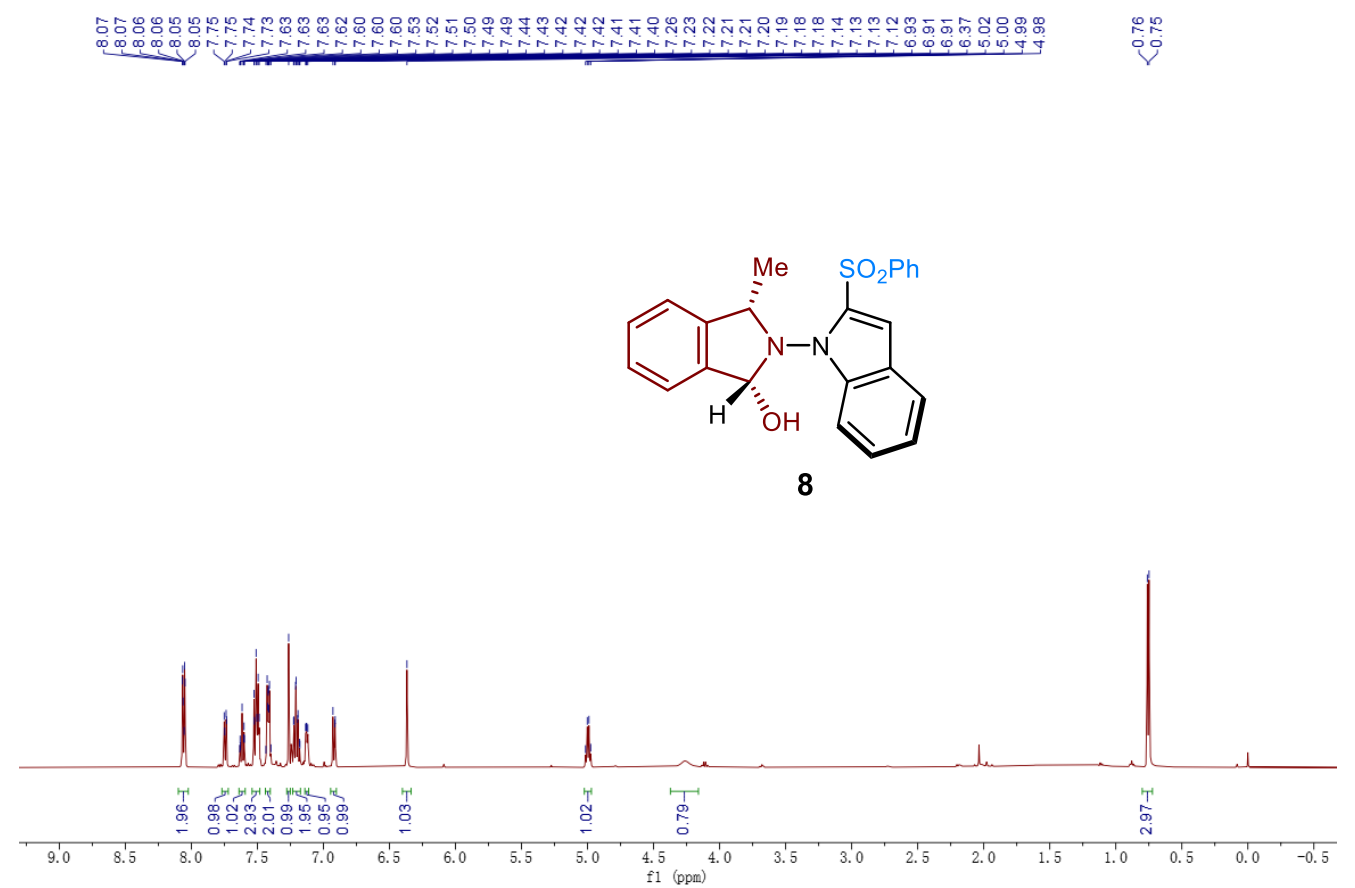

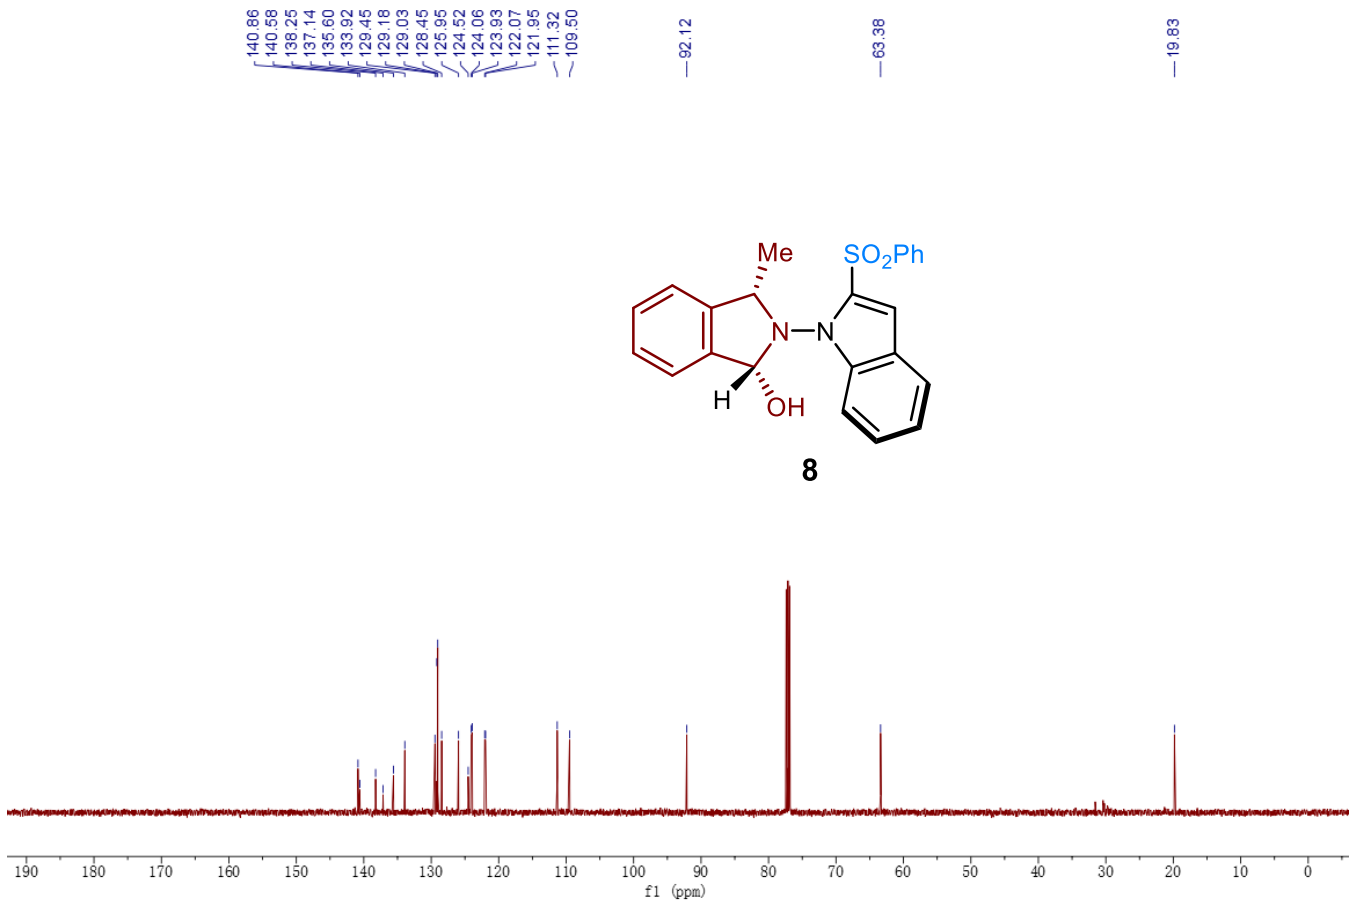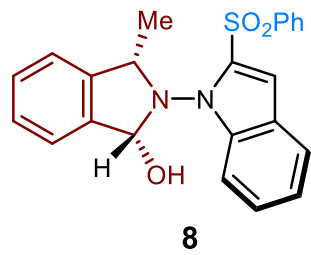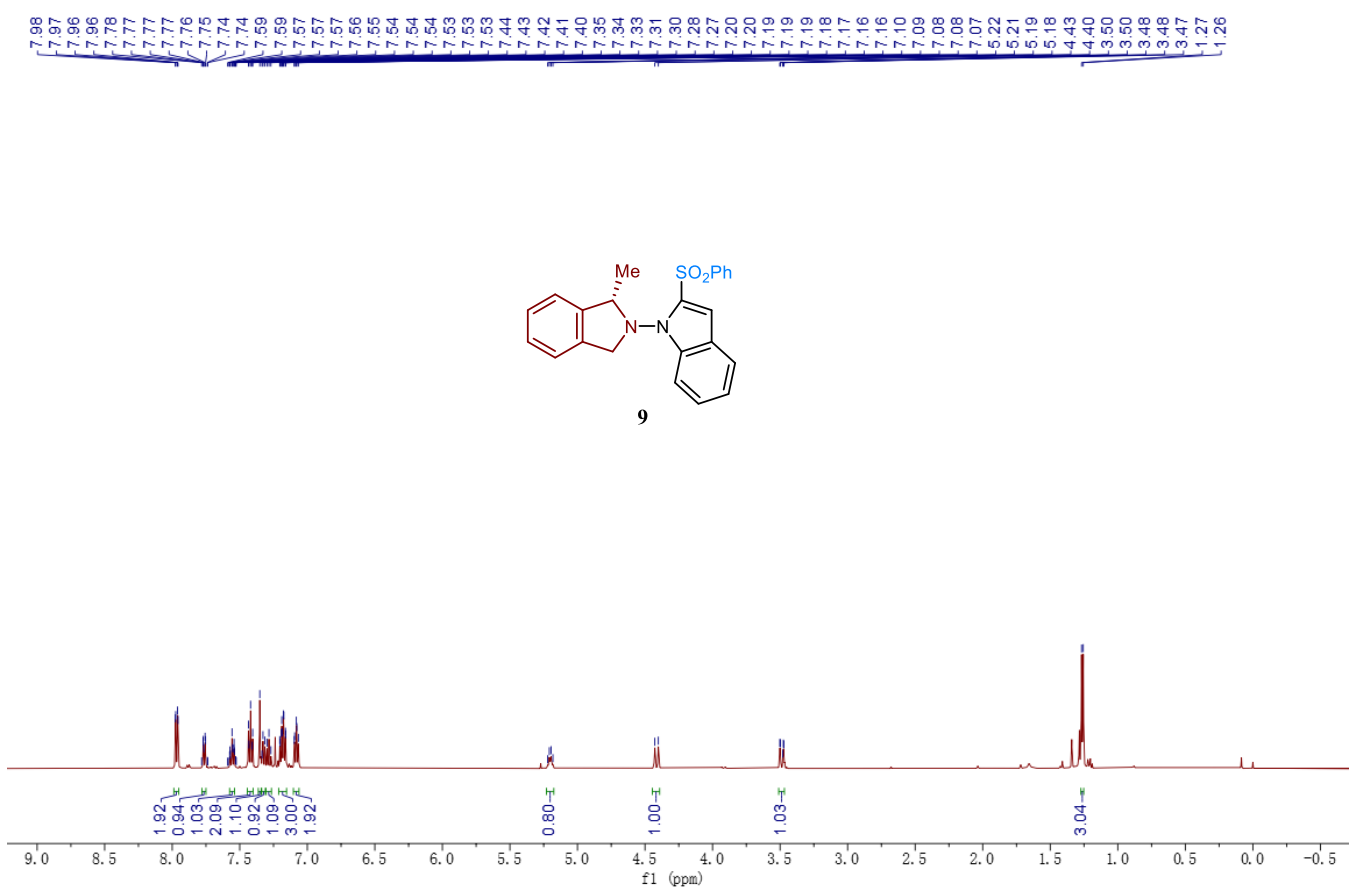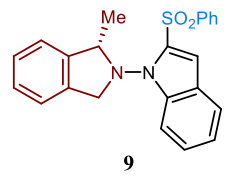

S200



141.70  
140.89  
137.66  
136.28  
134.66  
133.19  
129.07  
128.80  
127.76  
127.62  
125.13  
124.95  
124.06  
122.34  
122.30  
121.86  
107.75

64.39

57.52

19.40

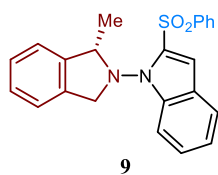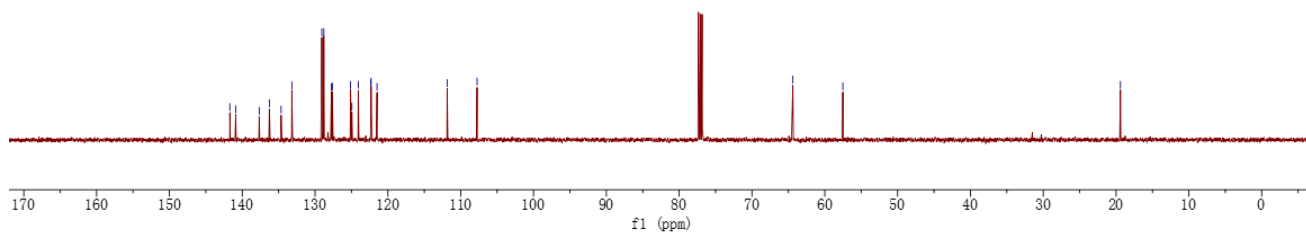

8.31  
8.31  
8.30  
8.29  
8.04  
8.03  
7.73  
7.73  
7.71  
7.71  
7.70  
7.69  
7.67  
7.61  
7.59  
7.58  
7.58  
7.54  
7.53  
7.52  
7.52  
7.51  
7.51  
7.50  
7.50  
7.43  
7.42  
7.41  
7.41  
7.41  
7.40  
7.40  
7.33  
7.31  
7.30  
7.12  
7.11  
5.13  
5.11  
5.10  
5.08

1.64  
1.63

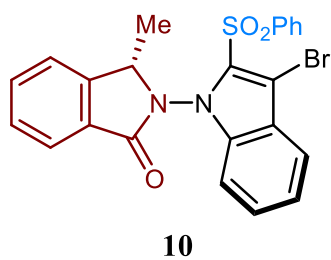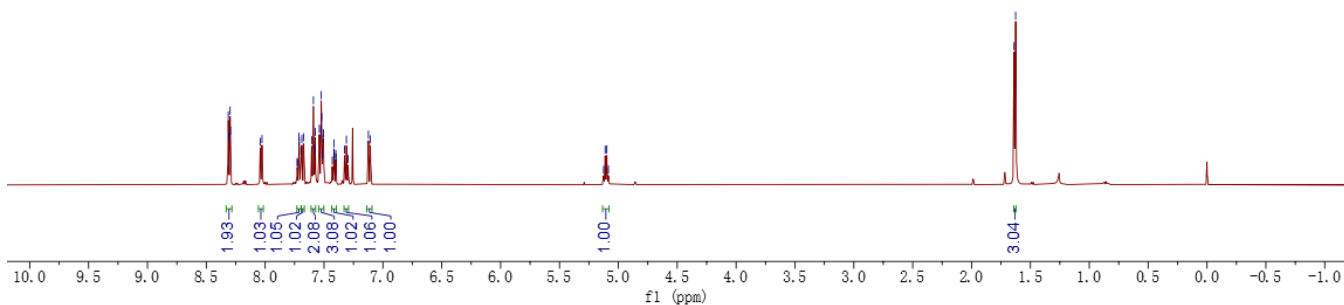

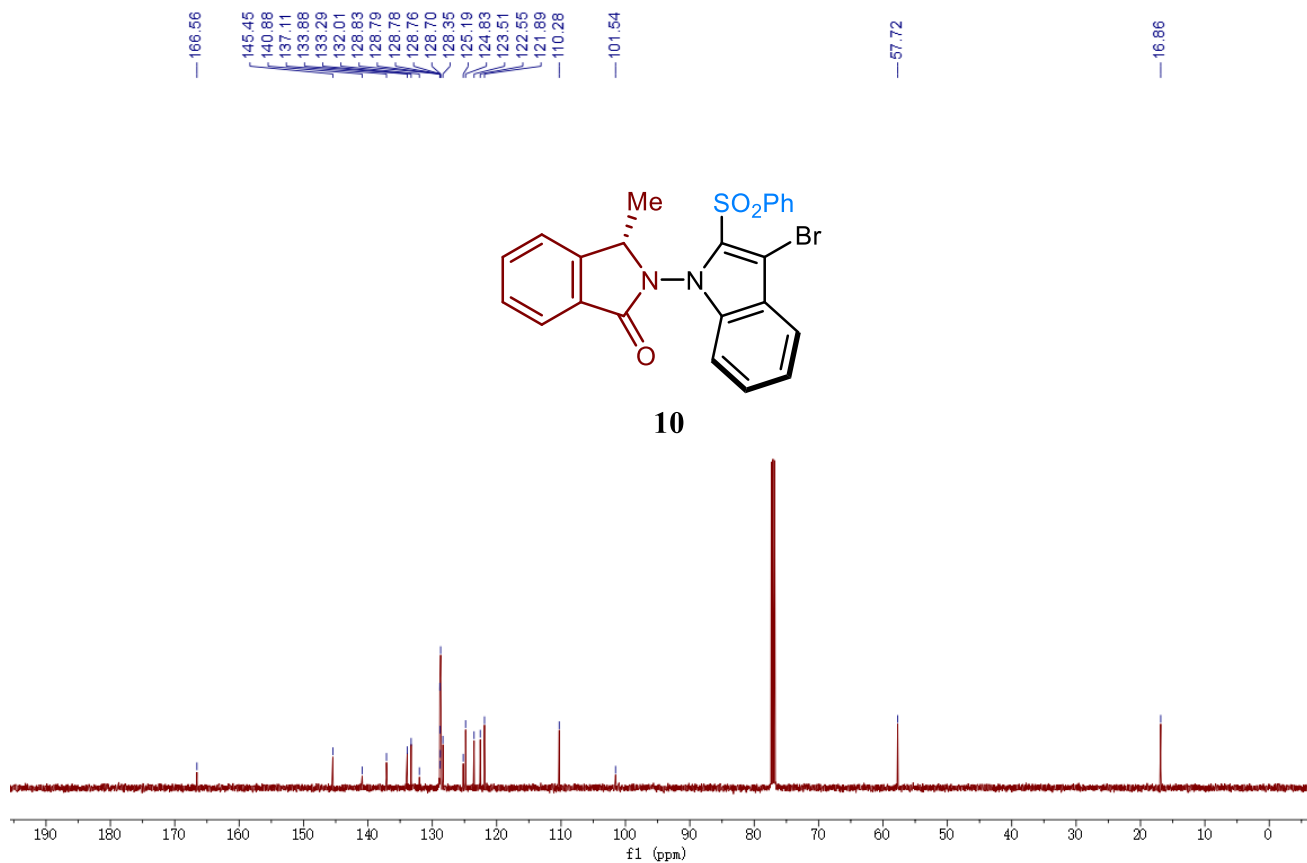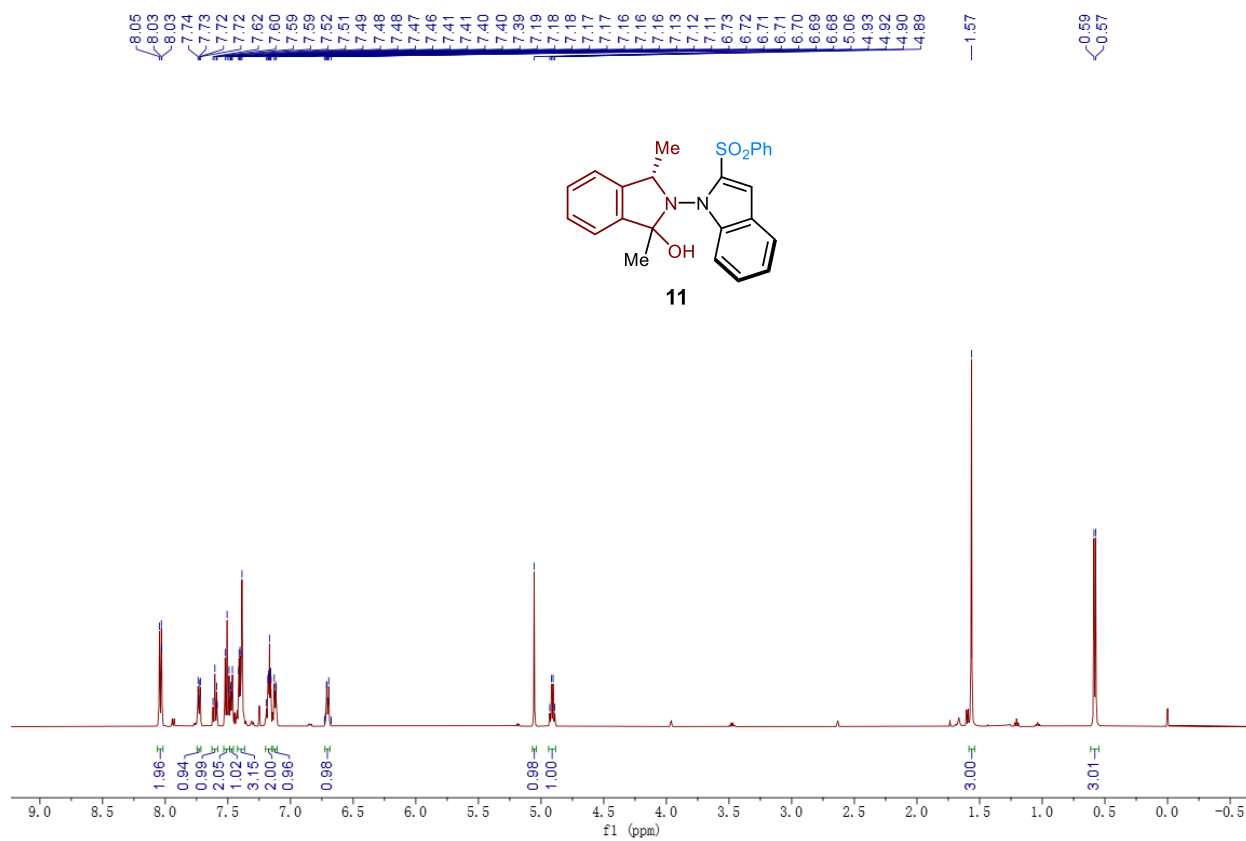

142.50  
141.32  
140.56  
137.36  
136.83  
133.79  
129.22  
129.21  
129.17  
128.81  
128.39  
126.13  
124.15  
123.87  
122.69  
121.89  
121.71  
112.35  
109.87

97.13

63.93

24.13  
21.17

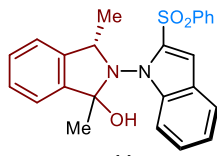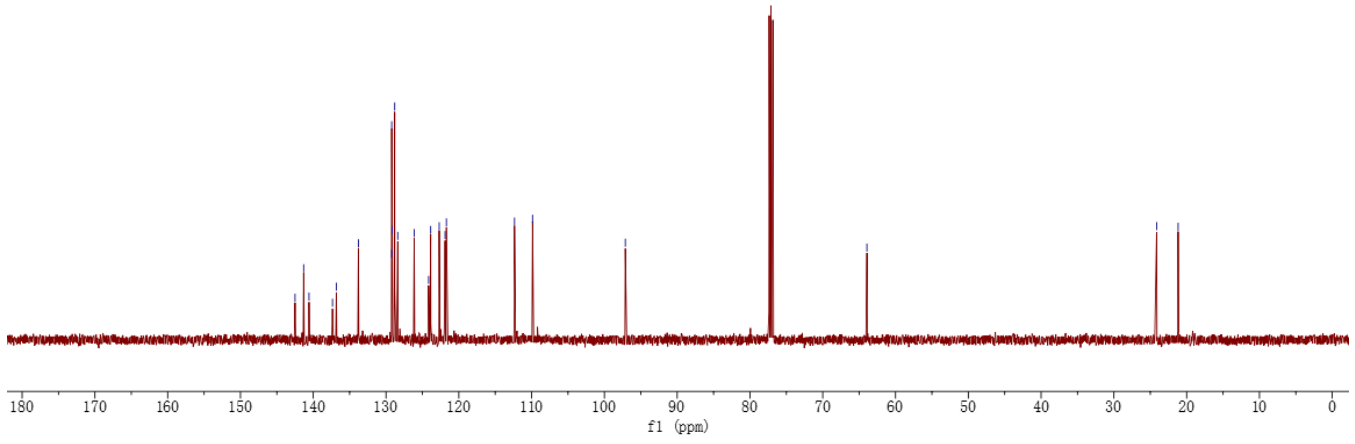

## HPLC data

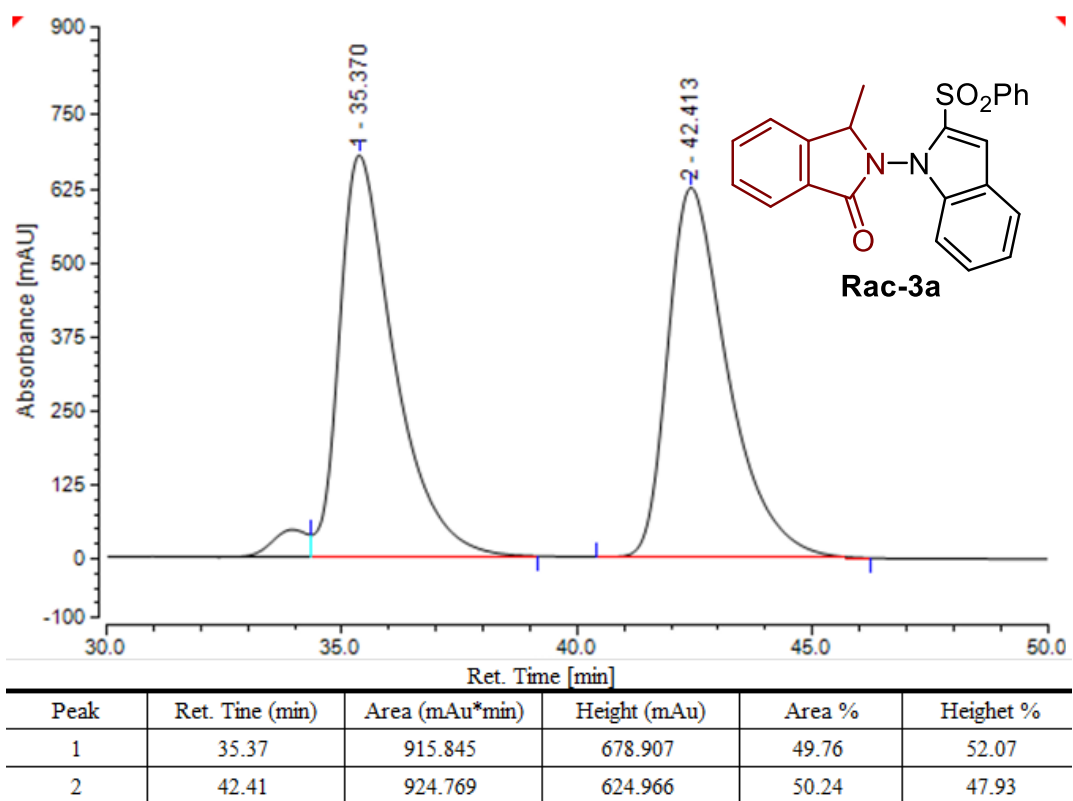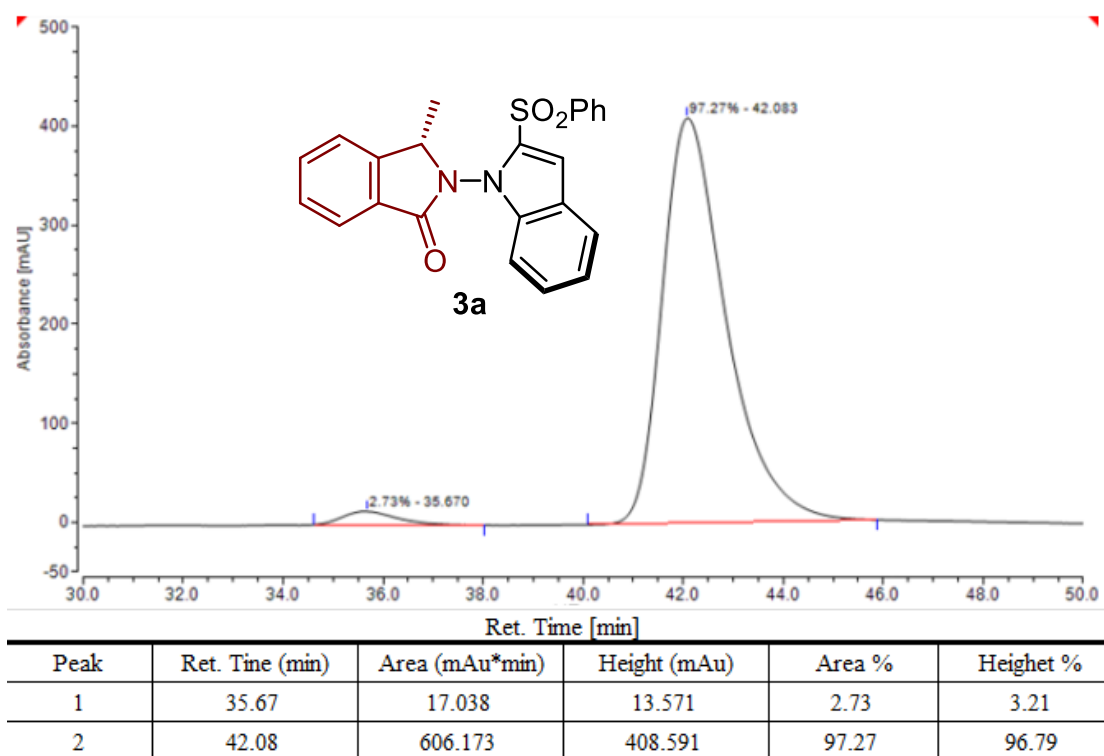

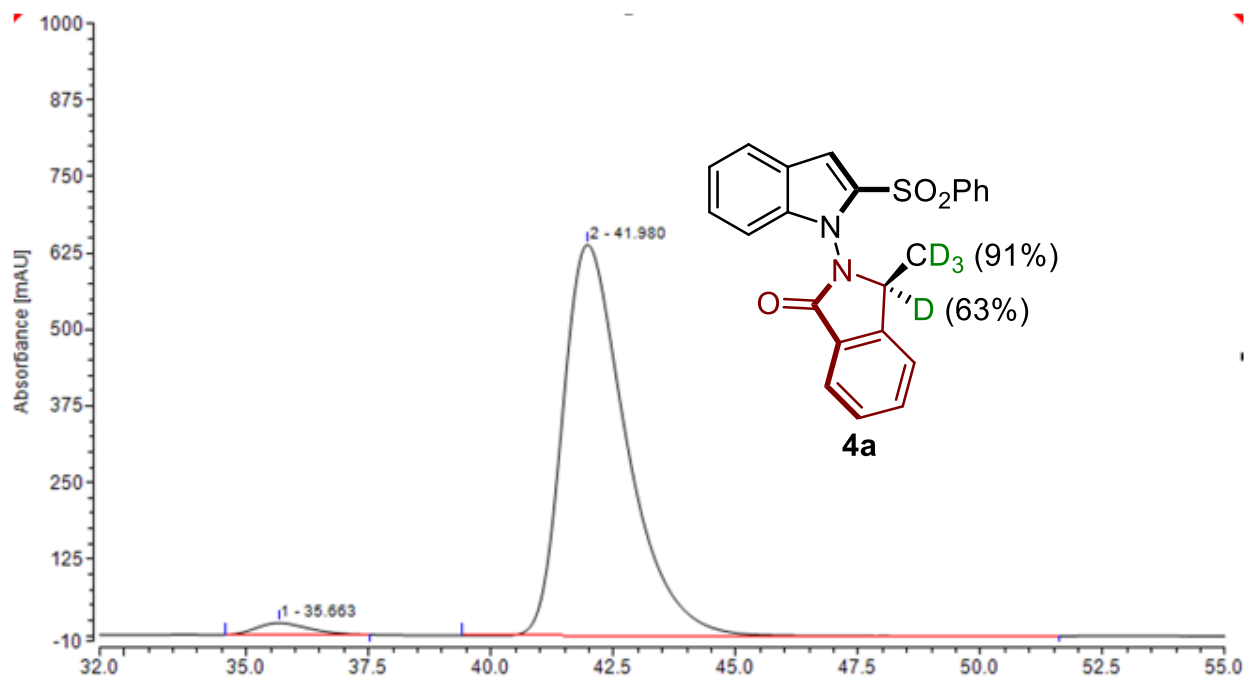

| Ret. Time [min] |                 |                |              |        |          |
|-----------------|-----------------|----------------|--------------|--------|----------|
| Peak            | Ret. Time (min) | Area (mAu*min) | Height (mAu) | Area % | Height % |
| 1               | 35.66           | 23.802         | 19.301       | 2.47   | 2.93     |
| 2               | 41.98           | 958.447        | 638.975      | 97.58  | 97.07    |

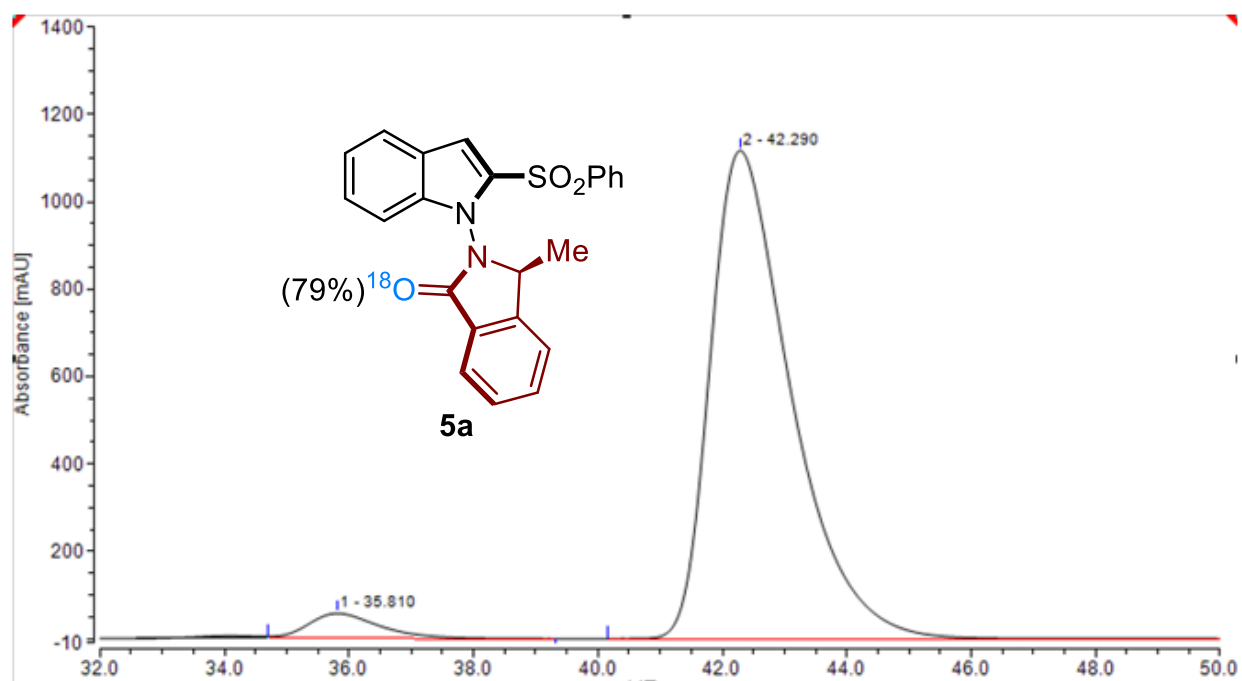

| Ret. Time [min] |                 |                |              |        |          |
|-----------------|-----------------|----------------|--------------|--------|----------|
| Peak            | Ret. Time (min) | Area (mAu*min) | Height (mAu) | Area % | Height % |
| 1               | 35.81           | 77.528         | 57.589       | 4.42   | 4.90     |
| 2               | 42.29           | 1677.914       | 1117.331     | 95.58  | 95.10    |

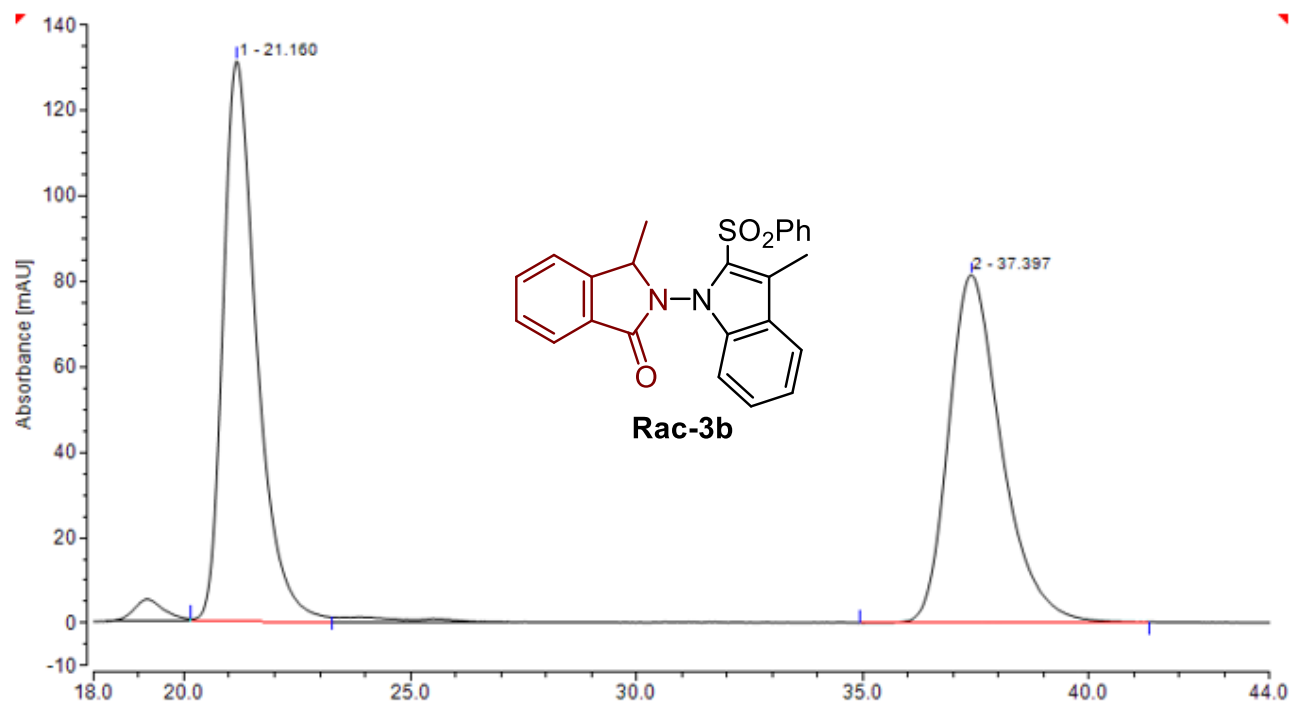

| Peak | Ret. Time (min) | Area (mAu*min) | Height (mAu) | Area % | Height % |
|------|-----------------|----------------|--------------|--------|----------|
| 1    | 21.16           | 113.362        | 131.266      | 50.80  | 61.75    |
| 2    | 37.40           | 109.770        | 81.327       | 49.20  | 38.25    |

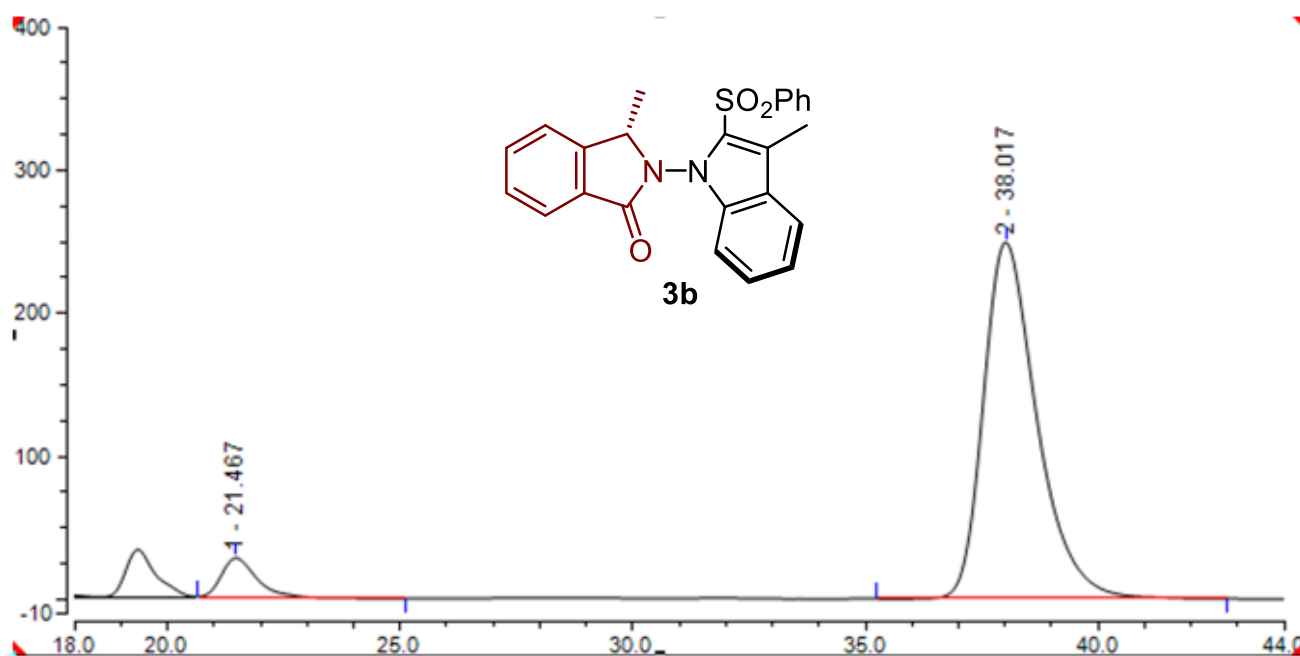

| Peak | Ret. Time (min) | Area (mAu*min) | Height (mAu) | Area % | Height % |
|------|-----------------|----------------|--------------|--------|----------|
| 1    | 21.47           | 25.606         | 28.210       | 7.16   | 10.17    |
| 2    | 38.02           | 332.140        | 249.201      | 92.84  | 89.83    |

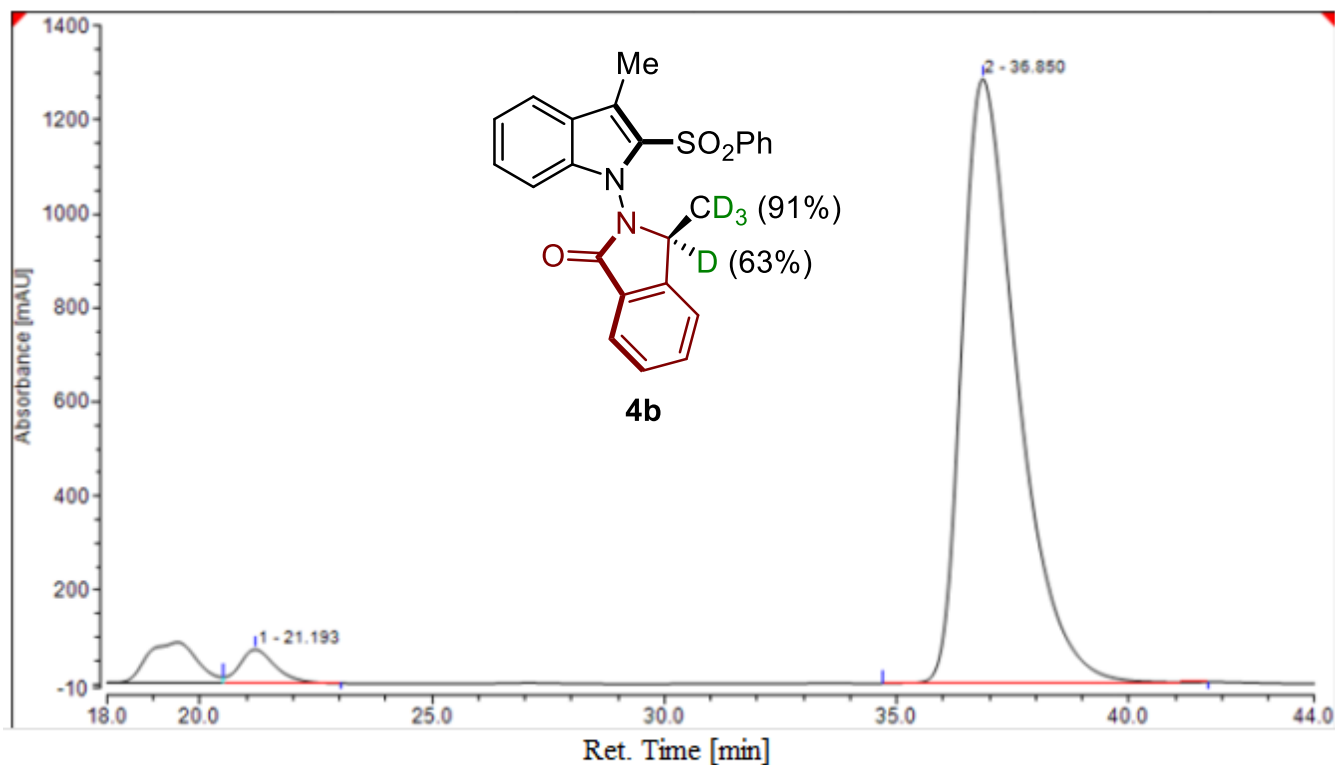

| Peak | Ret. Time (min) | Area (mAu*min) | Height (mAu) | Area % | Height % |
|------|-----------------|----------------|--------------|--------|----------|
| 1    | 21.19           | 64.358         | 72.033       | 3.50   | 5.31     |
| 2    | 36.85           | 1773.571       | 1284.940     | 96.50  | 94.69    |

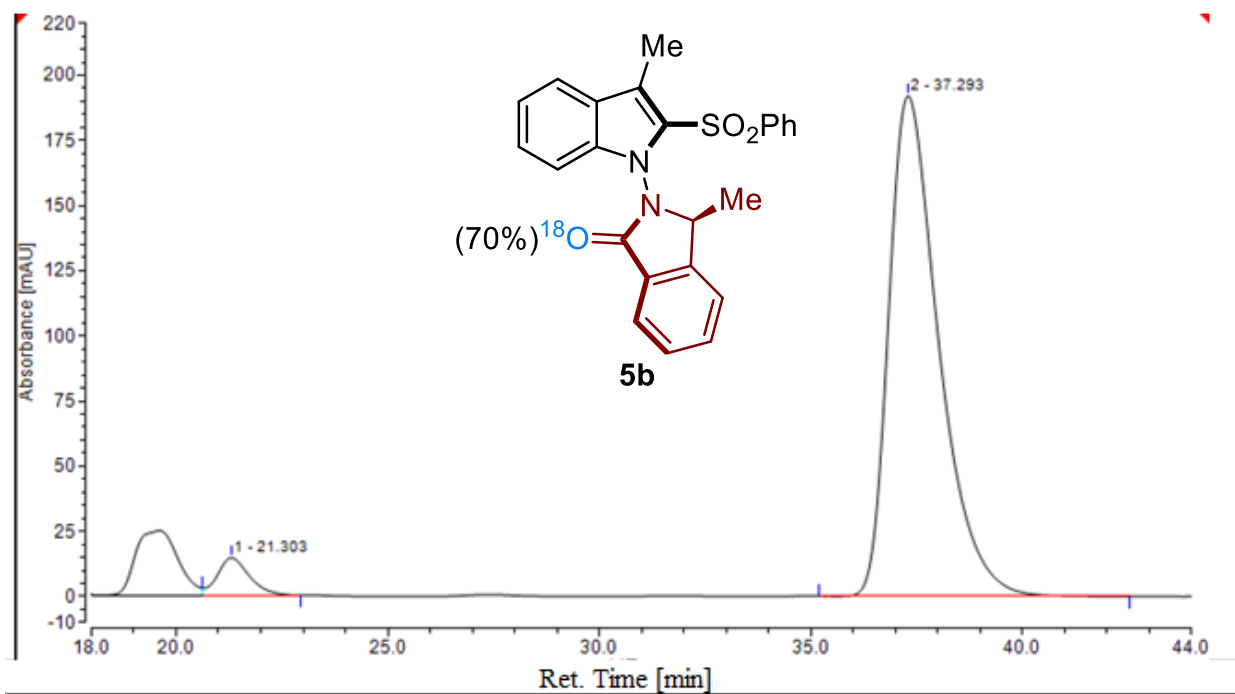

| Peak | Ret. Time (min) | Area (mAu*min) | Height (mAu) | Area % | Height % |
|------|-----------------|----------------|--------------|--------|----------|
| 1    | 21.30           | 12.495         | 14.383       | 4.56   | 6.97     |
| 2    | 37.29           | 261.777        | 192.045      | 95.44  | 93.03    |

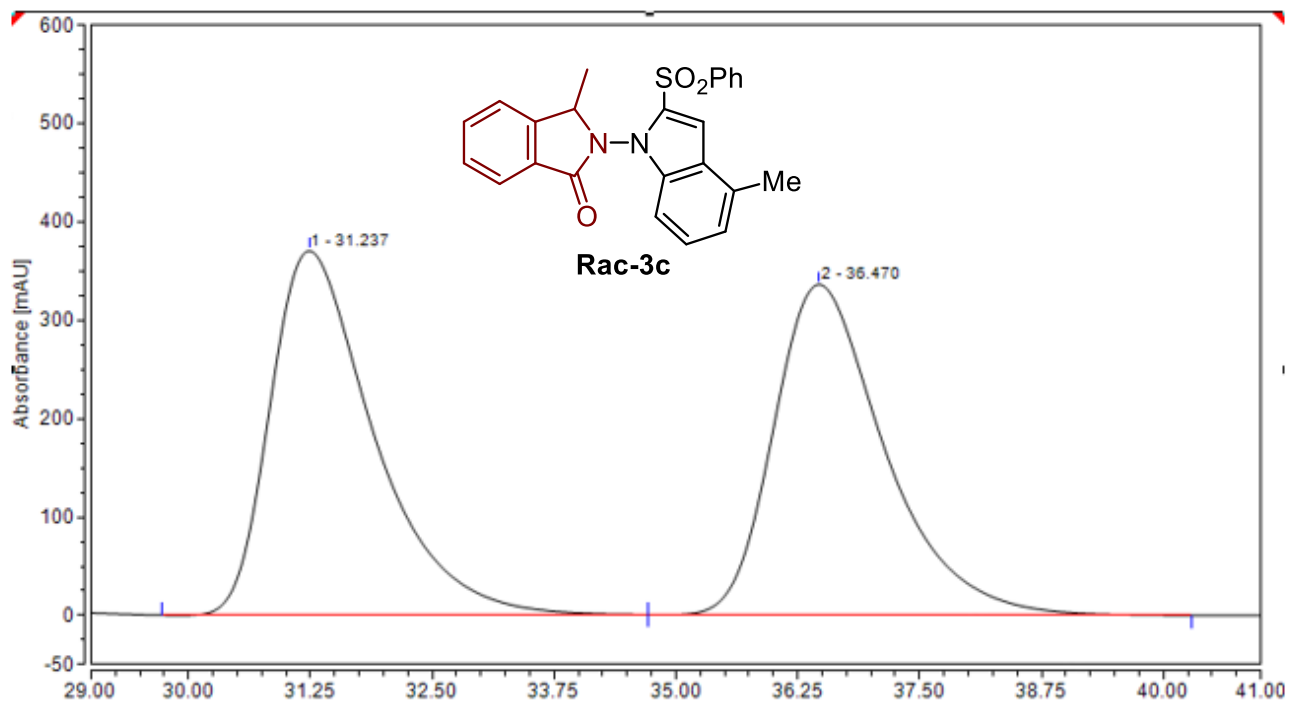

| Peak | Ret. Time (min) | Area (mAu*min) | Height (mAu) | Area % | Height % |
|------|-----------------|----------------|--------------|--------|----------|
| 1    | 31.24           | 457.811        | 370.131      | 50.66  | 52.41    |
| 2    | 36.47           | 445.936        | 336.025      | 49.34  | 47.59    |

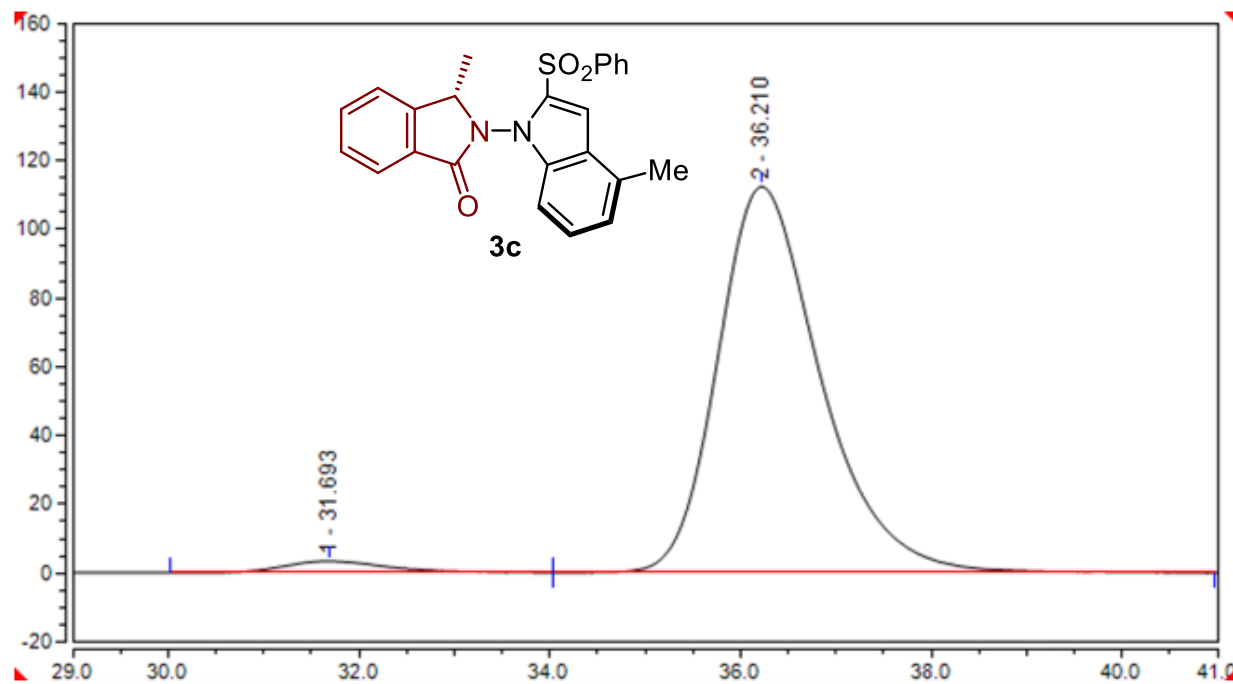

| Peak | Ret. Time (min) | Area (mAu*min) | Height (mAu) | Area % | Height % |
|------|-----------------|----------------|--------------|--------|----------|
| 1    | 31.69           | 4.265          | 3.381        | 2.94   | 2.92     |
| 2    | 36.21           | 140.892        | 112.285      | 97.06  | 97.08    |



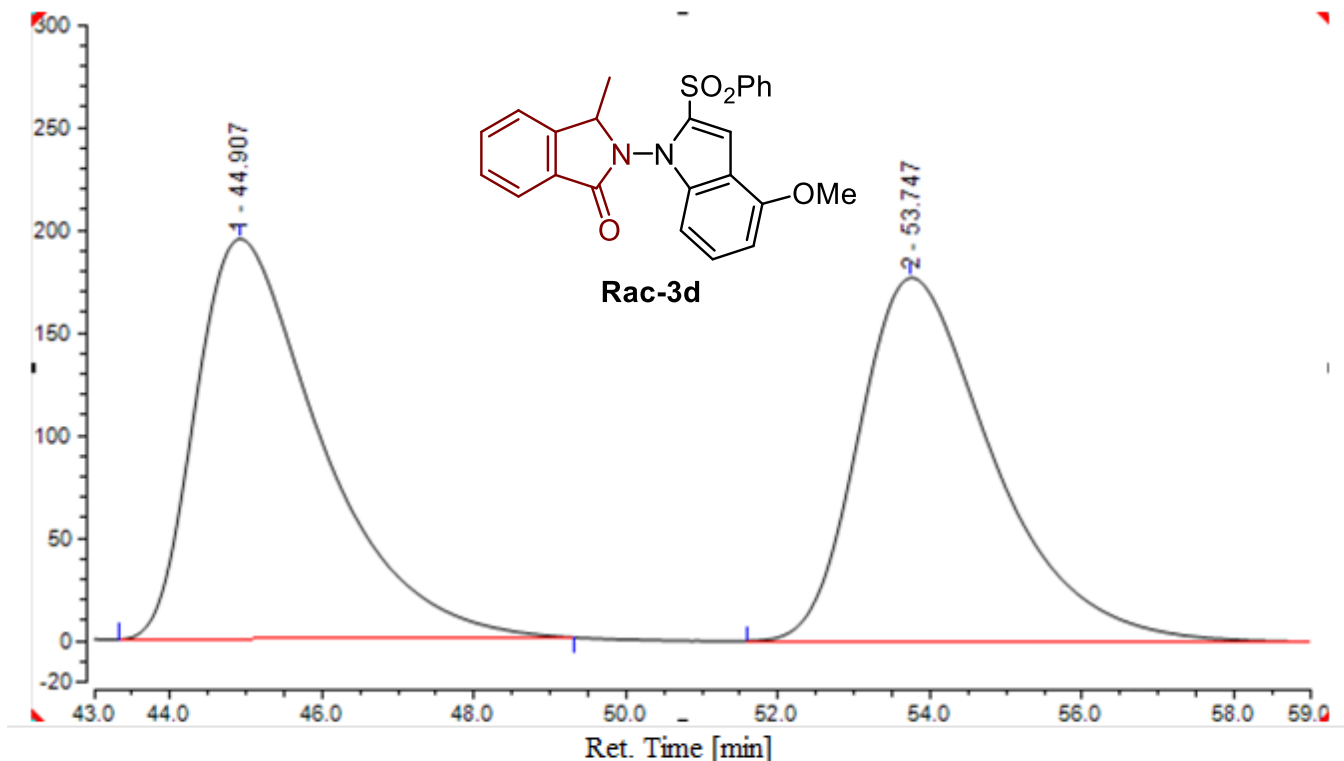

| Peak | Ret. Time (min) | Area (mAu*min) | Height (mAu) | Area % | Height % |
|------|-----------------|----------------|--------------|--------|----------|
| 1    | 44.91           | 372.195        | 194.768      | 50.55  | 52.37    |
| 2    | 53.75           | 364.089        | 177.116      | 49.45  | 47.63    |

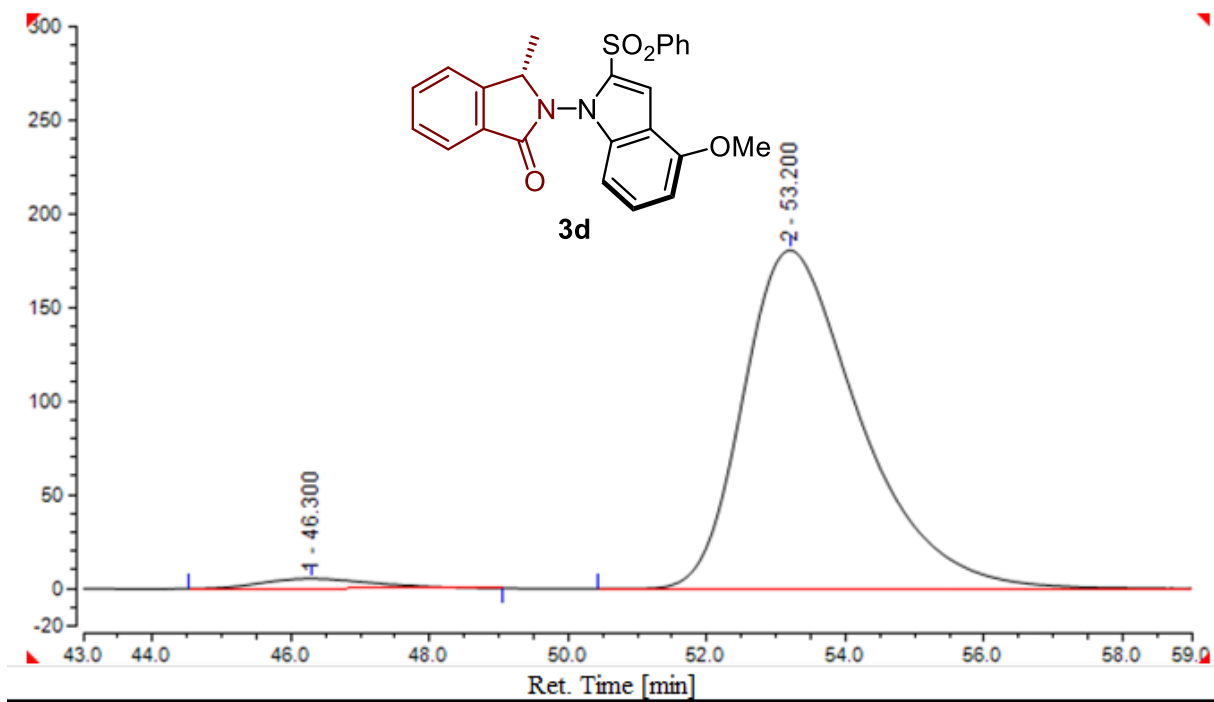

| Peak | Ret. Time (min) | Area (mAu*min) | Height (mAu) | Area % | Height % |
|------|-----------------|----------------|--------------|--------|----------|
| 1    | 46.30           | 10.038         | 5.307        | 2.77   | 2.86     |
| 2    | 53.20           | 351.799        | 180.498      | 97.23  | 97.14    |

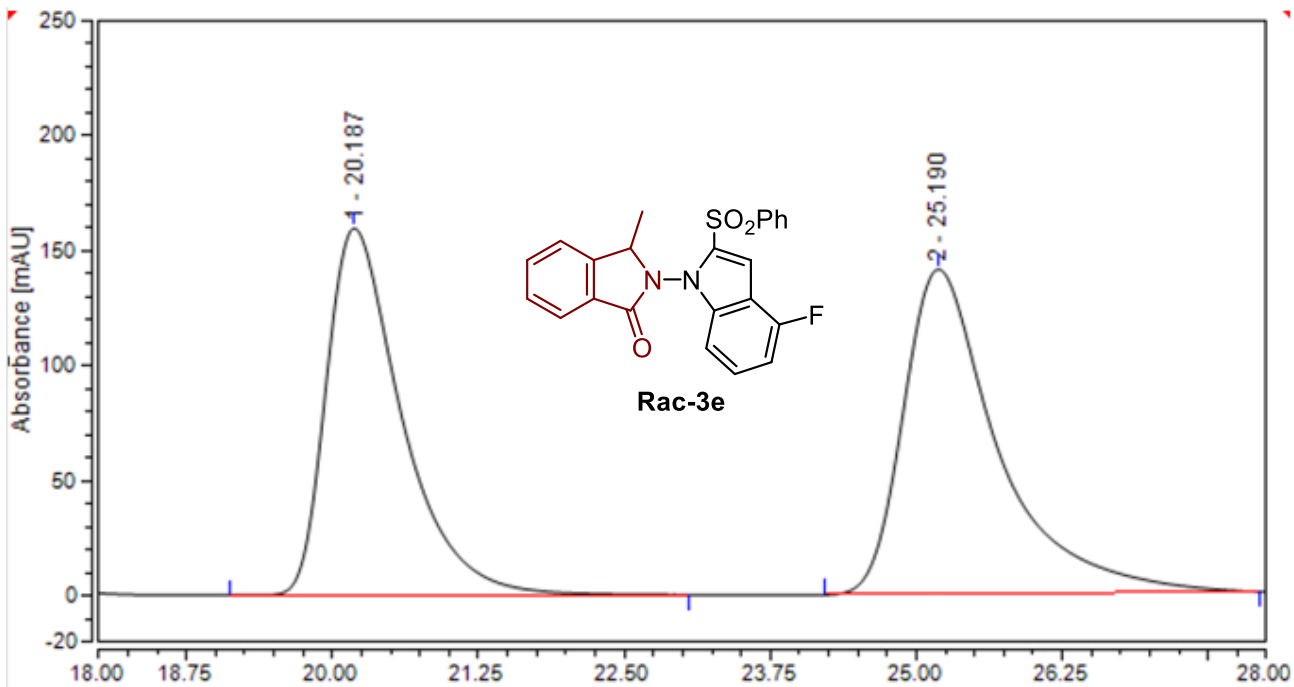

| Ret. Time [min] |                 |                |              |        |          |
|-----------------|-----------------|----------------|--------------|--------|----------|
| Peak            | Ret. Time (min) | Area (mAu*min) | Height (mAu) | Area % | Height % |
| 1               | 20.19           | 118.600        | 159.153      | 47.25  | 53.04    |
| 2               | 25.19           | 132.398        | 140.905      | 52.75  | 46.96    |

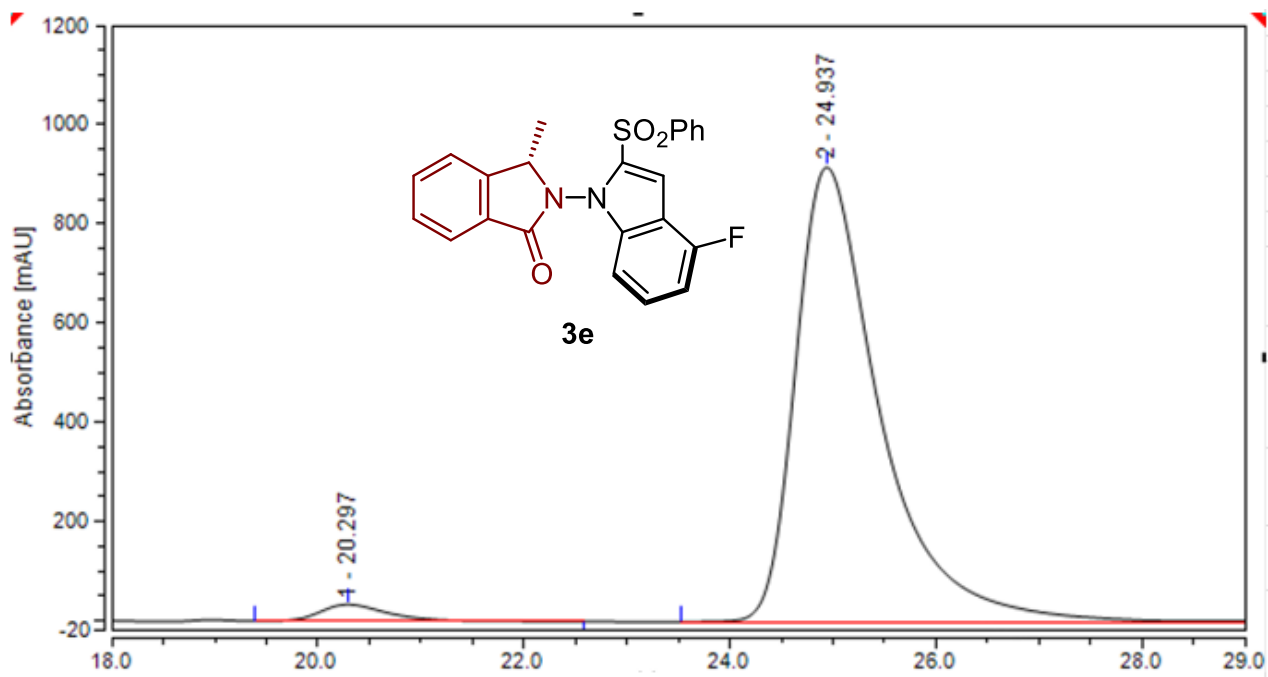

| Ret. Time [min] |                 |                |              |        |          |
|-----------------|-----------------|----------------|--------------|--------|----------|
| Peak            | Ret. Time (min) | Area (mAu*min) | Height (mAu) | Area % | Height % |
| 1               | 20.30           | 26.275         | 33.712       | 2.93   | 3.55     |
| 2               | 24.94           | 870.214        | 916.240      | 97.07  | 96.45    |

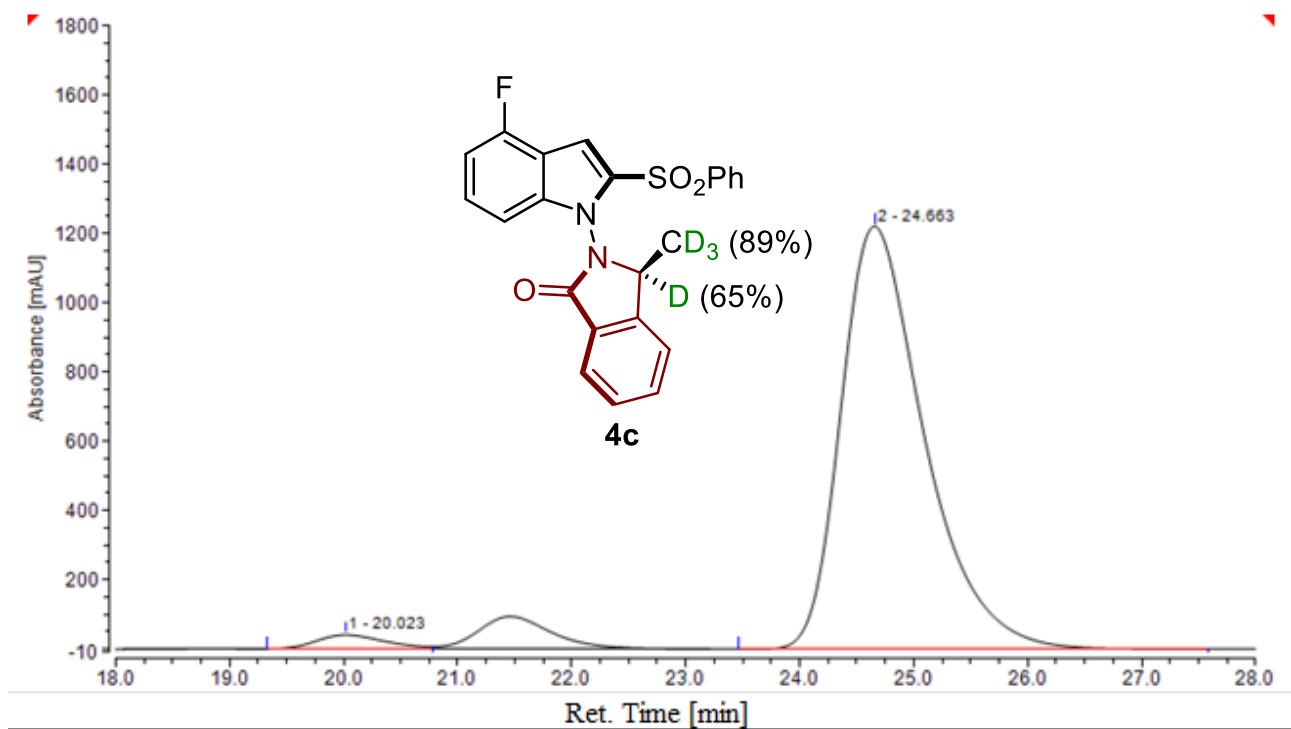

| Peak | Ret. Time (min) | Area (mAu*min) | Height (mAu) | Area % | Height % |
|------|-----------------|----------------|--------------|--------|----------|
| 1    | 20.02           | 29.236         | 41.026       | 2.75   | 3.25     |
| 2    | 24.66           | 1033.255       | 1221.021     | 97.25  | 96.75    |

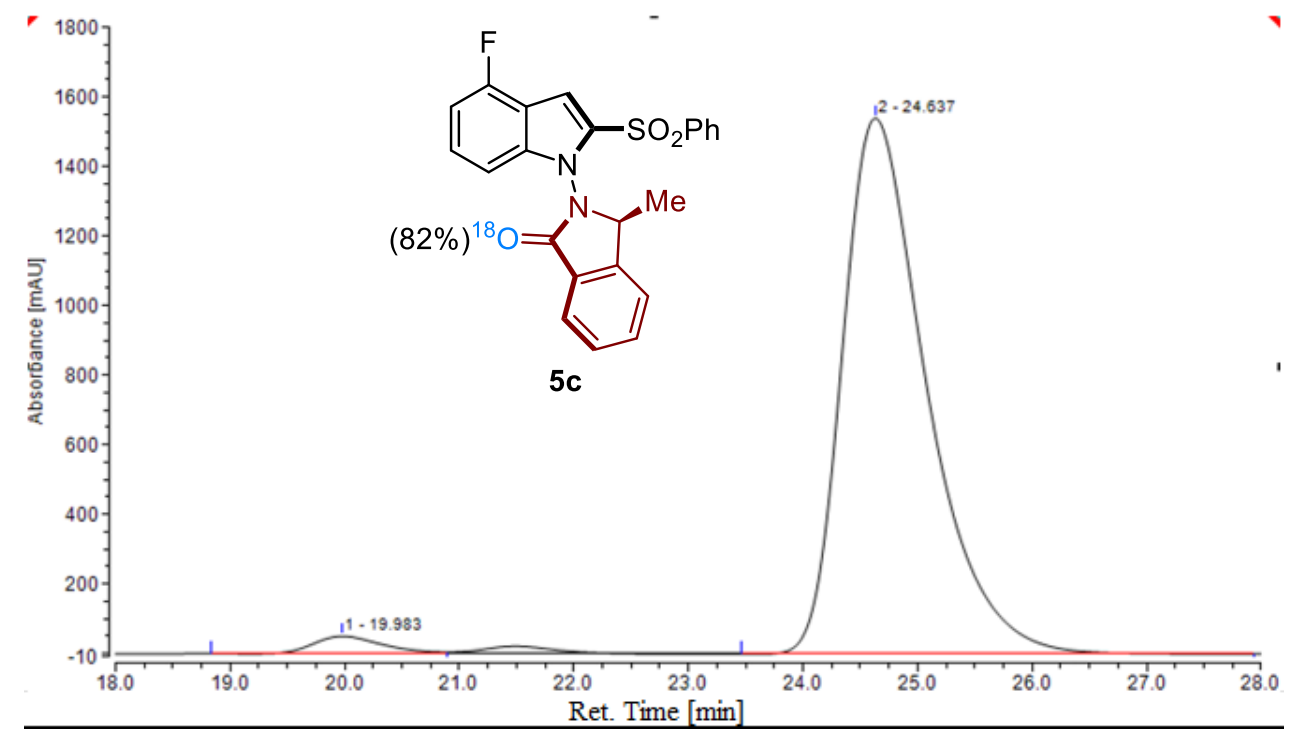

| Peak | Ret. Time (min) | Area (mAu*min) | Height (mAu) | Area % | Height % |
|------|-----------------|----------------|--------------|--------|----------|
| 1    | 19.98           | 35.520         | 50.033       | 2.65   | 3.14     |
| 2    | 24.64           | 1302.971       | 1541.225     | 97.35  | 96.86    |

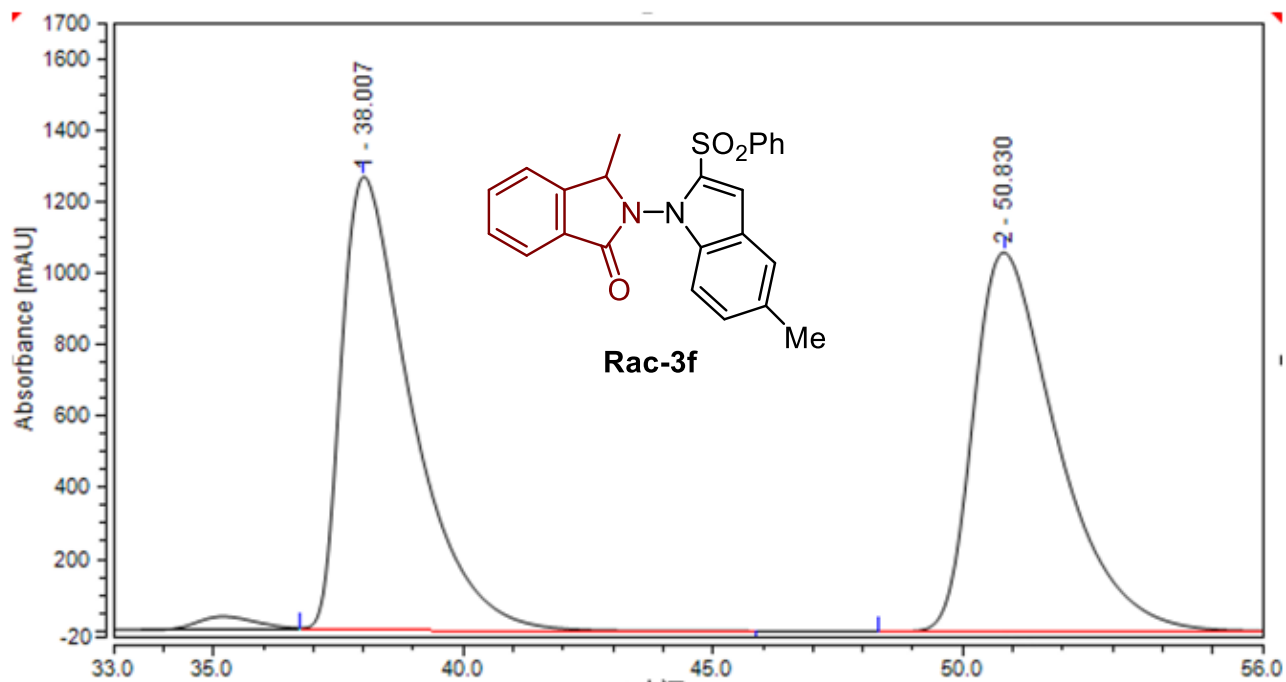

| Ret. Time [min] |                 |                |              |        |          |
|-----------------|-----------------|----------------|--------------|--------|----------|
| Peak            | Ret. Time (min) | Area (mAu*min) | Height (mAu) | Area % | Height % |
| 1               | 38.01           | 2061.876       | 1269.205     | 49.93  | 54.48    |
| 2               | 50.83           | 2067.656       | 1060.375     | 50.07  | 45.52    |

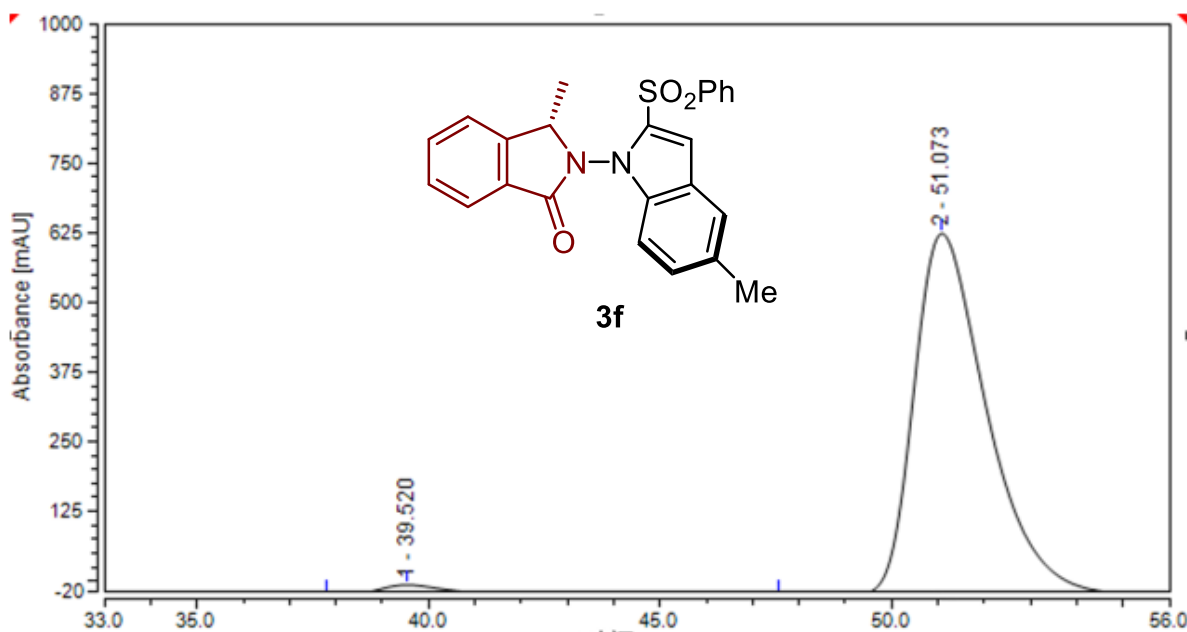

| Ret. Time [min] |                 |                |              |        |          |
|-----------------|-----------------|----------------|--------------|--------|----------|
| Peak            | Ret. Time (min) | Area (mAu*min) | Height (mAu) | Area % | Height % |
| 1               | 39.52           | 28.402         | 17.222       | 2.36   | 2.59     |
| 2               | 51.07           | 1177.054       | 647.934      | 97.64  | 97.41    |

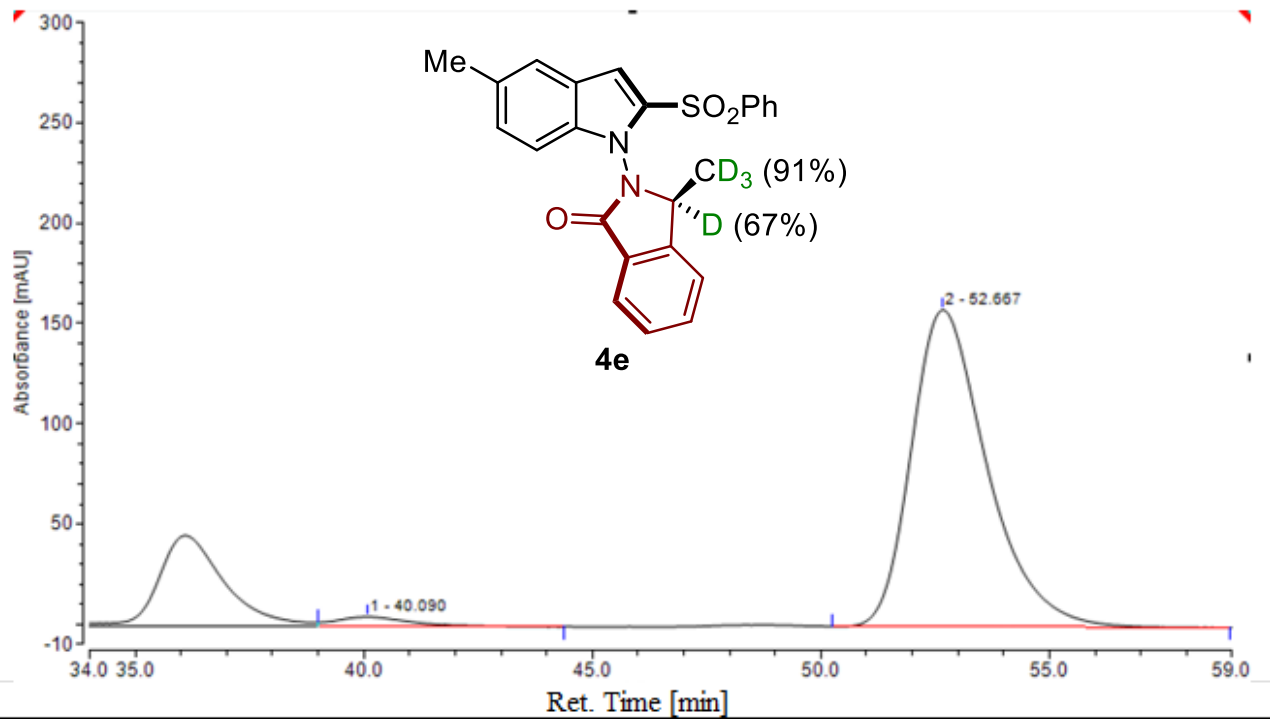

| Peak | Ret. Time (min) | Area (mAu*min) | Height (mAu) | Area % | Height % |
|------|-----------------|----------------|--------------|--------|----------|
| 1    | 40.090          | 9.269          | 4.847        | 2.97   | 2.98     |
| 2    | 52.667          | 302.843        | 158.017      | 97.03  | 97.02    |

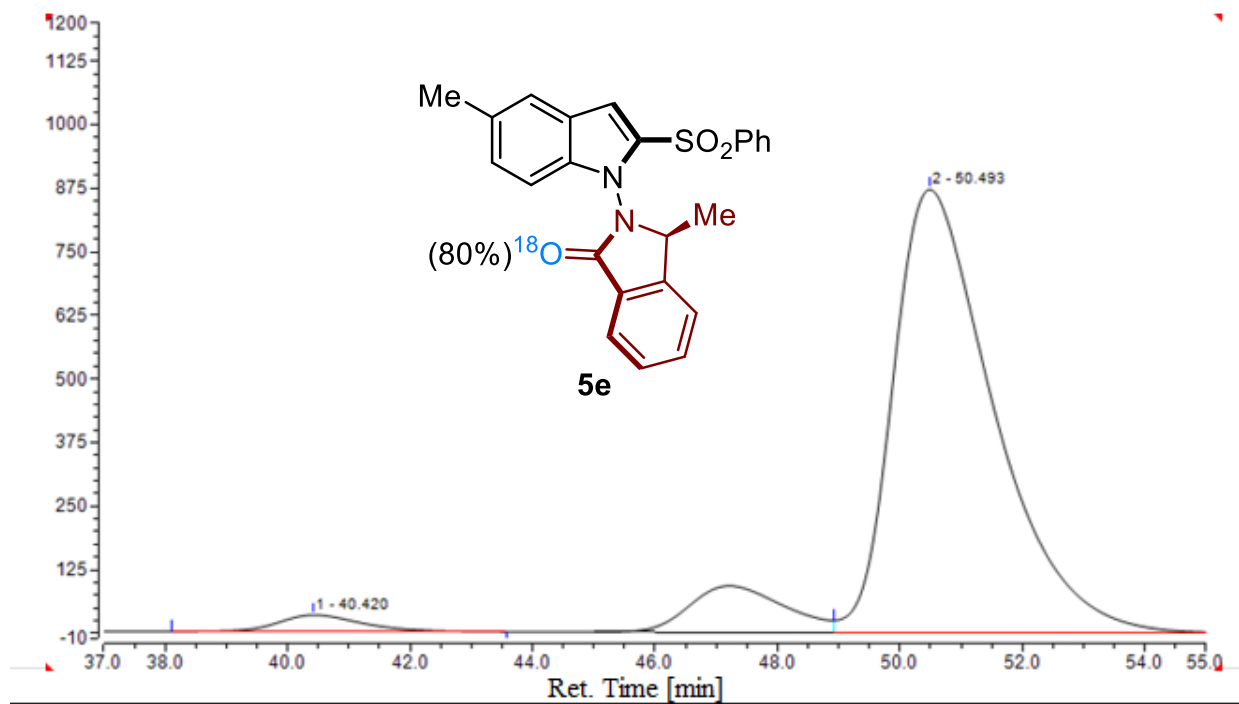

| Peak | Ret. Time (min) | Area (mAu*min) | Height (mAu) | Area % | Height % |
|------|-----------------|----------------|--------------|--------|----------|
| 1    | 40.420          | 52.762         | 32.177       | 3.09   | 3.63     |
| 2    | 50.493          | 1653.888       | 871.207      | 96.91  | 96.37    |

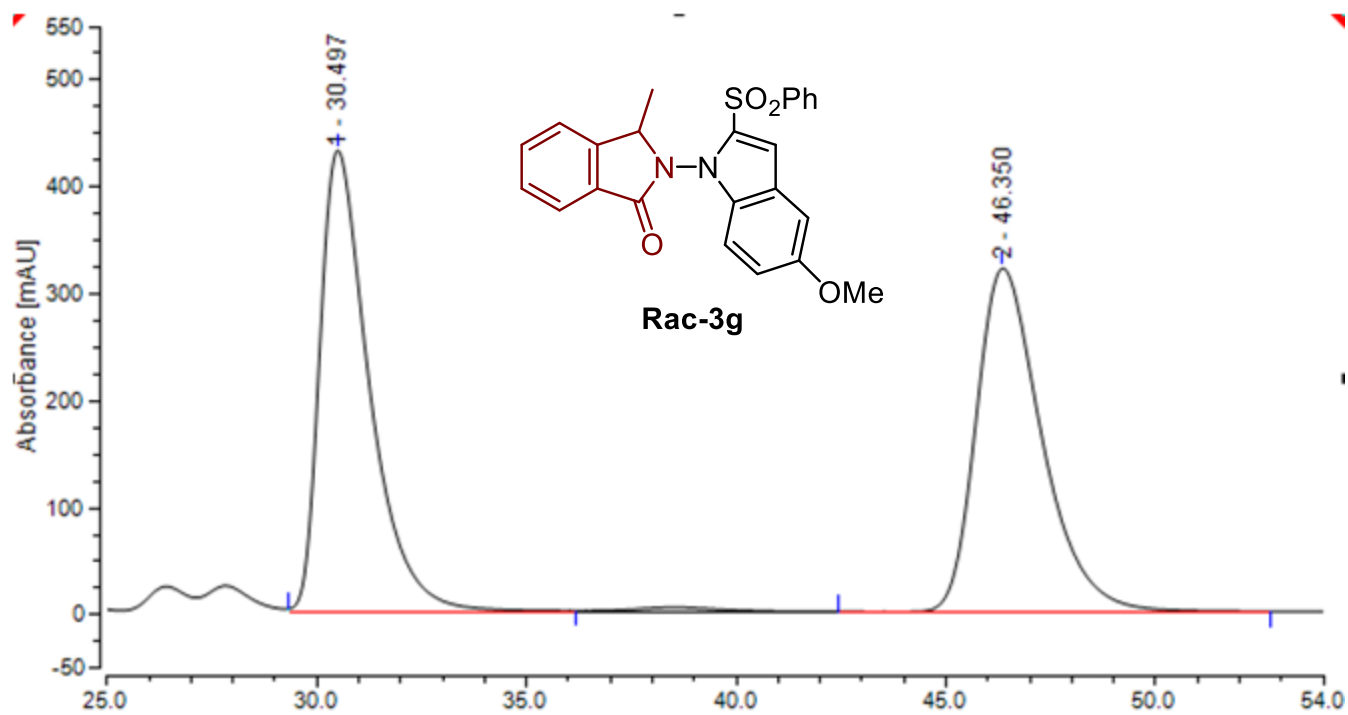

| Peak | Ret. Time (min) | Area (mAu*min) | Height (mAu) | Area % | Height % |
|------|-----------------|----------------|--------------|--------|----------|
| 1    | 30.50           | 586.755        | 431.155      | 50.36  | 57.34    |
| 2    | 46.35           | 578.289        | 320.723      | 49.64  | 42.66    |

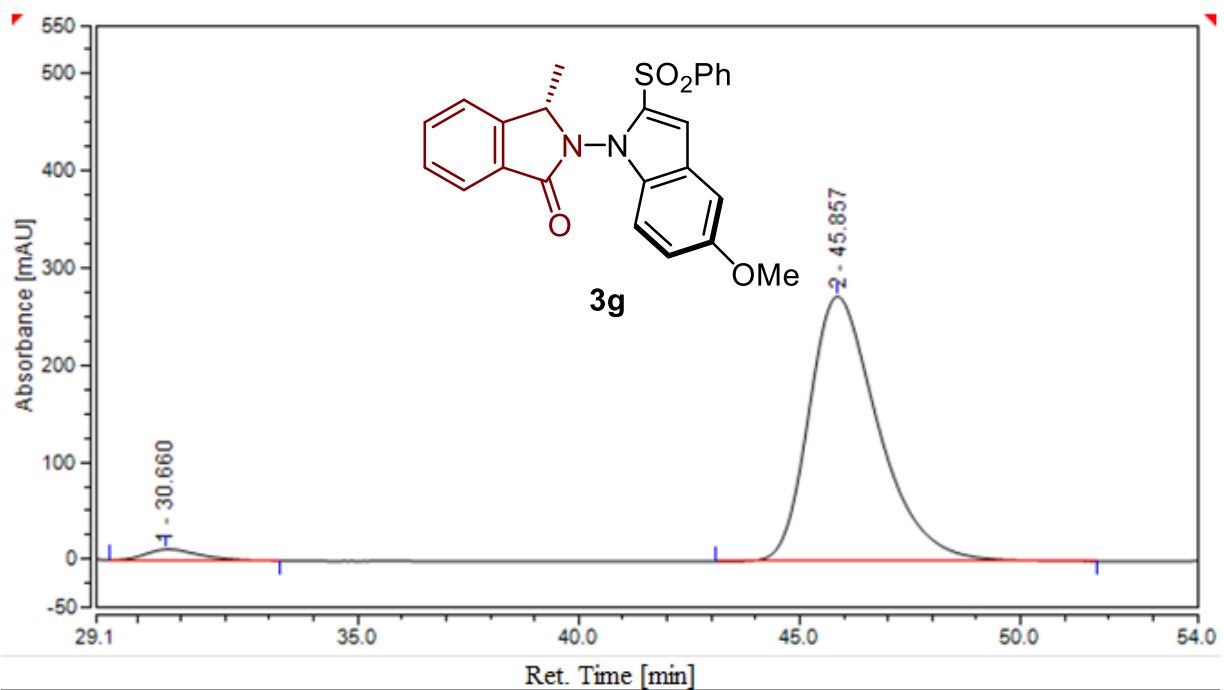

| Peak | Ret. Time (min) | Area (mAu*min) | Height (mAu) | Area % | Height % |
|------|-----------------|----------------|--------------|--------|----------|
| 1    | 30.66           | 15.650         | 11.259       | 3.06   | 3.96     |
| 2    | 45.86           | 495.856        | 272.832      | 96.94  | 96.04    |

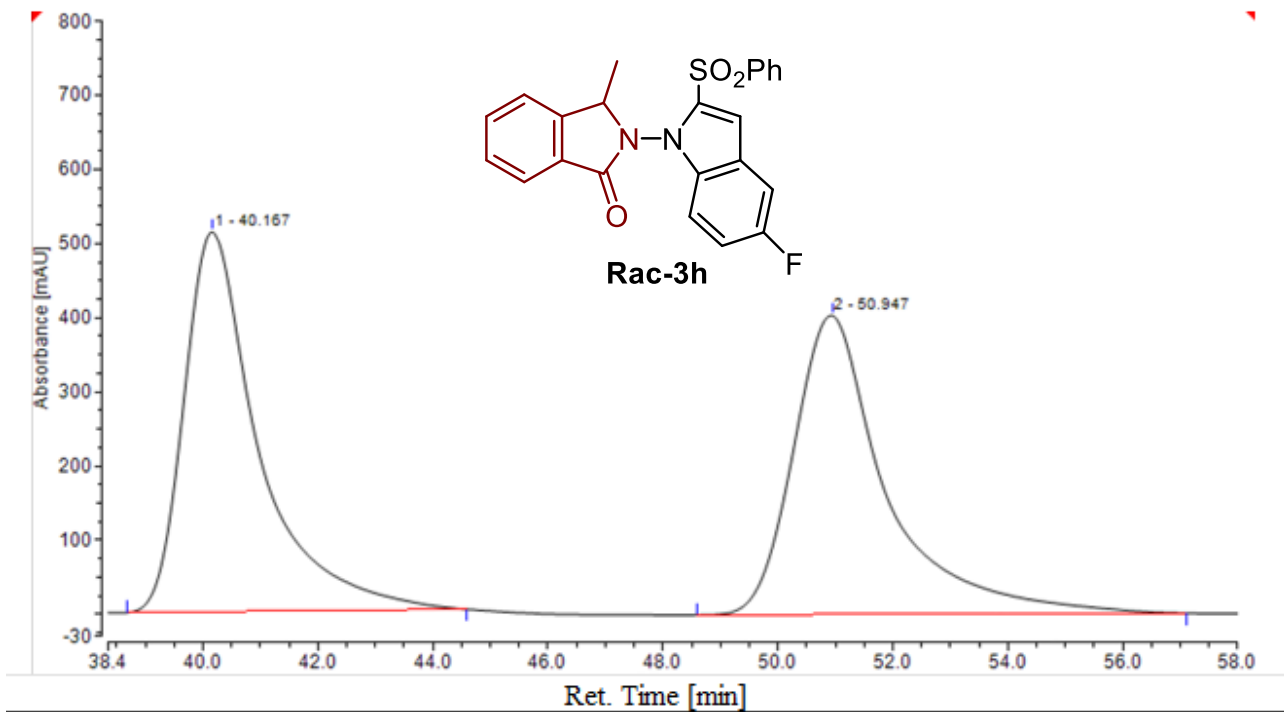

| Peak | Ret. Time (min) | Area (mAu*min) | Height (mAu) | Area % | Height % |
|------|-----------------|----------------|--------------|--------|----------|
| 1    | 40.167          | 768.554        | 512.251      | 50.48  | 55.94    |
| 2    | 50.947          | 753.857        | 403.402      | 49.52  | 44.06    |

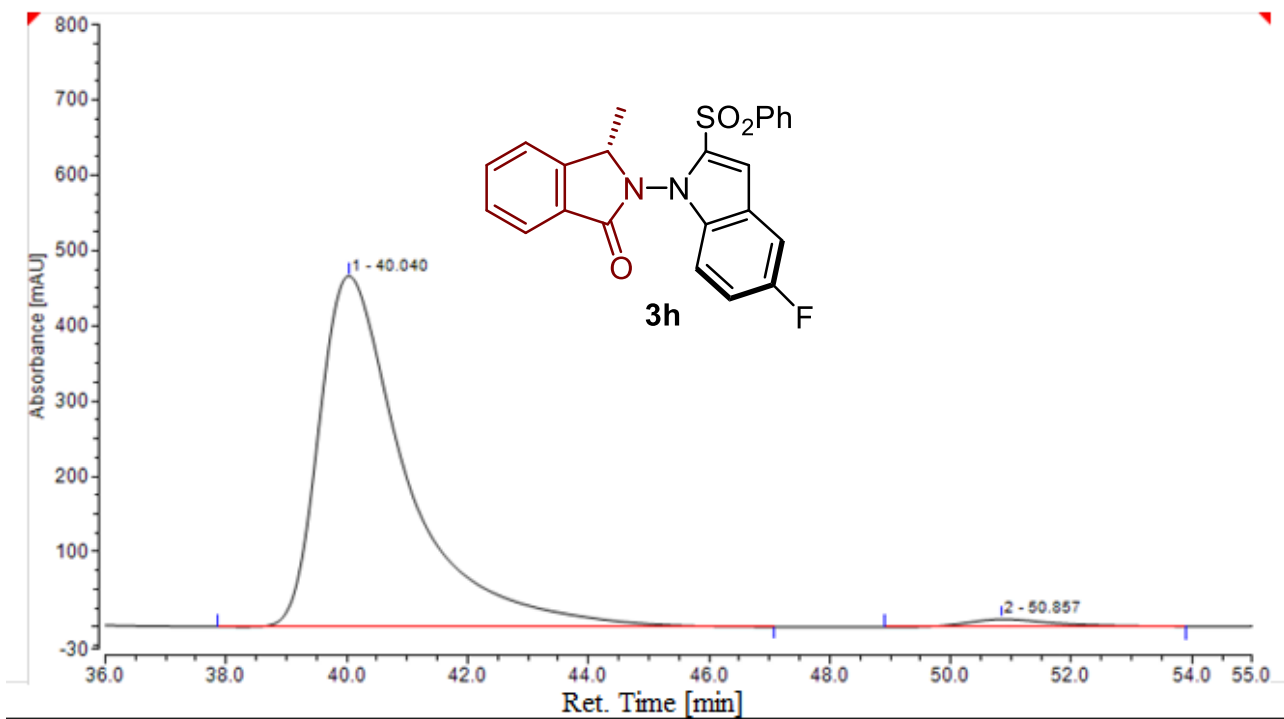

| Peak | Ret. Time (min) | Area (mAu*min) | Height (mAu) | Area % | Height % |
|------|-----------------|----------------|--------------|--------|----------|
| 1    | 40.040          | 782.646        | 466.134      | 97.91  | 97.89    |
| 2    | 50.857          | 16.743         | 10.043       | 2.09   | 2.11     |

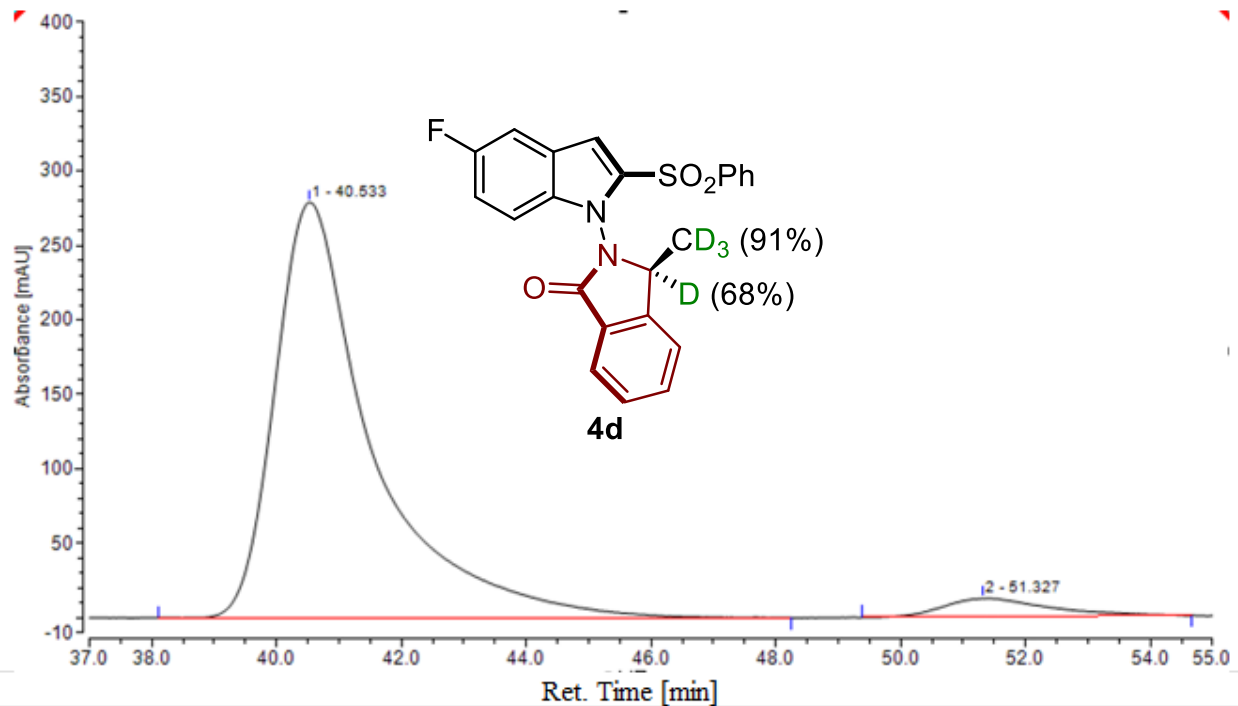

| Peak | Ret. Time (min) | Area (mAu*min) | Height (mAu) | Area % | Height % |
|------|-----------------|----------------|--------------|--------|----------|
| 1    | 40.533          | 501.535        | 278.743      | 95.44  | 95.78    |
| 2    | 51.327          | 23.955         | 12.267       | 4.56   | 4.22     |

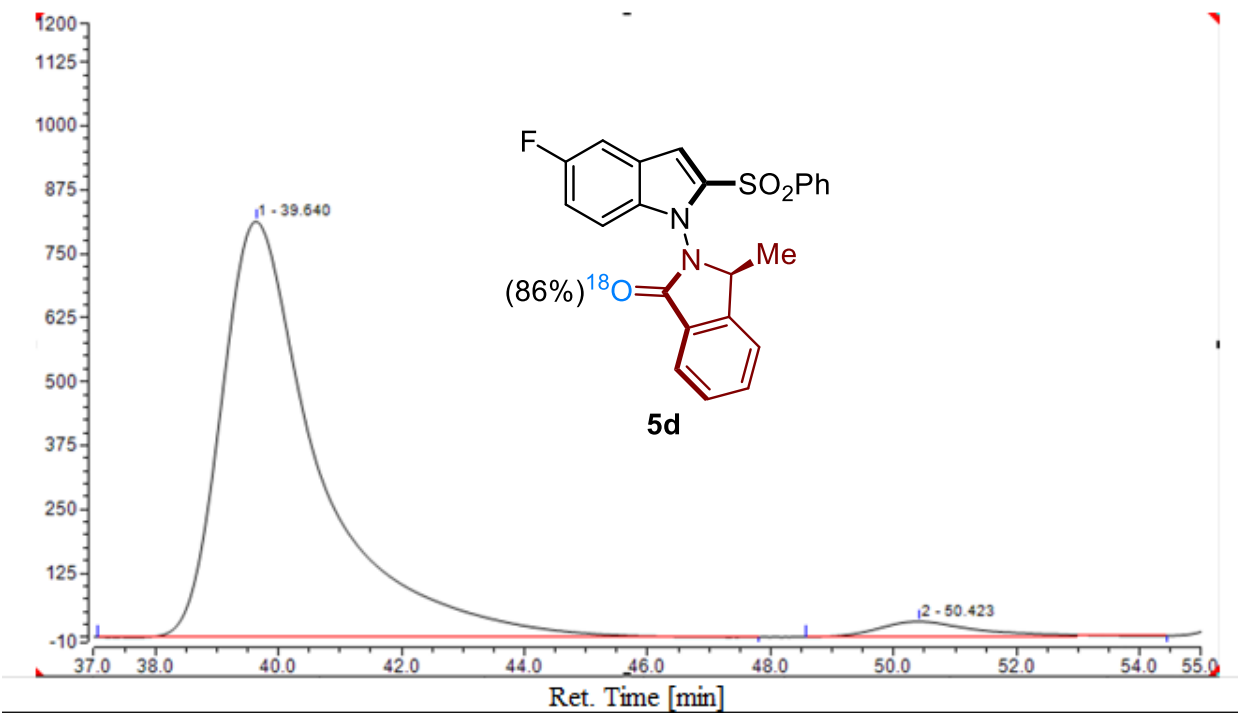

| Peak | Ret. Time (min) | Area (mAu*min) | Height (mAu) | Area % | Height % |
|------|-----------------|----------------|--------------|--------|----------|
| 1    | 39.640          | 1497.473       | 813.561      | 96.55  | 96.52    |
| 2    | 50.423          | 53.441         | 29.346       | 3.45   | 3.48     |



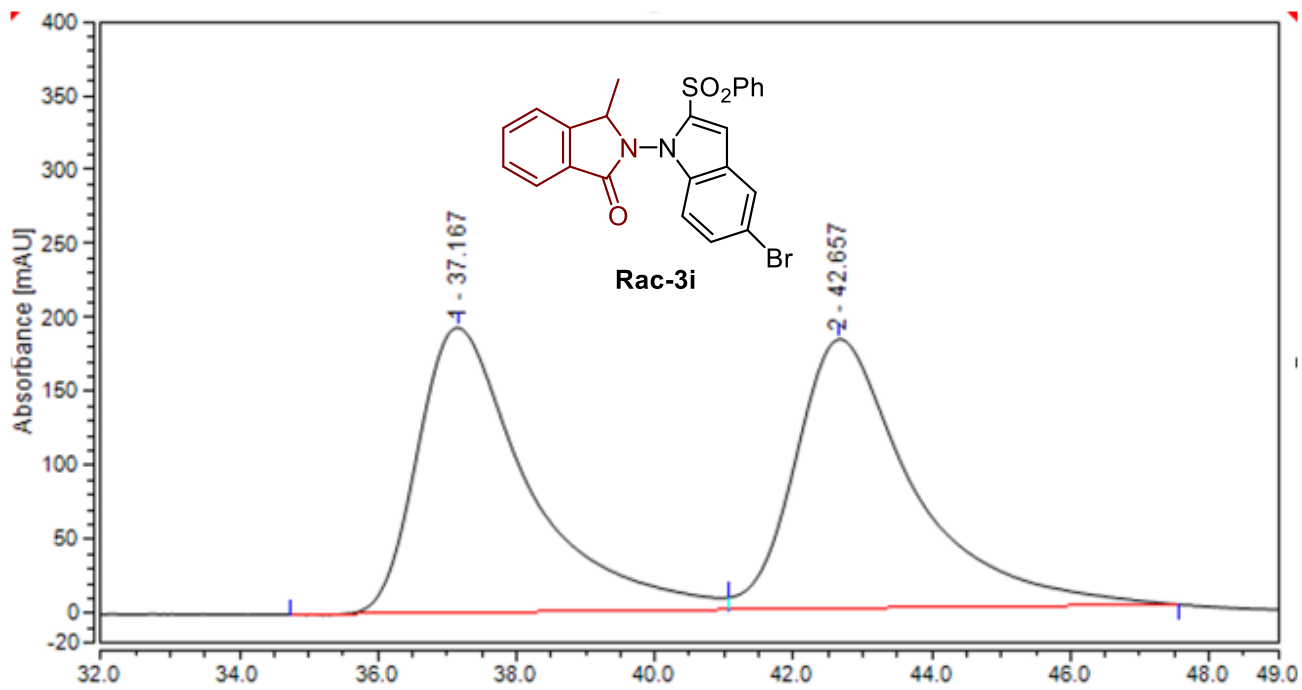

| Peak | Ret. Time (min) | Area (mAu*min) | Height (mAu) | Area % | Height % |
|------|-----------------|----------------|--------------|--------|----------|
| 1    | 37.17           | 357.105        | 192.645      | 49.84  | 51.43    |
| 2    | 42.66           | 359.417        | 181.960      | 50.16  | 48.57    |

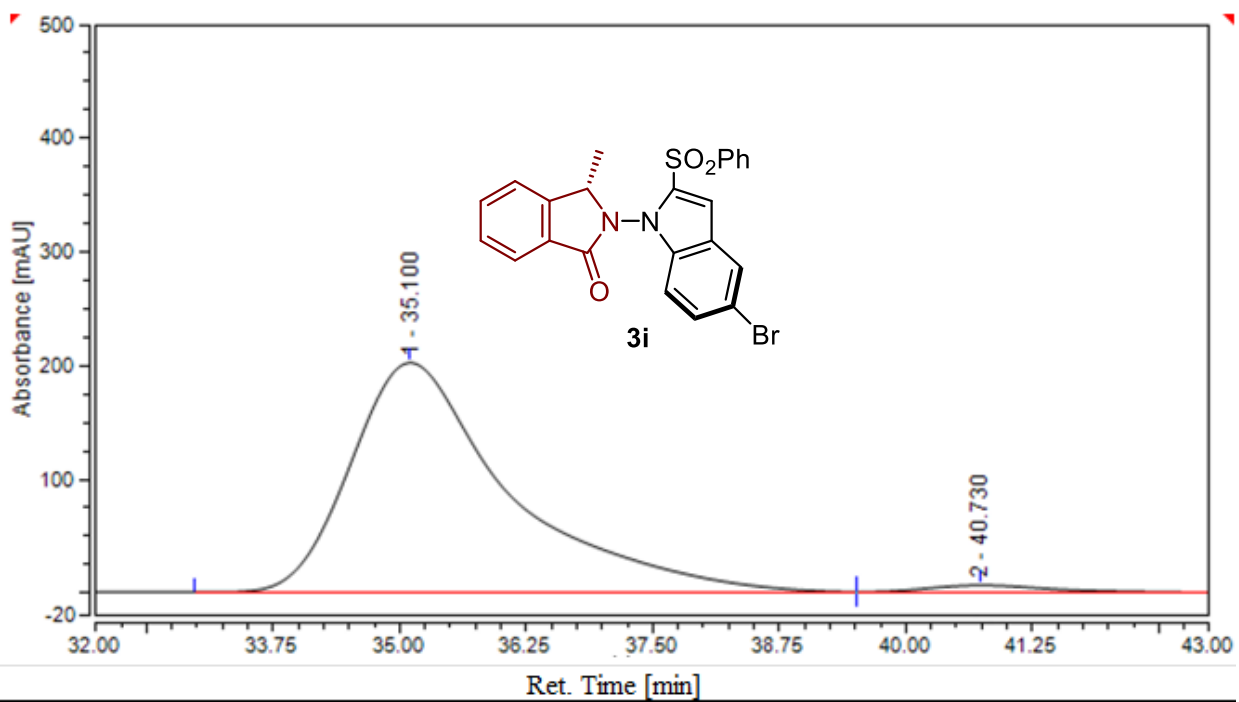

| Peak | Ret. Time (min) | Area (mAu*min) | Height (mAu) | Area % | Height % |
|------|-----------------|----------------|--------------|--------|----------|
| 1    | 35.10           | 364.086        | 201.747      | 97.56  | 96.97    |
| 2    | 40.73           | 9.103          | 6.296        | 2.44   | 3.03     |

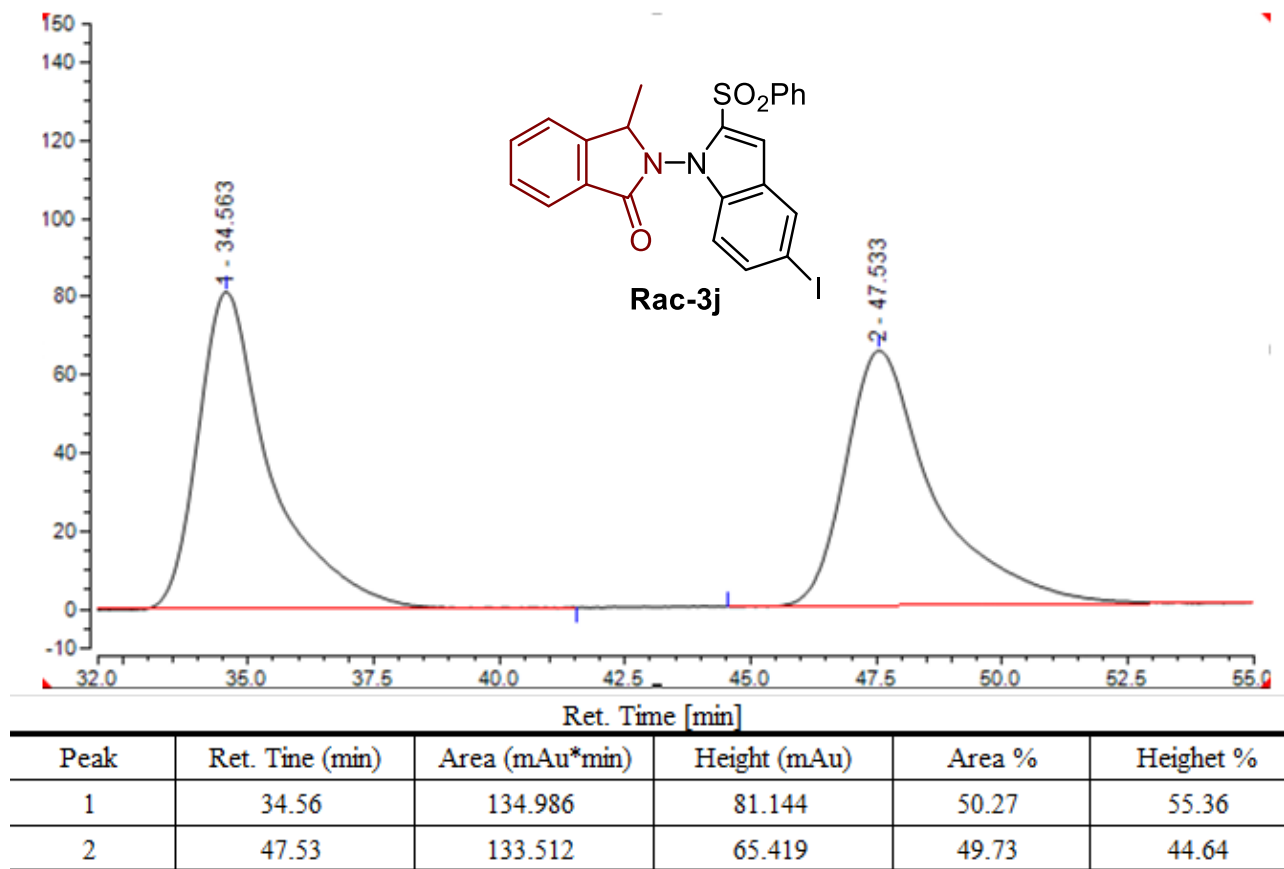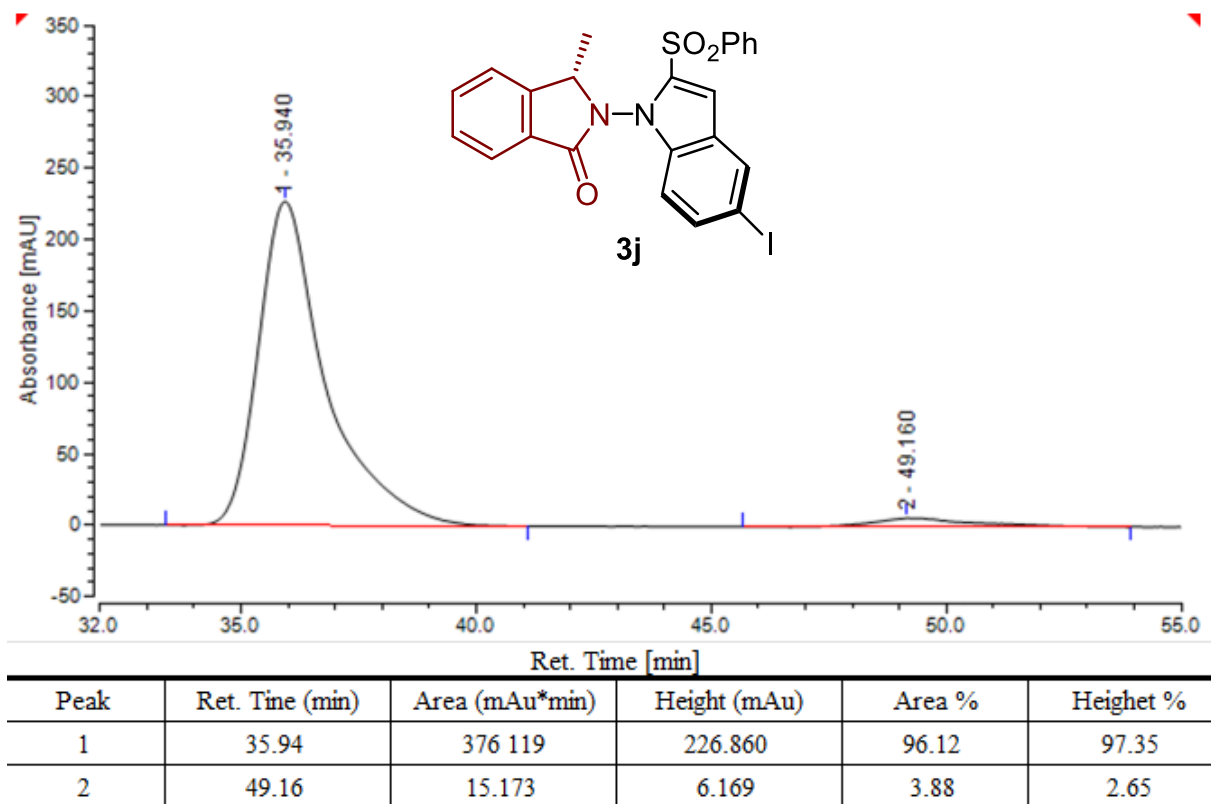

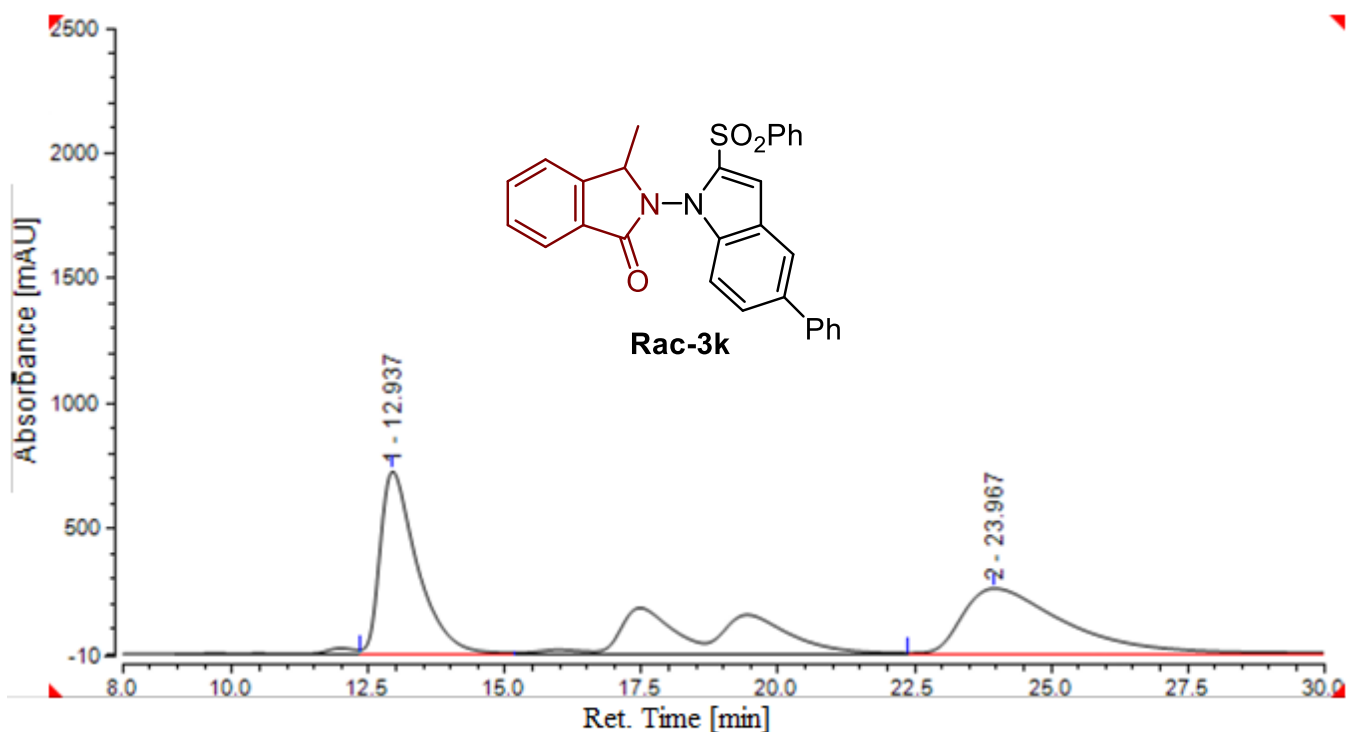

| Peak | Ret. Time (min) | Area (mAu*min) | Height (mAu) | Area % | Height % |
|------|-----------------|----------------|--------------|--------|----------|
| 1    | 12.940          | 574.239        | 729.857      | 49.73  | 73.62    |
| 2    | 23.970          | 580.502        | 261.516      | 50.27  | 26.38    |

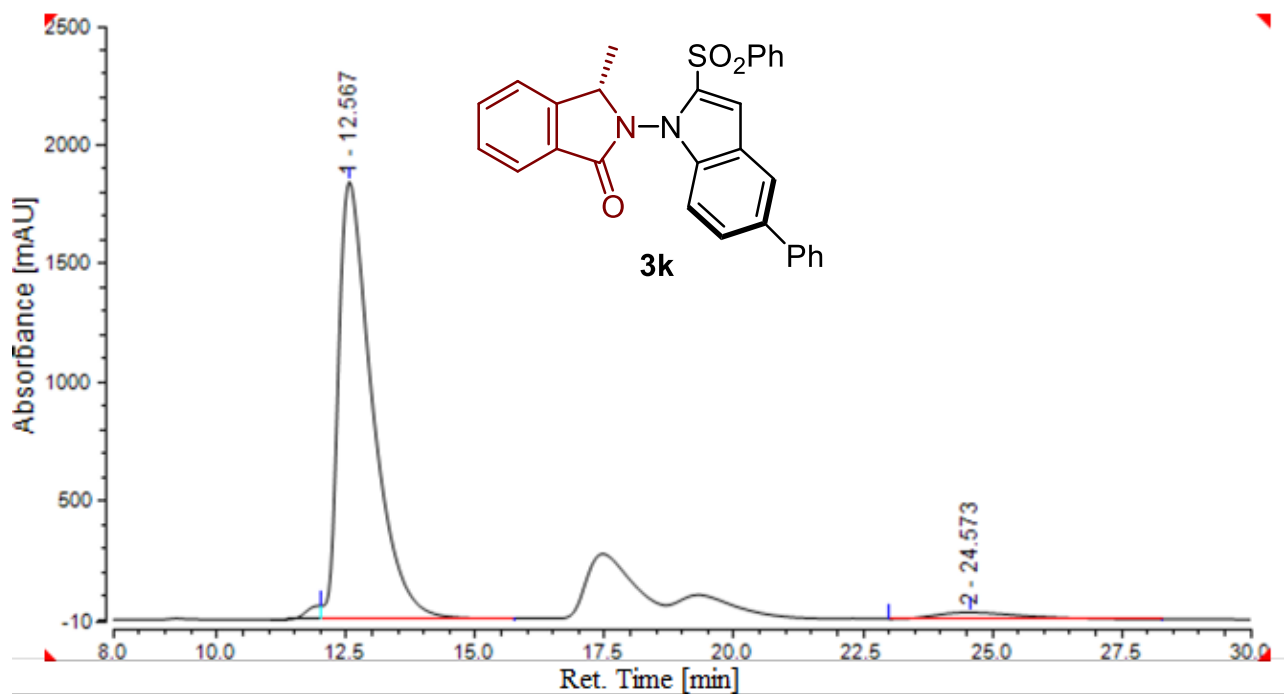

| Peak | Ret. Time (min) | Area (mAu*min) | Height (mAu) | Area % | Height % |
|------|-----------------|----------------|--------------|--------|----------|
| 1    | 12.567          | 1396.576       | 1844.393     | 96.26  | 98.53    |
| 2    | 24.573          | 54.268         | 27.490       | 3.74   | 1.47     |

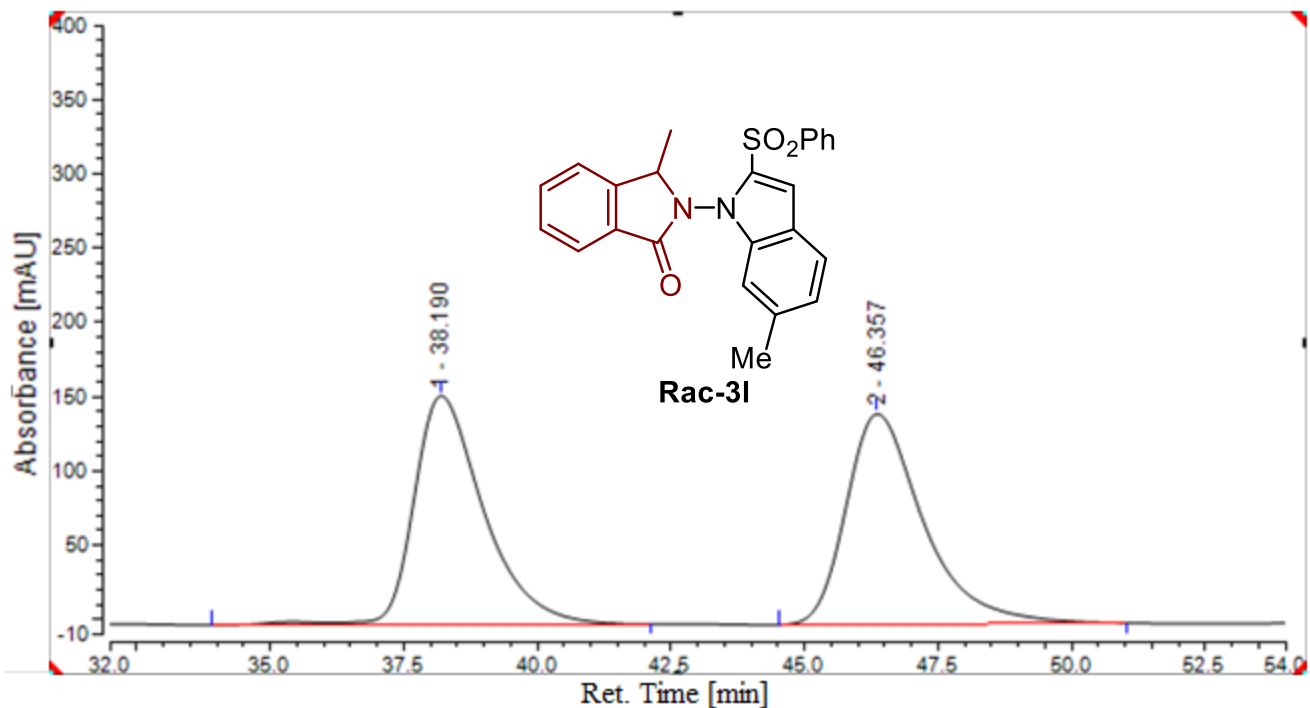

| Peak | Ret. Time (min) | Area (mAu*min) | Height (mAu) | Area % | Height % |
|------|-----------------|----------------|--------------|--------|----------|
| 1    | 38.19           | 234.075        | 154.168      | 49.58  | 52.10    |
| 2    | 46.36           | 238.051        | 141.760      | 50.42  | 47.90    |

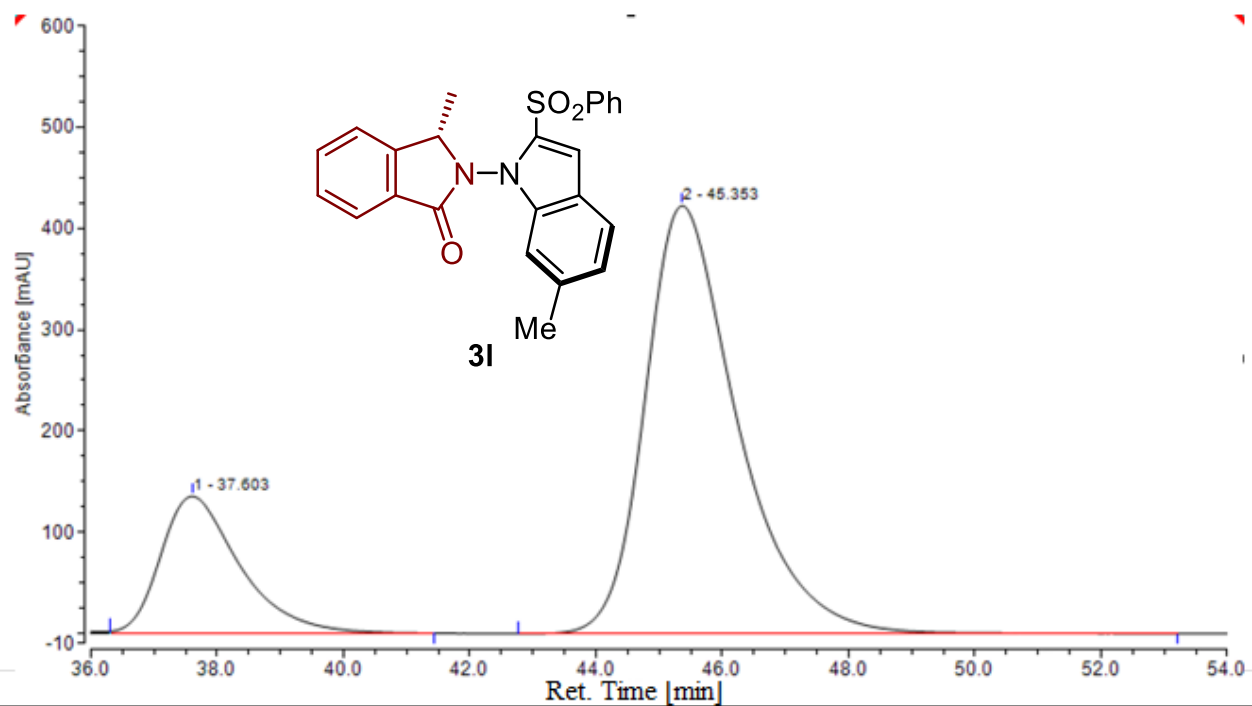

| Peak | Ret. Time (min) | Area (mAu*min) | Height (mAu) | Area % | Height % |
|------|-----------------|----------------|--------------|--------|----------|
| 1    | 37.60           | 196.292        | 135.300      | 21.49  | 24.26    |
| 2    | 45.35           | 717.196        | 422.511      | 78.51  | 75.74    |

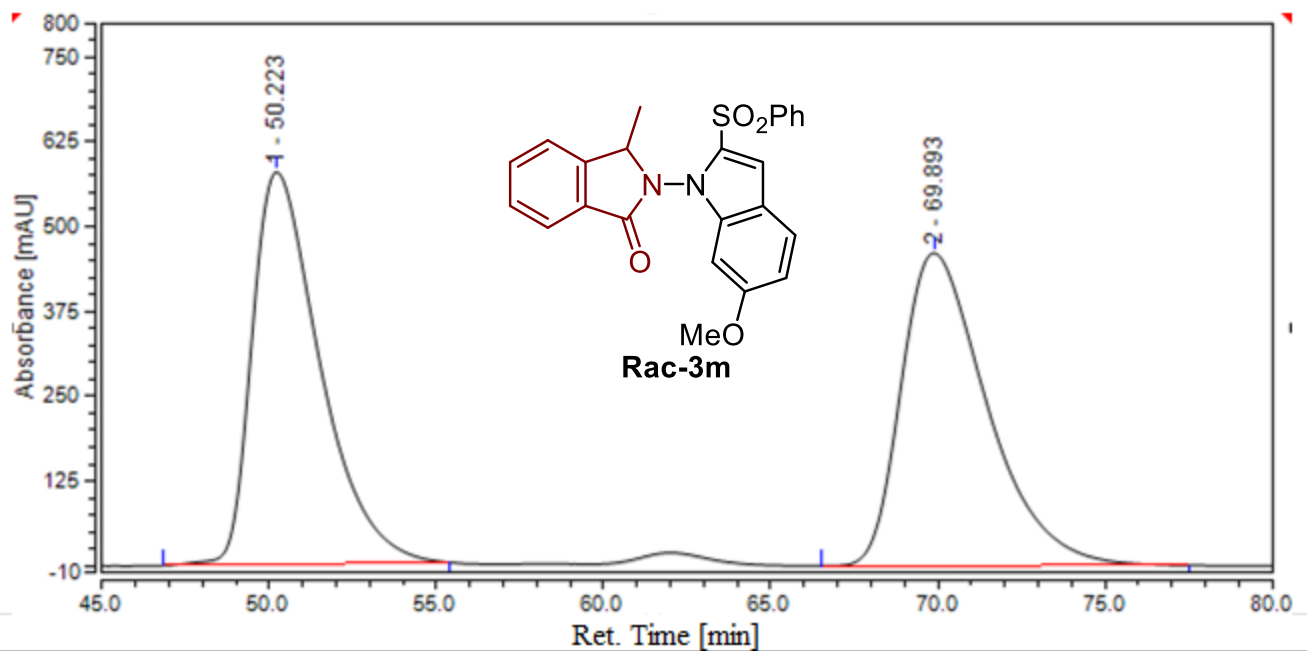

| Peak | Ret. Time (min) | Area (mAu*min) | Height (mAu) | Area % | Height % |
|------|-----------------|----------------|--------------|--------|----------|
| 1    | 50.22           | 1358.358       | 578.018      | 49.80  | 55.65    |
| 2    | 69.89           | 1369.488       | 460.578      | 50.20  | 44.35    |

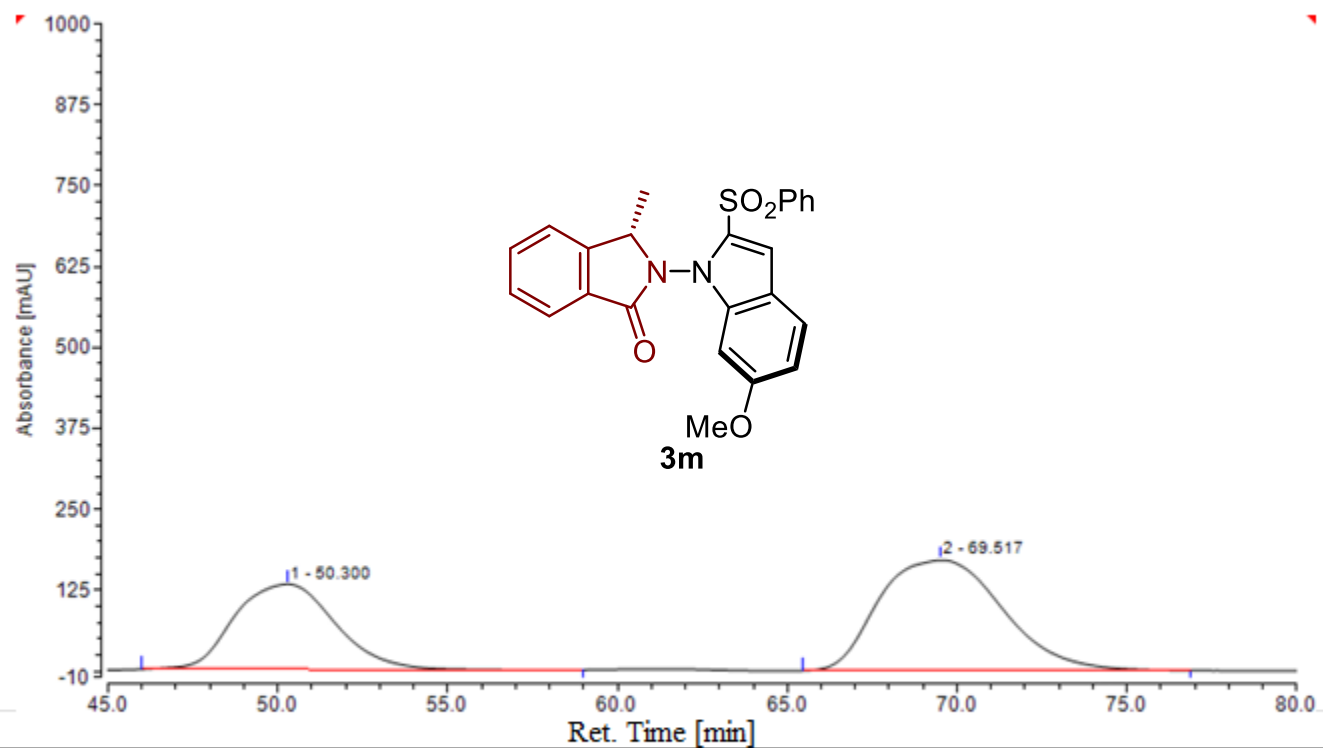

| Peak | Ret. Time (min) | Area (mAu*min) | Height (mAu) | Area % | Height % |
|------|-----------------|----------------|--------------|--------|----------|
| 1    | 50.30           | 449.690        | 131.769      | 38.42  | 43.59    |
| 2    | 69.52           | 720.666        | 170.547      | 61.58  | 56.41    |

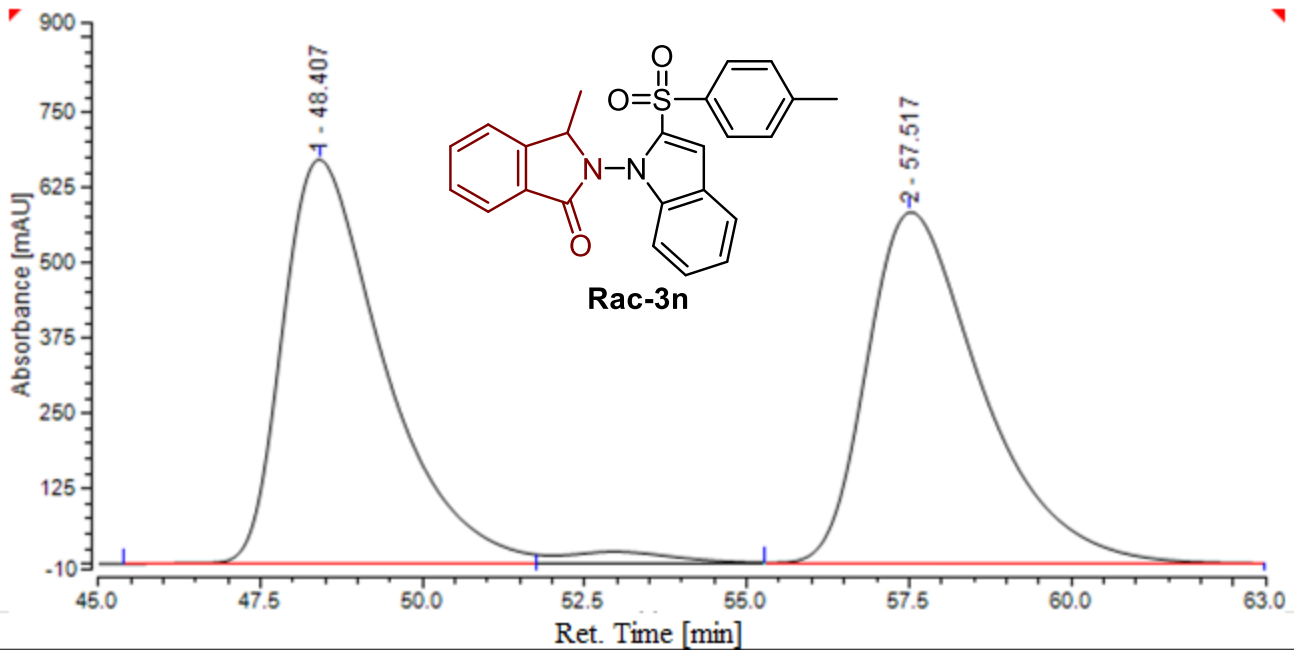

| Peak | Ret. Time (min) | Area (mAu*min) | Height (mAu) | Area % | Height % |
|------|-----------------|----------------|--------------|--------|----------|
| 1    | 48.41           | 1213.652       | 671.552      | 50.15  | 53.47    |
| 2    | 57.52           | 1206.493       | 584.302      | 49.85  | 46.53    |

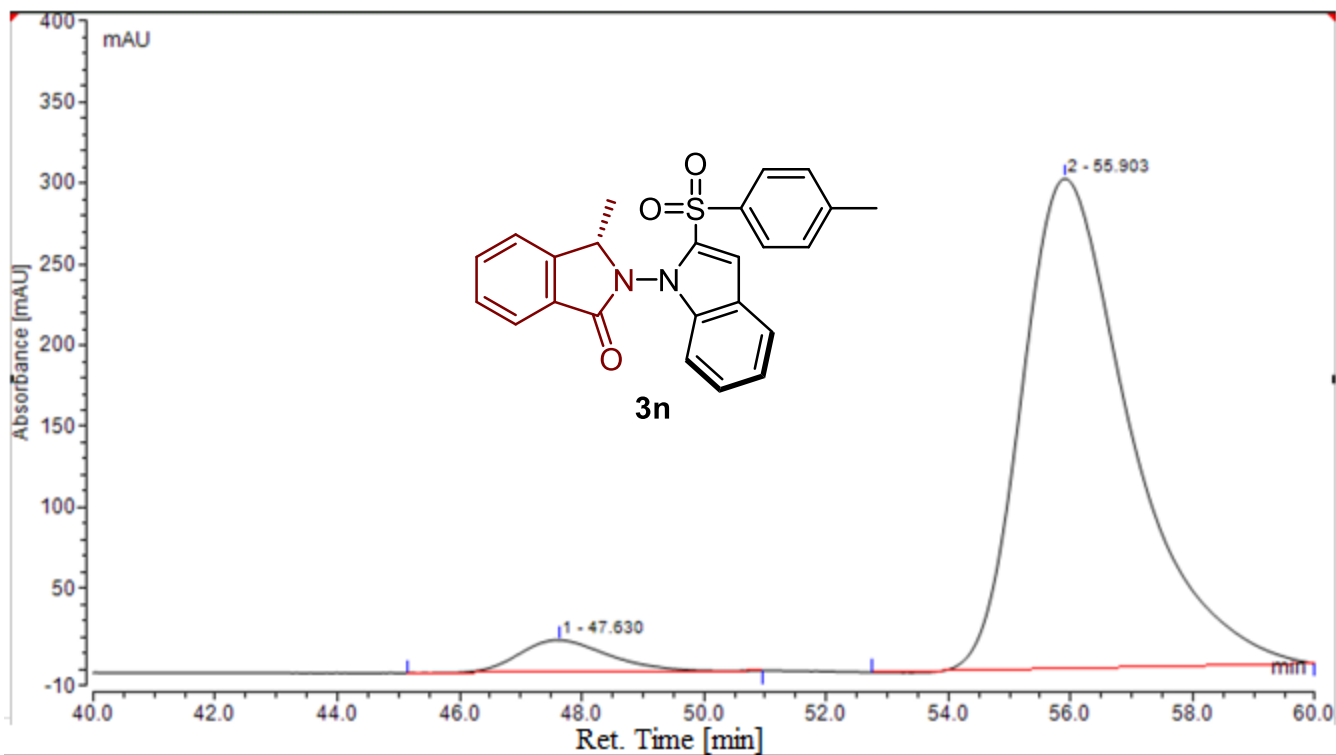

| Peak | Ret. Time (min) | Area (mAu*min) | Height (mAu) | Area % | Height % |
|------|-----------------|----------------|--------------|--------|----------|
| 1    | 47.63           | 33.532         | 19.764       | 5.15   | 6.14     |
| 2    | 55.90           | 617.123        | 301.969      | 94.85  | 93.86    |

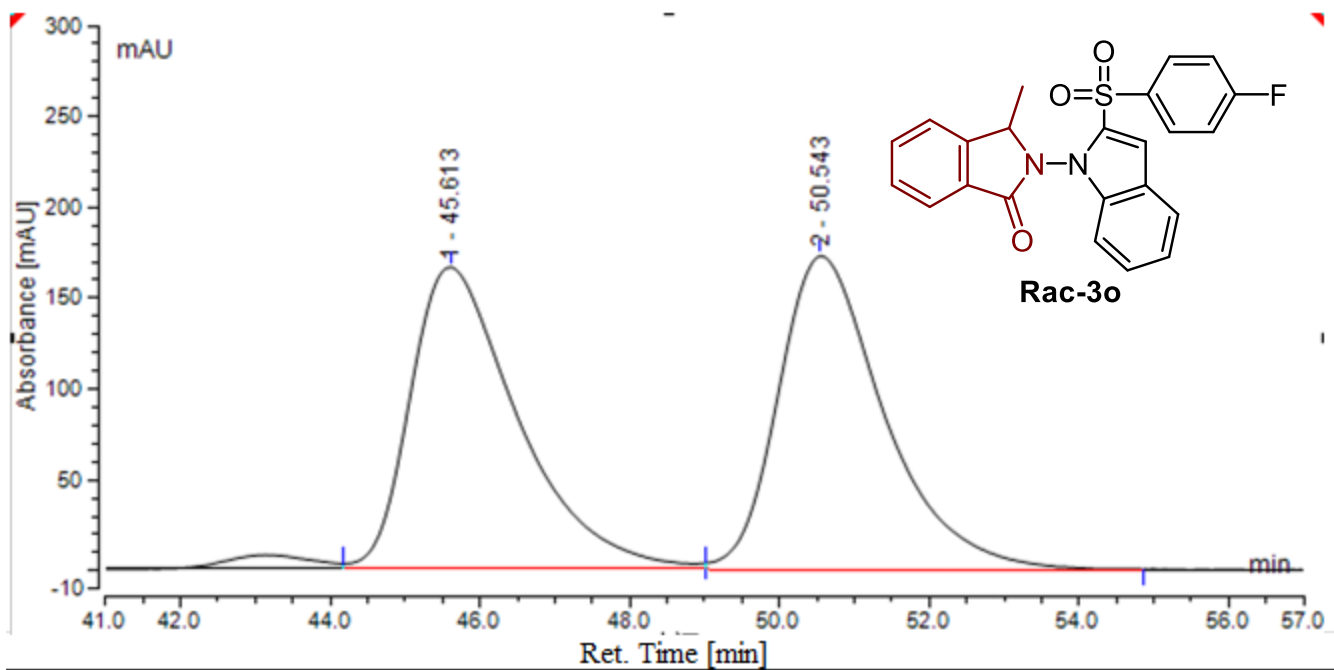

| Peak | Ret. Time (min) | Area (mAu*min) | Height (mAu) | Area % | Height % |
|------|-----------------|----------------|--------------|--------|----------|
| 1    | 45.61           | 277.146        | 166.228      | 49.54  | 49.07    |
| 2    | 50.54           | 282.274        | 172.542      | 50.46  | 50.93    |

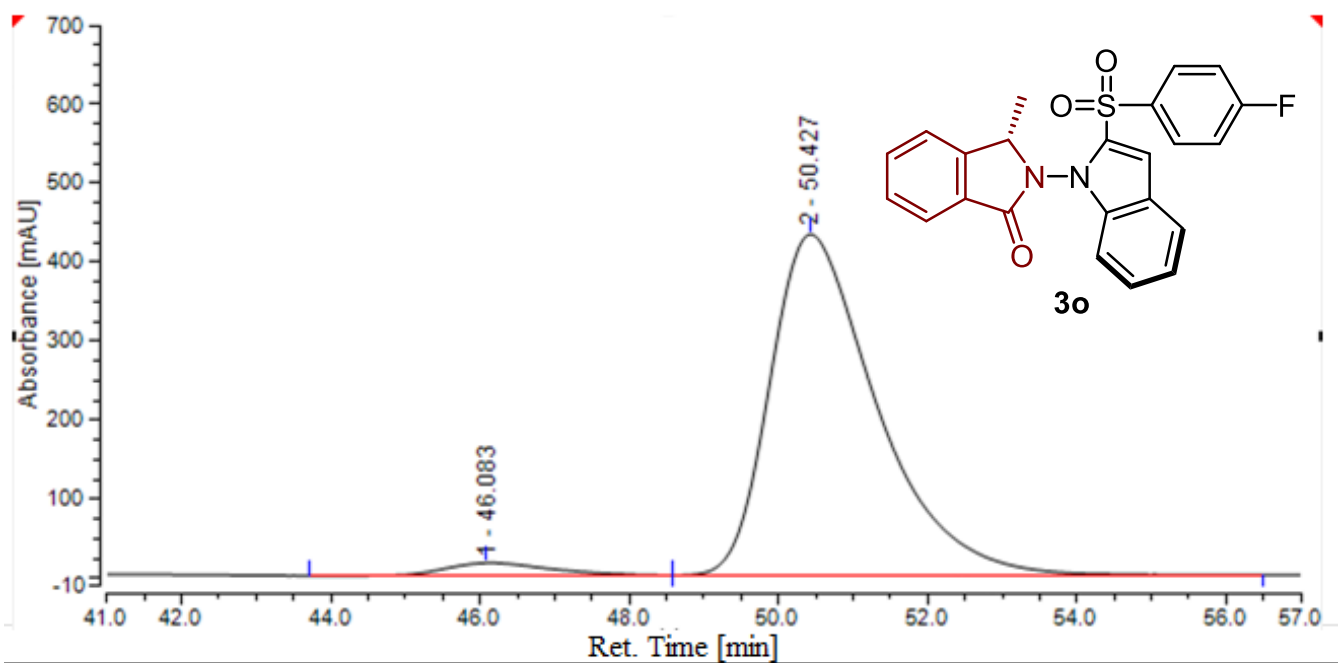

| Peak | Ret. Time (min) | Area (mAu*min) | Height (mAu) | Area % | Height % |
|------|-----------------|----------------|--------------|--------|----------|
| 1    | 46.08           | 25.978         | 16.136       | 3.51   | 3.60     |
| 2    | 50.43           | 713.425        | 431.866      | 96.49  | 96.40    |

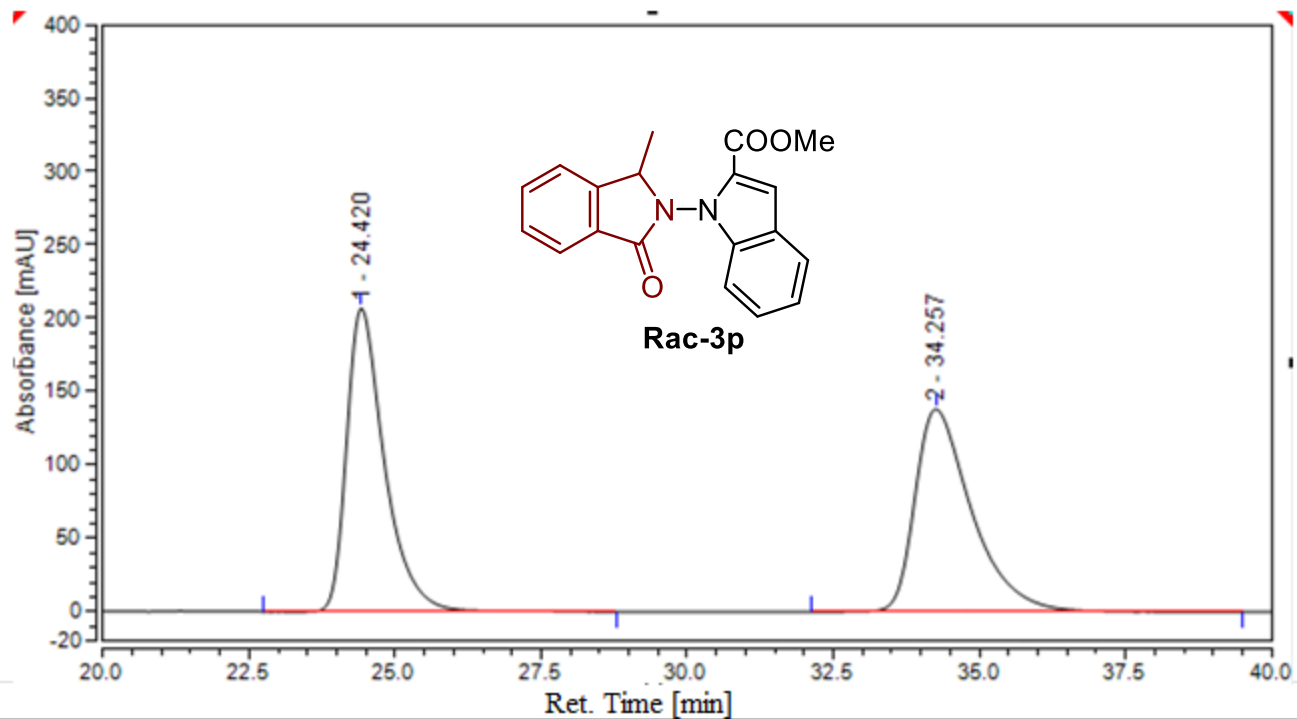

| Peak | Ret. Time (min) | Area (mAu*min) | Height (mAu) | Area % | Height % |
|------|-----------------|----------------|--------------|--------|----------|
| 1    | 24.42           | 155.907        | 206.911      | 50.05  | 59.99    |
| 2    | 34.26           | 155.602        | 138.012      | 49.95  | 40.01    |

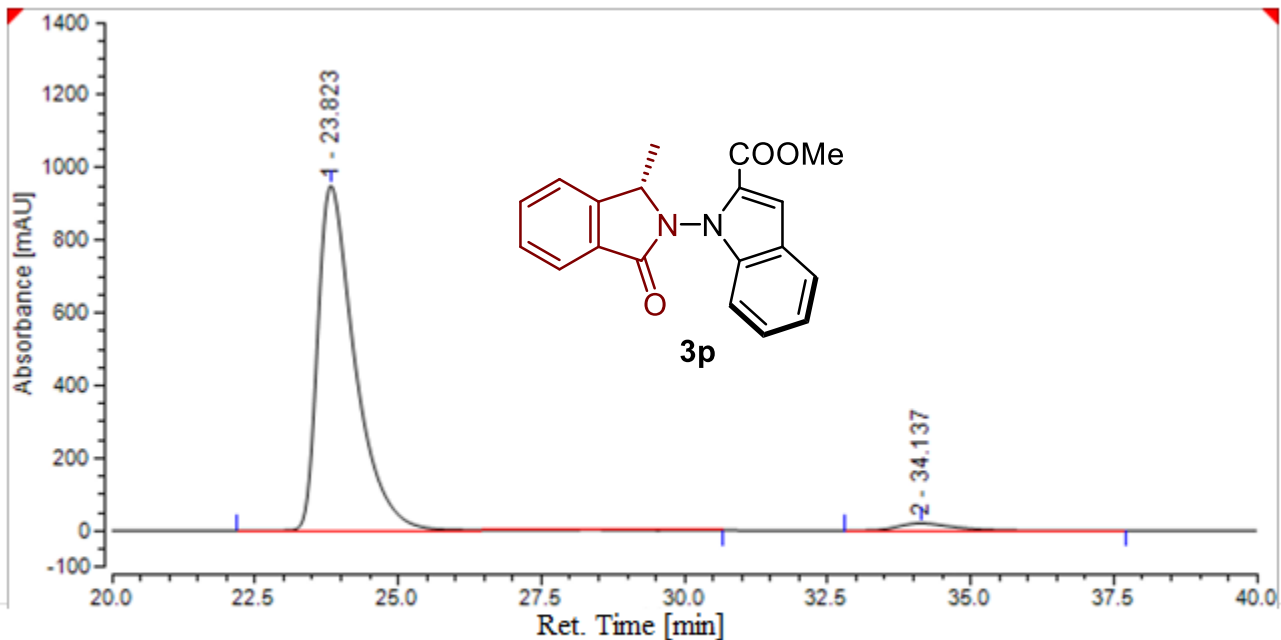

| Peak | Ret. Time (min) | Area (mAu*min) | Height (mAu) | Area % | Height % |
|------|-----------------|----------------|--------------|--------|----------|
| 1    | 23.82           | 713.143        | 950.632      | 96.94  | 97.92    |
| 2    | 34.14           | 22.523         | 20.237       | 3.06   | 2.08     |



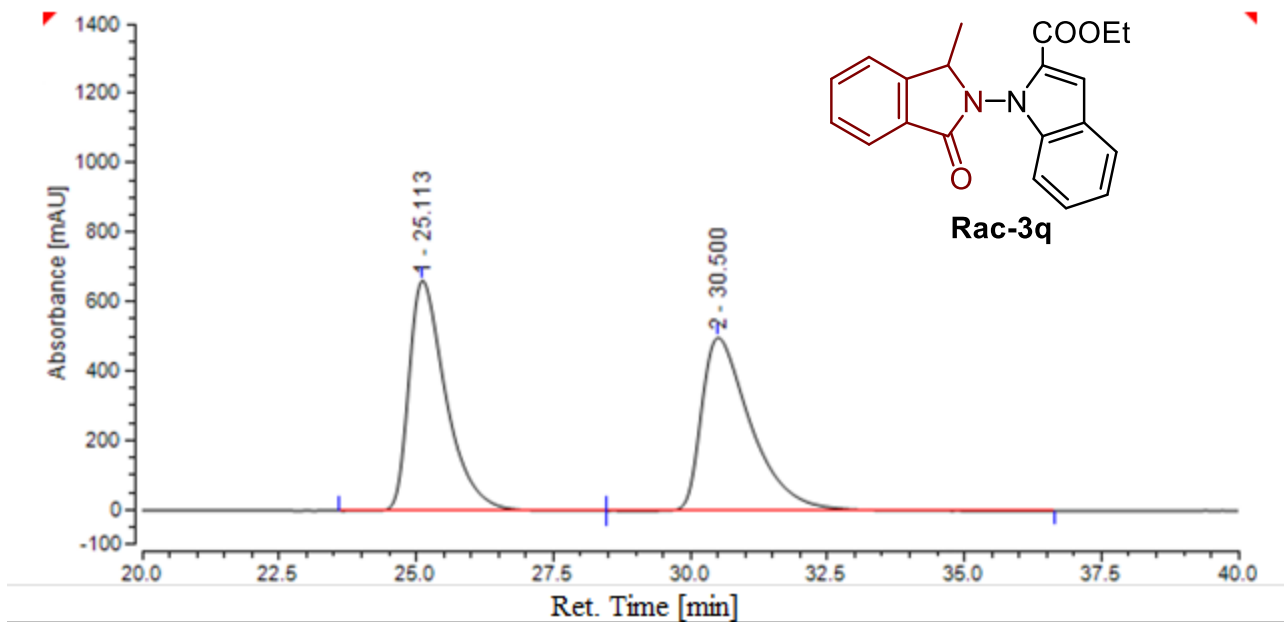

| Peak | Ret. Time (min) | Area (mAu*min) | Height (mAu) | Area % | Height % |
|------|-----------------|----------------|--------------|--------|----------|
| 1    | 25.11           | 517.470        | 663.531      | 49.84  | 57.09    |
| 2    | 30.50           | 520.759        | 498.722      | 50.16  | 42.91    |

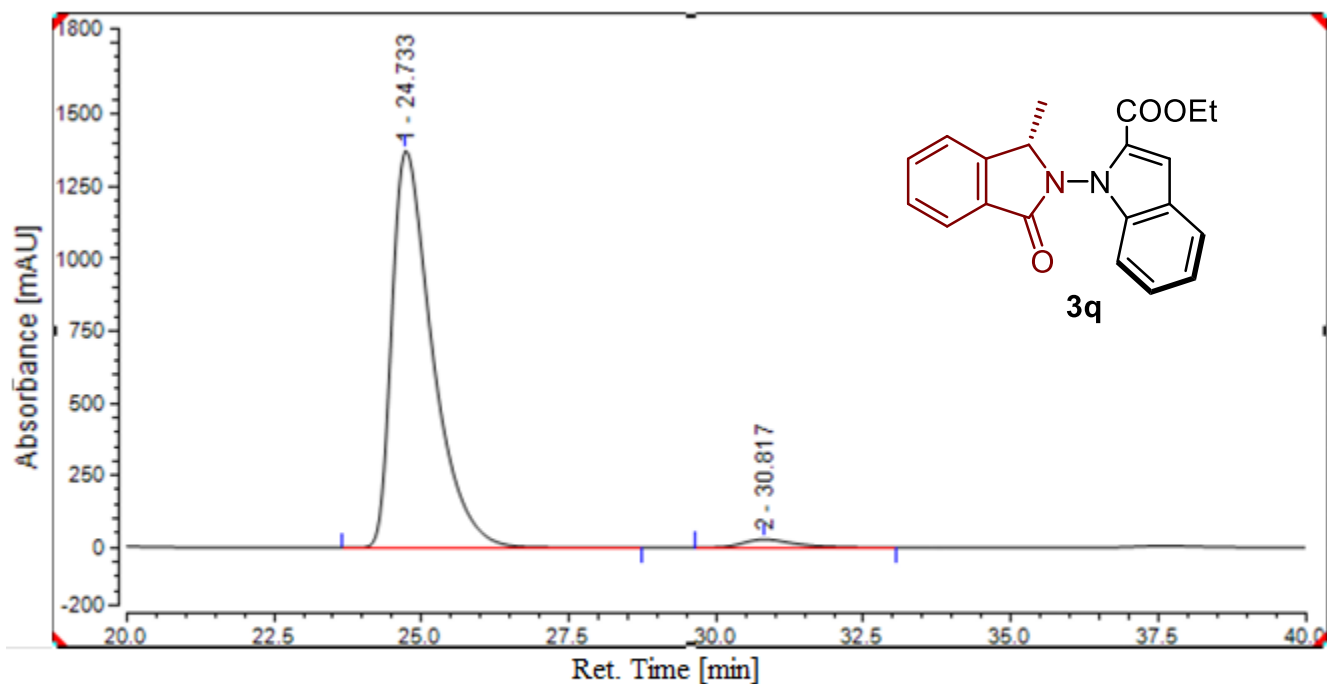

| Peak | Ret. Time (min) | Area (mAu*min) | Height (mAu) | Area % | Height % |
|------|-----------------|----------------|--------------|--------|----------|
| 1    | 24.73           | 1089.289       | 1374.710     | 97.50  | 98.02    |
| 2    | 30.82           | 27.875         | 27.818       | 2.50   | 1.98     |

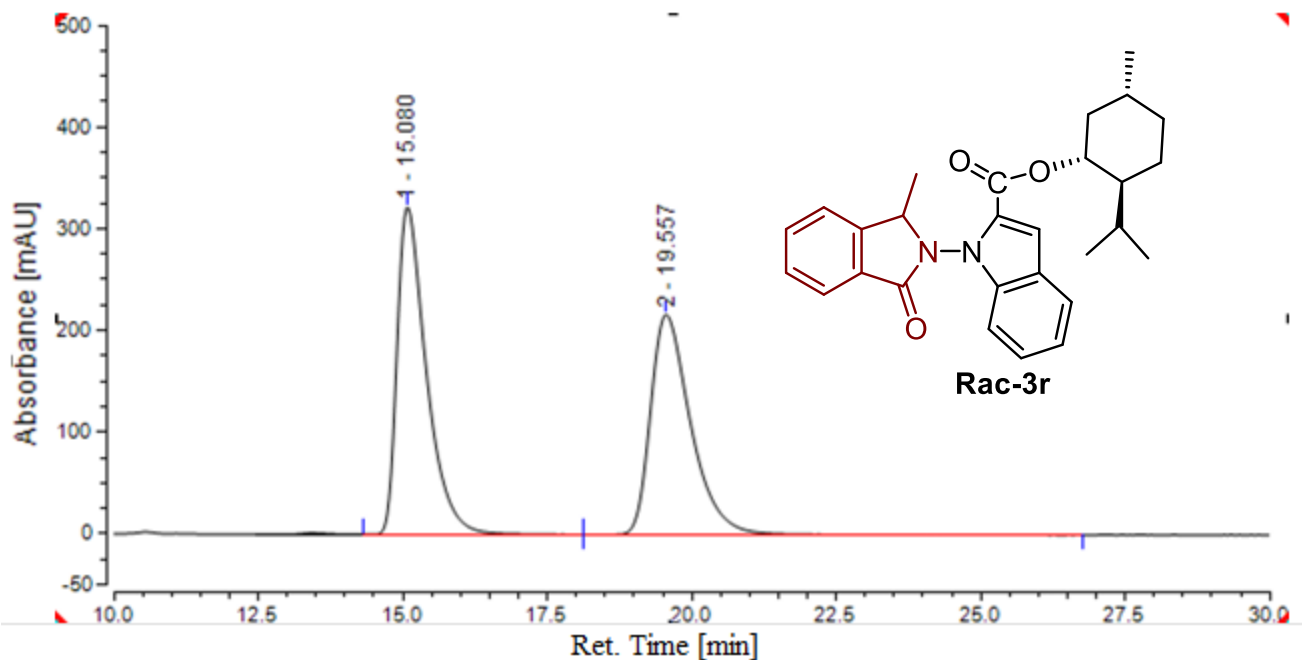

| Peak | Ret. Time (min) | Area (mAu*min) | Height (mAu) | Area % | Height % |
|------|-----------------|----------------|--------------|--------|----------|
| 1    | 15.08           | 188 916        | 321.987      | 52.12  | 59.83    |
| 2    | 19.56           | 173.543        | 216.226      | 47.88  | 40.17    |

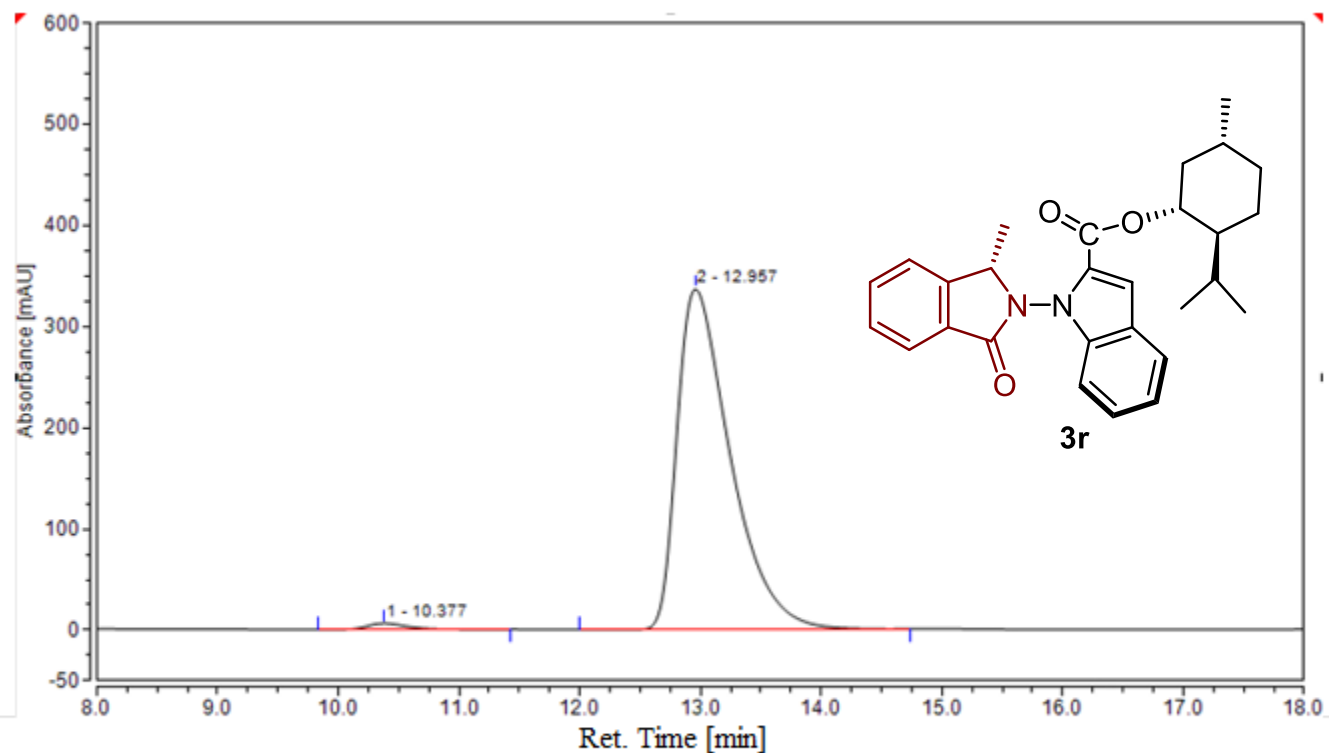

| Peak | Ret. Time (min) | Area (mAu*min) | Height (mAu) | Area % | Height % |
|------|-----------------|----------------|--------------|--------|----------|
| 1    | 10.38           | 2.333          | 6.123        | 1.34   | 1.79     |
| 2    | 12.96           | 171.801        | 336.399      | 98.66  | 98.21    |

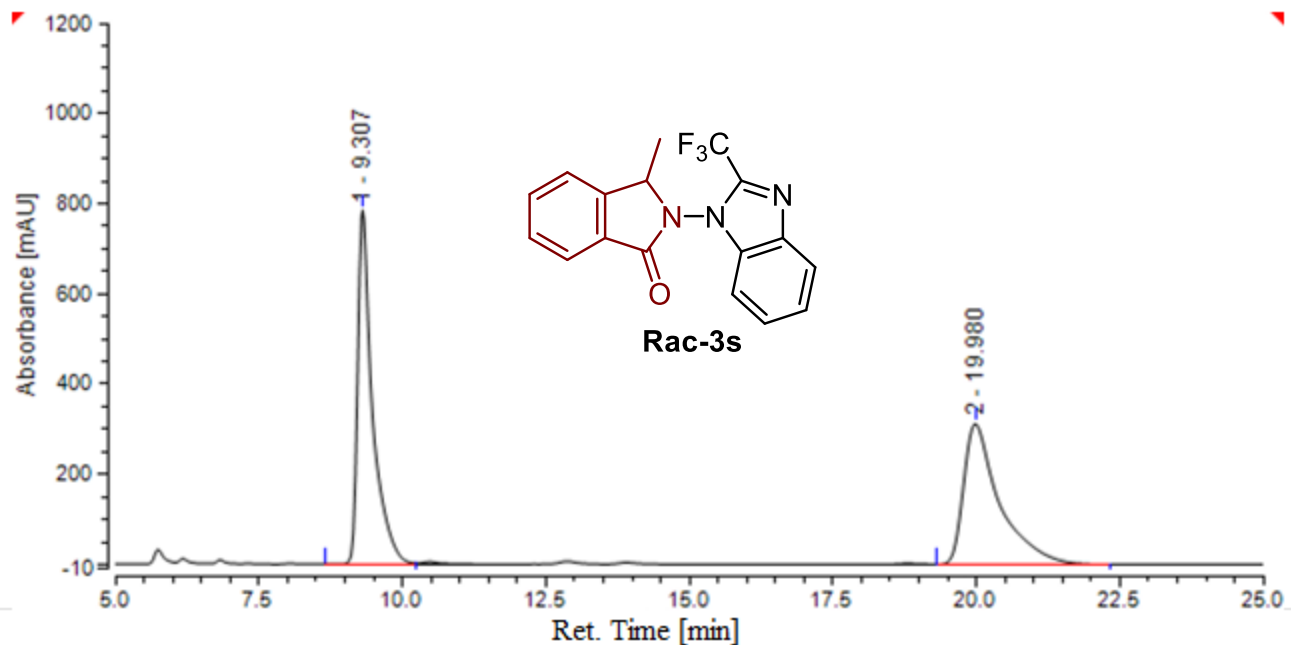

| Peak | Ret. Time (min) | Area (mAu*min) | Height (mAu) | Area % | Height % |
|------|-----------------|----------------|--------------|--------|----------|
| 1    | 9.31            | 232.812        | 785.073      | 50.71  | 71.54    |
| 2    | 19.98           | 226.301        | 312.268      | 49.29  | 28.46    |

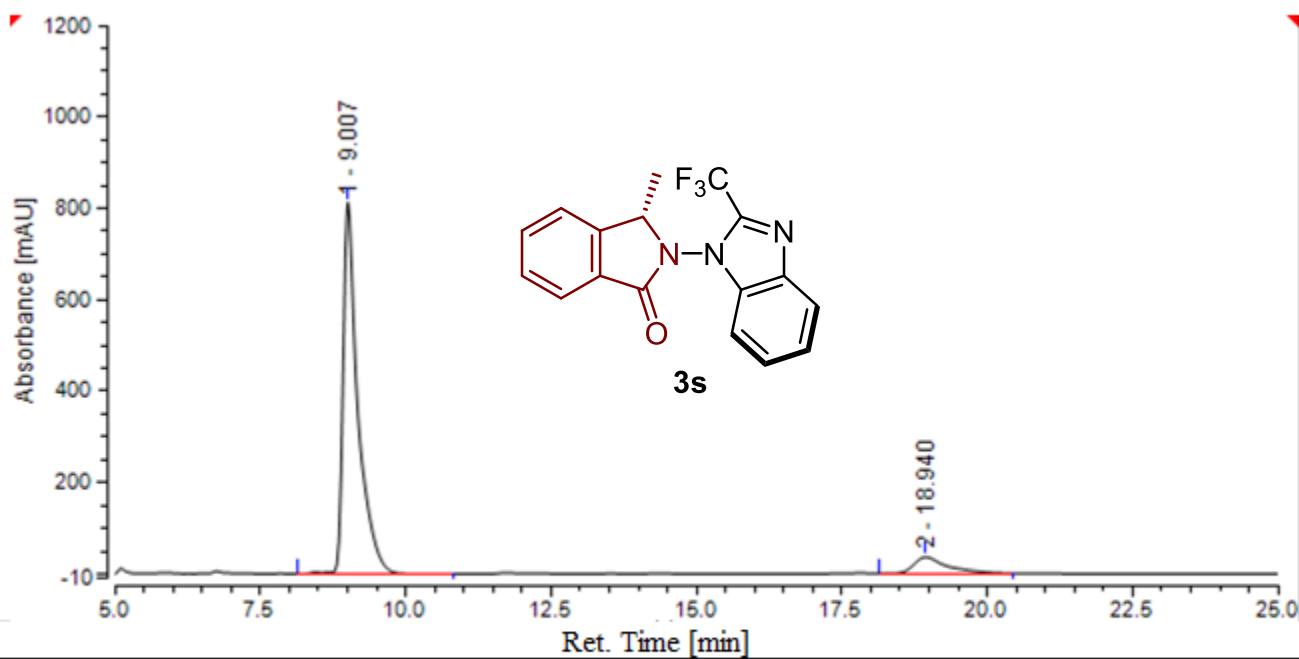

| Peak | Ret. Time (min) | Area (mAu*min) | Height (mAu) | Area % | Height % |
|------|-----------------|----------------|--------------|--------|----------|
| 1    | 9.01            | 238.787        | 812.691      | 91.00  | 95.79    |
| 2    | 18.94           | 23.602         | 35.724       | 9.00   | 4.21     |

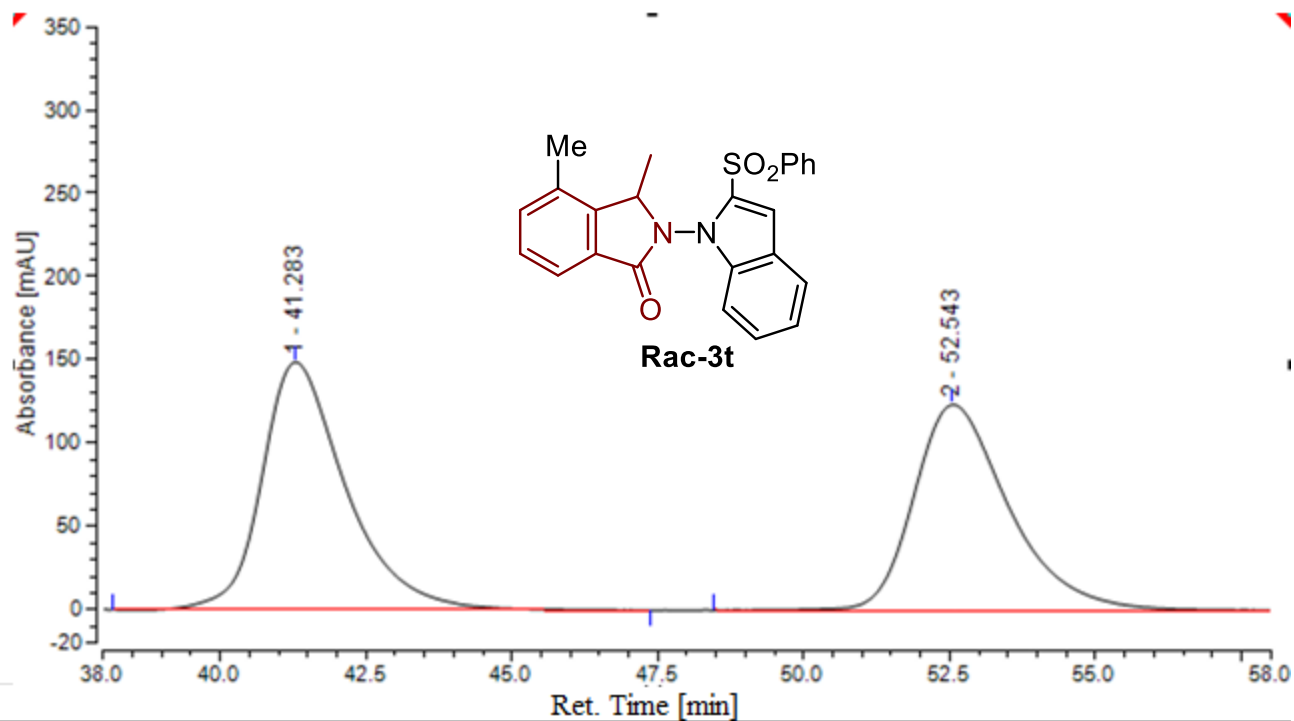

| Peak | Ret. Time (min) | Area (mAu*min) | Height (mAu) | Area % | Height % |
|------|-----------------|----------------|--------------|--------|----------|
| 1    | 41.28           | 248.288        | 148.596      | 51.66  | 54.66    |
| 2    | 52.54           | 232.304        | 123.283      | 48.34  | 45.34    |

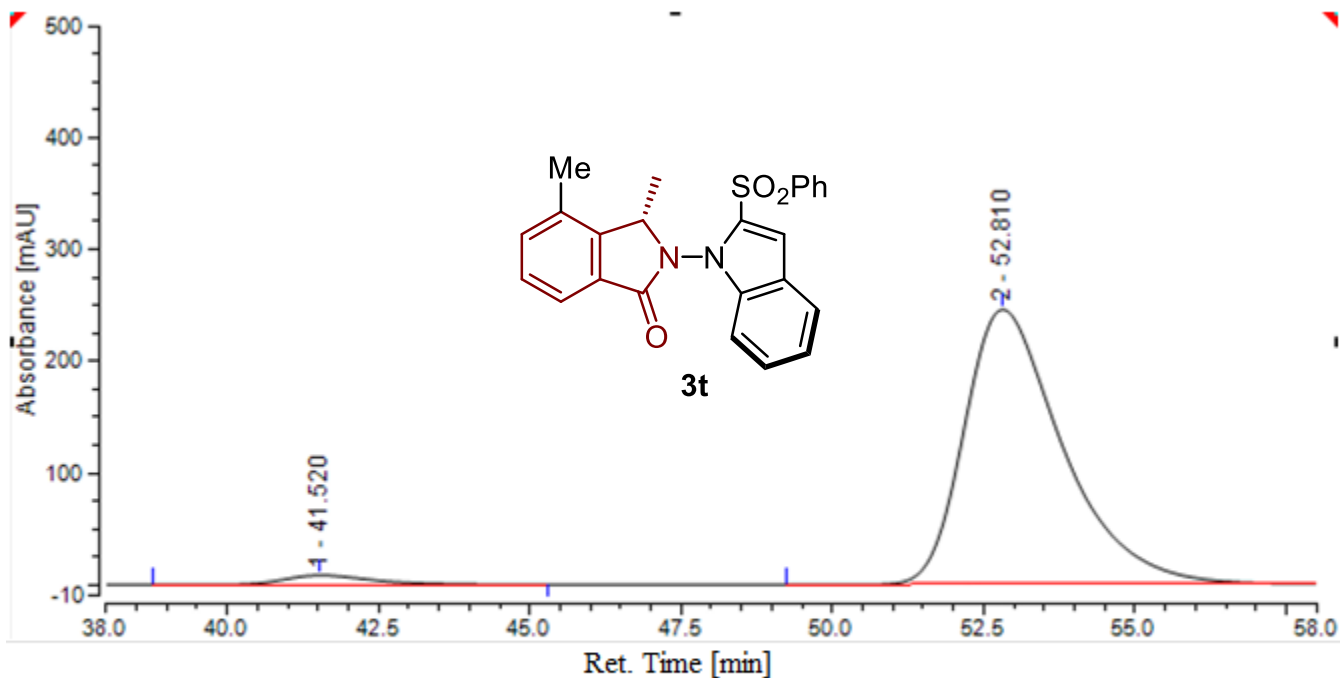

| Peak | Ret. Time (min) | Area (mAu*min) | Height (mAu) | Area % | Height % |
|------|-----------------|----------------|--------------|--------|----------|
| 1    | 41.52           | 14.050         | 8.382        | 2.94   | 3.30     |
| 2    | 52.81           | 464.196        | 245.761      | 97.06  | 96.70    |

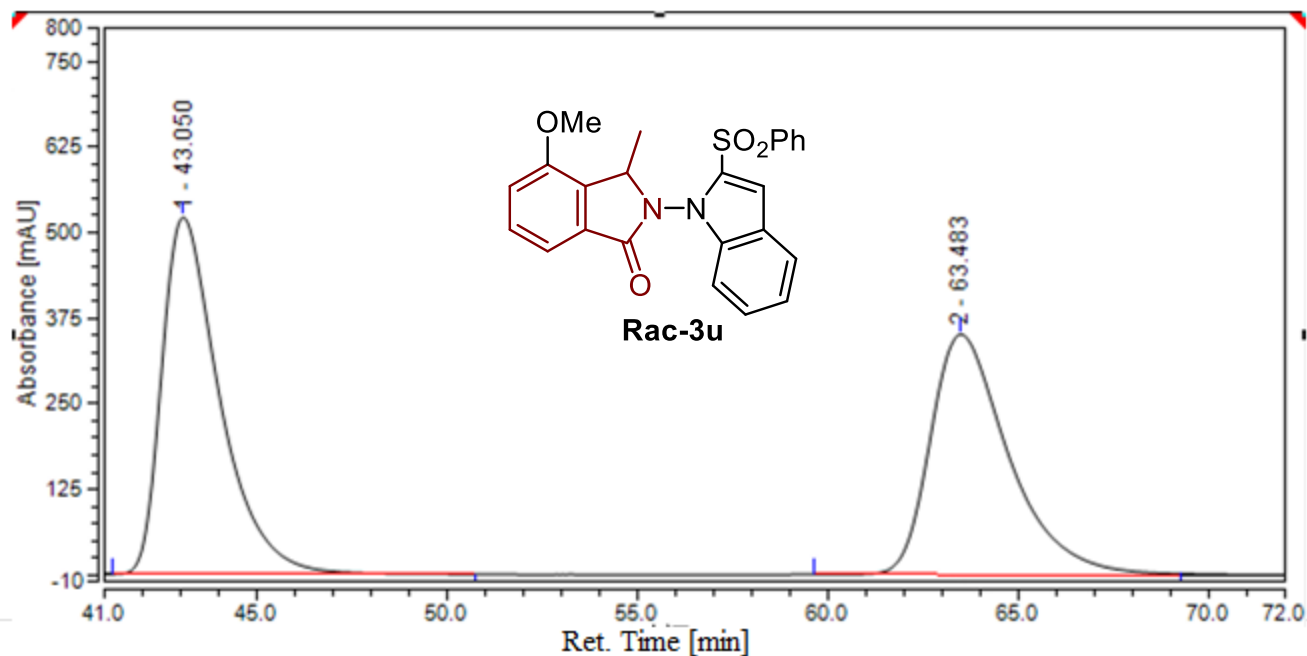

| Peak | Ret. Time (min) | Area (mAu*min) | Height (mAu) | Area % | Height % |
|------|-----------------|----------------|--------------|--------|----------|
| 1    | 43.05           | 923.167        | 521.510      | 53.49  | 59.77    |
| 2    | 63.48           | 835.532        | 350.956      | 47.51  | 40.23    |

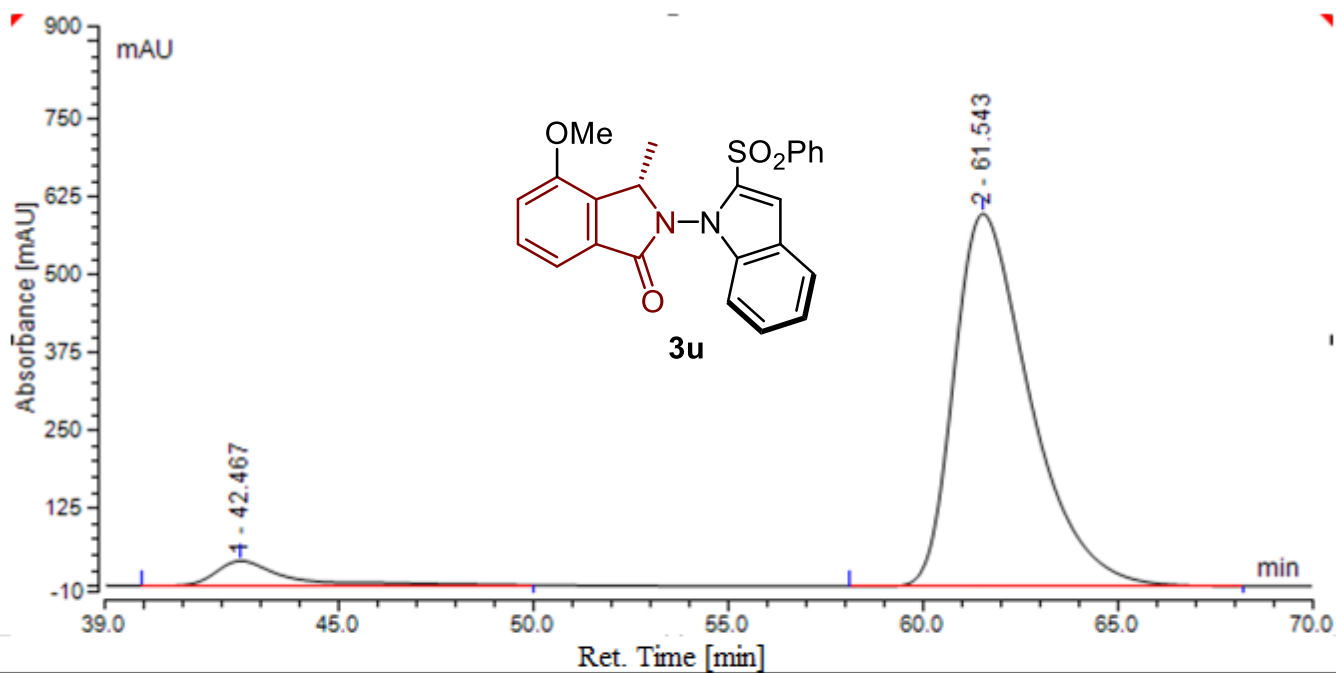

| Peak | Ret. Time (min) | Area (mAu*min) | Height (mAu) | Area % | Height % |
|------|-----------------|----------------|--------------|--------|----------|
| 1    | 42.47           | 84.156         | 39.773       | 5.88   | 6.23     |
| 2    | 61.54           | 1347 885       | 598.282      | 94.12  | 93.77    |

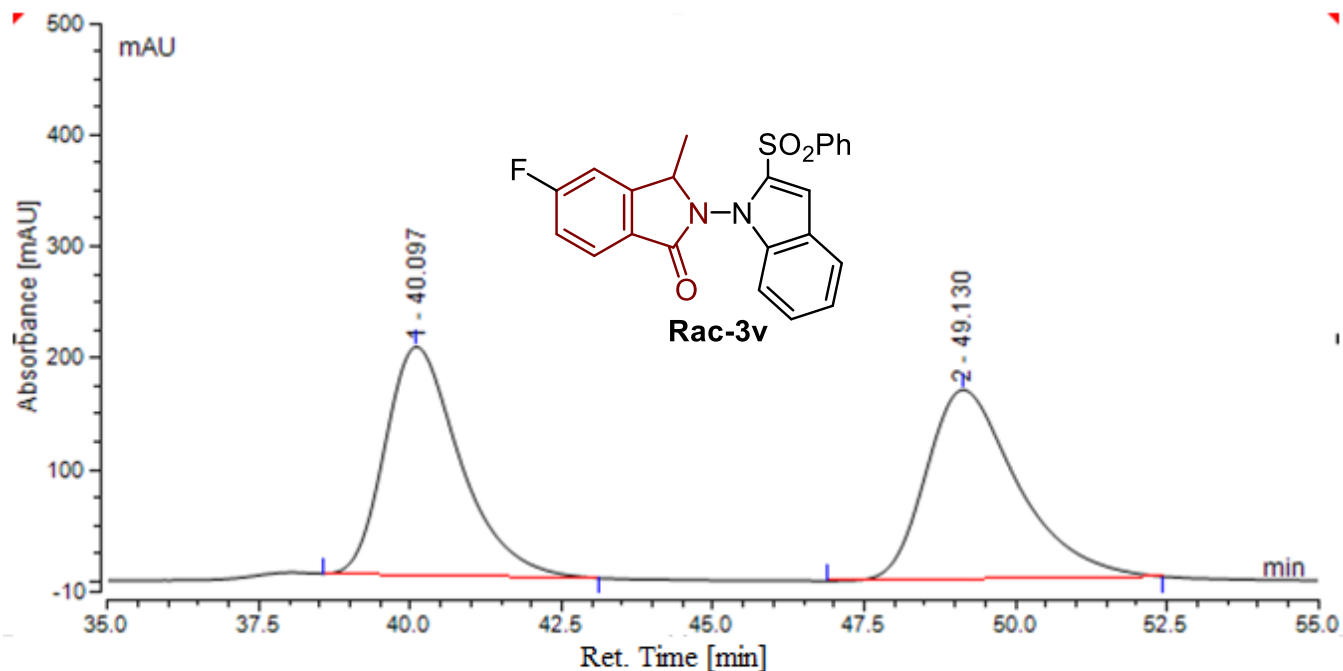

| Peak | Ret. Time (min) | Area (mAu*min) | Height (mAu) | Area % | Height % |
|------|-----------------|----------------|--------------|--------|----------|
| 1    | 40.10           | 294.127        | 204.682      | 49.78  | 54.69    |
| 2    | 49.13           | 296.699        | 169.570      | 50.22  | 45.31    |

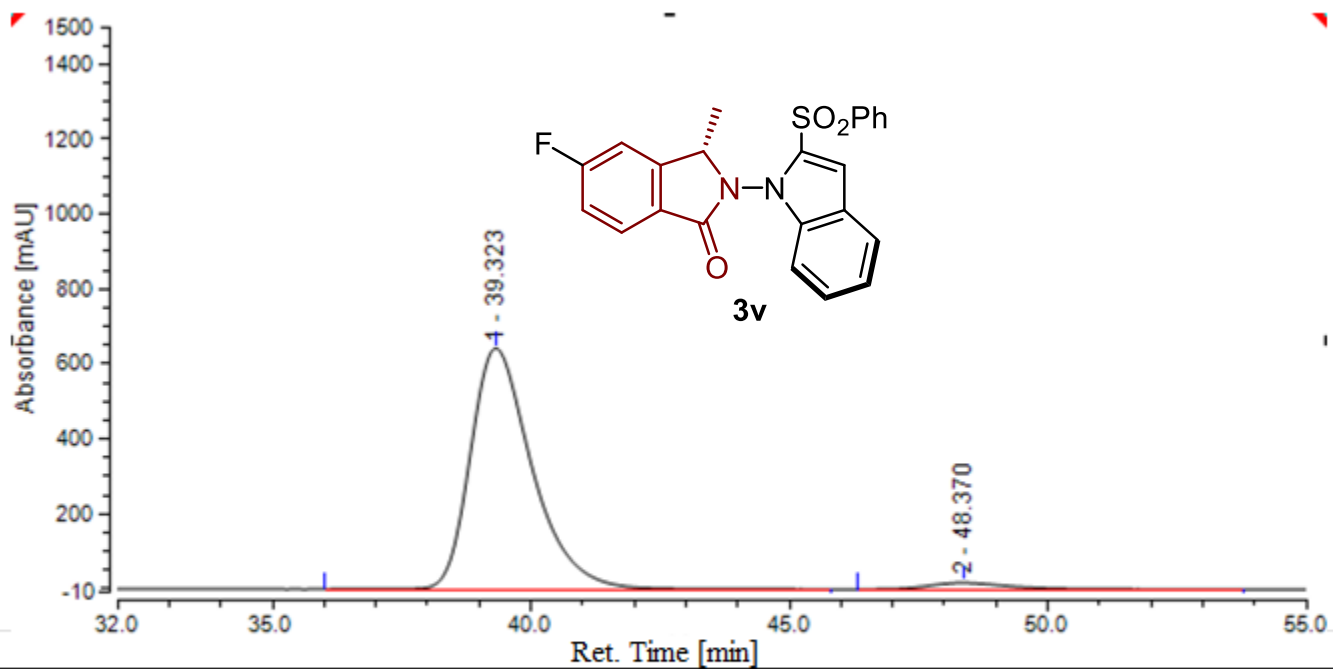

| Peak | Ret. Time (min) | Area (mAu*min) | Height (mAu) | Area % | Height % |
|------|-----------------|----------------|--------------|--------|----------|
| 1    | 39.32           | 889.214        | 643.104      | 96.74  | 97.44    |
| 2    | 48.37           | 29.996         | 16.921       | 3.26   | 2.56     |

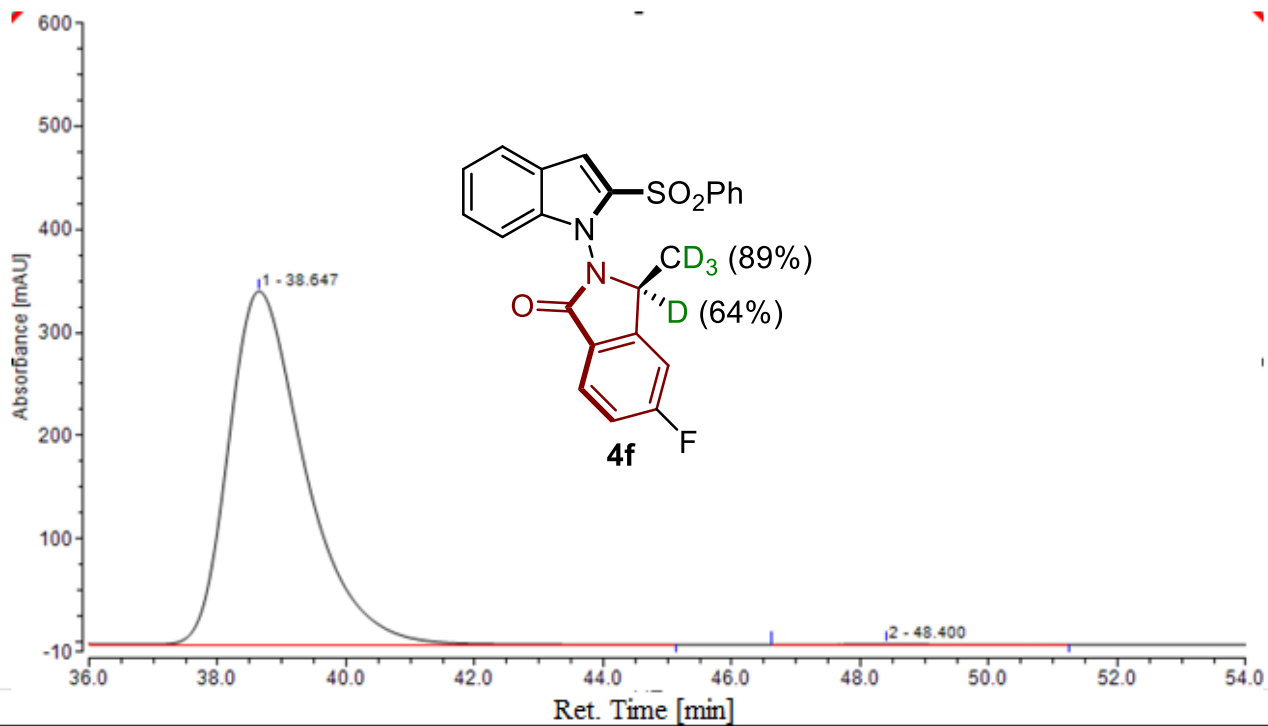

| Peak | Ret. Time (min) | Area (mAu*min) | Height (mAu) | Area % | Height % |
|------|-----------------|----------------|--------------|--------|----------|
| 1    | 38.65           | 470.876        | 342.525      | 99.89  | 99.92    |
| 2    | 45.40           | 0.503          | 0.267        | 0.11   | 0.08     |

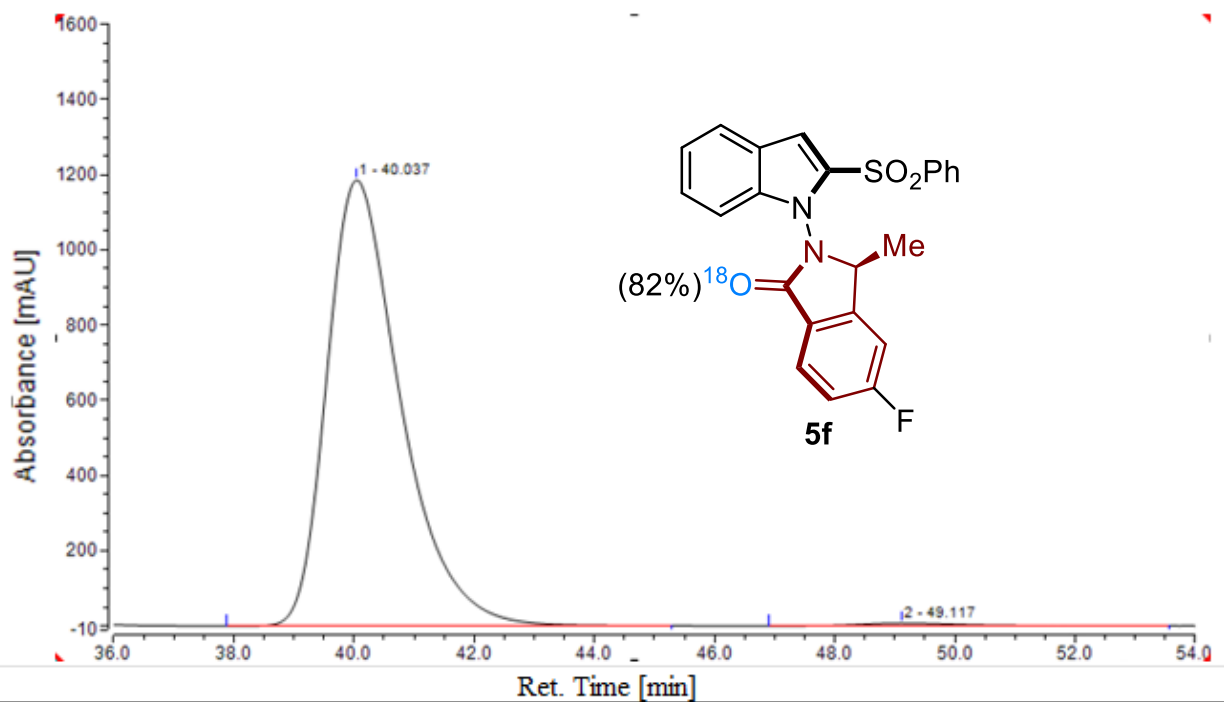

| Peak | Ret. Time (min) | Area (mAu*min) | Height (mAu) | Area % | Height % |
|------|-----------------|----------------|--------------|--------|----------|
| 1    | 40.04           | 1681.783       | 1185.105     | 99.21  | 99.40    |
| 2    | 49.12           | 13.341         | 7.116        | 0.79   | 0.60     |

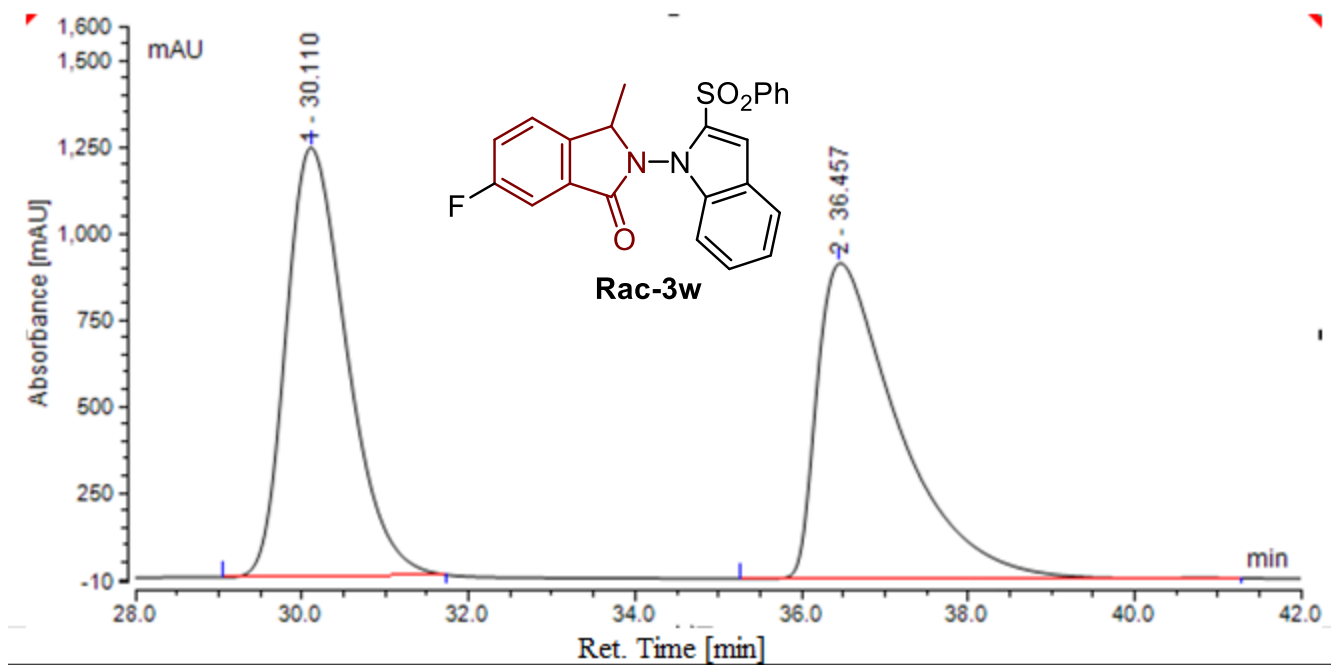

| Peak | Ret. Time (min) | Area (mAu*min) | Height (mAu) | Area % | Height % |
|------|-----------------|----------------|--------------|--------|----------|
| 1    | 30.11           | 1043.754       | 1240.322     | 50.32  | 57.62    |
| 2    | 36.46           | 1030.470       | 912.443      | 49.68  | 42.38    |

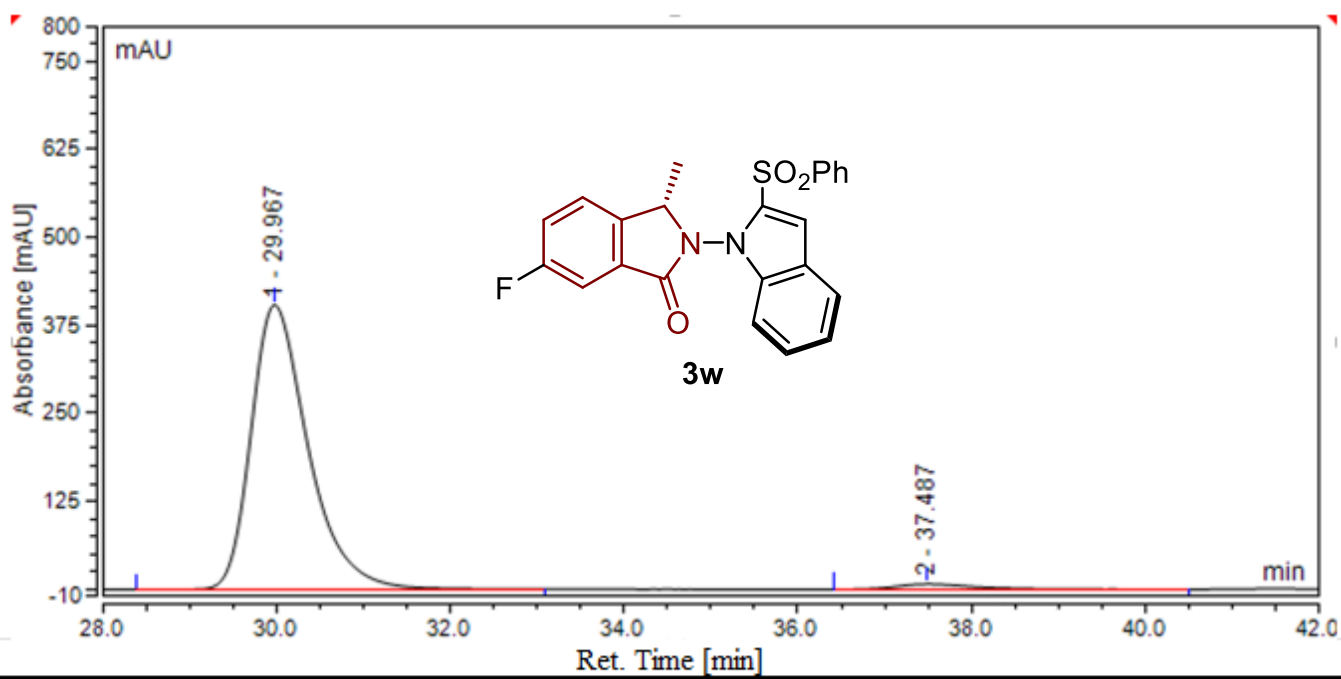

| Peak | Ret. Time (min) | Area (mAu*min) | Height (mAu) | Area % | Height % |
|------|-----------------|----------------|--------------|--------|----------|
| 1    | 29.97           | 306.996        | 403.867      | 97.41  | 98.17    |
| 2    | 37.49           | 8.176          | 7.515        | 2.59   | 1.83     |



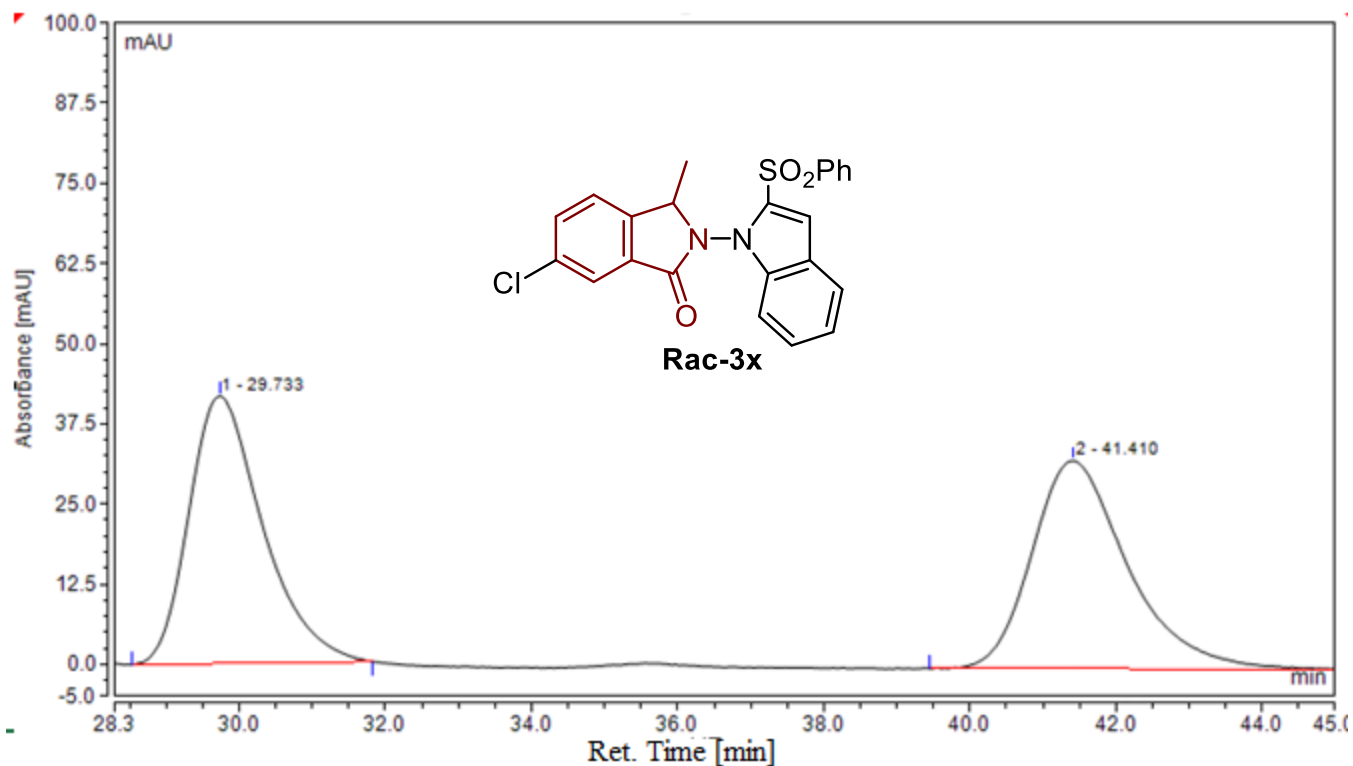

| Peak | Ret. Time (min) | Area (mAu*min) | Height (mAu) | Area % | Height % |
|------|-----------------|----------------|--------------|--------|----------|
| 1    | 29.73           | 48.830         | 41.766       | 49.84  | 56.29    |
| 2    | 41.41           | 49.141         | 32.436       | 50.16  | 43.71    |

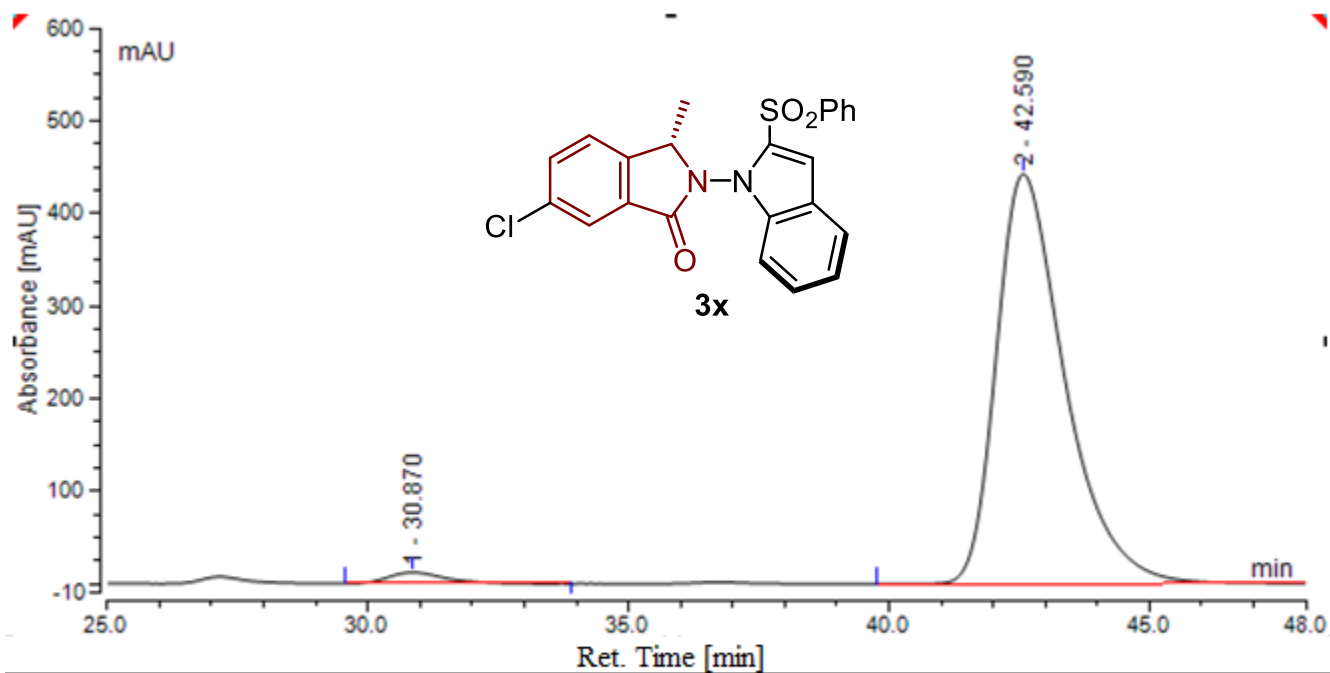

| Peak | Ret. Time (min) | Area (mAu*min) | Height (mAu) | Area % | Height % |
|------|-----------------|----------------|--------------|--------|----------|
| 1    | 30.87           | 14.810         | 11.895       | 2.16   | 2.62     |
| 2    | 42.59           | 671.425        | 441.914      | 97.84  | 97.38    |

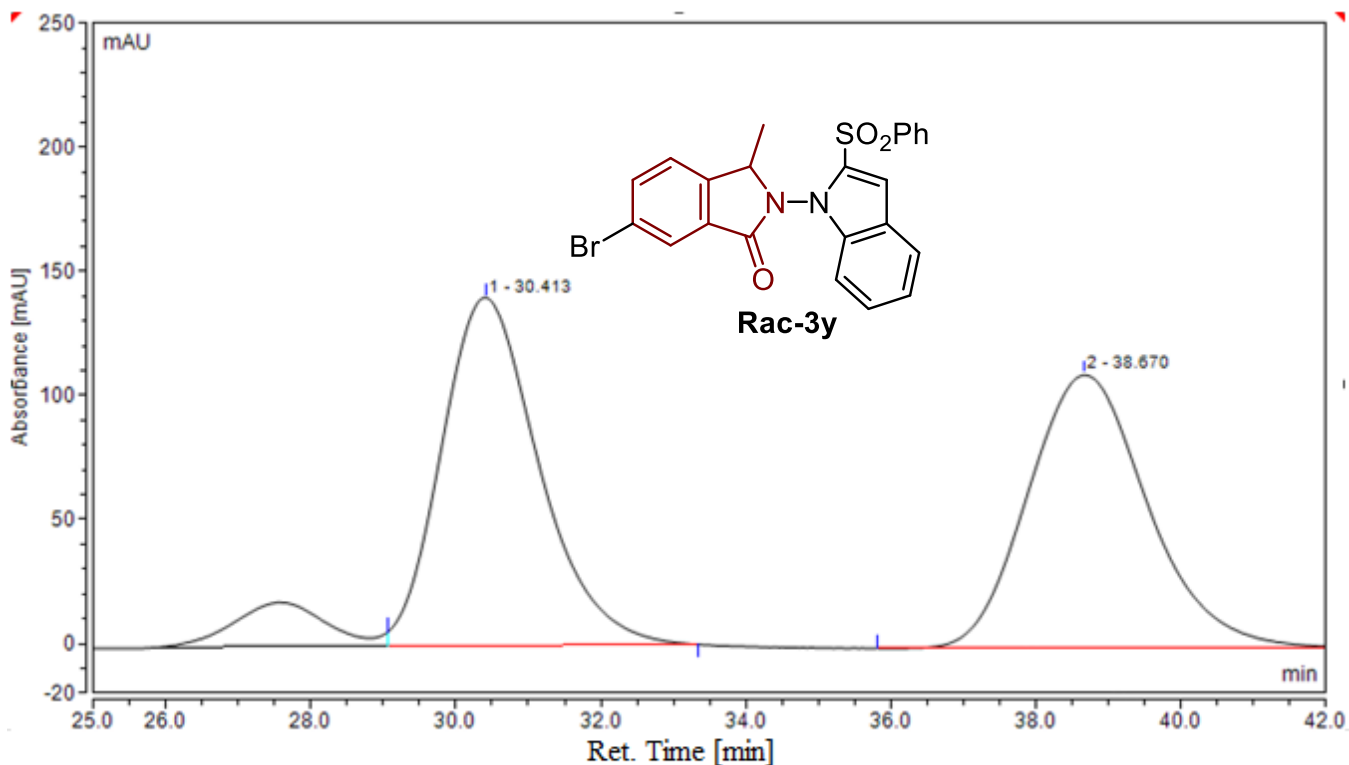

| Peak | Ret. Time (min) | Area (mAu*min) | Height (mAu) | Area % | Height % |
|------|-----------------|----------------|--------------|--------|----------|
| 1    | 30.41           | 217.582        | 140.191      | 50.79  | 56.02    |
| 2    | 38.67           | 210.832        | 110.059      | 49.21  | 43.98    |

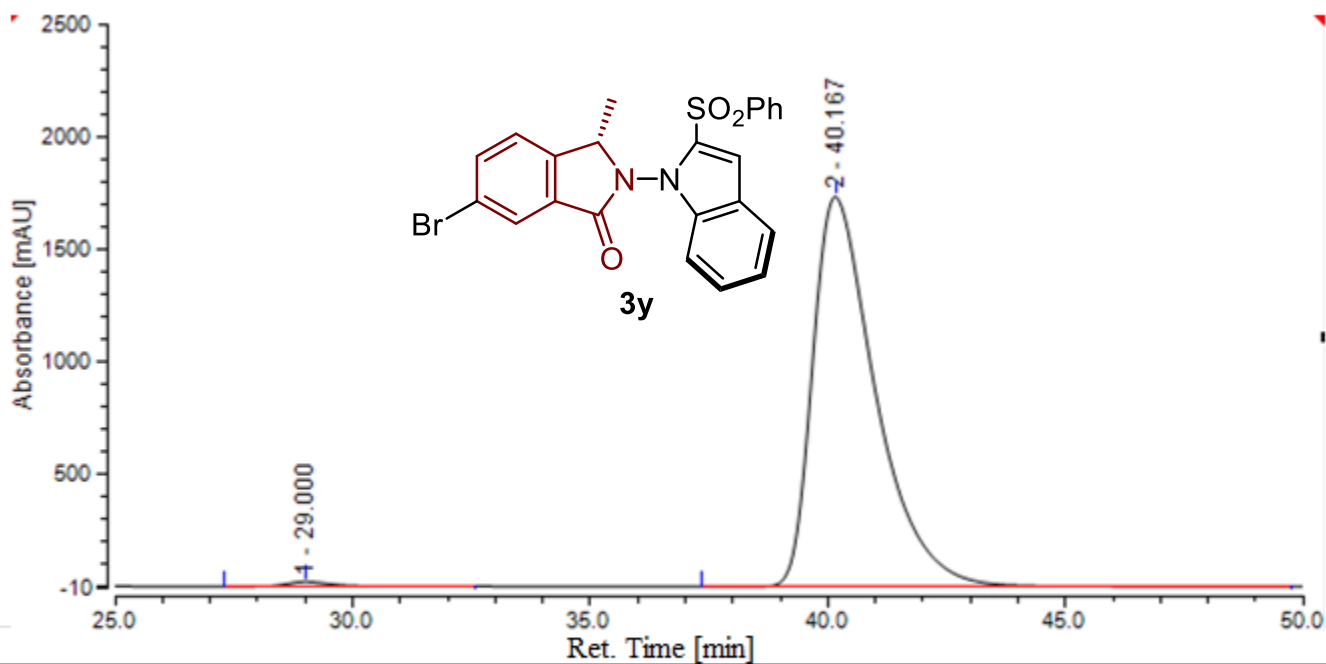

| Peak | Ret. Time (min) | Area (mAu*min) | Height (mAu) | Area % | Height % |
|------|-----------------|----------------|--------------|--------|----------|
| 1    | 29.00           | 23.881         | 21.235       | 0.89   | 1.21     |
| 2    | 40.17           | 2651.331       | 1733.410     | 99.11  | 98.79    |

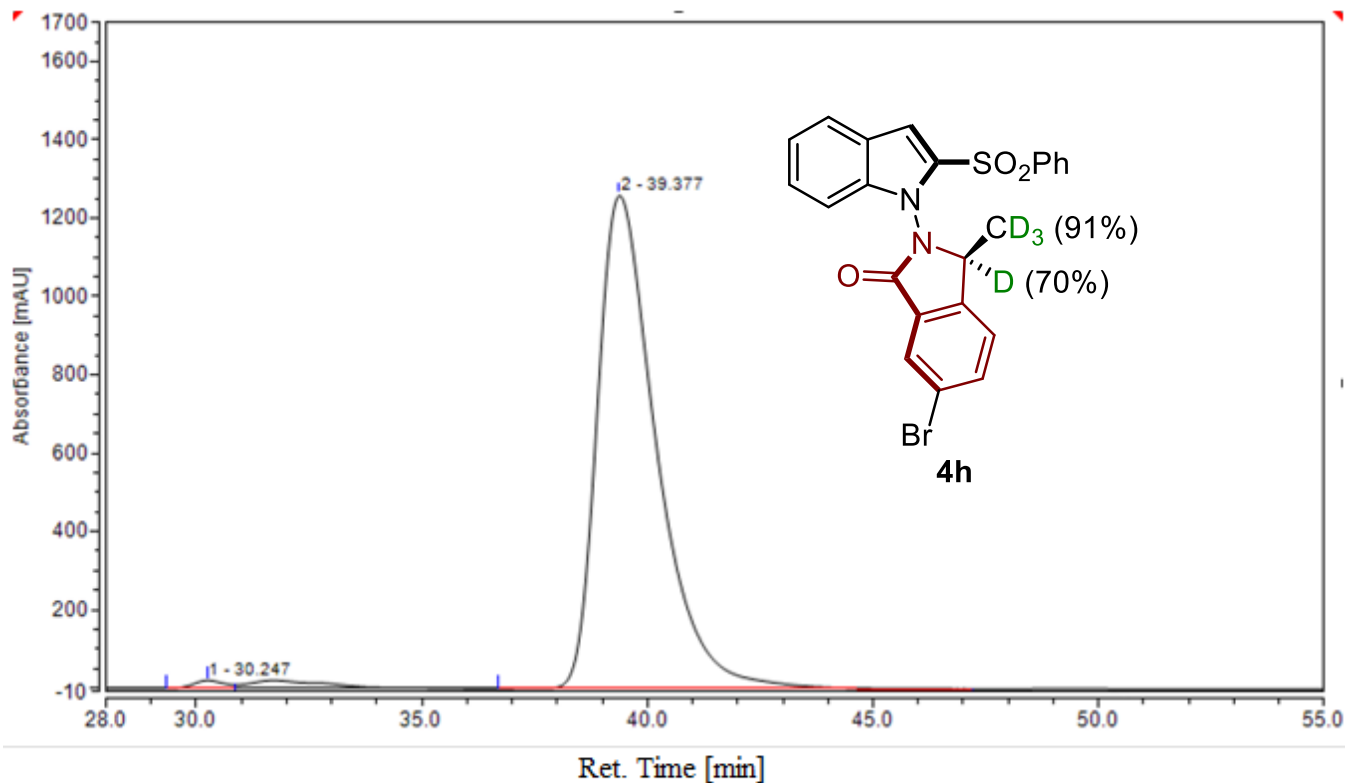

| Peak | Ret. Time (min) | Area (mAu*min) | Height (mAu) | Area % | Height % |
|------|-----------------|----------------|--------------|--------|----------|
| 1    | 30.25           | 16.677         | 20.565       | 0.87   | 1.61     |
| 2    | 39.38           | 1904.451       | 1259.701     | 99.13  | 98.39    |

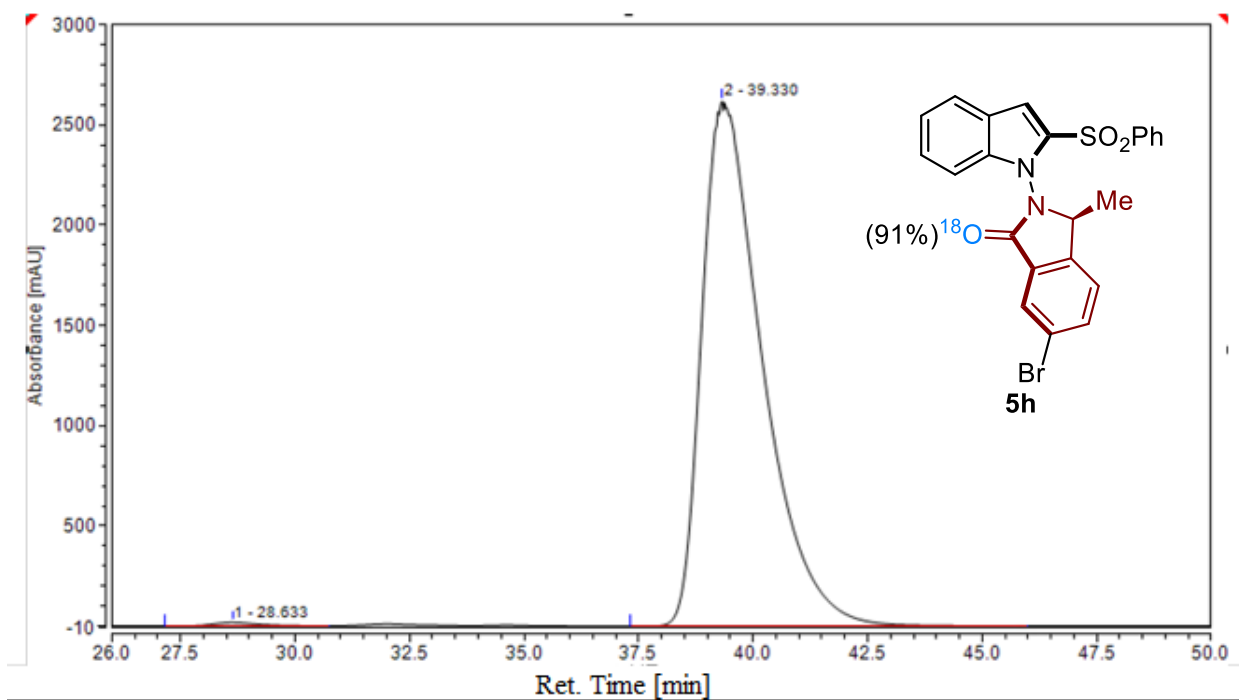

| Peak | Ret. Time (min) | Area (mAu*min) | Height (mAu) | Area % | Height % |
|------|-----------------|----------------|--------------|--------|----------|
| 1    | 28.63           | 19.999         | 17.262       | 0.50   | 0.66     |
| 2    | 39.33           | 4000.542       | 2618.140     | 99.50  | 99.34    |

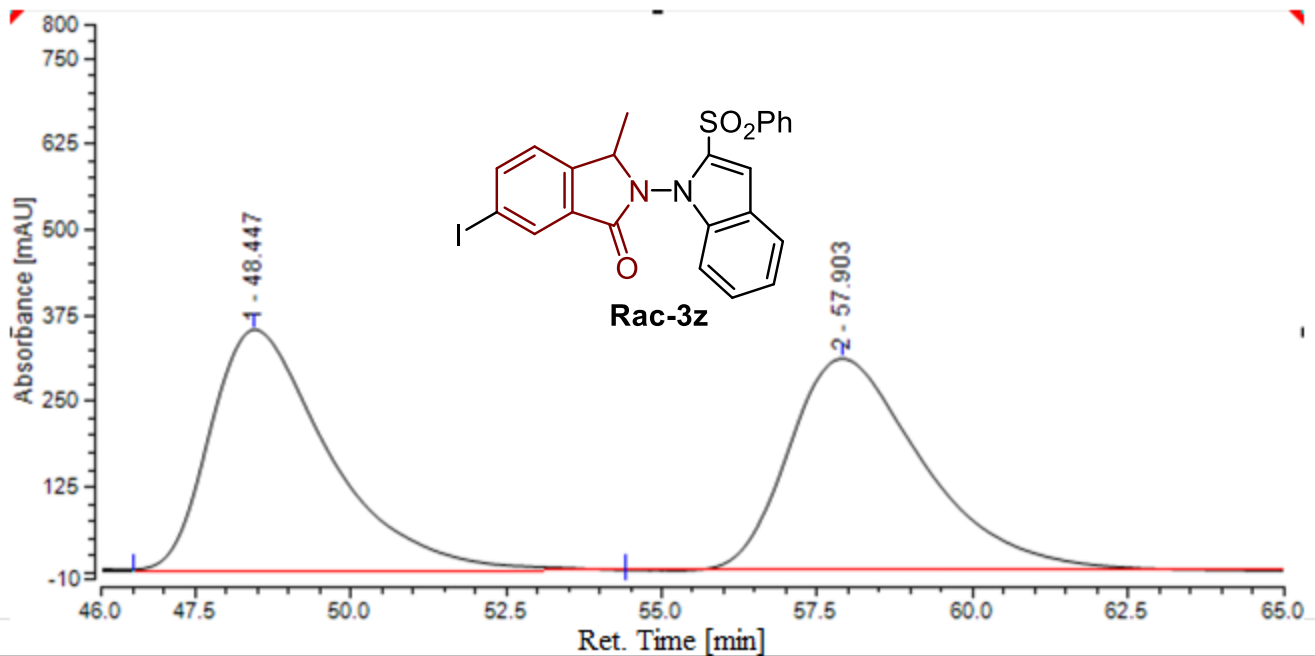

| Peak | Ret. Time (min) | Area (mAu*min) | Height (mAu) | Area % | Height % |
|------|-----------------|----------------|--------------|--------|----------|
| 1    | 48.45           | 780.109        | 352.186      | 50.25  | 53.31    |
| 2    | 57.90           | 763.124        | 308.424      | 49.45  | 46.69    |

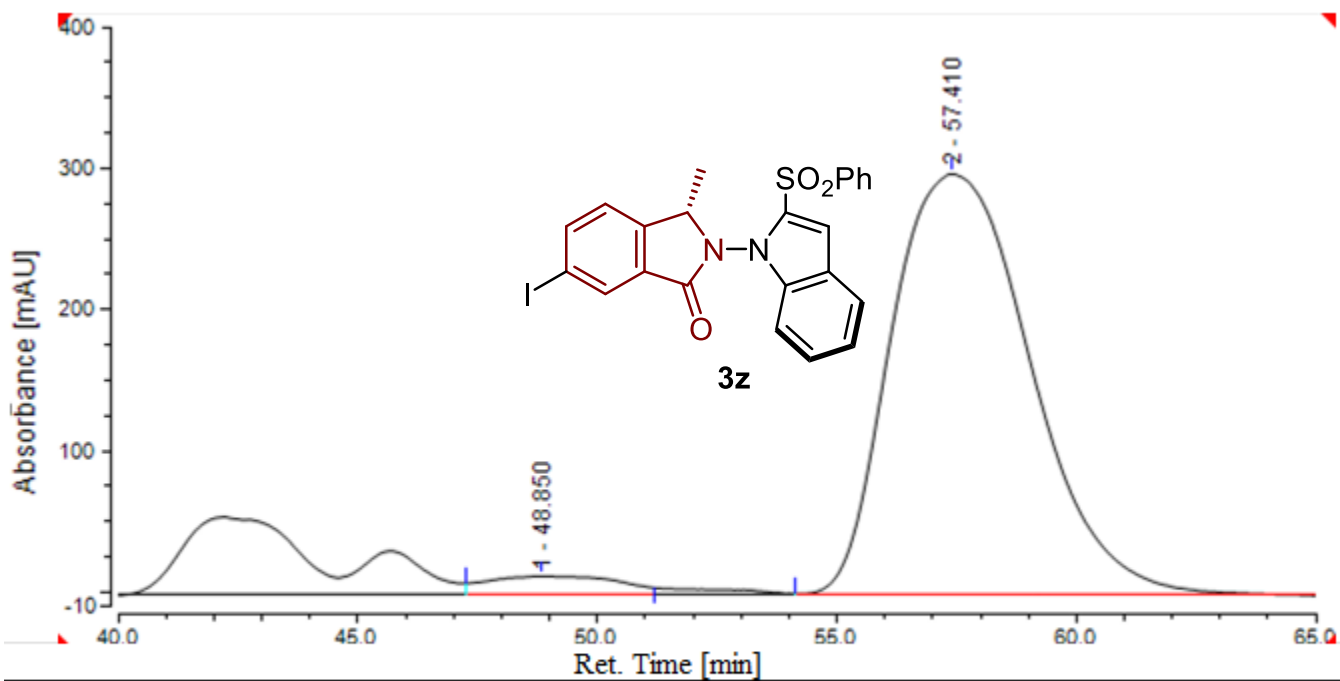

| Peak | Ret. Time (min) | Area (mAu*min) | Height (mAu) | Area % | Height % |
|------|-----------------|----------------|--------------|--------|----------|
| 1    | 48.85           | 43.368         | 13.591       | 4.14   | 4.36     |
| 2    | 57.41           | 1004.391       | 298.065      | 95.86  | 95.64    |

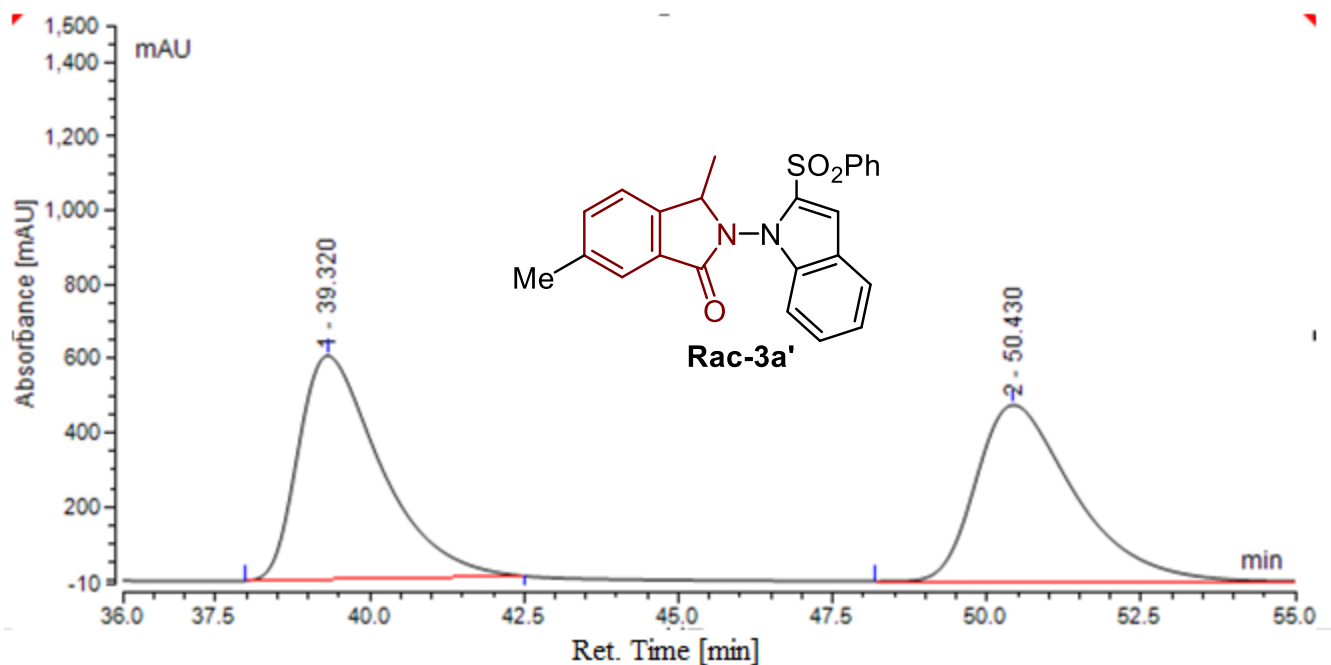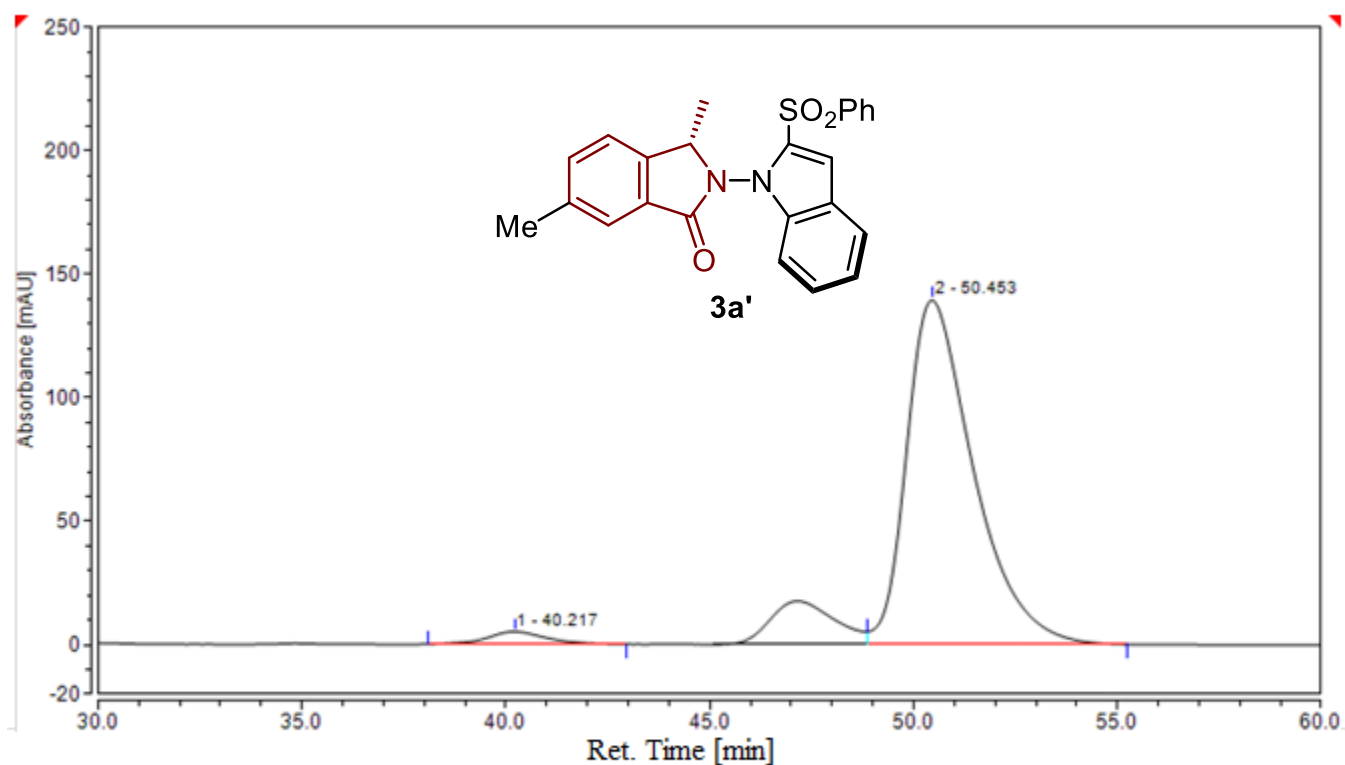

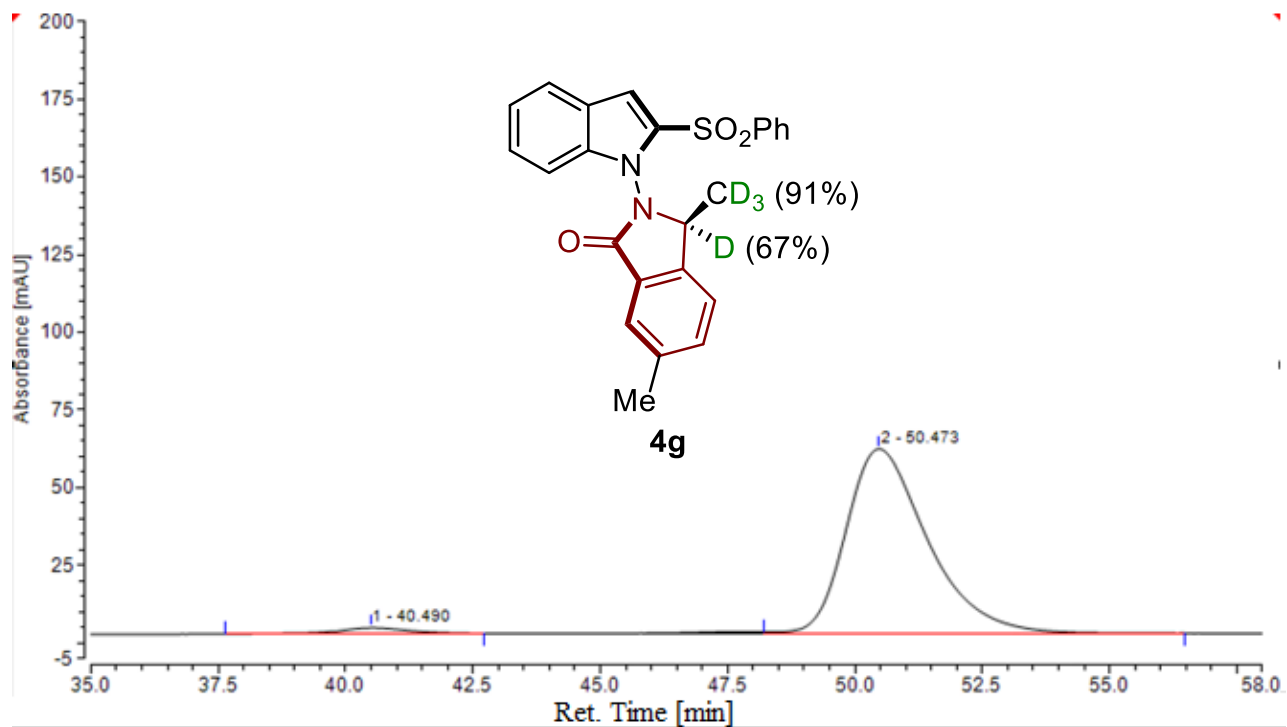

| Peak | Ret. Time (min) | Area (mAu*min) | Height (mAu) | Area % | Height % |
|------|-----------------|----------------|--------------|--------|----------|
| 1    | 40.49           | 2.967          | 1.840        | 2.63   | 3.01     |
| 2    | 50.47           | 110.012        | 59.296       | 97.37  | 96.99    |

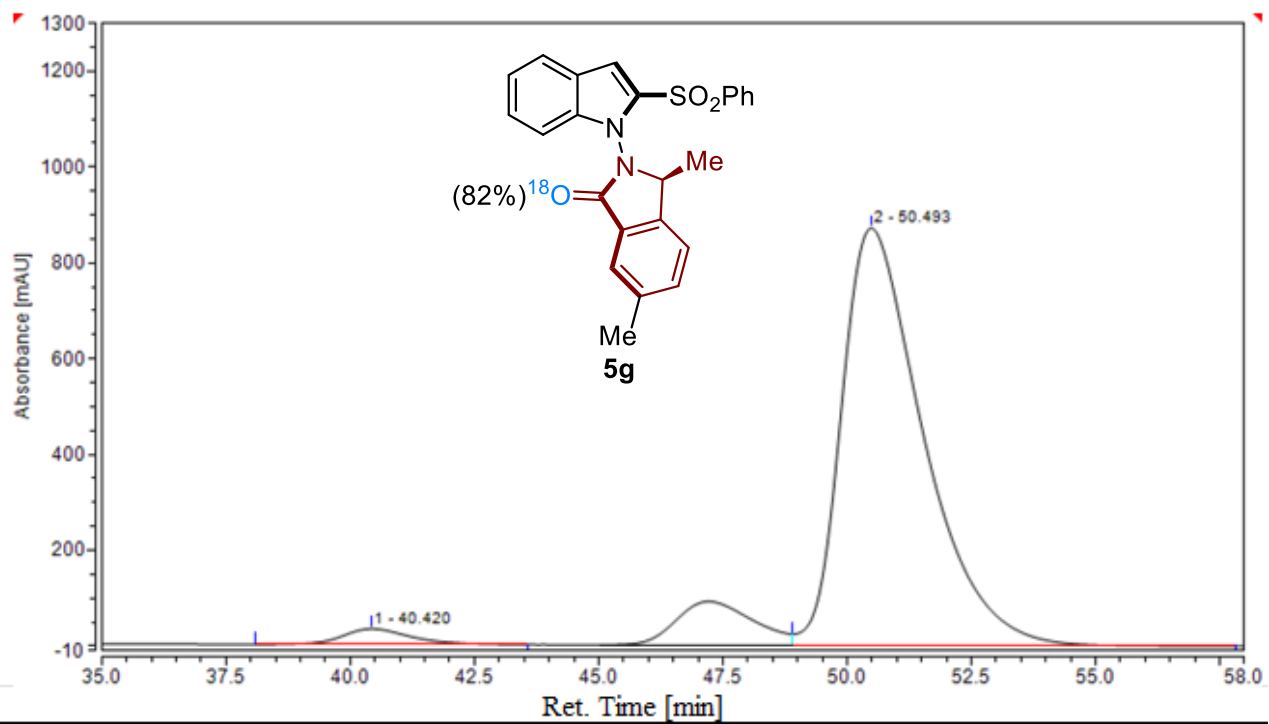

| Peak | Ret. Time (min) | Area (mAu*min) | Height (mAu) | Area % | Height % |
|------|-----------------|----------------|--------------|--------|----------|
| 1    | 40.42           | 52.762         | 32.777       | 3.09   | 3.63     |
| 2    | 50.49           | 1653.888       | 871.207      | 96.91  | 96.37    |

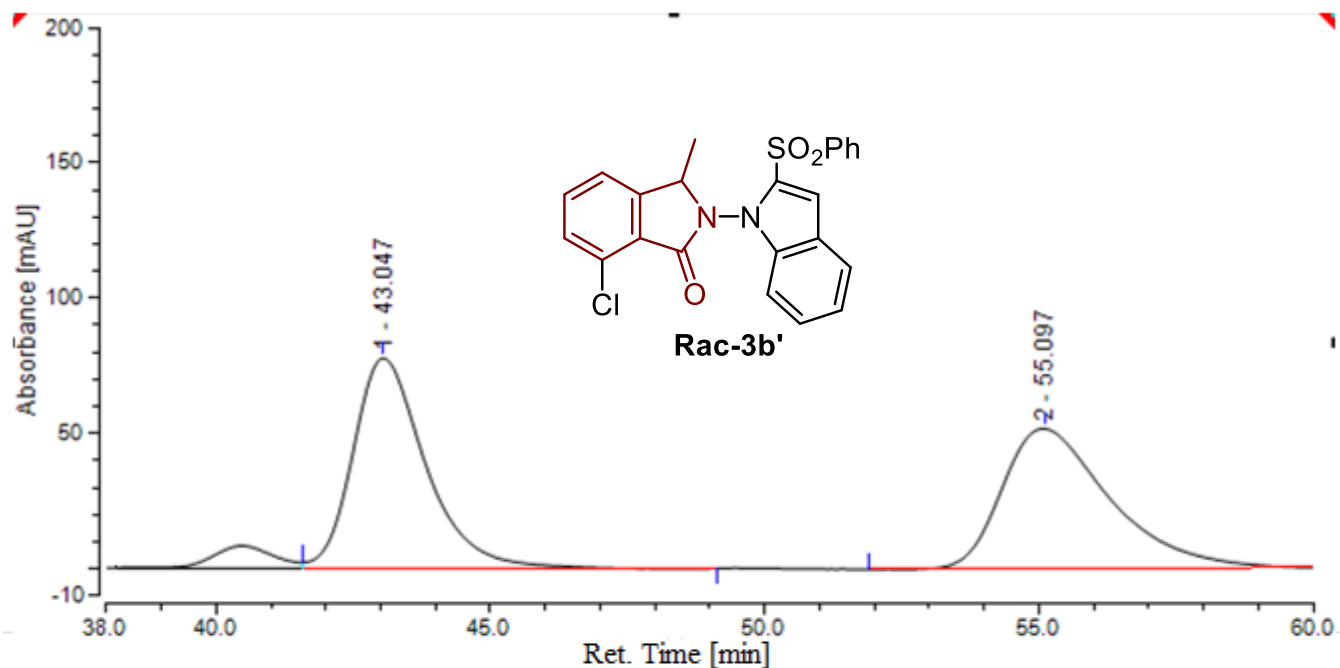

| Peak | Ret. Time (min) | Area (mAu*min) | Height (mAu) | Area % | Height % |
|------|-----------------|----------------|--------------|--------|----------|
| 1    | 43.05           | 118 394        | 77.546       | 50.23  | 59.98    |
| 2    | 55.10           | 117.327        | 51.746       | 49.77  | 40.02    |

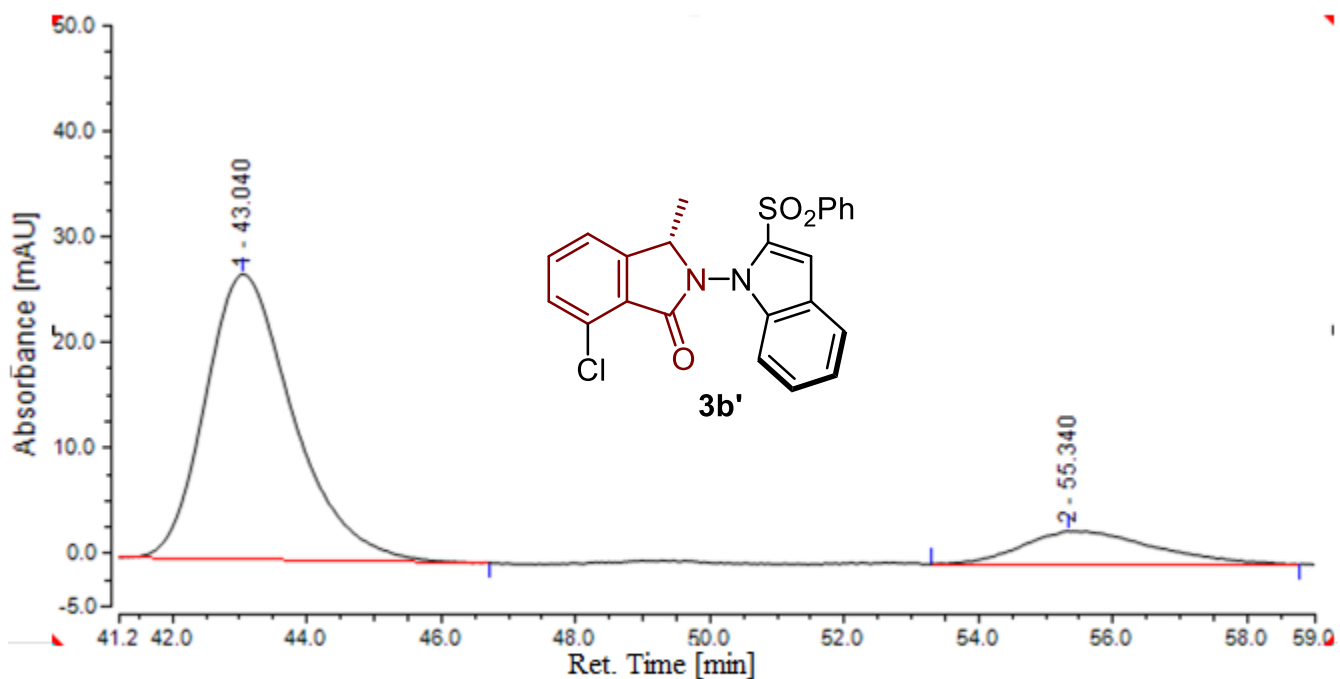

| Peak | Ret. Time (min) | Area (mAu*min) | Height (mAu) | Area % | Height % |
|------|-----------------|----------------|--------------|--------|----------|
| 1    | 43.04           | 40.777         | 26.976       | 85.14  | 89.47    |
| 2    | 55.34           | 7.116          | 3.176        | 14.86  | 10.53    |

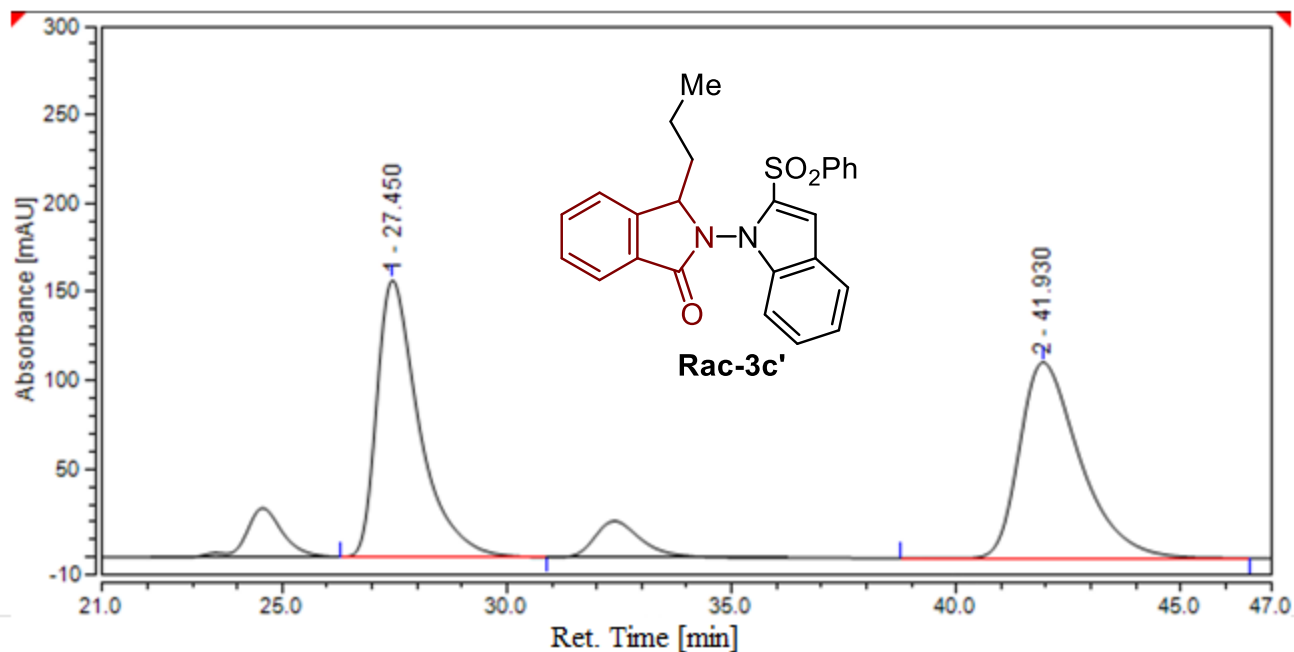

| Peak | Ret. Time (min) | Area (mAu*min) | Height (mAu) | Area % | Height % |
|------|-----------------|----------------|--------------|--------|----------|
| 1    | 27.45           | 171.243        | 156.623      | 49.80  | 58.61    |
| 2    | 41.93           | 172.645        | 110.622      | 50.20  | 41.39    |

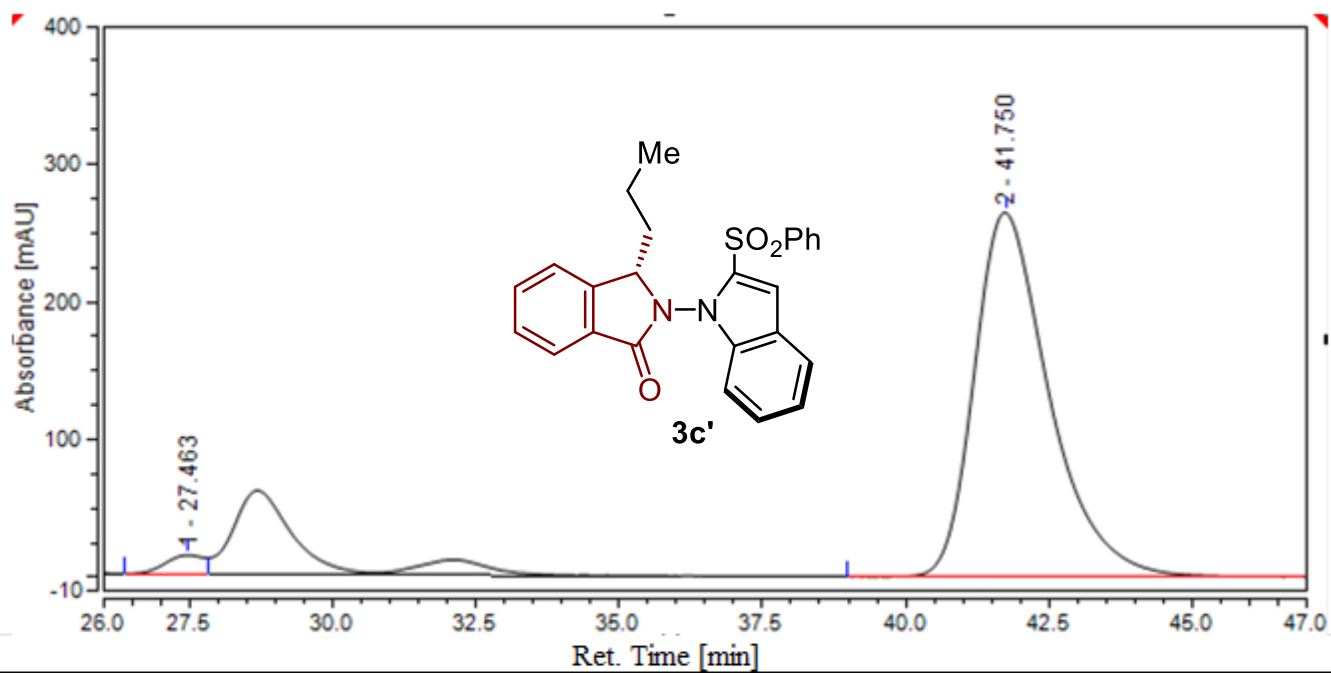

| Peak | Ret. Time (min) | Area (mAu*min) | Height (mAu) | Area % | Height % |
|------|-----------------|----------------|--------------|--------|----------|
| 1    | 27.46           | 11.547         | 14.171       | 2.81   | 5.09     |
| 2    | 41.75           | 399.032        | 264.164      | 97.19  | 94.91    |



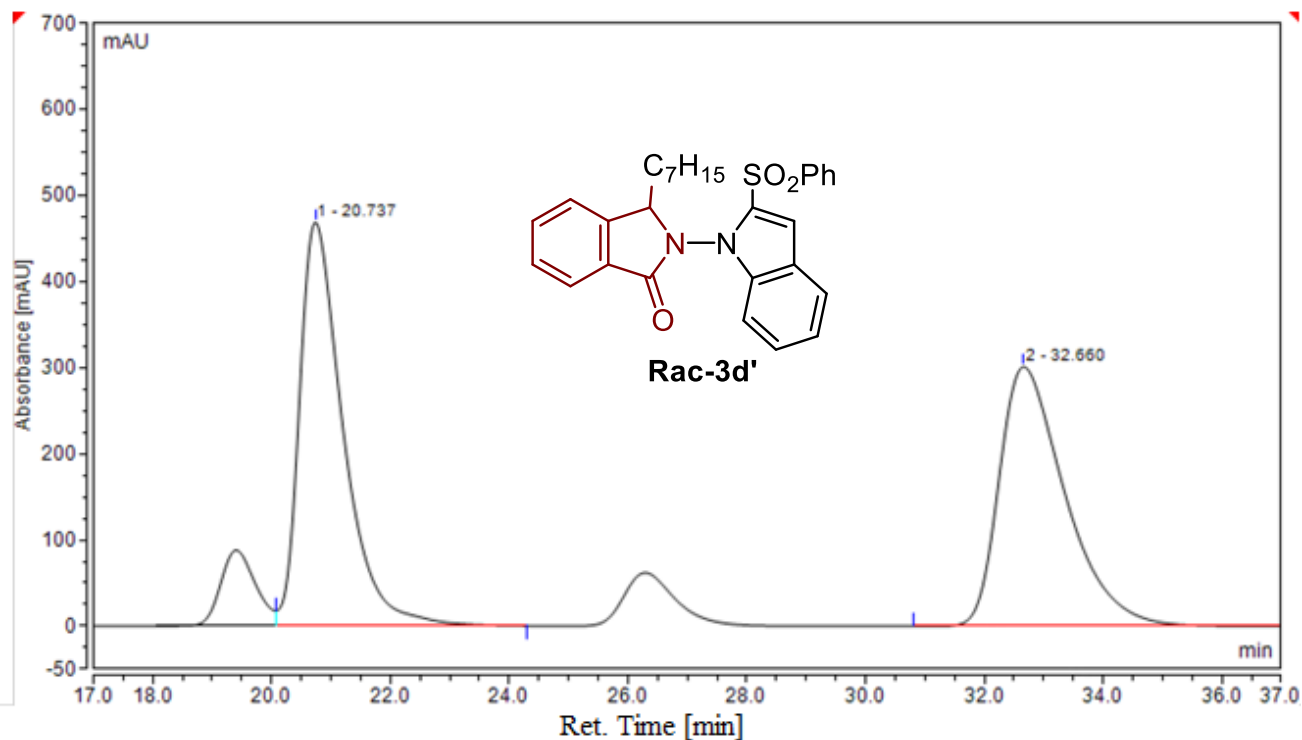

| Peak | Ret. Time (min) | Area (mAu*min) | Height (mAu) | Area % | Height % |
|------|-----------------|----------------|--------------|--------|----------|
| 1    | 20.74           | 397.626        | 468.794      | 50.78  | 60.89    |
| 2    | 32.66           | 385.359        | 301.056      | 49.22  | 39.11    |

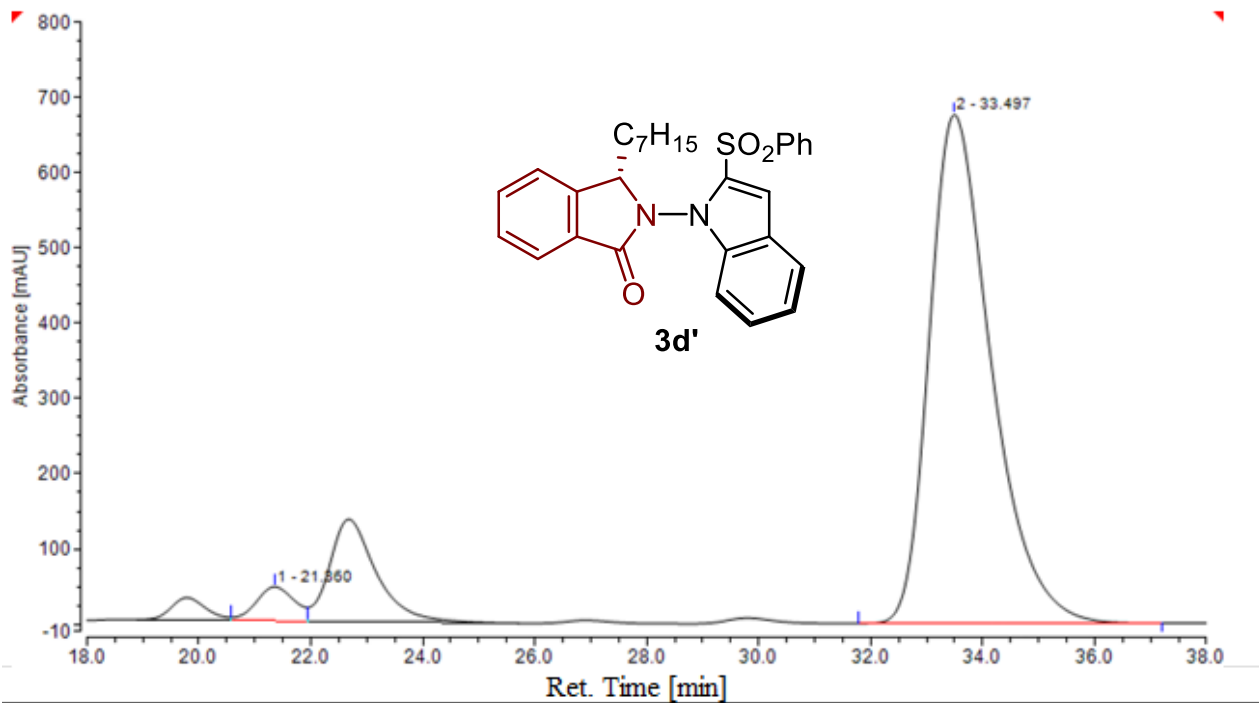

| Peak | Ret. Time (min) | Area (mAu*min) | Height (mAu) | Area % | Height % |
|------|-----------------|----------------|--------------|--------|----------|
| 1    | 21.36           | 36.059         | 45.410       | 4.00   | 6.29     |
| 2    | 33.50           | 865.375        | 676.327      | 96.00  | 93.71    |

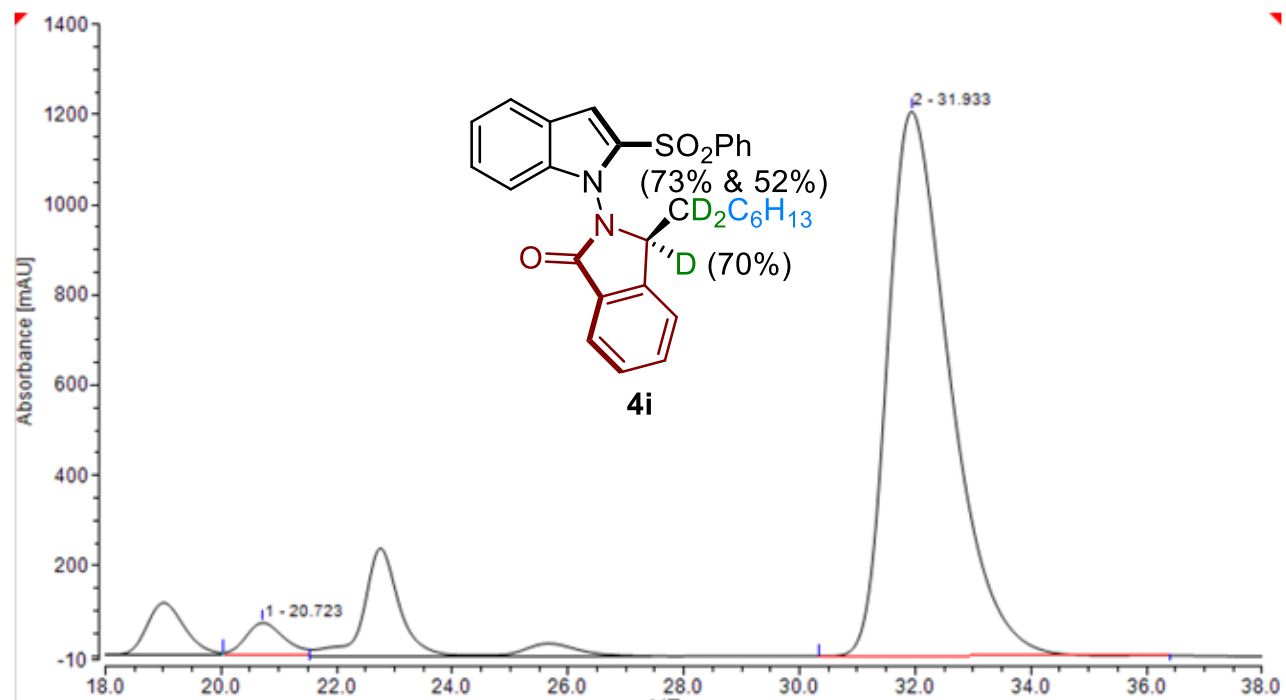

| Peak | Ret. Time (min) | Area (mAu*min) | Height (mAu) | Area % | Height % |
|------|-----------------|----------------|--------------|--------|----------|
| 1    | 20.72           | 57.621         | 73.080       | 3.70   | 5.71     |
| 2    | 31.93           | 1498.545       | 1207.498     | 96.30  | 94.29    |

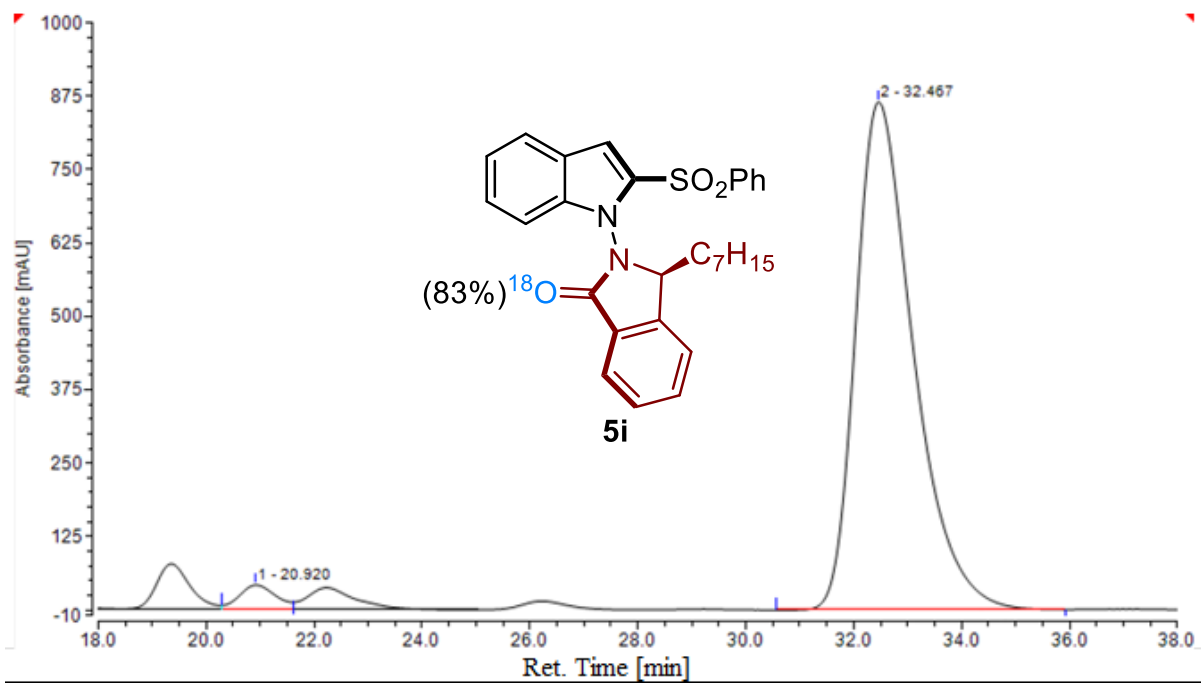

| Peak | Ret. Time (min) | Area (mAu*min) | Height (mAu) | Area % | Height % |
|------|-----------------|----------------|--------------|--------|----------|
| 1    | 20.92           | 32.924         | 41.648       | 2.98   | 4.59     |
| 2    | 32.47           | 1071.239       | 865.622      | 97.02  | 95.41    |

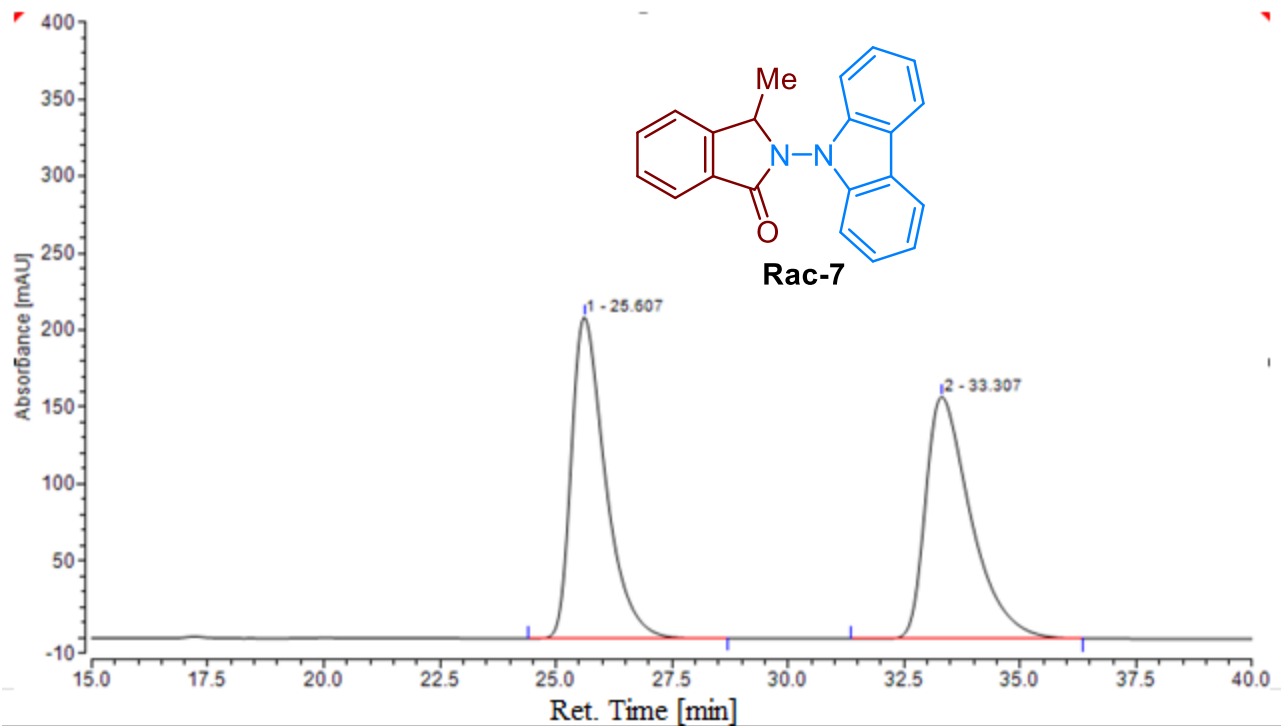

| Peak | Ret. Time (min) | Area (mAu*min) | Height (mAu) | Area % | Height % |
|------|-----------------|----------------|--------------|--------|----------|
| 1    | 25.61           | 177.145        | 208.664      | 49.98  | 57.05    |
| 2    | 33.31           | 177.264        | 157.061      | 50.02  | 42.95    |

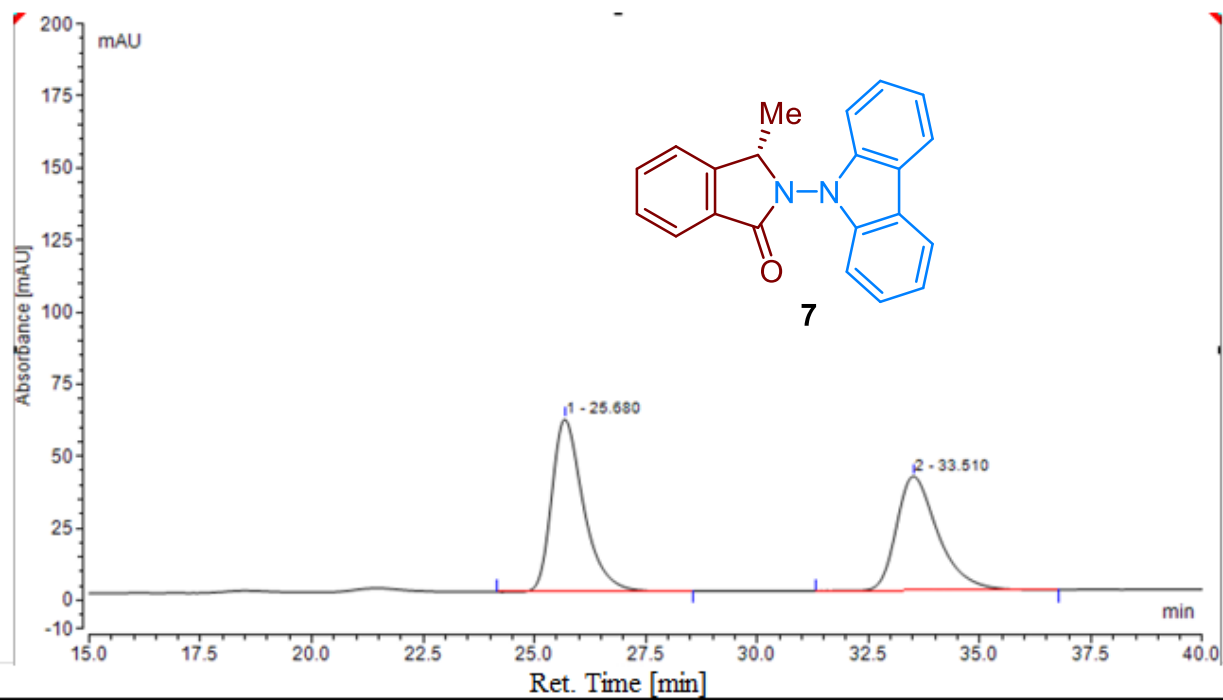

| Peak | Ret. Time (min) | Area (mAu*min) | Height (mAu) | Area % | Height % |
|------|-----------------|----------------|--------------|--------|----------|
| 1    | 25.68           | 49.378         | 59.790       | 53.57  | 60.15    |
| 2    | 33.51           | 42.802         | 39.613       | 46.43  | 39.85    |

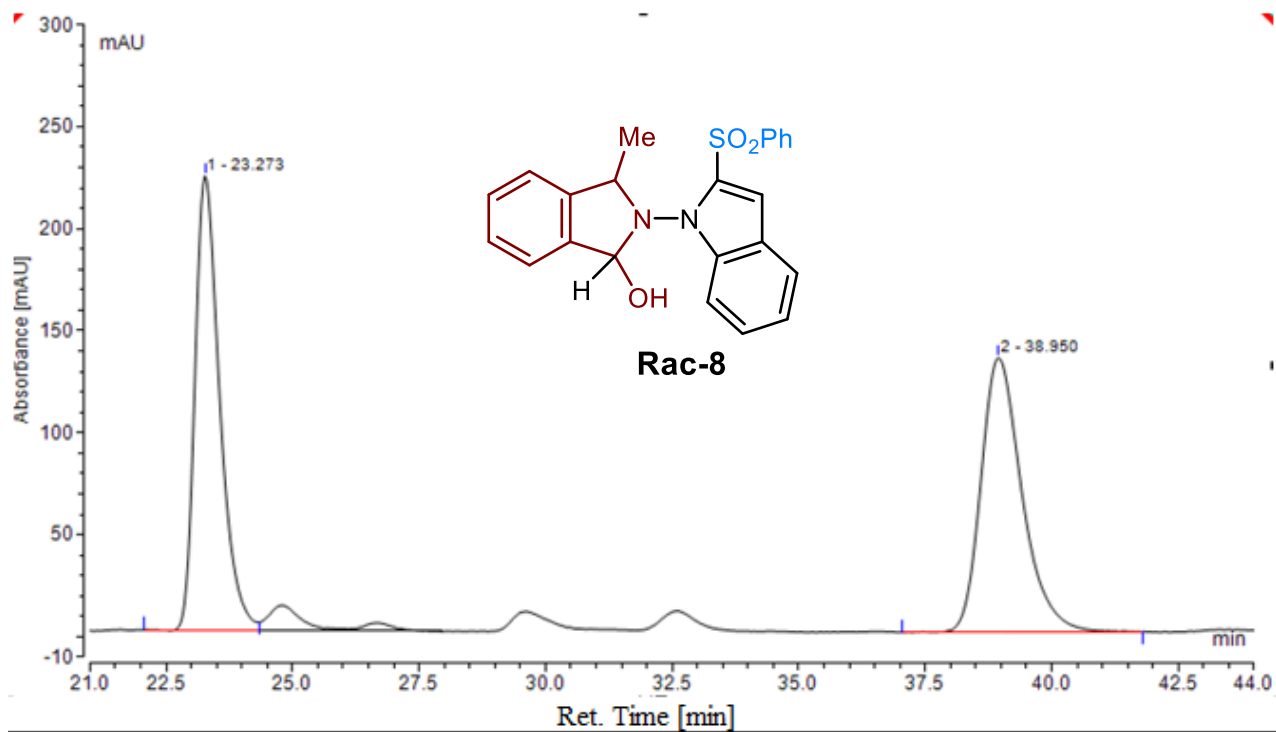

| Peak | Ret. Time (min) | Area (mAu*min) | Height (mAu) | Area % | Height % |
|------|-----------------|----------------|--------------|--------|----------|
| 1    | 23.27           | 125.833        | 222.811      | 49.91  | 62.35    |
| 2    | 38.95           | 126.273        | 134.545      | 50.09  | 37.65    |

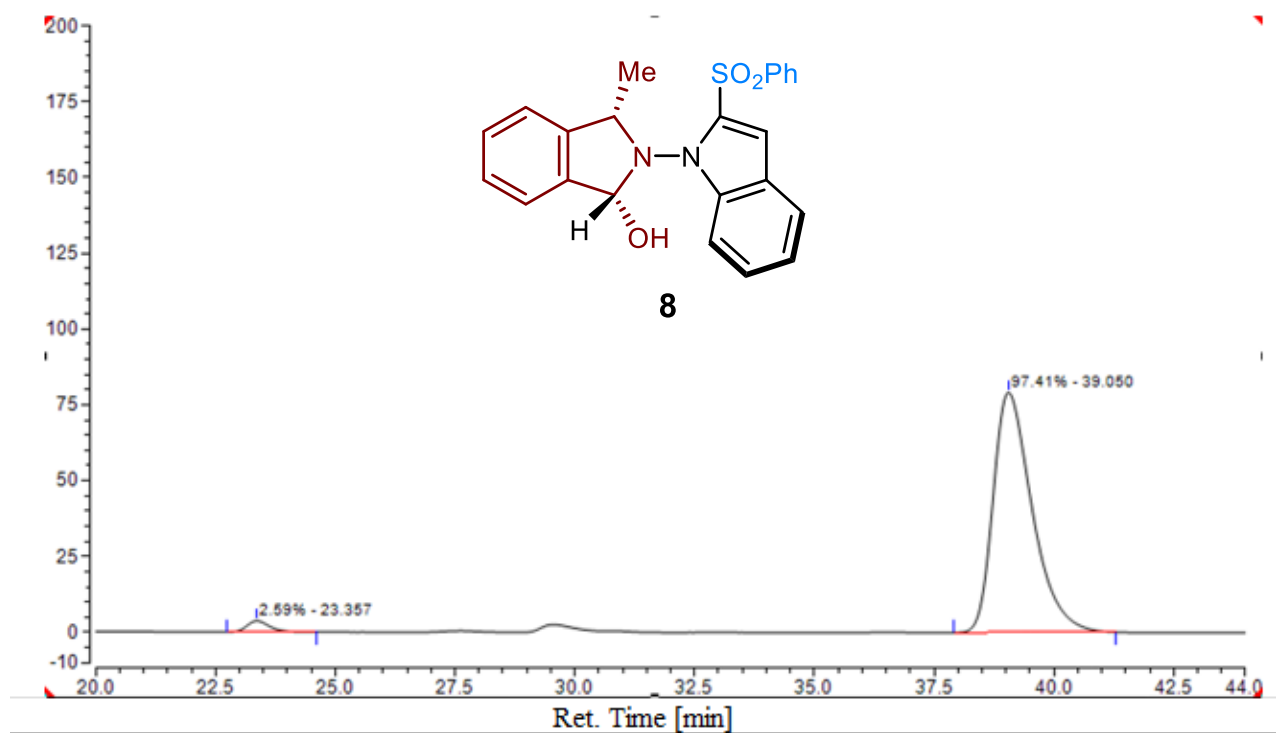

| Peak | Ret. Time (min) | Area (mAu*min) | Height (mAu) | Area % | Height % |
|------|-----------------|----------------|--------------|--------|----------|
| 1    | 23.36           | 1.986          | 3.669        | 2.59   | 4.43     |
| 2    | 39.05           | 74.730         | 79.173       | 97.41  | 95.57    |

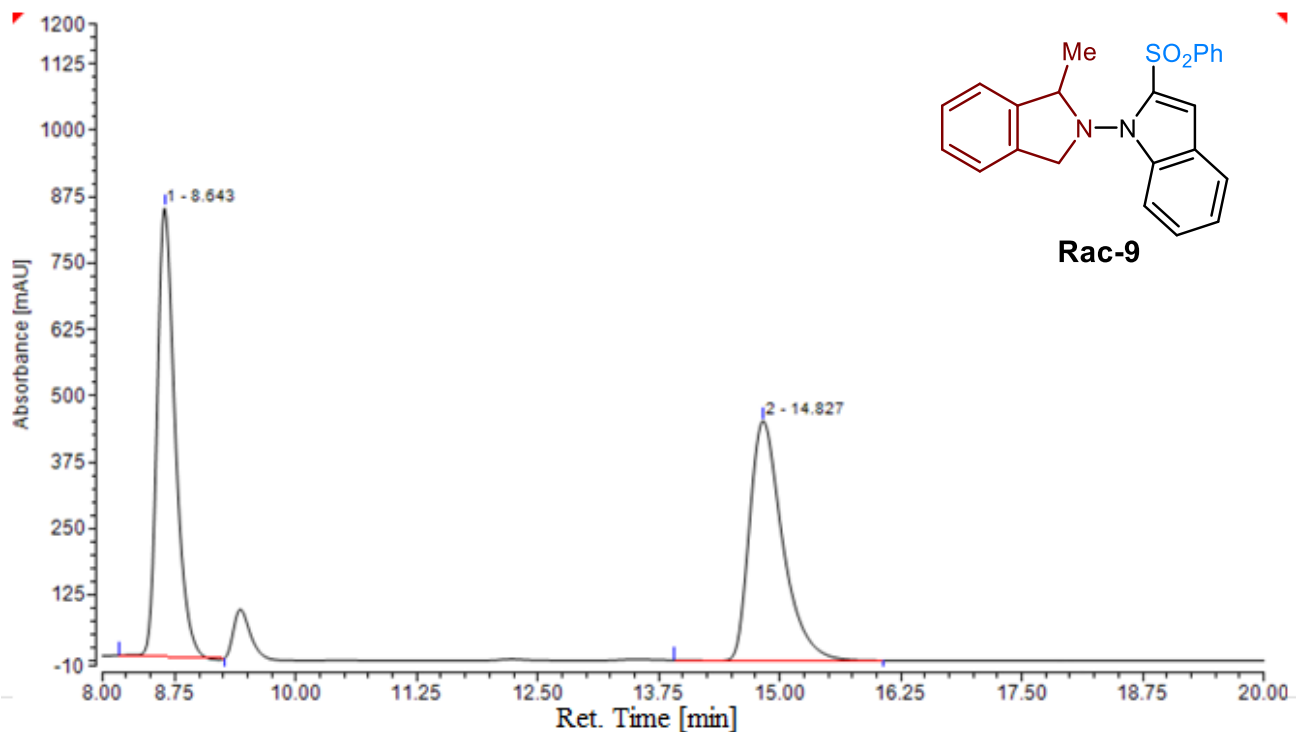

| Peak | Ret. Time (min) | Area (mAu*min) | Height (mAu) | Area % | Height % |
|------|-----------------|----------------|--------------|--------|----------|
| 1    | 8.64            | 181.404        | 845.161      | 50.45  | 65.18    |
| 2    | 14.83           | 178.146        | 451.402      | 49.55  | 34.82    |

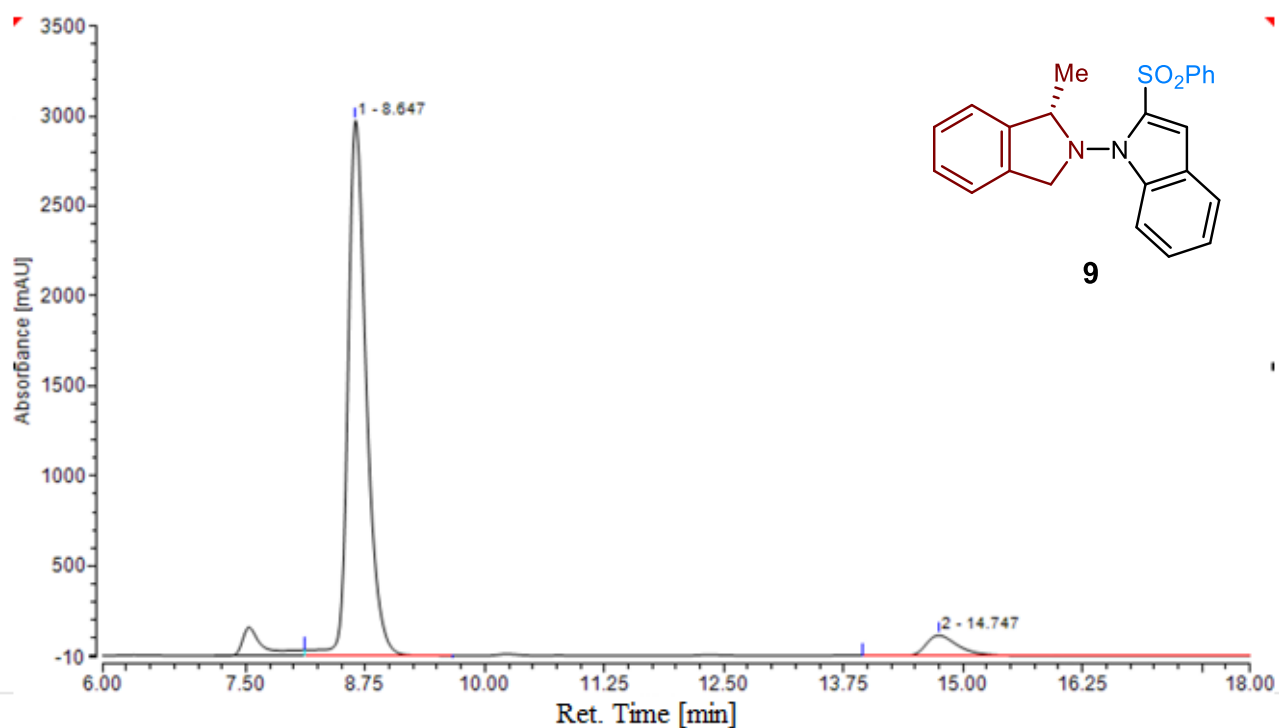

| Peak | Ret. Time (min) | Area (mAu*min) | Height (mAu) | Area % | Height % |
|------|-----------------|----------------|--------------|--------|----------|
| 1    | 8.65            | 663.380        | 2975.563     | 94.34  | 96.34    |
| 2    | 14.75           | 40.044         | 112.884      | 5.69   | 3.66     |

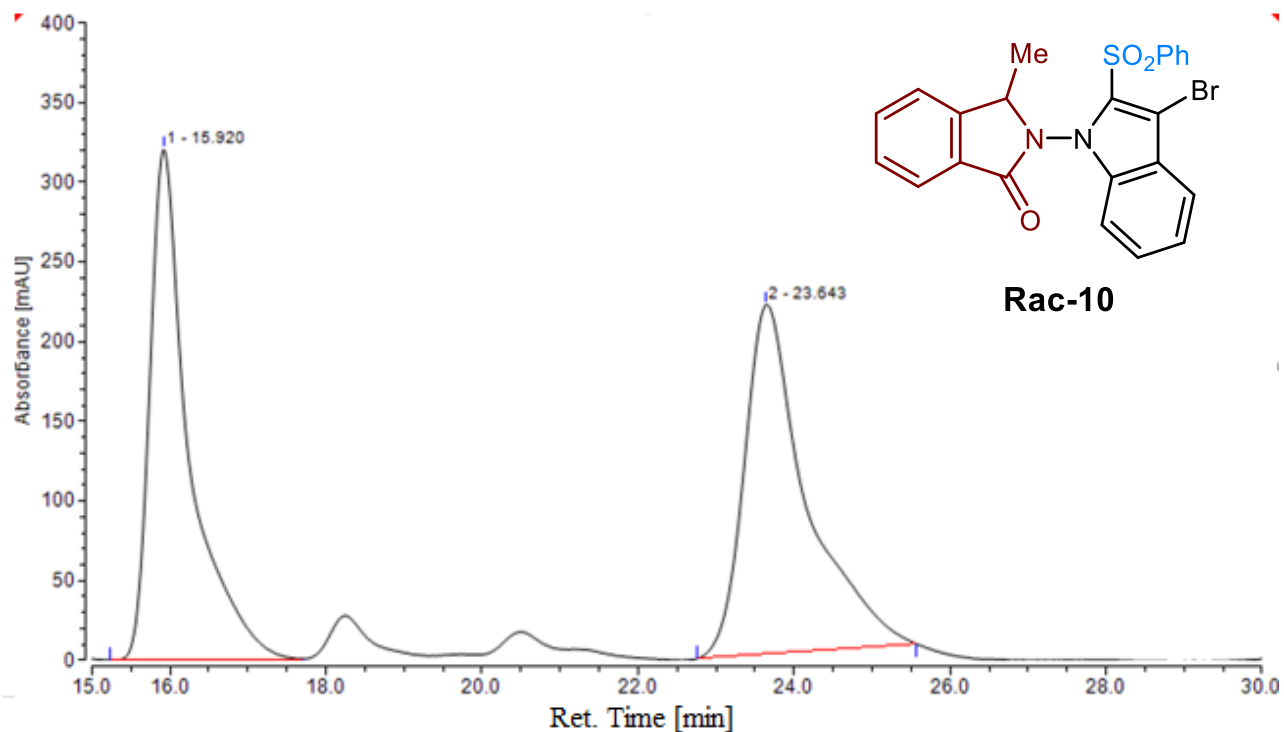

| Peak | Ret. Time (min) | Area (mAu*min) | Height (mAu) | Area % | Height % |
|------|-----------------|----------------|--------------|--------|----------|
| 1    | 15.92           | 185.942        | 320.407      | 48.04  | 59.37    |
| 2    | 23.64           | 201.093        | 219.255      | 51.96  | 40.63    |

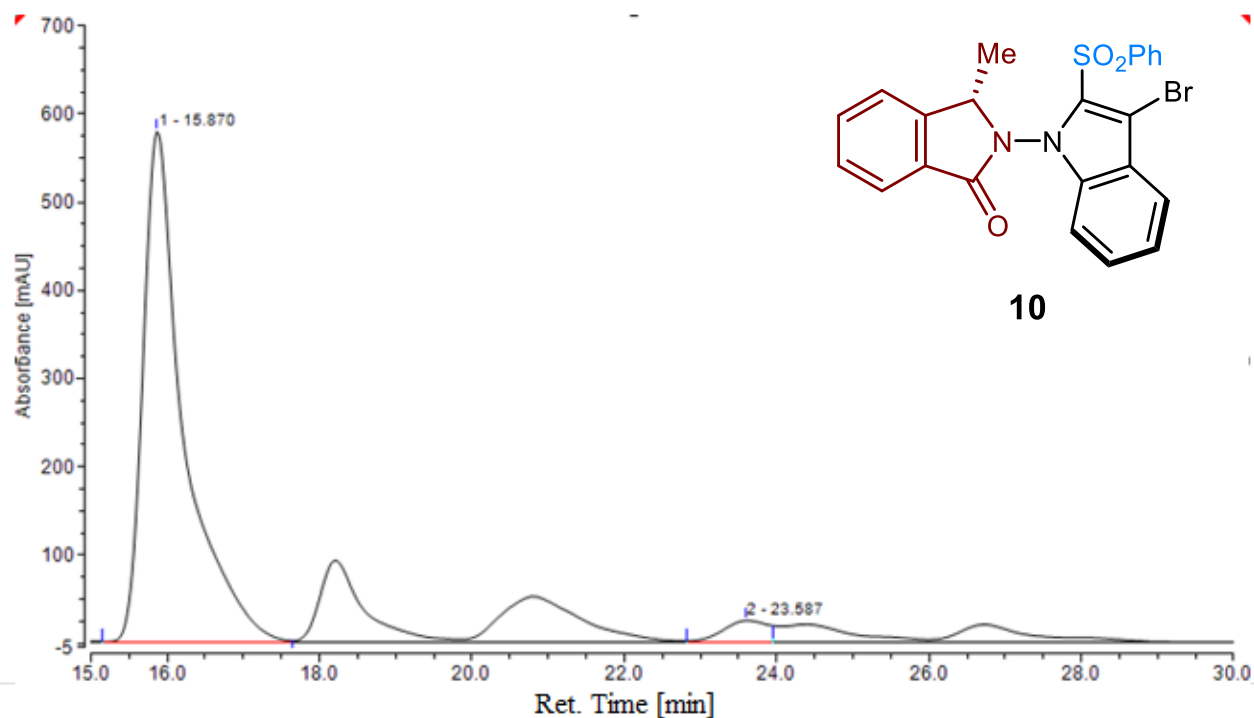

| Peak | Ret. Time (min) | Area (mAu*min) | Height (mAu) | Area % | Height % |
|------|-----------------|----------------|--------------|--------|----------|
| 1    | 15.87           | 357.821        | 578.969      | 95.45  | 95.86    |
| 2    | 23.59           | 17.068         | 24.997       | 4.55   | 4.14     |

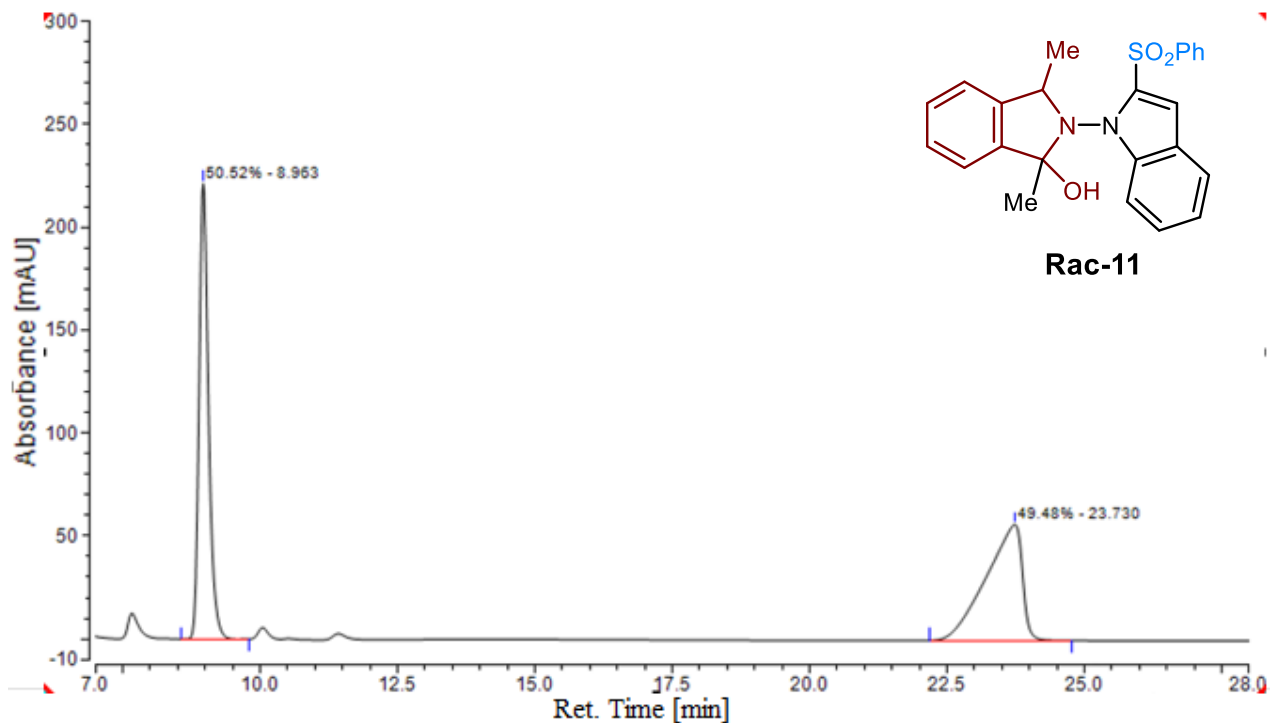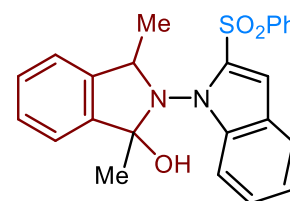

**Rac-11**

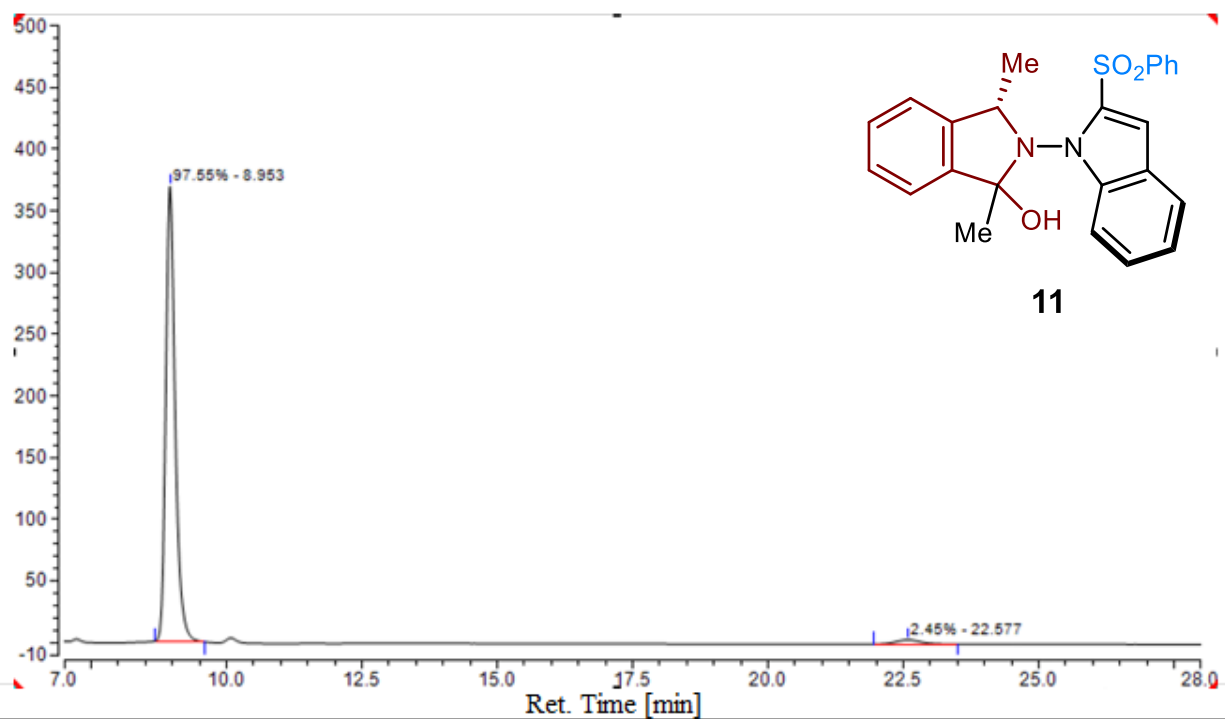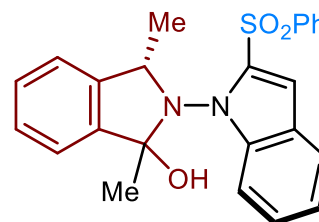

**11**
